# Supplementary material for: SAFB regulates hippocampal stem cell fate by targeting Drosha to destabilize Nfib mRNA
Source: eLife. 2024 May 9;13:e74940. doi: 10.7554/eLife.74940 (PMC11149935; doi:10.7554/eLife.74940)
Supplement: Supplementary file 1. — Proteins significantly enriched over control IP are marked in green. [file elife-74940-supp1.xlsx]

## Sheet: Sheet1
Drosha-IP
proteinName	geneName	nbPeptides	log2ratio_AB_Drosha	pValue_AB_Drosha	qValue_AB_Drosha
sp|B1AZI6|THOC2_MOUSE	Thoc2	6	3.0114	8.56309e-05	0.000249558
sp|B2RY56|RBM25_MOUSE	Rbm25	10	4.15461	1.82303e-08	1.29326e-07
sp|C0HKD8|MFA1A_MOUSE	Mfap1a	7	4.00054	1.06912e-08	7.92295e-08
sp|D3YXK2|SAFB1_MOUSE	Safb	13	4.43998	8.07884e-10	7.21015e-09
sp|G5E870|TRIPC_MOUSE	Trip12	4	3.048	0.000131689	0.000357196
sp|O08583|THOC4_MOUSE	Alyref	8	3.19206	1.07459e-05	4.21813e-05
sp|O08784|TCOF_MOUSE	Tcof1	17	4.98892	9.98962e-11	1.01114e-09
sp|O08810|U5S1_MOUSE	Eftud2	11	6.09014	7.30483e-14	1.41e-12
sp|O35286|DHX15_MOUSE	Dhx15	13	5.70536	2.221e-12	3.07238e-11
sp|O35326|SRSF5_MOUSE	Srsf5	4	3.21679	0.000350652	0.000797373
sp|O35691|PININ_MOUSE	Pnn	19	5.03422	3.0968e-11	3.36914e-10
sp|O35737|HNRH1_MOUSE	Hnrnph1	5	3.97454	1.25219e-06	6.22348e-06
sp|O35927|CTND2_MOUSE	Ctnnd2	25	3.52253	5.04883e-06	2.19399e-05
sp|O55143|AT2A2_MOUSE	Atp2a2	5	3.11268	0.000213194	0.000528212
sp|O70133|DHX9_MOUSE	Dhx9	16	4.18618	1.30267e-07	8.19104e-07
sp|O88291|ZN326_MOUSE	Znf326	5	4.20827	8.57161e-09	6.46767e-08
sp|O88532|ZFR_MOUSE	Zfr	6	3.76575	2.49636e-06	1.16403e-05
sp|O88569|ROA2_MOUSE	Hnrnpa2b1	17	3.75035	1.41468e-07	8.82847e-07
sp|P14733|LMNB1_MOUSE	Lmnb1	13	3.07753	0.000230442	0.000564209
sp|P14869|RLA0_MOUSE	Rplp0	6	3.55695	3.30967e-05	0.000111634
sp|P17225|PTBP1_MOUSE	Ptbp1	4	4.00141	3.87888e-07	2.17532e-06
sp|P25444|RS2_MOUSE	Rps2	12	3.16448	0.00027047	0.000645086
sp|P26231|CTNA1_MOUSE	Ctnna1	22	6.87791	2.43449e-17	1.1886e-15
sp|P29341|PABP1_MOUSE	Pabpc1	16	4.20585	1.87311e-07	1.1348e-06
sp|P30999|CTND1_MOUSE	Ctnnd1	9	3.30914	1.71142e-05	6.20297e-05
sp|P32067|LA_MOUSE	Ssb	4	3.57058	5.9872e-06	2.5096e-05
sp|P47757|CAPZB_MOUSE	Capzb	21	3.28766	4.54525e-05	0.000143662
sp|P48962|ADT1_MOUSE	Slc25a4	6	3.58194	1.0774e-05	4.21813e-05
sp|P49312|ROA1_MOUSE	Hnrnpa1	13	3.61775	1.18607e-06	5.96629e-06
sp|P53564|CUX1_MOUSE	Cux1	4	5.64483	2.87757e-14	6.28522e-13
sp|P57784|RU2A_MOUSE	Snrpa1	8	6.65989	4.7251e-16	1.6341e-14
sp|P61979|HNRPK_MOUSE	Hnrnpk	13	4.08471	2.32841e-07	1.39035e-06
sp|P62889|RL30_MOUSE	Rpl30	4	4.40096	3.70762e-07	2.09342e-06
sp|P62983|RS27A_MOUSE	Rps27a	7	3.04195	7.60087e-05	0.000224884
sp|P62996|TRA2B_MOUSE	Tra2b	8	3.45465	5.97339e-06	2.5096e-05
sp|P63154|CRNL1_MOUSE	Crnkl1	5	4.21355	4.41575e-10	4.07231e-09
sp|P67778|PHB_MOUSE	Phb	4	3.28987	6.29695e-05	0.000190385
sp|P70372|ELAV1_MOUSE	Elavl1	7	4.8023	6.52516e-09	5.0147e-08
sp|P83870|PHF5A_MOUSE	Phf5a	4	6.43963	2.76135e-17	1.27329e-15
sp|P84089|ERH_MOUSE	Erh	5	4.45609	4.31873e-09	3.41386e-08
sp|P84104|SRSF3_MOUSE	Srsf3	7	4.01105	8.03322e-07	4.21998e-06
sp|P97326|CADH6_MOUSE	Cdh6	7	5.47694	2.5106e-11	2.85452e-10
sp|Q00PI9|HNRL2_MOUSE	Hnrnpul2	7	3.58771	1.96221e-07	1.18017e-06
sp|Q02248|CTNB1_MOUSE	Ctnnb1	10	5.26029	7.41655e-13	1.07995e-11
sp|Q05A36|MEX3C_MOUSE	Mex3c	8	8.06185	1.1802e-23	1.95914e-21
sp|Q0P678|ZCH18_MOUSE	Zc3h18	4	4.29014	9.81294e-08	6.46408e-07
sp|Q3THE2|ML12B_MOUSE	Myl12b	7	3.29091	3.62379e-05	0.000118883
sp|Q3TKY6|CWC27_MOUSE	Cwc27	17	4.01944	2.88485e-07	1.68621e-06
sp|Q3U0V1|FUBP2_MOUSE	Khsrp	13	4.80118	1.10641e-10	1.10641e-09
sp|Q501J6|DDX17_MOUSE	Ddx17	8	3.20307	3.39209e-05	0.00011307
sp|Q5HZJ0|RNC_MOUSE	Drosha	20	4.71029	1.84261e-09	1.51422e-08
sp|Q60605|MYL6_MOUSE	Myl6	13	3.18404	3.65256e-05	0.000119355
sp|Q60668|HNRPD_MOUSE	Hnrnpd	6	3.8978	3.22132e-07	1.85673e-06
sp|Q60749|KHDR1_MOUSE	Khdrbs1	8	6.28238	1.11726e-14	2.6495e-13
sp|Q60865|CAPR1_MOUSE	Caprin1	10	3.25146	2.1544e-05	7.60915e-05
sp|Q60932|VDAC1_MOUSE	Vdac1	5	3.69314	0.000440271	0.000959121
sp|Q60972|RBBP4_MOUSE	Rbbp4	6	4.83917	1.54901e-10	1.51256e-09
sp|Q61029|LAP2B_MOUSE	Tmpo(lap2b)	22	3.4162	1.27049e-05	4.81883e-05
sp|Q61033|LAP2A_MOUSE	Tmpo(lap2a)	8	4.15307	4.33005e-08	2.9219e-07
sp|Q61136|PRP4B_MOUSE	Prpf4b	4	5.12244	1.00209e-12	1.43403e-11
sp|Q61315|APC_MOUSE	Apc	25	4.18561	3.29112e-08	2.27636e-07
sp|Q61545|EWS_MOUSE	Ewsr1	4	3.26919	0.000101339	0.000283202
sp|Q61584|FXR1_MOUSE	Fxr1	9	3.88257	4.66405e-06	2.03745e-05
sp|Q61753|SERA_MOUSE	Phgdh	5	3.06588	0.00028746	0.000677817
sp|Q62036|CP131_MOUSE	Cep131	6	3.26504	1.27147e-05	4.81883e-05
sp|Q62255|SALL3_MOUSE	Sall3	6	6.68104	9.18182e-17	3.81046e-15
sp|Q64012|RALY_MOUSE	Raly	12	5.09555	1.08748e-09	9.13852e-09
sp|Q64213|SF01_MOUSE	Sf1	7	3.98392	1.15613e-07	7.40898e-07
sp|Q6A068|CDC5L_MOUSE	Cdc5l	19	5.05797	8.11213e-14	1.53024e-12
sp|Q6A0A9|F120A_MOUSE	FAM120A	11	3.45249	4.52055e-06	2.00645e-05
sp|Q6NZF1|ZC11A_MOUSE	Zc3h11a	7	5.03253	1.78968e-10	1.7074e-09
sp|Q6NZJ6|IF4G1_MOUSE	Eif4g1	9	3.05539	0.000102157	0.000284532
sp|Q6NZN0|RBM26_MOUSE	Rbm26	4	3.49603	4.85416e-07	2.704e-06
sp|Q6P4T2|U520_MOUSE	Snrnp200	10	4.67253	2.35346e-09	1.91507e-08
sp|Q6P8I4|PCNP_MOUSE	Pcnp	5	4.40718	1.16295e-08	8.54205e-08
sp|Q6PDM2|SRSF1_MOUSE	Srsf1	14	3.37486	6.76226e-06	2.80634e-05
sp|Q6PDQ2|CHD4_MOUSE	Chd4	6	3.42953	7.93723e-06	3.22936e-05
sp|Q6PE01|SNR40_MOUSE	Snrnp40	7	5.74091	2.43176e-16	8.77547e-15
sp|Q6PFR5|TRA2A_MOUSE	Tra2a	5	3.36934	2.497e-05	8.59418e-05
sp|Q6PIE5|AT1A2_MOUSE	Atp1a2	13	3.01248	0.00017365	0.000444844
sp|Q6URW6|MYH14_MOUSE	Myh14	53	3.04935	0.000158398	0.000411332
sp|Q6ZWV3|RL10_MOUSE	Rpl10	9	3.36913	4.53174e-05	0.000143662
sp|Q7TMK9|HNRPQ_MOUSE	Syncrip	5	4.05423	3.3521e-07	1.91879e-06
sp|Q80X90|FLNB_MOUSE	Flnb	7	3.35177	0.00029744	0.000691528
sp|Q80YR5|SAFB2_MOUSE	Safb2	4	3.38199	1.24941e-05	4.77884e-05
sp|Q8BG05|ROA3_MOUSE	Hnrnpa3	16	3.79664	1.42854e-06	7.01593e-06
sp|Q8BJ05|ZC3HE_MOUSE	Zc3h14	13	5.71628	1.02875e-14	2.51136e-13
sp|Q8BP67|RL24_MOUSE	Rpl24	10	3.2075	4.7796e-05	0.000148025
sp|Q8BTI8|SRRM2_MOUSE	Srrm2	36	3.67566	7.79962e-07	4.12336e-06
sp|Q8BX10|PGAM5_MOUSE	Pgam5	8	3.49319	1.93982e-05	6.91011e-05
sp|Q8C2Q3|RBM14_MOUSE	Rbm14	20	3.19731	4.55217e-05	0.000143662
sp|Q8C3F2|F120C_MOUSE	Fam120c	4	3.49358	1.10394e-06	5.62129e-06
sp|Q8C5N3|CWC22_MOUSE	Cwc22	12	5.27164	7.71062e-12	9.69669e-11
sp|Q8C854|MYEF2_MOUSE	Myef2	8	3.78981	1.58945e-06	7.68491e-06
sp|Q8CCS6|PABP2_MOUSE	Pabpn1	4	5.40882	6.21154e-12	8.05559e-11
sp|Q8CGC7|SYEP_MOUSE	Eprs	4	3.24455	4.57971e-05	0.000143983
sp|Q8CGZ0|CHERP_MOUSE	Cherp	10	5.59185	2.00124e-13	3.5341e-12
sp|Q8CH18|CCAR1_MOUSE	Ccar1	9	5.58713	6.7747e-13	1.00411e-11
sp|Q8CH25|SLTM_MOUSE	Sltm	4	3.77292	1.14513e-05	4.4414e-05
sp|Q8CHY6|P66A_MOUSE	Gatad2a	6	3.39269	7.40881e-06	3.02922e-05
sp|Q8JZX4|SPF45_MOUSE	Rbm17	10	6.28357	9.0056e-17	3.81046e-15
sp|Q8K019|BCLF1_MOUSE	Bclaf1	28	3.42003	4.62746e-06	2.03217e-05
sp|Q8K310|MATR3_MOUSE	Matr3	18	4.02543	4.10459e-08	2.81554e-07
sp|Q8K354|CBR3_MOUSE	Cbr3	19	6.90984	8.38531e-21	5.79984e-19
sp|Q8K4B0|MTA1_MOUSE	Mta1	4	5.91406	5.99802e-16	1.91475e-14
sp|Q8K4Z5|SF3A1_MOUSE	Sf3a1	19	6.49908	1.40316e-16	5.54581e-15
sp|Q8R081|HNRPL_MOUSE	Hnrnpl	13	5.00497	2.93604e-11	3.29313e-10
sp|Q8R326|PSPC1_MOUSE	Pspc1	7	3.1655	0.000100007	0.000280424
sp|Q8R344|CCD12_MOUSE	Ccdc12	4	6.40364	2.04629e-15	5.85663e-14
sp|Q8VE97|SRSF4_MOUSE	Srsf4	5	3.18591	3.32213e-05	0.000111634
sp|Q8VEK3|HNRPU_MOUSE	Hnrnpu	25	3.08213	8.91953e-05	0.000257056
sp|Q8VHR5|P66B_MOUSE	Gatad2b	6	4.562	8.38801e-10	7.32847e-09
sp|Q91VC3|IF4A3_MOUSE	Eif4a3	9	5.25286	1.44112e-11	1.75902e-10
sp|Q91VM5|RMXL1_MOUSE	Rbmxl1	24	3.60335	6.20071e-07	3.34194e-06
sp|Q91VR5|DDX1_MOUSE	Ddx1	8	3.96899	4.27233e-06	1.92719e-05
sp|Q91W39|NCOA5_MOUSE	Ncoa5	12	5.55853	1.72851e-13	3.11883e-12
sp|Q91W50|CSDE1_MOUSE	Csde1	6	3.63661	8.84635e-06	3.56431e-05
sp|Q91YE7|RBM5_MOUSE	Rbm5	9	5.56296	3.87265e-14	7.83975e-13
sp|Q91YQ5|RPN1_MOUSE	Rpn1	5	3.08074	0.000149344	0.000391027
sp|Q91YR7|PRP6_MOUSE	Prpf6	9	4.86528	8.66182e-10	7.48887e-09
sp|Q91Z49|UIF_MOUSE	Fyttd1	10	5.96121	2.26029e-13	3.78603e-12
sp|Q921M3|SF3B3_MOUSE	Sf3b3	11	6.44031	8.6752e-16	2.66682e-14
sp|Q922U1|PRPF3_MOUSE	Prpf3	6	6.2308	2.28603e-14	5.12812e-13
sp|Q922V4|PLRG1_MOUSE	Plrg1	4	5.67146	2.28074e-13	3.78603e-12
sp|Q923D5|WBP11_MOUSE	Wbp11	6	3.71314	5.57981e-07	3.04687e-06
sp|Q99020|ROAA_MOUSE	Hnrnpab	4	3.55071	5.15555e-06	2.2287e-05
sp|Q99JR1|SFXN1_MOUSE	Sfxn1	4	3.16619	7.61353e-05	0.000224884
sp|Q99KG3|RBM10_MOUSE	Rbm10	18	4.47513	6.05204e-09	4.69457e-08
sp|Q99KN9|EPN4_MOUSE	Clint1	4	5.90698	3.42048e-14	7.27947e-13
sp|Q99KP6|PRP19_MOUSE	Prpf19	8	6.02831	7.24445e-15	1.82209e-13
sp|Q99LF4|RTCB_MOUSE	Rtcb	6	3.72166	1.59356e-06	7.68491e-06
sp|Q99NB9|SF3B1_MOUSE	Sf3b1	35	5.51371	1.35635e-13	2.50172e-12
sp|Q99PU5|ACBG1_MOUSE	Acsbg1	4	3.39479	0.000160424	0.000414804
sp|Q99PV0|PRP8_MOUSE	Prpf8	15	5.09466	2.32004e-11	2.67449e-10
sp|Q9CSN1|SNW1_MOUSE	Snw1	12	4.57141	8.65874e-11	9.09716e-10
sp|Q9CWZ3|RBM8A_MOUSE	Rbm8a	4	5.62455	3.33981e-15	9.24014e-14
sp|Q9CX86|ROA0_MOUSE	Hnrnpa0	7	3.73707	1.82474e-06	8.65447e-06
sp|Q9CY27|TECR_MOUSE	Tecr	5	3.42641	2.10031e-05	7.4498e-05
sp|Q9CY57|CHTOP_MOUSE	Chtop	5	5.5732	3.74279e-14	7.76629e-13
sp|Q9D0B0|SRSF9_MOUSE	Srsf9	7	3.20617	3.52298e-05	0.000116497
sp|Q9D0E1|HNRPM_MOUSE	Hnrnpm	23	3.79909	8.7301e-07	4.47283e-06
sp|Q9D554|SF3A3_MOUSE	Sf3a3	7	6.64442	5.62048e-16	1.866e-14
sp|Q9DAW6|PRP4_MOUSE	Prpf4	5	5.81305	2.79089e-13	4.45469e-12
sp|Q9DBR1|XRN2_MOUSE	Xrn2	6	3.3648	2.40383e-05	8.34802e-05
sp|Q9DCD2|SYF1_MOUSE	Xab2	4	4.77782	3.2715e-12	4.45138e-11
sp|Q9EPU0|RENT1_MOUSE	Upf1	4	3.31644	4.05442e-05	0.000130423
sp|Q9EQM6|DGCR8_MOUSE	Dgcr8	30	7.27717	1.23253e-20	7.86925e-19
sp|Q9ERA6|TFP11_MOUSE	Tfip11	4	4.6941	1.09002e-09	9.13852e-09
sp|Q9JHS9|CWC15_MOUSE	Cwc15	5	5.85013	3.57917e-15	9.58294e-14
sp|Q9JIX8|ACINU_MOUSE	Acin1	15	4.70287	8.20047e-10	7.24084e-09
sp|Q9JKF1|IQGA1_MOUSE	Iqgap1	5	3.02952	0.00010422	0.000288818
sp|Q9QX47|SON_MOUSE	Son	12	4.52592	5.12386e-10	4.67341e-09
sp|Q9QX96|SALL2_MOUSE	Sall2	8	7.83958	1.60251e-22	1.90012e-20
sp|Q9QYS9|QKI_MOUSE	Qki	5	4.34938	2.42113e-07	1.4252e-06
sp|Q9R0U0|SRS10_MOUSE	Srsf10	5	4.00443	3.09237e-07	1.79487e-06
sp|Q9R190|MTA2_MOUSE	Mta2	5	4.6268	3.47339e-09	2.77203e-08
sp|Q9R1C7|PR40A_MOUSE	Prpf40a	7	5.08353	3.04771e-11	3.36914e-10
sp|Q9WVA3|BUB3_MOUSE	Bub3	5	4.66669	7.27808e-09	5.54203e-08
sp|Q9WVR4|FXR2_MOUSE	Fxr2	10	3.59304	6.01699e-06	2.5096e-05
sp|Q9Z1M8|RED_MOUSE	Ik	10	3.95042	1.01383e-07	6.6258e-07
sp|Q9Z1X4|ILF3_MOUSE	Ilf3	8	4.82305	7.45784e-10	6.72827e-09
sp|Q9Z204|HNRPC_MOUSE	Hnrnpc	13	4.40706	1.59469e-09	1.32359e-08
sp|Q9Z2D8|MBD3_MOUSE	Mbd3	4	4.87867	9.52519e-11	9.76038e-10
sp|Q9Z2X1|HNRPF_MOUSE	Hnrnpf	6	4.16716	5.95943e-07	3.23289e-06
sp|Q9Z315|SNUT1_MOUSE	Sart1	15	3.93211	1.18715e-07	7.52162e-07
Biognosys|iRT	NA	10	-0.0164953	0.931267	0.93239
sp|A2A4P0|DHX8_MOUSE	Dhx8	1	8.54255	4.11896e-21	3.10794e-19
sp|A2AGT5|CKAP5_MOUSE	Ckap5	5	2.1066	0.00485978	0.00632229
sp|A2AHG0|LZTS3_MOUSE	Lzts3	3	1.94184	0.0131287	0.0148256
sp|A2AHJ4|BRWD3_MOUSE	Brwd3	2	-0.624304	0.330841	0.335285
sp|A2AI08|TPRN_MOUSE	Tprn	9	1.90741	0.0146597	0.0164426
sp|A2AJI0|MA7D1_MOUSE	Map7d1	3	1.97669	0.00297504	0.00427952
sp|A2ALU4|SHRM2_MOUSE	Shroom2	14	1.99031	0.00726814	0.00890165
sp|A2APB8|TPX2_MOUSE	Tpx2	1	0.243962	0.000293806	0.000689059
sp|A2APV2|FMNL2_MOUSE	Fmnl2	2	2.67006	0.00100631	0.00180396
sp|A2AR02|PPIG_MOUSE	Ppig	3	4.83704	1.93674e-10	1.82669e-09
sp|B2RQE8|RHG42_MOUSE	Arhgap42	5	1.80364	0.0117257	0.0134054
sp|E1U8D0|SOGA1_MOUSE	Soga1	3	2.55728	0.000265422	0.00063487
sp|E9PVX6|KI67_MOUSE	Mki67	12	2.36625	0.00195001	0.00301398
sp|E9Q4F7|ANR11_MOUSE	Ankrd11	1	2.32143	0.00184617	0.00288573
sp|E9Q5C9|NOLC1_MOUSE	Nolc1	7	2.03886	0.00617384	0.00774062
sp|E9Q5K9|YTDC1_MOUSE	Ythdc1	2	2.42928	0.00172456	0.00274738
sp|E9Q634|MYO1E_MOUSE	Myo1e	21	2.52266	0.0014063	0.00234383
sp|F8VPU2|FARP1_MOUSE	Farp1	3	2.56687	0.00200168	0.00306531
sp|G3X9C2|FBX50_MOUSE	Nccrp1	1	-3.97959	3.7002e-07	2.09342e-06
sp|G3X9J0|SI1L3_MOUSE	Sipa1l3	32	1.93157	0.00969862	0.0114182
sp|G5E8K5|ANK3_MOUSE	Ank3	6	2.61383	0.000854602	0.00157627
sp|O08547|SC22B_MOUSE	Sec22b	1	4.537	2.8235e-08	1.96933e-07
sp|O08808|DIAP1_MOUSE	Diaph1	3	7.97986	2.54647e-26	5.28392e-24
sp|O08917|FLOT1_MOUSE	Flot1	3	1.97081	0.0405202	0.0432842
sp|O09106|HDAC1_MOUSE	Hdac1	2	1.34661	0.0789503	0.0824261
sp|O09167|RL21_MOUSE	Rpl21	6	2.5251	0.000901341	0.00165175
sp|O35129|PHB2_MOUSE	Phb2	6	2.69143	0.000633176	0.0012818
sp|O35130|NEP1_MOUSE	Emg1	1	2.37651	0.00338244	0.0046873
sp|O35295|PURB_MOUSE	Purb	4	2.89923	9.84732e-05	0.000278003
sp|O35343|IMA3_MOUSE	Kpna4	1	3.7004	6.51617e-07	3.48931e-06
sp|O35625|AXIN1_MOUSE	Axin1	1	5.82601	3.84907e-15	9.98353e-14
sp|O54734|OST48_MOUSE	Ddost	3	3.38927	8.67027e-05	0.00025162
sp|O54784|DAPK3_MOUSE	Dapk3	1	3.44939	3.73588e-05	0.000121599
sp|O54931|AKAP2_MOUSE	Akap2	15	1.90275	0.011958	0.0136468
sp|O55128|SAP18_MOUSE	Sap18	2	4.96384	3.12559e-11	3.36914e-10
sp|O55142|RL35A_MOUSE	Rpl35a	9	2.87229	0.000200821	0.000500546
sp|O70126|AURKB_MOUSE	Aurkb	3	1.30665	0.0511371	0.0540685
sp|O70251|EF1B_MOUSE	Eef1b	1	2.21029	0.00244366	0.00361421
sp|O70279|DGC14_MOUSE	Dgcr14	1	4.47355	6.75564e-12	8.62644e-11
sp|O70305|ATX2_MOUSE	Atxn2	6	2.6864	0.00176955	0.00278696
sp|O70503|DHB12_MOUSE	Hsd17b12	5	2.51411	0.00423507	0.00563319
sp|O88286|WIZ_MOUSE	Wiz	2	2.64214	9.65299e-05	0.000273446
sp|O88342|WDR1_MOUSE	Wdr1	8	2.87155	0.000937023	0.0017093
sp|O88343|S4A4_MOUSE	Slc4a4	1	2.69148	0.00492002	0.0063707
sp|O88566|AXIN2_MOUSE	Axin2	3	3.9394	1.94914e-06	9.19195e-06
sp|O88746|TOM1_MOUSE	Tom1	6	2.70111	0.000901498	0.00165175
sp|O88952|LIN7C_MOUSE	Lin7c	1	1.70318	0.0147999	0.0165775
sp|O88967|YMEL1_MOUSE	Yme1l1	1	3.82225	1.60361e-05	5.83771e-05
sp|O89086|RBM3_MOUSE	Rbm3	3	0.927878	0.244845	0.249657
sp|P03930|ATP8_MOUSE	Mtatp8	2	3.35426	4.43962e-05	0.000141726
sp|P03975|IGEB_MOUSE	Iap	1	4.28272	8.41607e-08	5.58827e-07
sp|P03995|GFAP_MOUSE	Gfap	45	2.39915	0.00254432	0.00374193
sp|P05213|TBA1B_MOUSE	Tuba1b	13	2.4408	0.000217587	0.000537493
sp|P08226|APOE_MOUSE	Apoe	2	1.04552	0.250981	0.2556
sp|P08752|GNAI2_MOUSE	Gnai2	4	2.44147	0.00692402	0.00855358
sp|P08775|RPB1_MOUSE	Polr2a	2	4.08091	1.13558e-06	5.74713e-06
sp|P09103|PDIA1_MOUSE	P4hb	4	-1.96852	0.00876087	0.0104626
sp|P09405|NUCL_MOUSE	Ncl	16	2.25567	0.00368117	0.00501703
sp|P09602|HMGN2_MOUSE	Hmgn2	6	2.41225	0.00300065	0.00430145
sp|P0CG14|CTF8A_MOUSE	Chtf8	3	-1.11049	0.0994372	0.103295
sp|P10126|EF1A1_MOUSE	Eef1a1	17	1.73953	0.0402665	0.0430686
sp|P10630|IF4A2_MOUSE	Eif4a2	1	2.53939	0.00983138	0.0115004
sp|P10854|H2B1M_MOUSE	Hist1h2bm	12	2.4573	0.00206694	0.00313059
sp|P10922|H10_MOUSE	H1f0	4	2.6634	0.000554116	0.0011614
sp|P11103|PARP1_MOUSE	Parp1	3	2.94495	6.37082e-05	0.000191344
sp|P11499|HS90B_MOUSE	Hsp90ab1	10	1.37772	0.0532041	0.0561111
sp|P12787|COX5A_MOUSE	Cox5a	2	5.27092	1.52103e-10	1.50292e-09
sp|P12970|RL7A_MOUSE	Rpl7a	17	2.71322	0.00131048	0.00221527
sp|P13595|NCAM1_MOUSE	Ncam1	2	2.80299	0.00312499	0.00442618
sp|P13864|DNMT1_MOUSE	Dnmt1	1	2.34742	0.00294321	0.00424108
sp|P14115|RL27A_MOUSE	Rpl27a	5	2.68553	0.00126968	0.00216838
sp|P14131|RS16_MOUSE	Rps16	12	2.8537	0.000643367	0.0012961
sp|P14148|RL7_MOUSE	Rpl7	20	2.12791	0.00490789	0.00636492
sp|P14602|HSPB1_MOUSE	Hspb1	1	4.50398	0.00945986	0.0111688
sp|P14873|MAP1B_MOUSE	Map1b	1	3.53713	9.3983e-06	3.75028e-05
sp|P15105|GLNA_MOUSE	Glul	1	2.21962	0.190403	0.195588
sp|P15116|CADH2_MOUSE	Cdh2	3	5.37405	2.14872e-13	3.71549e-12
sp|P15864|H12_MOUSE	Hist1h1c	19	2.51024	0.00160395	0.00258501
sp|P16546|SPTN1_MOUSE	Sptan1	66	2.43872	0.00416642	0.0055597
sp|P16858|G3P_MOUSE	Gapdh	5	1.43765	0.113713	0.117537
sp|P17095|HMGA1_MOUSE	Hmga1	3	1.88914	0.015034	0.016817
sp|P17182|ENOA_MOUSE	Eno1	7	2.7258	0.0088816	0.0105916
sp|P18608|HMGN1_MOUSE	Hmgn1	8	2.19203	0.0110978	0.0128289
sp|P18760|COF1_MOUSE	Cfl1	10	2.33142	0.00318896	0.00447858
sp|P18826|KPB1_MOUSE	Phka1	2	2.18376	0.00182287	0.00285468
sp|P19253|RL13A_MOUSE	Rpl13a	13	2.35738	0.00315031	0.00444686
sp|P19324|SERPH_MOUSE	Serpinh1	1	-1.90831	1.76996e-05	6.35961e-05
sp|P20029|GRP78_MOUSE	Hspa5	21	1.70655	0.07269	0.0760816
sp|P20152|VIME_MOUSE	Vim	69	1.86941	0.017115	0.0189153
sp|P20357|MTAP2_MOUSE	Map2	24	0.800415	0.342608	0.346786
sp|P21107|TPM3_MOUSE	Tpm3	16	2.18802	0.00574249	0.00727674
sp|P23198|CBX3_MOUSE	Cbx3	2	2.38304	0.000399414	0.000886401
sp|P23242|CXA1_MOUSE	Gja1	9	2.12111	0.0102424	0.0119232
sp|P25911|LYN_MOUSE	Lyn	4	2.70639	0.0016075	0.0025857
sp|P26369|U2AF2_MOUSE	U2af2	2	2.85202	0.000158586	0.000411332
sp|P26443|DHE3_MOUSE	Glud1	1	3.27877	5.58294e-05	0.000170431
sp|P26645|MARCS_MOUSE	Marcks	3	1.66368	0.080688	0.0841345
sp|P27546|MAP4_MOUSE	Map4	17	0.989859	0.20046	0.205664
sp|P27659|RL3_MOUSE	Rpl3	20	2.61764	0.00112989	0.00198688
sp|P27661|H2AX_MOUSE	H2afx	2	2.58661	0.000948651	0.00171543
sp|P28652|KCC2B_MOUSE	Camk2b	12	2.9511	0.000184868	0.00046978
sp|P28656|NP1L1_MOUSE	Nap1l1	2	3.93968	1.06467e-05	4.208e-05
sp|P28658|ATX10_MOUSE	Atxn10	1	4.92343	1.94924e-08	1.37107e-07
sp|P28667|MRP_MOUSE	Marcksl1	2	1.135	0.279778	0.28423
sp|P28740|KIF2A_MOUSE	Kif2a	4	2.6163	0.000820831	0.00153444
sp|P28798|GRN_MOUSE	Grn	2	-0.55131	0.397099	0.401453
sp|P31650|S6A11_MOUSE	Slc6a11	2	3.87695	5.61012e-06	2.38843e-05
sp|P31786|ACBP_MOUSE	Dbi	1	-0.0125616	0.898037	0.900206
sp|P33215|NEDD1_MOUSE	Nedd1	1	2.93328	3.61633e-05	0.000118883
sp|P35278|RAB5C_MOUSE	Rab5c	1	3.54789	0.00655694	0.00816309
sp|P35550|FBRL_MOUSE	Fbl	9	2.34993	0.00283511	0.00411389
sp|P35564|CALX_MOUSE	Canx	2	0.569483	0.121766	0.125547
sp|P35601|RFC1_MOUSE	Rfc1	2	3.6164	2.96363e-05	0.000100812
sp|P35922|FMR1_MOUSE	Fmr1	3	3.1371	2.42338e-05	8.38084e-05
sp|P35979|RL12_MOUSE	Rpl12	5	1.86554	0.0203863	0.0223522
sp|P35980|RL18_MOUSE	Rpl18	11	2.61312	0.00141394	0.00235184
sp|P38647|GRP75_MOUSE	Hspa9	6	0.910811	0.231773	0.236619
sp|P39038|CADH4_MOUSE	Cdh4	2	5.9535	4.69049e-13	7.20946e-12
sp|P39447|ZO1_MOUSE	Tjp1	110	1.84895	0.0157242	0.0174947
sp|P39688|FYN_MOUSE	Fyn	2	1.14907	0.108889	0.112691
sp|P41105|RL28_MOUSE	Rpl28	14	2.54023	0.00114515	0.00200358
sp|P43274|H14_MOUSE	Hist1h1e	6	2.45214	0.00323114	0.00452602
sp|P43275|H11_MOUSE	Hist1h1a	7	2.61592	0.00209536	0.00315635
sp|P43276|H15_MOUSE	Hist1h1b	10	2.40874	0.00361483	0.00494285
sp|P43277|H13_MOUSE	Hist1h1d	2	2.54242	0.00351131	0.00483778
sp|P45591|COF2_MOUSE	Cfl2	4	2.69274	0.00317921	0.00447244
sp|P46062|SIPA1_MOUSE	Sipa1	13	2.10761	0.00542665	0.00692942
sp|P46471|PRS7_MOUSE	Psmc2	1	2.18842	0.00165596	0.00264826
sp|P46662|MERL_MOUSE	Nf2	5	2.19944	0.00238449	0.00353644
sp|P46735|MYO1B_MOUSE	Myo1b	30	2.93219	0.000845679	0.00156677
sp|P47753|CAZA1_MOUSE	Capza1	10	2.34039	0.00443352	0.00585027
sp|P47754|CAZA2_MOUSE	Capza2	18	2.52095	0.00156492	0.00253688
sp|P47758|SRPRB_MOUSE	Srprb	1	2.6491	0.000914697	0.00167224
sp|P47911|RL6_MOUSE	Rpl6	19	2.76786	0.00112501	0.00198286
sp|P47915|RL29_MOUSE	Rpl29	4	2.6068	0.00118344	0.00205028
sp|P47963|RL13_MOUSE	Rpl13	20	2.24437	0.0044608	0.00586762
sp|P47964|RL36_MOUSE	Rpl36	3	2.92408	0.000138887	0.000371858
sp|P48678|LMNA_MOUSE	Lmna	7	2.91594	0.00205256	0.0031168
sp|P50580|PA2G4_MOUSE	Pa2g4	4	2.12969	0.00810201	0.00976004
sp|P51150|RAB7A_MOUSE	Rab7a	2	4.30275	1.49827e-06	7.31507e-06
sp|P51410|RL9_MOUSE	Rpl9	7	2.66454	0.00181415	0.00285179
sp|P51660|DHB4_MOUSE	Hsd17b4	1	3.35685	2.50577e-05	8.59418e-05
sp|P51880|FABP7_MOUSE	Fabp7	3	2.67988	0.00356957	0.00490222
sp|P51881|ADT2_MOUSE	Slc25a5	17	2.8846	0.000661037	0.00130476
sp|P52293|IMA1_MOUSE	Kpna2	1	2.92902	0.000278959	0.000661531
sp|P52480|KPYM_MOUSE	Pkm	3	2.36562	0.114374	0.118073
sp|P52927|HMGA2_MOUSE	Hmga2	2	2.27855	0.00328804	0.00458667
sp|P53026|RL10A_MOUSE	Rpl10a	9	2.83477	0.000252422	0.000609391
sp|P53986|MOT1_MOUSE	Slc16a1	1	3.44582	4.99308e-05	0.000153491
sp|P54103|DNJC2_MOUSE	Dnajc2	1	3.78544	2.34813e-07	1.39211e-06
sp|P54729|NUB1_MOUSE	Nub1	1	-0.172251	0.574281	0.577762
sp|P54823|DDX6_MOUSE	Ddx6	2	2.41022	0.00134001	0.00225144
sp|P55096|ABCD3_MOUSE	Abcd3	2	2.54297	0.0050954	0.00653661
sp|P55288|CAD11_MOUSE	Cdh11	4	2.99459	6.38582e-05	0.000191344
sp|P56135|ATPK_MOUSE	Atp5j2	2	2.5332	0.00351467	0.00483778
sp|P56183|RRP1_MOUSE	Rrp1	2	2.50149	0.000758346	0.00144034
sp|P56213|ALR_MOUSE	Gfer	1	9.51031	2.92333e-27	1.21318e-24
sp|P56480|ATPB_MOUSE	Atp5b	8	2.76063	0.000296006	0.000690125
sp|P56564|EAA1_MOUSE	Slc1a3	3	2.58052	0.00889841	0.0105964
sp|P56959|FUS_MOUSE	Fus	3	3.18441	0.00069042	0.00133578
sp|P57722|PCBP3_MOUSE	Pcbp3	3	2.84753	0.00115329	0.00200677
sp|P57776|EF1D_MOUSE	Eef1d	2	2.89248	0.000415082	0.000911423
sp|P57780|ACTN4_MOUSE	Actn4	36	1.48242	0.0300943	0.0323972
sp|P58252|EF2_MOUSE	Eef2	2	3.16438	0.000328785	0.00075479
sp|P58771|TPM1_MOUSE	Tpm1	3	2.10348	0.005469	0.00696207
sp|P58802|TB10A_MOUSE	Tbc1d10a	2	8.05141	1.7121e-17	8.88152e-16
sp|P59326|YTHD1_MOUSE	Ythdf1	2	2.73059	0.000528822	0.00111402
sp|P59999|ARPC4_MOUSE	Arpc4	6	2.92021	0.00434642	0.00576283
sp|P60710|ACTB_MOUSE	Actb	35	2.36192	0.00273303	0.00399368
sp|P60824|CIRBP_MOUSE	Cirbp	5	2.01466	0.0183445	0.0201668
sp|P60867|RS20_MOUSE	Rps20	6	2.76081	0.00158507	0.00256454
sp|P61027|RAB10_MOUSE	Rab10	3	3.12592	8.56914e-05	0.000249558
sp|P61161|ARP2_MOUSE	Actr2	9	2.91269	0.00156463	0.00253688
sp|P61164|ACTZ_MOUSE	Actr1a	2	2.24557	0.00162221	0.00260432
sp|P61222|ABCE1_MOUSE	Abce1	2	2.0407	0.00278009	0.0040482
sp|P61255|RL26_MOUSE	Rpl26	13	2.49278	0.00204326	0.0031168
sp|P61358|RL27_MOUSE	Rpl27	11	2.74888	0.00043446	0.000948953
sp|P61514|RL37A_MOUSE	Rpl37a	5	2.7854	0.00128356	0.00218759
sp|P61750|ARF4_MOUSE	Arf4	1	3.11222	0.000388872	0.000874607
sp|P62046|LRCH1_MOUSE	Lrch1	2	2.59754	0.000766816	0.00144979
sp|P62082|RS7_MOUSE	Rps7	4	2.06451	0.00497913	0.00642718
sp|P62137|PP1A_MOUSE	Ppp1ca	12	2.24191	0.0155791	0.0173565
sp|P62141|PP1B_MOUSE	Ppp1cb	4	1.13518	0.10114	0.104801
sp|P62204|CALM_MOUSE	Calm1	12	2.02926	0.00937003	0.0110785
sp|P62242|RS8_MOUSE	Rps8	19	2.75022	0.00132133	0.00222907
sp|P62245|RS15A_MOUSE	Rps15a	5	2.7179	0.00114859	0.00200358
sp|P62264|RS14_MOUSE	Rps14	8	2.54304	0.00149647	0.00246975
sp|P62267|RS23_MOUSE	Rps23	7	2.76284	0.000626512	0.00127141
sp|P62270|RS18_MOUSE	Rps18	15	1.60565	0.0481912	0.0510188
sp|P62274|RS29_MOUSE	Rps29	4	1.37488	0.122067	0.125702
sp|P62281|RS11_MOUSE	Rps11	19	2.6703	0.00198327	0.00305588
sp|P62301|RS13_MOUSE	Rps13	7	2.68496	0.00151161	0.00247952
sp|P62305|RUXE_MOUSE	Snrpe	2	4.45317	1.24628e-08	9.07377e-08
sp|P62307|RUXF_MOUSE	Snrpf	1	8.9941	1.70189e-30	1.41256e-27
sp|P62317|SMD2_MOUSE	Snrpd2	3	5.03756	1.37713e-11	1.70599e-10
sp|P62320|SMD3_MOUSE	Snrpd3	1	3.96298	1.09963e-07	7.1304e-07
sp|P62702|RS4X_MOUSE	Rps4x	13	2.93071	0.000680438	0.00132574
sp|P62717|RL18A_MOUSE	Rpl18a	15	2.90196	0.000145003	0.000383288
sp|P62751|RL23A_MOUSE	Rpl23a	9	2.27589	0.00310861	0.00441051
sp|P62754|RS6_MOUSE	Rps6	14	2.37927	0.00110146	0.00195344
sp|P62806|H4_MOUSE	Hist1h4a	10	2.17327	0.00556254	0.00707027
sp|P62814|VATB2_MOUSE	Atp6v1b2	2	3.36715	0.00147978	0.00245152
sp|P62827|RAN_MOUSE	Ran	4	2.07906	0.0141333	0.0158952
sp|P62830|RL23_MOUSE	Rpl23	7	2.55783	0.000815969	0.00152879
sp|P62849|RS24_MOUSE	Rps24	5	1.46932	0.0448023	0.0475523
sp|P62852|RS25_MOUSE	Rps25	8	2.52828	0.000969745	0.00174976
sp|P62855|RS26_MOUSE	Rps26	3	2.6465	0.000571365	0.00118855
sp|P62862|RS30_MOUSE	Fau	3	1.72775	0.0512254	0.0540929
sp|P62874|GBB1_MOUSE	Gnb1	3	3.1981	0.000148722	0.000390631
sp|P62900|RL31_MOUSE	Rpl31	4	2.59912	0.00301218	0.00431054
sp|P62908|RS3_MOUSE	Rps3	20	3.03883	0.000608658	0.0012443
sp|P62911|RL32_MOUSE	Rpl32	3	3.39511	1.19716e-05	4.6216e-05
sp|P62918|RL8_MOUSE	Rpl8	10	2.38115	0.00187856	0.00293083
sp|P62960|YBOX1_MOUSE	Ybx1	14	2.7818	0.000391992	0.000874607
sp|P63017|HSP7C_MOUSE	Hspa8	9	2.4265	0.00624958	0.00782375
sp|P63038|CH60_MOUSE	Hspd1	10	2.01805	0.00413417	0.0055434
sp|P63087|PP1G_MOUSE	Ppp1cc	3	1.64418	0.0690792	0.0723936
sp|P63094|GNAS2_MOUSE	Gnas	2	2.28804	0.0102686	0.0119368
sp|P63101|1433Z_MOUSE	Ywhaz	2	2.53493	0.0190038	0.020864
sp|P63260|ACTG_MOUSE	Actg1	1	2.01696	4.0164e-05	0.000130219
sp|P63276|RS17_MOUSE	Rps17	2	3.41597	1.50061e-05	5.60148e-05
sp|P63323|RS12_MOUSE	Rps12	1	2.93029	0.000252567	0.000609391
sp|P63325|RS10_MOUSE	Rps10	7	2.27924	0.00976363	0.0114644
sp|P67984|RL22_MOUSE	Rpl22	2	1.87562	0.0256629	0.0276985
sp|P68033|ACTC_MOUSE	Actc1	3	2.48708	0.000845658	0.00156677
sp|P68254|1433T_MOUSE	Ywhaq	1	2.94956	0.00039335	0.000875282
sp|P68372|TBB4B_MOUSE	Tubb4b	12	1.83174	0.0475946	0.0504515
sp|P68433|H31_MOUSE	Hist1h3a	8	1.91093	0.00960064	0.0113189
sp|P70168|IMB1_MOUSE	Kpnb1	1	3.10754	8.06642e-05	0.000237416
sp|P70388|RAD50_MOUSE	Rad50	1	3.65961	1.41827e-05	5.32652e-05
sp|P80317|TCPZ_MOUSE	Cct6a	2	3.82207	8.60659e-06	3.48462e-05
sp|P80318|TCPG_MOUSE	Cct3	1	2.77632	0.00128776	0.00219004
sp|P83882|RL36A_MOUSE	Rpl36a	10	2.57052	0.000664956	0.00130476
sp|P84091|AP2M1_MOUSE	Ap2m1	2	4.13898	1.67043e-07	1.01946e-06
sp|P84099|RL19_MOUSE	Rpl19	10	2.7561	0.000695654	0.00134277
sp|P97315|CSRP1_MOUSE	Csrp1	2	2.44484	0.00291536	0.00420826
sp|P97351|RS3A_MOUSE	Rps3a	22	2.64133	0.000531259	0.00111632
sp|P97376|FRG1_MOUSE	Frg1	2	4.14346	1.16044e-07	7.40898e-07
sp|P97379|G3BP2_MOUSE	G3bp2	4	2.67277	0.000135081	0.000362838
sp|P97434|MPRIP_MOUSE	Mprip	32	1.92269	0.00671319	0.00832878
sp|P97447|FHL1_MOUSE	Fhl1	1	1.98375	0.00743617	0.00908628
sp|P97461|RS5_MOUSE	Rps5	11	2.58173	0.00212377	0.00318757
sp|P97820|M4K4_MOUSE	Map4k4	14	2.5386	0.000753248	0.00143394
sp|P97855|G3BP1_MOUSE	G3bp1	8	2.73417	0.000468037	0.00100121
sp|P97863|NFIB_MOUSE	Nfib	2	3.45107	5.61137e-06	2.38843e-05
sp|P99024|TBB5_MOUSE	Tubb5	2	2.8304	0.00152212	0.00248693
sp|P99027|RLA2_MOUSE	Rplp2	2	2.32101	0.00338841	0.0046873
sp|Q01237|HMDH_MOUSE	Hmgcr	2	3.81812	2.42595e-06	1.13759e-05
sp|Q01320|TOP2A_MOUSE	Top2a	4	2.1506	0.00334481	0.00465803
sp|Q02257|PLAK_MOUSE	Jup	4	2.37503	0.0232853	0.0252622
sp|Q03141|MARK3_MOUSE	Mark3	12	2.11866	0.00545549	0.00695554
sp|Q03265|ATPA_MOUSE	Atp5a1	13	2.5836	0.00224497	0.00333929
sp|Q04447|KCRB_MOUSE	Ckb	11	-1.02572	0.289458	0.293705
sp|Q04750|TOP1_MOUSE	Top1	4	1.18204	0.228777	0.233848
sp|Q05512|MARK2_MOUSE	Mark2	4	2.06939	0.00684017	0.00847365
sp|Q05D44|IF2P_MOUSE	Eif5b	1	2.10779	0.00798502	0.00966118
sp|Q06185|ATP5I_MOUSE	Atp5i	1	2.53397	0.00507695	0.00652302
sp|Q08509|EPS8_MOUSE	Eps8	14	1.44949	0.055984	0.0589679
sp|Q0GNC1|INF2_MOUSE	Inf2	4	1.90499	0.0105341	0.0122113
sp|Q0VGY8|TANC1_MOUSE	Tanc1	9	2.49165	0.00198816	0.00305588
sp|Q2KN98|CYTSA_MOUSE	Specc1l	34	2.12943	0.00504404	0.00649078
sp|Q3THK3|T2FA_MOUSE	Gtf2f1	1	1.70472	0.0341615	0.0365859
sp|Q3TIV5|ZC3HF_MOUSE	Zc3h15	1	3.346	0.000104392	0.000288818
sp|Q3TIX9|SNUT2_MOUSE	Usp39	2	4.33444	1.05875e-09	9.05944e-09
sp|Q3TKT4|SMCA4_MOUSE	Smarca4	5	2.78446	4.6252e-05	0.000144865
sp|Q3TLH4|PRC2C_MOUSE	Prrc2c	12	2.90684	0.000520229	0.0010987
sp|Q3TVI8|PBIP1_MOUSE	Pbxip1	4	1.56306	0.0746168	0.078
sp|Q3TWW8|SRSF6_MOUSE	Srsf6	10	2.94124	9.22466e-05	0.000264016
sp|Q3UH68|LIMC1_MOUSE	Limch1	23	2.20125	0.00411181	0.00553129
sp|Q3UHD6|SNX27_MOUSE	Snx27	1	1.70847	0.0162506	0.0180321
sp|Q3UHI0|CCSE2_MOUSE	Ccser2	1	2.28917	0.00591867	0.0074658
sp|Q3UIL6|PKHA7_MOUSE	Plekha7	3	2.33718	0.000794019	0.00149441
sp|Q3UKJ7|SMU1_MOUSE	Smu1	3	4.94704	6.08509e-12	8.01687e-11
sp|Q3UMF0|COBL1_MOUSE	Cobll1	4	2.50824	0.00194475	0.00301398
sp|Q3UMG5|LRCH2_MOUSE	Lrch2	6	2.03788	0.0123354	0.0140251
sp|Q3UMT1|PP12C_MOUSE	Ppp1r12c	16	2.14236	0.00983767	0.0115004
sp|Q3UMY5|EMAL4_MOUSE	Eml4	2	2.31027	0.00140125	0.00234011
sp|Q3UPH7|ARH40_MOUSE	Arhgef40	3	2.15672	0.00645989	0.00806272
sp|Q3UTJ2|SRBS2_MOUSE	Sorbs2	3	1.64255	0.0313683	0.033725
sp|Q3UZ39|LRRF1_MOUSE	Lrrfip1	12	2.06271	0.0111224	0.0128394
sp|Q3V1H1|CKAP2_MOUSE	Ckap2	2	1.58143	0.0416008	0.0443814
sp|Q4FK66|PR38A_MOUSE	Prpf38a	2	1.84649	0.00638056	0.0079757
sp|Q4VA53|PDS5B_MOUSE	Pds5b	3	3.46894	1.93456e-05	6.91011e-05
sp|Q52KF3|SPIR1_MOUSE	Spire1	3	1.99342	0.00772816	0.00937773
sp|Q52KI8|SRRM1_MOUSE	Srrm1	9	2.58179	0.000600806	0.00123433
sp|Q569Z5|DDX46_MOUSE	Ddx46	4	1.90352	0.00488803	0.00634909
sp|Q569Z6|TR150_MOUSE	Thrap3	25	2.99932	8.13931e-05	0.000238715
sp|Q5DU25|IQEC2_MOUSE	Iqsec2	2	3.63825	1.60179e-06	7.68491e-06
sp|Q5F2E7|NUFP2_MOUSE	Nufip2	8	2.95969	6.08049e-05	0.000184865
sp|Q5PR69|K1211_MOUSE	Kiaa1211	34	1.92263	0.0142306	0.015983
sp|Q5SFM8|RBM27_MOUSE	Rbm27	2	3.46021	2.89349e-06	1.32685e-05
sp|Q5SNZ0|GRDN_MOUSE	Ccdc88a	5	2.60406	0.00121248	0.00208789
sp|Q5SRX1|TM1L2_MOUSE	Tom1l2	10	2.24041	0.00934166	0.0110607
sp|Q5SV80|MYO19_MOUSE	Myo19	2	1.76255	0.0138931	0.0156462
sp|Q5SVQ0|KAT7_MOUSE	Kat7	1	2.41729	0.000654352	0.00130476
sp|Q5SW75|SSH2_MOUSE	Ssh2	2	2.4435	0.0020537	0.0031168
sp|Q5SXY1|CYTSB_MOUSE	Specc1	49	1.89106	0.00826758	0.00991632
sp|Q60575|KIF1B_MOUSE	Kif1b	1	2.9593	0.0006585	0.00130476
sp|Q60598|SRC8_MOUSE	Cttn	22	1.82621	0.0112544	0.0129738
sp|Q60634|FLOT2_MOUSE	Flot2	6	0.422874	0.744646	0.748253
sp|Q60715|P4HA1_MOUSE	P4ha1	5	-2.66292	0.000663207	0.00130476
sp|Q60722|ITF2_MOUSE	Tcf4	1	2.60257	0.000581893	0.00120442
sp|Q60838|DVL2_MOUSE	Dvl2	1	2.44505	0.00205408	0.0031168
sp|Q60875|ARHG2_MOUSE	Arhgef2	2	2.67345	0.000390944	0.000874607
sp|Q60930|VDAC2_MOUSE	Vdac2	3	2.40738	0.00442589	0.0058495
sp|Q61074|PPM1G_MOUSE	Ppm1g	1	2.8354	1.5711e-07	9.73145e-07
sp|Q61382|TRAF4_MOUSE	Traf4	2	2.3926	0.00112521	0.00198286
sp|Q61464|ZN638_MOUSE	Znf638	2	3.5538	9.10723e-06	3.65169e-05
sp|Q61553|FSCN1_MOUSE	Fscn1	6	2.48937	0.0112849	0.0129883
sp|Q61656|DDX5_MOUSE	Ddx5	25	2.93638	0.000119861	0.000327252
sp|Q61686|CBX5_MOUSE	Cbx5	1	2.54461	0.00149933	0.00246975
sp|Q61781|K1C14_MOUSE	Krt14	1	1.39144	0.214069	0.219084
sp|Q61792|LASP1_MOUSE	Lasp1	2	1.34252	0.0633407	0.0664637
sp|Q61879|MYH10_MOUSE	Myh10	79	2.61153	0.000851875	0.00157474
sp|Q61937|NPM_MOUSE	Npm1	8	2.20183	0.00324923	0.00454017
sp|Q62093|SRSF2_MOUSE	Srsf2	7	2.80493	0.000584806	0.00120744
sp|Q62167|DDX3X_MOUSE	Ddx3x	17	2.76107	0.000365142	0.000825797
sp|Q62203|SF3A2_MOUSE	Sf3a2	2	7.27659	2.218e-22	2.30118e-20
sp|Q62261|SPTB2_MOUSE	Sptbn1	46	2.3877	0.0039233	0.00530349
sp|Q62318|TIF1B_MOUSE	Trim28	2	3.08282	0.000154755	0.000403921
sp|Q62376|RU17_MOUSE	Snrnp70	4	2.73566	0.000274002	0.000651637
sp|Q62418|DBNL_MOUSE	Dbnl	4	2.04881	0.00745076	0.00908628
sp|Q640M1|UT14A_MOUSE	Utp14a	2	1.85733	0.0420398	0.0447921
sp|Q640R3|HECAM_MOUSE	Hepacam	4	2.68747	0.00060688	0.00124373
sp|Q64331|MYO6_MOUSE	Myo6	56	2.30736	0.00309349	0.00440061
sp|Q64523|H2A2C_MOUSE	Hist2h2ac	2	3.72779	0.00213276	0.00319528
sp|Q66JT5|TPGS2_MOUSE	Tpgs2	2	2.82424	0.00303594	0.00433706
sp|Q68FD5|CLH1_MOUSE	Cltc	3	3.05046	2.6796e-05	9.15255e-05
sp|Q68FF7|SLAI1_MOUSE	Slain1	2	2.77977	0.00154306	0.00251619
sp|Q68FH0|PKP4_MOUSE	Pkp4	3	3.79582	8.27682e-07	4.2936e-06
sp|Q69Z38|PEAK1_MOUSE	Peak1	6	2.01456	0.00727146	0.00890165
sp|Q69ZL1|FGD6_MOUSE	Fgd6	3	1.52283	0.0429132	0.045664
sp|Q69ZQ2|ISY1_MOUSE	Isy1	2	5.46435	3.49902e-13	5.4796e-12
sp|Q6A026|PDS5A_MOUSE	Pds5a	3	2.95876	1.52377e-05	5.6461e-05
sp|Q6A065|CE170_MOUSE	Cep170	2	4.54508	5.98598e-09	4.68713e-08
sp|Q6DFV3|RHG21_MOUSE	Arhgap21	29	1.76713	0.00929289	0.0110286
sp|Q6DFW4|NOP58_MOUSE	Nop58	4	2.05546	0.0069253	0.00855358
sp|Q6IRU2|TPM4_MOUSE	Tpm4	7	2.04335	0.00611155	0.00767411
sp|Q6NV72|WDCP_MOUSE	Wdcp	1	2.42982	0.00748022	0.00910349
sp|Q6NV83|SR140_MOUSE	U2surp	16	1.96325	0.00976549	0.0114644
sp|Q6NVF9|CPSF6_MOUSE	Cpsf6	2	2.43349	0.000331197	0.000757282
sp|Q6P542|ABCF1_MOUSE	Abcf1	4	2.59488	0.00255184	0.00374209
sp|Q6P5F9|XPO1_MOUSE	Xpo1	1	3.21964	0.000139568	0.000372481
sp|Q6P5H2|NEST_MOUSE	Nes	62	1.72499	0.0233142	0.0252622
sp|Q6P9S0|MTSSL_MOUSE	Mtss1l	5	2.22884	0.00415614	0.00555951
sp|Q6PAM1|TXLNA_MOUSE	Txlna	2	2.19215	0.00786214	0.00952639
sp|Q6PDH0|PHLB1_MOUSE	Phldb1	18	2.02377	0.00704593	0.00867674
sp|Q6PDN3|MYLK_MOUSE	Mylk	4	2.18221	0.00412685	0.00554253
sp|Q6PGN3|DCLK2_MOUSE	Dclk2	6	2.44585	0.00175168	0.00276932
sp|Q6R891|NEB2_MOUSE	Ppp1r9b	36	1.73411	0.0245894	0.0266091
sp|Q6RHR9|MAGI1_MOUSE	Magi1	4	2.06805	0.00315953	0.00445231
sp|Q6Y7W8|GGYF2_MOUSE	Gigyf2	4	1.80906	0.0219029	0.0239203
sp|Q6ZQ03|FNBP4_MOUSE	Fnbp4	1	2.32868	0.00151534	0.00248074
sp|Q6ZWM4|LSM8_MOUSE	Lsm8	1	9.09586	1.86484e-26	5.15939e-24
sp|Q6ZWN5|RS9_MOUSE	Rps9	10	2.98185	0.00029435	0.000689059
sp|Q6ZWU9|RS27_MOUSE	Rps27	4	2.75153	0.00111445	0.00197226
sp|Q6ZWV7|RL35_MOUSE	Rpl35	5	2.49381	0.002008	0.00306932
sp|Q6ZWX6|IF2A_MOUSE	Eif2s1	1	2.15425	0.00244721	0.00361421
sp|Q6ZWY3|RS27L_MOUSE	Rps27l	3	2.48588	0.00259254	0.00379508
sp|Q76I79|SSH1_MOUSE	Ssh1	5	2.021	0.00377086	0.00512244
sp|Q78PY7|SND1_MOUSE	Snd1	4	2.68395	0.00115913	0.00201272
sp|Q791T5|MTCH1_MOUSE	Mtch1	2	2.66404	0.000557363	0.00116527
sp|Q791V5|MTCH2_MOUSE	Mtch2	2	4.09553	1.62529e-07	9.99251e-07
sp|Q7TMM9|TBB2A_MOUSE	Tubb2a	2	3.40481	3.38358e-05	0.00011307
sp|Q7TMY4|THOC7_MOUSE	Thoc7	1	4.20348	5.5161e-07	3.03203e-06
sp|Q7TNC4|LC7L2_MOUSE	Luc7l2	5	2.46659	0.00194122	0.00301398
sp|Q7TPV4|MBB1A_MOUSE	Mybbp1a	9	2.27803	0.00238603	0.00353644
sp|Q7TQH0|ATX2L_MOUSE	Atxn2l	9	2.71576	0.000226591	0.000558072
sp|Q7TSC1|PRC2A_MOUSE	Prrc2a	17	2.41943	0.00172803	0.00274764
sp|Q7TSF1|DSG1B_MOUSE	Dsg1b	1	0.754958	0.993372	0.993372
sp|Q7TT50|MRCKB_MOUSE	Cdc42bpb	2	2.07707	0.00485712	0.00632229
sp|Q80SW1|SAHH2_MOUSE	Ahcyl1	2	2.63088	0.000943593	0.00171439
sp|Q80SY4|MIB1_MOUSE	Mib1	1	2.72459	9.55676e-05	0.000271648
sp|Q80TH2|ERBIN_MOUSE	Erbin	2	3.20096	2.53366e-06	1.17483e-05
sp|Q80TV8|CLAP1_MOUSE	Clasp1	6	2.61911	0.00059014	0.00121543
sp|Q80UG5|SEPT9_MOUSE	septin09	2	2.96054	0.00182065	0.00285468
sp|Q80WJ7|LYRIC_MOUSE	Mtdh	5	2.786	0.000650885	0.00130476
sp|Q80WV3|CHST2_MOUSE	Chst2	2	3.68822	1.56837e-05	5.75993e-05
sp|Q80X50|UBP2L_MOUSE	Ubap2l	5	2.82691	0.000147697	0.00038917
sp|Q80XI3|IF4G3_MOUSE	Eif4g3	1	5.95076	9.3302e-11	9.68008e-10
sp|Q80XP8|FA76B_MOUSE	Fam76b	1	2.29283	0.001249	0.00213747
sp|Q80Y17|L2GL1_MOUSE	Llgl1	3	2.3061	0.00108812	0.00193392
sp|Q80Y19|RHGBA_MOUSE	Arhgap11a	2	2.20996	0.0104861	0.0121726
sp|Q80YT7|MYOME_MOUSE	Pde4dip	3	2.36684	0.00198532	0.00305588
sp|Q8BFR5|EFTU_MOUSE	Tufm	4	2.45949	0.00176139	0.00277938
sp|Q8BFU2|H2A3_MOUSE	Hist3h2a	8	2.09879	0.0114873	0.0131873
sp|Q8BFZ9|ERLN2_MOUSE	Erlin2	2	2.5937	0.00420896	0.00560744
sp|Q8BG81|PDIP3_MOUSE	Poldip3	14	1.02415	0.168431	0.173231
sp|Q8BG95|MYPT2_MOUSE	Ppp1r12b	25	1.84088	0.00819574	0.00985864
sp|Q8BGA9|OXA1L_MOUSE	Oxa1l	1	2.92649	0.000115014	0.000316099
sp|Q8BGD9|IF4B_MOUSE	Eif4b	5	2.66768	0.000185082	0.00046978
sp|Q8BGS1|E41L5_MOUSE	Epb41l5	3	2.41035	0.0021644	0.00323685
sp|Q8BGY2|IF5A2_MOUSE	Eif5a2	1	3.1083	1.13277e-05	4.41406e-05
sp|Q8BGZ2|F168A_MOUSE	Fam168a	1	1.79168	0.0165802	0.0183732
sp|Q8BH44|COR2B_MOUSE	Coro2b	18	2.90155	0.000116583	0.000319353
sp|Q8BH59|CMC1_MOUSE	Slc25a12	2	3.54441	7.26085e-06	2.99826e-05
sp|Q8BHR8|CK049_MOUSE	NA	1	2.07127	0.000983429	0.00176677
sp|Q8BI72|CARF_MOUSE	Cdkn2aip	3	3.3793	5.38783e-06	2.31705e-05
sp|Q8BIE6|FRM4A_MOUSE	Frmd4a	3	2.91346	0.000413421	0.000910183
sp|Q8BJA3|HMBX1_MOUSE	Hmbox1	2	6.71848	7.05249e-20	4.18112e-18
sp|Q8BJW6|EIF2A_MOUSE	Eif2a	3	2.5705	0.00076354	0.00144689
sp|Q8BK63|KC1A_MOUSE	Csnk1a1	1	3.05253	4.06332e-05	0.000130423
sp|Q8BK67|RCC2_MOUSE	Rcc2	6	2.47395	0.000686629	0.00133155
sp|Q8BKX1|BAIP2_MOUSE	Baiap2	10	1.94618	0.0230866	0.0250809
sp|Q8BL06|UBP54_MOUSE	Usp54	4	2.00802	0.00745513	0.00908628
sp|Q8BL97|SRSF7_MOUSE	Srsf7	3	3.67778	4.38372e-06	1.96675e-05
sp|Q8BLK3|LSAMP_MOUSE	Lsamp	2	3.30976	9.06422e-05	0.000260322
sp|Q8BMK4|CKAP4_MOUSE	Ckap4	4	2.71182	0.000663476	0.00130476
sp|Q8BMS1|ECHA_MOUSE	Hadha	5	1.90408	0.0217779	0.0238151
sp|Q8BQ30|PPR18_MOUSE	Ppp1r18	24	1.72605	0.022446	0.024449
sp|Q8BRT1|CLAP2_MOUSE	Clasp2	14	2.09957	0.00449937	0.00590899
sp|Q8BRV5|K1671_MOUSE	Kiaa1671	2	1.86262	0.0176959	0.0195055
sp|Q8BTM8|FLNA_MOUSE	Flna	28	2.72386	0.000501448	0.00106489
sp|Q8BTV2|CPSF7_MOUSE	Cpsf7	3	3.05435	4.87697e-05	0.000150479
sp|Q8BVU0|LRCH3_MOUSE	Lrch3	10	2.11117	0.00802197	0.00967767
sp|Q8BVY0|RL1D1_MOUSE	Rsl1d1	13	2.28484	0.00336634	0.00468016
sp|Q8BWW4|LARP4_MOUSE	Larp4	3	2.99287	0.000187921	0.00047265
sp|Q8BXK8|AGAP1_MOUSE	Agap1	2	2.58938	0.00210425	0.003164
sp|Q8BYK6|YTHD3_MOUSE	Ythdf3	1	1.8062	0.0107908	0.0124914
sp|Q8C0D4|RHG12_MOUSE	Arhgap12	7	1.91267	0.00593663	0.0074771
sp|Q8C0T5|SI1L1_MOUSE	Sipa1l1	26	1.84561	0.00711469	0.00874844
sp|Q8C4S8|DEN2A_MOUSE	Dennd2a	28	1.95487	0.0136211	0.0153608
sp|Q8C7M3|TRIM9_MOUSE	Trim9	3	2.16655	0.0058471	0.00739801
sp|Q8CAF4|NHSL1_MOUSE	Nhsl1	4	1.79669	0.00802104	0.00967767
sp|Q8CAQ8|MIC60_MOUSE	Immt	27	2.41317	0.00194963	0.00301398
sp|Q8CBY8|DCTN4_MOUSE	Dctn4	8	2.29232	0.00400743	0.00539963
sp|Q8CCF0|PRP31_MOUSE	Prpf31	3	3.66023	8.43935e-07	4.35072e-06
sp|Q8CCJ4|AMER2_MOUSE	Amer2	2	2.43366	0.000670096	0.00131174
sp|Q8CG19|LTBP1_MOUSE	Ltbp1	1	-1.52737	0.0895084	0.0932145
sp|Q8CG47|SMC4_MOUSE	Smc4	3	2.87457	0.000113073	0.000311796
sp|Q8CG48|SMC2_MOUSE	Smc2	4	2.71343	0.000717786	0.00138228
sp|Q8CGB3|UACA_MOUSE	Uaca	15	2.47	0.00200055	0.00306531
sp|Q8CGC6|RBM28_MOUSE	Rbm28	2	1.87963	0.018098	0.0199222
sp|Q8CH02|SUGP1_MOUSE	Sugp1	2	6.75657	7.23951e-23	1.00147e-20
sp|Q8CH09|SUGP2_MOUSE	Sugp2	2	3.11616	0.00930125	0.0110286
sp|Q8CI08|SLAI2_MOUSE	Slain2	3	1.96581	0.0336721	0.0361084
sp|Q8CI51|PDLI5_MOUSE	Pdlim5	7	2.00053	0.0159768	0.017752
sp|Q8CIE6|COPA_MOUSE	Copa	3	3.03066	6.95772e-05	0.000206986
sp|Q8CIW5|PEO1_MOUSE	Peo1	2	5.2553	1.54932e-12	2.17956e-11
sp|Q8CJF7|ELYS_MOUSE	Ahctf1	1	2.45344	0.00217678	0.00324951
sp|Q8JZK9|HMCS1_MOUSE	Hmgcs1	1	2.67619	0.00174253	0.00276011
sp|Q8JZM7|CDC73_MOUSE	Cdc73	1	2.24263	0.00130401	0.00220884
sp|Q8JZP9|GA2L1_MOUSE	Gas2l1	4	2.35238	0.0112983	0.0129883
sp|Q8JZQ9|EIF3B_MOUSE	Eif3b	2	2.39299	0.00107524	0.00191513
sp|Q8JZU0|NUD13_MOUSE	Nudt13	1	4.8046	1.50935e-08	1.08936e-07
sp|Q8JZU2|TXTP_MOUSE	Slc25a1	2	2.93417	0.00072467	0.00139215
sp|Q8K0D0|CDK17_MOUSE	Cdk17	1	2.05472	0.000186167	0.000471092
sp|Q8K194|SNR27_MOUSE	Snrnp27	3	1.33347	0.0610153	0.0641859
sp|Q8K297|GT251_MOUSE	Colgalt1	6	-2.47292	0.00113934	0.00199927
sp|Q8K298|ANLN_MOUSE	Anln	1	1.83868	0.00288437	0.00417806
sp|Q8K2H2|OTU6B_MOUSE	Otud6b	1	1.72547	0.0952905	0.0991117
sp|Q8K363|DDX18_MOUSE	Ddx18	3	2.74778	0.000391859	0.000874607
sp|Q8K4G5|ABLM1_MOUSE	Ablim1	2	1.65548	0.0229941	0.0250133
sp|Q8K4L0|DDX54_MOUSE	Ddx54	1	2.60183	0.000263109	0.000631157
sp|Q8K4L3|SVIL_MOUSE	Svil	43	1.99545	0.0115538	0.0132454
sp|Q8QZY9|SF3B4_MOUSE	Sf3b4	2	5.7758	1.56709e-16	5.9122e-15
sp|Q8R0A0|T2FB_MOUSE	Gtf2f2	1	2.37182	3.45516e-05	0.000114711
sp|Q8R0X7|SGPL1_MOUSE	Sgpl1	3	3.1061	0.000365056	0.000825797
sp|Q8R1A4|DOCK7_MOUSE	Dock7	44	2.1081	0.00764249	0.00928736
sp|Q8R1F0|L10K_MOUSE	D8Ertd738e	3	0.354192	0.467309	0.471283
sp|Q8R323|RFC3_MOUSE	Rfc3	1	3.72299	2.75157e-06	1.26878e-05
sp|Q8R3F5|FABD_MOUSE	Mcat	2	1.36815	0.279574	0.28423
sp|Q8R3N6|THOC1_MOUSE	Thoc1	1	2.4513	2.2084e-05	7.76684e-05
sp|Q8R3V6|CUED1_MOUSE	Cuedc1	2	2.07689	0.0129055	0.0146134
sp|Q8R3Y5|CS047_MOUSE	NA	2	2.85574	0.000183603	0.000468895
sp|Q8R422|CD109_MOUSE	Cd109	1	2.99407	0.00282766	0.00411026
sp|Q8R4U7|LUZP1_MOUSE	Luzp1	5	2.07759	0.0035733	0.00490222
sp|Q8VBT0|TMX1_MOUSE	Tmx1	1	2.38795	0.000307429	0.000712755
sp|Q8VBX6|MPDZ_MOUSE	Mpdz	5	2.98095	0.000229635	0.000563896
sp|Q8VC31|CCDC9_MOUSE	Ccdc9	3	3.68187	4.99184e-11	5.31183e-10
sp|Q8VC70|RBMS2_MOUSE	Rbms2	1	4.95038	1.50498e-05	5.60148e-05
sp|Q8VD75|HIP1_MOUSE	Hip1	3	3.1222	0.000166168	0.000426995
sp|Q8VDD5|MYH9_MOUSE	Myh9	192	2.92029	0.000132352	0.000357826
sp|Q8VDJ3|VIGLN_MOUSE	Hdlbp	5	2.95116	0.000326733	0.000753302
sp|Q8VDN2|AT1A1_MOUSE	Atp1a1	3	3.48332	1.53684e-05	5.66922e-05
sp|Q8VDP4|CCAR2_MOUSE	Ccar2	2	5.69507	6.70695e-13	1.00411e-11
sp|Q8VEM8|MPCP_MOUSE	Slc25a3	3	3.00515	0.000294718	0.000689059
sp|Q8VH51|RBM39_MOUSE	Rbm39	2	3.3969	8.81678e-05	0.00025498
sp|Q8VHG2|AMOT_MOUSE	Amot	20	1.798	0.00985951	0.0115097
sp|Q8VHJ5|MARK1_MOUSE	Mark1	2	2.00802	0.0152083	0.0169891
sp|Q8VIJ6|SFPQ_MOUSE	Sfpq	35	2.97996	0.00013476	0.000362838
sp|Q91V61|SFXN3_MOUSE	Sfxn3	4	2.85286	0.000943948	0.00171439
sp|Q91VE6|MK67I_MOUSE	Nifk	5	2.44106	0.0033875	0.0046873
sp|Q91VJ5|PQBP1_MOUSE	Pqbp1	2	5.32832	4.28935e-12	5.7422e-11
sp|Q91VN1|ZNF24_MOUSE	Znf24	2	2.49453	0.000980173	0.00176474
sp|Q91VN6|DDX41_MOUSE	Ddx41	1	5.08527	1.83788e-11	2.14851e-10
sp|Q91VR2|ATPG_MOUSE	Atp5c1	4	2.81129	0.00075106	0.00143306
sp|Q91VX2|UBAP2_MOUSE	Ubap2	2	2.75205	0.00057886	0.00120113
sp|Q91W18|TDRD3_MOUSE	Tdrd3	4	2.84755	0.00063928	0.001291
sp|Q91W92|BORG5_MOUSE	Cdc42ep1	2	3.12964	0.000283407	0.000670165
sp|Q91WK0|LRRF2_MOUSE	Lrrfip2	9	2.70681	0.00121935	0.00209536
sp|Q91YK0|LRC49_MOUSE	Lrrc49	2	2.43079	0.00169964	0.00271288
sp|Q91YR1|TWF1_MOUSE	Twf1	9	2.24506	0.00980662	0.0114965
sp|Q91YU6|LZTS2_MOUSE	Lzts2	8	2.04824	0.00512353	0.00656207
sp|Q91YU8|SSF1_MOUSE	Ppan	1	2.79513	0.00444865	0.00586093
sp|Q91Z67|SRGP2_MOUSE	Srgap2	22	2.44217	0.00118571	0.00205028
sp|Q91Z96|BMP2K_MOUSE	Bmp2k	1	1.5695	0.0119697	0.0136468
sp|Q91ZU6|DYST_MOUSE	Dst	5	2.47098	0.000453415	0.000980039
sp|Q91ZW3|SMCA5_MOUSE	Smarca5	6	2.89213	0.000161185	0.000415477
sp|Q920B9|SP16H_MOUSE	Supt16h	5	1.88597	0.0127056	0.0144185
sp|Q920L1|FADS1_MOUSE	Fads1	4	2.66104	0.000822881	0.00153481
sp|Q921E2|RAB31_MOUSE	Rab31	2	4.6621	1.2699e-06	6.27392e-06
sp|Q921F2|TADBP_MOUSE	Tardbp	2	3.83398	7.02625e-07	3.73833e-06
sp|Q921F4|HNRLL_MOUSE	Hnrnpll	2	4.41471	1.79638e-08	1.28534e-07
sp|Q921N6|DDX27_MOUSE	Ddx27	2	2.37128	0.00471434	0.00615236
sp|Q922B9|SSFA2_MOUSE	Ssfa2	7	2.12891	0.00364242	0.00497238
sp|Q922K7|NOP2_MOUSE	Nop2	5	2.53966	0.00123581	0.00211927
sp|Q922Q1|MARC2_MOUSE	Marc2	2	3.76893	5.8168e-06	2.46324e-05
sp|Q922Q8|LRC59_MOUSE	Lrrc59	3	3.196	0.000329197	0.00075479
sp|Q923D4|SF3B5_MOUSE	Sf3b5	2	5.90513	1.30513e-14	3.00906e-13
sp|Q925B0|PAWR_MOUSE	Pawr	4	1.8925	0.00726808	0.00890165
sp|Q925G2|CYBR1_MOUSE	Cybrd1	2	1.92998	0.0122787	0.0139798
sp|Q925H1|TRPS1_MOUSE	Trps1	2	4.80452	2.9961e-09	2.41433e-08
sp|Q925I1|ATAD3_MOUSE	Atad3	25	2.39507	0.00208547	0.00315289
sp|Q925N0|SFXN5_MOUSE	Sfxn5	1	1.81678	0.0335396	0.0360127
sp|Q99104|MYO5A_MOUSE	Myo5a	106	2.16175	0.00513106	0.00656207
sp|Q99JB2|STML2_MOUSE	Stoml2	1	2.81867	0.000477709	0.00101928
sp|Q99JF8|PSIP1_MOUSE	Psip1	9	2.339	0.00299748	0.00430145
sp|Q99JY9|ARP3_MOUSE	Actr3	5	2.69551	0.000198569	0.000496422
sp|Q99K43|PRC1_MOUSE	Prc1	2	3.17857	6.30793e-05	0.000190385
sp|Q99K48|NONO_MOUSE	Nono	25	2.92286	0.000197645	0.000495606
sp|Q99KI0|ACON_MOUSE	Aco2	2	2.24564	0.0050091	0.00645583
sp|Q99KW3|TARA_MOUSE	Triobp	8	1.68351	0.0289012	0.0311532
sp|Q99L45|IF2B_MOUSE	Eif2s2	1	2.96141	0.00045789	0.00098714
sp|Q99LJ0|CT2NL_MOUSE	Cttnbp2nl	10	1.8991	0.00826193	0.00991632
sp|Q99LX5|MMTA2_MOUSE	Mmtag2	2	5.94262	6.43115e-14	1.27092e-12
sp|Q99M28|RNPS1_MOUSE	Rnps1	2	5.19949	1.50493e-11	1.81028e-10
sp|Q99ME9|NOG1_MOUSE	Gtpbp4	2	2.44074	0.0065939	0.00819302
sp|Q99MN1|SYK_MOUSE	Kars	1	3.61366	5.58521e-05	0.000170431
sp|Q99MR6|SRRT_MOUSE	Srrt	2	3.09469	4.06982e-05	0.000130423
sp|Q99MS8|TPGS1_MOUSE	Tpgs1	2	2.51266	0.000684515	0.00133056
sp|Q99N87|RT05_MOUSE	Mrps5	1	0.943324	0.211939	0.217172
sp|Q99NH2|PARD3_MOUSE	Pard3	1	2.48996	0.00103014	0.00183875
sp|Q99PL5|RRBP1_MOUSE	Rrbp1	27	2.65094	0.000467887	0.00100121
sp|Q99PU8|DHX30_MOUSE	Dhx30	3	2.92397	0.000142278	0.000378297
sp|Q9CPQ1|COX6C_MOUSE	Cox6c	2	2.91276	0.000664524	0.00130476
sp|Q9CPR4|RL17_MOUSE	Rpl17	8	2.69612	0.000619991	0.00126126
sp|Q9CPS7|PNO1_MOUSE	Pno1	1	2.30422	0.00145046	0.00240777
sp|Q9CPW4|ARPC5_MOUSE	Arpc5	1	5.01343	4.90187e-07	2.71237e-06
sp|Q9CQ19|MYL9_MOUSE	Myl9	1	2.7714	0.000390525	0.000874607
sp|Q9CQF3|CPSF5_MOUSE	Nudt21	3	2.90041	0.000187142	0.000472122
sp|Q9CQI7|RU2B_MOUSE	Snrpb2	2	6.04017	9.23423e-16	2.73729e-14
sp|Q9CQL1|MGN2_MOUSE	Magohb	2	3.52589	3.20633e-06	1.45424e-05
sp|Q9CQQ7|AT5F1_MOUSE	Atp5f1	3	-0.372899	0.878693	0.881881
sp|Q9CQR2|RS21_MOUSE	Rps21	2	2.67418	0.000142659	0.000378297
sp|Q9CQS8|SC61B_MOUSE	Sec61b	2	2.12525	0.00246423	0.00363289
sp|Q9CR57|RL14_MOUSE	Rpl14	8	2.63618	0.000461432	0.000992198
sp|Q9CR62|M2OM_MOUSE	Slc25a11	2	3.74851	4.68151e-05	0.00014553
sp|Q9CRB2|NHP2_MOUSE	Nhp2	1	3.03022	4.58791e-06	2.02552e-05
sp|Q9CRB9|MIC19_MOUSE	Chchd3	17	2.17279	0.00495532	0.00640641
sp|Q9CRD2|EMC2_MOUSE	Emc2	1	3.6806	1.57605e-05	5.76264e-05
sp|Q9CSB4|PAR3L_MOUSE	Pard3b	3	2.92213	0.000209446	0.000520479
sp|Q9CU62|SMC1A_MOUSE	Smc1a	7	2.49541	0.00066282	0.00130476
sp|Q9CVB6|ARPC2_MOUSE	Arpc2	3	4.82028	4.32558e-08	2.9219e-07
sp|Q9CW03|SMC3_MOUSE	Smc3	4	2.88319	0.00044369	0.00096404
sp|Q9CWF2|TBB2B_MOUSE	Tubb2b	3	2.54769	0.000662822	0.00130476
sp|Q9CWK3|CD2B2_MOUSE	Cd2bp2	3	4.02561	9.41188e-09	7.03771e-08
sp|Q9CXS4|CENPV_MOUSE	Cenpv	5	2.78462	0.000726265	0.00139215
sp|Q9CXW4|RL11_MOUSE	Rpl11	7	2.93593	0.000256694	0.000617554
sp|Q9CY58|PAIRB_MOUSE	Serbp1	11	2.45244	0.00139361	0.00233205
sp|Q9CYH6|RRS1_MOUSE	Rrs1	3	2.56556	0.000736798	0.00140908
sp|Q9CYI4|LUC7L_MOUSE	Luc7l	1	3.58491	1.61241e-06	7.69138e-06
sp|Q9CYL5|GAPR1_MOUSE	Glipr2	2	2.25109	0.00380856	0.00515678
sp|Q9CYX7|RRP15_MOUSE	Rrp15	1	1.95746	0.00309633	0.00440061
sp|Q9CZ42|NNRD_MOUSE	Naxd	2	7.23488	1.64943e-21	1.36903e-19
sp|Q9CZ52|ANTR1_MOUSE	Antxr1	1	7.92993	1.39346e-17	7.71048e-16
sp|Q9CZM2|RL15_MOUSE	Rpl15	9	2.84956	0.000515404	0.00109129
sp|Q9CZX8|RS19_MOUSE	Rps19	12	2.40875	0.00191181	0.00297712
sp|Q9CZX9|EMC4_MOUSE	Emc4	1	2.21265	0.00428384	0.00568894
sp|Q9D0R4|DDX56_MOUSE	Ddx56	2	2.16698	0.00436879	0.00578324
sp|Q9D0R8|LSM12_MOUSE	Lsm12	2	3.3513	1.00002e-05	3.97136e-05
sp|Q9D0T1|NH2L1_MOUSE	Snu13	2	3.21558	0.00013168	0.000357196
sp|Q9D115|ZN706_MOUSE	Znf706	2	2.11269	0.00379504	0.00514687
sp|Q9D1I6|RM14_MOUSE	Mrpl14	5	0.55578	0.536251	0.540156
sp|Q9D1R9|RL34_MOUSE	Rpl34	8	2.66182	0.000563654	0.00117546
sp|Q9D4H4|AMOL1_MOUSE	Amotl1	16	1.96715	0.00608706	0.00765494
sp|Q9D4J1|EFHD1_MOUSE	Efhd1	9	2.50197	0.00655998	0.00816309
sp|Q9D6Z1|NOP56_MOUSE	Nop56	9	2.63158	0.00151119	0.00247952
sp|Q9D735|CS043_MOUSE	NA	3	4.82299	1.6684e-10	1.6102e-09
sp|Q9D7S7|RL22L_MOUSE	Rpl22l1	3	2.81839	0.00064646	0.00129918
sp|Q9D823|RL37_MOUSE	Rpl37	5	2.72789	0.000411807	0.000909043
sp|Q9D824|FIP1_MOUSE	Fip1l1	2	2.21025	0.00224493	0.00333929
sp|Q9D880|TIM50_MOUSE	Timm50	2	3.37321	2.40124e-05	8.34802e-05
sp|Q9D883|U2AF1_MOUSE	U2af1	5	2.50843	9.89467e-05	0.000278392
sp|Q9D8E6|RL4_MOUSE	Rpl4	28	2.72438	0.000782263	0.00147563
sp|Q9D8Y0|EFHD2_MOUSE	Efhd2	14	1.81165	0.0627927	0.065972
sp|Q9D903|EBP2_MOUSE	Ebna1bp2	3	2.15724	0.00923768	0.0109846
sp|Q9DAS9|GBG12_MOUSE	Gng12	1	2.80427	0.00133727	0.00225139
sp|Q9DB20|ATPO_MOUSE	Atp5o	3	2.2258	0.0116797	0.0133712
sp|Q9DB41|GHC2_MOUSE	Slc25a18	7	2.70025	0.00160025	0.00258406
sp|Q9DB77|QCR2_MOUSE	Uqcrc2	3	2.15147	0.00290842	0.00420555
sp|Q9DBE9|SPB1_MOUSE	Ftsj3	2	3.13131	1.73676e-05	6.26745e-05
sp|Q9DBR7|MYPT1_MOUSE	Ppp1r12a	65	1.74069	0.0153448	0.0171185
sp|Q9DBY8|NVL_MOUSE	Nvl	1	2.47479	0.00275565	0.00401967
sp|Q9DC48|PRP17_MOUSE	Cdc40	3	5.88321	2.46711e-13	4.0151e-12
sp|Q9DCC8|TOM20_MOUSE	Tomm20	1	3.063	0.00163369	0.00261768
sp|Q9DCL9|PUR6_MOUSE	Paics	3	3.19974	9.54897e-05	0.000271648
sp|Q9DCT8|CRIP2_MOUSE	Crip2	2	2.01776	0.0256237	0.0276923
sp|Q9DCX2|ATP5H_MOUSE	Atp5h	2	1.93223	0.00209378	0.00315635
sp|Q9EQ61|PESC_MOUSE	Pes1	2	3.11126	0.000501655	0.00106489
sp|Q9EQX4|AIF1L_MOUSE	Aif1l	3	2.2831	0.00557103	0.00707027
sp|Q9ER69|FL2D_MOUSE	Wtap	2	4.61225	3.40347e-10	3.17403e-09
sp|Q9ER73|ELP4_MOUSE	Elp4	1	2.76702	0.000679516	0.00132574
sp|Q9ERG0|LIMA1_MOUSE	Lima1	24	2.15896	0.00590555	0.00746059
sp|Q9ERU9|RBP2_MOUSE	Ranbp2	4	2.84513	0.000243005	0.000591478
sp|Q9ESV0|DDX24_MOUSE	Ddx24	2	2.24653	0.00306257	0.00436759
sp|Q9ESX5|DKC1_MOUSE	Dkc1	2	2.31369	0.000948599	0.00171543
sp|Q9JHJ0|TMOD3_MOUSE	Tmod3	12	2.53625	0.00173301	0.00275029
sp|Q9JI44|DMAP1_MOUSE	Dmap1	1	1.76736	0.0171753	0.0189568
sp|Q9JIK5|DDX21_MOUSE	Ddx21	8	2.59519	0.000453113	0.000980039
sp|Q9JIW9|RALB_MOUSE	Ralb	2	2.38933	0.000857193	0.00157754
sp|Q9JJ28|FLII_MOUSE	Flii	11	2.31275	0.00369751	0.00503104
sp|Q9JJ80|RPF2_MOUSE	Rpf2	2	2.47175	0.00254721	0.00374193
sp|Q9JJI8|RL38_MOUSE	Rpl38	7	2.54754	0.00129028	0.00219004
sp|Q9JJU8|SH3L1_MOUSE	Sh3bgrl	1	1.5571	0.00457972	0.00598609
sp|Q9JKB3|YBOX3_MOUSE	Ybx3	3	2.80082	0.00101602	0.00181745
sp|Q9JKK7|TMOD2_MOUSE	Tmod2	15	2.25962	0.00455119	0.00595818
sp|Q9JKN5|OLIG1_MOUSE	Olig1	3	2.69404	0.000429209	0.000939955
sp|Q9JLB2|MPP5_MOUSE	Mpp5	2	2.11447	0.00119278	0.00205822
sp|Q9JLM8|DCLK1_MOUSE	Dclk1	2	1.9723	0.012716	0.0144185
sp|Q9JLR9|HIG1A_MOUSE	Higd1a	1	3.56464	4.50202e-06	2.00645e-05
sp|Q9JM63|KCJ10_MOUSE	Kcnj10	2	2.2996	0.00415959	0.00555951
sp|Q9JM76|ARPC3_MOUSE	Arpc3	3	1.84208	0.0170321	0.0188489
sp|Q9JMB0|GKAP1_MOUSE	Gkap1	1	2.3246	0.000313572	0.000724971
sp|Q9JMH9|MY18A_MOUSE	Myo18a	87	2.05975	0.00453318	0.00594398
sp|Q9QXL1|KI21B_MOUSE	Kif21b	13	2.26689	0.00323365	0.00452602
sp|Q9QXS1|PLEC_MOUSE	Plec	146	2.13562	0.0031428	0.00444382
sp|Q9QXS6|DREB_MOUSE	Dbn1	34	1.78065	0.0217131	0.0237755
sp|Q9QXZ0|MACF1_MOUSE	Macf1	24	2.54216	0.000832198	0.00154871
sp|Q9QYC0|ADDA_MOUSE	Add1	5	2.57745	0.000797731	0.001498
sp|Q9QYF1|RDH11_MOUSE	Rdh11	1	3.68778	1.24088e-05	4.76821e-05
sp|Q9QYH6|MAGD1_MOUSE	Maged1	5	2.52749	0.000614313	0.00125278
sp|Q9QYI4|DJB12_MOUSE	Dnajb12	2	2.87239	3.09886e-05	0.000104982
sp|Q9QYJ0|DNJA2_MOUSE	Dnaja2	1	2.50836	0.000237047	0.000578674
sp|Q9QZ06|TOLIP_MOUSE	Tollip	2	3.43728	2.23197e-05	7.81661e-05
sp|Q9QZB7|ARP10_MOUSE	Actr10	1	2.5951	0.00135419	0.00227066
sp|Q9QZD9|EIF3I_MOUSE	Eif3i	2	3.22808	4.65595e-05	0.00014528
sp|Q9QZH3|PPIE_MOUSE	Ppie	2	7.09792	3.00113e-22	2.76771e-20
sp|Q9QZQ1|AFAD_MOUSE	Afdn	21	1.82567	0.0100205	0.0116812
sp|Q9QZQ8|H2AY_MOUSE	H2afy	4	2.73454	0.00114904	0.00200358
sp|Q9R0A0|PEX14_MOUSE	Pex14	1	2.35616	0.000408706	0.000904603
sp|Q9R0E1|PLOD3_MOUSE	Plod3	6	-0.501074	0.465593	0.470124
sp|Q9R0E2|PLOD1_MOUSE	Plod1	3	-2.418	0.00393594	0.00531193
sp|Q9R0L6|PCM1_MOUSE	Pcm1	17	2.74312	0.00035029	0.000797373
sp|Q9R0Q6|ARC1A_MOUSE	Arpc1a	2	2.70181	6.76493e-05	0.000201974
sp|Q9WTI7|MYO1C_MOUSE	Myo1c	3	2.36747	0.00155488	0.00253049
sp|Q9WTR5|CAD13_MOUSE	Cdh13	2	1.64557	0.043275	0.0459901
sp|Q9WTU0|PHF2_MOUSE	Phf2	1	1.78172	0.0130336	0.0147382
sp|Q9WU40|MAN1_MOUSE	Lemd3	2	4.26658	4.53541e-08	3.0358e-07
sp|Q9WUM3|COR1B_MOUSE	Coro1b	13	1.55738	0.0221518	0.0241603
sp|Q9WUM4|COR1C_MOUSE	Coro1c	35	2.18785	0.0014997	0.00246975
sp|Q9WV02|RBMX_MOUSE	Rbmx	2	3.30487	1.32107e-05	4.98403e-05
sp|Q9WV32|ARC1B_MOUSE	Arpc1b	12	2.07211	0.00346034	0.00477884
sp|Q9WV60|GSK3B_MOUSE	Gsk3b	3	3.84776	3.10612e-06	1.41653e-05
sp|Q9Z0H1|WDR46_MOUSE	Wdr46	1	2.97222	0.00359636	0.0049257
sp|Q9Z0H8|CLIP2_MOUSE	Clip2	5	1.86707	0.0085243	0.0102095
sp|Q9Z0M3|CAD20_MOUSE	Cdh20	3	5.02741	1.58447e-11	1.87873e-10
sp|Q9Z0N1|IF2G_MOUSE	Eif2s3x	3	3.96854	7.39072e-06	3.02922e-05
sp|Q9Z0U1|ZO2_MOUSE	Tjp2	55	2.01415	0.00860118	0.0102867
sp|Q9Z108|STAU1_MOUSE	Stau1	3	2.73147	0.000243978	0.000592111
sp|Q9Z130|HNRDL_MOUSE	Hnrnpdl	3	3.79015	1.25063e-06	6.22348e-06
sp|Q9Z1N5|DX39B_MOUSE	Ddx39b	2	3.4207	8.18138e-07	4.27078e-06
sp|Q9Z1P6|NDUA7_MOUSE	Ndufa7	2	1.0096	0.100115	0.103869
sp|Q9Z329|ITPR2_MOUSE	Itpr2	9	2.22606	0.00702995	0.00866992
