# Supplementary material for: SAFB regulates hippocampal stem cell fate by targeting Drosha to destabilize Nfib mRNA
Source: eLife. 2024 May 9;13:e74940. doi: 10.7554/eLife.74940 (PMC11149935; doi:10.7554/eLife.74940)
Supplement: Supplementary file 2. [file elife-74940-supp2.xlsx]

## Sheet: NFIB pulldown vs AR
NFIB pulldown vs AR
proteinName	geneName	nbPeptides	log2ratio_3p	log2ratio_5p	pValue_3p	pValue_5p	qValue_3p	qValue_5p		Legend:		3' UTR
sp|Q501J6|DDX17_MOUSE	Ddx17	13	1.02995	2.66066	0.0119983	0.000549906	0.0342159	0.00561447			blue	5' UTR
sp|Q60749|KHDR1_MOUSE	Khdrbs1	9	2.42324	3.08661	0.00130886	0.00120304	0.0082628	0.00829097
sp|Q61656|DDX5_MOUSE	Ddx5	31	1.49727	3.09024	0.00222129	0.000302456	0.0119213	0.00431261
sp|Q8CCS6|PABP2_MOUSE	Pabpn1	8	3.12965	2.49769	0.000751047	0.00212704	0.00618583	0.0116622
sp|Q8VEK3|HNRPU_MOUSE	Hnrnpu	42	1.33901	1.4229	0.010216	0.0290526	0.0316112	0.069642
sp|Q9QYS9|QKI_MOUSE	Qki	14	2.69729	1.99935	0.000350865	0.00376107	0.00409293	0.0166332
sp|A2AGT5|CKAP5_MOUSE	Ckap5	6	2.91127	2.81798	0.000157767	0.000463294	0.00296531	0.0054547
sp|O54879|HMGB3_MOUSE	Hmgb3	5	1.90925	2.33704	0.00200598	0.00400902	0.0110123	0.0172443
sp|O55142|RL35A_MOUSE	Rpl35a	5	1.58661	2.38614	0.00928342	0.0010866	0.0296424	0.0078141
sp|O70551|SRPK1_MOUSE	Srpk1	4	1.55914	4.0161	0.00229618	8.34383e-05	0.012144	0.00237846
sp|O88569|ROA2_MOUSE	Hnrnpa2b1	37	2.24214	2.74438	0.00340615	0.00108071	0.0149834	0.0078141
sp|P10922|H10_MOUSE	H1f0	4	2.17582	2.62597	0.0025262	0.00115008	0.0127388	0.00812922
sp|P28352|APEX1_MOUSE	Apex1	9	1.03491	1.92767	0.0173856	0.0023187	0.0445135	0.0120602
sp|P28740|KIF2A_MOUSE	Kif2a	14	1.93151	1.50158	0.000905297	0.0194705	0.00651026	0.0514443
sp|P35922|FMR1_MOUSE	Fmr1	12	1.34784	2.98695	0.0139286	0.000468299	0.0380955	0.0054547
sp|P39749|FEN1_MOUSE	Fen1	4	3.94265	1.98212	0.00591649	0.0412573	0.0217468	0.091474
sp|P43275|H11_MOUSE	Hist1h1a	6	2.85627	2.88284	0.000501942	0.00120063	0.0048836	0.00829097
sp|P43276|H15_MOUSE	Hist1h1b	5	3.03934	1.92059	0.00974575	0.0378339	0.0307623	0.0852374
sp|P49312|ROA1_MOUSE	Hnrnpa1	23	1.07899	2.28618	0.0459303	0.00224545	0.0897976	0.0119816
sp|P50580|PA2G4_MOUSE	Pa2g4	12	1.34893	2.26686	0.0431124	0.00204367	0.0861207	0.0114197
sp|P54103|DNJC2_MOUSE	Dnajc2	5	4.11413	2.04923	8.90928e-05	0.0142425	0.00245599	0.0412992
sp|P62315|SMD1_MOUSE	Snrpd1	4	3.72495	5.84777	0.0196611	0.0207431	0.049272	0.0542864
sp|P62317|SMD2_MOUSE	Snrpd2	8	1.63053	3.03403	0.0108587	0.000617102	0.0322546	0.00582146
sp|P62320|SMD3_MOUSE	Snrpd3	5	1.69077	2.50944	0.00894923	0.00124663	0.0291616	0.00842613
sp|P63089|PTN_MOUSE	Ptn	7	1.56666	2.62563	0.0151197	0.000673063	0.0404659	0.00605025
sp|Q03963|E2AK2_MOUSE	Eif2ak2	4	1.12037	2.93597	0.0268415	0.000902241	0.0609412	0.00703918
sp|Q04750|TOP1_MOUSE	Top1	14	2.1276	3.75655	0.00122011	0.000175761	0.00788307	0.00346082
sp|Q3TEA8|HP1B3_MOUSE	Hp1bp3	4	1.62892	3.41844	0.0107316	0.000336686	0.0322546	0.00471931
sp|Q3TIV5|ZC3HF_MOUSE	Zc3h15	6	2.70139	3.40306	0.00114582	0.000932149	0.00758072	0.0071531
sp|Q60865|CAPR1_MOUSE	Caprin1	6	1.66037	2.07443	0.00377773	0.00416989	0.0159983	0.0173367
sp|Q61136|PRP4B_MOUSE	Prpf4b	7	2.30933	3.79393	0.0257821	0.00310545	0.059558	0.0145096
sp|Q62241|RU1C_MOUSE	Snrpc	4	1.66328	1.87946	0.0146772	0.00807463	0.0395376	0.0269484
sp|Q62446|FKBP3_MOUSE	Fkbp3	5	3.05116	4.32402	0.000736851	8.0803e-05	0.00615531	0.00237846
sp|Q69ZS7|HBS1L_MOUSE	Hbs1l	4	1.3881	1.22645	0.0080085	0.0115081	0.0271944	0.0351188
sp|Q6A068|CDC5L_MOUSE	Cdc5l	10	2.45726	3.75998	0.00195878	0.000228732	0.0110123	0.00364138
sp|Q6P542|ABCF1_MOUSE	Abcf1	18	1.72086	3.16522	0.0122548	0.00107765	0.0347079	0.0078141
sp|Q6PHZ5|RB15B_MOUSE	Rbm15b	4	1.63643	3.05821	0.049451	0.00502225	0.094448	0.0197781
sp|Q6ZWX6|IF2A_MOUSE	Eif2s1	14	1.78012	2.75844	0.00306266	0.000405176	0.0142293	0.00519395
sp|Q7TMK9|HNRPQ_MOUSE	Syncrip	37	1.4789	1.55474	0.01276	0.0153397	0.0357711	0.0430624
sp|Q8BG05|ROA3_MOUSE	Hnrnpa3	33	1.91525	3.29101	0.00155716	0.000274961	0.00926455	0.00406058
sp|Q8BK67|RCC2_MOUSE	Rcc2	7	3.38162	4.42851	0.00846825	0.00160153	0.0283532	0.00974329
sp|Q8BU30|SYIC_MOUSE	Iars	4	2.5554	3.88333	0.00277896	0.000481438	0.0133489	0.00548226
sp|Q8BVY0|RL1D1_MOUSE	Rsl1d1	16	1.50421	3.54573	0.00488918	0.000385313	0.0187192	0.005058
sp|Q8CGP2|H2B1P_MOUSE	Hist1h2bp	11	2.16875	3.30557	0.0330929	0.00143904	0.0705857	0.00903694
sp|Q8CH25|SLTM_MOUSE	Sltm	4	4.64683	3.6732	0.000127851	0.00104929	0.00282502	0.0078141
sp|Q8R326|PSPC1_MOUSE	Pspc1	7	3.25823	2.71663	0.000543258	0.00154295	0.00500402	0.00952253
sp|Q8VCC9|SPON1_MOUSE	Spon1	5	2.9131	3.64147	0.000438362	0.000237769	0.00458892	0.00364138
sp|Q8VIJ6|SFPQ_MOUSE	Sfpq	35	3.27383	3.64167	0.00014942	8.12043e-05	0.00294216	0.00237846
sp|Q91VE6|MK67I_MOUSE	Nifk	5	1.63831	2.74856	0.00639216	0.00423247	0.022984	0.0174142
sp|Q91VM5|RMXL1_MOUSE	Rbmxl1	18	2.84074	1.84853	0.000224164	0.0441325	0.00363498	0.0962997
sp|Q91W39|NCOA5_MOUSE	Ncoa5	7	1.52201	2.00485	0.0106648	0.00445223	0.0322546	0.018049
sp|Q91XI1|DUS3L_MOUSE	Dus3l	9	2.49572	2.05358	0.00100437	0.014614	0.00704636	0.0418193
sp|Q91ZW3|SMCA5_MOUSE	Smarca5	12	2.03172	1.80423	0.00114549	0.00388406	0.00758072	0.0169953
sp|Q921F4|HNRLL_MOUSE	Hnrnpll	8	1.61123	1.50868	0.0115817	0.00767833	0.0334143	0.0262396
sp|Q99K48|NONO_MOUSE	Nono	33	2.90199	2.92661	0.000248823	0.000198301	0.00379845	0.00348925
sp|Q99L45|IF2B_MOUSE	Eif2s2	4	2.61403	3.55234	0.000322614	0.000104364	0.00398212	0.00261542
sp|Q99ME2|WDR6_MOUSE	Wdr6	5	3.56982	2.89775	0.00399499	0.00795061	0.0164371	0.0268374
sp|Q99MN1|SYK_MOUSE	Kars	8	2.07225	1.59869	0.00177977	0.00584847	0.0102213	0.0215535
sp|Q99PL5|RRBP1_MOUSE	Rrbp1	49	2.05356	3.55281	0.000795458	0.000112927	0.00632542	0.0026447
sp|Q9CPR4|RL17_MOUSE	Rpl17	9	3.3308	4.61853	0.00011201	3.66377e-05	0.00271157	0.00206196
sp|Q9CX86|ROA0_MOUSE	Hnrnpa0	22	1.86573	2.51832	0.00736879	0.0029118	0.0255297	0.0138986
sp|Q9CXY6|ILF2_MOUSE	Ilf2	12	1.22179	1.74218	0.0194914	0.00575239	0.0489952	0.0215259
sp|Q9CZU3|SK2L2_MOUSE	Skiv2l2	5	1.97374	2.4733	0.00815999	0.00334435	0.0275441	0.0150314
sp|Q9D4J7|PHF6_MOUSE	Phf6	4	4.27351	3.25666	0.000501699	0.00302194	0.0048836	0.0141997
sp|Q9JHW4|SELB_MOUSE	Eefsec	4	2.41267	3.19179	0.00895654	0.00322334	0.0291616	0.0147276
sp|Q9WTX2|PRKRA_MOUSE	Prkra	4	2.66758	3.92293	0.000258505	7.70296e-05	0.00379845	0.00237846
sp|Q9Z1N5|DX39B_MOUSE	Ddx39b	5	2.12604	3.45366	0.0333273	0.00844806	0.0706711	0.0276596
sp|Q9Z1X4|ILF3_MOUSE	Ilf3	19	1.72137	3.72698	0.00313904	0.000232529	0.0142637	0.00364138
sp|D3YXK2|SAFB1_MOUSE	Safb	11	1.09228	0.408618	0.0324449	0.378081	0.0701172	0.497887
sp|Q64213|SF01_MOUSE	Sf1	10	2.08177	0.0434049	0.00562843	0.69367	0.021062	0.778379
sp|O54836|ZMAT3_MOUSE	Zmat3	5	1.64728	-1.21964	0.031901	0.461937	0.0694267	0.575514
sp|P32233|DRG1_MOUSE	Drg1	7	2.55485	1.87233	0.000861119	0.0579194	0.0064192	0.116001
sp|P61255|RL26_MOUSE	Rpl26	6	2.51041	1.95901	0.0264206	0.0539356	0.0602591	0.110105
sp|P97379|G3BP2_MOUSE	G3bp2	4	1.53155	0.929032	0.0215345	0.219383	0.0528661	0.334741
sp|Q3TJZ6|FA98A_MOUSE	Fam98a	5	1.18197	0.791952	0.0253824	0.115124	0.0589641	0.203435
sp|Q6PGC1|DHX29_MOUSE	Dhx29	6	1.48243	0.677953	0.00359462	0.210991	0.015646	0.324331
sp|Q8BP67|RL24_MOUSE	Rpl24	4	1.11693	-1.02564	0.0414248	0.421987	0.0834981	0.53525
sp|Q8R081|HNRPL_MOUSE	Hnrnpl	24	2.7998	0.932498	0.00103497	0.0653782	0.00713266	0.12782
sp|Q99JF8|PSIP1_MOUSE	Psip1	5	2.93517	-0.303173	0.000193351	0.885475	0.00335906	0.93048
sp|Q9D2L9|F111A_MOUSE	Fam111a	4	2.17605	0.199638	0.00591659	0.920293	0.0217468	0.950165
sp|Q9DAW6|PRP4_MOUSE	Prpf4	5	1.91713	0.506791	0.000861586	0.223342	0.0064192	0.340155
sp|Q9Z130|HNRDL_MOUSE	Hnrnpdl	18	1.22697	0.314542	0.0214515	0.670021	0.0528661	0.7625
sp|Q9Z1Z2|STRAP_MOUSE	Strap	7	1.39956	-0.0487865	0.00737799	0.537864	0.0255297	0.640897
sp|O70133|DHX9_MOUSE	Dhx9	36	0.7024	2.20279	0.221966	0.00468367	0.310078	0.0188029
sp|Q91YR7|PRP6_MOUSE	Prpf6	5	0.738364	1.58356	0.225541	0.0211557	0.313482	0.0548457
sp|Q921F2|TADBP_MOUSE	Tardbp	4	-0.821647	1.53682	0.104521	0.0219833	0.168169	0.056636
sp|O08582|GTPB1_MOUSE	Gtpbp1	12	1.75307	2.94457	0.110653	0.0158498	0.17666	0.0442831
sp|O08583|THOC4_MOUSE	Alyref	10	0.933392	1.64448	0.0512789	0.0261513	0.0967808	0.0653388
sp|O08810|U5S1_MOUSE	Eftud2	7	0.626013	1.65013	0.147606	0.011414	0.222755	0.0349606
sp|O35326|SRSF5_MOUSE	Srsf5	8	0.97538	1.93195	0.0736148	0.0052724	0.128438	0.0201617
sp|O55143|AT2A2_MOUSE	Atp2a2	4	0.347493	2.0516	0.459912	0.0173251	0.555251	0.0474432
sp|O70194|EIF3D_MOUSE	Eif3d	7	1.08883	1.42817	0.0619646	0.0171997	0.112133	0.047414
sp|O70503|DHB12_MOUSE	Hsd17b12	4	0.772909	3.19996	0.209681	0.000749222	0.297438	0.00633368
sp|O88532|ZFR_MOUSE	Zfr	5	0.849545	1.56297	0.12894	0.0275017	0.200817	0.0669343
sp|P10126|EF1A1_MOUSE	Eef1a1	31	-0.342705	1.41184	0.349126	0.0143324	0.439463	0.0412992
sp|P12970|RL7A_MOUSE	Rpl7a	8	-0.00744287	1.29123	0.641258	0.0137585	0.717619	0.0403485
sp|P13864|DNMT1_MOUSE	Dnmt1	4	0.856946	2.41316	0.0837471	0.00230183	0.141924	0.0120602
sp|P14115|RL27A_MOUSE	Rpl27a	4	0.509601	1.56657	0.192054	0.00739702	0.275744	0.025689
sp|P14148|RL7_MOUSE	Rpl7	6	1.47302	2.44631	0.300653	0.0467305	0.392176	0.0996034
sp|P23116|EIF3A_MOUSE	Eif3a	7	0.393662	1.19657	0.349121	0.0260368	0.439463	0.0652499
sp|P27659|RL3_MOUSE	Rpl3	11	0.046837	1.51794	0.455238	0.0143223	0.550523	0.0412992
sp|P28652|KCC2B_MOUSE	Camk2b	5	0.736337	2.00919	0.133431	0.00320343	0.205872	0.014718
sp|P35550|FBRL_MOUSE	Fbl	10	-0.513022	1.38316	0.443111	0.0305842	0.54129	0.0720601
sp|P35564|CALX_MOUSE	Canx	7	0.406049	2.5705	0.375082	0.0010719	0.46999	0.0078141
sp|P51410|RL9_MOUSE	Rpl9	14	0.973709	3.04483	0.0659831	0.000650606	0.117351	0.00595781
sp|P57776|EF1D_MOUSE	Eef1d	7	-0.319153	1.58325	0.285729	0.0221173	0.376271	0.0568043
sp|P62082|RS7_MOUSE	Rps7	16	0.865518	2.29431	0.212648	0.00513905	0.300615	0.019953
sp|P62245|RS15A_MOUSE	Rps15a	7	0.641064	2.0044	0.137734	0.0182529	0.211547	0.0490103
sp|P62264|RS14_MOUSE	Rps14	8	0.399011	1.53794	0.649406	0.0268185	0.720884	0.0662057
sp|P62702|RS4X_MOUSE	Rps4x	18	-0.33215	1.58612	0.800854	0.0189661	0.846939	0.0504341
sp|P62751|RL23A_MOUSE	Rpl23a	14	0.873331	2.65138	0.0601048	0.0012607	0.109637	0.00842613
sp|P62754|RS6_MOUSE	Rps6	8	-0.539887	1.08024	0.182099	0.0267391	0.264203	0.0662057
sp|P62852|RS25_MOUSE	Rps25	7	0.536755	1.30914	0.0783729	0.0226366	0.1341	0.0577793
sp|P62900|RL31_MOUSE	Rpl31	5	-0.354066	2.06168	0.470187	0.00432437	0.562827	0.017617
sp|P63158|HMGB1_MOUSE	Hmgb1	11	0.947508	1.69449	0.0534172	0.0284911	0.0994955	0.0684946
sp|P67984|RL22_MOUSE	Rpl22	6	-0.263972	2.3022	0.905093	0.00985745	0.925231	0.0311149
sp|P70333|HNRH2_MOUSE	Hnrnph2	5	0.149462	2.03769	0.334655	0.0231114	0.42644	0.0586293
sp|P97351|RS3A_MOUSE	Rps3a	13	-0.368508	1.13504	0.813466	0.0223081	0.855899	0.0571171
sp|P97855|G3BP1_MOUSE	G3bp1	8	0.661498	1.43928	0.12972	0.0334987	0.201273	0.0773986
sp|Q05D44|IF2P_MOUSE	Eif5b	9	0.892177	2.16758	0.0932771	0.00586401	0.154	0.0215535
sp|Q07646|MEST_MOUSE	Mest	6	1.11481	2.73196	0.237023	0.00808125	0.325291	0.0269484
sp|Q61584|FXR1_MOUSE	Fxr1	16	1.50935	2.8179	0.0933397	0.00828019	0.154	0.0273946
sp|Q6PDM2|SRSF1_MOUSE	Srsf1	18	-0.678554	1.43207	0.117259	0.0209022	0.185063	0.0545303
sp|Q6PDQ2|CHD4_MOUSE	Chd4	6	0.362502	1.26836	0.389152	0.0451392	0.484407	0.0972139
sp|Q7TPV4|MBB1A_MOUSE	Mybbp1a	13	2.18603	4.04883	0.112311	0.00913676	0.178618	0.029516
sp|Q80UG5|SEPT9_MOUSE	Septin09	11	-0.36292	1.30609	0.165785	0.0235396	0.245267	0.059533
sp|Q8BMS1|ECHA_MOUSE	Hadha	19	1.36085	2.0514	0.137876	0.0103971	0.211547	0.0322038
sp|Q8C7X2|EMC1_MOUSE	Emc1	4	1.64513	3.81829	0.267679	0.013186	0.358785	0.039226
sp|Q8C854|MYEF2_MOUSE	Myef2	20	0.509407	2.39922	0.200482	0.0039935	0.286353	0.0172443
sp|Q8K224|NAT10_MOUSE	Nat10	5	0.570952	2.76649	0.819034	0.0192775	0.860663	0.0510978
sp|Q8K363|DDX18_MOUSE	Ddx18	7	0.0921302	1.80656	0.710879	0.00838689	0.767489	0.0276333
sp|Q91WJ7|SPS2L_MOUSE	Spats2l	7	0.717227	2.68359	0.0354783	0.000570313	0.0739057	0.0056175
sp|Q91WQ3|SYYC_MOUSE	Yars	12	1.20212	2.01757	0.289572	0.0435948	0.380725	0.095378
sp|Q91YQ5|RPN1_MOUSE	Rpn1	6	-0.529226	1.3362	0.291145	0.0196755	0.382186	0.0518205
sp|Q99JX7|NXF1_MOUSE	Nxf1	7	0.139397	1.32883	0.336059	0.0189095	0.426913	0.0504341
sp|Q99JY0|ECHB_MOUSE	Hadhb	9	1.05038	1.67944	0.0992041	0.0298079	0.160866	0.0709464
sp|Q99KP6|PRP19_MOUSE	Prpf19	4	1.90335	2.40635	0.121391	0.0298541	0.189774	0.0709464
sp|Q99MJ9|DDX50_MOUSE	Ddx50	4	1.15964	3.63071	0.240332	0.00385226	0.326899	0.0169458
sp|Q9CZM2|RL15_MOUSE	Rpl15	4	-0.121205	1.64486	0.510467	0.0280529	0.60308	0.0678354
sp|Q9D6Z1|NOP56_MOUSE	Nop56	10	0.264741	2.31882	0.367368	0.00265629	0.461722	0.0131542
sp|Q9DBG6|RPN2_MOUSE	Rpn2	9	-0.779289	1.52917	0.034713	0.00942393	0.0730475	0.0300911
sp|Q9R0U0|SRS10_MOUSE	Srsf10	8	1.78075	1.9746	0.0520691	0.0339098	0.0978658	0.0776825
sp|Q9WVR4|FXR2_MOUSE	Fxr2	5	0.745371	1.86694	0.293739	0.0205307	0.384979	0.0539014
sp|P56959|FUS_MOUSE	Fus	8	0.394485	0.965014	0.166971	0.0918419	0.246141	0.170644
sp|Q3U0V1|FUBP2_MOUSE	Khsrp	21	-0.461363	-2.02942	0.496435	0.00169455	0.588183	0.0100099
sp|Q9WVA3|BUB3_MOUSE	Bub3	2	1.66647	2.74153	0.0287253	0.00144241	0.064379	0.00903694
sp|Q9Z315|SNUT1_MOUSE	Sart1	7	0.783974	1.33124	0.307399	0.207046	0.398462	0.32005
Biognosys|iRT	NA	11	-3.71254	-1.81502	0.000168485	0.0186283	0.00309639	0.0498564
sp|A2RSY6|TRM1L_MOUSE	Trmt1l	3	1.11787	2.38337	0.469545	0.0230313	0.562827	0.0586058
sp|B2RVL6|ZCH24_MOUSE	Zcchc24	1	-2.40764	2.67833	0.23789	0.00125749	0.32572	0.00842613
sp|C0HKD8|MFA1A_MOUSE	Mfap1a	1	1.44906	1.23494	0.396023	0.333405	0.491021	0.454244
sp|E9PVA8|GCN1_MOUSE	Gcn1	3	2.04515	3.07505	0.00398546	0.00045678	0.0164371	0.0054547
sp|E9Q4Z2|ACACB_MOUSE	Acacb	1	12.5611	8.92461	1.52194e-07	3.89775e-07	4.19548e-05	0.000161172
sp|E9Q5C9|NOLC1_MOUSE	Nolc1	2	-5.80288	-6.0663	0.000214516	0.0136037	0.00354809	0.0401147
sp|G5E870|TRIPC_MOUSE	Trip12	1	10.0636	8.75613	5.88585e-08	3.43538e-06	2.55497e-05	0.000947021
sp|O08553|DPYL2_MOUSE	Dpysl2	15	-1.19944	-1.10232	0.0659701	0.413958	0.117351	0.528721
sp|O08585|CLCA_MOUSE	Clta	3	-1.00312	-1.13626	0.0264499	0.193368	0.0602591	0.303299
sp|O08663|MAP2_MOUSE	Metap2	3	0.635838	1.61811	0.310743	0.0534517	0.401538	0.109417
sp|O08709|PRDX6_MOUSE	Prdx6	2	-4.76372	-2.09857	0.00134929	0.0281458	0.00832731	0.0678617
sp|O08756|HCD2_MOUSE	Hsd17b10	3	-0.294905	1.04929	0.991707	0.0150234	0.992769	0.0426953
sp|O08784|TCOF_MOUSE	Tcof1	1	2.14457	3.13769	0.0110093	0.001303	0.0322546	0.00850904
sp|O09167|RL21_MOUSE	Rpl21	2	-0.13951	-0.345791	0.452785	0.494603	0.549052	0.603299
sp|O35129|PHB2_MOUSE	Phb2	2	-4.50836	-1.89564	0.0027856	0.109572	0.0133489	0.194873
sp|O35130|NEP1_MOUSE	Emg1	3	0.54975	2.72881	0.709825	0.00210892	0.767353	0.0116622
sp|O35286|DHX15_MOUSE	Dhx15	14	-0.0114315	0.486887	0.935985	0.135578	0.949767	0.230665
sp|O35295|PURB_MOUSE	Purb	2	1.78152	3.46552	0.0406916	0.00130671	0.0824803	0.00850904
sp|O35593|PSDE_MOUSE	Psmd14	2	0.285669	2.71604	0.992769	0.0828363	0.992769	0.156406
sp|O35638|STAG2_MOUSE	Stag2	2	8.58269	9.15322	0.719082	0.21423	0.774324	0.328544
sp|O35737|HNRH1_MOUSE	Hnrnph1	12	-2.47853	-0.378239	0.00127806	0.820702	0.00813041	0.880312
sp|O35841|API5_MOUSE	Api5	2	0.0854692	0.444787	0.647056	0.563737	0.720884	0.666015
sp|O35887|CALU_MOUSE	Calu	1	-3.89023	-3.78471	0.00274594	0.00418242	0.0133489	0.0173367
sp|O35900|LSM2_MOUSE	Lsm2	3	-1.88961	-2.93193	0.00201071	0.000566642	0.0110123	0.0056175
sp|O54734|OST48_MOUSE	Ddost	2	0.499006	0.90698	0.173259	0.0407045	0.254052	0.0904909
sp|O54774|AP3D1_MOUSE	Ap3d1	1	-10.3547	-10.3547	0.229688	0.514445	0.317645	0.621997
sp|O54781|SRPK2_MOUSE	Srpk2	5	-0.315144	1.60391	0.652799	0.120924	0.723679	0.210979
sp|O55029|COPB2_MOUSE	Copb2	2	-0.251902	1.28786	0.401763	0.150927	0.497392	0.248638
sp|O55131|SEPT7_MOUSE	Septin07	8	-0.58723	0.929674	0.141503	0.102881	0.21591	0.186177
sp|O55135|IF6_MOUSE	Eif6	2	0.797766	1.79283	0.093875	0.0117761	0.154343	0.0356735
sp|O70251|EF1B_MOUSE	Eef1b	2	-2.02671	2.82328	0.0952508	0.00520216	0.155677	0.0200783
sp|O70305|ATX2_MOUSE	Atxn2	1	-0.908108	-6.57925	0.0318547	0.00394153	0.0694267	0.017156
sp|O70310|NMT1_MOUSE	Nmt1	2	3.67052	4.40352	0.000140055	6.23497e-05	0.00282502	0.00237846
sp|O70456|1433S_MOUSE	Sfn	1	-5.90728	-5.1559	0.000137789	0.00193363	0.00282502	0.0109528
sp|O88342|WDR1_MOUSE	Wdr1	4	-0.777197	-0.646983	0.0797121	0.39992	0.135363	0.517581
sp|O88487|DC1I2_MOUSE	Dync1i2	1	-1.6332	0.581115	0.00328539	0.547345	0.0147664	0.649432
sp|O88622|PARG_MOUSE	Parg	1	1.77463	0.671661	0.0305648	0.168213	0.0674055	0.272769
sp|O88665|BRD7_MOUSE	Brd7	1	3.85049	0.864803	0.000125119	0.106727	0.00282502	0.191046
sp|O88796|RPP30_MOUSE	Rpp30	2	1.6984	2.2392	0.649253	0.456537	0.720884	0.571189
sp|O88844|IDHC_MOUSE	Idh1	5	-0.859892	-0.0781864	0.0426417	0.407625	0.0853866	0.525087
sp|O89086|RBM3_MOUSE	Rbm3	9	-1.42627	-1.04887	0.0209828	0.171033	0.0522443	0.276259
sp|P05063|ALDOC_MOUSE	Aldoc	6	-1.93365	-1.77388	0.0438255	0.216207	0.0871242	0.330505
sp|P05064|ALDOA_MOUSE	Aldoa	10	-1.80527	-1.58554	0.0131983	0.117813	0.036875	0.206423
sp|P05213|TBA1B_MOUSE	Tuba1b	24	-2.56885	-1.34472	0.000829385	0.049658	0.0064192	0.104589
sp|P06151|LDHA_MOUSE	Ldha	7	-2.08855	0.238266	0.0145129	0.636142	0.039337	0.73068
sp|P06745|G6PI_MOUSE	Gpi	3	-3.96192	-1.37085	0.00198347	0.209674	0.0110123	0.32343
sp|P06837|NEUM_MOUSE	Gap43	1	-1.45366	-3.33373	0.578249	0.00828132	0.663262	0.0273946
sp|P07356|ANXA2_MOUSE	Anxa2	2	-3.79514	-2.61684	0.0336949	0.087256	0.0710859	0.162524
sp|P07742|RIR1_MOUSE	Rrm1	2	-1.94171	-0.164202	0.0361166	0.952785	0.0750462	0.968002
sp|P07901|HS90A_MOUSE	Hsp90aa1	12	-2.36001	-1.50534	0.00457588	0.0714952	0.0178503	0.137824
sp|P08113|ENPL_MOUSE	Hsp90b1	11	-1.01735	0.634261	0.0442475	0.92736	0.0877522	0.953889
sp|P08752|GNAI2_MOUSE	Gnai2	7	-2.15004	-0.365711	0.00335359	0.456005	0.0148921	0.571189
sp|P09055|ITB1_MOUSE	Itgb1	2	-1.96893	-0.770806	0.0289287	0.611326	0.0646596	0.705114
sp|P09103|PDIA1_MOUSE	P4hb	1	5.02072	4.8692	0.865667	0.938149	0.897126	0.957839
sp|P09405|NUCL_MOUSE	Ncl	46	-1.19716	0.921581	0.0409816	0.0650127	0.0828649	0.127406
sp|P09411|PGK1_MOUSE	Pgk1	2	-2.81501	-2.61463	0.0543322	0.111982	0.100972	0.198306
sp|P0C0S6|H2AZ_MOUSE	H2afz	2	-1.46574	0.845704	0.0457333	0.0570216	0.0896242	0.115017
sp|P10639|THIO_MOUSE	Txn	1	-0.789217	0.235777	0.343837	0.868181	0.434791	0.92286
sp|P10649|GSTM1_MOUSE	Gstm1	1	0	11.8872	0.269472	7.84221e-06	0.359441	0.00162138
sp|P10852|4F2_MOUSE	Slc3a2	1	-6.70771	-7.12113	0.00040036	0.000205122	0.00435655	0.00353407
sp|P11031|TCP4_MOUSE	Sub1	2	-0.011774	0.26458	0.877523	0.613175	0.901688	0.706261
sp|P11499|HS90B_MOUSE	Hsp90ab1	34	-1.75267	-0.767057	0.00343219	0.144748	0.0150181	0.240374
sp|P11983|TCPA_MOUSE	Tcp1	8	-1.10786	1.28291	0.0296461	0.123269	0.06573	0.214166
sp|P12787|COX5A_MOUSE	Cox5a	1	-2.03966	-0.0590874	0.0478855	0.354317	0.0931796	0.473458
sp|P13707|GPDA_MOUSE	Gpd1	8	-0.602965	1.65317	0.489577	0.0743744	0.581041	0.14205
sp|P14131|RS16_MOUSE	Rps16	9	-1.43191	-3.70046	0.060418	0.000789725	0.109637	0.006597
sp|P14152|MDHC_MOUSE	Mdh1	3	-0.166542	1.04498	0.272962	0.317585	0.362342	0.437738
sp|P14206|RSSA_MOUSE	Rpsa	13	-1.46146	-0.539756	0.00939302	0.140617	0.029877	0.235883
sp|P14211|CALR_MOUSE	Calr	6	-1.77482	-0.620417	0.0252918	0.505329	0.0589192	0.612767
sp|P14576|SRP54_MOUSE	Srp54	1	5.3038	4.74798	0.0414966	0.0566887	0.0834981	0.114625
sp|P14685|PSMD3_MOUSE	Psmd3	4	-2.9944	0.452744	0.00151731	0.414282	0.00909289	0.528721
sp|P14733|LMNB1_MOUSE	Lmnb1	9	-1.59483	-0.34775	0.00861177	0.396149	0.0284629	0.514096
sp|P14869|RLA0_MOUSE	Rplp0	9	-0.563377	1.32692	0.106686	0.0540541	0.170657	0.110105
sp|P15105|GLNA_MOUSE	Glul	4	-0.616415	-1.05681	0.104179	0.103537	0.168038	0.186955
sp|P15864|H12_MOUSE	Hist1h1c	2	-5.25007	-6.29598	0.422951	0.662684	0.520506	0.756961
sp|P16045|LEG1_MOUSE	Lgals1	3	-1.06996	-0.969735	0.0529886	0.174028	0.09892	0.280548
sp|P16125|LDHB_MOUSE	Ldhb	3	-4.53421	-2.9379	0.0080235	0.021106	0.0271944	0.0548457
sp|P16254|SRP14_MOUSE	Srp14	1	-1.91828	-0.462401	0.00266556	0.462082	0.0132796	0.575514
sp|P16460|ASSY_MOUSE	Ass1	2	-5.24935	-3.45672	0.000856132	0.00570143	0.0064192	0.0214322
sp|P16546|SPTN1_MOUSE	Sptan1	3	-4.07934	-2.75488	0.000432122	0.00227778	0.0045816	0.0120602
sp|P16858|G3P_MOUSE	Gapdh	12	-1.77598	-0.995658	0.094065	0.155291	0.154349	0.254812
sp|P17182|ENOA_MOUSE	Eno1	27	-2.16967	-1.03706	0.0222229	0.407129	0.0538954	0.525087
sp|P17225|PTBP1_MOUSE	Ptbp1	19	-5.00537	-4.06084	5.88547e-06	6.05875e-05	0.000450386	0.00237846
sp|P17426|AP2A1_MOUSE	Ap2a1	1	-1.72187	0.511148	0.112277	0.291321	0.178618	0.409036
sp|P17427|AP2A2_MOUSE	Ap2a2	2	1.30812	0.905274	0.755558	0.239456	0.805214	0.358585
sp|P17710|HXK1_MOUSE	Hk1	2	-1.90308	-3.06752	0.464564	0.273995	0.560051	0.391355
sp|P17742|PPIA_MOUSE	Ppia	7	-1.97347	-2.39158	0.0233665	0.0360058	0.0555291	0.0813575
sp|P17751|TPIS_MOUSE	Tpi1	2	-6.43752	-3.97233	0.00313034	0.0338576	0.0142637	0.0776825
sp|P17879|HS71B_MOUSE	Hspa1b	3	-4.57742	-3.48887	0.00177073	0.00418103	0.0102213	0.0173367
sp|P18242|CATD_MOUSE	Ctsd	3	-1.58496	-0.784074	0.0108932	0.252009	0.0322546	0.371687
sp|P18608|HMGN1_MOUSE	Hmgn1	2	0.752094	-2.14479	0.179723	0.315545	0.261674	0.437111
sp|P18760|COF1_MOUSE	Cfl1	12	-2.38467	-0.425767	0.0491249	0.754545	0.0944087	0.827598
sp|P19096|FAS_MOUSE	Fasn	15	-1.17327	0.882151	0.0374207	0.27919	0.0772965	0.397401
sp|P19253|RL13A_MOUSE	Rpl13a	2	2.52714	2.15372	0.017549	0.0486647	0.0447934	0.103194
sp|P20029|GRP78_MOUSE	Hspa5	7	-1.30248	-0.124521	0.0108282	0.47509	0.0322546	0.587598
sp|P20152|VIME_MOUSE	Vim	45	-2.30935	-0.400821	0.00064099	0.252136	0.00569999	0.371687
sp|P20357|MTAP2_MOUSE	Map2	14	-0.226166	-0.964578	0.865573	0.0696719	0.897126	0.134938
sp|P21107|TPM3_MOUSE	Tpm3	8	-2.57841	-2.38223	0.00301902	0.0144419	0.0141441	0.0414704
sp|P22752|H2A1_MOUSE	Hist1h2ab	3	-0.346059	0.812027	0.295364	0.0590693	0.386497	0.117429
sp|P23198|CBX3_MOUSE	Cbx3	2	-5.65318	-4.46393	0.00030451	0.00057058	0.00389548	0.0056175
sp|P23492|PNPH_MOUSE	Pnp	1	-4.44507	-9.91888	0.0153494	0.000236109	0.0406859	0.00364138
sp|P25206|MCM3_MOUSE	Mcm3	1	2.23778	3.20142	0.09348	0.0418887	0.154	0.0926256
sp|P25444|RS2_MOUSE	Rps2	5	0.400097	1.10661	0.607258	0.116474	0.687948	0.204945
sp|P26039|TLN1_MOUSE	Tln1	3	-5.2042	-4.61244	0.0443783	0.0649281	0.0878011	0.127406
sp|P26041|MOES_MOUSE	Msn	10	-1.77141	-0.226593	0.00620695	0.39624	0.0225138	0.514096
sp|P26350|PTMA_MOUSE	Ptma	1	-3.8165	-2.77318	0.00124962	0.00356902	0.00801111	0.0159545
sp|P26369|U2AF2_MOUSE	U2af2	8	-3.17682	-3.08818	0.000582093	0.000534488	0.00523251	0.00561447
sp|P26443|DHE3_MOUSE	Glud1	7	-1.40062	-1.51287	0.00718957	0.0258121	0.0253012	0.0648834
sp|P26516|PSMD7_MOUSE	Psmd7	1	-2.79019	-1.186	0.0374799	0.133077	0.0772965	0.227386
sp|P26638|SYSC_MOUSE	Sars	5	-0.235236	0.691188	0.870678	0.396606	0.89894	0.514096
sp|P26645|MARCS_MOUSE	Marcks	3	-0.150512	-0.642954	0.475331	0.693515	0.566425	0.778379
sp|P27048|RSMB_MOUSE	Snrpb	3	2.49401	1.53772	0.00051496	0.00733201	0.004952	0.0256686
sp|P27661|H2AX_MOUSE	H2afx	6	-0.194319	0.693768	0.306457	0.408907	0.397865	0.525869
sp|P27773|PDIA3_MOUSE	Pdia3	2	-5.47791	-5.12454	0.000334606	0.00046276	0.0040694	0.0054547
sp|P28656|NP1L1_MOUSE	Nap1l1	6	-1.07456	-0.207867	0.0325877	0.689127	0.0701172	0.778236
sp|P28658|ATX10_MOUSE	Atxn10	2	0.873913	2.74497	0.0974127	0.00221938	0.158583	0.0119816
sp|P28667|MRP_MOUSE	Marcksl1	3	-0.960937	-3.04047	0.262558	0.0504878	0.353641	0.105438
sp|P29341|PABP1_MOUSE	Pabpc1	13	-0.380809	-2.71198	0.140313	0.00119168	0.214621	0.00829097
sp|P29595|NEDD8_MOUSE	Nedd8	3	-2.60756	-2.92091	0.00327969	0.00224565	0.0147664	0.0119816
sp|P29758|OAT_MOUSE	Oat	2	0.518694	0.833344	0.597918	0.76375	0.67841	0.834658
sp|P30681|HMGB2_MOUSE	Hmgb2	8	-0.405946	-2.11511	0.940366	0.11645	0.951876	0.204945
sp|P31230|AIMP1_MOUSE	Aimp1	4	0.395835	-0.890666	0.270202	0.135376	0.359834	0.230665
sp|P31786|ACBP_MOUSE	Dbi	3	-1.03892	-0.686663	0.0996191	0.296904	0.161223	0.415464
sp|P34022|RANG_MOUSE	Ranbp1	1	-3.49136	-2.80428	0.0145552	0.0294781	0.039337	0.0704577
sp|P35278|RAB5C_MOUSE	Rab5c	1	0.592999	2.70344	0.574268	0.0348926	0.6607	0.079058
sp|P35700|PRDX1_MOUSE	Prdx1	8	-1.36729	-0.121492	0.0354044	0.895312	0.0739057	0.93606
sp|P35979|RL12_MOUSE	Rpl12	6	-1.07737	-0.414909	0.0273703	0.250033	0.0618448	0.369905
sp|P35980|RL18_MOUSE	Rpl18	4	-0.688524	-1.84806	0.205825	0.00935114	0.292973	0.0299744
sp|P38647|GRP75_MOUSE	Hspa9	5	-2.52155	-2.88429	0.00381097	0.00529033	0.0159983	0.0201617
sp|P39054|DYN2_MOUSE	Dnm2	1	-6.54558	-6.54558	0.178553	0.092028	0.26043	0.170644
sp|P40124|CAP1_MOUSE	Cap1	2	-1.74187	-1.80745	0.00159868	0.00609892	0.00944365	0.0223177
sp|P40142|TKT_MOUSE	Tkt	4	-1.92276	-0.474836	0.0168208	0.325205	0.0436075	0.446752
sp|P41105|RL28_MOUSE	Rpl28	2	2.86162	0.435243	0.00013455	0.2993	0.00282502	0.417405
sp|P42208|SEPT2_MOUSE	Septin02	4	-1.15976	0.392033	0.0211854	0.294443	0.052456	0.412719
sp|P42669|PURA_MOUSE	Pura	2	0.964256	-0.528638	0.160752	0.541897	0.239536	0.643892
sp|P42932|TCPQ_MOUSE	Cct8	5	-1.58404	0.446943	0.00310862	0.884147	0.0142637	0.93048
sp|P43024|CX6A1_MOUSE	Cox6a1	1	-4.39736	-2.78365	0.0485926	0.872943	0.0939775	0.923009
sp|P43274|H14_MOUSE	Hist1h1e	3	3.63086	1.83688	0.00291318	0.0153608	0.0137669	0.0430624
sp|P43277|H13_MOUSE	Hist1h1d	14	1.4644	0.520937	0.076888	0.268143	0.132196	0.386332
sp|P45591|COF2_MOUSE	Cfl2	1	-1.98252	-1.60879	0.0262974	0.284423	0.0602591	0.402771
sp|P46061|RAGP1_MOUSE	Rangap1	1	-1.10721	2.34606	0.448853	0.00241715	0.546688	0.0123394
sp|P46471|PRS7_MOUSE	Psmc2	3	-3.44835	-0.720778	0.000676239	0.049702	0.00588684	0.104589
sp|P46735|MYO1B_MOUSE	Myo1b	1	-0.35718	3.23989	0.805583	0.000811473	0.850852	0.00671088
sp|P47753|CAZA1_MOUSE	Capza1	2	1.28968	2.15324	0.0222996	0.00784337	0.0539234	0.0265839
sp|P47754|CAZA2_MOUSE	Capza2	4	0.485832	1.49842	0.654022	0.518958	0.724064	0.625624
sp|P47878|IBP3_MOUSE	Igfbp3	1	0.737137	-1.02571	0.52089	0.17061	0.61103	0.276115
sp|P47911|RL6_MOUSE	Rpl6	10	-0.512595	-0.0216505	0.394378	0.577868	0.489715	0.67595
sp|P47955|RLA1_MOUSE	Rplp1	4	-0.425518	1.80006	0.877701	0.0524841	0.901688	0.10824
sp|P47962|RL5_MOUSE	Rpl5	7	-0.986962	-0.254497	0.0152934	0.885353	0.0406677	0.93048
sp|P47963|RL13_MOUSE	Rpl13	5	-0.0447574	0.449064	0.328753	0.91737	0.421517	0.949518
sp|P48678|LMNA_MOUSE	Lmna	2	-6.00083	-4.64251	0.00021261	0.000969129	0.00354809	0.00729663
sp|P49718|MCM5_MOUSE	Mcm5	2	1.01126	1.84687	0.0331164	0.00315465	0.0705857	0.0145748
sp|P50396|GDIA_MOUSE	Gdi1	1	-2.42201	-0.106277	0.0649566	0.233752	0.116275	0.35084
sp|P51150|RAB7A_MOUSE	Rab7a	2	-1.05789	1.17016	0.469308	0.188546	0.562827	0.297572
sp|P51859|HDGF_MOUSE	Hdgf	3	1.23775	1.65783	0.368789	0.142327	0.462804	0.238241
sp|P51880|FABP7_MOUSE	Fabp7	5	-1.44174	-0.797124	0.00859252	0.142925	0.0284629	0.238304
sp|P51881|ADT2_MOUSE	Slc25a5	8	-1.1571	1.21823	0.0788059	0.0932903	0.1341	0.171912
sp|P52293|IMA1_MOUSE	Kpna2	1	-1.16789	-3.35031	0.854479	0.00641752	0.889992	0.023089
sp|P52479|UBP10_MOUSE	Usp10	2	1.77676	1.76593	0.011099	0.00490215	0.0323199	0.0195849
sp|P52480|KPYM_MOUSE	Pkm	34	-1.3815	-0.197128	0.0663924	0.955547	0.117406	0.969617
sp|P52912|TIA1_MOUSE	Tia1	2	-6.00748	-4.98983	0.00417734	0.0106875	0.016852	0.0329797
sp|P53026|RL10A_MOUSE	Rpl10a	7	-0.145576	0.718736	0.220087	0.91912	0.309019	0.950141
sp|P54071|IDHP_MOUSE	Idh2	2	-2.07169	-0.383962	0.0027707	0.475336	0.0133489	0.587598
sp|P54227|STMN1_MOUSE	Stmn1	2	-3.46721	-2.44804	5.36106e-05	0.00160228	0.00186858	0.00974329
sp|P54276|MSH6_MOUSE	Msh6	1	0.155542	1.75762	0.792301	0.488643	0.838967	0.599567
sp|P54775|PRS6B_MOUSE	Psmc4	2	0.73243	-0.00657806	0.708305	0.724744	0.766712	0.806608
sp|P54823|DDX6_MOUSE	Ddx6	5	-0.0716021	0.0920168	0.636891	0.58296	0.714459	0.679983
sp|P55096|ABCD3_MOUSE	Abcd3	3	-0.426854	1.08974	0.220477	0.0345293	0.309041	0.078666
sp|P56391|CX6B1_MOUSE	Cox6b1	1	-1.77511	-1.47537	0.967683	0.770164	0.971207	0.839164
sp|P56399|UBP5_MOUSE	Usp5	2	-0.535889	0.0520014	0.408525	0.411665	0.505008	0.527824
sp|P56480|ATPB_MOUSE	Atp5b	15	-1.76573	-0.0976595	0.00904247	0.999248	0.0292756	0.999476
sp|P57722|PCBP3_MOUSE	Pcbp3	1	-8.30778	-3.73491	7.24868e-07	0.00168185	0.000137299	0.0100099
sp|P58252|EF2_MOUSE	Eef2	21	-2.21379	0.257021	0.035233	0.670299	0.0739057	0.7625
sp|P59325|IF5_MOUSE	Eif5	3	0.0943831	-1.66683	0.268144	0.102113	0.358827	0.185599
sp|P59326|YTHD1_MOUSE	Ythdf1	1	3.74359	0.162899	0.000498464	0.90493	0.0048836	0.94254
sp|P60229|EIF3E_MOUSE	Eif3e	2	1.60857	-1.21012	0.00398886	0.0636688	0.0164371	0.125666
sp|P60335|PCBP1_MOUSE	Pcbp1	16	-6.6723	-5.18019	3.84095e-06	4.48795e-05	0.000397058	0.00206196
sp|P60670|NPL4_MOUSE	Nploc4	1	1.93086	3.52052	0.0139576	0.000626768	0.0380955	0.00582402
sp|P60710|ACTB_MOUSE	Actb	1	-3.09677	-4.96606	0.0118658	0.000210385	0.0339941	0.00355078
sp|P60824|CIRBP_MOUSE	Cirbp	8	0.340183	0.607169	0.649034	0.167683	0.720884	0.272444
sp|P60843|IF4A1_MOUSE	Eif4a1	6	0.642479	0.542072	0.476028	0.191686	0.56644	0.301951
sp|P60867|RS20_MOUSE	Rps20	4	-0.14012	-2.79247	0.95573	0.0099337	0.962714	0.0311181
sp|P61027|RAB10_MOUSE	Rab10	1	3.85052	2.9178	0.00147155	0.0526834	0.00888299	0.108381
sp|P61161|ARP2_MOUSE	Actr2	2	0.176065	-0.318483	0.664349	0.930965	0.730607	0.955221
sp|P61205|ARF3_MOUSE	Arf3	3	-1.86069	-0.168276	0.00468478	0.779094	0.0181043	0.845552
sp|P61358|RL27_MOUSE	Rpl27	6	1.15716	1.23211	0.0644824	0.0690999	0.115677	0.134145
sp|P61514|RL37A_MOUSE	Rpl37a	2	0.691867	0.47741	0.150559	0.226953	0.226387	0.344386
sp|P61620|S61A1_MOUSE	Sec61a1	1	-1.80791	3.72605	0.0922369	0.0988324	0.153172	0.18021
sp|P61924|COPZ1_MOUSE	Copz1	1	12.5508	13.1306	6.1789e-08	1.04192e-07	2.55497e-05	8.61664e-05
sp|P61979|HNRPK_MOUSE	Hnrnpk	33	-5.0688	-3.71807	1.0943e-05	0.000115126	0.000743075	0.0026447
sp|P62075|TIM13_MOUSE	Timm13	1	-1.83984	-3.42412	0.0164953	0.00138776	0.0430763	0.00882827
sp|P62077|TIM8B_MOUSE	Timm8b	1	-4.35722	-2.8959	0.0113455	0.0343016	0.0329217	0.0783631
sp|P62137|PP1A_MOUSE	Ppp1ca	2	1.93038	-0.145625	0.0126199	0.525759	0.0354988	0.630149
sp|P62141|PP1B_MOUSE	Ppp1cb	9	0.0389831	0.715575	0.562607	0.137315	0.652561	0.231755
sp|P62196|PRS8_MOUSE	Psmc5	1	-1.34689	1.24169	0.0902451	0.648083	0.151078	0.741531
sp|P62204|CALM_MOUSE	Calm1	8	-1.25537	0.286327	0.0572354	0.924672	0.105591	0.953496
sp|P62242|RS8_MOUSE	Rps8	9	-0.0607303	0.861269	0.923255	0.105455	0.938	0.189179
sp|P62259|1433E_MOUSE	Ywhae	2	-2.33234	-1.97335	0.0110376	0.0168285	0.0322546	0.0465458
sp|P62267|RS23_MOUSE	Rps23	6	-1.48502	-0.792518	0.00408816	0.267309	0.0167133	0.386118
sp|P62270|RS18_MOUSE	Rps18	8	-1.86703	-1.37341	0.00244671	0.0121719	0.0125201	0.0364717
sp|P62274|RS29_MOUSE	Rps29	2	-1.74058	-3.11056	0.869164	0.445091	0.89894	0.561113
sp|P62281|RS11_MOUSE	Rps11	8	0.347651	-0.227354	0.202776	0.370788	0.28913	0.489061
sp|P62301|RS13_MOUSE	Rps13	2	-0.277968	-3.196	0.441959	0.597675	0.54068	0.692265
sp|P62305|RUXE_MOUSE	Snrpe	1	-2.82471	-2.12866	0.313036	0.89855	0.40387	0.937076
sp|P62322|LSM5_MOUSE	Lsm5	1	-2.44122	-4.74186	0.00132084	0.00132412	0.00827525	0.00855505
sp|P62717|RL18A_MOUSE	Rpl18a	7	0.361375	0.95916	0.282501	0.421803	0.37328	0.53525
sp|P62806|H4_MOUSE	Hist1h4a	13	-0.981638	0.141246	0.0573465	0.843814	0.105591	0.902761
sp|P62821|RAB1A_MOUSE	Rab1A	3	-2.86337	-0.32359	0.000720074	0.406264	0.00613919	0.52497
sp|P62827|RAN_MOUSE	Ran	7	-1.13333	-0.372567	0.060251	0.551762	0.109637	0.6528
sp|P62830|RL23_MOUSE	Rpl23	10	-1.39006	-0.652545	0.00906234	0.389003	0.0292756	0.509835
sp|P62843|RS15_MOUSE	Rps15	2	0.600605	1.66265	0.241838	0.0142657	0.328407	0.0412992
sp|P62849|RS24_MOUSE	Rps24	4	-0.266606	1.23014	0.208059	0.051253	0.295645	0.106231
sp|P62855|RS26_MOUSE	Rps26	4	-2.0784	-0.974951	0.00112857	0.0614404	0.00758072	0.121558
sp|P62858|RS28_MOUSE	Rps28	4	0.457998	0.424178	0.222683	0.258656	0.310554	0.377263
sp|P62862|RS30_MOUSE	Fau	4	1.87361	-0.244045	0.0964046	0.520725	0.157252	0.62684
sp|P62869|ELOB_MOUSE	Elob	2	4.84272	5.86589	0.000275387	0.000138576	0.00379845	0.00301585
sp|P62880|GBB2_MOUSE	Gnb2	2	-2.15518	-0.233889	0.000716634	0.329934	0.00613919	0.451001
sp|P62889|RL30_MOUSE	Rpl30	6	-0.605169	-2.2527	0.105817	0.00301569	0.169595	0.0141997
sp|P62908|RS3_MOUSE	Rps3	12	-0.75317	-0.515157	0.054937	0.493801	0.10164	0.60321
sp|P62911|RL32_MOUSE	Rpl32	2	0.827489	-0.571624	0.105234	0.182721	0.168987	0.292283
sp|P62918|RL8_MOUSE	Rpl8	12	-0.756596	0.692162	0.0310143	0.142599	0.0678866	0.238241
sp|P62960|YBOX1_MOUSE	Ybx1	12	-1.73554	-0.643796	0.00438066	0.0853776	0.0175864	0.159745
sp|P62983|RS27A_MOUSE	Rps27a	1	-3.26764	-2.74203	0.000903092	0.00126341	0.00651026	0.00842613
sp|P62996|TRA2B_MOUSE	Tra2b	9	0.0454799	0.167645	0.698085	0.934819	0.758628	0.955632
sp|P63017|HSP7C_MOUSE	Hspa8	18	-1.73883	-1.15942	0.00103022	0.0164774	0.00713266	0.0458815
sp|P63028|TCTP_MOUSE	Tpt1	2	0.168829	0.0417247	0.511662	0.934832	0.60363	0.955632
sp|P63038|CH60_MOUSE	Hspd1	18	-3.65552	-2.47702	0.0139243	0.0431032	0.0380955	0.0945527
sp|P63073|IF4E_MOUSE	Eif4e	3	1.05513	0.100991	0.414715	0.944686	0.511132	0.962137
sp|P63101|1433Z_MOUSE	Ywhaz	8	-2.59827	-0.739848	0.00277628	0.286681	0.0133489	0.405274
sp|P63242|IF5A1_MOUSE	Eif5a	5	-2.34561	-3.90311	0.00365633	0.00642138	0.0157812	0.023089
sp|P63260|ACTG_MOUSE	Actg1	26	-2.1198	-0.831944	0.0159275	0.423816	0.041816	0.536746
sp|P63276|RS17_MOUSE	Rps17	5	-2.00004	-0.950782	0.0011723	0.15345	0.00769441	0.252293
sp|P63323|RS12_MOUSE	Rps12	5	-1.5663	-0.100591	0.00821369	0.419281	0.0276127	0.533454
sp|P63325|RS10_MOUSE	Rps10	10	-0.887647	-0.373816	0.049408	0.4582	0.094448	0.572404
sp|P67778|PHB_MOUSE	Phb	3	-5.52291	0.825484	0.07309	0.648279	0.128334	0.741531
sp|P68033|ACTC_MOUSE	Actc1	4	-1.13419	1.2479	0.0945839	0.242005	0.154893	0.359314
sp|P68040|RACK1_MOUSE	Rack1	6	-1.10491	-1.40547	0.0578332	0.0279707	0.106049	0.0678351
sp|P68254|1433T_MOUSE	Ywhaq	8	-1.97169	0.0204828	0.00651854	0.473086	0.0232364	0.58657
sp|P68369|TBA1A_MOUSE	Tuba1a	1	-3.52772	-7.44899	0.377029	0.326386	0.471714	0.446889
sp|P68372|TBB4B_MOUSE	Tubb4b	8	-2.1332	-1.00734	0.00082698	0.0403794	0.0064192	0.0900102
sp|P68373|TBA1C_MOUSE	Tuba1c	2	-2.64808	-1.74714	0.00238232	0.0275183	0.012391	0.0669343
sp|P68433|H31_MOUSE	Hist1h3a	1	-2.27849	-0.186006	0.47027	0.434713	0.562827	0.548867
sp|P70122|SBDS_MOUSE	Sbds	2	-2.94527	-1.15147	0.010244	0.159758	0.0316112	0.261107
sp|P70168|IMB1_MOUSE	Kpnb1	2	-2.96813	-1.82713	0.0581816	0.117681	0.106452	0.206423
sp|P70280|VAMP7_MOUSE	Vamp7	1	-2.0352	-4.44627	0.00685606	7.89769e-05	0.0243346	0.00237846
sp|P70296|PEBP1_MOUSE	Pebp1	1	-0.904326	-1.62905	0.882743	0.682517	0.905742	0.773207
sp|P70318|TIAR_MOUSE	Tial1	1	-5.23511	-4.73775	1.47451e-05	3.57295e-05	0.000870206	0.00206196
sp|P70349|HINT1_MOUSE	Hint1	4	-1.41343	-0.990043	0.00989218	0.214527	0.030988	0.328544
sp|P70372|ELAV1_MOUSE	Elavl1	18	-5.63749	-6.07526	7.74056e-05	4.26052e-05	0.00236785	0.00206196
sp|P80313|TCPH_MOUSE	Cct7	6	-3.52779	0.0470664	0.0232015	0.668538	0.0552957	0.7625
sp|P80314|TCPB_MOUSE	Cct2	10	-2.74145	-0.720022	0.000669809	0.256905	0.00588684	0.376237
sp|P80315|TCPD_MOUSE	Cct4	4	-1.35477	0.708321	0.0152136	0.449416	0.0405861	0.565704
sp|P80316|TCPE_MOUSE	Cct5	6	-0.395119	1.29298	0.243866	0.206808	0.330246	0.32005
sp|P80317|TCPZ_MOUSE	Cct6a	9	-0.583521	0.930658	0.119095	0.355324	0.18689	0.473458
sp|P80318|TCPG_MOUSE	Cct3	9	-1.6546	-0.922399	0.00389665	0.128539	0.0162754	0.221001
sp|P83882|RL36A_MOUSE	Rpl36a	3	1.53923	-0.961867	0.0885319	0.395069	0.148511	0.514096
sp|P84084|ARF5_MOUSE	Arf5	1	-2.85615	1.09439	0.00038553	0.342317	0.00435001	0.463332
sp|P84089|ERH_MOUSE	Erh	3	-1.66681	-4.67508	0.0604526	0.00214348	0.109637	0.0116622
sp|P84091|AP2M1_MOUSE	Ap2m1	2	-2.56805	-4.16739	0.0158539	0.000824899	0.0417553	0.00675437
sp|P84099|RL19_MOUSE	Rpl19	4	0.842263	-1.75592	0.0990196	0.0118705	0.160866	0.0358282
sp|P84104|SRSF3_MOUSE	Srsf3	8	-2.72963	0.159901	0.00162226	0.637775	0.00951498	0.731539
sp|P84228|H32_MOUSE	Hist1h3b	2	-2.98295	3.26453	0.0268967	0.262471	0.0609412	0.381482
sp|P97311|MCM6_MOUSE	Mcm6	3	-2.08577	-1.65124	0.0078689	0.0167103	0.0268908	0.0463739
sp|P97376|FRG1_MOUSE	Frg1	2	4.07358	0.0939425	0.000272919	0.823463	0.00379845	0.882129
sp|P97450|ATP5J_MOUSE	Atp5j	1	-0.833674	0.426665	0.0293685	0.567377	0.0654656	0.668406
sp|P97461|RS5_MOUSE	Rps5	7	-0.995888	-0.513324	0.0746635	0.961997	0.128908	0.971394
sp|P97801|SMN_MOUSE	Smn1	1	2.63671	3.72819	0.00453274	0.000655575	0.0178503	0.00595781
sp|P97807|FUMH_MOUSE	Fh	2	-0.834875	-1.02521	0.855843	0.971738	0.890292	0.97884
sp|P97820|M4K4_MOUSE	Map4k4	4	-0.431671	0.183934	0.564354	0.413189	0.653671	0.528721
sp|P97822|AN32E_MOUSE	Anp32e	1	-2.81426	-4.10461	0.132014	0.031956	0.204067	0.0746544
sp|P97825|HN1_MOUSE	Hn1	1	-1.56184	-2.59875	0.0251764	0.00921445	0.0589192	0.0296512
sp|P97863|NFIB_MOUSE	Nfib	3	-0.396298	-1.10159	0.725356	0.764011	0.779017	0.834658
sp|P99024|TBB5_MOUSE	Tubb5	27	-2.78182	-1.03405	0.000831551	0.0807324	0.0064192	0.153132
sp|P99027|RLA2_MOUSE	Rplp2	7	-1.73935	0.981196	0.00110801	0.240936	0.00751084	0.359033
sp|Q00PI9|HNRL2_MOUSE	Hnrnpul2	8	-0.186526	-0.119861	0.836158	0.362703	0.874213	0.481469
sp|Q01853|TERA_MOUSE	Vcp	12	-1.52709	-0.805009	0.0380434	0.505224	0.0780693	0.612767
sp|Q02053|UBA1_MOUSE	Uba1	8	-0.933752	0.437186	0.0473236	0.714413	0.0923034	0.798405
sp|Q02257|PLAK_MOUSE	Jup	1	0	8.25214	0.585662	0.852978	0.670834	0.909037
sp|Q03265|ATPA_MOUSE	Atp5a1	18	-2.37619	-0.919699	0.000544573	0.08614	0.00500402	0.160808
sp|Q04447|KCRB_MOUSE	Ckb	22	-1.56741	-0.914646	0.032727	0.350553	0.0701172	0.470629
sp|Q05816|FABP5_MOUSE	Fabp5	4	-0.787197	-2.48149	0.122194	0.0301109	0.190668	0.0713517
sp|Q05920|PYC_MOUSE	Pc	28	-4.34885	-2.93874	1.75198e-05	0.000600581	0.000870206	0.00582146
sp|Q07235|GDN_MOUSE	Serpine2	2	0.640566	2.02971	0.0785328	0.00292425	0.1341	0.0138986
sp|Q08024|PEBB_MOUSE	Cbfb	1	-5.73809	-1.52267	0.011596	0.352576	0.0334143	0.472577
sp|Q1HFZ0|NSUN2_MOUSE	Nsun2	7	0.196879	0.183819	0.721141	0.382459	0.775532	0.502851
sp|Q3TBT3|STING_MOUSE	Tmem173	1	-0.0511952	1.8222	0.534231	0.0700517	0.623144	0.135357
sp|Q3TDQ1|STT3B_MOUSE	Stt3b	1	2.92306	4.91217	0.00644982	0.00051992	0.0230909	0.00558407
sp|Q3TFD2|PCAT1_MOUSE	Lpcat1	1	1.05289	2.83348	0.781597	0.0101831	0.828693	0.0316595
sp|Q3THE2|ML12B_MOUSE	Myl12b	2	-0.329698	0.759485	0.684566	0.45556	0.747094	0.571189
sp|Q3THK7|GUAA_MOUSE	Gmps	1	1.52081	0.936329	0.0663191	0.263565	0.117406	0.382401
sp|Q3TKT4|SMCA4_MOUSE	Smarca4	3	-2.04675	0.547714	0.032695	0.715486	0.0701172	0.798525
sp|Q3TLH4|PRC2C_MOUSE	Prrc2c	3	-1.82685	-4.09585	0.429531	0.0448557	0.527035	0.0972139
sp|Q3TWW8|SRSF6_MOUSE	Srsf6	3	-0.432489	0.901744	0.596152	0.0750786	0.678154	0.143065
sp|Q3U1J4|DDB1_MOUSE	Ddb1	2	-5.42812	-3.74326	0.00289501	0.00991914	0.0137596	0.0311181
sp|Q3U9G9|LBR_MOUSE	Lbr	1	3.89744	2.10268	0.00121188	0.0121048	0.00788307	0.0364024
sp|Q3UEB3|PUF60_MOUSE	Puf60	4	-2.82484	-4.05494	0.000394499	0.000185717	0.00435001	0.00348925
sp|Q3UFY8|MRRP1_MOUSE	Trmt10c	2	1.03186	-0.25245	0.0914649	0.929514	0.152312	0.954917
sp|Q3UKJ7|SMU1_MOUSE	Smu1	2	2.60068	0.584454	0.0228018	0.289263	0.0546582	0.407531
sp|Q3UL36|ARGL1_MOUSE	Arglu1	2	-2.36984	-4.28215	0.00446034	0.000356182	0.0177341	0.00480549
sp|Q3ULD5|MCCB_MOUSE	Mccc2	22	-4.64527	-4.25842	1.76789e-05	2.48923e-05	0.000870206	0.00206196
sp|Q3UZ39|LRRF1_MOUSE	Lrrfip1	1	9.47862	0	0.262437	0.958098	0.353641	0.971013
sp|Q4VA53|PDS5B_MOUSE	Pds5b	2	2.4211	3.53509	0.0247081	0.00694618	0.0583817	0.0247607
sp|Q4VAA2|CDV3_MOUSE	Cdv3	2	3.90905	2.19254	0.31796	0.751693	0.409584	0.825565
sp|Q52KI8|SRRM1_MOUSE	Srrm1	3	1.19345	-0.200519	0.06644	0.704587	0.117406	0.789558
sp|Q569Z5|DDX46_MOUSE	Ddx46	5	-1.10678	-0.586739	0.0137332	0.186052	0.0378578	0.295327
sp|Q569Z6|TR150_MOUSE	Thrap3	11	-1.17989	-0.994044	0.0301612	0.128228	0.0666933	0.220926
sp|Q5HZJ0|RNC_MOUSE	Drosha	2	0.866695	1.43276	0.212305	0.110266	0.300615	0.195687
sp|Q5SQX6|CYFP2_MOUSE	Cyfip2	1	4.79844	6.12186	0.00271065	0.000712803	0.0133489	0.00627115
sp|Q5SSK3|TEFM_MOUSE	Tefm	1	-3.6619	2.83664	0.15322	0.608473	0.229969	0.702804
sp|Q5SUF2|LC7L3_MOUSE	Luc7l3	2	-1.62833	-0.156875	0.00378303	0.845009	0.0159983	0.902871
sp|Q5SWU9|ACACA_MOUSE	Acaca	64	-3.51785	-2.31003	8.61716e-05	0.00273951	0.00245599	0.0134816
sp|Q60605|MYL6_MOUSE	Myl6	3	-1.89205	0.538356	0.0915347	0.850099	0.152312	0.907138
sp|Q60668|HNRPD_MOUSE	Hnrnpd	14	-2.11858	-1.60962	0.00412276	0.0214568	0.0167133	0.0554523
sp|Q60817|NACA_MOUSE	Naca	2	-0.547423	1.90917	0.333089	0.960532	0.425667	0.971394
sp|Q60864|STIP1_MOUSE	Stip1	3	1.0013	0.741367	0.735272	0.744259	0.787655	0.819577
sp|Q60900|ELAV3_MOUSE	Elavl3	1	-5.92544	-6.27341	0.014486	0.0149007	0.039337	0.0424926
sp|Q60930|VDAC2_MOUSE	Vdac2	4	0.0807519	0.437737	0.684761	0.782552	0.747094	0.848192
sp|Q60931|VDAC3_MOUSE	Vdac3	2	-0.44625	0.890811	0.158011	0.0462365	0.235876	0.0993183
sp|Q60932|VDAC1_MOUSE	Vdac1	10	-1.43257	0.379176	0.00559983	0.731923	0.0210503	0.810309
sp|Q60972|RBBP4_MOUSE	Rbbp4	1	-6.53654	-4.99498	0.000341602	0.000934142	0.00409293	0.0071531
sp|Q60973|RBBP7_MOUSE	Rbbp7	4	-3.25551	-3.34809	0.000522511	0.000442706	0.00496686	0.0054547
sp|Q61029|LAP2B_MOUSE	Tmpo	2	0.0356639	-3.4873	0.439787	0.0947402	0.53882	0.173725
sp|Q61035|SYHC_MOUSE	Hars	1	5.40774	10.4418	0.592039	0.0556811	0.675333	0.112863
sp|Q61166|MARE1_MOUSE	Mapre1	2	2.82246	4.63951	0.00217519	0.000175162	0.0117574	0.00346082
sp|Q61171|PRDX2_MOUSE	Prdx2	5	0.269626	1.26239	0.681228	0.515281	0.746193	0.622099
sp|Q61316|HSP74_MOUSE	Hspa4	7	-1.10534	1.14203	0.282555	0.228533	0.37328	0.344812
sp|Q61329|ZFHX3_MOUSE	Zfhx3	1	-3.8935	-1.90407	0.000194963	0.0136303	0.00335906	0.0401147
sp|Q61545|EWS_MOUSE	Ewsr1	2	1.43349	-1.0048	0.00981676	0.0933357	0.0308687	0.171912
sp|Q61553|FSCN1_MOUSE	Fscn1	7	-1.58551	0.202772	0.0574557	0.870783	0.105591	0.923009
sp|Q61595|KTN1_MOUSE	Ktn1	3	1.58572	-0.0335667	0.16305	0.740857	0.241652	0.816918
sp|Q61598|GDIB_MOUSE	Gdi2	4	-2.42867	0.596573	0.194445	0.568765	0.278694	0.669087
sp|Q61701|ELAV4_MOUSE	Elavl4	2	-6.03084	-4.84752	0.00106719	0.00885627	0.00729393	0.0288352
sp|Q61753|SERA_MOUSE	Phgdh	7	-1.95692	-1.44617	0.00481461	0.0738562	0.0185195	0.141387
sp|Q61768|KINH_MOUSE	Kif5b	2	3.45273	2.4727	0.0848965	0.283634	0.143577	0.402342
sp|Q61881|MCM7_MOUSE	Mcm7	2	-6.33064	-3.33849	8.01691e-05	0.0317755	0.00236785	0.0744428
sp|Q61937|NPM_MOUSE	Npm1	11	-0.339186	1.22076	0.265989	0.194476	0.357099	0.30403
sp|Q61990|PCBP2_MOUSE	Pcbp2	11	-6.82603	-5.49652	9.96126e-07	1.62535e-05	0.000137299	0.00192024
sp|Q62093|SRSF2_MOUSE	Srsf2	6	0.635345	0.906877	0.32307	0.0334032	0.415519	0.0773986
sp|Q62095|DDX3Y_MOUSE	Ddx3y	1	0.353113	-0.867027	0.713289	0.228902	0.769088	0.344812
sp|Q62167|DDX3X_MOUSE	Ddx3x	21	0.0743967	0.963249	0.854478	0.0504533	0.889992	0.105438
sp|Q62188|DPYL3_MOUSE	Dpysl3	2	-2.12223	-3.62989	0.381721	0.0303246	0.476143	0.0716527
sp|Q62189|SNRPA_MOUSE	Snrpa	1	4.62405	1.39457	9.57977e-05	0.492286	0.00255563	0.602249
sp|Q62261|SPTB2_MOUSE	Sptbn1	2	-1.12497	-0.252194	0.092483	0.79261	0.153273	0.856848
sp|Q62318|TIF1B_MOUSE	Trim28	5	-2.45932	-2.38379	0.0379993	0.0590511	0.0780693	0.117429
sp|Q62376|RU17_MOUSE	Snrnp70	3	0.258919	2.05355	0.81223	0.157494	0.855687	0.257916
sp|Q62425|NDUA4_MOUSE	Ndufa4	1	-4.43301	3.07969	0.0276536	0.0335051	0.0623147	0.0773986
sp|Q64012|RALY_MOUSE	Raly	9	-3.56038	-4.95875	0.00039433	7.10457e-05	0.00435001	0.00237846
sp|Q64152|BTF3_MOUSE	Btf3	3	-0.218784	0.31193	0.489705	0.589541	0.581041	0.684762
sp|Q64523|H2A2C_MOUSE	Hist2h2ac	2	-0.399794	0.94404	0.906754	0.0309789	0.925785	0.0727827
sp|Q64727|VINC_MOUSE	Vcl	2	-4.07249	-3.89261	0.00313264	0.00275501	0.0142637	0.0134816
sp|Q68FD5|CLH1_MOUSE	Cltc	19	-1.64883	-0.747559	0.013294	0.09893	0.0370174	0.18021
sp|Q68FL6|SYMC_MOUSE	Mars	5	0.295285	0.642661	0.741361	0.317027	0.793151	0.437699
sp|Q69Z36|MEX3B_MOUSE	Mex3b	3	3.22887	0.776356	0.00139797	0.281154	0.00850086	0.399509
sp|Q6A0A9|F120A_MOUSE	FAM120A	5	-0.693495	0.220426	0.590735	0.730329	0.674776	0.809627
sp|Q6DFW4|NOP58_MOUSE	Nop58	7	-0.7873	0.212919	0.0397784	0.68731	0.0810264	0.777572
sp|Q6IRU2|TPM4_MOUSE	Tpm4	4	-3.20587	-4.04731	0.00378615	0.000750545	0.0159983	0.00633368
sp|Q6NV83|SR140_MOUSE	U2surp	5	-0.375056	-2.50517	0.726266	0.0668811	0.779017	0.130168
sp|Q6NVF9|CPSF6_MOUSE	Cpsf6	2	-3.96554	-3.71061	0.000904416	0.000353268	0.00651026	0.00480549
sp|Q6NZJ6|IF4G1_MOUSE	Eif4g1	4	-2.32655	-1.83976	0.0217388	0.0322007	0.0531894	0.0750141
sp|Q6NZN0|RBM26_MOUSE	Rbm26	1	2.79095	-0.574163	0.473869	0.360044	0.566314	0.478708
sp|Q6P4T2|U520_MOUSE	Snrnp200	10	0.0563943	0.455488	0.82349	0.564722	0.863152	0.666226
sp|Q6P5F9|XPO1_MOUSE	Xpo1	1	-1.63934	3.8816	0.622937	0.00734875	0.70091	0.0256686
sp|Q6P5H2|NEST_MOUSE	Nes	23	-1.14778	0.0132089	0.0251592	0.81782	0.0589192	0.878359
sp|Q6P9S0|MTSSL_MOUSE	Mtss1l	2	-1.44251	-3.04272	0.654904	0.531888	0.724069	0.636573
sp|Q6PAC3|DCA13_MOUSE	Dcaf13	3	1.78998	2.62171	0.0354308	0.00467208	0.0739057	0.0188029
sp|Q6PB66|LPPRC_MOUSE	Lrpprc	42	-5.97417	-5.23742	5.25117e-06	1.44917e-05	0.000450386	0.00192024
sp|Q6PE01|SNR40_MOUSE	Snrnp40	3	3.30848	3.75595	0.00620029	0.00182122	0.0225138	0.0104699
sp|Q6PFR5|TRA2A_MOUSE	Tra2a	1	0.0420916	-4.13713	0.869715	0.00578225	0.89894	0.0215402
sp|Q6PIC6|AT1A3_MOUSE	Atp1a3	2	-1.82719	-3.60766	0.00997761	0.00402437	0.0311377	0.0172443
sp|Q6ZQ38|CAND1_MOUSE	Cand1	3	-3.88351	-2.94415	0.000474749	0.00698596	0.00478802	0.0247957
sp|Q6ZWN5|RS9_MOUSE	Rps9	14	-1.63962	-0.693546	0.00245255	0.203753	0.0125201	0.317931
sp|Q6ZWU9|RS27_MOUSE	Rps27	2	1.37058	-0.146127	0.0708599	0.25476	0.124683	0.374887
sp|Q6ZWV3|RL10_MOUSE	Rpl10	10	-0.403518	0.659726	0.284759	0.126894	0.375591	0.219084
sp|Q6ZWV7|RL35_MOUSE	Rpl35	3	0.339061	-0.462701	0.514551	0.535655	0.606173	0.63923
sp|Q76MZ3|2AAA_MOUSE	Ppp2r1a	8	-3.817	-2.39926	0.00576184	0.0273398	0.0214642	0.0669343
sp|Q78PY7|SND1_MOUSE	Snd1	13	-0.152224	0.810973	0.550009	0.119572	0.638845	0.209061
sp|Q78ZA7|NP1L4_MOUSE	Nap1l4	4	-1.37909	-0.476452	0.0309141	0.269345	0.0678866	0.387388
sp|Q791V5|MTCH2_MOUSE	Mtch2	1	-2.70495	-0.613254	0.0385844	0.147376	0.0789834	0.24376
sp|Q7M724|TR106_MOUSE	Tas2r106	1	-0.491264	3.58843	0.70741	0.00051514	0.766712	0.00558407
sp|Q7TMF2|ERI1_MOUSE	Eri1	1	2.08559	0.786248	0.0456644	0.174593	0.0896242	0.280912
sp|Q7TMM9|TBB2A_MOUSE	Tubb2a	1	-3.13337	-5.25711	0.00242772	0.000234509	0.0125201	0.00364138
sp|Q7TNC4|LC7L2_MOUSE	Luc7l2	19	-2.12851	-1.84021	0.00607381	0.00846175	0.0222258	0.0276596
sp|Q7TNV0|DEK_MOUSE	Dek	6	-0.0517938	-0.36819	0.693303	0.347871	0.754423	0.467788
sp|Q7TPD0|INT3_MOUSE	Ints3	1	4.04836	-0.24245	0.0738532	0.79784	0.128458	0.860664
sp|Q7TPR4|ACTN1_MOUSE	Actn1	2	-7.10168	-4.75709	0.000755464	0.00757207	0.00618583	0.0259838
sp|Q7TSC1|PRC2A_MOUSE	Prrc2a	3	2.36564	1.07796	0.00230544	0.0837044	0.012144	0.157685
sp|Q80U58|PUM2_MOUSE	Pum2	1	-0.703457	-1.96405	0.162315	0.00251118	0.240995	0.0126631
sp|Q80UU9|PGRC2_MOUSE	Pgrmc2	1	-6.78783	-6.44051	0.00195246	0.0023177	0.0110123	0.0120602
sp|Q80VD1|FA98B_MOUSE	Fam98b	6	-2.02238	-2.7592	0.0155329	0.00510346	0.0410405	0.019953
sp|Q80VI1|TRI56_MOUSE	Trim56	2	0.386884	1.10532	0.113197	0.183336	0.178993	0.292701
sp|Q80WJ7|LYRIC_MOUSE	Mtdh	2	1.59174	2.19624	0.0203072	0.00775197	0.0507373	0.0263822
sp|Q80WV3|CHST2_MOUSE	Chst2	1	3.31584	-0.0589075	0.615758	0.7566	0.695673	0.828752
sp|Q80X50|UBP2L_MOUSE	Ubap2l	2	0.0852577	-0.637276	0.572255	0.24171	0.660049	0.359314
sp|Q80XU3|NUCKS_MOUSE	Nucks1	1	-4.61884	-2.35139	0.000271421	0.00536275	0.00379845	0.020344
sp|Q80YR5|SAFB2_MOUSE	Safb2	2	2.96577	2.83223	0.0863695	0.0450438	0.145178	0.0972139
sp|Q810D6|GRWD1_MOUSE	Grwd1	2	2.6472	4.34892	0.000294053	4.17971e-05	0.00386003	0.00206196
sp|Q811B5|PRR3_MOUSE	Prr3	1	0.698514	-0.548253	0.145903	0.90761	0.220992	0.94374
sp|Q812E0|CPEB2_MOUSE	Cpeb2	2	-7.07128	-7.13615	0.00100541	0.000150832	0.00704636	0.00319841
sp|Q8BFR5|EFTU_MOUSE	Tufm	2	-7.20558	-5.61565	0.000103954	0.000498191	0.00268655	0.00549339
sp|Q8BFY9|TNPO1_MOUSE	Tnpo1	2	-3.35635	0.393985	0.00503349	0.451635	0.0190949	0.567633
sp|Q8BG81|PDIP3_MOUSE	Poldip3	4	-2.91958	-4.50246	0.00760794	0.000836351	0.0262157	0.006781
sp|Q8BGD9|IF4B_MOUSE	Eif4b	3	-6.24697	-2.44584	0.00852274	0.273064	0.0284206	0.391161
sp|Q8BGJ9|U2AF4_MOUSE	U2af1l4	2	-2.67349	-1.20993	0.00139781	0.0422405	0.00850086	0.0929067
sp|Q8BGQ7|SYAC_MOUSE	Aars	3	-2.30374	-0.116479	0.00637165	0.72663	0.022984	0.806608
sp|Q8BH58|TIPRL_MOUSE	Tiprl	1	-0.746931	0.0981762	0.117584	0.932799	0.185222	0.955632
sp|Q8BHD7|PTBP3_MOUSE	Ptbp3	6	-5.94702	-4.85436	1.16807e-05	8.597e-05	0.000743075	0.00237846
sp|Q8BHG1|NRDC_MOUSE	Nrdc	2	-4.90615	-4.27459	0.000471263	0.00136904	0.00478802	0.00877673
sp|Q8BHN3|GANAB_MOUSE	Ganab	5	-1.48049	-0.360622	0.0325142	0.432043	0.0701172	0.54633
sp|Q8BJW6|EIF2A_MOUSE	Eif2a	1	12.3751	8.14628	0.0294899	0.340298	0.0655596	0.461355
sp|Q8BJZ4|RT35_MOUSE	Mrps35	1	-3.94	-4.40293	0.345244	0.193642	0.435904	0.303299
sp|Q8BKC5|IPO5_MOUSE	Ipo5	2	1.71034	4.68579	0.759683	0.33228	0.80753	0.453458
sp|Q8BL97|SRSF7_MOUSE	Srsf7	5	-0.965306	1.34088	0.0255571	0.0506401	0.0592036	0.10549
sp|Q8BMA6|SRP68_MOUSE	Srp68	2	1.50152	2.80945	0.0774009	0.00363826	0.132802	0.0161766
sp|Q8BMC4|NOP9_MOUSE	Nop9	1	10.5085	3.31913	0.301382	0.908364	0.392509	0.94374
sp|Q8BMJ2|SYLC_MOUSE	Lars	2	1.86617	-0.363869	0.00133441	0.549788	0.00829743	0.651397
sp|Q8BMJ3|IF1AX_MOUSE	Eif1ax	2	-0.509749	0.25535	0.13106	0.948934	0.202971	0.965275
sp|Q8BMK4|CKAP4_MOUSE	Ckap4	2	0.898381	3.65527	0.323721	0.000545744	0.415711	0.00561447
sp|Q8BNV1|TRM2A_MOUSE	Trmt2a	8	0.520913	0.979007	0.618912	0.749289	0.698282	0.824019
sp|Q8BP47|SYNC_MOUSE	Nars	3	4.38598	5.76929	1.89404e-05	1.14189e-05	0.000870206	0.00188868
sp|Q8BP48|MAP11_MOUSE	Metap1	2	1.45119	1.94163	0.0227225	0.0058485	0.0546264	0.0215535
sp|Q8BPU7|ELMO1_MOUSE	Elmo1	1	-1.1737	0.0468817	0.0105452	0.876088	0.0320621	0.924138
sp|Q8BRH0|TMTC3_MOUSE	Tmtc3	1	-0.452279	3.30402	0.887949	0.0178375	0.909955	0.0483659
sp|Q8BSY0|ASPH_MOUSE	Asph	2	-6.82397	-6.16254	0.000273231	0.000245149	0.00379845	0.00368616
sp|Q8BTI8|SRRM2_MOUSE	Srrm2	4	-3.08123	-3.13967	0.000736215	0.00175093	0.00615531	0.0102261
sp|Q8BTM8|FLNA_MOUSE	Flna	2	-5.75131	-5.91188	0.000182007	0.000285038	0.00327217	0.00413556
sp|Q8BUR4|DOCK1_MOUSE	Dock1	3	-0.574572	0.85668	0.0707476	0.185226	0.124683	0.295148
sp|Q8BVI4|DHPR_MOUSE	Qdpr	2	-3.69518	-1.32808	0.0149692	0.466627	0.0401931	0.580301
sp|Q8BW56|GTDC1_MOUSE	Gtdc1	2	-1.22132	-0.153525	0.527155	0.681416	0.615759	0.773019
sp|Q8BWL5|RBMS3_MOUSE	Rbms3	1	-1.5472	-3.52326	0.0654048	0.000853498	0.116824	0.00685284
sp|Q8BWY3|ERF1_MOUSE	Etf1	1	0	0	0.272686	0.257497	0.362342	0.376237
sp|Q8C0C7|SYFA_MOUSE	Farsa	6	2.0863	1.50173	0.074634	0.291255	0.128908	0.409036
sp|Q8C1B7|SEP11_MOUSE	Septin11	3	0.101298	1.53716	0.989379	0.00661581	0.991777	0.0236852
sp|Q8C2Q3|RBM14_MOUSE	Rbm14	8	-2.30198	-0.160239	0.00725505	0.778646	0.0254234	0.845552
sp|Q8C3F2|F120C_MOUSE	Fam120c	8	-1.96084	-1.48204	0.010975	0.0347539	0.0322546	0.07896
sp|Q8C4J7|TBL3_MOUSE	Tbl3	2	3.19007	2.70124	0.547026	0.726342	0.636274	0.806608
sp|Q8C5Q4|GRSF1_MOUSE	Grsf1	1	-2.94198	6.03003	0.000462809	3.38754e-05	0.00478429	0.00206196
sp|Q8C6B9|AROS_MOUSE	Rps19bp1	1	11.0056	9.14917	8.44068e-07	0.0463821	0.000137299	0.0993731
sp|Q8C7Q4|RBM4_MOUSE	Rbm4	3	-1.0768	3.46292	0.0548142	0.000360267	0.10164	0.00480549
sp|Q8C8R3|ANK2_MOUSE	Ank2	5	0.767713	2.27041	0.822864	0.053422	0.863152	0.109417
sp|Q8CAY6|THIC_MOUSE	Acat2	3	-1.46776	-2.56752	0.0511125	0.00410735	0.0967808	0.0173367
sp|Q8CB77|ELOA1_MOUSE	Eloa	2	4.00235	4.96688	0.0170338	0.0140598	0.0440217	0.0410865
sp|Q8CCF0|PRP31_MOUSE	Prpf31	3	-1.4279	0.854441	0.0100631	0.0379291	0.0312865	0.0852374
sp|Q8CD10|MICU2_MOUSE	Micu2	1	5.31006	1.7765	0.0262711	0.77671	0.0602591	0.845183
sp|Q8CFQ3|AQR_MOUSE	Aqr	3	-1.56427	-1.97932	0.0118794	0.00511649	0.0339941	0.019953
sp|Q8CGC4|LS14B_MOUSE	Lsm14b	1	0.477223	-0.936401	0.147409	0.335404	0.222755	0.456216
sp|Q8CGC7|SYEP_MOUSE	Eprs	11	0.19665	-0.637596	0.543519	0.24429	0.633085	0.362058
sp|Q8CGF7|TCRG1_MOUSE	Tcerg1	2	1.77996	2.42528	0.0104238	0.00313808	0.0319278	0.0145748
sp|Q8CHP5|PYM1_MOUSE	Pym1	2	1.87558	0.855324	0.00783294	0.0553466	0.026879	0.112461
sp|Q8CI11|GNL3_MOUSE	Gnl3	3	0.84491	2.66627	0.757302	0.187011	0.806035	0.29628
sp|Q8CI51|PDLI5_MOUSE	Pdlim5	2	3.61438	3.06797	0.000960234	0.00412309	0.0068458	0.0173367
sp|Q8CI75|DI3L2_MOUSE	Dis3l2	4	-6.01998	-5.20497	5.99063e-06	3.12426e-05	0.000450386	0.00206196
sp|Q8CIB5|FERM2_MOUSE	Fermt2	2	-0.124615	2.50938	0.52324	0.0840938	0.61205	0.157756
sp|Q8CIE6|COPA_MOUSE	Copa	3	-0.472111	-0.578429	0.340146	0.0941292	0.430782	0.172988
sp|Q8CIG8|ANM5_MOUSE	Prmt5	1	-1.70664	-1.80198	0.225394	0.139073	0.313482	0.233766
sp|Q8JZK9|HMCS1_MOUSE	Hmgcs1	5	-1.03587	0.687791	0.104236	0.584758	0.168038	0.680161
sp|Q8JZQ9|EIF3B_MOUSE	Eif3b	1	-0.830204	-0.155041	0.0434253	0.396203	0.0865366	0.514096
sp|Q8K019|BCLF1_MOUSE	Bclaf1	4	-0.41253	1.91792	0.683471	0.49791	0.747094	0.606439
sp|Q8K0T0|RTN1_MOUSE	Rtn1	3	-2.46934	1.46058	0.0333245	0.765019	0.0706711	0.834658
sp|Q8K1M6|DNM1L_MOUSE	Dnm1l	2	-2.06265	-3.92316	0.0486365	0.0109081	0.0939775	0.0335353
sp|Q8K1N4|SPAS2_MOUSE	Spats2	2	2.3182	3.19527	0.0124377	0.00334381	0.0351057	0.0150314
sp|Q8K273|MMGT1_MOUSE	Mmgt1	1	-2.93667	2.92779	0.00336573	0.00755057	0.0148921	0.0259838
sp|Q8K2B3|SDHA_MOUSE	Sdha	1	2.12942	0.424613	0.0527509	0.307272	0.0986991	0.427082
sp|Q8K2F8|LS14A_MOUSE	Lsm14a	4	-2.50836	-1.32808	0.00205543	0.131999	0.0111832	0.22601
sp|Q8K301|DDX52_MOUSE	Ddx52	3	0.988251	3.11821	0.237183	0.00636151	0.325291	0.0230744
sp|Q8K310|MATR3_MOUSE	Matr3	27	-5.05077	-4.26803	1.82421e-05	9.92817e-05	0.000870206	0.00256581
sp|Q8K3H0|DP13A_MOUSE	Appl1	1	-1.19089	-1.17627	0.468052	0.492116	0.562827	0.602249
sp|Q8K4F6|NSUN5_MOUSE	Nsun5	3	1.49256	0.93209	0.0249449	0.0734028	0.0587733	0.141172
sp|Q8K4L0|DDX54_MOUSE	Ddx54	2	2.31905	1.44637	0.228512	0.524221	0.316548	0.629217
sp|Q8K4Z5|SF3A1_MOUSE	Sf3a1	2	-0.687667	-0.75777	0.140399	0.22525	0.214621	0.34243
sp|Q8QZT1|THIL_MOUSE	Acat1	3	0.711975	3.62564	0.45533	0.00234113	0.550523	0.0120761
sp|Q8QZY1|EIF3L_MOUSE	Eif3l	2	-0.875313	-1.46301	0.170964	0.0516508	0.251132	0.106788
sp|Q8R010|AIMP2_MOUSE	Aimp2	1	0.208318	0.869119	0.590267	0.338466	0.674776	0.459624
sp|Q8R0X7|SGPL1_MOUSE	Sgpl1	3	1.98328	2.89079	0.306266	0.0488464	0.397865	0.103315
sp|Q8R1B4|EIF3C_MOUSE	Eif3c	3	-1.33984	-4.54162	0.0450852	0.00074098	0.0887749	0.00633368
sp|Q8R1F1|NIBL1_MOUSE	Fam129b	1	-1.77377	-1.58068	0.112933	0.06442	0.178918	0.126846
sp|Q8R1F9|RPP40_MOUSE	Rpp40	1	-1.21771	-2.53236	0.112701	0.0116598	0.178894	0.035451
sp|Q8R1I1|QCR9_MOUSE	Uqcr10	1	-1.90134	-3.55891	0.0252767	0.00735605	0.0589192	0.0256686
sp|Q8R2N0|TAP26_MOUSE	Ccdc59	2	1.94383	2.00167	0.0863538	0.0584699	0.145178	0.116799
sp|Q8R317|UBQL1_MOUSE	Ubqln1	1	-1.78704	-2.60458	0.0044091	0.00287819	0.0176151	0.0138387
sp|Q8R5C5|ACTY_MOUSE	Actr1b	3	-0.900694	1.76249	0.145226	0.240947	0.220371	0.359033
sp|Q8VBV3|EXOS2_MOUSE	Exosc2	1	-2.15637	1.55907	0.263816	0.265743	0.354757	0.384885
sp|Q8VCM8|NCLN_MOUSE	Ncln	2	-2.3181	-0.364093	0.185402	0.480933	0.268055	0.59363
sp|Q8VD75|HIP1_MOUSE	Hip1	3	-0.905071	-0.39616	0.0621892	0.392481	0.112294	0.512937
sp|Q8VDD5|MYH9_MOUSE	Myh9	15	-1.48096	0.00504648	0.0448137	0.893918	0.0884509	0.935785
sp|Q8VDJ3|VIGLN_MOUSE	Hdlbp	22	-3.48394	-2.45585	0.000114758	0.000870057	0.00271157	0.00691862
sp|Q8VDM6|HNRL1_MOUSE	Hnrnpul1	3	-0.912264	0.366978	0.0768091	0.887418	0.132196	0.931338
sp|Q8VEM8|MPCP_MOUSE	Slc25a3	1	-2.35664	1.01618	0.0740924	0.046718	0.128458	0.0996034
sp|Q8VH51|RBM39_MOUSE	Rbm39	7	-1.6713	-0.518137	0.0091051	0.368386	0.0292993	0.487448
sp|Q8VHK9|DHX36_MOUSE	Dhx36	5	-0.314688	-0.162522	0.577325	0.999476	0.663122	0.999476
sp|Q91V41|RAB14_MOUSE	Rab14	2	2.25452	1.2958	0.45084	0.872928	0.547496	0.923009
sp|Q91V81|RBM42_MOUSE	Rbm42	3	0.765954	0.212884	0.215721	0.572366	0.303921	0.672367
sp|Q91V92|ACLY_MOUSE	Acly	7	-1.43643	0.440004	0.0189402	0.692599	0.0477547	0.778379
sp|Q91VI7|RINI_MOUSE	Rnh1	1	-2.48523	-0.116701	0.00223435	0.482713	0.0119213	0.594938
sp|Q91VR2|ATPG_MOUSE	Atp5c1	1	-0.885692	-0.740667	0.0851641	0.0841236	0.143736	0.157756
sp|Q91VR5|DDX1_MOUSE	Ddx1	12	0.13631	0.620185	0.631565	0.538602	0.709652	0.640897
sp|Q91W18|TDRD3_MOUSE	Tdrd3	1	0.820245	-1.34697	0.774836	0.0250733	0.822579	0.0632185
sp|Q91W50|CSDE1_MOUSE	Csde1	17	0.126954	-1.64998	0.877496	0.00495825	0.901688	0.0196195
sp|Q91WJ8|FUBP1_MOUSE	Fubp1	13	-1.55545	-1.91661	0.018819	0.00521988	0.0477401	0.0200783
sp|Q91WK2|EIF3H_MOUSE	Eif3h	3	-0.386237	-0.541371	0.214452	0.365497	0.302649	0.4844
sp|Q91X84|CRTC3_MOUSE	Crtc3	1	-13.2947	-4.76095	0.143959	0.890693	0.21885	0.933591
sp|Q91XV3|BASP1_MOUSE	Basp1	2	-1.60822	-3.45754	0.11848	0.0181686	0.186279	0.0489427
sp|Q91XZ4|PCDB6_MOUSE	Pcdhb6	1	0.592101	1.17617	0.668214	0.13895	0.733882	0.233766
sp|Q91YE6|IPO9_MOUSE	Ipo9	1	-3.02094	-0.926537	0.0733402	0.144055	0.128438	0.239705
sp|Q91YK2|RRP1B_MOUSE	Rrp1b	2	2.24449	3.30191	0.182081	0.124095	0.264203	0.21515
sp|Q91Z31|PTBP2_MOUSE	Ptbp2	17	-6.32253	-5.2912	3.80741e-06	2.60213e-05	0.000397058	0.00206196
sp|Q91Z67|SRGP2_MOUSE	Srgap2	2	0.505317	-2.16392	0.938699	0.273057	0.951353	0.391161
sp|Q91ZA3|PCCA_MOUSE	Pcca	26	-4.37751	-3.85978	4.44615e-05	6.50599e-05	0.00175093	0.00237846
sp|Q91ZU6|DYST_MOUSE	Dst	2	1.50908	2.16078	0.413465	0.109499	0.510352	0.194873
sp|Q920E5|FPPS_MOUSE	Fdps	7	-1.1675	-0.257814	0.0189149	0.470497	0.0477547	0.584236
sp|Q920L1|FADS1_MOUSE	Fads1	1	-1.49526	-0.790041	0.0787714	0.913908	0.1341	0.948308
sp|Q920Q6|MSI2H_MOUSE	Msi2	2	0.313739	1.36918	0.637571	0.0180503	0.714459	0.048783
sp|Q921M3|SF3B3_MOUSE	Sf3b3	2	-1.12888	0.226554	0.520393	0.316842	0.61103	0.437699
sp|Q922B2|SYDC_MOUSE	Dars	10	0.196661	-0.663761	0.336635	0.998144	0.42699	0.999476
sp|Q922K7|NOP2_MOUSE	Nop2	2	4.43356	1.41795	0.0110168	0.583966	0.0322546	0.680161
sp|Q922P9|GLYR1_MOUSE	Glyr1	2	1.26656	3.22942	0.0362805	0.00260646	0.0751979	0.0130639
sp|Q922Q8|LRC59_MOUSE	Lrrc59	2	0.508624	2.74609	0.187492	0.00182306	0.270132	0.0104699
sp|Q922R8|PDIA6_MOUSE	Pdia6	1	-1.2702	-2.99856	0.908176	0.417569	0.926093	0.532095
sp|Q922U1|PRPF3_MOUSE	Prpf3	2	2.23538	1.35216	0.0215428	0.130078	0.0528661	0.223183
sp|Q923D4|SF3B5_MOUSE	Sf3b5	1	-1.44449	-4.37341	0.185381	0.00153634	0.268055	0.00952253
sp|Q923D5|WBP11_MOUSE	Wbp11	2	-0.75102	-3.65873	0.572105	0.534974	0.660049	0.63923
sp|Q99020|ROAA_MOUSE	Hnrnpab	32	0.558353	1.13645	0.520154	0.256382	0.61103	0.376237
sp|Q99JI4|PSMD6_MOUSE	Psmd6	1	-5.10165	-4.39606	0.0086615	0.00977037	0.0284629	0.0309582
sp|Q99JI6|RAP1B_MOUSE	Rap1b	1	-0.0183628	2.2714	0.574418	0.506621	0.6607	0.613434
sp|Q99JY9|ARP3_MOUSE	Actr3	4	-2.29059	0.270412	0.238931	0.277916	0.326605	0.396269
sp|Q99K85|SERC_MOUSE	Psat1	2	-2.64511	0.372628	0.142557	0.807952	0.217117	0.86889
sp|Q99KF1|TMED9_MOUSE	Tmed9	1	-1.56181	-4.82389	0.0488509	0.00734769	0.0941718	0.0256686
sp|Q99KG3|RBM10_MOUSE	Rbm10	1	3.14271	4.35455	0.00496202	0.000490553	0.0189106	0.00548226
sp|Q99KI0|ACON_MOUSE	Aco2	6	-1.48115	-0.757679	0.00971575	0.343727	0.0307623	0.46397
sp|Q99LC5|ETFA_MOUSE	Etfa	2	-0.665705	2.66667	0.426511	0.186004	0.524108	0.295327
sp|Q99LF4|RTCB_MOUSE	Rtcb	11	-0.237482	-0.259586	0.166199	0.326241	0.245441	0.446889
sp|Q99LH1|NOG2_MOUSE	Gnl2	2	-1.7982	0.523733	0.0739744	0.239779	0.128458	0.358585
sp|Q99LI8|HGS_MOUSE	Hgs	1	-3.14246	-3.01907	0.0323075	0.0267978	0.0701172	0.0662057
sp|Q99LT0|DPY30_MOUSE	Dpy30	1	-2.57184	0.171519	0.000855517	0.311349	0.0064192	0.432024
sp|Q99M28|RNPS1_MOUSE	Rnps1	3	-2.56293	-1.6911	0.000284246	0.00287534	0.00379845	0.0138387
sp|Q99M31|HSP7E_MOUSE	Hspa14	3	3.9631	2.19784	0.00867309	0.182122	0.0284629	0.292179
sp|Q99MD9|NASP_MOUSE	Nasp	2	-5.11887	-1.91963	0.0336469	0.188262	0.0710859	0.297572
sp|Q99MN9|PCCB_MOUSE	Pccb	15	-4.48425	-3.36008	5.31012e-05	0.000137327	0.00186858	0.00301585
sp|Q99MR8|MCCA_MOUSE	Mccc1	18	-4.34717	-3.78956	6.4617e-05	5.26132e-05	0.00213753	0.00229006
sp|Q99MU3|DSRAD_MOUSE	Adar	4	-0.858696	1.72489	0.521766	0.392611	0.611191	0.512937
sp|Q99NB9|SF3B1_MOUSE	Sf3b1	8	-1.02651	0.56039	0.22675	0.996187	0.314635	0.999476
sp|Q99P72|RTN4_MOUSE	Rtn4	2	-0.151117	0.97578	0.846759	0.0612994	0.884178	0.121558
sp|Q99PG2|OGFR_MOUSE	Ogfr	1	-1.7425	-3.33147	0.00246994	0.000970531	0.0125315	0.00729663
sp|Q99PT1|GDIR1_MOUSE	Arhgdia	3	-1.3933	-1.97368	0.0221768	0.125664	0.0538954	0.217414
sp|Q99PU8|DHX30_MOUSE	Dhx30	2	-4.66347	-6.50029	2.4332e-05	0.00802187	0.00105908	0.0269484
sp|Q99PV0|PRP8_MOUSE	Prpf8	5	-0.0616264	0.248943	0.947326	0.870082	0.957749	0.923009
sp|Q9CPP0|NPM3_MOUSE	Npm3	1	-0.39083	1.61373	0.872259	0.0444442	0.899449	0.0967246
sp|Q9CQ65|MTAP_MOUSE	Mtap	1	-1.75696	-2.10045	0.0401452	0.00742402	0.0815727	0.025689
sp|Q9CQC6|BZW1_MOUSE	Bzw1	2	-1.77032	1.09114	0.129628	0.71344	0.201273	0.798396
sp|Q9CQE8|CN166_MOUSE	NA	5	-0.170534	-0.546859	0.621216	0.206975	0.699926	0.32005
sp|Q9CQF3|CPSF5_MOUSE	Nudt21	3	0.75265	0.980146	0.835723	0.92615	0.874213	0.953831
sp|Q9CQL7|MOFA1_MOUSE	Mrfap1	1	1.16026	-0.91224	0.239421	0.210015	0.326735	0.32343
sp|Q9CQP0|RM33_MOUSE	Mrpl33	1	-3.90302	-5.26259	3.48284e-05	9.33984e-05	0.00144015	0.00249163
sp|Q9CQQ4|GEMI2_MOUSE	Gemin2	1	1.46913	-0.598682	0.0736085	0.96092	0.128438	0.971394
sp|Q9CQQ7|AT5F1_MOUSE	Atp5f1	1	3.09653	5.99731	0.0103679	0.00040823	0.0318745	0.00519395
sp|Q9CQT2|RBM7_MOUSE	Rbm7	1	3.30307	2.46409	0.00200991	0.00968369	0.0110123	0.0308016
sp|Q9CQV8|1433B_MOUSE	Ywhab	4	-1.16572	-0.747454	0.0223672	0.297719	0.053929	0.415902
sp|Q9CR57|RL14_MOUSE	Rpl14	3	-1.07812	-1.48956	0.0512241	0.0100996	0.0967808	0.0315182
sp|Q9CS42|PRPS2_MOUSE	Prps2	2	2.05095	1.27111	0.0133941	0.0778326	0.0371708	0.147971
sp|Q9CU62|SMC1A_MOUSE	Smc1a	14	0.700763	1.0111	0.0498233	0.0500255	0.0949398	0.105003
sp|Q9CVB6|ARPC2_MOUSE	Arpc2	2	-2.01694	-2.91384	0.189945	0.0579302	0.273191	0.116001
sp|Q9CW03|SMC3_MOUSE	Smc3	11	0.358642	0.00684397	0.742625	0.873901	0.793477	0.923009
sp|Q9CWF2|TBB2B_MOUSE	Tubb2b	5	-2.62948	-2.09358	0.000428751	0.0134582	0.0045816	0.0398924
sp|Q9CWS0|DDAH1_MOUSE	Ddah1	1	-1.86213	0.213514	0.0105355	0.634706	0.0320621	0.730044
sp|Q9CWX9|DDX47_MOUSE	Ddx47	2	-1.29725	3.11734	0.474636	0.164845	0.566413	0.268359
sp|Q9CWZ3|RBM8A_MOUSE	Rbm8a	1	-5.43926	-4.22879	0.000351389	0.000619454	0.00409293	0.00582146
sp|Q9CXU9|EIF1B_MOUSE	Eif1b	2	0.234582	-0.245961	0.949245	0.485149	0.958517	0.597051
sp|Q9CXW3|CYBP_MOUSE	Cacybp	3	-5.89408	-5.82053	0.000277627	0.000542051	0.00379845	0.00561447
sp|Q9CXW4|RL11_MOUSE	Rpl11	9	0.190381	0.677347	0.904489	0.122627	0.925231	0.2135
sp|Q9CY21|WBS22_MOUSE	Wbscr22	1	-5.78175	-3.85089	0.657796	0.486675	0.724777	0.598039
sp|Q9CY27|TECR_MOUSE	Tecr	2	-0.505873	0.397815	0.243991	0.36974	0.330246	0.488459
sp|Q9CY57|CHTOP_MOUSE	Chtop	1	-0.215009	-2.56091	0.333533	0.0016295	0.425667	0.0098365
sp|Q9CY58|PAIRB_MOUSE	Serbp1	6	-2.55146	-1.40482	0.00732608	0.0390564	0.0255297	0.0875328
sp|Q9CYI4|LUC7L_MOUSE	Luc7l	2	-3.55825	-3.66369	0.309083	0.204868	0.400018	0.319069
sp|Q9CZ13|QCR1_MOUSE	Uqcrc1	3	-0.375141	1.09056	0.177331	0.182303	0.259104	0.292179
sp|Q9CZ30|OLA1_MOUSE	Ola1	1	-0.681661	4.67187	0.658172	0.000189908	0.724777	0.00348925
sp|Q9CZ44|NSF1C_MOUSE	Nsfl1c	1	1.10114	-9.01301	0.912525	0.346632	0.929382	0.466881
sp|Q9CZU6|CISY_MOUSE	Cs	3	-1.52585	0.0300767	0.0480174	0.732917	0.0932169	0.810324
sp|Q9CZX8|RS19_MOUSE	Rps19	8	-0.732952	-0.792595	0.177187	0.136349	0.259104	0.230665
sp|Q9D024|CCD47_MOUSE	Ccdc47	1	-2.21612	1.23399	0.00185692	0.0151424	0.0105908	0.0427472
sp|Q9D0B0|SRSF9_MOUSE	Srsf9	6	-0.116795	1.01359	0.692453	0.193131	0.754423	0.303299
sp|Q9D0D3|PAPD1_MOUSE	Mtpap	4	-0.803548	-0.231953	0.0513745	0.804912	0.0967808	0.866747
sp|Q9D0D5|T2EA_MOUSE	Gtf2e1	1	2.22362	-0.545518	0.0165568	0.674825	0.0430763	0.766593
sp|Q9D0E1|HNRPM_MOUSE	Hnrnpm	21	-1.01507	0.545015	0.026433	0.3554	0.0602591	0.473458
sp|Q9D0F9|PGM1_MOUSE	Pgm1	4	-6.9797	-4.9305	0.000284769	0.00194926	0.00379845	0.0109662
sp|Q9D0I9|SYRC_MOUSE	Rars	3	2.75191	0.417603	0.000137175	0.575446	0.00282502	0.674071
sp|Q9D0J8|PTMS_MOUSE	Ptms	1	0.205911	-0.570047	0.614008	0.717803	0.694644	0.800031
sp|Q9D0T1|NH2L1_MOUSE	Snu13	2	5.51213	6.06794	0.00449746	0.00235097	0.0177962	0.0120761
sp|Q9D1D4|TMEDA_MOUSE	Tmed10	1	2.63574	5.16373	0.000555103	3.08759e-05	0.00504472	0.00206196
sp|Q9D1G1|RAB1B_MOUSE	Rab1b	1	1.56411	3.65229	0.0172855	0.000748302	0.0443948	0.00633368
sp|Q9D1R9|RL34_MOUSE	Rpl34	2	-0.0790684	-0.67364	0.671863	0.136391	0.736911	0.230665
sp|Q9D287|SPF27_MOUSE	Bcas2	1	1.52167	-1.58534	0.0634751	0.941058	0.114366	0.959623
sp|Q9D2E2|TOE1_MOUSE	Toe1	4	0.76893	0.460943	0.23426	0.499792	0.322351	0.607835
sp|Q9D3D9|ATPD_MOUSE	Atp5d	2	-3.97659	-1.70941	0.000306174	0.00493468	0.00389548	0.0196195
sp|Q9D6F9|TBB4A_MOUSE	Tubb4a	2	-2.6853	-2.6649	0.0108045	0.015145	0.0322546	0.0427472
sp|Q9D7H3|RTCA_MOUSE	RtcA	7	-1.1844	-0.606426	0.162165	0.689779	0.240995	0.778236
sp|Q9D7S7|RL22L_MOUSE	Rpl22l1	2	3.68308	5.44352	0.000773973	0.00213791	0.00626533	0.0116622
sp|Q9D819|IPYR_MOUSE	Ppa1	1	-5.03754	-1.13849	0.0172643	0.323884	0.0443948	0.445677
sp|Q9D883|U2AF1_MOUSE	U2af1	11	-1.86503	-1.01888	0.00580712	0.136056	0.0215358	0.230665
sp|Q9D8E6|RL4_MOUSE	Rpl4	16	-0.707292	0.229103	0.280977	0.26169	0.372385	0.381017
sp|Q9D8M4|RL7L_MOUSE	Rpl7l1	3	3.69163	2.50231	0.0285119	0.161889	0.0640743	0.264068
sp|Q9D8N0|EF1G_MOUSE	Eef1g	7	-0.517909	-1.90472	0.254919	0.0450833	0.344474	0.0972139
sp|Q9D8T7|SLIRP_MOUSE	Slirp	4	-5.08385	-3.8776	0.000377121	0.000711751	0.00433166	0.00627115
sp|Q9D902|T2EB_MOUSE	Gtf2e2	3	0.108379	1.03322	0.655777	0.384261	0.724069	0.504419
sp|Q9D964|GATM_MOUSE	Gatm	6	-2.3553	-2.32629	0.00379396	0.0421897	0.0159983	0.0929067
sp|Q9DAM7|TM263_MOUSE	Tmem263	2	-3.22419	-2.33458	0.000155476	0.000890488	0.00296531	0.00701365
sp|Q9DB20|ATPO_MOUSE	Atp5o	3	-1.6455	-4.29499	0.149239	0.00191666	0.22481	0.0109316
sp|Q9DBE9|SPB1_MOUSE	Ftsj3	2	3.59633	2.74323	0.00234548	0.0177858	0.0122767	0.0483659
sp|Q9DBG3|AP2B1_MOUSE	Ap2b1	1	1.82797	-1.59233	0.335584	0.0392207	0.426913	0.0876637
sp|Q9DBJ1|PGAM1_MOUSE	Pgam1	2	-1.00783	-1.69459	0.593549	0.574334	0.676123	0.673723
sp|Q9DBR1|XRN2_MOUSE	Xrn2	3	-3.66484	-4.00101	0.000314537	0.000111997	0.00394125	0.0026447
sp|Q9DC28|KC1D_MOUSE	Csnk1d	2	2.25585	1.37677	0.00054454	0.009119	0.00500402	0.029516
sp|Q9DC51|GNAI3_MOUSE	Gnai3	1	0	5.12116	0.957222	0.409504	0.963045	0.525869
sp|Q9DCE5|PK1IP_MOUSE	Pak1ip1	10	0.691046	1.66396	0.568439	0.0737201	0.657482	0.141387
sp|Q9DCF9|SSRG_MOUSE	Ssr3	1	0.0453813	1.30493	0.510325	0.0819845	0.60308	0.155152
sp|Q9DCH4|EIF3F_MOUSE	Eif3f	1	-0.732656	-5.58238	0.200248	0.00431099	0.286353	0.017617
sp|Q9DCL9|PUR6_MOUSE	Paics	3	-0.786151	1.64566	0.186255	0.104569	0.268819	0.187997
sp|Q9DCT8|CRIP2_MOUSE	Crip2	2	-1.52467	-0.555138	0.0245746	0.591051	0.0582327	0.685553
sp|Q9DCX2|ATP5H_MOUSE	Atp5h	3	0.662642	2.13184	0.598018	0.0274342	0.67841	0.0669343
sp|Q9EPL8|IPO7_MOUSE	Ipo7	1	-8.48018	-4.90477	0.156465	0.267528	0.23399	0.386118
sp|Q9EPU0|RENT1_MOUSE	Upf1	2	-2.25033	-2.0147	0.00259721	0.00624584	0.0130176	0.0227547
sp|Q9EQI8|RM46_MOUSE	Mrpl46	1	-3.25854	2.08496	0.00709952	0.289184	0.0250911	0.407531
sp|Q9EQU5|SET_MOUSE	Set	3	-4.22363	-1.813	0.000780326	0.017262	0.00626533	0.0474275
sp|Q9ERK4|XPO2_MOUSE	Cse1l	4	-2.59537	-1.71523	0.00926146	0.0509162	0.0296424	0.105798
sp|Q9EST3|4ET_MOUSE	Eif4enif1	1	-12.7548	-12.7548	0.0521872	0.14591	0.0978658	0.241818
sp|Q9ESX4|NO40_MOUSE	Zcchc17	1	-0.0673899	-1.72975	0.961347	0.104493	0.966019	0.187997
sp|Q9ESX5|DKC1_MOUSE	Dkc1	2	2.58502	3.95503	0.00462033	0.000453911	0.017939	0.0054547
sp|Q9ESZ8|GTF2I_MOUSE	Gtf2i	2	3.24083	0.365399	0.136179	0.97996	0.20972	0.984723
sp|Q9JHU4|DYHC1_MOUSE	Dync1h1	26	-0.701902	-0.0800412	0.240129	0.915989	0.326899	0.949276
sp|Q9JI13|SAS10_MOUSE	Utp3	1	-0.827196	0.41553	0.231271	0.602439	0.3193	0.696807
sp|Q9JIF0|ANM1_MOUSE	Prmt1	4	-0.441486	0.300745	0.221096	0.861462	0.309385	0.916897
sp|Q9JIG8|PRAF2_MOUSE	Praf2	1	-0.607797	1.36432	0.645068	0.0265396	0.720487	0.0661093
sp|Q9JII5|DAZP1_MOUSE	Dazap1	10	0.753372	0.078086	0.379495	0.964377	0.474083	0.972609
sp|Q9JIK5|DDX21_MOUSE	Ddx21	22	0.245252	1.54351	0.645563	0.580353	0.720487	0.677898
sp|Q9JJG9|NOA1_MOUSE	Noa1	2	1.31598	2.10389	0.0394845	0.00412319	0.0806263	0.0173367
sp|Q9JJI8|RL38_MOUSE	Rpl38	5	-2.71769	-3.51768	0.000253395	0.000163804	0.00379845	0.00338664
sp|Q9JKB3|YBOX3_MOUSE	Ybx3	3	-1.51286	0.126042	0.0177987	0.523744	0.0452909	0.629217
sp|Q9JKN6|NOVA1_MOUSE	Nova1	3	-3.1567	-4.77616	0.0165638	0.00018495	0.0430763	0.00348925
sp|Q9JLI8|SART3_MOUSE	Sart3	3	-0.284313	-0.575538	0.449528	0.302449	0.546705	0.421086
sp|Q9JLM8|DCLK1_MOUSE	Dclk1	1	-1.09124	-3.67826	0.743966	0.00175587	0.793884	0.0102261
sp|Q9JMH9|MY18A_MOUSE	Myo18a	2	0.347684	1.72206	0.389517	0.00419266	0.484407	0.0173367
sp|Q9QUI0|RHOA_MOUSE	Rhoa	2	-1.68346	-4.13509	0.0222066	0.00325118	0.0538954	0.0147732
sp|Q9QWH1|PHC2_MOUSE	Phc2	1	-1.60043	-0.548744	0.0231748	0.34391	0.0552957	0.46397
sp|Q9QX47|SON_MOUSE	Son	3	-1.64309	-1.08721	0.0910887	0.227569	0.152182	0.344687
sp|Q9QXA5|LSM4_MOUSE	Lsm4	2	-2.27657	-2.62413	0.00410662	0.00262268	0.0167133	0.013066
sp|Q9QXB9|DRG2_MOUSE	Drg2	1	11.0245	8.73657	0.00302722	0.0483663	0.0141441	0.102825
sp|Q9QXD8|LIMD1_MOUSE	Limd1	1	1.84129	-0.859715	0.703716	0.206632	0.763744	0.32005
sp|Q9QXS1|PLEC_MOUSE	Plec	3	-2.57211	-4.66582	0.0210367	0.00250905	0.0522443	0.0126631
sp|Q9QXZ0|MACF1_MOUSE	Macf1	1	11.4812	7.63586	0.00457517	0.355523	0.0178503	0.473458
sp|Q9QYB1|CLIC4_MOUSE	Clic4	1	2.28738	0.942918	0.446602	0.273387	0.544749	0.391161
sp|Q9QYF9|NDRG3_MOUSE	Ndrg3	1	0.993093	-0.410919	0.950788	0.733962	0.958905	0.810396
sp|Q9QYJ0|DNJA2_MOUSE	Dnaja2	1	-0.845307	-0.445959	0.232639	0.898282	0.320655	0.937076
sp|Q9QYR6|MAP1A_MOUSE	Map1a	2	3.69388	0.643103	0.0109724	0.798222	0.0322546	0.860664
sp|Q9QZD9|EIF3I_MOUSE	Eif3i	3	0.320122	1.55495	0.862613	0.148911	0.896208	0.245807
sp|Q9QZE5|COPG1_MOUSE	Copg1	1	-1.36442	-1.41092	0.041753	0.0668943	0.0838099	0.130168
sp|Q9QZQ8|H2AY_MOUSE	H2afy	3	-0.217956	1.38133	0.915076	0.093186	0.930834	0.171912
sp|Q9R020|ZRAB2_MOUSE	Zranb2	3	-2.00127	-0.402595	0.00366383	0.22849	0.0157812	0.344812
sp|Q9R0B7|ZN346_MOUSE	Znf346	2	4.50877	4.1923	0.000112382	8.62802e-05	0.00271157	0.00237846
sp|Q9R0P4|SMAP_MOUSE	Smap	1	0	0	0.269168	0.257431	0.359441	0.376237
sp|Q9R190|MTA2_MOUSE	Mta2	1	1.78594	1.9862	0.153716	0.0338921	0.230296	0.0776825
sp|Q9R226|KHDR3_MOUSE	Khdrbs3	7	0.954965	1.19502	0.0492021	0.0572225	0.0944087	0.115141
sp|Q9WTX5|SKP1_MOUSE	Skp1	2	-5.45002	-4.55587	0.000273217	0.000484173	0.00379845	0.00548226
sp|Q9WU78|PDC6I_MOUSE	Pdcd6ip	2	-5.52462	-3.78973	0.000877724	0.00279636	0.00648105	0.0136035
sp|Q9WUA2|SYFB_MOUSE	Farsb	9	-1.58675	-0.849651	0.0120922	0.098471	0.0343652	0.180167
sp|Q9WUK2|IF4H_MOUSE	Eif4h	3	-0.504232	1.0393	0.332581	0.69087	0.425667	0.778379
sp|Q9WUK4|RFC2_MOUSE	Rfc2	2	-1.01516	-1.1388	0.298028	0.23139	0.389367	0.347926
sp|Q9WUM4|COR1C_MOUSE	Coro1c	1	1.47426	2.30076	0.0638493	0.0173896	0.11479	0.0474626
sp|Q9WV60|GSK3B_MOUSE	Gsk3b	2	1.45552	3.66539	0.16997	0.00168438	0.250116	0.0100099
sp|Q9WVA4|TAGL2_MOUSE	Tagln2	2	-4.68877	-2.88486	0.00336737	0.0123068	0.0148921	0.0367427
sp|Q9Z0N1|IF2G_MOUSE	Eif2s3x	5	0.13618	-0.230044	0.809697	0.977418	0.854106	0.983363
sp|Q9Z103|ADNP_MOUSE	Adnp	1	-2.13757	-1.19722	0.00174384	0.0271951	0.010156	0.0669343
sp|Q9Z108|STAU1_MOUSE	Stau1	1	2.66619	3.95373	0.0135075	0.00113636	0.0373603	0.00810143
sp|Q9Z1D1|EIF3G_MOUSE	Eif3g	1	-7.45267	-6.22572	5.42273e-05	0.000195467	0.00186858	0.00348925
sp|Q9Z1Q5|CLIC1_MOUSE	Clic1	1	-3.18715	0.259597	0.00279245	0.791714	0.0133489	0.856848
sp|Q9Z1Q9|SYVC_MOUSE	Vars	4	-0.539442	0.870921	0.120622	0.102433	0.188928	0.185773
sp|Q9Z1S8|GAB2_MOUSE	Gab2	1	1.2397	3.83644	0.0310292	0.000618875	0.0678866	0.00582146
sp|Q9Z204|HNRPC_MOUSE	Hnrnpc	13	-3.30405	-4.00894	7.51592e-05	4.19643e-05	0.00236785	0.00206196
sp|Q9Z2D6|MECP2_MOUSE	Mecp2	1	0.428246	2.51278	0.218633	0.00561539	0.307499	0.0212051
sp|Q9Z2Q2|KNOP1_MOUSE	Knop1	1	1.36433	3.23109	0.0500333	0.00130105	0.0951207	0.00850904
sp|Q9Z2X1|HNRPF_MOUSE	Hnrnpf	10	-1.56178	0.826387	0.00534777	0.107145	0.0201946	0.19138

## Sheet: NFIB 3' UTR vs hybrid RNA raw
NFIB 3' UTR vs hybrid RNA
proteinName	geneName	nbPeptides	log2ratio_3p_PD	pValue_3p_PD	qValue_3p_PD
sp|Q61990|PCBP2_MOUSE	Pcbp2	10	-2.0839	3.44987e-06	0.00162029
sp|Q8VDJ3|VIGLN_MOUSE	Hdlbp	56	-1.83266	2.72033e-06	0.00162029
sp|Q91Z31|PTBP2_MOUSE	Ptbp2	18	-2.39591	3.1659e-06	0.00162029
sp|P61979|HNRPK_MOUSE	Hnrnpk	37	-1.83001	6.81795e-06	0.00240162
sp|P17225|PTBP1_MOUSE	Ptbp1	20	-1.88786	9.60991e-06	0.0025988
sp|P60335|PCBP1_MOUSE	Pcbp1	17	-1.44495	1.2911e-05	0.0025988
sp|Q8C7M3|TRIM9_MOUSE	Trim9	3	2.78636	1.12564e-05	0.0025988
sp|Q8BHD7|PTBP3_MOUSE	Ptbp3	5	-1.32234	4.57691e-05	0.00806109
sp|Q8K310|MATR3_MOUSE	Matr3	53	-1.0812	5.64171e-05	0.00883242
sp|Q99MN1|SYK_MOUSE	Kars	25	-1.32894	8.48955e-05	0.0119618
sp|P70318|TIAR_MOUSE	Tial1	5	-1.08463	0.000169407	0.0197191
sp|Q61699|HS105_MOUSE	Hsph1	3	-0.991066	0.000181936	0.0197191
sp|Q9JKN6|NOVA1_MOUSE	Nova1	3	-0.941283	0.000177694	0.0197191
sp|Q9D0I9|SYRC_MOUSE	Rars	22	-0.922588	0.000222927	0.022436
sp|Q3UEB3|PUF60_MOUSE	Puf60	9	-1.14586	0.000258322	0.0227484
sp|Q8CHP5|PYM1_MOUSE	Pym1	3	-0.847231	0.000251586	0.0227484
sp|Q69Z36|MEX3B_MOUSE	Mex3b	2	1.22353	0.000346525	0.0287208
sp|Q9EPU4|CPSF1_MOUSE	Cpsf1	3	1.45935	0.000380405	0.0297772
sp|Q8CII2|CD123_MOUSE	Cdc123	1	0.999825	0.000427253	0.0316842
sp|P31230|AIMP1_MOUSE	Aimp1	13	-1.12794	0.000499164	0.0351661
sp|Q6PB66|LPPRC_MOUSE	Lrpprc	50	-0.673618	0.000725676	0.0486894
sp|Q8BZX4|SREK1_MOUSE	Srek1	3	-1.08237	0.000809067	0.051817
sp|Q80X82|SYMPK_MOUSE	Sympk	3	-0.916675	0.00110807	0.0678812
sp|Q9D1M4|MCA3_MOUSE	Eef1e1	7	-1.10073	0.00126782	0.0744313
sp|Q9D883|U2AF1_MOUSE	U2af1	14	-0.646744	0.00133015	0.0749672
sp|Q8BU30|SYIC_MOUSE	Iars	12	-1.01841	0.00171043	0.0861616
sp|Q8CGC7|SYEP_MOUSE	Eprs	70	-0.720211	0.00175462	0.0861616
sp|Q8CIN4|PAK2_MOUSE	Pak2	5	-1.13157	0.00177338	0.0861616
sp|Q922B2|SYDC_MOUSE	Dars	25	-0.982027	0.00159165	0.0861616
sp|Q80XP8|FA76B_MOUSE	Fam76b	5	-1.10098	0.00193414	0.0898958
sp|Q9D7H3|RTCA_MOUSE	RtcA	13	0.563067	0.00197784	0.0898958
sp|Q9WV02|RBMX_MOUSE	Rbmx	11	1.11734	0.00207327	0.0912887
sp|P61804|DAD1_MOUSE	Dad1	2	1.74012	0.00220339	0.0913109
sp|Q80VI1|TRI56_MOUSE	Trim56	2	0.600323	0.0021977	0.0913109
sp|P56379|68MP_MOUSE	Mp68	2	1.03513	0.00264956	0.103701
sp|Q9CXW3|CYBP_MOUSE	Cacybp	2	-0.998292	0.00262085	0.103701
sp|P37913|DNLI1_MOUSE	Lig1	2	-0.851576	0.00274657	0.10459
sp|P70670|NACAM_MOUSE	Naca	7	0.571657	0.00294707	0.10459
sp|Q62351|TFR1_MOUSE	Tfrc	2	-1.04835	0.00291334	0.10459
sp|Q8R010|AIMP2_MOUSE	Aimp2	6	-0.898462	0.0029692	0.10459
sp|Q8BMJ2|SYLC_MOUSE	Lars	6	-0.895522	0.00306427	0.105306
sp|Q68FL6|SYMC_MOUSE	Mars	19	-0.787864	0.00332667	0.106786
sp|Q8C460|ERI3_MOUSE	Eri3	3	2.17637	0.00336691	0.106786
sp|Q922R8|PDIA6_MOUSE	Pdia6	6	0.607305	0.0033381	0.106786
sp|Q9CZX8|RS19_MOUSE	Rps19	21	0.721387	0.00341049	0.106786
sp|P26369|U2AF2_MOUSE	U2af2	14	-0.715392	0.00362702	0.108959
sp|P63323|RS12_MOUSE	Rps12	4	-0.630407	0.00363456	0.108959
sp|Q3ULD5|MCCB_MOUSE	Mccc2	21	1.36538	0.00396504	0.11354
sp|Q921G7|ETFD_MOUSE	Etfdh	4	0.767993	0.00398905	0.11354
sp|Q99ME2|WDR6_MOUSE	Wdr6	3	0.805102	0.00402911	0.11354
sp|Q9CRB2|NHP2_MOUSE	Nhp2	3	1.40894	0.0041223	0.113889
sp|Q05920|PYC_MOUSE	Pc	60	1.11856	0.00420823	0.114027
sp|Q91VE6|MK67I_MOUSE	Nifk	5	0.595594	0.00436293	0.115988
sp|Q9JIG8|PRAF2_MOUSE	Praf2	2	0.780117	0.0046434	0.121158
sp|Q91YR1|TWF1_MOUSE	Twf1	3	-0.912717	0.00485578	0.122655
sp|Q99MR8|MCCA_MOUSE	Mccc1	28	1.29263	0.00487488	0.122655
sp|Q80WW9|DDRGK_MOUSE	Ddrgk1	4	-0.854855	0.00505688	0.125002
sp|Q91VM5|RMXL1_MOUSE	Rbmxl1	56	1.2242	0.00519247	0.126141
sp|Q99JY9|ARP3_MOUSE	Actr3	3	-0.610484	0.00531808	0.127003
sp|P97868|RBBP6_MOUSE	Rbbp6	6	0.522607	0.00587357	0.137931
sp|Q99MN9|PCCB_MOUSE	Pccb	27	1.51086	0.00600784	0.138771
sp|O08583|THOC4_MOUSE	Alyref	12	0.732	0.00621814	0.13899
sp|P29341|PABP1_MOUSE	Pabpc1	30	0.812036	0.00655703	0.13899
sp|Q3TBW2|RM10_MOUSE	Mrpl10	1	0.772329	0.00663341	0.13899
sp|Q5SWU9|ACACA_MOUSE	Acaca	95	1.0371	0.00663526	0.13899
sp|Q8VCB1|NDC1_MOUSE	Ndc1	5	-0.709559	0.00664892	0.13899
sp|Q91ZA3|PCCA_MOUSE	Pcca	47	1.48297	0.00635146	0.13899
sp|Q921F4|HNRLL_MOUSE	Hnrnpll	21	-0.507953	0.0067078	0.13899
sp|Q8VHK9|DHX36_MOUSE	Dhx36	17	0.540686	0.00824346	0.168334
sp|P62267|RS23_MOUSE	Rps23	12	0.788614	0.00909388	0.168613
sp|Q60668|HNRPD_MOUSE	Hnrnpd	36	0.898728	0.00909953	0.168613
sp|Q8C3X8|LMF2_MOUSE	Lmf2	3	0.507389	0.00878994	0.168613
sp|Q8CCS6|PABP2_MOUSE	Pabpn1	16	0.755786	0.00912421	0.168613
sp|Q91YM4|TBRG4_MOUSE	Tbrg4	8	1.06844	0.00921449	0.168613
sp|Q9CX86|ROA0_MOUSE	Hnrnpa0	28	0.544306	0.00861321	0.168613
sp|Q9CXY6|ILF2_MOUSE	Ilf2	21	1.1933	0.0085579	0.168613
sp|Q9Z1X4|ILF3_MOUSE	Ilf3	47	1.03012	0.00917484	0.168613
sp|Q9Z277|BAZ1B_MOUSE	Baz1b	5	0.483321	0.00954603	0.172441
sp|Q3V3R1|C1TM_MOUSE	Mthfd1l	14	0.533809	0.00995504	0.177553
sp|P28352|APEX1_MOUSE	Apex1	13	0.51666	0.0118435	0.185416
sp|P47964|RL36_MOUSE	Rpl36	3	-0.469409	0.0117088	0.185416
sp|Q60597|ODO1_MOUSE	Ogdh	17	0.344072	0.0117927	0.185416
sp|Q6P549|SHIP2_MOUSE	Inppl1	2	-5.20213	0.0116101	0.185416
sp|Q8BWY3|ERF1_MOUSE	Etf1	1	-0.544854	0.0105506	0.185416
sp|Q8C570|RAE1L_MOUSE	Rae1	3	0.754988	0.0112604	0.185416
sp|Q8K3G9|DP13B_MOUSE	Appl2	12	-0.49115	0.0113316	0.185416
sp|Q91ZJ5|UGPA_MOUSE	Ugp2	4	-0.400677	0.0115185	0.185416
sp|Q99N91|RM34_MOUSE	Mrpl34	2	2.06891	0.0110042	0.185416
sp|Q9DB20|ATPO_MOUSE	Atp5o	16	0.484952	0.0114426	0.185416
sp|Q9WVA3|BUB3_MOUSE	Bub3	2	0.751401	0.0114147	0.185416
sp|Q9D3D9|ATPD_MOUSE	Atp5d	2	0.733608	0.0127896	0.198028
sp|Q6ZWN5|RS9_MOUSE	Rps9	26	0.667244	0.0129724	0.198675
sp|P56382|ATP5E_MOUSE	Atp5e	2	0.585276	0.0136665	0.200584
sp|Q497V5|SRBD1_MOUSE	Srbd1	21	0.771088	0.0134282	0.200584
sp|Q8C1B7|SEP11_MOUSE	Septin11	18	-0.369916	0.0136256	0.200584
sp|Q9D710|TMX2_MOUSE	Tmx2	7	0.466621	0.0132644	0.200584
sp|Q8BHL3|TB10B_MOUSE	Tbc1d10b	2	0.447793	0.0140836	0.202488
sp|Q8VE22|RT23_MOUSE	Mrps23	4	1.09735	0.0140108	0.202488
sp|P52912|TIA1_MOUSE	Tia1	3	-1.48005	0.014638	0.204207
sp|Q3UVK0|ERMP1_MOUSE	Ermp1	8	0.416722	0.0145074	0.204207
sp|Q6NZF1|ZC11A_MOUSE	Zc3h11a	11	1.06523	0.0145538	0.204207
sp|P62315|SMD1_MOUSE	Snrpd1	5	0.427167	0.0148408	0.205007
sp|Q5F2E8|TAOK1_MOUSE	Taok1	6	0.535208	0.0153296	0.207687
sp|Q60722|ITF2_MOUSE	Tcf4	2	0.701731	0.0153285	0.207687
sp|O35114|SCRB2_MOUSE	Scarb2	2	-0.488477	0.0162474	0.209449
sp|O70133|DHX9_MOUSE	Dhx9	70	0.826227	0.016026	0.209449
sp|P24788|CD11B_MOUSE	Cdk11b	5	0.759369	0.0170082	0.209449
sp|P62880|GBB2_MOUSE	Gnb2	3	-0.6339	0.0171376	0.209449
sp|P62996|TRA2B_MOUSE	Tra2b	26	0.392684	0.0190694	0.209449
sp|P63276|RS17_MOUSE	Rps17	14	0.767299	0.0168375	0.209449
sp|Q3THE2|ML12B_MOUSE	Myl12b	3	0.308579	0.0188284	0.209449
sp|Q5XKN4|JAGN1_MOUSE	Jagn1	1	4.08598	0.0173964	0.209449
sp|Q6P5H2|NEST_MOUSE	Nes	11	-0.488287	0.0185335	0.209449
sp|Q7TMK9|HNRPQ_MOUSE	Syncrip	52	0.897933	0.0185042	0.209449
sp|Q7TSC1|PRC2A_MOUSE	Prrc2a	22	0.971629	0.0169606	0.209449
sp|Q80VD1|FA98B_MOUSE	Fam98b	14	0.698453	0.0185592	0.209449
sp|Q8CFI7|RPB2_MOUSE	Polr2b	8	0.378677	0.0188596	0.209449
sp|Q8K003|TMA7_MOUSE	Tma7	2	0.872073	0.0158813	0.209449
sp|Q99020|ROAA_MOUSE	Hnrnpab	29	1.29472	0.0168736	0.209449
sp|Q99KG3|RBM10_MOUSE	Rbm10	3	-0.577428	0.019042	0.209449
sp|Q9CPQ1|COX6C_MOUSE	Cox6c	4	0.325962	0.0191402	0.209449
sp|Q9CQX8|RT36_MOUSE	Mrps36	2	0.554788	0.0191106	0.209449
sp|Q9D0B0|SRSF9_MOUSE	Srsf9	12	0.433645	0.0177539	0.209449
sp|Q9DAS9|GBG12_MOUSE	Gng12	3	-0.747634	0.0171695	0.209449
sp|Q9DBY8|NVL_MOUSE	Nvl	2	-0.536472	0.0159906	0.209449
sp|Q9DC69|NDUA9_MOUSE	Ndufa9	12	0.368887	0.0180636	0.209449
sp|Q9R0B7|ZN346_MOUSE	Znf346	2	1.39685	0.0182755	0.209449
sp|Q9WTM5|RUVB2_MOUSE	Ruvbl2	9	-0.339245	0.019176	0.209449
sp|Q9Z130|HNRDL_MOUSE	Hnrnpdl	23	0.913031	0.0166234	0.209449
sp|Q8K1R3|PNPT1_MOUSE	Pnpt1	2	0.85161	0.019776	0.214341
sp|Q8C1E7|T120A_MOUSE	Tmem120a	3	0.576935	0.0214838	0.231074
sp|O55222|ILK_MOUSE	Ilk	10	-0.315259	0.0222021	0.23699
sp|Q99N93|RM16_MOUSE	Mrpl16	6	0.752137	0.0225461	0.238853
sp|Q9CZD5|IF3M_MOUSE	Mtif3	7	-0.498764	0.0227737	0.239464
sp|Q8R1F0|L10K_MOUSE	D8Ertd738e	5	1.44264	0.0232219	0.242368
sp|Q9R226|KHDR3_MOUSE	Khdrbs3	12	0.934054	0.0245554	0.254401
sp|P17665|COX7C_MOUSE	Cox7c	3	0.507825	0.0248057	0.255118
sp|Q3TJZ6|FA98A_MOUSE	Fam98a	7	0.518707	0.0250102	0.255358
sp|Q9D1J3|SARNP_MOUSE	Sarnp	5	0.496057	0.0253196	0.256657
sp|P26443|DHE3_MOUSE	Glud1	29	0.417268	0.0260993	0.262671
Biognosys|iRT	NA	10	2.18954	0.0271977	0.264287
sp|P11214|TPA_MOUSE	Plat	16	-0.54661	0.0271104	0.264287
sp|Q91W39|NCOA5_MOUSE	Ncoa5	16	0.963584	0.0270482	0.264287
sp|Q99P91|GPNMB_MOUSE	Gpnmb	2	0.68305	0.0264931	0.264287
sp|Q9CPN8|IF2B3_MOUSE	Igf2bp3	4	0.833652	0.0269198	0.264287
sp|O88532|ZFR_MOUSE	Zfr	31	0.889962	0.0283128	0.269491
sp|P97461|RS5_MOUSE	Rps5	16	0.44294	0.0282907	0.269491
sp|Q9D2G2|ODO2_MOUSE	Dlst	9	0.36344	0.0283407	0.269491
sp|Q9D7S7|RL22L_MOUSE	Rpl22l1	5	0.41701	0.0284984	0.269491
sp|P39876|TIMP3_MOUSE	Timp3	2	0.30477	0.0292202	0.272641
sp|Q62241|RU1C_MOUSE	Snrpc	6	-0.404154	0.0296054	0.272641
sp|Q8VH51|RBM39_MOUSE	Rbm39	12	-0.303637	0.0293125	0.272641
sp|Q921N6|DDX27_MOUSE	Ddx27	4	1.73481	0.0294604	0.272641
sp|Q64213|SF01_MOUSE	Sf1	17	0.359008	0.0300357	0.274445
sp|Q9Z321|TOP3B_MOUSE	Top3b	14	0.436736	0.0301909	0.274445
sp|P46460|NSF_MOUSE	Nsf	3	-0.642064	0.0307638	0.274858
sp|Q8BMS1|ECHA_MOUSE	Hadha	54	0.327801	0.0305168	0.274858
sp|Q8BZ20|PAR12_MOUSE	Parp12	3	1.51248	0.0308215	0.274858
sp|Q61166|MARE1_MOUSE	Mapre1	2	-0.585578	0.0316083	0.279368
sp|Q9DB77|QCR2_MOUSE	Uqcrc2	21	0.391893	0.0317859	0.279368
sp|Q9JKB3|YBOX3_MOUSE	Ybx3	7	0.627382	0.0319221	0.279368
sp|P35278|RAB5C_MOUSE	Rab5c	7	-0.46054	0.0330217	0.282134
sp|P45952|ACADM_MOUSE	Acadm	2	0.743372	0.0332393	0.282134
sp|P61205|ARF3_MOUSE	Arf3	3	-0.750264	0.0325622	0.282134
sp|P62274|RS29_MOUSE	Rps29	5	0.386434	0.0330844	0.282134
sp|P62960|YBOX1_MOUSE	Ybx1	22	0.608922	0.0331882	0.282134
sp|P62313|LSM6_MOUSE	Lsm6	2	0.741876	0.0335178	0.282794
sp|Q9CPQ8|ATP5L_MOUSE	Atp5l	4	0.38487	0.0337893	0.283388
sp|D3YXK2|SAFB1_MOUSE	Safb	43	0.714827	0.0345405	0.287974
sp|P62862|RS30_MOUSE	Fau	6	0.535967	0.0355938	0.288626
sp|P97376|FRG1_MOUSE	Frg1	3	0.532798	0.0355826	0.288626
sp|Q3TLH4|PRC2C_MOUSE	Prrc2c	29	0.848752	0.0350051	0.288626
sp|Q61879|MYH10_MOUSE	Myh10	27	-0.281197	0.035643	0.288626
sp|Q8K209|AGRG1_MOUSE	Adgrg1	2	0.734228	0.0352548	0.288626
sp|Q3TFD2|PCAT1_MOUSE	Lpcat1	7	0.461874	0.0359708	0.288774
sp|Q60737|CSK21_MOUSE	Csnk2a1	11	-0.372153	0.0360711	0.288774
sp|P56480|ATPB_MOUSE	Atp5b	29	0.338575	0.036763	0.29265
sp|Q8CIB5|FERM2_MOUSE	Fermt2	15	-0.342403	0.0374316	0.296082
sp|Q8K019|BCLF1_MOUSE	Bclaf1	58	0.792405	0.0376144	0.296082
sp|Q6ZWY9|H2B1C_MOUSE	Hist1h2bc	12	0.375026	0.0387396	0.298274
sp|Q80YR5|SAFB2_MOUSE	Safb2	15	0.41972	0.0387008	0.298274
sp|Q9CQE8|CN166_MOUSE	NA	9	0.405747	0.0383061	0.298274
sp|Q9CQF3|CPSF5_MOUSE	Nudt21	9	0.858031	0.0383887	0.298274
sp|Q64133|AOFA_MOUSE	Maoa	14	0.288295	0.0394972	0.302454
sp|A2AAY5|SPD2B_MOUSE	Sh3pxd2b	9	0.698336	0.0403157	0.304858
sp|E9Q784|ZC3HD_MOUSE	Zc3h13	10	0.46563	0.0404603	0.304858
sp|Q6PDI5|ECM29_MOUSE	Ecm29	1	0.46232	0.0402266	0.304858
sp|P62270|RS18_MOUSE	Rps18	22	0.754056	0.0410051	0.305274
sp|P62843|RS15_MOUSE	Rps15	9	0.311846	0.0410087	0.305274
sp|Q62383|SPT6H_MOUSE	Supt6h	1	7.91774	0.0411653	0.305274
sp|P49312|ROA1_MOUSE	Hnrnpa1	41	0.502367	0.0416823	0.305996
sp|Q61164|CTCF_MOUSE	Ctcf	15	0.45195	0.0416971	0.305996
sp|Q03141|MARK3_MOUSE	Mark3	22	0.406973	0.0421068	0.307402
sp|P10126|EF1A1_MOUSE	Eef1a1	37	0.2739	0.043812	0.314955
sp|P16045|LEG1_MOUSE	Lgals1	4	-0.910857	0.0437214	0.314955
sp|P62915|TF2B_MOUSE	Gtf2b	3	0.864035	0.0435162	0.314955
sp|P62702|RS4X_MOUSE	Rps4x	36	0.457771	0.0456184	0.319838
sp|Q61749|EI2BD_MOUSE	Eif2b4	3	-0.316493	0.0461258	0.319838
sp|Q7TNC4|LC7L2_MOUSE	Luc7l2	20	0.625759	0.0455034	0.319838
sp|Q80VL1|TDRKH_MOUSE	Tdrkh	4	-0.376816	0.0462087	0.319838
sp|Q8R310|TMCC3_MOUSE	Tmcc3	6	-0.455704	0.0472793	0.319838
sp|Q8R3N6|THOC1_MOUSE	Thoc1	3	0.975955	0.0472863	0.319838
sp|Q921E2|RAB31_MOUSE	Rab31	6	-0.566715	0.0466394	0.319838
sp|Q923D5|WBP11_MOUSE	Wbp11	5	0.421597	0.0462748	0.319838
sp|Q99J62|RFC4_MOUSE	Rfc4	5	0.380071	0.0476084	0.319838
sp|Q9CQ48|NUDC2_MOUSE	Nudcd2	3	0.649454	0.0456443	0.319838
sp|Q9CQL1|MGN2_MOUSE	Magohb	5	0.318842	0.0468216	0.319838
sp|Q9CQS2|NOP10_MOUSE	Nop10	3	-0.242962	0.0466899	0.319838
sp|Q9D1I6|RM14_MOUSE	Mrpl14	4	0.351029	0.0452629	0.319838
sp|Q9D5T0|ATAD1_MOUSE	Atad1	8	-0.311761	0.0476692	0.319838
sp|P00405|COX2_MOUSE	Mtco2	3	0.333493	0.0483088	0.320485
sp|P16330|CN37_MOUSE	Cnp	5	0.337043	0.048448	0.320485
sp|Q9CY57|CHTOP_MOUSE	Chtop	9	0.41732	0.0480664	0.320485
sp|P08113|ENPL_MOUSE	Hsp90b1	25	-0.302917	0.0493273	0.323266
sp|Q8BKI2|TNR6B_MOUSE	Tnrc6b	1	0.382362	0.0491717	0.323266
sp|Q06185|ATP5I_MOUSE	Atp5i	5	0.353448	0.0496916	0.324146
sp|P27661|H2AX_MOUSE	H2afx	5	0.781932	0.0511311	0.330722
sp|Q9CYI4|LUC7L_MOUSE	Luc7l	9	0.457811	0.0511693	0.330722
sp|P48771|CX7A2_MOUSE	Cox7a2	2	0.301684	0.0519211	0.332531
sp|Q9QXA5|LSM4_MOUSE	Lsm4	5	-0.290975	0.0517352	0.332531
sp|P57776|EF1D_MOUSE	Eef1d	10	0.301581	0.052221	0.332939
sp|Q9QZE5|COPG1_MOUSE	Copg1	5	-0.465728	0.0525991	0.333838
sp|Q8BXZ1|TMX3_MOUSE	Tmx3	1	8.51351	0.0530144	0.334065
sp|Q8CGZ0|CHERP_MOUSE	Cherp	4	0.542009	0.053109	0.334065
sp|P24547|IMDH2_MOUSE	Impdh2	7	0.506752	0.054085	0.338692
sp|P99028|QCR6_MOUSE	Uqcrh	2	0.356146	0.0545095	0.33984
sp|Q9QYS9|QKI_MOUSE	Qki	25	-0.462979	0.0551738	0.342466
sp|Q80WQ2|VAC14_MOUSE	Vac14	1	-1.38252	0.0556419	0.343857
sp|P51881|ADT2_MOUSE	Slc25a5	32	0.269249	0.0559102	0.343884
sp|Q8VEK3|HNRPU_MOUSE	Hnrnpu	65	0.343784	0.0561344	0.343884
sp|O55126|NIPS2_MOUSE	Gbas	6	0.478636	0.0570882	0.3469
sp|P47740|AL3A2_MOUSE	Aldh3a2	2	-0.338687	0.0573654	0.3469
sp|P62259|1433E_MOUSE	Ywhae	5	-0.268869	0.0572385	0.3469
sp|Q91V92|ACLY_MOUSE	Acly	14	0.515163	0.0579162	0.348735
sp|O35492|CLK3_MOUSE	Clk3	1	0.926638	0.0591228	0.349073
sp|O54879|HMGB3_MOUSE	Hmgb3	6	0.360058	0.0595512	0.349073
sp|O55022|PGRC1_MOUSE	Pgrmc1	6	0.285582	0.0587139	0.349073
sp|O55029|COPB2_MOUSE	Copb2	3	-0.494447	0.0602021	0.349073
sp|O70251|EF1B_MOUSE	Eef1b	5	0.913208	0.0585038	0.349073
sp|P30416|FKBP4_MOUSE	Fkbp4	2	0.306577	0.0594281	0.349073
sp|P39054|DYN2_MOUSE	Dnm2	14	-0.409785	0.0599615	0.349073
sp|Q8C025|CHPT1_MOUSE	Chpt1	1	0.409728	0.0597652	0.349073
sp|Q8CH25|SLTM_MOUSE	Sltm	25	0.801746	0.0598615	0.349073
sp|Q8VDD5|MYH9_MOUSE	Myh9	105	-0.351298	0.0607684	0.350913
sp|Q8BG05|ROA3_MOUSE	Hnrnpa3	42	0.574362	0.0613217	0.352007
sp|Q8BGT5|ALAT2_MOUSE	Gpt2	4	0.336307	0.0616619	0.352007
sp|Q9Z110|P5CS_MOUSE	Aldh18a1	6	0.503602	0.0617074	0.352007
sp|P60122|RUVB1_MOUSE	Ruvbl1	6	-0.217861	0.0636204	0.354313
sp|P97742|CPT1A_MOUSE	Cpt1a	6	-0.473855	0.0634873	0.354313
sp|Q07235|GDN_MOUSE	Serpine2	16	0.414747	0.063141	0.354313
sp|Q8BNI4|DERL2_MOUSE	Derl2	1	-1.37311	0.0632826	0.354313
sp|Q9EQM6|DGCR8_MOUSE	Dgcr8	4	0.545431	0.0627186	0.354313
sp|Q9JIF0|ANM1_MOUSE	Prmt1	5	0.215298	0.0626621	0.354313
sp|P09405|NUCL_MOUSE	Ncl	50	-0.194171	0.0641371	0.354389
sp|Q91VU0|FAM3C_MOUSE	Fam3c	2	-0.548604	0.063906	0.354389
sp|Q60749|KHDR1_MOUSE	Khdrbs1	20	0.8705	0.0645294	0.355164
sp|Q9D6S7|RRFM_MOUSE	Mrrf	1	2.1852	0.0650364	0.356561
sp|Q78IK2|USMG5_MOUSE	Usmg5	3	0.485509	0.0655321	0.356597
sp|Q91WC0|SETD3_MOUSE	Setd3	2	-0.87219	0.065549	0.356597
sp|O35083|PLCA_MOUSE	Agpat1	1	-0.929657	0.0658488	0.356807
sp|P60824|CIRBP_MOUSE	Cirbp	9	0.376957	0.0660941	0.356807
sp|P47857|PFKAM_MOUSE	Pfkm	12	0.341695	0.0667348	0.357526
sp|Q9JMH9|MY18A_MOUSE	Myo18a	9	-0.456735	0.0666667	0.357526
sp|O08788|DCTN1_MOUSE	Dctn1	9	-0.230478	0.0687829	0.359818
sp|P30999|CTND1_MOUSE	Ctnnd1	11	0.381284	0.068938	0.359818
sp|P50580|PA2G4_MOUSE	Pa2g4	19	0.295088	0.0689451	0.359818
sp|Q62261|SPTB2_MOUSE	Sptbn1	18	-0.305803	0.0690009	0.359818
sp|Q6PAQ4|REXO4_MOUSE	Rexo4	4	0.297179	0.0692056	0.359818
sp|Q8K1N4|SPAS2_MOUSE	Spats2	8	0.409221	0.0691113	0.359818
sp|Q9DCX2|ATP5H_MOUSE	Atp5h	10	0.418942	0.0681837	0.359818
sp|Q9JIK5|DDX21_MOUSE	Ddx21	52	0.298708	0.0681144	0.359818
sp|P62806|H4_MOUSE	Hist1h4a	14	0.246533	0.0710504	0.361235
sp|Q62093|SRSF2_MOUSE	Srsf2	10	0.227432	0.0708707	0.361235
sp|Q8CD10|MICU2_MOUSE	Micu2	1	0.399671	0.0705836	0.361235
sp|Q8R0G9|NU133_MOUSE	Nup133	3	-0.332405	0.0709798	0.361235
sp|Q91VR5|DDX1_MOUSE	Ddx1	37	0.276826	0.070004	0.361235
sp|Q9D937|CK098_MOUSE	NA	8	0.466036	0.0712729	0.361235
sp|Q9WVJ2|PSD13_MOUSE	Psmd13	9	-0.702725	0.0704316	0.361235
sp|Q61768|KINH_MOUSE	Kif5b	10	-0.264821	0.0716644	0.361592
sp|Q9D6J6|NDUV2_MOUSE	Ndufv2	3	0.290838	0.0718565	0.361592
sp|O54836|ZMAT3_MOUSE	Zmat3	5	0.739484	0.0754222	0.363938
sp|O70503|DHB12_MOUSE	Hsd17b12	21	0.188746	0.0753932	0.363938
sp|P61164|ACTZ_MOUSE	Actr1a	3	-0.191002	0.0744125	0.363938
sp|P97393|RHG05_MOUSE	Arhgap5	2	-0.860439	0.0730494	0.363938
sp|Q03265|ATPA_MOUSE	Atp5a1	46	0.241935	0.0749984	0.363938
sp|Q8BJ71|NUP93_MOUSE	Nup93	4	0.392994	0.0750935	0.363938
sp|Q8BMJ3|IF1AX_MOUSE	Eif1ax	4	0.236836	0.0740875	0.363938
sp|Q8R0T2|ZN768_MOUSE	Znf768	2	-4.7306	0.0751824	0.363938
sp|Q99ME9|NOG1_MOUSE	Gtpbp4	12	0.520283	0.0743631	0.363938
sp|Q9D379|HYEP_MOUSE	Ephx1	10	-0.324017	0.0754013	0.363938
sp|Q9D8X2|CC124_MOUSE	Ccdc124	3	0.277498	0.0743248	0.363938
sp|Q9R0P6|SC11A_MOUSE	Sec11a	3	0.378674	0.0731258	0.363938
sp|Q6NVF9|CPSF6_MOUSE	Cpsf6	5	0.466226	0.075833	0.364671
sp|Q8R081|HNRPL_MOUSE	Hnrnpl	49	0.277705	0.0768127	0.365639
sp|Q9JII5|DAZP1_MOUSE	Dazap1	11	-0.377182	0.0766583	0.365639
sp|Q9R0U0|SRS10_MOUSE	Srsf10	18	0.212506	0.0764128	0.365639
sp|P28740|KIF2A_MOUSE	Kif2a	15	-0.284723	0.0770922	0.365734
sp|O35129|PHB2_MOUSE	Phb2	18	0.251295	0.0775915	0.366867
sp|Q5SUQ9|CTC1_MOUSE	Ctc1	3	-0.737012	0.0787982	0.371326
sp|P97473|TRBP2_MOUSE	Tarbp2	4	1.00762	0.079353	0.372452
sp|Q8R3Y5|CS047_MOUSE	NA	2	0.513676	0.0795657	0.372452
sp|Q8BG81|PDIP3_MOUSE	Poldip3	22	0.92593	0.0799408	0.372969
sp|P68254|1433T_MOUSE	Ywhaq	4	-1.23265	0.0804565	0.374136
sp|Q91Z49|UIF_MOUSE	Fyttd1	14	0.373184	0.0815658	0.378047
sp|P60060|SC61G_MOUSE	Sec61g	3	0.488033	0.0824293	0.380796
sp|P14131|RS16_MOUSE	Rps16	17	0.728632	0.0827329	0.38095
sp|P63325|RS10_MOUSE	Rps10	25	0.455774	0.0848192	0.385807
sp|P67984|RL22_MOUSE	Rpl22	10	0.303038	0.0844661	0.385807
sp|Q78PY7|SND1_MOUSE	Snd1	42	0.209423	0.0848942	0.385807
sp|Q8K2F8|LS14A_MOUSE	Lsm14a	9	0.37826	0.084625	0.385807
sp|Q9JIX8|ACINU_MOUSE	Acin1	15	0.215262	0.0851568	0.385807
sp|O08579|EMD_MOUSE	Emd	5	-0.222535	0.0865426	0.388383
sp|Q9CR26|VTA1_MOUSE	Vta1	1	-0.626166	0.0865524	0.388383
sp|Q9DAW6|PRP4_MOUSE	Prpf4	7	0.392331	0.086039	0.388383
sp|Q9D6Z1|NOP56_MOUSE	Nop56	20	0.251753	0.0874108	0.39099
sp|Q8BK67|RCC2_MOUSE	Rcc2	9	0.248691	0.0877158	0.391112
sp|Q8VD75|HIP1_MOUSE	Hip1	14	-0.163403	0.0879934	0.391112
sp|Q924T2|RT02_MOUSE	Mrps2	2	0.277234	0.0886096	0.39167
sp|Q9CQI6|COTL1_MOUSE	Cotl1	3	-3.17642	0.0886749	0.39167
sp|Q80SZ7|GBG5_MOUSE	Gng5	1	-2.86633	0.0895011	0.394085
sp|P19536|COX5B_MOUSE	Cox5b	6	0.399933	0.0902614	0.394964
sp|Q9QYB5|ADDG_MOUSE	Add3	10	-0.267698	0.0901423	0.394964
sp|P70372|ELAV1_MOUSE	Elavl1	19	-0.315073	0.0907433	0.395097
sp|Q3TWW8|SRSF6_MOUSE	Srsf6	16	0.313441	0.0908528	0.395097
sp|Q62425|NDUA4_MOUSE	Ndufa4	7	0.361874	0.0917082	0.39759
sp|E9Q5K9|YTDC1_MOUSE	Ythdc1	10	0.305403	0.0923387	0.397875
sp|Q8JZQ2|AFG32_MOUSE	Afg3l2	4	1.00098	0.0921627	0.397875
sp|Q8VDS8|STX18_MOUSE	Stx18	1	1.15612	0.0937307	0.402642
sp|Q569Z6|TR150_MOUSE	Thrap3	60	0.759875	0.0944542	0.404517
sp|Q64012|RALY_MOUSE	Raly	16	-0.205029	0.0957349	0.408759
sp|P35550|FBRL_MOUSE	Fbl	18	0.222496	0.0971302	0.412337
sp|P83882|RL36A_MOUSE	Rpl36a	14	0.551452	0.0974508	0.412337
sp|P84099|RL19_MOUSE	Rpl19	16	0.535223	0.097211	0.412337
sp|P35922|FMR1_MOUSE	Fmr1	28	0.655787	0.0979442	0.413184
sp|O70194|EIF3D_MOUSE	Eif3d	15	-0.351442	0.0983648	0.413719
sp|O09005|DEGS1_MOUSE	Degs1	3	-0.382902	0.0990269	0.413846
sp|Q9CPS7|PNO1_MOUSE	Pno1	4	-0.273117	0.0989271	0.413846
sp|Q9DBH5|LMAN2_MOUSE	Lman2	8	-0.365289	0.0992762	0.413846
sp|O35326|SRSF5_MOUSE	Srsf5	14	0.255976	0.100539	0.414828
sp|P26043|RADI_MOUSE	Rdx	18	0.235734	0.101709	0.414828
sp|Q03963|E2AK2_MOUSE	Eif2ak2	12	0.845696	0.101513	0.414828
sp|Q3UJB9|EDC4_MOUSE	Edc4	3	0.691864	0.100196	0.414828
sp|Q8JZK9|HMCS1_MOUSE	Hmgcs1	11	-0.175056	0.101867	0.414828
sp|Q921L3|TMCO1_MOUSE	Tmco1	4	0.582003	0.101722	0.414828
sp|Q99JY0|ECHB_MOUSE	Hadhb	33	0.207081	0.101547	0.414828
sp|Q9CPT5|NOP16_MOUSE	Nop16	5	0.935073	0.100737	0.414828
sp|P19783|COX41_MOUSE	Cox4i1	8	0.222773	0.102369	0.414894
sp|P56960|EXOSX_MOUSE	Exosc10	6	-0.162896	0.104322	0.414894
sp|P61514|RL37A_MOUSE	Rpl37a	7	-0.190514	0.102847	0.414894
sp|P62852|RS25_MOUSE	Rps25	15	0.570164	0.103205	0.414894
sp|Q05816|FABP5_MOUSE	Fabp5	4	-0.654935	0.106006	0.414894
sp|Q6PGC1|DHX29_MOUSE	Dhx29	6	0.653099	0.104265	0.414894
sp|Q6PHZ5|RB15B_MOUSE	Rbm15b	12	0.200579	0.105384	0.414894
sp|Q80UG5|SEPT9_MOUSE	Septin09	27	-0.303943	0.103321	0.414894
sp|Q8BKC5|IPO5_MOUSE	Ipo5	5	-0.476854	0.105784	0.414894
sp|Q8BX10|PGAM5_MOUSE	Pgam5	10	0.566842	0.105753	0.414894
sp|Q8K363|DDX18_MOUSE	Ddx18	12	0.542371	0.10382	0.414894
sp|Q99KI0|ACON_MOUSE	Aco2	17	0.220365	0.105547	0.414894
sp|Q9EPU0|RENT1_MOUSE	Upf1	19	-0.230497	0.104836	0.414894
sp|Q9R0H0|ACOX1_MOUSE	Acox1	17	0.263549	0.10366	0.414894
sp|P46735|MYO1B_MOUSE	Myo1b	11	-0.228779	0.10642	0.415047
sp|Q05512|MARK2_MOUSE	Mark2	3	0.449348	0.106634	0.415047
sp|P25444|RS2_MOUSE	Rps2	21	0.336434	0.107336	0.416628
sp|Q9JKV1|ADRM1_MOUSE	Adrm1	3	-1.01296	0.107652	0.416708
sp|O35685|NUDC_MOUSE	Nudc	4	-0.320728	0.108676	0.417494
sp|P17141|ZFP37_MOUSE	Zfp37	11	0.278252	0.109335	0.417494
sp|P48962|ADT1_MOUSE	Slc25a4	16	0.30216	0.109337	0.417494
sp|P61082|UBC12_MOUSE	Ube2m	3	-0.191066	0.108789	0.417494
sp|P68510|1433F_MOUSE	Ywhah	2	-0.76107	0.108483	0.417494
sp|Q9CZ13|QCR1_MOUSE	Uqcrc1	18	0.143802	0.110256	0.419868
sp|P50431|GLYC_MOUSE	Shmt1	1	0.594305	0.110873	0.419947
sp|Q9Z108|STAU1_MOUSE	Stau1	20	0.433065	0.110858	0.419947
sp|P68033|ACTC_MOUSE	Actc1	3	-0.823856	0.111907	0.421597
sp|Q9WTL7|LYPA2_MOUSE	Lypla2	2	-0.966646	0.111866	0.421597
sp|Q64378|FKBP5_MOUSE	Fkbp5	3	-0.429368	0.112763	0.421786
sp|Q80ZE5|MPRB_MOUSE	Paqr8	1	-0.392734	0.112569	0.421786
sp|Q9CQP0|RM33_MOUSE	Mrpl33	2	1.03719	0.112855	0.421786
sp|P70168|IMB1_MOUSE	Kpnb1	9	-0.258939	0.113569	0.422663
sp|Q9CYG7|TOM34_MOUSE	Tomm34	1	0.239589	0.11369	0.422663
sp|Q9CWL8|CTBL1_MOUSE	Ctnnbl1	1	-0.437875	0.114203	0.423452
sp|O55142|RL35A_MOUSE	Rpl35a	16	-0.212055	0.115234	0.424559
sp|P11499|HS90B_MOUSE	Hsp90ab1	47	-0.242967	0.114867	0.424559
sp|Q6ZPZ3|ZC3H4_MOUSE	Zc3h4	6	0.389599	0.115405	0.424559
sp|P47962|RL5_MOUSE	Rpl5	22	-0.223468	0.116505	0.425538
sp|Q61687|ATRX_MOUSE	Atrx	6	1.02539	0.116849	0.425538
sp|Q99K28|ARFG2_MOUSE	Arfgap2	1	-0.422489	0.11688	0.425538
sp|Q9JJ80|RPF2_MOUSE	Rpf2	4	-0.245855	0.116687	0.425538
sp|P35979|RL12_MOUSE	Rpl12	11	-0.227116	0.117189	0.425565
sp|P13439|UMPS_MOUSE	Umps	4	-0.143702	0.118191	0.427025
sp|Q62446|FKBP3_MOUSE	Fkbp3	7	0.620267	0.118339	0.427025
sp|Q8BHK1|NIPA1_MOUSE	Nipa1	1	-1.2056	0.1185	0.427025
sp|P84104|SRSF3_MOUSE	Srsf3	15	-0.203313	0.119343	0.427874
sp|Q9D824|FIP1_MOUSE	Fip1l1	2	0.469702	0.119202	0.427874
sp|Q8JZU2|TXTP_MOUSE	Slc25a1	8	0.547278	0.121416	0.434202
sp|Q8R1Q8|DC1L1_MOUSE	Dync1li1	2	-0.653992	0.122205	0.435917
sp|O35465|FKBP8_MOUSE	Fkbp8	8	-0.164308	0.123024	0.436008
sp|P61620|S61A1_MOUSE	Sec61a1	8	0.426505	0.123159	0.436008
sp|P84089|ERH_MOUSE	Erh	10	0.697153	0.1228	0.436008
sp|P05213|TBA1B_MOUSE	Tuba1b	2	-0.25547	0.123923	0.436519
sp|P62281|RS11_MOUSE	Rps11	24	0.432446	0.123831	0.436519
sp|O08553|DPYL2_MOUSE	Dpysl2	15	-0.18402	0.125577	0.438517
sp|Q8VDM6|HNRL1_MOUSE	Hnrnpul1	25	0.304128	0.125243	0.438517
sp|Q9CZU6|CISY_MOUSE	Cs	21	0.234128	0.124906	0.438517
sp|Q9R0A0|PEX14_MOUSE	Pex14	2	-0.904719	0.125735	0.438517
sp|Q9WTS2|FUT8_MOUSE	Fut8	5	-0.247149	0.126126	0.438796
sp|Q3UMU9|HDGR2_MOUSE	Hdgfrp2	9	0.207529	0.12776	0.442294
sp|Q91W18|TDRD3_MOUSE	Tdrd3	16	0.406275	0.127651	0.442294
sp|Q9QY76|VAPB_MOUSE	Vapb	8	0.186265	0.128443	0.443569
sp|Q9Z0N2|IF2H_MOUSE	Eif2s3y	1	1.18215	0.129191	0.443977
sp|Q9Z2I8|SUCB2_MOUSE	Suclg2	1	0.4748	0.129159	0.443977
sp|Q80UM7|MOGS_MOUSE	Mogs	3	0.276016	0.129869	0.445219
sp|Q5U4D9|THOC6_MOUSE	Thoc6	2	-1.08936	0.130303	0.445625
sp|P17426|AP2A1_MOUSE	Ap2a1	14	0.173529	0.132646	0.452537
sp|Q9D6X6|PRS23_MOUSE	Prss23	3	-0.645224	0.133615	0.454743
sp|Q9JLI8|SART3_MOUSE	Sart3	26	0.303538	0.134591	0.455862
sp|Q9Z1N5|DX39B_MOUSE	Ddx39b	11	-0.242275	0.134312	0.455862
sp|A6X919|D19L1_MOUSE	Dpy19l1	2	0.453948	0.135387	0.456363
sp|Q8BU14|SEC62_MOUSE	Sec62	10	0.228734	0.135387	0.456363
sp|P62889|RL30_MOUSE	Rpl30	11	0.145778	0.136398	0.458434
sp|Q07646|MEST_MOUSE	Mest	10	0.270301	0.136652	0.458434
sp|Q3UFY8|MRRP1_MOUSE	Trmt10c	4	-0.0890543	0.138232	0.461939
sp|Q7TT37|ELP1_MOUSE	Ikbkap	6	0.209722	0.138352	0.461939
sp|Q8QZT1|THIL_MOUSE	Acat1	18	0.503181	0.139164	0.463551
sp|O88569|ROA2_MOUSE	Hnrnpa2b1	44	0.524837	0.13978	0.464504
sp|O55131|SEPT7_MOUSE	Septin07	19	-0.17371	0.140879	0.467055
sp|O88796|RPP30_MOUSE	Rpp30	3	0.438914	0.141299	0.467188
sp|Q9CQ22|LTOR1_MOUSE	Lamtor1	2	-0.229151	0.141582	0.467188
sp|Q921F2|TADBP_MOUSE	Tardbp	14	0.235271	0.142066	0.467689
sp|O55128|SAP18_MOUSE	Sap18	9	0.265641	0.147265	0.46839
sp|P41105|RL28_MOUSE	Rpl28	15	-0.191463	0.143113	0.46839
sp|P61750|ARF4_MOUSE	Arf4	5	-0.272671	0.144288	0.46839
sp|P62137|PP1A_MOUSE	Ppp1ca	4	-0.267093	0.145545	0.46839
sp|Q02053|UBA1_MOUSE	Uba1	23	-0.215657	0.146208	0.46839
sp|Q3TIV5|ZC3HF_MOUSE	Zc3h15	3	0.216601	0.147133	0.46839
sp|Q5U4C3|SFR19_MOUSE	Scaf1	3	0.273336	0.147251	0.46839
sp|Q810B6|ANFY1_MOUSE	Ankfy1	2	-0.23702	0.143379	0.46839
sp|Q8BHS3|RBM22_MOUSE	Rbm22	3	0.181785	0.143253	0.46839
sp|Q8R1M2|H2AJ_MOUSE	H2afj	9	0.184169	0.146156	0.46839
sp|Q8VBZ3|CLPT1_MOUSE	Clptm1	7	0.11769	0.144302	0.46839
sp|Q91WM1|STRBP_MOUSE	Strbp	4	1.64394	0.14541	0.46839
sp|Q9CXW4|RL11_MOUSE	Rpl11	13	0.17187	0.144679	0.46839
sp|Q9D8T7|SLIRP_MOUSE	Slirp	8	-0.314854	0.147258	0.46839
sp|Q9Z1Z0|USO1_MOUSE	Uso1	2	-0.327241	0.147141	0.46839
sp|P61027|RAB10_MOUSE	Rab10	10	0.347724	0.148029	0.469758
sp|O35382|EXOC4_MOUSE	Exoc4	3	0.135645	0.149886	0.474582
sp|Q9CPP6|NDUA5_MOUSE	Ndufa5	5	0.199964	0.150256	0.474687
sp|Q9D1R9|RL34_MOUSE	Rpl34	8	-0.300346	0.152579	0.480949
sp|P62984|RL40_MOUSE	Uba52	1	0.782413	0.154156	0.484835
sp|P26231|CTNA1_MOUSE	Ctnna1	6	-0.551058	0.156621	0.491488
sp|Q9Z1P6|NDUA7_MOUSE	Ndufa7	8	0.152426	0.157278	0.492456
sp|Q99N96|RM01_MOUSE	Mrpl1	2	0.610487	0.157834	0.493099
sp|Q924C1|XPO5_MOUSE	Xpo5	4	0.179587	0.158753	0.494873
sp|Q6PDM2|SRSF1_MOUSE	Srsf1	22	0.20223	0.159396	0.495781
sp|Q01279|EGFR_MOUSE	Egfr	4	-0.126125	0.160595	0.498412
sp|Q9R0Q3|TMED2_MOUSE	Tmed2	4	0.286024	0.161809	0.501074
sp|Q922V4|PLRG1_MOUSE	Plrg1	5	-0.120876	0.162534	0.502215
sp|Q9WVR4|FXR2_MOUSE	Fxr2	15	0.37002	0.163359	0.502924
sp|Q9Z2D6|MECP2_MOUSE	Mecp2	2	-1.18827	0.163477	0.502924
sp|O35680|RT12_MOUSE	Mrps12	3	0.213845	0.165287	0.50371
sp|Q3UQN2|FCHO2_MOUSE	Fcho2	1	-1.93352	0.164853	0.50371
sp|Q91W43|GCSP_MOUSE	Gldc	4	0.386784	0.165878	0.50371
sp|Q9CQ54|NDUC2_MOUSE	Ndufc2	2	0.305014	0.164919	0.50371
sp|Q9D4J7|PHF6_MOUSE	Phf6	13	0.173887	0.165743	0.50371
sp|Q9WTU0|PHF2_MOUSE	Phf2	3	0.118483	0.165229	0.50371
sp|Q8BGD9|IF4B_MOUSE	Eif4b	6	0.61026	0.1667	0.505117
sp|P43275|H11_MOUSE	Hist1h1a	6	-0.251933	0.167226	0.505626
sp|P60710|ACTB_MOUSE	Actb	33	-0.195543	0.168637	0.506681
sp|Q8C8R3|ANK2_MOUSE	Ank2	35	-0.234241	0.168354	0.506681
sp|Q99JI4|PSMD6_MOUSE	Psmd6	4	-0.124142	0.168654	0.506681
sp|P63089|PTN_MOUSE	Ptn	10	-0.337648	0.169471	0.507081
sp|Q80U93|NU214_MOUSE	Nup214	4	-0.174943	0.169965	0.507081
sp|Q8VBT0|TMX1_MOUSE	Tmx1	2	0.160145	0.16952	0.507081
sp|Q9CVB6|ARPC2_MOUSE	Arpc2	4	-0.313739	0.170946	0.507081
sp|Q9CZW4|ACSL3_MOUSE	Acsl3	18	-0.428272	0.17085	0.507081
sp|Q9ERA6|TFP11_MOUSE	Tfip11	1	-0.206245	0.170748	0.507081
sp|P35700|PRDX1_MOUSE	Prdx1	7	0.244306	0.171895	0.507416
sp|P50544|ACADV_MOUSE	Acadvl	7	-0.404339	0.171692	0.507416
sp|P62082|RS7_MOUSE	Rps7	25	0.344216	0.172645	0.507416
sp|Q5ND52|MRM3_MOUSE	Mrm3	3	0.341448	0.172385	0.507416
sp|Q64331|MYO6_MOUSE	Myo6	34	-0.222189	0.17286	0.507416
sp|P80315|TCPD_MOUSE	Cct4	22	0.0975817	0.17358	0.508471
sp|Q99LF4|RTCB_MOUSE	Rtcb	23	0.329486	0.173942	0.508473
sp|E9PVA8|GCN1_MOUSE	Gcn1	37	-0.200506	0.174922	0.510279
sp|Q812A2|SRGP3_MOUSE	Srgap3	2	0.365323	0.177221	0.515917
sp|P11983|TCPA_MOUSE	Tcp1	18	0.358096	0.178859	0.51642
sp|P80314|TCPB_MOUSE	Cct2	25	0.25279	0.178493	0.51642
sp|Q8CG48|SMC2_MOUSE	Smc2	13	0.388961	0.177892	0.51642
sp|Q9CQQ7|AT5F1_MOUSE	Atp5f1	11	0.322035	0.178249	0.51642
sp|Q62203|SF3A2_MOUSE	Sf3a2	6	-0.250237	0.180455	0.519961
sp|P35980|RL18_MOUSE	Rpl18	14	-0.243937	0.180833	0.519977
sp|Q7TMM9|TBB2A_MOUSE	Tubb2a	10	-0.134913	0.181564	0.519977
sp|Q9CQJ4|RING2_MOUSE	Rnf2	3	-1.67904	0.181568	0.519977
sp|Q8K273|MMGT1_MOUSE	Mmgt1	5	0.1935	0.182415	0.521345
sp|O08740|RPB11_MOUSE	Polr2j	2	-0.187914	0.185744	0.529784
sp|A2AJI0|MA7D1_MOUSE	Map7d1	15	0.253729	0.186716	0.530408
sp|Q91VN6|DDX41_MOUSE	Ddx41	2	-0.532177	0.186614	0.530408
sp|P48678|LMNA_MOUSE	Lmna	9	0.200364	0.190554	0.531665
sp|P60603|ROMO1_MOUSE	Romo1	1	0.330282	0.188955	0.531665
sp|P63154|CRNL1_MOUSE	Crnkl1	2	0.520325	0.18998	0.531665
sp|Q62189|SNRPA_MOUSE	Snrpa	7	-0.18052	0.189818	0.531665
sp|Q7TMF2|ERI1_MOUSE	Eri1	6	0.247352	0.188366	0.531665
sp|Q8CIE6|COPA_MOUSE	Copa	44	-0.0967585	0.190205	0.531665
sp|Q91VD9|NDUS1_MOUSE	Ndufs1	29	0.270157	0.189827	0.531665
sp|Q9QXB9|DRG2_MOUSE	Drg2	3	0.265987	0.189055	0.531665
sp|Q9QYF1|RDH11_MOUSE	Rdh11	6	-0.275398	0.189967	0.531665
sp|O08709|PRDX6_MOUSE	Prdx6	2	0.230866	0.190945	0.531702
sp|A3KFM7|CHD6_MOUSE	Chd6	3	0.646427	0.192904	0.532582
sp|P53395|ODB2_MOUSE	Dbt	4	0.107908	0.193529	0.532582
sp|P62311|LSM3_MOUSE	Lsm3	3	0.985202	0.192676	0.532582
sp|P97311|MCM6_MOUSE	Mcm6	17	-0.22791	0.192684	0.532582
sp|Q9CQ75|NDUA2_MOUSE	Ndufa2	4	0.394793	0.193055	0.532582
sp|Q9D328|TM35A_MOUSE	Tmem35a	2	0.268496	0.193472	0.532582
sp|P09055|ITB1_MOUSE	Itgb1	11	-0.221601	0.195019	0.535636
sp|C0HKD8|MFA1A_MOUSE	Mfap1a	3	-0.0535783	0.201141	0.540157
sp|O88844|IDHC_MOUSE	Idh1	12	-0.521715	0.201601	0.540157
sp|P18608|HMGN1_MOUSE	Hmgn1	9	0.256843	0.198849	0.540157
sp|P20060|HEXB_MOUSE	Hexb	6	0.456756	0.198319	0.540157
sp|P62196|PRS8_MOUSE	Psmc5	17	-0.34425	0.20137	0.540157
sp|Q62318|TIF1B_MOUSE	Trim28	20	-0.285652	0.199611	0.540157
sp|Q6ZQ58|LARP1_MOUSE	Larp1	4	0.241565	0.200201	0.540157
sp|Q8BGY2|IF5A2_MOUSE	Eif5a2	5	-0.185057	0.199979	0.540157
sp|Q8CHY6|P66A_MOUSE	Gatad2a	2	0.147729	0.201648	0.540157
sp|Q8VIJ6|SFPQ_MOUSE	Sfpq	53	0.322	0.199736	0.540157
sp|Q91VK4|ITM2C_MOUSE	Itm2c	3	0.228889	0.198979	0.540157
sp|Q922D8|C1TC_MOUSE	Mthfd1	20	-0.278188	0.200979	0.540157
sp|Q99JX7|NXF1_MOUSE	Nxf1	22	0.272682	0.20082	0.540157
sp|O08547|SC22B_MOUSE	Sec22b	15	0.218424	0.206064	0.550937
sp|O35927|CTND2_MOUSE	Ctnnd2	2	-1.01131	0.206966	0.552301
sp|P60766|CDC42_MOUSE	Cdc42	1	-0.207002	0.207685	0.553173
sp|Q91WJ7|SPS2L_MOUSE	Spats2l	6	0.16424	0.209875	0.557951
sp|O88685|PRS6A_MOUSE	Psmc3	9	-0.144294	0.21065	0.558957
sp|O88291|ZN326_MOUSE	Znf326	17	0.185887	0.21859	0.559571
sp|P16254|SRP14_MOUSE	Srp14	5	0.0549686	0.22339	0.559571
sp|P20357|MTAP2_MOUSE	Map2	38	0.281441	0.217965	0.559571
sp|P28652|KCC2B_MOUSE	Camk2b	14	0.423981	0.212059	0.559571
sp|P43277|H13_MOUSE	Hist1h1d	3	-0.157727	0.215293	0.559571
sp|P48302|EDNRB_MOUSE	Ednrb	2	-0.652189	0.218494	0.559571
sp|P62908|RS3_MOUSE	Rps3	29	0.193395	0.221472	0.559571
sp|P68404|KPCB_MOUSE	Prkcb	2	-0.0095313	0.218432	0.559571
sp|Q3TDN2|FAF2_MOUSE	Faf2	2	-0.265741	0.218424	0.559571
sp|Q3UUQ7|PGAP1_MOUSE	Pgap1	7	0.447753	0.212141	0.559571
sp|Q60674|NR1D2_MOUSE	Nr1d2	1	-0.395218	0.22359	0.559571
sp|Q60710|SAMH1_MOUSE	Samhd1	1	0.5357	0.220407	0.559571
sp|Q60960|IMA5_MOUSE	Kpna1	2	-0.295871	0.222208	0.559571
sp|Q68FD5|CLH1_MOUSE	Cltc	51	-0.241283	0.216778	0.559571
sp|Q6ZWV3|RL10_MOUSE	Rpl10	19	-0.136911	0.21801	0.559571
sp|Q7TPD0|INT3_MOUSE	Ints3	2	0.208931	0.220437	0.559571
sp|Q8BMK4|CKAP4_MOUSE	Ckap4	41	0.108886	0.222571	0.559571
sp|Q8C0C7|SYFA_MOUSE	Farsa	8	0.164782	0.219189	0.559571
sp|Q8CFA2|GCST_MOUSE	Amt	2	-0.254252	0.219934	0.559571
sp|Q8R189|PAQRA_MOUSE	Mmd2	1	-0.314988	0.22093	0.559571
sp|Q8R4R6|NUP53_MOUSE	Nup35	5	-0.198031	0.221617	0.559571
sp|Q91WJ8|FUBP1_MOUSE	Fubp1	17	-0.0748043	0.217684	0.559571
sp|Q91WN1|DNJC9_MOUSE	Dnajc9	3	-0.771997	0.221233	0.559571
sp|Q922K7|NOP2_MOUSE	Nop2	8	-0.347617	0.217675	0.559571
sp|Q922Q4|P5CR2_MOUSE	Pycr2	9	0.175086	0.213344	0.559571
sp|Q99P72|RTN4_MOUSE	Rtn4	5	0.532904	0.221012	0.559571
sp|Q9D051|ODPB_MOUSE	Pdhb	11	0.141289	0.213704	0.559571
sp|Q9D6U8|F162A_MOUSE	Fam162a	3	-0.136986	0.220142	0.559571
sp|Q9D7N3|RT09_MOUSE	Mrps9	3	-0.22244	0.223283	0.559571
sp|Q9D8N0|EF1G_MOUSE	Eef1g	13	0.146673	0.223412	0.559571
sp|Q9DBS1|TMM43_MOUSE	Tmem43	4	-0.281612	0.221852	0.559571
sp|Q9DCD2|SYF1_MOUSE	Xab2	7	-0.132878	0.222207	0.559571
sp|A2APV2|FMNL2_MOUSE	Fmnl2	9	0.135796	0.234559	0.560159
sp|O08810|U5S1_MOUSE	Eftud2	38	-0.170353	0.227041	0.560159
sp|O54734|OST48_MOUSE	Ddost	14	0.207062	0.227862	0.560159
sp|P12787|COX5A_MOUSE	Cox5a	6	0.230936	0.233128	0.560159
sp|P24369|PPIB_MOUSE	Ppib	2	0.881084	0.224481	0.560159
sp|P31648|SC6A1_MOUSE	Slc6a1	1	-0.172753	0.226089	0.560159
sp|P51410|RL9_MOUSE	Rpl9	15	0.0633437	0.233649	0.560159
sp|P53994|RAB2A_MOUSE	Rab2a	4	0.0890473	0.229333	0.560159
sp|P62317|SMD2_MOUSE	Snrpd2	12	0.323398	0.22775	0.560159
sp|P62717|RL18A_MOUSE	Rpl18a	17	-0.325549	0.234033	0.560159
sp|P80316|TCPE_MOUSE	Cct5	16	0.249158	0.231221	0.560159
sp|P97807|FUMH_MOUSE	Fh	2	0.528662	0.234196	0.560159
sp|Q52KI8|SRRM1_MOUSE	Srrm1	13	0.0956439	0.228275	0.560159
sp|Q61072|ADAM9_MOUSE	Adam9	1	-0.397269	0.234193	0.560159
sp|Q61464|ZN638_MOUSE	Znf638	9	0.281212	0.226357	0.560159
sp|Q61881|MCM7_MOUSE	Mcm7	19	0.103758	0.231282	0.560159
sp|Q64152|BTF3_MOUSE	Btf3	7	0.26495	0.232688	0.560159
sp|Q6PGN3|DCLK2_MOUSE	Dclk2	24	0.238175	0.232474	0.560159
sp|Q8BSY0|ASPH_MOUSE	Asph	14	-0.0877408	0.227331	0.560159
sp|Q8BWW4|LARP4_MOUSE	Larp4	3	0.157472	0.2338	0.560159
sp|Q8VD12|Z385A_MOUSE	Znf385a	7	0.922974	0.229684	0.560159
sp|Q91YJ3|THYN1_MOUSE	Thyn1	7	-0.14339	0.231895	0.560159
sp|Q99NB9|SF3B1_MOUSE	Sf3b1	40	-0.201894	0.22765	0.560159
sp|Q9CR60|GOT1B_MOUSE	Golt1b	1	0.563542	0.234371	0.560159
sp|Q9R0N3|SYT11_MOUSE	Syt11	5	0.103583	0.231571	0.560159
sp|Q9R1C7|PR40A_MOUSE	Prpf40a	9	-0.156529	0.231854	0.560159
sp|Q9Z329|ITPR2_MOUSE	Itpr2	17	-0.408367	0.233473	0.560159
sp|P13864|DNMT1_MOUSE	Dnmt1	12	-0.257417	0.236172	0.562104
sp|Q91YE6|IPO9_MOUSE	Ipo9	4	0.159799	0.236145	0.562104
sp|P20029|GRP78_MOUSE	Hspa5	27	0.0749532	0.237699	0.564786
sp|O88455|DHCR7_MOUSE	Dhcr7	5	0.281392	0.244799	0.565457
sp|P27659|RL3_MOUSE	Rpl3	37	-0.143112	0.24572	0.565457
sp|P43006|EAA2_MOUSE	Slc1a2	4	0.0353064	0.246409	0.565457
sp|P54775|PRS6B_MOUSE	Psmc4	12	-0.293343	0.242385	0.565457
sp|P55258|RAB8A_MOUSE	Rab8a	2	-0.145929	0.24305	0.565457
sp|P56399|UBP5_MOUSE	Usp5	4	-0.0954344	0.238604	0.565457
sp|P62204|CALM_MOUSE	Calm1	5	0.129719	0.243133	0.565457
sp|P70333|HNRH2_MOUSE	Hnrnph2	7	0.238591	0.245284	0.565457
sp|Q3V1H1|CKAP2_MOUSE	Ckap2	2	-0.656461	0.239933	0.565457
sp|Q76MZ3|2AAA_MOUSE	Ppp2r1a	5	-0.133852	0.244654	0.565457
sp|Q8BP67|RL24_MOUSE	Rpl24	13	-0.241764	0.242411	0.565457
sp|Q8C0D4|RHG12_MOUSE	Arhgap12	2	-0.75374	0.246039	0.565457
sp|Q8R1I1|QCR9_MOUSE	Uqcr10	2	0.283736	0.242883	0.565457
sp|Q8VCM8|NCLN_MOUSE	Ncln	15	0.260693	0.241393	0.565457
sp|Q91YU8|SSF1_MOUSE	Ppan	1	-2.07057	0.242269	0.565457
sp|Q9CXY9|GPI8_MOUSE	Pigk	2	-0.330337	0.245561	0.565457
sp|Q9D024|CCD47_MOUSE	Ccdc47	19	0.100442	0.242279	0.565457
sp|Q9EQI8|RM46_MOUSE	Mrpl46	3	0.330663	0.238917	0.565457
sp|Q9ERS2|NDUAD_MOUSE	Ndufa13	3	0.376506	0.240363	0.565457
sp|Q9WTJ4|FIZ1_MOUSE	Fiz1	1	-0.630158	0.243333	0.565457
sp|Q9WUM4|COR1C_MOUSE	Coro1c	5	0.1664	0.245812	0.565457
sp|Q9QYI4|DJB12_MOUSE	Dnajb12	6	0.595096	0.246814	0.565465
sp|P54823|DDX6_MOUSE	Ddx6	8	0.395374	0.248004	0.566201
sp|Q9DBG3|AP2B1_MOUSE	Ap2b1	16	0.145462	0.247821	0.566201
sp|Q9JM63|KCJ10_MOUSE	Kcnj10	4	0.242703	0.248341	0.566201
sp|P07901|HS90A_MOUSE	Hsp90aa1	16	0.0879163	0.252416	0.566329
sp|Q3URQ0|TEX10_MOUSE	Tex10	5	0.711418	0.251703	0.566329
sp|Q61136|PRP4B_MOUSE	Prpf4b	6	-0.376689	0.251016	0.566329
sp|Q80Y17|L2GL1_MOUSE	Llgl1	9	0.174116	0.251547	0.566329
sp|Q8CCF0|PRP31_MOUSE	Prpf31	7	0.025763	0.2523	0.566329
sp|Q91VC3|IF4A3_MOUSE	Eif4a3	23	0.140764	0.250218	0.566329
sp|Q921T2|TOIP1_MOUSE	Tor1aip1	7	0.0733136	0.251574	0.566329
sp|Q9CR67|TMM33_MOUSE	Tmem33	6	0.662396	0.249881	0.566329
sp|Q9JIF7|COPB_MOUSE	Copb1	9	-0.209794	0.250963	0.566329
sp|Q9JJI8|RL38_MOUSE	Rpl38	6	0.47137	0.249765	0.566329
sp|Q9CQ69|QCR8_MOUSE	Uqcrq	4	0.663047	0.253018	0.566777
sp|Q91W50|CSDE1_MOUSE	Csde1	38	0.0150413	0.255785	0.572065
sp|B2RVL6|ZCH24_MOUSE	Zcchc24	3	-0.13006	0.257607	0.573409
sp|P14576|SRP54_MOUSE	Srp54	3	-0.356509	0.257552	0.573409
sp|Q6PCP5|MFF_MOUSE	Mff	1	0.869543	0.256875	0.573409
sp|P62320|SMD3_MOUSE	Snrpd3	7	0.184409	0.259686	0.574778
sp|P80317|TCPZ_MOUSE	Cct6a	17	0.229471	0.260504	0.574778
sp|Q80SW1|SAHH2_MOUSE	Ahcyl1	20	-0.363408	0.259395	0.574778
sp|Q8BHC4|DCAKD_MOUSE	Dcakd	10	-0.111667	0.26067	0.574778
sp|Q922Q8|LRC59_MOUSE	Lrrc59	20	0.199199	0.260596	0.574778
sp|Q9DC28|KC1D_MOUSE	Csnk1d	9	-0.13569	0.260052	0.574778
sp|P19253|RL13A_MOUSE	Rpl13a	16	-0.0879868	0.262824	0.577918
sp|P43406|ITAV_MOUSE	Itgav	8	-0.113284	0.262914	0.577918
sp|Q810A7|DDX42_MOUSE	Ddx42	10	-0.0247001	0.263878	0.578233
sp|Q99KP6|PRP19_MOUSE	Prpf19	21	-0.279454	0.2638	0.578233
sp|O35144|TERF2_MOUSE	Terf2	3	0.136711	0.264555	0.578818
sp|P70257|NFIX_MOUSE	Nfix	3	-0.194525	0.267285	0.581652
sp|Q6ZQ38|CAND1_MOUSE	Cand1	7	-0.0449142	0.26754	0.581652
sp|Q8R1A4|DOCK7_MOUSE	Dock7	5	-0.67075	0.266972	0.581652
sp|Q9DC16|ERGI1_MOUSE	Ergic1	4	0.3878	0.267037	0.581652
sp|Q9ER88|RT29_MOUSE	Dap3	4	0.332785	0.267915	0.581652
sp|P62911|RL32_MOUSE	Rpl32	9	-0.18185	0.268971	0.583047
sp|O08529|CAN2_MOUSE	Capn2	3	0.014801	0.270154	0.584061
sp|P32067|LA_MOUSE	Ssb	15	0.0942844	0.270657	0.584061
sp|P61255|RL26_MOUSE	Rpl26	21	0.293821	0.271269	0.584061
sp|P97351|RS3A_MOUSE	Rps3a	36	-0.139022	0.271926	0.584061
sp|Q78ZA7|NP1L4_MOUSE	Nap1l4	2	0.133651	0.271725	0.584061
sp|Q7TQH0|ATX2L_MOUSE	Atxn2l	4	0.231637	0.271661	0.584061
sp|O35143|ATIF1_MOUSE	Atpif1	4	0.123666	0.275301	0.584185
sp|O35841|API5_MOUSE	Api5	6	-0.028397	0.274939	0.584185
sp|P09411|PGK1_MOUSE	Pgk1	9	-0.253643	0.272983	0.584185
sp|P13707|GPDA_MOUSE	Gpd1	2	-0.414737	0.27465	0.584185
sp|P49586|PCY1A_MOUSE	Pcyt1a	1	-0.247121	0.273987	0.584185
sp|Q8BJ05|ZC3HE_MOUSE	Zc3h14	9	0.459677	0.274546	0.584185
sp|Q9D6K8|FUND2_MOUSE	Fundc2	1	0.205343	0.273437	0.584185
sp|Q9DB72|BTBDH_MOUSE	Btbd17	2	0.427349	0.273628	0.584185
sp|P29758|OAT_MOUSE	Oat	3	0.166815	0.276848	0.584944
sp|P97801|SMN_MOUSE	Smn1	2	-0.381175	0.277732	0.584944
sp|Q8BK64|AHSA1_MOUSE	Ahsa1	5	-0.341202	0.277531	0.584944
sp|Q8BSQ9|PB1_MOUSE	Pbrm1	5	0.0667101	0.278117	0.584944
sp|Q91W92|BORG5_MOUSE	Cdc42ep1	4	0.328572	0.278565	0.584944
sp|Q99L04|DHRS1_MOUSE	Dhrs1	4	-0.656181	0.2775	0.584944
sp|Q9CYN2|SPCS2_MOUSE	Spcs2	8	0.0582443	0.278478	0.584944
sp|Q6PD26|PIGS_MOUSE	Pigs	3	0.250807	0.281216	0.589634
sp|O55135|IF6_MOUSE	Eif6	3	0.154284	0.281666	0.5897
sp|P62141|PP1B_MOUSE	Ppp1cb	15	0.102728	0.282825	0.590371
sp|P70398|USP9X_MOUSE	Usp9x	1	-0.148743	0.282537	0.590371
sp|P62962|PROF1_MOUSE	Pfn1	4	-0.396552	0.28359	0.591091
sp|Q99PU5|ACBG1_MOUSE	Acsbg1	24	-0.348469	0.285299	0.593776
sp|P19096|FAS_MOUSE	Fasn	33	-0.259273	0.286018	0.594394
sp|Q08288|LYAR_MOUSE	Lyar	15	0.0948649	0.287362	0.595032
sp|Q922Q1|MARC2_MOUSE	Marc2	8	-0.13034	0.28711	0.595032
sp|Q9CQC6|BZW1_MOUSE	Bzw1	2	0.000830178	0.287629	0.595032
sp|Q9DC71|RT15_MOUSE	Mrps15	4	0.298668	0.288014	0.595032
sp|Q7TPV4|MBB1A_MOUSE	Mybbp1a	54	0.194438	0.290479	0.598675
sp|Q9D898|ARP5L_MOUSE	Arpc5l	1	-0.408165	0.290627	0.598675
sp|P57780|ACTN4_MOUSE	Actn4	13	-0.183251	0.291635	0.599875
sp|Q8BIF9|ZN787_MOUSE	Znf787	4	0.415133	0.292921	0.601641
sp|P18760|COF1_MOUSE	Cfl1	6	-0.198982	0.300007	0.60258
sp|P20152|VIME_MOUSE	Vim	72	-0.101359	0.296764	0.60258
sp|P23198|CBX3_MOUSE	Cbx3	2	-0.383891	0.294312	0.60258
sp|P23475|XRCC6_MOUSE	Xrcc6	3	0.0816621	0.298768	0.60258
sp|P46978|STT3A_MOUSE	Stt3a	11	0.332792	0.300047	0.60258
sp|P62242|RS8_MOUSE	Rps8	19	-0.325225	0.300473	0.60258
sp|P80313|TCPH_MOUSE	Cct7	12	0.155162	0.297589	0.60258
sp|Q6P4T2|U520_MOUSE	Snrnp200	52	-0.166214	0.298567	0.60258
sp|Q6P5D8|SMHD1_MOUSE	Smchd1	21	-0.192567	0.300648	0.60258
sp|Q6PFR5|TRA2A_MOUSE	Tra2a	9	0.292639	0.297015	0.60258
sp|Q8C156|CND2_MOUSE	Ncaph	3	0.0510216	0.294396	0.60258
sp|Q91VR2|ATPG_MOUSE	Atp5c1	12	0.0470815	0.299416	0.60258
sp|Q91YQ5|RPN1_MOUSE	Rpn1	40	0.155377	0.299852	0.60258
sp|Q9CWZ3|RBM8A_MOUSE	Rbm8a	2	0.144005	0.295018	0.60258
sp|Q9CYL5|GAPR1_MOUSE	Glipr2	2	0.175809	0.296689	0.60258
sp|Q9CZX9|EMC4_MOUSE	Emc4	6	0.156831	0.299957	0.60258
sp|Q9Z0R9|FADS2_MOUSE	Fads2	18	0.129451	0.296543	0.60258
sp|Q80TV8|CLAP1_MOUSE	Clasp1	14	0.240432	0.303608	0.607648
sp|O70252|HMOX2_MOUSE	Hmox2	5	-0.051903	0.308136	0.608459
sp|P32020|NLTP_MOUSE	Scp2	2	1.38222	0.311032	0.608459
sp|P47754|CAZA2_MOUSE	Capza2	6	-0.354387	0.30622	0.608459
sp|P47757|CAPZB_MOUSE	Capzb	4	-0.385619	0.312094	0.608459
sp|P62849|RS24_MOUSE	Rps24	9	0.226654	0.309614	0.608459
sp|P67778|PHB_MOUSE	Phb	14	0.205829	0.310513	0.608459
sp|P97450|ATP5J_MOUSE	Atp5j	5	0.0747859	0.308404	0.608459
sp|P97760|RPB3_MOUSE	Polr2c	3	0.0582515	0.307929	0.608459
sp|Q60605|MYL6_MOUSE	Myl6	5	-0.0529146	0.312219	0.608459
sp|Q6ZQI3|MLEC_MOUSE	Mlec	13	0.164721	0.312029	0.608459
sp|Q7TMF3|NDUAC_MOUSE	Ndufa12	3	0.165713	0.30979	0.608459
sp|Q80W54|FACE1_MOUSE	Zmpste24	5	-0.383163	0.30969	0.608459
sp|Q8CGY8|OGT1_MOUSE	Ogt	2	-0.324654	0.309322	0.608459
sp|Q920B9|SP16H_MOUSE	Supt16h	15	-0.0903252	0.30838	0.608459
sp|Q9CR57|RL14_MOUSE	Rpl14	13	-0.1231	0.305028	0.608459
sp|Q9CYS6|CB072_MOUSE	NA	2	0.104786	0.311879	0.608459
sp|Q9R190|MTA2_MOUSE	Mta2	6	-0.0426943	0.310589	0.608459
sp|Q9WUK2|IF4H_MOUSE	Eif4h	4	-0.157178	0.310003	0.608459
sp|Q9Z1Z2|STRAP_MOUSE	Strap	11	-0.120909	0.304557	0.608459
sp|Q99LY9|NDUS5_MOUSE	Ndufs5	4	0.248707	0.313262	0.608892
sp|Q9D0E1|HNRPM_MOUSE	Hnrnpm	55	-0.138263	0.313722	0.608892
sp|Q9QYJ0|DNJA2_MOUSE	Dnaja2	7	0.0722831	0.313737	0.608892
sp|P16546|SPTN1_MOUSE	Sptan1	6	-0.193757	0.31487	0.610251
sp|Q8CI51|PDLI5_MOUSE	Pdlim5	11	-0.180506	0.316234	0.612052
sp|Q8BTI8|SRRM2_MOUSE	Srrm2	31	0.124949	0.317755	0.614153
sp|Q9QYR6|MAP1A_MOUSE	Map1a	26	0.212798	0.31864	0.615019
sp|Q61656|DDX5_MOUSE	Ddx5	50	0.176408	0.320591	0.617938
sp|Q91V01|MBOA5_MOUSE	Lpcat3	1	0.183677	0.321223	0.618311
sp|Q62086|PON2_MOUSE	Pon2	6	-0.218192	0.322872	0.62035
sp|Q8C753|K0556_MOUSE	Kiaa0556	1	0.103258	0.323163	0.62035
sp|Q8BWT1|THIM_MOUSE	Acaa2	8	0.172807	0.324455	0.621982
sp|Q99PV0|PRP8_MOUSE	Prpf8	73	-0.113803	0.324906	0.622001
sp|P97386|DNLI3_MOUSE	Lig3	2	-0.364339	0.329091	0.623239
sp|Q5SUF2|LC7L3_MOUSE	Luc7l3	14	0.431507	0.328202	0.623239
sp|Q791T5|MTCH1_MOUSE	Mtch1	3	-0.680855	0.328433	0.623239
sp|Q9CQT2|RBM7_MOUSE	Rbm7	4	0.132553	0.329007	0.623239
sp|Q9DC70|NDUS7_MOUSE	Ndufs7	5	0.00857791	0.326381	0.623239
sp|Q9QY81|PO210_MOUSE	Nup210	11	-0.166631	0.32732	0.623239
sp|Q9QZD8|DIC_MOUSE	Slc25a10	2	0.129562	0.328874	0.623239
sp|Q9Z2I9|SUCB1_MOUSE	Sucla2	10	0.12341	0.327878	0.623239
sp|Q9QZQ8|H2AY_MOUSE	H2afy	12	0.0467882	0.329621	0.623403
sp|Q8R0X7|SGPL1_MOUSE	Sgpl1	25	-0.126552	0.330656	0.624523
sp|Q6NZN0|RBM26_MOUSE	Rbm26	6	0.280001	0.33184	0.625124
sp|Q8BKE6|CP20A_MOUSE	Cyp20a1	3	0.376287	0.331862	0.625124
sp|A2AGT5|CKAP5_MOUSE	Ckap5	26	-0.276142	0.332606	0.625691
sp|Q6ZWY3|RS27L_MOUSE	Rps27l	2	-0.0527191	0.333287	0.625701
sp|Q8BTM8|FLNA_MOUSE	Flna	12	-0.269889	0.3335	0.625701
sp|Q9EP97|SENP3_MOUSE	Senp3	4	-0.320143	0.33451	0.626761
sp|P68040|RACK1_MOUSE	Rack1	5	-0.501821	0.336538	0.628946
sp|P70399|TP53B_MOUSE	Tp53bp1	2	0.0344561	0.339237	0.628946
sp|P97822|AN32E_MOUSE	Anp32e	4	0.31161	0.338263	0.628946
sp|Q61033|LAP2A_MOUSE	Tmpo	7	-0.234494	0.339354	0.628946
sp|Q61584|FXR1_MOUSE	Fxr1	34	0.140671	0.339003	0.628946
sp|Q78IS1|TMED3_MOUSE	Tmed3	6	-0.165613	0.337907	0.628946
sp|Q91XI1|DUS3L_MOUSE	Dus3l	10	-0.0198279	0.339693	0.628946
sp|Q9CY66|GAR1_MOUSE	Gar1	6	0.0921022	0.338233	0.628946
sp|Q9ER00|STX12_MOUSE	Stx12	3	-0.0231629	0.336673	0.628946
sp|P62245|RS15A_MOUSE	Rps15a	16	0.165806	0.341253	0.631004
sp|Q9DBE8|ALG2_MOUSE	Alg2	2	0.284291	0.344542	0.635419
sp|Q9JLM8|DCLK1_MOUSE	Dclk1	6	0.276627	0.344158	0.635419
sp|Q8CBE3|WDR37_MOUSE	Wdr37	3	0.751103	0.345201	0.635801
sp|Q8VDN2|AT1A1_MOUSE	Atp1a1	4	0.0958379	0.345914	0.636283
sp|Q6PDG5|SMRC2_MOUSE	Smarcc2	6	-0.117304	0.346432	0.636405
sp|B1AZI6|THOC2_MOUSE	Thoc2	6	-0.0957311	0.347155	0.636902
sp|Q8BP92|RCN2_MOUSE	Rcn2	3	-0.374534	0.348898	0.638779
sp|Q8K2C9|HACD3_MOUSE	Hacd3	3	-0.375065	0.349085	0.638779
sp|Q8BXK8|AGAP1_MOUSE	Agap1	4	-0.0982862	0.35045	0.639617
sp|Q8R3F5|FABD_MOUSE	Mcat	1	-4.47304	0.350014	0.639617
sp|P68433|H31_MOUSE	Hist1h3a	11	0.0301629	0.352276	0.642118
sp|Q7TQI3|OTUB1_MOUSE	Otub1	2	-0.348097	0.353663	0.643813
sp|P99024|TBB5_MOUSE	Tubb5	4	-0.0984578	0.357843	0.649744
sp|Q8K0C4|CP51A_MOUSE	Cyp51a1	7	-0.238964	0.357523	0.649744
sp|A2BE28|LAS1L_MOUSE	Las1l	2	-0.816489	0.35856	0.650208
sp|Q99LC3|NDUAA_MOUSE	Ndufa10	6	0.0657856	0.359924	0.651842
sp|Q9CX56|PSMD8_MOUSE	Psmd8	4	-0.0835302	0.360827	0.652639
sp|P51807|DYLT1_MOUSE	Dynlt1	1	0.47123	0.362841	0.6546
sp|Q08943|SSRP1_MOUSE	Ssrp1	4	0.095678	0.362563	0.6546
sp|P08226|APOE_MOUSE	Apoe	18	0.0518344	0.364296	0.655913
sp|P53026|RL10A_MOUSE	Rpl10a	17	0.189629	0.365896	0.655913
sp|P63037|DNJA1_MOUSE	Dnaja1	5	0.154622	0.365435	0.655913
sp|Q2TPA8|HSDL2_MOUSE	Hsdl2	6	0.2979	0.365516	0.655913
sp|Q9WV60|GSK3B_MOUSE	Gsk3b	5	0.0275141	0.365764	0.655913
sp|Q8BM55|TM214_MOUSE	Tmem214	3	-0.100234	0.367089	0.656136
sp|Q8CCJ3|UFL1_MOUSE	Ufl1	5	-0.110752	0.367899	0.656136
sp|Q9CU62|SMC1A_MOUSE	Smc1a	26	-0.0760239	0.368349	0.656136
sp|Q9CWF2|TBB2B_MOUSE	Tubb2b	2	0.106815	0.3671	0.656136
sp|Q9QXS1|PLEC_MOUSE	Plec	4	0.128987	0.367671	0.656136
sp|Q62186|SSRD_MOUSE	Ssr4	7	0.0826055	0.370321	0.657986
sp|Q9D0D3|PAPD1_MOUSE	Mtpap	4	0.0957374	0.369977	0.657986
sp|P28656|NP1L1_MOUSE	Nap1l1	4	-0.200322	0.371381	0.659038
sp|Q8BI72|CARF_MOUSE	Cdkn2aip	7	0.0972789	0.372	0.659272
sp|Q9JKF1|IQGA1_MOUSE	Iqgap1	11	0.0659117	0.372449	0.659272
sp|Q64521|GPDM_MOUSE	Gpd2	17	0.0625697	0.375754	0.661261
sp|Q8BNJ2|ATS4_MOUSE	Adamts4	4	0.118413	0.37567	0.661261
sp|Q8VC70|RBMS2_MOUSE	Rbms2	3	0.0975053	0.375601	0.661261
sp|Q9D753|EXOS8_MOUSE	Exosc8	1	-0.663671	0.375919	0.661261
sp|Q9R1J0|NSDHL_MOUSE	Nsdhl	2	0.126947	0.37547	0.661261
sp|O35343|IMA3_MOUSE	Kpna4	3	0.106424	0.377183	0.661831
sp|P25206|MCM3_MOUSE	Mcm3	19	-0.161981	0.377019	0.661831
sp|Q9R0Q7|TEBP_MOUSE	Ptges3	4	-0.342333	0.377726	0.66196
sp|Q9QYC0|ADDA_MOUSE	Add1	12	-0.175832	0.378228	0.662016
sp|P63101|1433Z_MOUSE	Ywhaz	6	0.461446	0.3793	0.662272
sp|Q9Z2I0|LETM1_MOUSE	Letm1	5	-0.0293226	0.379314	0.662272
sp|Q61655|DD19A_MOUSE	Ddx19a	5	0.669129	0.381485	0.665237
sp|Q80SY5|PR38B_MOUSE	Prpf38b	4	0.20094	0.382257	0.66576
sp|P47758|SRPRB_MOUSE	Srprb	6	0.159559	0.38416	0.668249
sp|P97820|M4K4_MOUSE	Map4k4	26	-0.0387624	0.385736	0.668539
sp|Q8K284|TF3C1_MOUSE	Gtf3c1	13	-0.3116	0.3853	0.668539
sp|Q9CSN1|SNW1_MOUSE	Snw1	7	-0.0718266	0.38575	0.668539
sp|Q8BVY0|RL1D1_MOUSE	Rsl1d1	23	0.0806932	0.386557	0.669114
sp|P62307|RUXF_MOUSE	Snrpf	1	0.480648	0.388304	0.671028
sp|Q9D0M3|CY1_MOUSE	Cyc1	8	0.113952	0.388615	0.671028
sp|P14148|RL7_MOUSE	Rpl7	28	-0.196249	0.39109	0.671255
sp|P62301|RS13_MOUSE	Rps13	11	0.174446	0.39494	0.671255
sp|P63168|DYL1_MOUSE	Dynll1	2	-0.242219	0.391806	0.671255
sp|Q02526|ZFP41_MOUSE	Zfp41	2	0.427464	0.393782	0.671255
sp|Q61191|HCFC1_MOUSE	Hcfc1	3	0.074851	0.394282	0.671255
sp|Q61335|BAP31_MOUSE	Bcap31	13	0.209449	0.391527	0.671255
sp|Q6P2L7|CASC4_MOUSE	Casc4	3	-0.206298	0.390831	0.671255
sp|Q80W00|PP1RA_MOUSE	Ppp1r10	6	0.138902	0.391195	0.671255
sp|Q8BKZ9|ODPX_MOUSE	Pdhx	1	-1.07264	0.390296	0.671255
sp|Q8BUR4|DOCK1_MOUSE	Dock1	4	-0.0722209	0.394513	0.671255
sp|Q8VCC9|SPON1_MOUSE	Spon1	18	0.125582	0.392844	0.671255
sp|Q91V61|SFXN3_MOUSE	Sfxn3	6	-0.287398	0.39406	0.671255
sp|Q922P9|GLYR1_MOUSE	Glyr1	23	0.267838	0.393159	0.671255
sp|Q7TNV0|DEK_MOUSE	Dek	9	0.0680449	0.395779	0.671871
sp|Q62167|DDX3X_MOUSE	Ddx3x	36	0.0842987	0.397075	0.671962
sp|Q91V81|RBM42_MOUSE	Rbm42	3	0.307317	0.397263	0.671962
sp|Q9D903|EBP2_MOUSE	Ebna1bp2	3	-0.179831	0.396466	0.671962
sp|O70492|SNX3_MOUSE	Snx3	7	-0.0378122	0.398462	0.673182
sp|O08756|HCD2_MOUSE	Hsd17b10	10	0.393083	0.400589	0.674084
sp|Q80UU9|PGRC2_MOUSE	Pgrmc2	3	0.110496	0.40091	0.674084
sp|Q99104|MYO5A_MOUSE	Myo5a	37	-0.0975677	0.400377	0.674084
sp|Q9D0F3|LMAN1_MOUSE	Lman1	12	0.0498669	0.399606	0.674084
sp|Q6ZWX6|IF2A_MOUSE	Eif2s1	23	0.106581	0.401869	0.674088
sp|Q8R050|ERF3A_MOUSE	Gspt1	4	-0.0180288	0.401465	0.674088
sp|Q61074|PPM1G_MOUSE	Ppm1g	2	0.280477	0.402706	0.674688
sp|Q6A0A9|F120A_MOUSE	FAM120A	38	0.185814	0.40427	0.675701
sp|Q9JKR6|HYOU1_MOUSE	Hyou1	5	-0.0666539	0.404077	0.675701
sp|Q61137|ASTN1_MOUSE	Astn1	2	0.295911	0.405651	0.677206
sp|O70378|EMC8_MOUSE	Emc8	8	0.103266	0.406257	0.677416
sp|Q8BFQ4|WDR82_MOUSE	Wdr82	4	0.103603	0.407613	0.678679
sp|Q99KF1|TMED9_MOUSE	Tmed9	7	0.151654	0.407978	0.678679
sp|P47802|MTX1_MOUSE	Mtx1	2	-0.102366	0.409355	0.680166
sp|Q9CY50|SSRA_MOUSE	Ssr1	2	0.0982468	0.411047	0.682174
sp|P52503|NDUS6_MOUSE	Ndufs6	3	-0.046193	0.412034	0.6822
sp|P55066|NCAN_MOUSE	Ncan	8	0.0184227	0.412415	0.6822
sp|Q01320|TOP2A_MOUSE	Top2a	2	0.0396789	0.41291	0.6822
sp|Q9ESX5|DKC1_MOUSE	Dkc1	10	0.0336296	0.412999	0.6822
sp|P53784|SOX3_MOUSE	Sox3	4	0.0406426	0.413762	0.682659
sp|O09106|HDAC1_MOUSE	Hdac1	6	0.0897648	0.41563	0.684273
sp|P51660|DHB4_MOUSE	Hsd17b4	26	0.0792888	0.416197	0.684273
sp|Q9CS84|NRX1A_MOUSE	Nrxn1	7	0.362069	0.415825	0.684273
sp|Q4FK66|PR38A_MOUSE	Prpf38a	5	0.242288	0.416952	0.684715
sp|P08775|RPB1_MOUSE	Polr2a	18	0.369909	0.418626	0.686664
sp|Q791V5|MTCH2_MOUSE	Mtch2	5	-0.00485869	0.420571	0.688251
sp|Q8BG32|PSD11_MOUSE	Psmd11	8	0.00127863	0.420441	0.688251
sp|P14733|LMNB1_MOUSE	Lmnb1	44	-0.13141	0.422776	0.691058
sp|Q9CW03|SMC3_MOUSE	Smc3	34	0.0458698	0.426398	0.696169
sp|O09167|RL21_MOUSE	Rpl21	11	-0.284452	0.429505	0.697015
sp|P62983|RS27A_MOUSE	Rps27a	9	-0.014199	0.428391	0.697015
sp|Q80UM3|NAA15_MOUSE	Naa15	11	-0.0348202	0.428993	0.697015
sp|Q80V26|IMPA3_MOUSE	Impad1	6	-0.145053	0.429883	0.697015
sp|Q8BGH2|SAM50_MOUSE	Samm50	2	0.168829	0.429249	0.697015
sp|Q9CYH6|RRS1_MOUSE	Rrs1	2	-0.347706	0.428596	0.697015
sp|Q9DBL1|ACDSB_MOUSE	Acadsb	3	-0.195347	0.430566	0.697319
sp|P49962|SRP09_MOUSE	Srp9	2	0.0287485	0.431125	0.697423
sp|O88487|DC1I2_MOUSE	Dync1i2	3	-0.532836	0.439674	0.710436
sp|P58252|EF2_MOUSE	Eef2	23	-0.0883888	0.443532	0.71585
sp|Q6P9Z1|SMRD3_MOUSE	Smarcd3	2	-0.0398978	0.444389	0.716412
sp|Q7TMB8|CYFP1_MOUSE	Cyfip1	6	-0.272431	0.445169	0.71685
sp|Q8R323|RFC3_MOUSE	Rfc3	4	-0.290766	0.445853	0.717131
sp|O70318|E41L2_MOUSE	Epb41l2	13	-0.109111	0.44713	0.717547
sp|Q9QYF9|NDRG3_MOUSE	Ndrg3	3	-0.153926	0.446942	0.717547
sp|F8VPU2|FARP1_MOUSE	Farp1	8	-0.0526374	0.44848	0.718533
sp|Q62511|ZFP91_MOUSE	Zfp91	2	0.13085	0.449042	0.718533
sp|Q8BRH0|TMTC3_MOUSE	Tmtc3	3	0.481887	0.449275	0.718533
sp|Q61316|HSP74_MOUSE	Hspa4	5	-0.53573	0.451417	0.721142
sp|P40124|CAP1_MOUSE	Cap1	7	-0.00332846	0.453222	0.721931
sp|P84228|H32_MOUSE	Hist1h3b	1	2.33472	0.452617	0.721931
sp|Q8R2Y8|PTH2_MOUSE	Ptrh2	3	-0.210699	0.453929	0.721931
sp|Q9CRC8|LRC40_MOUSE	Lrrc40	3	0.0242104	0.454473	0.721931
sp|Q9CX30|YIF1B_MOUSE	Yif1b	1	-0.175018	0.4543	0.721931
sp|Q99NH0|ANR17_MOUSE	Ankrd17	5	0.347726	0.455024	0.721992
sp|Q3UVX5|GRM5_MOUSE	Grm5	3	0.204026	0.45883	0.722212
sp|Q6GQT9|NOMO1_MOUSE	Nomo1	30	0.256343	0.455757	0.722212
sp|Q6P9S0|MTSSL_MOUSE	Mtss1l	8	-0.0124998	0.456237	0.722212
sp|Q8CFG0|SULF2_MOUSE	Sulf2	15	-0.0166179	0.456733	0.722212
sp|Q9CZM2|RL15_MOUSE	Rpl15	15	-0.152802	0.459263	0.722212
sp|Q9DCJ5|NDUA8_MOUSE	Ndufa8	8	0.1712	0.458449	0.722212
sp|Q9JIW9|RALB_MOUSE	Ralb	3	0.102076	0.457404	0.722212
sp|Q9Z2X1|HNRPF_MOUSE	Hnrnpf	16	-0.0457018	0.458075	0.722212
sp|P51150|RAB7A_MOUSE	Rab7a	7	0.159036	0.462881	0.723325
sp|P70288|HDAC2_MOUSE	Hdac2	2	0.325565	0.465081	0.723325
sp|Q5XJY5|COPD_MOUSE	Arcn1	6	-0.120342	0.463011	0.723325
sp|Q8BFY9|TNPO1_MOUSE	Tnpo1	11	-0.204146	0.466131	0.723325
sp|Q8BFZ9|ERLN2_MOUSE	Erlin2	16	-0.110995	0.462096	0.723325
sp|Q8CAQ8|MIC60_MOUSE	Immt	42	-0.051894	0.462003	0.723325
sp|Q8K3A9|MEPCE_MOUSE	Mepce	2	0.0170967	0.464773	0.723325
sp|Q99LC5|ETFA_MOUSE	Etfa	7	0.147973	0.461667	0.723325
sp|Q9CR62|M2OM_MOUSE	Slc25a11	9	0.265593	0.465295	0.723325
sp|Q9CY58|PAIRB_MOUSE	Serbp1	17	0.0404663	0.466083	0.723325
sp|Q9DBZ1|IKIP_MOUSE	Ikbip	8	0.16712	0.464246	0.723325
sp|Q9QYH6|MAGD1_MOUSE	Maged1	6	0.242504	0.4652	0.723325
sp|Q61753|SERA_MOUSE	Phgdh	15	-0.0852642	0.468039	0.725456
sp|Q8C2Q3|RBM14_MOUSE	Rbm14	22	0.222743	0.468535	0.725456
sp|P63073|IF4E_MOUSE	Eif4e	4	-0.231129	0.469275	0.725805
sp|O08663|MAP2_MOUSE	Metap2	5	0.279388	0.471033	0.72631
sp|Q61550|RAD21_MOUSE	Rad21	3	-0.24876	0.470545	0.72631
sp|Q925N0|SFXN5_MOUSE	Sfxn5	14	0.2226	0.471148	0.72631
sp|A2AN08|UBR4_MOUSE	Ubr4	6	-0.099424	0.472236	0.726805
sp|P63038|CH60_MOUSE	Hspd1	24	0.166911	0.472501	0.726805
sp|Q921M3|SF3B3_MOUSE	Sf3b3	18	-0.0459739	0.473486	0.727028
sp|Q9JHU4|DYHC1_MOUSE	Dync1h1	128	-0.134041	0.473677	0.727028
sp|O35295|PURB_MOUSE	Purb	15	0.137621	0.47471	0.727819
sp|Q9CWK8|SNX2_MOUSE	Snx2	2	-0.164127	0.475658	0.728481
sp|P28667|MRP_MOUSE	Marcksl1	3	-0.127968	0.478271	0.730893
sp|Q9ERU3|ZNF22_MOUSE	Znf22	9	-0.138367	0.477915	0.730893
sp|Q6A026|PDS5A_MOUSE	Pds5a	13	-0.0565418	0.478919	0.731092
sp|Q3UPL0|SC31A_MOUSE	Sec31a	10	-0.0789733	0.479711	0.731508
sp|P42208|SEPT2_MOUSE	Septin02	14	-0.237861	0.482721	0.735165
sp|Q920F6|SMC1B_MOUSE	Smc1b	3	-0.343328	0.483153	0.735165
sp|P26041|MOES_MOUSE	Msn	6	0.25742	0.485305	0.736848
sp|Q9DCL9|PUR6_MOUSE	Paics	7	-0.323528	0.484814	0.736848
sp|B2RQC6|PYR1_MOUSE	Cad	12	-0.261222	0.487175	0.737366
sp|P16858|G3P_MOUSE	Gapdh	26	0.0858273	0.489833	0.737366
sp|P62869|ELOB_MOUSE	Elob	2	0.00033807	0.48896	0.737366
sp|P70404|IDHG1_MOUSE	Idh3g	7	-0.0476878	0.489592	0.737366
sp|Q61543|GSLG1_MOUSE	Glg1	15	0.201272	0.486261	0.737366
sp|Q62448|IF4G2_MOUSE	Eif4g2	7	0.0147307	0.4892	0.737366
sp|Q920Q6|MSI2H_MOUSE	Msi2	15	0.155583	0.489546	0.737366
sp|Q9CPQ3|TOM22_MOUSE	Tomm22	3	0.0492618	0.488762	0.737366
sp|Q9EQH3|VPS35_MOUSE	Vps35	3	-0.439858	0.490676	0.737847
sp|Q80WV3|CHST2_MOUSE	Chst2	11	0.117948	0.491254	0.737929
sp|P26645|MARCS_MOUSE	Marcks	8	-0.315405	0.495201	0.740825
sp|P30681|HMGB2_MOUSE	Hmgb2	18	0.0546507	0.495811	0.740825
sp|Q8C3F2|F120C_MOUSE	Fam120c	35	0.156241	0.495145	0.740825
sp|Q8K3J1|NDUS8_MOUSE	Ndufs8	4	-0.121017	0.49483	0.740825
sp|Q9R020|ZRAB2_MOUSE	Zranb2	2	-0.0905225	0.495494	0.740825
sp|P03995|GFAP_MOUSE	Gfap	57	-0.0316523	0.496885	0.741643
sp|Q6PIE5|AT1A2_MOUSE	Atp1a2	47	0.0628279	0.498315	0.74299
sp|P46935|NEDD4_MOUSE	Nedd4	2	0.259231	0.49916	0.743464
sp|O70152|DPM1_MOUSE	Dpm1	3	0.113244	0.499817	0.743656
sp|Q60972|RBBP4_MOUSE	Rbbp4	5	0.0745835	0.500561	0.743977
sp|Q8BJW6|EIF2A_MOUSE	Eif2a	6	-0.0684176	0.501278	0.744257
sp|P62835|RAP1A_MOUSE	Rap1a	4	0.0651823	0.503729	0.746878
sp|Q99MJ9|DDX50_MOUSE	Ddx50	18	0.129007	0.504103	0.746878
sp|P35486|ODPA_MOUSE	Pdha1	11	-0.0983085	0.504885	0.747252
sp|Q9WTX2|PRKRA_MOUSE	Prkra	12	0.229462	0.50649	0.74884
sp|O88665|BRD7_MOUSE	Brd7	1	0.223096	0.508305	0.750736
sp|P13011|ACOD2_MOUSE	Scd2	6	0.553165	0.510382	0.7516
sp|P21619|LMNB2_MOUSE	Lmnb2	4	0.213601	0.512738	0.7516
sp|P61028|RAB8B_MOUSE	Rab8b	3	-0.0925387	0.511444	0.7516
sp|P61089|UBE2N_MOUSE	Ube2n	3	-0.066708	0.509576	0.7516
sp|P62858|RS28_MOUSE	Rps28	7	-0.161333	0.512335	0.7516
sp|Q91XA2|GOLM1_MOUSE	Golm1	1	0.230085	0.513158	0.7516
sp|Q9CQS8|SC61B_MOUSE	Sec61b	2	0.175031	0.512263	0.7516
sp|Q9D1G2|PMVK_MOUSE	Pmvk	2	-0.117316	0.513058	0.7516
sp|P59017|B2L13_MOUSE	Bcl2l13	1	1.27482	0.515533	0.753512
sp|Q8CBY3|LENG8_MOUSE	Leng8	2	0.142156	0.515452	0.753512
sp|O35691|PININ_MOUSE	Pnn	13	0.274952	0.516498	0.754141
sp|P62855|RS26_MOUSE	Rps26	5	-0.0190804	0.518664	0.754177
sp|P62900|RL31_MOUSE	Rpl31	11	0.211966	0.517643	0.754177
sp|Q8K4Z5|SF3A1_MOUSE	Sf3a1	3	-0.256828	0.517702	0.754177
sp|Q9D8W5|PSD12_MOUSE	Psmd12	9	-0.376344	0.518511	0.754177
sp|O35737|HNRH1_MOUSE	Hnrnph1	20	-0.0545944	0.52071	0.755592
sp|O55143|AT2A2_MOUSE	Atp2a2	39	-0.167806	0.520259	0.755592
sp|O54984|ASNA_MOUSE	Asna1	4	0.0526189	0.522675	0.757554
sp|P56959|FUS_MOUSE	Fus	14	-0.215362	0.523674	0.757554
sp|Q9D823|RL37_MOUSE	Rpl37	3	0.607245	0.523639	0.757554
sp|Q8VHE0|SEC63_MOUSE	Sec63	18	0.153539	0.524507	0.757638
sp|Q9QX47|SON_MOUSE	Son	8	0.164073	0.525346	0.757638
sp|Q9Z204|HNRPC_MOUSE	Hnrnpc	23	-0.112807	0.525239	0.757638
sp|O35900|LSM2_MOUSE	Lsm2	4	0.0311873	0.528487	0.760265
sp|P0C0S6|H2AZ_MOUSE	H2afz	2	-0.399239	0.531849	0.760265
sp|P31938|MP2K1_MOUSE	Map2k1	5	-0.111981	0.530928	0.760265
sp|P54276|MSH6_MOUSE	Msh6	13	-0.00063908	0.528816	0.760265
sp|P60867|RS20_MOUSE	Rps20	9	0.227333	0.531271	0.760265
sp|Q8CGC6|RBM28_MOUSE	Rbm28	4	0.254369	0.531001	0.760265
sp|Q8K194|SNR27_MOUSE	Snrnp27	3	0.389323	0.532024	0.760265
sp|Q9CPX7|RT16_MOUSE	Mrps16	3	-0.336	0.530116	0.760265
sp|Q9DBN5|LONP2_MOUSE	Lonp2	5	-0.0158577	0.528895	0.760265
sp|P11031|TCP4_MOUSE	Sub1	9	0.293452	0.535038	0.763799
sp|O35593|PSDE_MOUSE	Psmd14	5	-0.0733074	0.535831	0.764155
sp|Q3TVI8|PBIP1_MOUSE	Pbxip1	26	0.00883678	0.538477	0.765604
sp|Q61070|EI24_MOUSE	Ei24	3	-0.0906796	0.537551	0.765604
sp|Q9ERU9|RBP2_MOUSE	Ranbp2	7	0.375625	0.53823	0.765604
sp|Q80X50|UBP2L_MOUSE	Ubap2l	15	0.075941	0.539597	0.766332
sp|Q9DCW4|ETFB_MOUSE	Etfb	4	0.0598507	0.54023	0.766332
sp|Q9QY06|MYO9B_MOUSE	Myo9b	3	0.106449	0.54062	0.766332
sp|Q6NV83|SR140_MOUSE	U2surp	22	-0.200122	0.54217	0.766986
sp|Q9WV32|ARC1B_MOUSE	Arpc1b	2	0.0307686	0.541686	0.766986
sp|P43247|MSH2_MOUSE	Msh2	5	0.302917	0.543219	0.767177
sp|Q04447|KCRB_MOUSE	Ckb	25	-0.193928	0.543778	0.767177
sp|Q8BH59|CMC1_MOUSE	Slc25a12	3	-0.258844	0.543939	0.767177
sp|Q02248|CTNB1_MOUSE	Ctnnb1	6	-0.143125	0.545515	0.767863
sp|Q9D023|MPC2_MOUSE	Mpc2	3	-0.538522	0.545383	0.767863
sp|Q923G2|RPAB3_MOUSE	Polr2h	1	-0.676474	0.546119	0.767945
sp|Q80X85|RT07_MOUSE	Mrps7	3	0.387064	0.547427	0.769018
sp|P10922|H10_MOUSE	H1f0	9	0.0792202	0.549865	0.769554
sp|P32233|DRG1_MOUSE	Drg1	13	0.171777	0.551178	0.769554
sp|Q62188|DPYL3_MOUSE	Dpysl3	6	-0.127848	0.550855	0.769554
sp|Q6ZWQ7|SPCS3_MOUSE	Spcs3	2	0.0867431	0.548882	0.769554
sp|Q9CQD1|RAB5A_MOUSE	Rab5a	2	-0.490626	0.550684	0.769554
sp|Q9CRB9|MIC19_MOUSE	Chchd3	12	-0.0465477	0.551632	0.769554
sp|Q9D7G0|PRPS1_MOUSE	Prps1	2	0.24798	0.551371	0.769554
sp|P97310|MCM2_MOUSE	Mcm2	14	0.0843252	0.552646	0.770207
sp|P38647|GRP75_MOUSE	Hspa9	36	0.13356	0.553571	0.770733
sp|P42669|PURA_MOUSE	Pura	7	0.0168629	0.554969	0.770892
sp|Q99K48|NONO_MOUSE	Nono	45	0.0844592	0.555326	0.770892
sp|Q9QZD9|EIF3I_MOUSE	Eif3i	8	-0.0804303	0.554281	0.770892
sp|B9EJ86|OSBL8_MOUSE	Osbpl8	3	0.227147	0.559519	0.771438
sp|P99027|RLA2_MOUSE	Rplp2	6	0.0368944	0.559799	0.771438
sp|Q07813|BAX_MOUSE	Bax	2	-0.0215464	0.556511	0.771438
sp|Q8R326|PSPC1_MOUSE	Pspc1	24	-0.245493	0.559596	0.771438
sp|Q8R3Q0|SARAF_MOUSE	Saraf	1	0.141588	0.557721	0.771438
sp|Q9D0T1|NH2L1_MOUSE	Snu13	3	-0.175643	0.559252	0.771438
sp|Q9D2E2|TOE1_MOUSE	Toe1	2	0.86308	0.558197	0.771438
sp|Q9Z1Q5|CLIC1_MOUSE	Clic1	3	0.0239437	0.5601	0.771438
sp|O35286|DHX15_MOUSE	Dhx15	34	0.113521	0.56628	0.776218
sp|P43274|H14_MOUSE	Hist1h1e	9	-0.244319	0.566325	0.776218
sp|Q8BMF4|ODP2_MOUSE	Dlat	7	0.0328302	0.56553	0.776218
sp|Q8CCK0|H2AW_MOUSE	H2afy2	6	0.397225	0.565378	0.776218
sp|Q8K224|NAT10_MOUSE	Nat10	6	0.238159	0.566194	0.776218
sp|P34022|RANG_MOUSE	Ranbp1	2	-1.36261	0.571176	0.782106
sp|P17751|TPIS_MOUSE	Tpi1	2	0.54524	0.572539	0.782167
sp|P61358|RL27_MOUSE	Rpl27	16	0.0127624	0.572886	0.782167
sp|Q71M36|CSPG5_MOUSE	Cspg5	3	-0.0250729	0.57203	0.782167
sp|Q9JKN5|OLIG1_MOUSE	Olig1	7	0.166285	0.575281	0.784677
sp|Q9Z0U1|ZO2_MOUSE	Tjp2	8	0.222182	0.576002	0.784901
sp|P62751|RL23A_MOUSE	Rpl23a	18	0.0783262	0.579704	0.788419
sp|Q8CH18|CCAR1_MOUSE	Ccar1	15	0.0932028	0.579174	0.788419
sp|P56564|EAA1_MOUSE	Slc1a3	8	-0.00499711	0.582241	0.791107
sp|Q9CPZ6|ORML3_MOUSE	Ormdl3	1	-0.00903033	0.584557	0.792724
sp|Q9CQC7|NDUB4_MOUSE	Ndufb4	4	-0.153363	0.584024	0.792724
sp|P26516|PSMD7_MOUSE	Psmd7	5	0.151854	0.58951	0.795884
sp|Q61686|CBX5_MOUSE	Cbx5	2	-0.0117488	0.589556	0.795884
sp|Q6ZQ88|KDM1A_MOUSE	Kdm1a	2	0.0258585	0.58884	0.795884
sp|Q99LR1|ABD12_MOUSE	Abhd12	12	0.134574	0.588788	0.795884
sp|Q9CZU3|SK2L2_MOUSE	Skiv2l2	2	-0.0749202	0.589711	0.795884
sp|Q62095|DDX3Y_MOUSE	Ddx3y	5	0.161223	0.590286	0.795897
sp|Q99L45|IF2B_MOUSE	Eif2s2	17	-0.0665107	0.591964	0.797397
sp|Q8VEM8|MPCP_MOUSE	Slc25a3	12	-0.512363	0.592894	0.797887
sp|P05063|ALDOC_MOUSE	Aldoc	17	-0.122846	0.59519	0.799449
sp|Q9WV55|VAPA_MOUSE	Vapa	12	0.0181955	0.595023	0.799449
sp|Q505F5|LRC47_MOUSE	Lrrc47	3	0.695318	0.596157	0.799809
sp|Q640R3|HECAM_MOUSE	Hepacam	6	0.0761325	0.596593	0.799809
sp|Q9D855|QCR7_MOUSE	Uqcrb	7	0.178136	0.601998	0.806288
sp|Q80XN0|BDH_MOUSE	Bdh1	4	-0.0927306	0.60305	0.80693
sp|Q9DBD5|PELP1_MOUSE	Pelp1	3	-0.288192	0.605646	0.809634
sp|P15864|H12_MOUSE	Hist1h1c	25	-0.114913	0.606999	0.810345
sp|Q8C854|MYEF2_MOUSE	Myef2	49	0.0323675	0.607327	0.810345
sp|P03975|IGEB_MOUSE	Iap	7	0.252691	0.610757	0.811846
sp|P61965|WDR5_MOUSE	Wdr5	1	0.43897	0.6094	0.811846
sp|Q04750|TOP1_MOUSE	Top1	28	0.247396	0.61051	0.811846
sp|Q9D0R2|SYTC_MOUSE	Tars	2	0.00099574	0.610161	0.811846
sp|Q99KV1|DJB11_MOUSE	Dnajb11	2	-0.323993	0.613364	0.814543
sp|Q921H8|THIKA_MOUSE	Acaa1a	5	0.256736	0.619879	0.821539
sp|Q99M28|RNPS1_MOUSE	Rnps1	6	-0.00179449	0.620381	0.821539
sp|Q99PU8|DHX30_MOUSE	Dhx30	15	0.24052	0.620281	0.821539
sp|Q9DCH4|EIF3F_MOUSE	Eif3f	9	-0.116639	0.62281	0.823981
sp|Q4QQM4|P5I11_MOUSE	Trp53i11	3	0.228908	0.626343	0.827143
sp|Q9ERK4|XPO2_MOUSE	Cse1l	4	-0.217947	0.626375	0.827143
sp|P42227|STAT3_MOUSE	Stat3	14	-0.137576	0.627396	0.827675
sp|P47878|IBP3_MOUSE	Igfbp3	2	0.17468	0.628448	0.827675
sp|Q60932|VDAC1_MOUSE	Vdac1	20	-0.140903	0.628539	0.827675
sp|O54774|AP3D1_MOUSE	Ap3d1	5	0.115658	0.634606	0.829782
sp|O88343|S4A4_MOUSE	Slc4a4	11	-0.118658	0.639181	0.829782
sp|O89086|RBM3_MOUSE	Rbm3	9	-0.122685	0.638386	0.829782
sp|P07742|RIR1_MOUSE	Rrm1	2	-0.812712	0.642507	0.829782
sp|P08752|GNAI2_MOUSE	Gnai2	18	-0.208253	0.637244	0.829782
sp|P26638|SYSC_MOUSE	Sars	3	0.201982	0.640862	0.829782
sp|P29416|HEXA_MOUSE	Hexa	4	-0.114429	0.639593	0.829782
sp|P47911|RL6_MOUSE	Rpl6	22	-0.0039523	0.640826	0.829782
sp|P49718|MCM5_MOUSE	Mcm5	26	-0.000819511	0.641472	0.829782
sp|P63017|HSP7C_MOUSE	Hspa8	35	0.028506	0.632199	0.829782
sp|Q3TAS6|EMC10_MOUSE	Emc10	5	0.0344821	0.634557	0.829782
sp|Q3UL36|ARGL1_MOUSE	Arglu1	8	-0.0280798	0.631755	0.829782
sp|Q64332|SYN2_MOUSE	Syn2	1	0.0816632	0.641934	0.829782
sp|Q8BZR9|NCBP3_MOUSE	Ncbp3	2	-0.284461	0.641562	0.829782
sp|Q8QZY1|EIF3L_MOUSE	Eif3l	8	0.0747746	0.632864	0.829782
sp|Q99LH2|PTSS1_MOUSE	Ptdss1	2	-0.723083	0.637478	0.829782
sp|Q9D0G0|RT30_MOUSE	Mrps30	3	0.176126	0.638711	0.829782
sp|Q9JJ28|FLII_MOUSE	Flii	4	-0.0788522	0.637792	0.829782
sp|Q9WTX5|SKP1_MOUSE	Skp1	4	-0.0206509	0.633451	0.829782
sp|Q9Z0X1|AIFM1_MOUSE	Aifm1	2	-0.240906	0.640628	0.829782
sp|Q9Z1Q9|SYVC_MOUSE	Vars	26	-0.0535709	0.632458	0.829782
sp|P68372|TBB4B_MOUSE	Tubb4b	34	-0.062804	0.643907	0.830829
sp|P21956|MFGM_MOUSE	Mfge8	4	-0.166097	0.647727	0.832211
sp|Q60930|VDAC2_MOUSE	Vdac2	18	-0.0692515	0.646051	0.832211
sp|Q9R099|TBL2_MOUSE	Tbl2	10	0.114755	0.646594	0.832211
sp|Q9R118|HTRA1_MOUSE	Htra1	3	0.120017	0.64714	0.832211
sp|Q9WUA2|SYFB_MOUSE	Farsb	9	-0.0549522	0.647932	0.832211
sp|Q9DBR1|XRN2_MOUSE	Xrn2	16	0.162639	0.650196	0.834359
sp|B9EJI9|T229A_MOUSE	Tmem229a	3	-0.0672232	0.651217	0.834869
sp|Q61545|EWS_MOUSE	Ewsr1	8	-0.0453656	0.651778	0.834869
sp|O35874|SATT_MOUSE	Slc1a4	1	-0.137645	0.65418	0.836658
sp|P35585|AP1M1_MOUSE	Ap1m1	5	-0.0364183	0.655387	0.836658
sp|P56671|MAZ_MOUSE	Maz	3	0.152942	0.657102	0.836658
sp|P62830|RL23_MOUSE	Rpl23	15	0.0374993	0.656638	0.836658
sp|Q6P5F7|TTYH3_MOUSE	Ttyh3	1	0.0847571	0.657332	0.836658
sp|Q6Y7W8|GGYF2_MOUSE	Gigyf2	1	-0.0862317	0.655202	0.836658
sp|Q8VDP4|CCAR2_MOUSE	Ccar2	19	-0.0100129	0.655731	0.836658
sp|P62192|PRS4_MOUSE	Psmc1	9	0.0479981	0.658681	0.837453
sp|Q60575|KIF1B_MOUSE	Kif1b	2	0.00301458	0.659145	0.837453
sp|Q60714|S27A1_MOUSE	Slc27a1	18	-0.253315	0.661414	0.837734
sp|Q8K1E0|STX5_MOUSE	Stx5	3	0.077739	0.66188	0.837734
sp|Q91WQ3|SYYC_MOUSE	Yars	16	0.0816402	0.662339	0.837734
sp|Q922U1|PRPF3_MOUSE	Prpf3	10	-0.0277279	0.661394	0.837734
sp|Q9WUA3|PFKAP_MOUSE	Pfkp	3	-0.0486712	0.661891	0.837734
sp|P62821|RAB1A_MOUSE	Rab1A	8	-0.0887723	0.663994	0.839074
sp|Q91ZX7|LRP1_MOUSE	Lrp1	2	0.440057	0.66504	0.839642
sp|P63260|ACTG_MOUSE	Actg1	1	-0.574626	0.668347	0.841866
sp|Q01853|TERA_MOUSE	Vcp	10	0.0248961	0.668593	0.841866
sp|Q99JB2|STML2_MOUSE	Stoml2	6	-0.068079	0.668542	0.841866
sp|Q91Z67|SRGP2_MOUSE	Srgap2	14	-0.00170477	0.669308	0.842013
sp|P62305|RUXE_MOUSE	Snrpe	1	-0.288395	0.671347	0.843825
sp|Q60865|CAPR1_MOUSE	Caprin1	20	-0.189371	0.672908	0.845034
sp|O70305|ATX2_MOUSE	Atxn2	5	-0.0490239	0.674527	0.845559
sp|Q9QYG0|NDRG2_MOUSE	Ndrg2	4	-0.154961	0.673981	0.845559
sp|Q01730|RSU1_MOUSE	Rsu1	3	0.135789	0.675852	0.846467
sp|O70551|SRPK1_MOUSE	Srpk1	2	-0.0236824	0.680686	0.848343
sp|P14206|RSSA_MOUSE	Rpsa	9	-0.196328	0.68074	0.848343
sp|P28658|ATX10_MOUSE	Atxn10	12	-0.163044	0.682012	0.848343
sp|P56391|CX6B1_MOUSE	Cox6b1	6	0.221444	0.682259	0.848343
sp|Q00PI9|HNRL2_MOUSE	Hnrnpul2	39	-0.145261	0.683136	0.848343
sp|Q1HFZ0|NSUN2_MOUSE	Nsun2	18	0.0870236	0.684831	0.848343
sp|Q3TKT4|SMCA4_MOUSE	Smarca4	12	-0.0113487	0.680407	0.848343
sp|Q99KU0|VMP1_MOUSE	Vmp1	2	0.0532529	0.681494	0.848343
sp|Q9D1D4|TMEDA_MOUSE	Tmed10	9	0.00282092	0.685177	0.848343
sp|Q9DAW9|CNN3_MOUSE	Cnn3	14	-0.15661	0.684009	0.848343
sp|Q9DCE5|PK1IP_MOUSE	Pak1ip1	9	0.104328	0.682132	0.848343
sp|Q9ESZ8|GTF2I_MOUSE	Gtf2i	20	-0.0596139	0.6851	0.848343
sp|Q9Z1D1|EIF3G_MOUSE	Eif3g	5	-0.511731	0.678863	0.848343
sp|P56135|ATPK_MOUSE	Atp5j2	3	-0.0127594	0.686273	0.848954
sp|Q8CGK3|LONM_MOUSE	Lonp1	5	0.199822	0.686904	0.848989
sp|Q9DB41|GHC2_MOUSE	Slc25a18	15	-0.0660521	0.690079	0.852166
sp|P05064|ALDOA_MOUSE	Aldoa	14	0.117123	0.69129	0.852914
sp|Q3V009|TMED1_MOUSE	Tmed1	4	-0.102878	0.692098	0.853164
sp|Q91WK2|EIF3H_MOUSE	Eif3h	3	-0.295396	0.693218	0.853797
sp|Q9DCM7|NACC2_MOUSE	Nacc2	1	-0.195186	0.696667	0.856689
sp|Q9Z2A7|DGAT1_MOUSE	Dgat1	2	-0.407716	0.696782	0.856689
sp|P31650|S6A11_MOUSE	Slc6a11	4	0.0270841	0.697841	0.857243
sp|Q9WUM5|SUCA_MOUSE	Suclg1	5	-0.145943	0.699078	0.858015
sp|Q9Z1T1|AP3B1_MOUSE	Ap3b1	4	-0.212305	0.699859	0.858226
sp|Q62376|RU17_MOUSE	Snrnp70	19	-0.00837791	0.702733	0.858475
sp|Q8R1V4|TMED4_MOUSE	Tmed4	5	-0.0463462	0.702169	0.858475
sp|Q9CRC0|VKOR1_MOUSE	Vkorc1	1	0.186782	0.701018	0.858475
sp|Q9CRY7|GDPD1_MOUSE	Gdpd1	2	-0.0721049	0.701525	0.858475
sp|Q9ET30|TM9S3_MOUSE	Tm9sf3	3	-0.250623	0.703109	0.858475
sp|Q8CFQ3|AQR_MOUSE	Aqr	3	-0.173962	0.70398	0.858794
sp|Q8VCH8|UBXN4_MOUSE	Ubxn4	3	-0.185712	0.705176	0.85951
sp|O70310|NMT1_MOUSE	Nmt1	8	0.175472	0.706741	0.860673
sp|Q8BH95|ECHM_MOUSE	Echs1	4	0.122118	0.707477	0.860824
sp|Q9WUR2|ECI2_MOUSE	Eci2	4	0.0535883	0.712423	0.866095
sp|P51174|ACADL_MOUSE	Acadl	6	-0.0127284	0.715466	0.866803
sp|Q8K297|GT251_MOUSE	Colgalt1	2	-0.0251926	0.714866	0.866803
sp|Q99JR1|SFXN1_MOUSE	Sfxn1	12	-0.0884783	0.715403	0.866803
sp|Q9DCA5|BRX1_MOUSE	Brix1	5	-0.215425	0.713781	0.866803
sp|Q9Z1M8|RED_MOUSE	Ik	8	0.0485767	0.71812	0.869271
sp|P39749|FEN1_MOUSE	Fen1	8	0.0801886	0.719112	0.869725
sp|Q9CXS4|CENPV_MOUSE	Cenpv	12	-0.065852	0.724606	0.875617
sp|P35762|CD81_MOUSE	Cd81	1	-0.509353	0.726358	0.876607
sp|Q6NS46|RRP5_MOUSE	Pdcd11	10	0.0869074	0.727291	0.876607
sp|Q9D1G1|RAB1B_MOUSE	Rab1b	2	-0.288102	0.726807	0.876607
sp|Q3TEA8|HP1B3_MOUSE	Hp1bp3	32	-0.0259384	0.729804	0.878134
sp|Q5XG73|ACBD5_MOUSE	Acbd5	6	0.102559	0.729661	0.878134
sp|B2RY56|RBM25_MOUSE	Rbm25	13	0.0503741	0.732028	0.879307
sp|P54071|IDHP_MOUSE	Idh2	15	-0.098948	0.731516	0.879307
sp|Q6PGH1|BUD31_MOUSE	Bud31	2	-0.114475	0.736352	0.883748
sp|E9PVX6|KI67_MOUSE	Mki67	3	-0.0299324	0.736999	0.883772
sp|A2RSY6|TRM1L_MOUSE	Trmt1l	2	-0.0681064	0.740999	0.887813
sp|P80318|TCPG_MOUSE	Cct3	26	-0.0194606	0.741664	0.887854
sp|Q9CR88|RT14_MOUSE	Mrps14	3	0.411983	0.744498	0.890491
sp|P59708|SF3B6_MOUSE	Sf3b6	3	-0.00968351	0.74816	0.893381
sp|Q05D44|IF2P_MOUSE	Eif5b	14	-0.126691	0.748792	0.893381
sp|Q6NZJ6|IF4G1_MOUSE	Eif4g1	19	-0.0741802	0.748817	0.893381
sp|Q6PE01|SNR40_MOUSE	Snrnp40	13	-0.0569955	0.751112	0.895361
sp|P69566|RANB9_MOUSE	Ranbp9	2	0.357855	0.751915	0.895561
sp|P43276|H15_MOUSE	Hist1h1b	14	-0.249255	0.753862	0.896364
sp|Q9CWX9|DDX47_MOUSE	Ddx47	3	-0.0603774	0.753615	0.896364
sp|Q9CQA3|SDHB_MOUSE	Sdhb	13	0.107193	0.754763	0.896679
sp|P27048|RSMB_MOUSE	Snrpb	7	0.177876	0.756498	0.897983
sp|Q60931|VDAC3_MOUSE	Vdac3	14	0.0860494	0.7588	0.899957
sp|Q3U0V1|FUBP2_MOUSE	Khsrp	36	0.108183	0.76083	0.901606
sp|Q61474|MSI1H_MOUSE	Msi1	8	0.0533247	0.761654	0.901824
sp|O08582|GTPB1_MOUSE	Gtpbp1	7	0.0267378	0.770047	0.903657
sp|O70311|NMT2_MOUSE	Nmt2	3	-0.196473	0.771911	0.903657
sp|P35282|RAB21_MOUSE	Rab21	2	-0.144474	0.768399	0.903657
sp|P47915|RL29_MOUSE	Rpl29	9	-0.0989217	0.773426	0.903657
sp|P52480|KPYM_MOUSE	Pkm	29	-0.151292	0.766159	0.903657
sp|P63321|RALA_MOUSE	Rala	2	-0.278278	0.766989	0.903657
sp|Q07417|ACADS_MOUSE	Acads	7	-0.0914614	0.770421	0.903657
sp|Q31125|S39A7_MOUSE	Slc39a7	3	0.213964	0.770308	0.903657
sp|Q61595|KTN1_MOUSE	Ktn1	32	-0.0234173	0.772319	0.903657
sp|Q8BLY1|SMOC1_MOUSE	Smoc1	2	-0.00928757	0.774056	0.903657
sp|Q8CCP0|NEMF_MOUSE	Nemf	7	-0.0769089	0.764667	0.903657
sp|Q8VHR5|P66B_MOUSE	Gatad2b	9	-0.00743792	0.763983	0.903657
sp|Q9CZX0|ELP3_MOUSE	Elp3	5	-0.0593808	0.774105	0.903657
sp|Q9D287|SPF27_MOUSE	Bcas2	3	-0.0462634	0.77048	0.903657
sp|Q9DCF9|SSRG_MOUSE	Ssr3	6	0.00866012	0.767936	0.903657
sp|Q9QXZ0|MACF1_MOUSE	Macf1	21	0.00129963	0.77067	0.903657
sp|Q9Z103|ADNP_MOUSE	Adnp	2	0.379473	0.772418	0.903657
sp|Q9CZW5|TOM70_MOUSE	Tomm70	10	-0.0403328	0.777679	0.907077
sp|P35564|CALX_MOUSE	Canx	35	-0.319283	0.779996	0.908251
sp|Q69ZK0|PREX1_MOUSE	Prex1	10	-0.324786	0.781908	0.908251
sp|Q9CQ62|DECR_MOUSE	Decr1	8	0.0970952	0.781015	0.908251
sp|Q9CQN1|TRAP1_MOUSE	Trap1	17	-0.0495123	0.780601	0.908251
sp|Q9CQY5|MAGT1_MOUSE	Magt1	6	0.185715	0.781681	0.908251
sp|Q99JF8|PSIP1_MOUSE	Psip1	21	-0.0706053	0.7847	0.910743
sp|Q8VEE4|RFA1_MOUSE	Rpa1	5	0.255354	0.786518	0.911351
sp|Q9EP69|SAC1_MOUSE	Sacm1l	17	-0.00410497	0.785914	0.911351
sp|Q91ZW3|SMCA5_MOUSE	Smarca5	43	0.147235	0.788231	0.911837
sp|Q9JKP5|MBNL1_MOUSE	Mbnl1	1	-0.0287091	0.787708	0.911837
sp|Q6GSS7|H2A2A_MOUSE	Hist2h2aa1	2	-0.252227	0.793011	0.916157
sp|Q9D8B4|NDUAB_MOUSE	Ndufa11	1	0.282737	0.793266	0.916157
sp|P17182|ENOA_MOUSE	Eno1	14	-0.252142	0.795661	0.917253
sp|P52479|UBP10_MOUSE	Usp10	5	-0.0141672	0.795637	0.917253
sp|Q8BRT1|CLAP2_MOUSE	Clasp2	26	-0.0355238	0.796167	0.917253
sp|Q91WD5|NDUS2_MOUSE	Ndufs2	7	-0.254167	0.801207	0.922304
sp|Q925I1|ATAD3_MOUSE	Atad3	13	0.299703	0.802827	0.923415
sp|P23116|EIF3A_MOUSE	Eif3a	51	0.0010267	0.806906	0.924293
sp|Q0P678|ZCH18_MOUSE	Zc3h18	5	-0.203565	0.810806	0.924293
sp|Q569Z5|DDX46_MOUSE	Ddx46	13	-0.12433	0.806754	0.924293
sp|Q6DFW4|NOP58_MOUSE	Nop58	19	0.0924111	0.806067	0.924293
sp|Q8BFR5|EFTU_MOUSE	Tufm	13	0.0458991	0.810795	0.924293
sp|Q91V04|TRAM1_MOUSE	Tram1	1	0.176994	0.808471	0.924293
sp|Q922F4|TBB6_MOUSE	Tubb6	8	-0.0188124	0.806133	0.924293
sp|Q99J95|CDK9_MOUSE	Cdk9	2	-0.0895984	0.810717	0.924293
sp|Q99KI3|EMC3_MOUSE	Emc3	7	-0.0182382	0.810376	0.924293
sp|Q9ES97|RTN3_MOUSE	Rtn3	1	0.0937686	0.80852	0.924293
sp|Q9Z0N1|IF2G_MOUSE	Eif2s3x	18	0.0223581	0.808095	0.924293
sp|O09118|NET1_MOUSE	Ntn1	9	0.225581	0.818208	0.927844
sp|P47955|RLA1_MOUSE	Rplp1	4	0.0942635	0.817341	0.927844
sp|P62264|RS14_MOUSE	Rps14	10	0.100402	0.817752	0.927844
sp|Q02780|NFIA_MOUSE	Nfia	5	-0.0486996	0.817488	0.927844
sp|Q8BGZ4|CDC23_MOUSE	Cdc23	3	0.0669423	0.818531	0.927844
sp|Q8BRF7|SCFD1_MOUSE	Scfd1	5	0.198171	0.817523	0.927844
sp|Q8C181|MBNL2_MOUSE	Mbnl2	5	0.107303	0.815268	0.927844
sp|P18242|CATD_MOUSE	Ctsd	4	-0.468016	0.820732	0.929591
sp|Q00899|TYY1_MOUSE	Yy1	2	0.62235	0.823471	0.929705
sp|Q6P542|ABCF1_MOUSE	Abcf1	13	0.0554398	0.823399	0.929705
sp|Q99N87|RT05_MOUSE	Mrps5	3	0.0241984	0.822457	0.929705
sp|Q9D0F6|RFC5_MOUSE	Rfc5	7	-0.0502718	0.823446	0.929705
sp|P63001|RAC1_MOUSE	Rac1	5	0.0804884	0.830186	0.933522
sp|P97863|NFIB_MOUSE	Nfib	8	0.0167164	0.829857	0.933522
sp|Q8BL97|SRSF7_MOUSE	Srsf7	10	-0.151322	0.828916	0.933522
sp|Q9CXZ1|NDUS4_MOUSE	Ndufs4	5	-0.145995	0.830828	0.933522
sp|Q9QYA2|TOM40_MOUSE	Tomm40	4	0.0219955	0.83042	0.933522
sp|Q9Z1X2|PTSS2_MOUSE	Ptdss2	2	-0.040983	0.827784	0.933522
sp|P62309|RUXG_MOUSE	Snrpg	4	0.0358116	0.831521	0.933556
sp|Q9CR68|UCRI_MOUSE	Uqcrfs1	8	-0.136963	0.833217	0.934715
sp|Q8BHI7|ELOV5_MOUSE	Elovl5	3	-0.049261	0.834945	0.934779
sp|Q8R404|MIC13_MOUSE	Mic13	5	0.368125	0.835263	0.934779
sp|Q9DBG7|SRPRA_MOUSE	Srpra	3	-0.116445	0.834402	0.934779
sp|P23242|CXA1_MOUSE	Gja1	1	0.0656535	0.841736	0.937518
sp|P35279|RAB6A_MOUSE	Rab6a	9	-0.106381	0.842904	0.937518
sp|P49717|MCM4_MOUSE	Mcm4	15	-0.0083128	0.842062	0.937518
sp|Q8CB77|ELOA1_MOUSE	Eloa	2	-0.00213303	0.842419	0.937518
sp|Q8R349|CDC16_MOUSE	Cdc16	2	0.0988154	0.841024	0.937518
sp|Q9CQH7|BT3L4_MOUSE	Btf3l4	4	-0.595185	0.838717	0.937518
sp|Q9EQQ2|YIPF5_MOUSE	Yipf5	1	0.35946	0.842311	0.937518
sp|Q9QUI0|RHOA_MOUSE	Rhoa	8	-0.0349611	0.843034	0.937518
sp|E1U8D0|SOGA1_MOUSE	Soga1	20	-0.0438805	0.843909	0.937535
sp|Q78IK4|MIC27_MOUSE	Apool	2	-0.00346262	0.845046	0.937535
sp|Q9EPE9|AT131_MOUSE	Atp13a1	16	0.0814587	0.844583	0.937535
sp|Q8BP47|SYNC_MOUSE	Nars	11	0.0967656	0.847676	0.939519
sp|Q8VE97|SRSF4_MOUSE	Srsf4	11	-0.0186949	0.848168	0.939519
sp|P14231|AT1B2_MOUSE	Atp1b2	8	0.0510314	0.852245	0.942554
sp|P28659|CELF1_MOUSE	Celf1	7	-0.0300983	0.852204	0.942554
sp|Q8C7X2|EMC1_MOUSE	Emc1	25	0.0509114	0.853309	0.94299
sp|P46638|RB11B_MOUSE	Rab11b	2	0.0412892	0.859174	0.947243
sp|P57784|RU2A_MOUSE	Snrpa1	6	-0.227114	0.858517	0.947243
sp|Q8JZN5|ACAD9_MOUSE	Acad9	3	-0.072665	0.858627	0.947243
sp|A2AR02|PPIG_MOUSE	Ppig	10	-0.169772	0.86096	0.948469
sp|Q61937|NPM_MOUSE	Npm1	21	-0.104524	0.864192	0.951286
sp|P14873|MAP1B_MOUSE	Map1b	1	0.0691018	0.866973	0.951412
sp|P83940|ELOC_MOUSE	Eloc	3	0.0720089	0.867007	0.951412
sp|Q91YT0|NDUV1_MOUSE	Ndufv1	14	0.0145566	0.866356	0.951412
sp|Q9D1E8|PLCE_MOUSE	Agpat5	5	0.0391539	0.866783	0.951412
sp|Q3UKJ7|SMU1_MOUSE	Smu1	5	0.106647	0.872146	0.956307
sp|Q9CRD2|EMC2_MOUSE	Emc2	14	0.117224	0.874071	0.957671
sp|P09602|HMGN2_MOUSE	Hmgn2	11	-0.0245041	0.875033	0.957732
sp|Q61263|SOAT1_MOUSE	Soat1	4	-0.15814	0.875486	0.957732
sp|P25976|UBF1_MOUSE	Ubtf	4	0.0210198	0.877228	0.957944
sp|P60843|IF4A1_MOUSE	Eif4a1	19	-0.0644626	0.878384	0.957944
sp|Q8BU03|PWP2_MOUSE	Pwp2	1	0.19424	0.879079	0.957944
sp|Q920L1|FADS1_MOUSE	Fads1	12	0.011865	0.878967	0.957944
sp|Q9CXW2|RT22_MOUSE	Mrps22	2	0.0955243	0.878723	0.957944
sp|P17742|PPIA_MOUSE	Ppia	9	-0.179662	0.881504	0.957949
sp|P62918|RL8_MOUSE	Rpl8	20	0.0674041	0.883162	0.957949
sp|P68369|TBA1A_MOUSE	Tuba1a	32	-0.0612351	0.881085	0.957949
sp|Q4VA53|PDS5B_MOUSE	Pds5b	27	-0.0676416	0.880574	0.957949
sp|Q64364|ARF_MOUSE	Cdkn2a	2	0.784707	0.882746	0.957949
sp|Q9CPP0|NPM3_MOUSE	Npm3	1	0.798825	0.881956	0.957949
sp|Q99MR6|SRRT_MOUSE	Srrt	9	0.0360691	0.884034	0.958157
sp|Q8VEH3|ARL8A_MOUSE	Arl8a	3	-0.0995539	0.887196	0.960233
sp|Q9EQ61|PESC_MOUSE	Pes1	2	-0.183804	0.887313	0.960233
sp|Q9WUK4|RFC2_MOUSE	Rfc2	6	-0.134421	0.889771	0.962154
sp|P17427|AP2A2_MOUSE	Ap2a2	5	-0.053596	0.890917	0.962651
sp|Q9CQZ5|NDUA6_MOUSE	Ndufa6	4	0.218241	0.891596	0.962651
sp|P27546|MAP4_MOUSE	Map4	35	-0.138986	0.894462	0.963185
sp|P51880|FABP7_MOUSE	Fabp7	10	0.0126013	0.893756	0.963185
sp|Q501J6|DDX17_MOUSE	Ddx17	25	-0.00854708	0.893184	0.963185
sp|Q6PDQ2|CHD4_MOUSE	Chd4	44	0.049562	0.895509	0.963185
sp|Q6ZWU9|RS27_MOUSE	Rps27	5	0.0527075	0.895293	0.963185
sp|Q8C052|MAP1S_MOUSE	Map1s	14	0.0134153	0.896986	0.964038
sp|P97855|G3BP1_MOUSE	G3bp1	19	-0.13972	0.899364	0.96527
sp|Q9CWJ9|PUR9_MOUSE	Atic	2	-0.245076	0.899503	0.96527
sp|Q6P5F9|XPO1_MOUSE	Xpo1	9	0.247921	0.900992	0.966086
sp|Q8CGF7|TCRG1_MOUSE	Tcerg1	5	0.0562548	0.901634	0.966086
sp|Q8VE37|RCC1_MOUSE	Rcc1	8	-0.291913	0.903021	0.966836
sp|O54781|SRPK2_MOUSE	Srpk2	3	-0.00775465	0.908716	0.967044
sp|P14094|AT1B1_MOUSE	Atp1b1	4	-0.144633	0.912597	0.967044
sp|P39447|ZO1_MOUSE	Tjp1	28	-0.0180584	0.90823	0.967044
sp|P43024|CX6A1_MOUSE	Cox6a1	2	-0.427198	0.905267	0.967044
sp|P59999|ARPC4_MOUSE	Arpc4	4	-0.0709265	0.909477	0.967044
sp|P62334|PRS10_MOUSE	Psmc6	15	-0.116145	0.910263	0.967044
sp|Q5U4E2|REPI1_MOUSE	Repin1	3	0.109045	0.909776	0.967044
sp|Q61029|LAP2B_MOUSE	Tmpo	27	-0.0236718	0.910706	0.967044
sp|Q6A065|CE170_MOUSE	Cep170	3	0.313448	0.912683	0.967044
sp|Q8K2B3|SDHA_MOUSE	Sdha	21	0.0729718	0.912824	0.967044
sp|Q8VDM4|PSMD2_MOUSE	Psmd2	5	-0.0508174	0.91108	0.967044
sp|Q91VS7|MGST1_MOUSE	Mgst1	6	-0.0845935	0.907831	0.967044
sp|Q9DCN2|NB5R3_MOUSE	Cyb5r3	11	-0.140959	0.909422	0.967044
sp|Q9DCT2|NDUS3_MOUSE	Ndufs3	7	-0.217231	0.906887	0.967044
sp|P62874|GBB1_MOUSE	Gnb1	8	0.115023	0.914748	0.967166
sp|Q8QZY9|SF3B4_MOUSE	Sf3b4	3	0.0837081	0.913872	0.967166
sp|Q9CY27|TECR_MOUSE	Tecr	9	0.0484677	0.914998	0.967166
sp|P52927|HMGA2_MOUSE	Hmga2	2	-0.558177	0.91844	0.969637
sp|Q3TDQ1|STT3B_MOUSE	Stt3b	19	-0.128566	0.919055	0.969637
sp|Q8K0Q5|RHG18_MOUSE	Arhgap18	4	0.372724	0.920088	0.969637
sp|Q9D517|PLCC_MOUSE	Agpat3	8	0.0363641	0.919687	0.969637
sp|P17095|HMGA1_MOUSE	Hmga1	5	-0.0590898	0.92204	0.970329
sp|Q99LE6|ABCF2_MOUSE	Abcf2	5	-0.111765	0.922123	0.970329
sp|O35226|PSMD4_MOUSE	Psmd4	4	0.0441846	0.924222	0.97155
sp|Q9JHW4|SELB_MOUSE	Eefsec	2	0.00488226	0.924662	0.97155
sp|P61161|ARP2_MOUSE	Actr2	5	0.0828692	0.927212	0.9735
sp|Q64511|TOP2B_MOUSE	Top2b	28	-0.0430802	0.927899	0.9735
sp|P37040|NCPR_MOUSE	Por	16	0.0577633	0.93088	0.9759
sp|Q9QXK3|COPG2_MOUSE	Copg2	1	0.0267932	0.934055	0.978501
sp|Q9R0L6|PCM1_MOUSE	Pcm1	3	0.25085	0.935444	0.979228
sp|P42932|TCPQ_MOUSE	Cct8	16	0.0111445	0.937644	0.979348
sp|Q8BNV1|TRM2A_MOUSE	Trmt2a	3	0.156218	0.937263	0.979348
sp|Q8C4J7|TBL3_MOUSE	Tbl3	2	-0.171951	0.937003	0.979348
sp|P59326|YTHD1_MOUSE	Ythdf1	2	-0.00103922	0.939336	0.980388
sp|P35821|PTN1_MOUSE	Ptpn1	4	-0.0857004	0.94098	0.98078
sp|P62754|RS6_MOUSE	Rps6	23	-0.076707	0.943888	0.98078
sp|P62827|RAN_MOUSE	Ran	17	0.171659	0.943409	0.98078
sp|Q3TXS7|PSMD1_MOUSE	Psmd1	8	-0.249626	0.942719	0.98078
sp|Q5SS80|DHR13_MOUSE	Dhrs13	4	-0.00246162	0.943042	0.98078
sp|Q80U58|PUM2_MOUSE	Pum2	6	0.0612037	0.941498	0.98078
sp|Q8K1M6|DNM1L_MOUSE	Dnm1l	7	0.089292	0.945865	0.98211
sp|Q91V41|RAB14_MOUSE	Rab14	3	-0.042044	0.950482	0.986178
sp|Q9D8E6|RL4_MOUSE	Rpl4	37	-0.109051	0.95145	0.986456
sp|G5E870|TRIPC_MOUSE	Trip12	35	0.0420909	0.954453	0.987542
sp|P35601|RFC1_MOUSE	Rfc1	7	-0.0462239	0.954032	0.987542
sp|Q62048|PEA15_MOUSE	Pea15	1	-0.00242425	0.9546	0.987542
sp|P18653|KS6A1_MOUSE	Rps6ka1	5	-0.048892	0.955995	0.987688
sp|P28660|NCKP1_MOUSE	Nckap1	6	-0.20155	0.956143	0.987688
sp|O35643|AP1B1_MOUSE	Ap1b1	3	0.221826	0.956936	0.987782
sp|Q925G2|CYBR1_MOUSE	Cybrd1	1	-0.0684293	0.961218	0.991476
sp|Q80WJ7|LYRIC_MOUSE	Mtdh	21	-0.0457422	0.96385	0.992737
sp|Q9WUQ2|PREB_MOUSE	Preb	9	-0.138289	0.963512	0.992737
sp|O88712|CTBP1_MOUSE	Ctbp1	7	-0.0708088	0.973327	0.995273
sp|P08043|ZFP2_MOUSE	Zfp2	3	0.288925	0.967489	0.995273
sp|P47963|RL13_MOUSE	Rpl13	21	0.0181032	0.971969	0.995273
sp|P61222|ABCE1_MOUSE	Abce1	7	-0.0889275	0.967956	0.995273
sp|P97379|G3BP2_MOUSE	G3bp2	18	-0.183337	0.97229	0.995273
sp|Q3U9G9|LBR_MOUSE	Lbr	12	-0.117261	0.969573	0.995273
sp|Q6ZWV7|RL35_MOUSE	Rpl35	10	-0.305445	0.972467	0.995273
sp|Q8JZQ9|EIF3B_MOUSE	Eif3b	16	-0.090695	0.974082	0.995273
sp|Q8K0L9|ZBT20_MOUSE	Zbtb20	5	-0.1533	0.97285	0.995273
sp|Q99PL5|RRBP1_MOUSE	Rrbp1	85	-0.0384491	0.971879	0.995273
sp|Q9Z315|SNUT1_MOUSE	Sart1	18	-0.108155	0.973649	0.995273
sp|P19157|GSTP1_MOUSE	Gstp1	3	-0.200902	0.98124	0.995552
sp|P60229|EIF3E_MOUSE	Eif3e	7	0.143941	0.978315	0.995552
sp|P62322|LSM5_MOUSE	Lsm5	1	-0.049464	0.977263	0.995552
sp|Q3U1G5|I20L2_MOUSE	Isg20l2	3	-0.0608828	0.979947	0.995552
sp|Q8R1B4|EIF3C_MOUSE	Eif3c	23	-0.0994904	0.979975	0.995552
sp|Q9CQV8|1433B_MOUSE	Ywhab	2	0.233501	0.981421	0.995552
sp|Q9D0I8|MRT4_MOUSE	Mrto4	4	0.0773049	0.977635	0.995552
sp|Q9D6R2|IDH3A_MOUSE	Idh3a	13	-0.00317633	0.97892	0.995552
sp|Q9DBG6|RPN2_MOUSE	Rpn2	18	-0.13915	0.977574	0.995552
sp|Q9EP72|EMC7_MOUSE	Emc7	9	0.00609991	0.980205	0.995552
sp|P84091|AP2M1_MOUSE	Ap2m1	16	-0.0196064	0.984305	0.99776
sp|Q6A068|CDC5L_MOUSE	Cdc5l	29	-0.077287	0.985194	0.997878
sp|Q9D7B7|GPX8_MOUSE	Gpx8	2	0.194456	0.986547	0.997878
sp|Q9Z2Q5|RM40_MOUSE	Mrpl40	3	0.102552	0.985955	0.997878
sp|P14115|RL27A_MOUSE	Rpl27a	12	-0.0607566	0.995478	0.998278
sp|P14685|PSMD3_MOUSE	Psmd3	15	-0.00912473	0.994382	0.998278
sp|P55096|ABCD3_MOUSE	Abcd3	30	-0.0959991	0.990308	0.998278
sp|P63158|HMGB1_MOUSE	Hmgb1	13	-0.0201661	0.990047	0.998278
sp|Q6URW6|MYH14_MOUSE	Myh14	5	0.152924	0.988956	0.998278
sp|Q8BMA6|SRP68_MOUSE	Srp68	13	0.0687902	0.989929	0.998278
sp|Q8CG47|SMC4_MOUSE	Smc4	14	-0.28991	0.993015	0.998278
sp|Q91WT9|CBS_MOUSE	Cbs	5	-0.289279	0.996153	0.998278
sp|Q91YR7|PRP6_MOUSE	Prpf6	17	-0.212305	0.991398	0.998278
sp|Q922J9|FACR1_MOUSE	Far1	1	-0.0919193	0.99606	0.998278
sp|Q9CPR4|RL17_MOUSE	Rpl17	20	-0.0796762	0.995939	0.998278
sp|Q9CQV1|TIM16_MOUSE	Pam16	1	-0.29716	0.992504	0.998278
sp|Q9EST5|AN32B_MOUSE	Anp32b	7	0.153149	0.995127	0.998278
sp|P12970|RL7A_MOUSE	Rpl7a	28	-0.00982284	0.998135	0.998492
sp|P14869|RLA0_MOUSE	Rplp0	18	-0.0523427	0.998492	0.998492
sp|P46471|PRS7_MOUSE	Psmc2	14	0.0404635	0.998352	0.998492

## Sheet: NFIB 3' UTR vs hybr.RNA curated
NFIB 3' UTR vs hybrid RNA minus bead binding proteins
proteinName	geneName	nbPeptides	log2ratio_3p_PD	pValue_3p_PD	qValue_3p_PD
sp|Q9WV02|RBMX_MOUSE	Rbmx	11	1.11734	0.00207327	0.0912887		Legend:		3' UTR - hairpin core
sp|Q921N6|DDX27_MOUSE	Ddx27	4	1.73481	0.0294604	0.272641			bold	3' UTR Flanking
sp|Q91WM1|STRBP_MOUSE	Strbp	4	1.64394	0.14541	0.46839			blue	AR ctrl
sp|Q8R1F0|L10K_MOUSE	D8Ertd738e	5	1.44264	0.0232219	0.242368
sp|Q99020|ROAA_MOUSE	Hnrnpab	29	1.29472	0.0168736	0.209449
sp|Q91VM5|RMXL1_MOUSE	Rbmxl1	56	1.2242	0.00519247	0.126141
sp|Q9CXY6|ILF2_MOUSE	Ilf2	21	1.1933	0.0085579	0.168613
sp|Q8VE22|RT23_MOUSE	Mrps23	4	1.09735	0.0140108	0.202488
sp|Q91YM4|TBRG4_MOUSE	Tbrg4	8	1.06844	0.00921449	0.168613
sp|Q6NZF1|ZC11A_MOUSE	Zc3h11a	11	1.06523	0.0145538	0.204207
sp|Q9Z1X4|ILF3_MOUSE	Ilf3	47	1.03012	0.00917484	0.168613
sp|Q61687|ATRX_MOUSE	Atrx	6	1.02539	0.116849	0.425538
sp|P97473|TRBP2_MOUSE	Tarbp2	4	1.00762	0.079353	0.372452
sp|Q8JZQ2|AFG32_MOUSE	Afg3l2	4	1.00098	0.0921627	0.397875
sp|Q7TSC1|PRC2A_MOUSE	Prrc2a	22	0.971629	0.0169606	0.209449
sp|Q91W39|NCOA5_MOUSE	Ncoa5	16	0.963584	0.0270482	0.264287
sp|Q9CPT5|NOP16_MOUSE	Nop16	5	0.935073	0.100737	0.414828
sp|Q9R226|KHDR3_MOUSE	Khdrbs3	12	0.934054	0.0245554	0.254401
sp|Q8BG81|PDIP3_MOUSE	Poldip3	22	0.92593	0.0799408	0.372969
sp|Q8VD12|Z385A_MOUSE	Znf385a	7	0.922974	0.229684	0.560159
sp|O70251|EF1B_MOUSE	Eef1b	5	0.913208	0.0585038	0.349073
sp|Q9Z130|HNRDL_MOUSE	Hnrnpdl	23	0.913031	0.0166234	0.209449
sp|Q60668|HNRPD_MOUSE	Hnrnpd	36	0.898728	0.00909953	0.168613
sp|Q7TMK9|HNRPQ_MOUSE	Syncrip	52	0.897933	0.0185042	0.209449
sp|O88532|ZFR_MOUSE	Zfr	31	0.889962	0.0283128	0.269491
sp|Q60749|KHDR1_MOUSE	Khdrbs1	20	0.8705	0.0645294	0.355164
sp|Q9CQF3|CPSF5_MOUSE	Nudt21	9	0.858031	0.0383887	0.298274
sp|Q3TLH4|PRC2C_MOUSE	Prrc2c	29	0.848752	0.0350051	0.288626
sp|Q03963|E2AK2_MOUSE	Eif2ak2	12	0.845696	0.101513	0.414828
sp|Q9CPN8|IF2B3_MOUSE	Igf2bp3	4	0.833652	0.0269198	0.264287
sp|O70133|DHX9_MOUSE	Dhx9	70	0.826227	0.016026	0.209449
sp|P29341|PABP1_MOUSE	Pabpc1	30	0.812036	0.00655703	0.13899
sp|Q8CH25|SLTM_MOUSE	Sltm	25	0.801746	0.0598615	0.349073
sp|Q8K019|BCLF1_MOUSE	Bclaf1	58	0.792405	0.0376144	0.296082
sp|P27661|H2AX_MOUSE	H2afx	5	0.781932	0.0511311	0.330722
sp|Q497V5|SRBD1_MOUSE	Srbd1	21	0.771088	0.0134282	0.200584
sp|Q921G7|ETFD_MOUSE	Etfdh	4	0.767993	0.00398905	0.11354
sp|Q569Z6|TR150_MOUSE	Thrap3	60	0.759875	0.0944542	0.404517
sp|P24788|CD11B_MOUSE	Cdk11b	5	0.759369	0.0170082	0.209449
sp|Q8CCS6|PABP2_MOUSE	Pabpn1	16	0.755786	0.00912421	0.168613
sp|P62270|RS18_MOUSE	Rps18	22	0.754056	0.0410051	0.305274
sp|Q99N93|RM16_MOUSE	Mrpl16	6	0.752137	0.0225461	0.238853
sp|O54836|ZMAT3_MOUSE	Zmat3	5	0.739484	0.0754222	0.363938
sp|O08583|THOC4_MOUSE	Alyref	12	0.732	0.00621814	0.13899
sp|Q9CZX8|RS19_MOUSE	Rps19	21	0.721387	0.00341049	0.106786
sp|D3YXK2|SAFB1_MOUSE	Safb	43	0.714827	0.0345405	0.287974
sp|Q3URQ0|TEX10_MOUSE	Tex10	5	0.711418	0.251703	0.566329
sp|Q80VD1|FA98B_MOUSE	Fam98b	14	0.698453	0.0185592	0.209449
sp|A2AAY5|SPD2B_MOUSE	Sh3pxd2b	9	0.698336	0.0403157	0.304858
sp|P84089|ERH_MOUSE	Erh	10	0.697153	0.1228	0.436008
sp|Q61655|DD19A_MOUSE	Ddx19a	5	0.669129	0.381485	0.665237
sp|Q6ZWN5|RS9_MOUSE	Rps9	26	0.667244	0.0129724	0.198675
sp|Q9CQ69|QCR8_MOUSE	Uqcrq	4	0.663047	0.253018	0.566777
sp|Q9CR67|TMM33_MOUSE	Tmem33	6	0.662396	0.249881	0.566329
sp|P35922|FMR1_MOUSE	Fmr1	28	0.655787	0.0979442	0.413184
sp|Q6PGC1|DHX29_MOUSE	Dhx29	6	0.653099	0.104265	0.414894
sp|Q9JKB3|YBOX3_MOUSE	Ybx3	7	0.627382	0.0319221	0.279368
sp|Q62446|FKBP3_MOUSE	Fkbp3	7	0.620267	0.118339	0.427025
sp|Q8BGD9|IF4B_MOUSE	Eif4b	6	0.61026	0.1667	0.505117
sp|P62960|YBOX1_MOUSE	Ybx1	22	0.608922	0.0331882	0.282134
sp|Q922R8|PDIA6_MOUSE	Pdia6	6	0.607305	0.0033381	0.106786
sp|Q91VE6|MK67I_MOUSE	Nifk	5	0.595594	0.00436293	0.115988
sp|Q9QYI4|DJB12_MOUSE	Dnajb12	6	0.595096	0.246814	0.565465
sp|Q921L3|TMCO1_MOUSE	Tmco1	4	0.582003	0.101722	0.414828
sp|Q8BG05|ROA3_MOUSE	Hnrnpa3	42	0.574362	0.0613217	0.352007
sp|P70670|NACAM_MOUSE	Naca	7	0.571657	0.00294707	0.10459
sp|P62852|RS25_MOUSE	Rps25	15	0.570164	0.103205	0.414894
sp|Q8BX10|PGAM5_MOUSE	Pgam5	10	0.566842	0.105753	0.414894
sp|Q9D7H3|RTCA_MOUSE	RtcA	13	0.563067	0.00197784	0.0898958
sp|P13011|ACOD2_MOUSE	Scd2	6	0.553165	0.510382	0.7516
sp|P83882|RL36A_MOUSE	Rpl36a	14	0.551452	0.0974508	0.412337
sp|Q8JZU2|TXTP_MOUSE	Slc25a1	8	0.547278	0.121416	0.434202
sp|Q9EQM6|DGCR8_MOUSE	Dgcr8	4	0.545431	0.0627186	0.354313
sp|Q9CX86|ROA0_MOUSE	Hnrnpa0	28	0.544306	0.00861321	0.168613
sp|Q8K363|DDX18_MOUSE	Ddx18	12	0.542371	0.10382	0.414894
sp|Q8CGZ0|CHERP_MOUSE	Cherp	4	0.542009	0.053109	0.334065
sp|Q8VHK9|DHX36_MOUSE	Dhx36	17	0.540686	0.00824346	0.168334
sp|P62862|RS30_MOUSE	Fau	6	0.535967	0.0355938	0.288626
sp|P84099|RL19_MOUSE	Rpl19	16	0.535223	0.097211	0.412337
sp|Q5F2E8|TAOK1_MOUSE	Taok1	6	0.535208	0.0153296	0.207687
sp|Q3V3R1|C1TM_MOUSE	Mthfd1l	14	0.533809	0.00995504	0.177553
sp|Q99P72|RTN4_MOUSE	Rtn4	5	0.532904	0.221012	0.559571
sp|O88569|ROA2_MOUSE	Hnrnpa2b1	44	0.524837	0.13978	0.464504
sp|P97868|RBBP6_MOUSE	Rbbp6	6	0.522607	0.00587357	0.137931
sp|Q99ME9|NOG1_MOUSE	Gtpbp4	12	0.520283	0.0743631	0.363938
sp|Q3TJZ6|FA98A_MOUSE	Fam98a	7	0.518707	0.0250102	0.255358
sp|P28352|APEX1_MOUSE	Apex1	13	0.51666	0.0118435	0.185416
sp|P24547|IMDH2_MOUSE	Impdh2	7	0.506752	0.054085	0.338692
sp|Q9Z110|P5CS_MOUSE	Aldh18a1	6	0.503602	0.0617074	0.352007
sp|P49312|ROA1_MOUSE	Hnrnpa1	41	0.502367	0.0416823	0.305996
sp|Q9DB20|ATPO_MOUSE	Atp5o	16	0.484952	0.0114426	0.185416
sp|Q9Z277|BAZ1B_MOUSE	Baz1b	5	0.483321	0.00954603	0.172441
sp|O55126|NIPS2_MOUSE	Gbas	6	0.478636	0.0570882	0.3469
sp|Q9D710|TMX2_MOUSE	Tmx2	7	0.466621	0.0132644	0.200584
sp|Q6NVF9|CPSF6_MOUSE	Cpsf6	5	0.466226	0.075833	0.364671
sp|E9Q784|ZC3HD_MOUSE	Zc3h13	10	0.46563	0.0404603	0.304858
sp|Q3TFD2|PCAT1_MOUSE	Lpcat1	7	0.461874	0.0359708	0.288774
sp|Q8BJ05|ZC3HE_MOUSE	Zc3h14	9	0.459677	0.274546	0.584185
sp|Q9CYI4|LUC7L_MOUSE	Luc7l	9	0.457811	0.0511693	0.330722
sp|P62702|RS4X_MOUSE	Rps4x	36	0.457771	0.0456184	0.319838
sp|P20060|HEXB_MOUSE	Hexb	6	0.456756	0.198319	0.540157
sp|P63325|RS10_MOUSE	Rps10	25	0.455774	0.0848192	0.385807
sp|Q61164|CTCF_MOUSE	Ctcf	15	0.45195	0.0416971	0.305996
sp|Q3UUQ7|PGAP1_MOUSE	Pgap1	7	0.447753	0.212141	0.559571
sp|P97461|RS5_MOUSE	Rps5	16	0.44294	0.0282907	0.269491
sp|Q9Z321|TOP3B_MOUSE	Top3b	14	0.436736	0.0301909	0.274445
sp|Q9D0B0|SRSF9_MOUSE	Srsf9	12	0.433645	0.0177539	0.209449
sp|Q9Z108|STAU1_MOUSE	Stau1	20	0.433065	0.110858	0.419947
sp|P62281|RS11_MOUSE	Rps11	24	0.432446	0.123831	0.436519
sp|Q5SUF2|LC7L3_MOUSE	Luc7l3	14	0.431507	0.328202	0.623239
sp|P62315|SMD1_MOUSE	Snrpd1	5	0.427167	0.0148408	0.205007
sp|P61620|S61A1_MOUSE	Sec61a1	8	0.426505	0.123159	0.436008
sp|P28652|KCC2B_MOUSE	Camk2b	14	0.423981	0.212059	0.559571
sp|Q923D5|WBP11_MOUSE	Wbp11	5	0.421597	0.0462748	0.319838
sp|Q80YR5|SAFB2_MOUSE	Safb2	15	0.41972	0.0387008	0.298274
sp|Q9DCX2|ATP5H_MOUSE	Atp5h	10	0.418942	0.0681837	0.359818
sp|Q9CY57|CHTOP_MOUSE	Chtop	9	0.41732	0.0480664	0.320485
sp|P26443|DHE3_MOUSE	Glud1	29	0.417268	0.0260993	0.262671
sp|Q9D7S7|RL22L_MOUSE	Rpl22l1	5	0.41701	0.0284984	0.269491
sp|Q3UVK0|ERMP1_MOUSE	Ermp1	8	0.416722	0.0145074	0.204207
sp|Q8BIF9|ZN787_MOUSE	Znf787	4	0.415133	0.292921	0.601641
sp|Q07235|GDN_MOUSE	Serpine2	16	0.414747	0.063141	0.354313
sp|Q8K1N4|SPAS2_MOUSE	Spats2	8	0.409221	0.0691113	0.359818
sp|Q03141|MARK3_MOUSE	Mark3	22	0.406973	0.0421068	0.307402
sp|Q91W18|TDRD3_MOUSE	Tdrd3	16	0.406275	0.127651	0.442294
sp|P19536|COX5B_MOUSE	Cox5b	6	0.399933	0.0902614	0.394964
sp|Q8CCK0|H2AW_MOUSE	H2afy2	6	0.397225	0.565378	0.776218
sp|P54823|DDX6_MOUSE	Ddx6	8	0.395374	0.248004	0.566201
sp|Q9CQ75|NDUA2_MOUSE	Ndufa2	4	0.394793	0.193055	0.532582
sp|O08756|HCD2_MOUSE	Hsd17b10	10	0.393083	0.400589	0.674084
sp|Q8BJ71|NUP93_MOUSE	Nup93	4	0.392994	0.0750935	0.363938
sp|P62996|TRA2B_MOUSE	Tra2b	26	0.392684	0.0190694	0.209449
sp|Q9DAW6|PRP4_MOUSE	Prpf4	7	0.392331	0.086039	0.388383
sp|Q6ZPZ3|ZC3H4_MOUSE	Zc3h4	6	0.389599	0.115405	0.424559
sp|Q8CG48|SMC2_MOUSE	Smc2	13	0.388961	0.177892	0.51642
sp|Q9DC16|ERGI1_MOUSE	Ergic1	4	0.3878	0.267037	0.581652
sp|Q91W43|GCSP_MOUSE	Gldc	4	0.386784	0.165878	0.50371
sp|Q9CPQ8|ATP5L_MOUSE	Atp5l	4	0.38487	0.0337893	0.283388
sp|P30999|CTND1_MOUSE	Ctnnd1	11	0.381284	0.068938	0.359818
sp|Q99J62|RFC4_MOUSE	Rfc4	5	0.380071	0.0476084	0.319838
sp|Q8CFI7|RPB2_MOUSE	Polr2b	8	0.378677	0.0188596	0.209449
sp|Q8K2F8|LS14A_MOUSE	Lsm14a	9	0.37826	0.084625	0.385807
sp|P60824|CIRBP_MOUSE	Cirbp	9	0.376957	0.0660941	0.356807
sp|Q9ERU9|RBP2_MOUSE	Ranbp2	7	0.375625	0.53823	0.765604
sp|Q6ZWY9|H2B1C_MOUSE	Hist1h2bc	12	0.375026	0.0387396	0.298274
sp|Q91Z49|UIF_MOUSE	Fyttd1	14	0.373184	0.0815658	0.378047
sp|Q8K0Q5|RHG18_MOUSE	Arhgap18	4	0.372724	0.920088	0.969637
sp|Q9WVR4|FXR2_MOUSE	Fxr2	15	0.37002	0.163359	0.502924
sp|P08775|RPB1_MOUSE	Polr2a	18	0.369909	0.418626	0.686664
sp|Q9DC69|NDUA9_MOUSE	Ndufa9	12	0.368887	0.0180636	0.209449
sp|Q8R404|MIC13_MOUSE	Mic13	5	0.368125	0.835263	0.934779
sp|Q9D2G2|ODO2_MOUSE	Dlst	9	0.36344	0.0283407	0.269491
sp|Q9CS84|NRX1A_MOUSE	Nrxn1	7	0.362069	0.415825	0.684273
sp|Q62425|NDUA4_MOUSE	Ndufa4	7	0.361874	0.0917082	0.39759
sp|O54879|HMGB3_MOUSE	Hmgb3	6	0.360058	0.0595512	0.349073
sp|Q64213|SF01_MOUSE	Sf1	17	0.359008	0.0300357	0.274445
sp|Q06185|ATP5I_MOUSE	Atp5i	5	0.353448	0.0496916	0.324146
sp|Q9D1I6|RM14_MOUSE	Mrpl14	4	0.351029	0.0452629	0.319838
sp|Q99NH0|ANR17_MOUSE	Ankrd17	5	0.347726	0.455024	0.721992
sp|P62082|RS7_MOUSE	Rps7	25	0.344216	0.172645	0.507416
sp|Q60597|ODO1_MOUSE	Ogdh	17	0.344072	0.0117927	0.185416
sp|Q8VEK3|HNRPU_MOUSE	Hnrnpu	65	0.343784	0.0561344	0.343884
sp|P47857|PFKAM_MOUSE	Pfkm	12	0.341695	0.0667348	0.357526
sp|P16330|CN37_MOUSE	Cnp	5	0.337043	0.048448	0.320485
sp|P25444|RS2_MOUSE	Rps2	21	0.336434	0.107336	0.416628
sp|Q8BGT5|ALAT2_MOUSE	Gpt2	4	0.336307	0.0616619	0.352007
sp|P46978|STT3A_MOUSE	Stt3a	11	0.332792	0.300047	0.60258
sp|Q9ER88|RT29_MOUSE	Dap3	4	0.332785	0.267915	0.581652
sp|Q99LF4|RTCB_MOUSE	Rtcb	23	0.329486	0.173942	0.508473
sp|Q91W92|BORG5_MOUSE	Cdc42ep1	4	0.328572	0.278565	0.584944
sp|Q8BMS1|ECHA_MOUSE	Hadha	54	0.327801	0.0305168	0.274858
sp|Q9CPQ1|COX6C_MOUSE	Cox6c	4	0.325962	0.0191402	0.209449
sp|P62317|SMD2_MOUSE	Snrpd2	12	0.323398	0.22775	0.560159
sp|Q9CQQ7|AT5F1_MOUSE	Atp5f1	11	0.322035	0.178249	0.51642
sp|Q8VIJ6|SFPQ_MOUSE	Sfpq	53	0.322	0.199736	0.540157
sp|Q9CQL1|MGN2_MOUSE	Magohb	5	0.318842	0.0468216	0.319838
sp|P62843|RS15_MOUSE	Rps15	9	0.311846	0.0410087	0.305274
sp|P97822|AN32E_MOUSE	Anp32e	4	0.31161	0.338263	0.628946
sp|E9Q5K9|YTDC1_MOUSE	Ythdc1	10	0.305403	0.0923387	0.397875
sp|Q8VDM6|HNRL1_MOUSE	Hnrnpul1	25	0.304128	0.125243	0.438517
sp|Q9JLI8|SART3_MOUSE	Sart3	26	0.303538	0.134591	0.455862
sp|P67984|RL22_MOUSE	Rpl22	10	0.303038	0.0844661	0.385807
sp|P43247|MSH2_MOUSE	Msh2	5	0.302917	0.543219	0.767177
sp|P48962|ADT1_MOUSE	Slc25a4	16	0.30216	0.109337	0.417494
sp|P57776|EF1D_MOUSE	Eef1d	10	0.301581	0.052221	0.332939
sp|Q925I1|ATAD3_MOUSE	Atad3	13	0.299703	0.802827	0.923415
sp|Q9JIK5|DDX21_MOUSE	Ddx21	52	0.298708	0.0681144	0.359818
sp|Q9DC71|RT15_MOUSE	Mrps15	4	0.298668	0.288014	0.595032
sp|Q2TPA8|HSDL2_MOUSE	Hsdl2	6	0.2979	0.365516	0.655913
sp|Q6PAQ4|REXO4_MOUSE	Rexo4	4	0.297179	0.0692056	0.359818
sp|P61255|RL26_MOUSE	Rpl26	21	0.293821	0.271269	0.584061
sp|Q6PFR5|TRA2A_MOUSE	Tra2a	9	0.292639	0.297015	0.60258
sp|Q64133|AOFA_MOUSE	Maoa	14	0.288295	0.0394972	0.302454
sp|Q9R0Q3|TMED2_MOUSE	Tmed2	4	0.286024	0.161809	0.501074
sp|O55022|PGRC1_MOUSE	Pgrmc1	6	0.285582	0.0587139	0.349073
sp|P20357|MTAP2_MOUSE	Map2	38	0.281441	0.217965	0.559571
sp|O88455|DHCR7_MOUSE	Dhcr7	5	0.281392	0.244799	0.565457
sp|Q61464|ZN638_MOUSE	Znf638	9	0.281212	0.226357	0.560159
sp|Q6NZN0|RBM26_MOUSE	Rbm26	6	0.280001	0.33184	0.625124
sp|O08663|MAP2_MOUSE	Metap2	5	0.279388	0.471033	0.72631
sp|P17141|ZFP37_MOUSE	Zfp37	11	0.278252	0.109335	0.417494
sp|Q8R081|HNRPL_MOUSE	Hnrnpl	49	0.277705	0.0768127	0.365639
sp|Q91VR5|DDX1_MOUSE	Ddx1	37	0.276826	0.070004	0.361235
sp|Q9JLM8|DCLK1_MOUSE	Dclk1	6	0.276627	0.344158	0.635419
sp|O35691|PININ_MOUSE	Pnn	13	0.274952	0.516498	0.754141
sp|P10126|EF1A1_MOUSE	Eef1a1	37	0.2739	0.043812	0.314955
sp|Q99JX7|NXF1_MOUSE	Nxf1	22	0.272682	0.20082	0.540157
sp|Q07646|MEST_MOUSE	Mest	10	0.270301	0.136652	0.458434
sp|Q91VD9|NDUS1_MOUSE	Ndufs1	29	0.270157	0.189827	0.531665
sp|Q922P9|GLYR1_MOUSE	Glyr1	23	0.267838	0.393159	0.671255
sp|O55128|SAP18_MOUSE	Sap18	9	0.265641	0.147265	0.46839
sp|Q9CR62|M2OM_MOUSE	Slc25a11	9	0.265593	0.465295	0.723325
sp|Q64152|BTF3_MOUSE	Btf3	7	0.26495	0.232688	0.560159
sp|Q9R0H0|ACOX1_MOUSE	Acox1	17	0.263549	0.10366	0.414894
sp|Q8VCM8|NCLN_MOUSE	Ncln	15	0.260693	0.241393	0.565457
sp|P18608|HMGN1_MOUSE	Hmgn1	9	0.256843	0.198849	0.540157
sp|Q921H8|THIKA_MOUSE	Acaa1a	5	0.256736	0.619879	0.821539
sp|Q6GQT9|NOMO1_MOUSE	Nomo1	30	0.256343	0.455757	0.722212
sp|O35326|SRSF5_MOUSE	Srsf5	14	0.255976	0.100539	0.414828
sp|Q8VEE4|RFA1_MOUSE	Rpa1	5	0.255354	0.786518	0.911351
sp|Q8CGC6|RBM28_MOUSE	Rbm28	4	0.254369	0.531001	0.760265
sp|A2AJI0|MA7D1_MOUSE	Map7d1	15	0.253729	0.186716	0.530408
sp|P03975|IGEB_MOUSE	Iap	7	0.252691	0.610757	0.811846
sp|Q9D6Z1|NOP56_MOUSE	Nop56	20	0.251753	0.0874108	0.39099
sp|O35129|PHB2_MOUSE	Phb2	18	0.251295	0.0775915	0.366867
sp|P80316|TCPE_MOUSE	Cct5	16	0.249158	0.231221	0.560159
sp|Q99LY9|NDUS5_MOUSE	Ndufs5	4	0.248707	0.313262	0.608892
sp|Q8BK67|RCC2_MOUSE	Rcc2	9	0.248691	0.0877158	0.391112
sp|Q6P5F9|XPO1_MOUSE	Xpo1	9	0.247921	0.900992	0.966086
sp|Q04750|TOP1_MOUSE	Top1	28	0.247396	0.61051	0.811846
sp|Q7TMF2|ERI1_MOUSE	Eri1	6	0.247352	0.188366	0.531665
sp|P62806|H4_MOUSE	Hist1h4a	14	0.246533	0.0710504	0.361235
sp|P35700|PRDX1_MOUSE	Prdx1	7	0.244306	0.171895	0.507416
sp|Q9JM63|KCJ10_MOUSE	Kcnj10	4	0.242703	0.248341	0.566201
sp|Q4FK66|PR38A_MOUSE	Prpf38a	5	0.242288	0.416952	0.684715
sp|Q6ZQ58|LARP1_MOUSE	Larp1	4	0.241565	0.200201	0.540157
sp|Q99PU8|DHX30_MOUSE	Dhx30	15	0.24052	0.620281	0.821539
sp|Q80TV8|CLAP1_MOUSE	Clasp1	14	0.240432	0.303608	0.607648
sp|P70333|HNRH2_MOUSE	Hnrnph2	7	0.238591	0.245284	0.565457
sp|Q6PGN3|DCLK2_MOUSE	Dclk2	24	0.238175	0.232474	0.560159
sp|Q8K224|NAT10_MOUSE	Nat10	6	0.238159	0.566194	0.776218
sp|Q8BMJ3|IF1AX_MOUSE	Eif1ax	4	0.236836	0.0740875	0.363938
sp|P26043|RADI_MOUSE	Rdx	18	0.235734	0.101709	0.414828
sp|Q921F2|TADBP_MOUSE	Tardbp	14	0.235271	0.142066	0.467689
sp|Q9CZU6|CISY_MOUSE	Cs	21	0.234128	0.124906	0.438517
sp|Q7TQH0|ATX2L_MOUSE	Atxn2l	4	0.231637	0.271661	0.584061
sp|P12787|COX5A_MOUSE	Cox5a	6	0.230936	0.233128	0.560159
sp|P80317|TCPZ_MOUSE	Cct6a	17	0.229471	0.260504	0.574778
sp|Q9WTX2|PRKRA_MOUSE	Prkra	12	0.229462	0.50649	0.74884
sp|Q8BU14|SEC62_MOUSE	Sec62	10	0.228734	0.135387	0.456363
sp|Q62093|SRSF2_MOUSE	Srsf2	10	0.227432	0.0708707	0.361235
sp|P60867|RS20_MOUSE	Rps20	9	0.227333	0.531271	0.760265
sp|P62849|RS24_MOUSE	Rps24	9	0.226654	0.309614	0.608459
sp|O09118|NET1_MOUSE	Ntn1	9	0.225581	0.818208	0.927844
sp|P19783|COX41_MOUSE	Cox4i1	8	0.222773	0.102369	0.414894
sp|Q925N0|SFXN5_MOUSE	Sfxn5	14	0.2226	0.471148	0.72631
sp|P35550|FBRL_MOUSE	Fbl	18	0.222496	0.0971302	0.412337
sp|Q9Z0U1|ZO2_MOUSE	Tjp2	8	0.222182	0.576002	0.784901
sp|P56391|CX6B1_MOUSE	Cox6b1	6	0.221444	0.682259	0.848343
sp|Q99KI0|ACON_MOUSE	Aco2	17	0.220365	0.105547	0.414894
sp|O08547|SC22B_MOUSE	Sec22b	15	0.218424	0.206064	0.550937
sp|Q9CQZ5|NDUA6_MOUSE	Ndufa6	4	0.218241	0.891596	0.962651
sp|Q9JIF0|ANM1_MOUSE	Prmt1	5	0.215298	0.0626621	0.354313
sp|Q9JIX8|ACINU_MOUSE	Acin1	15	0.215262	0.0851568	0.385807
sp|P21619|LMNB2_MOUSE	Lmnb2	4	0.213601	0.512738	0.7516
sp|Q9QYR6|MAP1A_MOUSE	Map1a	26	0.212798	0.31864	0.615019
sp|Q9R0U0|SRS10_MOUSE	Srsf10	18	0.212506	0.0764128	0.365639
sp|P62900|RL31_MOUSE	Rpl31	11	0.211966	0.517643	0.754177
sp|Q7TT37|ELP1_MOUSE	Ikbkap	6	0.209722	0.138352	0.461939
sp|Q61335|BAP31_MOUSE	Bcap31	13	0.209449	0.391527	0.671255
sp|Q78PY7|SND1_MOUSE	Snd1	42	0.209423	0.0848942	0.385807
sp|Q3UMU9|HDGR2_MOUSE	Hdgfrp2	9	0.207529	0.12776	0.442294
sp|O54734|OST48_MOUSE	Ddost	14	0.207062	0.227862	0.560159
sp|Q61543|GSLG1_MOUSE	Glg1	15	0.201272	0.486261	0.737366
sp|Q80SY5|PR38B_MOUSE	Prpf38b	4	0.20094	0.382257	0.66576
sp|Q6PHZ5|RB15B_MOUSE	Rbm15b	12	0.200579	0.105384	0.414894
sp|P48678|LMNA_MOUSE	Lmna	9	0.200364	0.190554	0.531665
sp|Q9CPP6|NDUA5_MOUSE	Ndufa5	5	0.199964	0.150256	0.474687
sp|Q8CGK3|LONM_MOUSE	Lonp1	5	0.199822	0.686904	0.848989
sp|Q922Q8|LRC59_MOUSE	Lrrc59	20	0.199199	0.260596	0.574778
sp|Q8BRF7|SCFD1_MOUSE	Scfd1	5	0.198171	0.817523	0.927844
sp|Q7TPV4|MBB1A_MOUSE	Mybbp1a	54	0.194438	0.290479	0.598675
sp|Q8K273|MMGT1_MOUSE	Mmgt1	5	0.1935	0.182415	0.521345
sp|P53026|RL10A_MOUSE	Rpl10a	17	0.189629	0.365896	0.655913
sp|O70503|DHB12_MOUSE	Hsd17b12	21	0.188746	0.0753932	0.363938
sp|Q9QY76|VAPB_MOUSE	Vapb	8	0.186265	0.128443	0.443569
sp|O88291|ZN326_MOUSE	Znf326	17	0.185887	0.21859	0.559571
sp|Q6A0A9|F120A_MOUSE	FAM120A	38	0.185814	0.40427	0.675701
sp|Q9CQY5|MAGT1_MOUSE	Magt1	6	0.185715	0.781681	0.908251
sp|P62320|SMD3_MOUSE	Snrpd3	7	0.184409	0.259686	0.574778
sp|Q8R1M2|H2AJ_MOUSE	H2afj	9	0.184169	0.146156	0.46839
sp|Q924C1|XPO5_MOUSE	Xpo5	4	0.179587	0.158753	0.494873
sp|Q9D855|QCR7_MOUSE	Uqcrb	7	0.178136	0.601998	0.806288
sp|P27048|RSMB_MOUSE	Snrpb	7	0.177876	0.756498	0.897983
sp|Q61656|DDX5_MOUSE	Ddx5	50	0.176408	0.320591	0.617938
sp|O70310|NMT1_MOUSE	Nmt1	8	0.175472	0.706741	0.860673
sp|Q922Q4|P5CR2_MOUSE	Pycr2	9	0.175086	0.213344	0.559571
sp|P62301|RS13_MOUSE	Rps13	11	0.174446	0.39494	0.671255
sp|Q80Y17|L2GL1_MOUSE	Llgl1	9	0.174116	0.251547	0.566329
sp|Q9D4J7|PHF6_MOUSE	Phf6	13	0.173887	0.165743	0.50371
sp|P17426|AP2A1_MOUSE	Ap2a1	14	0.173529	0.132646	0.452537
sp|Q8BWT1|THIM_MOUSE	Acaa2	8	0.172807	0.324455	0.621982
sp|Q9CXW4|RL11_MOUSE	Rpl11	13	0.17187	0.144679	0.46839
sp|P32233|DRG1_MOUSE	Drg1	13	0.171777	0.551178	0.769554
sp|P62827|RAN_MOUSE	Ran	17	0.171659	0.943409	0.98078
sp|Q9DCJ5|NDUA8_MOUSE	Ndufa8	8	0.1712	0.458449	0.722212
sp|Q9DBZ1|IKIP_MOUSE	Ikbip	8	0.16712	0.464246	0.723325
sp|Q9WUM4|COR1C_MOUSE	Coro1c	5	0.1664	0.245812	0.565457
sp|Q9JKN5|OLIG1_MOUSE	Olig1	7	0.166285	0.575281	0.784677
sp|P62245|RS15A_MOUSE	Rps15a	16	0.165806	0.341253	0.631004
sp|Q8C0C7|SYFA_MOUSE	Farsa	8	0.164782	0.219189	0.559571
sp|Q6ZQI3|MLEC_MOUSE	Mlec	13	0.164721	0.312029	0.608459
sp|Q91WJ7|SPS2L_MOUSE	Spats2l	6	0.16424	0.209875	0.557951
sp|Q9QX47|SON_MOUSE	Son	8	0.164073	0.525346	0.757638
sp|Q9DBR1|XRN2_MOUSE	Xrn2	16	0.162639	0.650196	0.834359
sp|Q62095|DDX3Y_MOUSE	Ddx3y	5	0.161223	0.590286	0.795897
sp|Q91YE6|IPO9_MOUSE	Ipo9	4	0.159799	0.236145	0.562104
sp|P47758|SRPRB_MOUSE	Srprb	6	0.159559	0.38416	0.668249
sp|P51150|RAB7A_MOUSE	Rab7a	7	0.159036	0.462881	0.723325
sp|Q9CZX9|EMC4_MOUSE	Emc4	6	0.156831	0.299957	0.60258
sp|Q8C3F2|F120C_MOUSE	Fam120c	35	0.156241	0.495145	0.740825
sp|Q920Q6|MSI2H_MOUSE	Msi2	15	0.155583	0.489546	0.737366
sp|Q91YQ5|RPN1_MOUSE	Rpn1	40	0.155377	0.299852	0.60258
sp|P80313|TCPH_MOUSE	Cct7	12	0.155162	0.297589	0.60258
sp|P63037|DNJA1_MOUSE	Dnaja1	5	0.154622	0.365435	0.655913
sp|Q8VHE0|SEC63_MOUSE	Sec63	18	0.153539	0.524507	0.757638
sp|Q9EST5|AN32B_MOUSE	Anp32b	7	0.153149	0.995127	0.998278
sp|Q6URW6|MYH14_MOUSE	Myh14	5	0.152924	0.988956	0.998278
sp|Q9Z1P6|NDUA7_MOUSE	Ndufa7	8	0.152426	0.157278	0.492456
sp|P26516|PSMD7_MOUSE	Psmd7	5	0.151854	0.58951	0.795884
sp|Q99KF1|TMED9_MOUSE	Tmed9	7	0.151654	0.407978	0.678679
sp|Q99LC5|ETFA_MOUSE	Etfa	7	0.147973	0.461667	0.723325
sp|Q91ZW3|SMCA5_MOUSE	Smarca5	43	0.147235	0.788231	0.911837
sp|Q9D8N0|EF1G_MOUSE	Eef1g	13	0.146673	0.223412	0.559571
sp|P62889|RL30_MOUSE	Rpl30	11	0.145778	0.136398	0.458434
sp|Q9DBG3|AP2B1_MOUSE	Ap2b1	16	0.145462	0.247821	0.566201
sp|P60229|EIF3E_MOUSE	Eif3e	7	0.143941	0.978315	0.995552
sp|Q9CZ13|QCR1_MOUSE	Uqcrc1	18	0.143802	0.110256	0.419868
sp|Q9D051|ODPB_MOUSE	Pdhb	11	0.141289	0.213704	0.559571
sp|Q91VC3|IF4A3_MOUSE	Eif4a3	23	0.140764	0.250218	0.566329
sp|Q61584|FXR1_MOUSE	Fxr1	34	0.140671	0.339003	0.628946
sp|Q80W00|PP1RA_MOUSE	Ppp1r10	6	0.138902	0.391195	0.671255
sp|O35295|PURB_MOUSE	Purb	15	0.137621	0.47471	0.727819
sp|A2APV2|FMNL2_MOUSE	Fmnl2	9	0.135796	0.234559	0.560159
sp|Q99LR1|ABD12_MOUSE	Abhd12	12	0.134574	0.588788	0.795884
sp|Q9CQT2|RBM7_MOUSE	Rbm7	4	0.132553	0.329007	0.623239
sp|Q9Z0R9|FADS2_MOUSE	Fads2	18	0.129451	0.296543	0.60258
sp|Q99MJ9|DDX50_MOUSE	Ddx50	18	0.129007	0.504103	0.746878
sp|Q9QXS1|PLEC_MOUSE	Plec	4	0.128987	0.367671	0.656136
sp|Q8VCC9|SPON1_MOUSE	Spon1	18	0.125582	0.392844	0.671255
sp|Q8BTI8|SRRM2_MOUSE	Srrm2	31	0.124949	0.317755	0.614153
sp|Q9Z2I9|SUCB1_MOUSE	Sucla2	10	0.12341	0.327878	0.623239
sp|Q8BH95|ECHM_MOUSE	Echs1	4	0.122118	0.707477	0.860824
sp|Q8BNJ2|ATS4_MOUSE	Adamts4	4	0.118413	0.37567	0.661261
sp|Q80WV3|CHST2_MOUSE	Chst2	11	0.117948	0.491254	0.737929
sp|Q8VBZ3|CLPT1_MOUSE	Clptm1	7	0.11769	0.144302	0.46839
sp|Q9CRD2|EMC2_MOUSE	Emc2	14	0.117224	0.874071	0.957671
sp|O54774|AP3D1_MOUSE	Ap3d1	5	0.115658	0.634606	0.829782
sp|Q9R099|TBL2_MOUSE	Tbl2	10	0.114755	0.646594	0.832211
sp|Q9D0M3|CY1_MOUSE	Cyc1	8	0.113952	0.388615	0.671028
sp|O35286|DHX15_MOUSE	Dhx15	34	0.113521	0.56628	0.776218
sp|Q8BMK4|CKAP4_MOUSE	Ckap4	41	0.108886	0.222571	0.559571
sp|Q3U0V1|FUBP2_MOUSE	Khsrp	36	0.108183	0.76083	0.901606
sp|P53395|ODB2_MOUSE	Dbt	4	0.107908	0.193529	0.532582
sp|Q8C181|MBNL2_MOUSE	Mbnl2	5	0.107303	0.815268	0.927844
sp|Q9CQA3|SDHB_MOUSE	Sdhb	13	0.107193	0.754763	0.896679
sp|Q3UKJ7|SMU1_MOUSE	Smu1	5	0.106647	0.872146	0.956307
sp|Q6ZWX6|IF2A_MOUSE	Eif2s1	23	0.106581	0.401869	0.674088
sp|Q9DCE5|PK1IP_MOUSE	Pak1ip1	9	0.104328	0.682132	0.848343
sp|Q61881|MCM7_MOUSE	Mcm7	19	0.103758	0.231282	0.560159
sp|Q8BFQ4|WDR82_MOUSE	Wdr82	4	0.103603	0.407613	0.678679
sp|Q9R0N3|SYT11_MOUSE	Syt11	5	0.103583	0.231571	0.560159
sp|O70378|EMC8_MOUSE	Emc8	8	0.103266	0.406257	0.677416
sp|P62141|PP1B_MOUSE	Ppp1cb	15	0.102728	0.282825	0.590371
sp|Q5XG73|ACBD5_MOUSE	Acbd5	6	0.102559	0.729661	0.878134
sp|Q9D024|CCD47_MOUSE	Ccdc47	19	0.100442	0.242279	0.565457
sp|P62264|RS14_MOUSE	Rps14	10	0.100402	0.817752	0.927844
sp|P80315|TCPD_MOUSE	Cct4	22	0.0975817	0.17358	0.508471
sp|Q8BI72|CARF_MOUSE	Cdkn2aip	7	0.0972789	0.372	0.659272
sp|Q9CQ62|DECR_MOUSE	Decr1	8	0.0970952	0.781015	0.908251
sp|Q8BP47|SYNC_MOUSE	Nars	11	0.0967656	0.847676	0.939519
sp|Q8VDN2|AT1A1_MOUSE	Atp1a1	4	0.0958379	0.345914	0.636283
sp|Q9D0D3|PAPD1_MOUSE	Mtpap	4	0.0957374	0.369977	0.657986
sp|Q08943|SSRP1_MOUSE	Ssrp1	4	0.095678	0.362563	0.6546
sp|Q52KI8|SRRM1_MOUSE	Srrm1	13	0.0956439	0.228275	0.560159
sp|Q08288|LYAR_MOUSE	Lyar	15	0.0948649	0.287362	0.595032
sp|P32067|LA_MOUSE	Ssb	15	0.0942844	0.270657	0.584061
sp|P47955|RLA1_MOUSE	Rplp1	4	0.0942635	0.817341	0.927844
sp|Q8CH18|CCAR1_MOUSE	Ccar1	15	0.0932028	0.579174	0.788419
sp|Q6DFW4|NOP58_MOUSE	Nop58	19	0.0924111	0.806067	0.924293
sp|Q9CY66|GAR1_MOUSE	Gar1	6	0.0921022	0.338233	0.628946
sp|O09106|HDAC1_MOUSE	Hdac1	6	0.0897648	0.41563	0.684273
sp|Q8K1M6|DNM1L_MOUSE	Dnm1l	7	0.089292	0.945865	0.98211
sp|P53994|RAB2A_MOUSE	Rab2a	4	0.0890473	0.229333	0.560159
sp|Q1HFZ0|NSUN2_MOUSE	Nsun2	18	0.0870236	0.684831	0.848343
sp|Q6NS46|RRP5_MOUSE	Pdcd11	10	0.0869074	0.727291	0.876607
sp|Q60931|VDAC3_MOUSE	Vdac3	14	0.0860494	0.7588	0.899957
sp|P16858|G3P_MOUSE	Gapdh	26	0.0858273	0.489833	0.737366
sp|Q99K48|NONO_MOUSE	Nono	45	0.0844592	0.555326	0.770892
sp|P97310|MCM2_MOUSE	Mcm2	14	0.0843252	0.552646	0.770207
sp|Q62167|DDX3X_MOUSE	Ddx3x	36	0.0842987	0.397075	0.671962
sp|P61161|ARP2_MOUSE	Actr2	5	0.0828692	0.927212	0.9735
sp|Q62186|SSRD_MOUSE	Ssr4	7	0.0826055	0.370321	0.657986
sp|Q91WQ3|SYYC_MOUSE	Yars	16	0.0816402	0.662339	0.837734
sp|Q9EPE9|AT131_MOUSE	Atp13a1	16	0.0814587	0.844583	0.937535
sp|Q8BVY0|RL1D1_MOUSE	Rsl1d1	23	0.0806932	0.386557	0.669114
sp|P63001|RAC1_MOUSE	Rac1	5	0.0804884	0.830186	0.933522
sp|P39749|FEN1_MOUSE	Fen1	8	0.0801886	0.719112	0.869725
sp|P51660|DHB4_MOUSE	Hsd17b4	26	0.0792888	0.416197	0.684273
sp|P10922|H10_MOUSE	H1f0	9	0.0792202	0.549865	0.769554
sp|P62751|RL23A_MOUSE	Rpl23a	18	0.0783262	0.579704	0.788419
sp|Q9D0I8|MRT4_MOUSE	Mrto4	4	0.0773049	0.977635	0.995552
sp|Q640R3|HECAM_MOUSE	Hepacam	6	0.0761325	0.596593	0.799809
sp|P97450|ATP5J_MOUSE	Atp5j	5	0.0747859	0.308404	0.608459
sp|Q8QZY1|EIF3L_MOUSE	Eif3l	8	0.0747746	0.632864	0.829782
sp|Q60972|RBBP4_MOUSE	Rbbp4	5	0.0745835	0.500561	0.743977
sp|Q921T2|TOIP1_MOUSE	Tor1aip1	7	0.0733136	0.251574	0.566329
sp|Q8K2B3|SDHA_MOUSE	Sdha	21	0.0729718	0.912824	0.967044
sp|Q9QYJ0|DNJA2_MOUSE	Dnaja2	7	0.0722831	0.313737	0.608892
sp|Q8BMA6|SRP68_MOUSE	Srp68	13	0.0687902	0.989929	0.998278
sp|Q7TNV0|DEK_MOUSE	Dek	9	0.0680449	0.395779	0.671871
sp|P62918|RL8_MOUSE	Rpl8	20	0.0674041	0.883162	0.957949
sp|Q8BSQ9|PB1_MOUSE	Pbrm1	5	0.0667101	0.278117	0.584944
sp|Q9JKF1|IQGA1_MOUSE	Iqgap1	11	0.0659117	0.372449	0.659272
sp|Q99LC3|NDUAA_MOUSE	Ndufa10	6	0.0657856	0.359924	0.651842
sp|P62835|RAP1A_MOUSE	Rap1a	4	0.0651823	0.503729	0.746878
sp|P51410|RL9_MOUSE	Rpl9	15	0.0633437	0.233649	0.560159
sp|Q6PIE5|AT1A2_MOUSE	Atp1a2	47	0.0628279	0.498315	0.74299
sp|Q64521|GPDM_MOUSE	Gpd2	17	0.0625697	0.375754	0.661261
sp|Q80U58|PUM2_MOUSE	Pum2	6	0.0612037	0.941498	0.98078
sp|Q9DCW4|ETFB_MOUSE	Etfb	4	0.0598507	0.54023	0.766332
sp|Q9CYN2|SPCS2_MOUSE	Spcs2	8	0.0582443	0.278478	0.584944
sp|P37040|NCPR_MOUSE	Por	16	0.0577633	0.93088	0.9759
sp|Q8CGF7|TCRG1_MOUSE	Tcerg1	5	0.0562548	0.901634	0.966086
sp|Q6P542|ABCF1_MOUSE	Abcf1	13	0.0554398	0.823399	0.929705
sp|P16254|SRP14_MOUSE	Srp14	5	0.0549686	0.22339	0.559571
sp|P30681|HMGB2_MOUSE	Hmgb2	18	0.0546507	0.495811	0.740825
sp|Q9WUR2|ECI2_MOUSE	Eci2	4	0.0535883	0.712423	0.866095
sp|Q61474|MSI1H_MOUSE	Msi1	8	0.0533247	0.761654	0.901824
sp|O54984|ASNA_MOUSE	Asna1	4	0.0526189	0.522675	0.757554
sp|P08226|APOE_MOUSE	Apoe	18	0.0518344	0.364296	0.655913
sp|P14231|AT1B2_MOUSE	Atp1b2	8	0.0510314	0.852245	0.942554
sp|Q8C7X2|EMC1_MOUSE	Emc1	25	0.0509114	0.853309	0.94299
sp|B2RY56|RBM25_MOUSE	Rbm25	13	0.0503741	0.732028	0.879307
sp|Q9D0F3|LMAN1_MOUSE	Lman1	12	0.0498669	0.399606	0.674084
sp|Q6PDQ2|CHD4_MOUSE	Chd4	44	0.049562	0.895509	0.963185
sp|Q9Z1M8|RED_MOUSE	Ik	8	0.0485767	0.71812	0.869271
sp|Q9CY27|TECR_MOUSE	Tecr	9	0.0484677	0.914998	0.967166
sp|P62192|PRS4_MOUSE	Psmc1	9	0.0479981	0.658681	0.837453
sp|Q9QZQ8|H2AY_MOUSE	H2afy	12	0.0467882	0.329621	0.623403
sp|Q8BFR5|EFTU_MOUSE	Tufm	13	0.0458991	0.810795	0.924293
sp|Q9CW03|SMC3_MOUSE	Smc3	34	0.0458698	0.426398	0.696169
sp|O35226|PSMD4_MOUSE	Psmd4	4	0.0441846	0.924222	0.97155
sp|G5E870|TRIPC_MOUSE	Trip12	35	0.0420909	0.954453	0.987542
sp|P53784|SOX3_MOUSE	Sox3	4	0.0406426	0.413762	0.682659
sp|Q9CY58|PAIRB_MOUSE	Serbp1	17	0.0404663	0.466083	0.723325
sp|P46471|PRS7_MOUSE	Psmc2	14	0.0404635	0.998352	0.998492
sp|Q9D1E8|PLCE_MOUSE	Agpat5	5	0.0391539	0.866783	0.951412
sp|P62830|RL23_MOUSE	Rpl23	15	0.0374993	0.656638	0.836658
sp|P99027|RLA2_MOUSE	Rplp2	6	0.0368944	0.559799	0.771438
sp|Q9D517|PLCC_MOUSE	Agpat3	8	0.0363641	0.919687	0.969637
sp|Q99MR6|SRRT_MOUSE	Srrt	9	0.0360691	0.884034	0.958157
sp|P62309|RUXG_MOUSE	Snrpg	4	0.0358116	0.831521	0.933556
sp|P43006|EAA2_MOUSE	Slc1a2	4	0.0353064	0.246409	0.565457
sp|Q3TAS6|EMC10_MOUSE	Emc10	5	0.0344821	0.634557	0.829782
sp|Q9ESX5|DKC1_MOUSE	Dkc1	10	0.0336296	0.412999	0.6822
sp|Q8BMF4|ODP2_MOUSE	Dlat	7	0.0328302	0.56553	0.776218
sp|Q8C854|MYEF2_MOUSE	Myef2	49	0.0323675	0.607327	0.810345
sp|O35900|LSM2_MOUSE	Lsm2	4	0.0311873	0.528487	0.760265
sp|P68433|H31_MOUSE	Hist1h3a	11	0.0301629	0.352276	0.642118
sp|Q9WV60|GSK3B_MOUSE	Gsk3b	5	0.0275141	0.365764	0.655913
sp|P31650|S6A11_MOUSE	Slc6a11	4	0.0270841	0.697841	0.857243
sp|O08582|GTPB1_MOUSE	Gtpbp1	7	0.0267378	0.770047	0.903657
sp|Q8CCF0|PRP31_MOUSE	Prpf31	7	0.025763	0.2523	0.566329
sp|Q01853|TERA_MOUSE	Vcp	10	0.0248961	0.668593	0.841866
sp|Q9Z0N1|IF2G_MOUSE	Eif2s3x	18	0.0223581	0.808095	0.924293
sp|Q9QYA2|TOM40_MOUSE	Tomm40	4	0.0219955	0.83042	0.933522
sp|P25976|UBF1_MOUSE	Ubtf	4	0.0210198	0.877228	0.957944
sp|P55066|NCAN_MOUSE	Ncan	8	0.0184227	0.412415	0.6822
sp|Q9WV55|VAPA_MOUSE	Vapa	12	0.0181955	0.595023	0.799449
sp|P47963|RL13_MOUSE	Rpl13	21	0.0181032	0.971969	0.995273
sp|P42669|PURA_MOUSE	Pura	7	0.0168629	0.554969	0.770892
sp|P97863|NFIB_MOUSE	Nfib	8	0.0167164	0.829857	0.933522
sp|Q91W50|CSDE1_MOUSE	Csde1	38	0.0150413	0.255785	0.572065
sp|Q62448|IF4G2_MOUSE	Eif4g2	7	0.0147307	0.4892	0.737366
sp|Q91YT0|NDUV1_MOUSE	Ndufv1	14	0.0145566	0.866356	0.951412
sp|Q8C052|MAP1S_MOUSE	Map1s	14	0.0134153	0.896986	0.964038
sp|P61358|RL27_MOUSE	Rpl27	16	0.0127624	0.572886	0.782167
sp|Q920L1|FADS1_MOUSE	Fads1	12	0.011865	0.878967	0.957944
sp|P42932|TCPQ_MOUSE	Cct8	16	0.0111445	0.937644	0.979348
sp|Q3TVI8|PBIP1_MOUSE	Pbxip1	26	0.00883678	0.538477	0.765604
sp|Q9DCF9|SSRG_MOUSE	Ssr3	6	0.00866012	0.767936	0.903657
sp|Q9DC70|NDUS7_MOUSE	Ndufs7	5	0.00857791	0.326381	0.623239
sp|Q9EP72|EMC7_MOUSE	Emc7	9	0.00609991	0.980205	0.995552
sp|Q9D1D4|TMEDA_MOUSE	Tmed10	9	0.00282092	0.685177	0.848343
sp|Q9QXZ0|MACF1_MOUSE	Macf1	21	0.00129963	0.77067	0.903657
sp|Q8BG32|PSD11_MOUSE	Psmd11	8	0.00127863	0.420441	0.688251
sp|P23116|EIF3A_MOUSE	Eif3a	51	0.0010267	0.806906	0.924293
sp|P54276|MSH6_MOUSE	Msh6	13	-0.00063908	0.528816	0.760265
sp|P49718|MCM5_MOUSE	Mcm5	26	-0.000819511	0.641472	0.829782
sp|Q91Z67|SRGP2_MOUSE	Srgap2	14	-0.00170477	0.669308	0.842013
sp|Q99M28|RNPS1_MOUSE	Rnps1	6	-0.00179449	0.620381	0.821539
sp|Q5SS80|DHR13_MOUSE	Dhrs13	4	-0.00246162	0.943042	0.98078
sp|Q9D6R2|IDH3A_MOUSE	Idh3a	13	-0.00317633	0.97892	0.995552
sp|P40124|CAP1_MOUSE	Cap1	7	-0.00332846	0.453222	0.721931
sp|P47911|RL6_MOUSE	Rpl6	22	-0.0039523	0.640826	0.829782
sp|Q9EP69|SAC1_MOUSE	Sacm1l	17	-0.00410497	0.785914	0.911351
sp|Q791V5|MTCH2_MOUSE	Mtch2	5	-0.00485869	0.420571	0.688251
sp|P56564|EAA1_MOUSE	Slc1a3	8	-0.00499711	0.582241	0.791107
sp|Q8VHR5|P66B_MOUSE	Gatad2b	9	-0.00743792	0.763983	0.903657
sp|P49717|MCM4_MOUSE	Mcm4	15	-0.0083128	0.842062	0.937518
sp|Q62376|RU17_MOUSE	Snrnp70	19	-0.00837791	0.702733	0.858475
sp|Q501J6|DDX17_MOUSE	Ddx17	25	-0.00854708	0.893184	0.963185
sp|P14685|PSMD3_MOUSE	Psmd3	15	-0.00912473	0.994382	0.998278
sp|P12970|RL7A_MOUSE	Rpl7a	28	-0.00982284	0.998135	0.998492
sp|Q8VDP4|CCAR2_MOUSE	Ccar2	19	-0.0100129	0.655731	0.836658
sp|Q3TKT4|SMCA4_MOUSE	Smarca4	12	-0.0113487	0.680407	0.848343
sp|Q6P9S0|MTSSL_MOUSE	Mtss1l	8	-0.0124998	0.456237	0.722212
sp|P51174|ACADL_MOUSE	Acadl	6	-0.0127284	0.715466	0.866803
sp|P52479|UBP10_MOUSE	Usp10	5	-0.0141672	0.795637	0.917253
sp|P62983|RS27A_MOUSE	Rps27a	9	-0.014199	0.428391	0.697015
sp|Q9DBN5|LONP2_MOUSE	Lonp2	5	-0.0158577	0.528895	0.760265
sp|Q8CFG0|SULF2_MOUSE	Sulf2	15	-0.0166179	0.456733	0.722212
sp|Q8R050|ERF3A_MOUSE	Gspt1	4	-0.0180288	0.401465	0.674088
sp|P39447|ZO1_MOUSE	Tjp1	28	-0.0180584	0.90823	0.967044
sp|Q99KI3|EMC3_MOUSE	Emc3	7	-0.0182382	0.810376	0.924293
sp|Q922F4|TBB6_MOUSE	Tubb6	8	-0.0188124	0.806133	0.924293
sp|P62855|RS26_MOUSE	Rps26	5	-0.0190804	0.518664	0.754177
sp|P80318|TCPG_MOUSE	Cct3	26	-0.0194606	0.741664	0.887854
sp|P84091|AP2M1_MOUSE	Ap2m1	16	-0.0196064	0.984305	0.99776
sp|Q91XI1|DUS3L_MOUSE	Dus3l	10	-0.0198279	0.339693	0.628946
sp|P63158|HMGB1_MOUSE	Hmgb1	13	-0.0201661	0.990047	0.998278
sp|Q9WTX5|SKP1_MOUSE	Skp1	4	-0.0206509	0.633451	0.829782
sp|Q61595|KTN1_MOUSE	Ktn1	32	-0.0234173	0.772319	0.903657
sp|Q61029|LAP2B_MOUSE	Tmpo(lap2b)	27	-0.0236718	0.339354	0.967044
sp|P09602|HMGN2_MOUSE	Hmgn2	11	-0.0245041	0.875033	0.957732
sp|Q810A7|DDX42_MOUSE	Ddx42	10	-0.0247001	0.263878	0.578233
sp|Q3TEA8|HP1B3_MOUSE	Hp1bp3	32	-0.0259384	0.729804	0.878134
sp|Q922U1|PRPF3_MOUSE	Prpf3	10	-0.0277279	0.661394	0.837734
sp|O35841|API5_MOUSE	Api5	6	-0.028397	0.274939	0.584185
sp|Q9Z2I0|LETM1_MOUSE	Letm1	5	-0.0293226	0.379314	0.662272
sp|P28659|CELF1_MOUSE	Celf1	7	-0.0300983	0.852204	0.942554
sp|P03995|GFAP_MOUSE	Gfap	57	-0.0316523	0.496885	0.741643
sp|Q80UM3|NAA15_MOUSE	Naa15	11	-0.0348202	0.428993	0.697015
sp|Q9QUI0|RHOA_MOUSE	Rhoa	8	-0.0349611	0.843034	0.937518
sp|Q8BRT1|CLAP2_MOUSE	Clasp2	26	-0.0355238	0.796167	0.917253
sp|P35585|AP1M1_MOUSE	Ap1m1	5	-0.0364183	0.655387	0.836658
sp|O70492|SNX3_MOUSE	Snx3	7	-0.0378122	0.398462	0.673182
sp|Q99PL5|RRBP1_MOUSE	Rrbp1	85	-0.0384491	0.971879	0.995273
sp|Q9CZW5|TOM70_MOUSE	Tomm70	10	-0.0403328	0.777679	0.907077
sp|Q9R190|MTA2_MOUSE	Mta2	6	-0.0426943	0.310589	0.608459
sp|Q64511|TOP2B_MOUSE	Top2b	28	-0.0430802	0.927899	0.9735
sp|E1U8D0|SOGA1_MOUSE	Soga1	20	-0.0438805	0.843909	0.937535
sp|Q6ZQ38|CAND1_MOUSE	Cand1	7	-0.0449142	0.26754	0.581652
sp|Q61545|EWS_MOUSE	Ewsr1	8	-0.0453656	0.651778	0.834869
sp|Q9Z2X1|HNRPF_MOUSE	Hnrnpf	16	-0.0457018	0.458075	0.722212
sp|Q80WJ7|LYRIC_MOUSE	Mtdh	21	-0.0457422	0.96385	0.992737
sp|Q921M3|SF3B3_MOUSE	Sf3b3	18	-0.0459739	0.473486	0.727028
sp|P35601|RFC1_MOUSE	Rfc1	7	-0.0462239	0.954032	0.987542
sp|Q8R1V4|TMED4_MOUSE	Tmed4	5	-0.0463462	0.702169	0.858475
sp|Q9CRB9|MIC19_MOUSE	Chchd3	12	-0.0465477	0.551632	0.769554
sp|P70404|IDHG1_MOUSE	Idh3g	7	-0.0476878	0.489592	0.737366
sp|Q02780|NFIA_MOUSE	Nfia	5	-0.0486996	0.817488	0.927844
sp|P18653|KS6A1_MOUSE	Rps6ka1	5	-0.048892	0.955995	0.987688
sp|O70305|ATX2_MOUSE	Atxn2	5	-0.0490239	0.674527	0.845559
sp|Q9CQN1|TRAP1_MOUSE	Trap1	17	-0.0495123	0.780601	0.908251
sp|Q9D0F6|RFC5_MOUSE	Rfc5	7	-0.0502718	0.823446	0.929705
sp|Q8VDM4|PSMD2_MOUSE	Psmd2	5	-0.0508174	0.91108	0.967044
sp|Q8CAQ8|MIC60_MOUSE	Immt	42	-0.051894	0.462003	0.723325
sp|O70252|HMOX2_MOUSE	Hmox2	5	-0.051903	0.308136	0.608459
sp|P14869|RLA0_MOUSE	Rplp0	18	-0.0523427	0.998492	0.998492
sp|F8VPU2|FARP1_MOUSE	Farp1	8	-0.0526374	0.44848	0.718533
sp|Q60605|MYL6_MOUSE	Myl6	5	-0.0529146	0.312219	0.608459
sp|Q9Z1Q9|SYVC_MOUSE	Vars	26	-0.0535709	0.632458	0.829782
sp|P17427|AP2A2_MOUSE	Ap2a2	5	-0.053596	0.890917	0.962651
sp|O35737|HNRH1_MOUSE	Hnrnph1	20	-0.0545944	0.52071	0.755592
sp|Q9WUA2|SYFB_MOUSE	Farsb	9	-0.0549522	0.647932	0.832211
sp|Q6A026|PDS5A_MOUSE	Pds5a	13	-0.0565418	0.478919	0.731092
sp|Q6PE01|SNR40_MOUSE	Snrnp40	13	-0.0569955	0.751112	0.895361
sp|P17095|HMGA1_MOUSE	Hmga1	5	-0.0590898	0.92204	0.970329
sp|Q9CZX0|ELP3_MOUSE	Elp3	5	-0.0593808	0.774105	0.903657
sp|Q9ESZ8|GTF2I_MOUSE	Gtf2i	20	-0.0596139	0.6851	0.848343
sp|P14115|RL27A_MOUSE	Rpl27a	12	-0.0607566	0.995478	0.998278
sp|P60843|IF4A1_MOUSE	Eif4a1	19	-0.0644626	0.878384	0.957944
sp|Q9CXS4|CENPV_MOUSE	Cenpv	12	-0.065852	0.724606	0.875617
sp|Q9DB41|GHC2_MOUSE	Slc25a18	15	-0.0660521	0.690079	0.852166
sp|Q99L45|IF2B_MOUSE	Eif2s2	17	-0.0665107	0.591964	0.797397
sp|Q9JKR6|HYOU1_MOUSE	Hyou1	5	-0.0666539	0.404077	0.675701
sp|Q4VA53|PDS5B_MOUSE	Pds5b	27	-0.0676416	0.880574	0.957949
sp|Q99JB2|STML2_MOUSE	Stoml2	6	-0.068079	0.668542	0.841866
sp|Q8BJW6|EIF2A_MOUSE	Eif2a	6	-0.0684176	0.501278	0.744257
sp|Q60930|VDAC2_MOUSE	Vdac2	18	-0.0692515	0.646051	0.832211
sp|Q99JF8|PSIP1_MOUSE	Psip1	21	-0.0706053	0.7847	0.910743
sp|O88712|CTBP1_MOUSE	Ctbp1	7	-0.0708088	0.973327	0.995273
sp|P59999|ARPC4_MOUSE	Arpc4	4	-0.0709265	0.909477	0.967044
sp|Q9CSN1|SNW1_MOUSE	Snw1	7	-0.0718266	0.38575	0.668539
sp|Q8BUR4|DOCK1_MOUSE	Dock1	4	-0.0722209	0.394513	0.671255
sp|O35593|PSDE_MOUSE	Psmd14	5	-0.0733074	0.535831	0.764155
sp|Q6NZJ6|IF4G1_MOUSE	Eif4g1	19	-0.0741802	0.748817	0.893381
sp|Q91WJ8|FUBP1_MOUSE	Fubp1	17	-0.0748043	0.217684	0.559571
sp|Q9CU62|SMC1A_MOUSE	Smc1a	26	-0.0760239	0.368349	0.656136
sp|P62754|RS6_MOUSE	Rps6	23	-0.076707	0.943888	0.98078
sp|Q8CCP0|NEMF_MOUSE	Nemf	7	-0.0769089	0.764667	0.903657
sp|Q6A068|CDC5L_MOUSE	Cdc5l	29	-0.077287	0.985194	0.997878
sp|Q9JJ28|FLII_MOUSE	Flii	4	-0.0788522	0.637792	0.829782
sp|Q3UPL0|SC31A_MOUSE	Sec31a	10	-0.0789733	0.479711	0.731508
sp|Q9CPR4|RL17_MOUSE	Rpl17	20	-0.0796762	0.995939	0.998278
sp|Q9QZD9|EIF3I_MOUSE	Eif3i	8	-0.0804303	0.554281	0.770892
sp|Q9CX56|PSMD8_MOUSE	Psmd8	4	-0.0835302	0.360827	0.652639
sp|Q91VS7|MGST1_MOUSE	Mgst1	6	-0.0845935	0.907831	0.967044
sp|Q61753|SERA_MOUSE	Phgdh	15	-0.0852642	0.468039	0.725456
sp|P35821|PTN1_MOUSE	Ptpn1	4	-0.0857004	0.94098	0.98078
sp|Q8BSY0|ASPH_MOUSE	Asph	14	-0.0877408	0.227331	0.560159
sp|P19253|RL13A_MOUSE	Rpl13a	16	-0.0879868	0.262824	0.577918
sp|Q99JR1|SFXN1_MOUSE	Sfxn1	12	-0.0884783	0.715403	0.866803
sp|P62821|RAB1A_MOUSE	Rab1A	8	-0.0887723	0.663994	0.839074
sp|P61222|ABCE1_MOUSE	Abce1	7	-0.0889275	0.967956	0.995273
sp|Q3UFY8|MRRP1_MOUSE	Trmt10c	4	-0.0890543	0.138232	0.461939
sp|Q920B9|SP16H_MOUSE	Supt16h	15	-0.0903252	0.30838	0.608459
sp|Q8JZQ9|EIF3B_MOUSE	Eif3b	16	-0.090695	0.974082	0.995273
sp|Q07417|ACADS_MOUSE	Acads	7	-0.0914614	0.770421	0.903657
sp|Q80XN0|BDH_MOUSE	Bdh1	4	-0.0927306	0.60305	0.80693
sp|P56399|UBP5_MOUSE	Usp5	4	-0.0954344	0.238604	0.565457
sp|B1AZI6|THOC2_MOUSE	Thoc2	6	-0.0957311	0.347155	0.636902
sp|P55096|ABCD3_MOUSE	Abcd3	30	-0.0959991	0.990308	0.998278
sp|Q8CIE6|COPA_MOUSE	Copa	44	-0.0967585	0.190205	0.531665
sp|Q99104|MYO5A_MOUSE	Myo5a	37	-0.0975677	0.400377	0.674084
sp|Q8BXK8|AGAP1_MOUSE	Agap1	4	-0.0982862	0.35045	0.639617
sp|P35486|ODPA_MOUSE	Pdha1	11	-0.0983085	0.504885	0.747252
sp|P99024|TBB5_MOUSE	Tubb5	4	-0.0984578	0.357843	0.649744
sp|P47915|RL29_MOUSE	Rpl29	9	-0.0989217	0.773426	0.903657
sp|P54071|IDHP_MOUSE	Idh2	15	-0.098948	0.731516	0.879307
sp|A2AN08|UBR4_MOUSE	Ubr4	6	-0.099424	0.472236	0.726805
sp|Q8R1B4|EIF3C_MOUSE	Eif3c	23	-0.0994904	0.979975	0.995552
sp|P20152|VIME_MOUSE	Vim	72	-0.101359	0.296764	0.60258
sp|Q3V009|TMED1_MOUSE	Tmed1	4	-0.102878	0.692098	0.853164
sp|P35279|RAB6A_MOUSE	Rab6a	9	-0.106381	0.842904	0.937518
sp|Q9Z315|SNUT1_MOUSE	Sart1	18	-0.108155	0.973649	0.995273
sp|Q9D8E6|RL4_MOUSE	Rpl4	37	-0.109051	0.95145	0.986456
sp|O70318|E41L2_MOUSE	Epb41l2	13	-0.109111	0.44713	0.717547
sp|Q8CCJ3|UFL1_MOUSE	Ufl1	5	-0.110752	0.367899	0.656136
sp|Q8BFZ9|ERLN2_MOUSE	Erlin2	16	-0.110995	0.462096	0.723325
sp|Q8BHC4|DCAKD_MOUSE	Dcakd	10	-0.111667	0.26067	0.574778
sp|Q99LE6|ABCF2_MOUSE	Abcf2	5	-0.111765	0.922123	0.970329
sp|P31938|MP2K1_MOUSE	Map2k1	5	-0.111981	0.530928	0.760265
sp|Q9Z204|HNRPC_MOUSE	Hnrnpc	23	-0.112807	0.525239	0.757638
sp|P43406|ITAV_MOUSE	Itgav	8	-0.113284	0.262914	0.577918
sp|Q99PV0|PRP8_MOUSE	Prpf8	73	-0.113803	0.324906	0.622001
sp|P29416|HEXA_MOUSE	Hexa	4	-0.114429	0.639593	0.829782
sp|P15864|H12_MOUSE	Hist1h1c	25	-0.114913	0.606999	0.810345
sp|P62334|PRS10_MOUSE	Psmc6	15	-0.116145	0.910263	0.967044
sp|Q9DCH4|EIF3F_MOUSE	Eif3f	9	-0.116639	0.62281	0.823981
sp|Q3U9G9|LBR_MOUSE	Lbr	12	-0.117261	0.969573	0.995273
sp|Q6PDG5|SMRC2_MOUSE	Smarcc2	6	-0.117304	0.346432	0.636405
sp|O88343|S4A4_MOUSE	Slc4a4	11	-0.118658	0.639181	0.829782
sp|Q5XJY5|COPD_MOUSE	Arcn1	6	-0.120342	0.463011	0.723325
sp|Q922V4|PLRG1_MOUSE	Plrg1	5	-0.120876	0.162534	0.502215
sp|Q9Z1Z2|STRAP_MOUSE	Strap	11	-0.120909	0.304557	0.608459
sp|Q8K3J1|NDUS8_MOUSE	Ndufs8	4	-0.121017	0.49483	0.740825
sp|O89086|RBM3_MOUSE	Rbm3	9	-0.122685	0.638386	0.829782
sp|Q9CR57|RL14_MOUSE	Rpl14	13	-0.1231	0.305028	0.608459
sp|Q99JI4|PSMD6_MOUSE	Psmd6	4	-0.124142	0.168654	0.506681
sp|Q569Z5|DDX46_MOUSE	Ddx46	13	-0.12433	0.806754	0.924293
sp|Q01279|EGFR_MOUSE	Egfr	4	-0.126125	0.160595	0.498412
sp|Q8R0X7|SGPL1_MOUSE	Sgpl1	25	-0.126552	0.330656	0.624523
sp|Q05D44|IF2P_MOUSE	Eif5b	14	-0.126691	0.748792	0.893381
sp|Q3TDQ1|STT3B_MOUSE	Stt3b	19	-0.128566	0.919055	0.969637
sp|Q922Q1|MARC2_MOUSE	Marc2	8	-0.13034	0.28711	0.595032
sp|P14733|LMNB1_MOUSE	Lmnb1	44	-0.13141	0.422776	0.691058
sp|Q9DCD2|SYF1_MOUSE	Xab2	7	-0.132878	0.222207	0.559571
sp|Q76MZ3|2AAA_MOUSE	Ppp2r1a	5	-0.133852	0.244654	0.565457
sp|Q9JHU4|DYHC1_MOUSE	Dync1h1	128	-0.134041	0.473677	0.727028
sp|Q9WUK4|RFC2_MOUSE	Rfc2	6	-0.134421	0.889771	0.962154
sp|Q9DC28|KC1D_MOUSE	Csnk1d	9	-0.13569	0.260052	0.574778
sp|Q6ZWV3|RL10_MOUSE	Rpl10	19	-0.136911	0.21801	0.559571
sp|Q9CR68|UCRI_MOUSE	Uqcrfs1	8	-0.136963	0.833217	0.934715
sp|P42227|STAT3_MOUSE	Stat3	14	-0.137576	0.627396	0.827675
sp|Q9D0E1|HNRPM_MOUSE	Hnrnpm	55	-0.138263	0.313722	0.608892
sp|Q9WUQ2|PREB_MOUSE	Preb	9	-0.138289	0.963512	0.992737
sp|Q9ERU3|ZNF22_MOUSE	Znf22	9	-0.138367	0.477915	0.730893
sp|P27546|MAP4_MOUSE	Map4	35	-0.138986	0.894462	0.963185
sp|P97351|RS3A_MOUSE	Rps3a	36	-0.139022	0.271926	0.584061
sp|Q9DBG6|RPN2_MOUSE	Rpn2	18	-0.13915	0.977574	0.995552
sp|P97855|G3BP1_MOUSE	G3bp1	19	-0.13972	0.899364	0.96527
sp|Q9DCN2|NB5R3_MOUSE	Cyb5r3	11	-0.140959	0.909422	0.967044
sp|P27659|RL3_MOUSE	Rpl3	37	-0.143112	0.24572	0.565457
sp|Q02248|CTNB1_MOUSE	Ctnnb1	6	-0.143125	0.545515	0.767863
sp|Q91YJ3|THYN1_MOUSE	Thyn1	7	-0.14339	0.231895	0.560159
sp|P13439|UMPS_MOUSE	Umps	4	-0.143702	0.118191	0.427025
sp|O88685|PRS6A_MOUSE	Psmc3	9	-0.144294	0.21065	0.558957
sp|P14094|AT1B1_MOUSE	Atp1b1	4	-0.144633	0.912597	0.967044
sp|Q80V26|IMPA3_MOUSE	Impad1	6	-0.145053	0.429883	0.697015
sp|Q00PI9|HNRL2_MOUSE	Hnrnpul2	39	-0.145261	0.683136	0.848343
sp|Q9WUM5|SUCA_MOUSE	Suclg1	5	-0.145943	0.699078	0.858015
sp|Q9CXZ1|NDUS4_MOUSE	Ndufs4	5	-0.145995	0.830828	0.933522
sp|Q8BL97|SRSF7_MOUSE	Srsf7	10	-0.151322	0.828916	0.933522
sp|Q9CZM2|RL15_MOUSE	Rpl15	15	-0.152802	0.459263	0.722212
sp|Q8K0L9|ZBT20_MOUSE	Zbtb20	5	-0.1533	0.97285	0.995273
sp|Q9CQC7|NDUB4_MOUSE	Ndufb4	4	-0.153363	0.584024	0.792724
sp|Q9QYG0|NDRG2_MOUSE	Ndrg2	4	-0.154961	0.673981	0.845559
sp|Q9DAW9|CNN3_MOUSE	Cnn3	14	-0.15661	0.684009	0.848343
sp|Q9WUK2|IF4H_MOUSE	Eif4h	4	-0.157178	0.310003	0.608459
sp|Q61263|SOAT1_MOUSE	Soat1	4	-0.15814	0.875486	0.957732
sp|P62858|RS28_MOUSE	Rps28	7	-0.161333	0.512335	0.7516
sp|P25206|MCM3_MOUSE	Mcm3	19	-0.161981	0.377019	0.661831
sp|P56960|EXOSX_MOUSE	Exosc10	6	-0.162896	0.104322	0.414894
sp|P28658|ATX10_MOUSE	Atxn10	12	-0.163044	0.682012	0.848343
sp|Q8VD75|HIP1_MOUSE	Hip1	14	-0.163403	0.0879934	0.391112
sp|O35465|FKBP8_MOUSE	Fkbp8	8	-0.164308	0.123024	0.436008
sp|Q78IS1|TMED3_MOUSE	Tmed3	6	-0.165613	0.337907	0.628946
sp|P21956|MFGM_MOUSE	Mfge8	4	-0.166097	0.647727	0.832211
sp|Q6P4T2|U520_MOUSE	Snrnp200	52	-0.166214	0.298567	0.60258
sp|Q9QY81|PO210_MOUSE	Nup210	11	-0.166631	0.32732	0.623239
sp|O55143|AT2A2_MOUSE	Atp2a2	39	-0.167806	0.520259	0.755592
sp|A2AR02|PPIG_MOUSE	Ppig	10	-0.169772	0.86096	0.948469
sp|O08810|U5S1_MOUSE	Eftud2	38	-0.170353	0.227041	0.560159
sp|O55131|SEPT7_MOUSE	Septin07	19	-0.17371	0.140879	0.467055
sp|Q80U93|NU214_MOUSE	Nup214	4	-0.174943	0.169965	0.507081
sp|Q9QYC0|ADDA_MOUSE	Add1	12	-0.175832	0.378228	0.662016
sp|Q8CI51|PDLI5_MOUSE	Pdlim5	11	-0.180506	0.316234	0.612052
sp|Q62189|SNRPA_MOUSE	Snrpa	7	-0.18052	0.189818	0.531665
sp|P62911|RL32_MOUSE	Rpl32	9	-0.18185	0.268971	0.583047
sp|P57780|ACTN4_MOUSE	Actn4	13	-0.183251	0.291635	0.599875
sp|P97379|G3BP2_MOUSE	G3bp2	18	-0.183337	0.97229	0.995273
sp|Q8BGY2|IF5A2_MOUSE	Eif5a2	5	-0.185057	0.199979	0.540157
sp|Q60865|CAPR1_MOUSE	Caprin1	20	-0.189371	0.672908	0.845034
sp|P61514|RL37A_MOUSE	Rpl37a	7	-0.190514	0.102847	0.414894
sp|P41105|RL28_MOUSE	Rpl28	15	-0.191463	0.143113	0.46839
sp|Q6P5D8|SMHD1_MOUSE	Smchd1	21	-0.192567	0.300648	0.60258
sp|P16546|SPTN1_MOUSE	Sptan1	6	-0.193757	0.31487	0.610251
sp|P09405|NUCL_MOUSE	Ncl	50	-0.194171	0.0641371	0.354389
sp|P60710|ACTB_MOUSE	Actb	33	-0.195543	0.168637	0.506681
sp|P14148|RL7_MOUSE	Rpl7	28	-0.196249	0.39109	0.671255
sp|Q8R4R6|NUP53_MOUSE	Nup35	5	-0.198031	0.221617	0.559571
sp|Q6NV83|SR140_MOUSE	U2surp	22	-0.200122	0.54217	0.766986
sp|P28656|NP1L1_MOUSE	Nap1l1	4	-0.200322	0.371381	0.659038
sp|E9PVA8|GCN1_MOUSE	Gcn1	37	-0.200506	0.174922	0.510279
sp|P28660|NCKP1_MOUSE	Nckap1	6	-0.20155	0.956143	0.987688
sp|Q99NB9|SF3B1_MOUSE	Sf3b1	40	-0.201894	0.22765	0.560159
sp|P84104|SRSF3_MOUSE	Srsf3	15	-0.203313	0.119343	0.427874
sp|Q0P678|ZCH18_MOUSE	Zc3h18	5	-0.203565	0.810806	0.924293
sp|Q8BFY9|TNPO1_MOUSE	Tnpo1	11	-0.204146	0.466131	0.723325
sp|Q64012|RALY_MOUSE	Raly	16	-0.205029	0.0957349	0.408759
sp|P08752|GNAI2_MOUSE	Gnai2	18	-0.208253	0.637244	0.829782
sp|Q9JIF7|COPB_MOUSE	Copb1	9	-0.209794	0.250963	0.566329
sp|O55142|RL35A_MOUSE	Rpl35a	16	-0.212055	0.115234	0.424559
sp|Q91YR7|PRP6_MOUSE	Prpf6	17	-0.212305	0.991398	0.998278
sp|Q9Z1T1|AP3B1_MOUSE	Ap3b1	4	-0.212305	0.699859	0.858226
sp|P56959|FUS_MOUSE	Fus	14	-0.215362	0.523674	0.757554
sp|Q9DCA5|BRX1_MOUSE	Brix1	5	-0.215425	0.713781	0.866803
sp|Q9DCT2|NDUS3_MOUSE	Ndufs3	7	-0.217231	0.906887	0.967044
sp|P60122|RUVB1_MOUSE	Ruvbl1	6	-0.217861	0.0636204	0.354313
sp|Q9ERK4|XPO2_MOUSE	Cse1l	4	-0.217947	0.626375	0.827143
sp|Q62086|PON2_MOUSE	Pon2	6	-0.218192	0.322872	0.62035
sp|P09055|ITB1_MOUSE	Itgb1	11	-0.221601	0.195019	0.535636
sp|Q64331|MYO6_MOUSE	Myo6	34	-0.222189	0.17286	0.507416
sp|O08579|EMD_MOUSE	Emd	5	-0.222535	0.0865426	0.388383
sp|P47962|RL5_MOUSE	Rpl5	22	-0.223468	0.116505	0.425538
sp|P57784|RU2A_MOUSE	Snrpa1	6	-0.227114	0.858517	0.947243
sp|P35979|RL12_MOUSE	Rpl12	11	-0.227116	0.117189	0.425565
sp|P97311|MCM6_MOUSE	Mcm6	17	-0.22791	0.192684	0.532582
sp|P46735|MYO1B_MOUSE	Myo1b	11	-0.228779	0.10642	0.415047
sp|O08788|DCTN1_MOUSE	Dctn1	9	-0.230478	0.0687829	0.359818
sp|Q9EPU0|RENT1_MOUSE	Upf1	19	-0.230497	0.104836	0.414894
sp|P63073|IF4E_MOUSE	Eif4e	4	-0.231129	0.469275	0.725805
sp|Q8C8R3|ANK2_MOUSE	Ank2	35	-0.234241	0.168354	0.506681
sp|Q61033|LAP2A_MOUSE	Tmpo(lap2a)	7	-0.234494	0.339354	0.628946
sp|P42208|SEPT2_MOUSE	Septin02	14	-0.237861	0.482721	0.735165
sp|Q8K0C4|CP51A_MOUSE	Cyp51a1	7	-0.238964	0.357523	0.649744
sp|Q68FD5|CLH1_MOUSE	Cltc	51	-0.241283	0.216778	0.559571
sp|Q8BP67|RL24_MOUSE	Rpl24	13	-0.241764	0.242411	0.565457
sp|Q9Z1N5|DX39B_MOUSE	Ddx39b	11	-0.242275	0.134312	0.455862
sp|P11499|HS90B_MOUSE	Hsp90ab1	47	-0.242967	0.114867	0.424559
sp|P35980|RL18_MOUSE	Rpl18	14	-0.243937	0.180833	0.519977
sp|P43274|H14_MOUSE	Hist1h1e	9	-0.244319	0.566325	0.776218
sp|Q8R326|PSPC1_MOUSE	Pspc1	24	-0.245493	0.559596	0.771438
sp|Q9JJ80|RPF2_MOUSE	Rpf2	4	-0.245855	0.116687	0.425538
sp|Q9WTS2|FUT8_MOUSE	Fut8	5	-0.247149	0.126126	0.438796
sp|P43276|H15_MOUSE	Hist1h1b	14	-0.249255	0.753862	0.896364
sp|Q3TXS7|PSMD1_MOUSE	Psmd1	8	-0.249626	0.942719	0.98078
sp|Q62203|SF3A2_MOUSE	Sf3a2	6	-0.250237	0.180455	0.519961
sp|P43275|H11_MOUSE	Hist1h1a	6	-0.251933	0.167226	0.505626
sp|Q60714|S27A1_MOUSE	Slc27a1	18	-0.253315	0.661414	0.837734
sp|P09411|PGK1_MOUSE	Pgk1	9	-0.253643	0.272983	0.584185
sp|Q91WD5|NDUS2_MOUSE	Ndufs2	7	-0.254167	0.801207	0.922304
sp|P13864|DNMT1_MOUSE	Dnmt1	12	-0.257417	0.236172	0.562104
sp|P70168|IMB1_MOUSE	Kpnb1	9	-0.258939	0.113569	0.422663
sp|P19096|FAS_MOUSE	Fasn	33	-0.259273	0.286018	0.594394
sp|B2RQC6|PYR1_MOUSE	Cad	12	-0.261222	0.487175	0.737366
sp|Q61768|KINH_MOUSE	Kif5b	10	-0.264821	0.0716644	0.361592
sp|P62137|PP1A_MOUSE	Ppp1ca	4	-0.267093	0.145545	0.46839
sp|Q9QYB5|ADDG_MOUSE	Add3	10	-0.267698	0.0901423	0.394964
sp|Q8BTM8|FLNA_MOUSE	Flna	12	-0.269889	0.3335	0.625701
sp|Q7TMB8|CYFP1_MOUSE	Cyfip1	6	-0.272431	0.445169	0.71685
sp|P61750|ARF4_MOUSE	Arf4	5	-0.272671	0.144288	0.46839
sp|Q9CPS7|PNO1_MOUSE	Pno1	4	-0.273117	0.0989271	0.413846
sp|Q9QYF1|RDH11_MOUSE	Rdh11	6	-0.275398	0.189967	0.531665
sp|A2AGT5|CKAP5_MOUSE	Ckap5	26	-0.276142	0.332606	0.625691
sp|Q922D8|C1TC_MOUSE	Mthfd1	20	-0.278188	0.200979	0.540157
sp|Q99KP6|PRP19_MOUSE	Prpf19	21	-0.279454	0.2638	0.578233
sp|Q61879|MYH10_MOUSE	Myh10	27	-0.281197	0.035643	0.288626
sp|Q9DBS1|TMM43_MOUSE	Tmem43	4	-0.281612	0.221852	0.559571
sp|O09167|RL21_MOUSE	Rpl21	11	-0.284452	0.429505	0.697015
sp|P28740|KIF2A_MOUSE	Kif2a	15	-0.284723	0.0770922	0.365734
sp|Q91V61|SFXN3_MOUSE	Sfxn3	6	-0.287398	0.39406	0.671255
sp|Q91WT9|CBS_MOUSE	Cbs	5	-0.289279	0.996153	0.998278
sp|Q8CG47|SMC4_MOUSE	Smc4	14	-0.28991	0.993015	0.998278
sp|Q8R323|RFC3_MOUSE	Rfc3	4	-0.290766	0.445853	0.717131
sp|Q9QXA5|LSM4_MOUSE	Lsm4	5	-0.290975	0.0517352	0.332531
sp|Q8VE37|RCC1_MOUSE	Rcc1	8	-0.291913	0.903021	0.966836
sp|P54775|PRS6B_MOUSE	Psmc4	12	-0.293343	0.242385	0.565457
sp|Q8VH51|RBM39_MOUSE	Rbm39	12	-0.303637	0.0293125	0.272641
sp|Q80UG5|SEPT9_MOUSE	Septin09	27	-0.303943	0.103321	0.414894
sp|Q6ZWV7|RL35_MOUSE	Rpl35	10	-0.305445	0.972467	0.995273
sp|Q62261|SPTB2_MOUSE	Sptbn1	18	-0.305803	0.0690009	0.359818
sp|Q8K284|TF3C1_MOUSE	Gtf3c1	13	-0.3116	0.3853	0.668539
sp|Q9D5T0|ATAD1_MOUSE	Atad1	8	-0.311761	0.0476692	0.319838
sp|Q9CVB6|ARPC2_MOUSE	Arpc2	4	-0.313739	0.170946	0.507081
sp|Q9D8T7|SLIRP_MOUSE	Slirp	8	-0.314854	0.147258	0.46839
sp|P70372|ELAV1_MOUSE	Elavl1	19	-0.315073	0.0907433	0.395097
sp|O55222|ILK_MOUSE	Ilk	10	-0.315259	0.0222021	0.23699
sp|P35564|CALX_MOUSE	Canx	35	-0.319283	0.779996	0.908251
sp|Q9EP97|SENP3_MOUSE	Senp3	4	-0.320143	0.33451	0.626761
sp|O35685|NUDC_MOUSE	Nudc	4	-0.320728	0.108676	0.417494
sp|Q9DCL9|PUR6_MOUSE	Paics	7	-0.323528	0.484814	0.736848
sp|Q9D379|HYEP_MOUSE	Ephx1	10	-0.324017	0.0754013	0.363938
sp|Q69ZK0|PREX1_MOUSE	Prex1	10	-0.324786	0.781908	0.908251
sp|P62242|RS8_MOUSE	Rps8	19	-0.325225	0.300473	0.60258
sp|P62717|RL18A_MOUSE	Rpl18a	17	-0.325549	0.234033	0.560159
sp|P63089|PTN_MOUSE	Ptn	10	-0.337648	0.169471	0.507081
sp|Q9WTM5|RUVB2_MOUSE	Ruvbl2	9	-0.339245	0.019176	0.209449
sp|Q8BK64|AHSA1_MOUSE	Ahsa1	5	-0.341202	0.277531	0.584944
sp|Q9R0Q7|TEBP_MOUSE	Ptges3	4	-0.342333	0.377726	0.66196
sp|Q8CIB5|FERM2_MOUSE	Fermt2	15	-0.342403	0.0374316	0.296082
sp|P62196|PRS8_MOUSE	Psmc5	17	-0.34425	0.20137	0.540157
sp|Q922K7|NOP2_MOUSE	Nop2	8	-0.347617	0.217675	0.559571
sp|Q99PU5|ACBG1_MOUSE	Acsbg1	24	-0.348469	0.285299	0.593776
sp|Q8VDD5|MYH9_MOUSE	Myh9	105	-0.351298	0.0607684	0.350913
sp|O70194|EIF3D_MOUSE	Eif3d	15	-0.351442	0.0983648	0.413719
sp|P47754|CAZA2_MOUSE	Capza2	6	-0.354387	0.30622	0.608459
sp|Q80SW1|SAHH2_MOUSE	Ahcyl1	20	-0.363408	0.259395	0.574778
sp|Q9DBH5|LMAN2_MOUSE	Lman2	8	-0.365289	0.0992762	0.413846
sp|Q8C1B7|SEP11_MOUSE	Septin11	18	-0.369916	0.0136256	0.200584
sp|Q60737|CSK21_MOUSE	Csnk2a1	11	-0.372153	0.0360711	0.288774
sp|Q9D8W5|PSD12_MOUSE	Psmd12	9	-0.376344	0.518511	0.754177
sp|Q61136|PRP4B_MOUSE	Prpf4b	6	-0.376689	0.251016	0.566329
sp|Q80VL1|TDRKH_MOUSE	Tdrkh	4	-0.376816	0.0462087	0.319838
sp|Q9JII5|DAZP1_MOUSE	Dazap1	11	-0.377182	0.0766583	0.365639
sp|Q80W54|FACE1_MOUSE	Zmpste24	5	-0.383163	0.30969	0.608459
sp|P47757|CAPZB_MOUSE	Capzb	4	-0.385619	0.312094	0.608459
sp|P62962|PROF1_MOUSE	Pfn1	4	-0.396552	0.28359	0.591091
sp|Q91ZJ5|UGPA_MOUSE	Ugp2	4	-0.400677	0.0115185	0.185416
sp|Q62241|RU1C_MOUSE	Snrpc	6	-0.404154	0.0296054	0.272641
sp|P50544|ACADV_MOUSE	Acadvl	7	-0.404339	0.171692	0.507416
sp|Q9Z329|ITPR2_MOUSE	Itpr2	17	-0.408367	0.233473	0.560159
sp|P39054|DYN2_MOUSE	Dnm2	14	-0.409785	0.0599615	0.349073
sp|Q9CZW4|ACSL3_MOUSE	Acsl3	18	-0.428272	0.17085	0.507081
sp|Q8R310|TMCC3_MOUSE	Tmcc3	6	-0.455704	0.0472793	0.319838
sp|Q9JMH9|MY18A_MOUSE	Myo18a	9	-0.456735	0.0666667	0.357526
sp|P35278|RAB5C_MOUSE	Rab5c	7	-0.46054	0.0330217	0.282134
sp|Q9QYS9|QKI_MOUSE	Qki	25	-0.462979	0.0551738	0.342466
sp|Q9QZE5|COPG1_MOUSE	Copg1	5	-0.465728	0.0525991	0.333838
sp|P18242|CATD_MOUSE	Ctsd	4	-0.468016	0.820732	0.929591
sp|P97742|CPT1A_MOUSE	Cpt1a	6	-0.473855	0.0634873	0.354313
sp|Q8BKC5|IPO5_MOUSE	Ipo5	5	-0.476854	0.105784	0.414894
sp|Q6P5H2|NEST_MOUSE	Nes	11	-0.488287	0.0185335	0.209449
sp|Q9CZD5|IF3M_MOUSE	Mtif3	7	-0.498764	0.0227737	0.239464
sp|P68040|RACK1_MOUSE	Rack1	5	-0.501821	0.336538	0.628946
sp|Q921F4|HNRLL_MOUSE	Hnrnpll	21	-0.507953	0.0067078	0.13899
sp|Q9Z1D1|EIF3G_MOUSE	Eif3g	5	-0.511731	0.678863	0.848343
sp|O88844|IDHC_MOUSE	Idh1	12	-0.521715	0.201601	0.540157
sp|Q61316|HSP74_MOUSE	Hspa4	5	-0.53573	0.451417	0.721142
sp|P11214|TPA_MOUSE	Plat	16	-0.54661	0.0271104	0.264287
sp|P26231|CTNA1_MOUSE	Ctnna1	6	-0.551058	0.156621	0.491488
sp|Q921E2|RAB31_MOUSE	Rab31	6	-0.566715	0.0466394	0.319838
sp|Q9CQH7|BT3L4_MOUSE	Btf3l4	4	-0.595185	0.838717	0.937518
sp|P63323|RS12_MOUSE	Rps12	4	-0.630407	0.00363456	0.108959
sp|Q9D883|U2AF1_MOUSE	U2af1	14	-0.646744	0.00133015	0.0749672
sp|Q99L04|DHRS1_MOUSE	Dhrs1	4	-0.656181	0.2775	0.584944
sp|Q8R1A4|DOCK7_MOUSE	Dock7	5	-0.67075	0.266972	0.581652
sp|Q6PB66|LPPRC_MOUSE	Lrpprc	50	-0.673618	0.000725676	0.0486894
sp|Q9WVJ2|PSD13_MOUSE	Psmd13	9	-0.702725	0.0704316	0.361235
sp|Q8VCB1|NDC1_MOUSE	Ndc1	5	-0.709559	0.00664892	0.13899
sp|P26369|U2AF2_MOUSE	U2af2	14	-0.715392	0.00362702	0.108959
sp|Q8CGC7|SYEP_MOUSE	Eprs	70	-0.720211	0.00175462	0.0861616
sp|Q68FL6|SYMC_MOUSE	Mars	19	-0.787864	0.00332667	0.106786
sp|Q80WW9|DDRGK_MOUSE	Ddrgk1	4	-0.854855	0.00505688	0.125002
sp|Q8BMJ2|SYLC_MOUSE	Lars	6	-0.895522	0.00306427	0.105306
sp|Q8R010|AIMP2_MOUSE	Aimp2	6	-0.898462	0.0029692	0.10459
sp|P16045|LEG1_MOUSE	Lgals1	4	-0.910857	0.0437214	0.314955
sp|Q9D0I9|SYRC_MOUSE	Rars	22	-0.922588	0.000222927	0.022436
sp|Q922B2|SYDC_MOUSE	Dars	25	-0.982027	0.00159165	0.0861616
sp|P68254|1433T_MOUSE	Ywhaq	4	-1.23265	0.0804565	0.374136
sp|Q8BU30|SYIC_MOUSE	Iars	12	-1.01841	0.00171043	0.0861616
sp|Q8K310|MATR3_MOUSE	Matr3	53	-1.0812	5.64171e-05	0.00883242
sp|P70318|TIAR_MOUSE	Tial1	5	-1.08463	0.000169407	0.0197191
sp|Q9D1M4|MCA3_MOUSE	Eef1e1	7	-1.10073	0.00126782	0.0744313
sp|Q80XP8|FA76B_MOUSE	Fam76b	5	-1.10098	0.00193414	0.0898958
sp|P31230|AIMP1_MOUSE	Aimp1	13	-1.12794	0.000499164	0.0351661
sp|Q3UEB3|PUF60_MOUSE	Puf60	9	-1.14586	0.000258322	0.0227484
sp|Q8BHD7|PTBP3_MOUSE	Ptbp3	5	-1.32234	4.57691e-05	0.00806109
sp|Q99MN1|SYK_MOUSE	Kars	25	-1.32894	8.48955e-05	0.0119618
sp|P60335|PCBP1_MOUSE	Pcbp1	17	-1.44495	1.2911e-05	0.0025988
sp|P61979|HNRPK_MOUSE	Hnrnpk	37	-1.83001	6.81795e-06	0.00240162
sp|Q8VDJ3|VIGLN_MOUSE	Hdlbp	56	-1.83266	2.72033e-06	0.00162029
sp|P17225|PTBP1_MOUSE	Ptbp1	20	-1.88786	9.60991e-06	0.0025988
sp|Q61990|PCBP2_MOUSE	Pcbp2	10	-2.0839	3.44987e-06	0.00162029
sp|Q91Z31|PTBP2_MOUSE	Ptbp2	18	-2.39591	3.1659e-06	0.00162029
sp|Q8C7M3|TRIM9_MOUSE	Trim9	3	2.78636	1.12564e-05	0.0025988
sp|Q8C460|ERI3_MOUSE	Eri3	3	2.17637	0.00336691	0.106786
sp|Q99N91|RM34_MOUSE	Mrpl34	2	2.06891	0.0110042	0.185416
sp|P61804|DAD1_MOUSE	Dad1	2	1.74012	0.00220339	0.0913109
sp|Q8BZ20|PAR12_MOUSE	Parp12	3	1.51248	0.0308215	0.274858
sp|Q9EPU4|CPSF1_MOUSE	Cpsf1	3	1.45935	0.000380405	0.0297772
sp|Q9CRB2|NHP2_MOUSE	Nhp2	3	1.40894	0.0041223	0.113889
sp|Q9R0B7|ZN346_MOUSE	Znf346	2	1.39685	0.0182755	0.209449
sp|P32020|NLTP_MOUSE	Scp2	2	1.38222	0.311032	0.608459
sp|Q69Z36|MEX3B_MOUSE	Mex3b	2	1.22353	0.000346525	0.0287208
sp|Q9CQP0|RM33_MOUSE	Mrpl33	2	1.03719	0.112855	0.421786
sp|P56379|68MP_MOUSE	Mp68	2	1.03513	0.00264956	0.103701
sp|P62311|LSM3_MOUSE	Lsm3	3	0.985202	0.192676	0.532582
sp|Q8R3N6|THOC1_MOUSE	Thoc1	3	0.975955	0.0472863	0.319838
sp|P24369|PPIB_MOUSE	Ppib	2	0.881084	0.224481	0.560159
sp|Q8K003|TMA7_MOUSE	Tma7	2	0.872073	0.0158813	0.209449
sp|P62915|TF2B_MOUSE	Gtf2b	3	0.864035	0.0435162	0.314955
sp|Q9D2E2|TOE1_MOUSE	Toe1	2	0.86308	0.558197	0.771438
sp|Q8K1R3|PNPT1_MOUSE	Pnpt1	2	0.85161	0.019776	0.214341
sp|Q99ME2|WDR6_MOUSE	Wdr6	3	0.805102	0.00402911	0.11354
sp|Q64364|ARF_MOUSE	Cdkn2a	2	0.784707	0.882746	0.957949
sp|Q9JIG8|PRAF2_MOUSE	Praf2	2	0.780117	0.0046434	0.121158
sp|Q8C570|RAE1L_MOUSE	Rae1	3	0.754988	0.0112604	0.185416
sp|Q9WVA3|BUB3_MOUSE	Bub3	2	0.751401	0.0114147	0.185416
sp|Q8CBE3|WDR37_MOUSE	Wdr37	3	0.751103	0.345201	0.635801
sp|P45952|ACADM_MOUSE	Acadm	2	0.743372	0.0332393	0.282134
sp|P62313|LSM6_MOUSE	Lsm6	2	0.741876	0.0335178	0.282794
sp|Q8K209|AGRG1_MOUSE	Adgrg1	2	0.734228	0.0352548	0.288626
sp|Q60722|ITF2_MOUSE	Tcf4	2	0.701731	0.0153285	0.207687
sp|Q505F5|LRC47_MOUSE	Lrrc47	3	0.695318	0.596157	0.799809
sp|Q3UJB9|EDC4_MOUSE	Edc4	3	0.691864	0.100196	0.414828
sp|Q99P91|GPNMB_MOUSE	Gpnmb	2	0.68305	0.0264931	0.264287
sp|Q9CQ48|NUDC2_MOUSE	Nudcd2	3	0.649454	0.0456443	0.319838
sp|A3KFM7|CHD6_MOUSE	Chd6	3	0.646427	0.192904	0.532582
sp|Q00899|TYY1_MOUSE	Yy1	2	0.62235	0.823471	0.929705
sp|Q99N96|RM01_MOUSE	Mrpl1	2	0.610487	0.157834	0.493099
sp|Q9D823|RL37_MOUSE	Rpl37	3	0.607245	0.523639	0.757554
sp|Q80VI1|TRI56_MOUSE	Trim56	2	0.600323	0.0021977	0.0913109
sp|P56382|ATP5E_MOUSE	Atp5e	2	0.585276	0.0136665	0.200584
sp|Q8C1E7|T120A_MOUSE	Tmem120a	3	0.576935	0.0214838	0.231074
sp|Q9CQX8|RT36_MOUSE	Mrps36	2	0.554788	0.0191106	0.209449
sp|P17751|TPIS_MOUSE	Tpi1	2	0.54524	0.572539	0.782167
sp|P97376|FRG1_MOUSE	Frg1	3	0.532798	0.0355826	0.288626
sp|P97807|FUMH_MOUSE	Fh	2	0.528662	0.234196	0.560159
sp|P63154|CRNL1_MOUSE	Crnkl1	2	0.520325	0.18998	0.531665
sp|P17665|COX7C_MOUSE	Cox7c	3	0.507825	0.0248057	0.255118
sp|Q8C3X8|LMF2_MOUSE	Lmf2	3	0.507389	0.00878994	0.168613
sp|P60060|SC61G_MOUSE	Sec61g	3	0.488033	0.0824293	0.380796
sp|Q78IK2|USMG5_MOUSE	Usmg5	3	0.485509	0.0655321	0.356597
sp|Q8BRH0|TMTC3_MOUSE	Tmtc3	3	0.481887	0.449275	0.718533
sp|Q9D824|FIP1_MOUSE	Fip1l1	2	0.469702	0.119202	0.427874
sp|A6X919|D19L1_MOUSE	Dpy19l1	2	0.453948	0.135387	0.456363
sp|Q05512|MARK2_MOUSE	Mark2	3	0.449348	0.106634	0.415047
sp|Q8BHL3|TB10B_MOUSE	Tbc1d10b	2	0.447793	0.0140836	0.202488
sp|Q91ZX7|LRP1_MOUSE	Lrp1	2	0.440057	0.66504	0.839642
sp|O88796|RPP30_MOUSE	Rpp30	3	0.438914	0.141299	0.467188
sp|Q02526|ZFP41_MOUSE	Zfp41	2	0.427464	0.393782	0.671255
sp|Q9DB72|BTBDH_MOUSE	Btbd17	2	0.427349	0.273628	0.584185
sp|Q9CR88|RT14_MOUSE	Mrps14	3	0.411983	0.744498	0.890491
sp|Q8K194|SNR27_MOUSE	Snrnp27	3	0.389323	0.532024	0.760265
sp|Q80X85|RT07_MOUSE	Mrps7	3	0.387064	0.547427	0.769018
sp|Q9Z103|ADNP_MOUSE	Adnp	2	0.379473	0.772418	0.903657
sp|Q9R0P6|SC11A_MOUSE	Sec11a	3	0.378674	0.0731258	0.363938
sp|Q9ERS2|NDUAD_MOUSE	Ndufa13	3	0.376506	0.240363	0.565457
sp|Q8BKE6|CP20A_MOUSE	Cyp20a1	3	0.376287	0.331862	0.625124
sp|Q812A2|SRGP3_MOUSE	Srgap3	2	0.365323	0.177221	0.515917
sp|P69566|RANB9_MOUSE	Ranbp9	2	0.357855	0.751915	0.895561
sp|P99028|QCR6_MOUSE	Uqcrh	2	0.356146	0.0545095	0.33984
sp|Q5ND52|MRM3_MOUSE	Mrm3	3	0.341448	0.172385	0.507416
sp|P00405|COX2_MOUSE	Mtco2	3	0.333493	0.0483088	0.320485
sp|Q9EQI8|RM46_MOUSE	Mrpl46	3	0.330663	0.238917	0.565457
sp|P70288|HDAC2_MOUSE	Hdac2	2	0.325565	0.465081	0.723325
sp|Q6A065|CE170_MOUSE	Cep170	3	0.313448	0.912683	0.967044
sp|Q91V81|RBM42_MOUSE	Rbm42	3	0.307317	0.397263	0.671962
sp|Q9CQ54|NDUC2_MOUSE	Ndufc2	2	0.305014	0.164919	0.50371
sp|P39876|TIMP3_MOUSE	Timp3	2	0.30477	0.0292202	0.272641
sp|P48771|CX7A2_MOUSE	Cox7a2	2	0.301684	0.0519211	0.332531
sp|Q61137|ASTN1_MOUSE	Astn1	2	0.295911	0.405651	0.677206
sp|Q9D6J6|NDUV2_MOUSE	Ndufv2	3	0.290838	0.0718565	0.361592
sp|P08043|ZFP2_MOUSE	Zfp2	3	0.288925	0.967489	0.995273
sp|Q9DBE8|ALG2_MOUSE	Alg2	2	0.284291	0.344542	0.635419
sp|Q8R1I1|QCR9_MOUSE	Uqcr10	2	0.283736	0.242883	0.565457
sp|Q61074|PPM1G_MOUSE	Ppm1g	2	0.280477	0.402706	0.674688
sp|Q9D8X2|CC124_MOUSE	Ccdc124	3	0.277498	0.0743248	0.363938
sp|Q924T2|RT02_MOUSE	Mrps2	2	0.277234	0.0886096	0.39167
sp|Q80UM7|MOGS_MOUSE	Mogs	3	0.276016	0.129869	0.445219
sp|Q5U4C3|SFR19_MOUSE	Scaf1	3	0.273336	0.147251	0.46839
sp|Q9D328|TM35A_MOUSE	Tmem35a	2	0.268496	0.193472	0.532582
sp|Q9QXB9|DRG2_MOUSE	Drg2	3	0.265987	0.189055	0.531665
sp|P46935|NEDD4_MOUSE	Nedd4	2	0.259231	0.49916	0.743464
sp|Q9R0L6|PCM1_MOUSE	Pcm1	3	0.25085	0.935444	0.979228
sp|Q6PD26|PIGS_MOUSE	Pigs	3	0.250807	0.281216	0.589634
sp|Q9D7G0|PRPS1_MOUSE	Prps1	2	0.24798	0.551371	0.769554
sp|O08709|PRDX6_MOUSE	Prdx6	2	0.230866	0.190945	0.531702
sp|Q4QQM4|P5I11_MOUSE	Trp53i11	3	0.228908	0.626343	0.827143
sp|Q91VK4|ITM2C_MOUSE	Itm2c	3	0.228889	0.198979	0.540157
sp|B9EJ86|OSBL8_MOUSE	Osbpl8	3	0.227147	0.559519	0.771438
sp|O35643|AP1B1_MOUSE	Ap1b1	3	0.221826	0.956936	0.987782
sp|Q3TIV5|ZC3HF_MOUSE	Zc3h15	3	0.216601	0.147133	0.46839
sp|Q31125|S39A7_MOUSE	Slc39a7	3	0.213964	0.770308	0.903657
sp|O35680|RT12_MOUSE	Mrps12	3	0.213845	0.165287	0.50371
sp|Q7TPD0|INT3_MOUSE	Ints3	2	0.208931	0.220437	0.559571
sp|Q3UVX5|GRM5_MOUSE	Grm5	3	0.204026	0.45883	0.722212
sp|P26638|SYSC_MOUSE	Sars	3	0.201982	0.640862	0.829782
sp|Q9D7B7|GPX8_MOUSE	Gpx8	2	0.194456	0.986547	0.997878
sp|Q8BHS3|RBM22_MOUSE	Rbm22	3	0.181785	0.143253	0.46839
sp|Q9D0G0|RT30_MOUSE	Mrps30	3	0.176126	0.638711	0.829782
sp|Q9CYL5|GAPR1_MOUSE	Glipr2	2	0.175809	0.296689	0.60258
sp|Q9CQS8|SC61B_MOUSE	Sec61b	2	0.175031	0.512263	0.7516
sp|P47878|IBP3_MOUSE	Igfbp3	2	0.17468	0.628448	0.827675
sp|Q8BGH2|SAM50_MOUSE	Samm50	2	0.168829	0.429249	0.697015
sp|P29758|OAT_MOUSE	Oat	3	0.166815	0.276848	0.584944
sp|Q7TMF3|NDUAC_MOUSE	Ndufa12	3	0.165713	0.30979	0.608459
sp|Q8VBT0|TMX1_MOUSE	Tmx1	2	0.160145	0.16952	0.507081
sp|Q8BWW4|LARP4_MOUSE	Larp4	3	0.157472	0.2338	0.560159
sp|Q8BNV1|TRM2A_MOUSE	Trmt2a	3	0.156218	0.937263	0.979348
sp|O55135|IF6_MOUSE	Eif6	3	0.154284	0.281666	0.5897
sp|P56671|MAZ_MOUSE	Maz	3	0.152942	0.657102	0.836658
sp|Q8CHY6|P66A_MOUSE	Gatad2a	2	0.147729	0.201648	0.540157
sp|Q9CWZ3|RBM8A_MOUSE	Rbm8a	2	0.144005	0.295018	0.60258
sp|Q8CBY3|LENG8_MOUSE	Leng8	2	0.142156	0.515452	0.753512
sp|O35144|TERF2_MOUSE	Terf2	3	0.136711	0.264555	0.578818
sp|Q01730|RSU1_MOUSE	Rsu1	3	0.135789	0.675852	0.846467
sp|O35382|EXOC4_MOUSE	Exoc4	3	0.135645	0.149886	0.474582
sp|Q78ZA7|NP1L4_MOUSE	Nap1l4	2	0.133651	0.271725	0.584061
sp|Q62511|ZFP91_MOUSE	Zfp91	2	0.13085	0.449042	0.718533
sp|Q9QZD8|DIC_MOUSE	Slc25a10	2	0.129562	0.328874	0.623239
sp|Q9R1J0|NSDHL_MOUSE	Nsdhl	2	0.126947	0.37547	0.661261
sp|Q9R118|HTRA1_MOUSE	Htra1	3	0.120017	0.64714	0.832211
sp|Q9WTU0|PHF2_MOUSE	Phf2	3	0.118483	0.165229	0.50371
sp|O70152|DPM1_MOUSE	Dpm1	3	0.113244	0.499817	0.743656
sp|Q80UU9|PGRC2_MOUSE	Pgrmc2	3	0.110496	0.40091	0.674084
sp|Q5U4E2|REPI1_MOUSE	Repin1	3	0.109045	0.909776	0.967044
sp|Q9CWF2|TBB2B_MOUSE	Tubb2b	2	0.106815	0.3671	0.656136
sp|Q9QY06|MYO9B_MOUSE	Myo9b	3	0.106449	0.54062	0.766332
sp|O35343|IMA3_MOUSE	Kpna4	3	0.106424	0.377183	0.661831
sp|Q9Z2Q5|RM40_MOUSE	Mrpl40	3	0.102552	0.985955	0.997878
sp|Q9JIW9|RALB_MOUSE	Ralb	3	0.102076	0.457404	0.722212
sp|Q8R349|CDC16_MOUSE	Cdc16	2	0.0988154	0.841024	0.937518
sp|Q9CY50|SSRA_MOUSE	Ssr1	2	0.0982468	0.411047	0.682174
sp|Q8VC70|RBMS2_MOUSE	Rbms2	3	0.0975053	0.375601	0.661261
sp|Q9CXW2|RT22_MOUSE	Mrps22	2	0.0955243	0.878723	0.957944
sp|Q6ZWQ7|SPCS3_MOUSE	Spcs3	2	0.0867431	0.548882	0.769554
sp|Q8QZY9|SF3B4_MOUSE	Sf3b4	3	0.0837081	0.913872	0.967166
sp|P23475|XRCC6_MOUSE	Xrcc6	3	0.0816621	0.298768	0.60258
sp|Q8K1E0|STX5_MOUSE	Stx5	3	0.077739	0.66188	0.837734
sp|Q61191|HCFC1_MOUSE	Hcfc1	3	0.074851	0.394282	0.671255
sp|P83940|ELOC_MOUSE	Eloc	3	0.0720089	0.867007	0.951412
sp|Q8BGZ4|CDC23_MOUSE	Cdc23	3	0.0669423	0.818531	0.927844
sp|P97760|RPB3_MOUSE	Polr2c	3	0.0582515	0.307929	0.608459
sp|Q99KU0|VMP1_MOUSE	Vmp1	2	0.0532529	0.681494	0.848343
sp|Q8C156|CND2_MOUSE	Ncaph	3	0.0510216	0.294396	0.60258
sp|Q9CPQ3|TOM22_MOUSE	Tomm22	3	0.0492618	0.488762	0.737366
sp|P46638|RB11B_MOUSE	Rab11b	2	0.0412892	0.859174	0.947243
sp|Q01320|TOP2A_MOUSE	Top2a	2	0.0396789	0.41291	0.6822
sp|P70399|TP53B_MOUSE	Tp53bp1	2	0.0344561	0.339237	0.628946
sp|Q9WV32|ARC1B_MOUSE	Arpc1b	2	0.0307686	0.541686	0.766986
sp|P49962|SRP09_MOUSE	Srp9	2	0.0287485	0.431125	0.697423
sp|Q6ZQ88|KDM1A_MOUSE	Kdm1a	2	0.0258585	0.58884	0.795884
sp|Q9CRC8|LRC40_MOUSE	Lrrc40	3	0.0242104	0.454473	0.721931
sp|Q99N87|RT05_MOUSE	Mrps5	3	0.0241984	0.822457	0.929705
sp|Q9Z1Q5|CLIC1_MOUSE	Clic1	3	0.0239437	0.5601	0.771438
sp|Q8K3A9|MEPCE_MOUSE	Mepce	2	0.0170967	0.464773	0.723325
sp|O08529|CAN2_MOUSE	Capn2	3	0.014801	0.270154	0.584061
sp|Q9JHW4|SELB_MOUSE	Eefsec	2	0.00488226	0.924662	0.97155
sp|Q60575|KIF1B_MOUSE	Kif1b	2	0.00301458	0.659145	0.837453
sp|Q9D0R2|SYTC_MOUSE	Tars	2	0.00099574	0.610161	0.811846
sp|Q9CQC6|BZW1_MOUSE	Bzw1	2	0.000830178	0.287629	0.595032
sp|P62869|ELOB_MOUSE	Elob	2	0.00033807	0.48896	0.737366
sp|P59326|YTHD1_MOUSE	Ythdf1	2	-0.00103922	0.939336	0.980388
sp|Q8CB77|ELOA1_MOUSE	Eloa	2	-0.00213303	0.842419	0.937518
sp|Q78IK4|MIC27_MOUSE	Apool	2	-0.00346262	0.845046	0.937535
sp|O54781|SRPK2_MOUSE	Srpk2	3	-0.00775465	0.908716	0.967044
sp|Q8BLY1|SMOC1_MOUSE	Smoc1	2	-0.00928757	0.774056	0.903657
sp|P68404|KPCB_MOUSE	Prkcb	2	-0.0095313	0.218432	0.559571
sp|P59708|SF3B6_MOUSE	Sf3b6	3	-0.00968351	0.74816	0.893381
sp|Q61686|CBX5_MOUSE	Cbx5	2	-0.0117488	0.589556	0.795884
sp|P56135|ATPK_MOUSE	Atp5j2	3	-0.0127594	0.686273	0.848954
sp|Q07813|BAX_MOUSE	Bax	2	-0.0215464	0.556511	0.771438
sp|Q9ER00|STX12_MOUSE	Stx12	3	-0.0231629	0.336673	0.628946
sp|O70551|SRPK1_MOUSE	Srpk1	2	-0.0236824	0.680686	0.848343
sp|Q71M36|CSPG5_MOUSE	Cspg5	3	-0.0250729	0.57203	0.782167
sp|Q8K297|GT251_MOUSE	Colgalt1	2	-0.0251926	0.714866	0.866803
sp|E9PVX6|KI67_MOUSE	Mki67	3	-0.0299324	0.736999	0.883772
sp|Q6P9Z1|SMRD3_MOUSE	Smarcd3	2	-0.0398978	0.444389	0.716412
sp|Q9Z1X2|PTSS2_MOUSE	Ptdss2	2	-0.040983	0.827784	0.933522
sp|Q91V41|RAB14_MOUSE	Rab14	3	-0.042044	0.950482	0.986178
sp|P52503|NDUS6_MOUSE	Ndufs6	3	-0.046193	0.412034	0.6822
sp|Q9D287|SPF27_MOUSE	Bcas2	3	-0.0462634	0.77048	0.903657
sp|Q9WUA3|PFKAP_MOUSE	Pfkp	3	-0.0486712	0.661891	0.837734
sp|Q8BHI7|ELOV5_MOUSE	Elovl5	3	-0.049261	0.834945	0.934779
sp|Q6ZWY3|RS27L_MOUSE	Rps27l	2	-0.0527191	0.333287	0.625701
sp|C0HKD8|MFA1A_MOUSE	Mfap1a	3	-0.0535783	0.201141	0.540157
sp|Q9CWX9|DDX47_MOUSE	Ddx47	3	-0.0603774	0.753615	0.896364
sp|Q3U1G5|I20L2_MOUSE	Isg20l2	3	-0.0608828	0.979947	0.995552
sp|P61089|UBE2N_MOUSE	Ube2n	3	-0.066708	0.509576	0.7516
sp|B9EJI9|T229A_MOUSE	Tmem229a	3	-0.0672232	0.651217	0.834869
sp|A2RSY6|TRM1L_MOUSE	Trmt1l	2	-0.0681064	0.740999	0.887813
sp|Q9CRY7|GDPD1_MOUSE	Gdpd1	2	-0.0721049	0.701525	0.858475
sp|Q8JZN5|ACAD9_MOUSE	Acad9	3	-0.072665	0.858627	0.947243
sp|Q9CZU3|SK2L2_MOUSE	Skiv2l2	2	-0.0749202	0.589711	0.795884
sp|Q99J95|CDK9_MOUSE	Cdk9	2	-0.0895984	0.810717	0.924293
sp|Q9R020|ZRAB2_MOUSE	Zranb2	2	-0.0905225	0.495494	0.740825
sp|Q61070|EI24_MOUSE	Ei24	3	-0.0906796	0.537551	0.765604
sp|P61028|RAB8B_MOUSE	Rab8b	3	-0.0925387	0.511444	0.7516
sp|Q8VEH3|ARL8A_MOUSE	Arl8a	3	-0.0995539	0.887196	0.960233
sp|Q8BM55|TM214_MOUSE	Tmem214	3	-0.100234	0.367089	0.656136
sp|P47802|MTX1_MOUSE	Mtx1	2	-0.102366	0.409355	0.680166
sp|Q6PGH1|BUD31_MOUSE	Bud31	2	-0.114475	0.736352	0.883748
sp|Q9DBG7|SRPRA_MOUSE	Srpra	3	-0.116445	0.834402	0.934779
sp|Q9D1G2|PMVK_MOUSE	Pmvk	2	-0.117316	0.513058	0.7516
sp|B2RVL6|ZCH24_MOUSE	Zcchc24	3	-0.13006	0.257607	0.573409
sp|Q9D6U8|F162A_MOUSE	Fam162a	3	-0.136986	0.220142	0.559571
sp|P35282|RAB21_MOUSE	Rab21	2	-0.144474	0.768399	0.903657
sp|P55258|RAB8A_MOUSE	Rab8a	2	-0.145929	0.24305	0.565457
sp|Q9QYF9|NDRG3_MOUSE	Ndrg3	3	-0.153926	0.446942	0.717547
sp|P43277|H13_MOUSE	Hist1h1d	3	-0.157727	0.215293	0.559571
sp|Q9CWK8|SNX2_MOUSE	Snx2	2	-0.164127	0.475658	0.728481
sp|Q8C4J7|TBL3_MOUSE	Tbl3	2	-0.171951	0.937003	0.979348
sp|Q8CFQ3|AQR_MOUSE	Aqr	3	-0.173962	0.70398	0.858794
sp|Q9D0T1|NH2L1_MOUSE	Snu13	3	-0.175643	0.559252	0.771438
sp|Q9D903|EBP2_MOUSE	Ebna1bp2	3	-0.179831	0.396466	0.671962
sp|Q9EQ61|PESC_MOUSE	Pes1	2	-0.183804	0.887313	0.960233
sp|Q8VCH8|UBXN4_MOUSE	Ubxn4	3	-0.185712	0.705176	0.85951
sp|O08740|RPB11_MOUSE	Polr2j	2	-0.187914	0.185744	0.529784
sp|P61164|ACTZ_MOUSE	Actr1a	3	-0.191002	0.0744125	0.363938
sp|P61082|UBC12_MOUSE	Ube2m	3	-0.191066	0.108789	0.417494
sp|P70257|NFIX_MOUSE	Nfix	3	-0.194525	0.267285	0.581652
sp|Q9DBL1|ACDSB_MOUSE	Acadsb	3	-0.195347	0.430566	0.697319
sp|O70311|NMT2_MOUSE	Nmt2	3	-0.196473	0.771911	0.903657
sp|P19157|GSTP1_MOUSE	Gstp1	3	-0.200902	0.98124	0.995552
sp|Q6P2L7|CASC4_MOUSE	Casc4	3	-0.206298	0.390831	0.671255
sp|Q8R2Y8|PTH2_MOUSE	Ptrh2	3	-0.210699	0.453929	0.721931
sp|Q9D7N3|RT09_MOUSE	Mrps9	3	-0.22244	0.223283	0.559571
sp|Q9CQ22|LTOR1_MOUSE	Lamtor1	2	-0.229151	0.141582	0.467188
sp|Q810B6|ANFY1_MOUSE	Ankfy1	2	-0.23702	0.143379	0.46839
sp|Q9Z0X1|AIFM1_MOUSE	Aifm1	2	-0.240906	0.640628	0.829782
sp|P63168|DYL1_MOUSE	Dynll1	2	-0.242219	0.391806	0.671255
sp|Q9CQS2|NOP10_MOUSE	Nop10	3	-0.242962	0.0466899	0.319838
sp|Q9CWJ9|PUR9_MOUSE	Atic	2	-0.245076	0.899503	0.96527
sp|Q61550|RAD21_MOUSE	Rad21	3	-0.24876	0.470545	0.72631
sp|Q9ET30|TM9S3_MOUSE	Tm9sf3	3	-0.250623	0.703109	0.858475
sp|Q6GSS7|H2A2A_MOUSE	Hist2h2aa1	2	-0.252227	0.793011	0.916157
sp|Q8CFA2|GCST_MOUSE	Amt	2	-0.254252	0.219934	0.559571
sp|P05213|TBA1B_MOUSE	Tuba1b	2	-0.25547	0.123923	0.436519
sp|Q8K4Z5|SF3A1_MOUSE	Sf3a1	3	-0.256828	0.517702	0.754177
sp|Q8BH59|CMC1_MOUSE	Slc25a12	3	-0.258844	0.543939	0.767177
sp|Q3TDN2|FAF2_MOUSE	Faf2	2	-0.265741	0.218424	0.559571
sp|P63321|RALA_MOUSE	Rala	2	-0.278278	0.766989	0.903657
sp|Q8BZR9|NCBP3_MOUSE	Ncbp3	2	-0.284461	0.641562	0.829782
sp|Q9D1G1|RAB1B_MOUSE	Rab1b	2	-0.288102	0.726807	0.876607
sp|Q9DBD5|PELP1_MOUSE	Pelp1	3	-0.288192	0.605646	0.809634
sp|Q91WK2|EIF3H_MOUSE	Eif3h	3	-0.295396	0.693218	0.853797
sp|Q60960|IMA5_MOUSE	Kpna1	2	-0.295871	0.222208	0.559571
sp|Q61749|EI2BD_MOUSE	Eif2b4	3	-0.316493	0.0461258	0.319838
sp|Q99KV1|DJB11_MOUSE	Dnajb11	2	-0.323993	0.613364	0.814543
sp|Q8CGY8|OGT1_MOUSE	Ogt	2	-0.324654	0.309322	0.608459
sp|Q9Z1Z0|USO1_MOUSE	Uso1	2	-0.327241	0.147141	0.46839
sp|Q9CXY9|GPI8_MOUSE	Pigk	2	-0.330337	0.245561	0.565457
sp|Q8R0G9|NU133_MOUSE	Nup133	3	-0.332405	0.0709798	0.361235
sp|Q9CPX7|RT16_MOUSE	Mrps16	3	-0.336	0.530116	0.760265
sp|P47740|AL3A2_MOUSE	Aldh3a2	2	-0.338687	0.0573654	0.3469
sp|Q920F6|SMC1B_MOUSE	Smc1b	3	-0.343328	0.483153	0.735165
sp|Q9CYH6|RRS1_MOUSE	Rrs1	2	-0.347706	0.428596	0.697015
sp|Q7TQI3|OTUB1_MOUSE	Otub1	2	-0.348097	0.353663	0.643813
sp|P14576|SRP54_MOUSE	Srp54	3	-0.356509	0.257552	0.573409
sp|P97386|DNLI3_MOUSE	Lig3	2	-0.364339	0.329091	0.623239
sp|Q8BP92|RCN2_MOUSE	Rcn2	3	-0.374534	0.348898	0.638779
sp|Q8K2C9|HACD3_MOUSE	Hacd3	3	-0.375065	0.349085	0.638779
sp|P97801|SMN_MOUSE	Smn1	2	-0.381175	0.277732	0.584944
sp|O09005|DEGS1_MOUSE	Degs1	3	-0.382902	0.0990269	0.413846
sp|P23198|CBX3_MOUSE	Cbx3	2	-0.383891	0.294312	0.60258
sp|P0C0S6|H2AZ_MOUSE	H2afz	2	-0.399239	0.531849	0.760265
sp|Q9Z2A7|DGAT1_MOUSE	Dgat1	2	-0.407716	0.696782	0.856689
sp|P43024|CX6A1_MOUSE	Cox6a1	2	-0.427198	0.905267	0.967044
sp|Q64378|FKBP5_MOUSE	Fkbp5	3	-0.429368	0.112763	0.421786
sp|Q9EQH3|VPS35_MOUSE	Vps35	3	-0.439858	0.490676	0.737847
sp|P47964|RL36_MOUSE	Rpl36	3	-0.469409	0.0117088	0.185416
sp|O35114|SCRB2_MOUSE	Scarb2	2	-0.488477	0.0162474	0.209449
sp|Q9CQD1|RAB5A_MOUSE	Rab5a	2	-0.490626	0.550684	0.769554
sp|O55029|COPB2_MOUSE	Copb2	3	-0.494447	0.0602021	0.349073
sp|Q91VN6|DDX41_MOUSE	Ddx41	2	-0.532177	0.186614	0.530408
sp|O88487|DC1I2_MOUSE	Dync1i2	3	-0.532836	0.439674	0.710436
sp|Q9DBY8|NVL_MOUSE	Nvl	2	-0.536472	0.0159906	0.209449
sp|Q9D023|MPC2_MOUSE	Mpc2	3	-0.538522	0.545383	0.767863
sp|Q91VU0|FAM3C_MOUSE	Fam3c	2	-0.548604	0.063906	0.354389
sp|P52927|HMGA2_MOUSE	Hmga2	2	-0.558177	0.91844	0.969637
sp|Q99KG3|RBM10_MOUSE	Rbm10	3	-0.577428	0.019042	0.209449
sp|Q61166|MARE1_MOUSE	Mapre1	2	-0.585578	0.0316083	0.279368
sp|Q99JY9|ARP3_MOUSE	Actr3	3	-0.610484	0.00531808	0.127003
sp|P62880|GBB2_MOUSE	Gnb2	3	-0.6339	0.0171376	0.209449
sp|P46460|NSF_MOUSE	Nsf	3	-0.642064	0.0307638	0.274858
sp|Q9D6X6|PRS23_MOUSE	Prss23	3	-0.645224	0.133615	0.454743
sp|P48302|EDNRB_MOUSE	Ednrb	2	-0.652189	0.218494	0.559571
sp|Q8R1Q8|DC1L1_MOUSE	Dync1li1	2	-0.653992	0.122205	0.435917
sp|Q3V1H1|CKAP2_MOUSE	Ckap2	2	-0.656461	0.239933	0.565457
sp|Q791T5|MTCH1_MOUSE	Mtch1	3	-0.680855	0.328433	0.623239
sp|Q99LH2|PTSS1_MOUSE	Ptdss1	2	-0.723083	0.637478	0.829782
sp|Q5SUQ9|CTC1_MOUSE	Ctc1	3	-0.737012	0.0787982	0.371326
sp|Q9DAS9|GBG12_MOUSE	Gng12	3	-0.747634	0.0171695	0.209449
sp|P61205|ARF3_MOUSE	Arf3	3	-0.750264	0.0325622	0.282134
sp|Q8C0D4|RHG12_MOUSE	Arhgap12	2	-0.75374	0.246039	0.565457
sp|P68510|1433F_MOUSE	Ywhah	2	-0.76107	0.108483	0.417494
sp|Q91WN1|DNJC9_MOUSE	Dnajc9	3	-0.771997	0.221233	0.559571
sp|P07742|RIR1_MOUSE	Rrm1	2	-0.812712	0.642507	0.829782
sp|A2BE28|LAS1L_MOUSE	Las1l	2	-0.816489	0.35856	0.650208
sp|P68033|ACTC_MOUSE	Actc1	3	-0.823856	0.111907	0.421597
sp|Q8CHP5|PYM1_MOUSE	Pym1	3	-0.847231	0.000251586	0.0227484
sp|P37913|DNLI1_MOUSE	Lig1	2	-0.851576	0.00274657	0.10459
sp|P97393|RHG05_MOUSE	Arhgap5	2	-0.860439	0.0730494	0.363938
sp|Q91WC0|SETD3_MOUSE	Setd3	2	-0.87219	0.065549	0.356597
sp|Q9R0A0|PEX14_MOUSE	Pex14	2	-0.904719	0.125735	0.438517
sp|Q91YR1|TWF1_MOUSE	Twf1	3	-0.912717	0.00485578	0.122655
sp|Q80X82|SYMPK_MOUSE	Sympk	3	-0.916675	0.00110807	0.0678812
sp|Q9JKN6|NOVA1_MOUSE	Nova1	3	-0.941283	0.000177694	0.0197191
sp|Q9WTL7|LYPA2_MOUSE	Lypla2	2	-0.966646	0.111866	0.421597
sp|Q61699|HS105_MOUSE	Hsph1	3	-0.991066	0.000181936	0.0197191
sp|Q9CXW3|CYBP_MOUSE	Cacybp	2	-0.998292	0.00262085	0.103701
sp|O35927|CTND2_MOUSE	Ctnnd2	2	-1.01131	0.206966	0.552301
sp|Q9JKV1|ADRM1_MOUSE	Adrm1	3	-1.01296	0.107652	0.416708
sp|Q62351|TFR1_MOUSE	Tfrc	2	-1.04835	0.00291334	0.10459
sp|Q8BZX4|SREK1_MOUSE	Srek1	3	-1.08237	0.000809067	0.051817
sp|Q5U4D9|THOC6_MOUSE	Thoc6	2	-1.08936	0.130303	0.445625
sp|Q9Z2D6|MECP2_MOUSE	Mecp2	2	-1.18827	0.163477	0.502924
sp|P34022|RANG_MOUSE	Ranbp1	2	-1.36261	0.571176	0.782106
sp|P52912|TIA1_MOUSE	Tia1	3	-1.48005	0.014638	0.204207
sp|Q9CQJ4|RING2_MOUSE	Rnf2	3	-1.67904	0.181568	0.519977
sp|Q9CQI6|COTL1_MOUSE	Cotl1	3	-3.17642	0.0886749	0.39167
sp|Q8R0T2|ZN768_MOUSE	Znf768	2	-4.7306	0.0751824	0.363938
sp|Q6P549|SHIP2_MOUSE	Inppl1	2	-5.20213	0.0116101	0.185416

## Sheet: NFIB 5' UTR vs hybrid RNA raw
NFIB 5' UTR vs hybrid RNA
proteinName	geneName	nbPeptides	log2ratio_5p_PD	pValue_5p_PD	qValue_5p_PD
sp|B2RY56|RBM25_MOUSE	Rbm25	10	1.48722	0.00392541	0.0562375
sp|P42669|PURA_MOUSE	Pura	9	1.25651	0.00108283	0.0268799
sp|G5E829|AT2B1_MOUSE	Atp2b1	3	1.22016	0.0158503	0.113076
sp|Q9DBR7|MYPT1_MOUSE	Ppp1r12a	3	1.20885	0.0513715	0.191089
sp|Q8R3F5|FABD_MOUSE	Mcat	1	1.20528	0.00284887	0.0476168
sp|Q8K003|TMA7_MOUSE	Tma7	6	1.07183	0.0279435	0.148209
sp|Q9QXV1|CBX8_MOUSE	Cbx8	2	1.06816	0.00722315	0.0811304
sp|O88569|ROA2_MOUSE	Hnrnpa2b1	38	1.06126	0.000150064	0.00752466
sp|Q01853|TERA_MOUSE	Vcp	4	1.02705	0.000453412	0.0151569
sp|O35295|PURB_MOUSE	Purb	13	1.02072	0.000577316	0.0184216
sp|Q8R3Q0|SARAF_MOUSE	Saraf	1	0.99934	0.00596791	0.0725963
sp|Q9JMG1|EDF1_MOUSE	Edf1	5	0.993286	0.00588718	0.0725963
sp|O55125|NIPS1_MOUSE	Nipsnap1	3	0.985833	0.031035	0.155618
sp|P09405|NUCL_MOUSE	Ncl	58	0.981187	0.000185629	0.00868742
sp|E9Q4Z2|ACACB_MOUSE	Acacb	1	0.977467	0.000807624	0.0222485
sp|Q9CPP6|NDUA5_MOUSE	Ndufa5	4	0.842402	0.0106048	0.0964839
sp|P84099|RL19_MOUSE	Rpl19	15	0.841417	0.00800888	0.0832923
sp|Q7TMK9|HNRPQ_MOUSE	Syncrip	42	0.83983	0.000199676	0.00881662
sp|Q9D824|FIP1_MOUSE	Fip1l1	2	0.836071	0.0143197	0.109372
sp|Q9R226|KHDR3_MOUSE	Khdrbs3	2	0.831384	0.000987273	0.0256691
sp|O35143|ATIF1_MOUSE	Atpif1	3	0.831092	0.0169737	0.115259
sp|Q922S8|KIF2C_MOUSE	Kif2c	1	0.822764	0.000642839	0.0200566
sp|P49312|ROA1_MOUSE	Hnrnpa1	32	0.813856	0.000709685	0.021386
sp|O35988|SDC4_MOUSE	Sdc4	2	0.812958	0.00552255	0.0716345
sp|P56379|68MP_MOUSE	Mp68	1	0.796997	0.0679312	0.223362
sp|O54879|HMGB3_MOUSE	Hmgb3	6	0.795839	0.000530901	0.0173345
sp|P62274|RS29_MOUSE	Rps29	5	0.79535	0.00599738	0.0725963
sp|Q8BG05|ROA3_MOUSE	Hnrnpa3	36	0.783169	0.000209618	0.00891831
sp|P34884|MIF_MOUSE	Mif	1	0.773887	0.0678038	0.223362
sp|P19783|COX41_MOUSE	Cox4i1	6	0.772994	0.0393156	0.168195
sp|Q80W54|FACE1_MOUSE	Zmpste24	4	0.771537	0.272168	0.489902
sp|P56382|ATP5E_MOUSE	Atp5e	4	0.766903	0.0186447	0.11953
sp|Q9ERS2|NDUAD_MOUSE	Ndufa13	4	0.760328	0.0164501	0.113216
sp|Q05CL8|LARP7_MOUSE	Larp7	2	0.756425	0.987584	0.99278
sp|Q9WTJ4|FIZ1_MOUSE	Fiz1	1	0.754652	0.965636	0.97958
sp|P62858|RS28_MOUSE	Rps28	6	0.753001	0.000255835	0.00997756
sp|P63323|RS12_MOUSE	Rps12	5	0.7448	0.0478974	0.186688
sp|Q9JKB3|YBOX3_MOUSE	Ybx3	7	0.74001	0.0027505	0.0469602
sp|P30681|HMGB2_MOUSE	Hmgb2	13	0.73923	0.00200569	0.0380539
sp|Q3ULD5|MCCB_MOUSE	Mccc2	26	0.737662	0.0175205	0.115487
sp|Q3U186|SYRM_MOUSE	Rars2	3	0.737567	0.000200949	0.00881662
sp|P35762|CD81_MOUSE	Cd81	1	0.733733	0.10008	0.276399
sp|Q62383|SPT6H_MOUSE	Supt6h	2	0.731255	0.0061014	0.0725963
Biognosys|iRT	NA	11	0.730536	0.0843153	0.253326
sp|Q99MN9|PCCB_MOUSE	Pccb	30	0.729912	0.00650682	0.0755006
sp|O08739|AMPD3_MOUSE	Ampd3	5	0.728668	0.0828242	0.250615
sp|Q8BWW4|LARP4_MOUSE	Larp4	2	0.727993	0.0051693	0.0684688
sp|Q921T2|TOIP1_MOUSE	Tor1aip1	4	0.725533	0.019802	0.12273
sp|Q78IK2|USMG5_MOUSE	Usmg5	3	0.723805	0.0122881	0.103308
sp|Q61545|EWS_MOUSE	Ewsr1	4	0.723452	0.00687601	0.0787151
sp|P84102|SERF2_MOUSE	Serf2	2	0.722008	0.0237408	0.134403
sp|Q9CQU3|RER1_MOUSE	Rer1	2	0.721584	0.0693583	0.226846
sp|P51859|HDGF_MOUSE	Hdgf	3	0.720038	0.0093736	0.0908348
sp|Q9CYZ2|TPD54_MOUSE	Tpd52l2	1	0.719367	0.785371	0.884251
sp|P62984|RL40_MOUSE	Uba52	1	0.715159	0.396433	0.603683
sp|Q99ME2|WDR6_MOUSE	Wdr6	3	0.710076	0.00080817	0.0222485
sp|Q9DCJ5|NDUA8_MOUSE	Ndufa8	9	0.708012	0.0154687	0.113076
sp|P18608|HMGN1_MOUSE	Hmgn1	8	0.696364	0.00360915	0.0544865
sp|P57716|NICA_MOUSE	Ncstn	1	0.695556	0.16559	0.38022
sp|Q3TMP8|TM38A_MOUSE	Tmem38a	1	0.694252	0.929897	0.962104
sp|Q99LY9|NDUS5_MOUSE	Ndufs5	6	0.692697	0.0436018	0.177441
sp|Q91YT0|NDUV1_MOUSE	Ndufv1	20	0.689254	0.0143337	0.109372
sp|O55126|NIPS2_MOUSE	Gbas	10	0.683596	0.00728775	0.0812064
sp|Q91ZA3|PCCA_MOUSE	Pcca	53	0.682327	0.00689598	0.0787151
sp|Q78PY7|SND1_MOUSE	Snd1	44	0.67744	0.0491718	0.188112
sp|Q9DD18|DTD1_MOUSE	Dtd1	1	0.673321	0.0145394	0.110342
sp|Q9DB77|QCR2_MOUSE	Uqcrc2	19	0.672738	0.0101175	0.0938733
sp|Q9CPQ1|COX6C_MOUSE	Cox6c	7	0.671305	0.0235164	0.134403
sp|Q8CI11|GNL3_MOUSE	Gnl3	4	0.670737	0.00198508	0.0380539
sp|O70305|ATX2_MOUSE	Atxn2	2	0.666155	0.185637	0.399133
sp|P0CG14|CTF8A_MOUSE	Chtf8	2	0.665598	0.00277614	0.0469602
sp|Q99MR8|MCCA_MOUSE	Mccc1	39	0.664089	0.0513793	0.191089
sp|P24547|IMDH2_MOUSE	Impdh2	4	0.663481	0.0319674	0.156899
sp|Q9CQF3|CPSF5_MOUSE	Nudt21	6	0.662519	0.0248867	0.138777
sp|Q9CY58|PAIRB_MOUSE	Serbp1	17	0.655263	0.0574907	0.202298
sp|Q91WG4|ELP2_MOUSE	Elp2	1	0.654917	0.956397	0.973439
sp|P03930|ATP8_MOUSE	Mtatp8	2	0.647229	0.0844419	0.253326
sp|P63143|KCAB1_MOUSE	Kcnab1	1	0.638171	0.594105	0.750364
sp|P62082|RS7_MOUSE	Rps7	26	0.632879	0.0141284	0.108991
sp|Q62093|SRSF2_MOUSE	Srsf2	11	0.632372	0.0595354	0.206389
sp|Q99LC3|NDUAA_MOUSE	Ndufa10	9	0.631635	0.0159786	0.113076
sp|Q9D1L0|CHCH2_MOUSE	Chchd2	1	0.629558	0.556954	0.726731
sp|Q9EQQ2|YIPF5_MOUSE	Yipf5	1	0.628664	0.702704	0.833171
sp|P99028|QCR6_MOUSE	Uqcrh	5	0.627847	0.014019	0.108744
sp|Q8BHI7|ELOV5_MOUSE	Elovl5	2	0.62623	0.034046	0.16077
sp|P62960|YBOX1_MOUSE	Ybx1	24	0.625806	0.0288203	0.150826
sp|Q9CYX7|RRP15_MOUSE	Rrp15	3	0.623336	0.622549	0.773503
sp|Q06185|ATP5I_MOUSE	Atp5i	4	0.618495	0.022162	0.129246
sp|Q9CQZ5|NDUA6_MOUSE	Ndufa6	5	0.61756	0.0288975	0.150826
sp|P63158|HMGB1_MOUSE	Hmgb1	19	0.612104	0.00240654	0.0434976
sp|Q9D937|CK098_MOUSE	NA	6	0.610781	0.00111891	0.0270854
sp|P54103|DNJC2_MOUSE	Dnajc2	1	0.609807	0.00321042	0.0495322
sp|Q9DB42|ZN593_MOUSE	Znf593	3	0.608945	0.00755064	0.0819351
sp|Q8R1F0|L10K_MOUSE	D8Ertd738e	6	0.607391	0.0014801	0.0329414
sp|P21956|MFGM_MOUSE	Mfge8	3	0.607301	0.00938108	0.0908348
sp|Q9DB20|ATPO_MOUSE	Atp5o	15	0.605641	0.0206948	0.124702
sp|Q03265|ATPA_MOUSE	Atp5a1	46	0.60564	0.0134548	0.108566
sp|Q05920|PYC_MOUSE	Pc	70	0.599556	0.00181929	0.0354762
sp|Q640R3|HECAM_MOUSE	Hepacam	8	0.597715	0.00441653	0.0613941
sp|Q9CQT9|CT024_MOUSE	NA	1	0.597337	0.014885	0.111757
sp|Q91XI1|DUS3L_MOUSE	Dus3l	8	0.595684	0.135103	0.332406
sp|Q8BH59|CMC1_MOUSE	Slc25a12	6	0.594272	0.0138754	0.108744
sp|Q9DBS1|TMM43_MOUSE	Tmem43	1	0.592954	0.0445929	0.180428
sp|P51655|GPC4_MOUSE	Gpc4	3	0.588734	0.00392072	0.0562375
sp|P48771|CX7A2_MOUSE	Cox7a2	3	0.582023	0.0729137	0.230047
sp|Q8K2B3|SDHA_MOUSE	Sdha	21	0.579162	0.00796704	0.0832923
sp|Q8BJ71|NUP93_MOUSE	Nup93	2	0.577571	0.0569488	0.201401
sp|Q9DB41|GHC2_MOUSE	Slc25a18	16	0.577198	0.0116336	0.100241
sp|P56183|RRP1_MOUSE	Rrp1	1	0.575808	0.621605	0.773014
sp|Q8CGK3|LONM_MOUSE	Lonp1	6	0.575335	0.00631613	0.0738987
sp|Q80U78|PUM1_MOUSE	Pum1	4	0.575134	0.00229393	0.0423773
sp|Q9JHW4|SELB_MOUSE	Eefsec	4	0.574584	0.0483203	0.186926
sp|Q8R1I1|QCR9_MOUSE	Uqcr10	2	0.571354	0.0324509	0.157651
sp|P56480|ATPB_MOUSE	Atp5b	30	0.571138	0.0126364	0.10435
sp|P59017|B2L13_MOUSE	Bcl2l13	1	0.570682	0.178699	0.3908
sp|P62270|RS18_MOUSE	Rps18	23	0.566078	0.000737655	0.021386
sp|Q9QZH6|ECSIT_MOUSE	Ecsit	1	0.564342	0.0100076	0.0936709
sp|Q9D8B3|CHM4B_MOUSE	Chmp4b	3	0.562625	0.016195	0.113076
sp|P09602|HMGN2_MOUSE	Hmgn2	10	0.562444	0.227102	0.441621
sp|Q9R0U0|SRS10_MOUSE	Srsf10	7	0.561017	0.00247288	0.0439484
sp|Q9D880|TIM50_MOUSE	Timm50	3	0.560104	0.0633594	0.216403
sp|Q3UHX2|HAP28_MOUSE	Pdap1	3	0.559098	0.37372	0.585607
sp|Q9EQI8|RM46_MOUSE	Mrpl46	2	0.558003	0.00154999	0.0334798
sp|Q9QZF2|GPC1_MOUSE	Gpc1	2	0.555333	0.20148	0.412358
sp|P80313|TCPH_MOUSE	Cct7	15	0.555231	0.0320238	0.156899
sp|P19536|COX5B_MOUSE	Cox5b	6	0.553021	0.0260098	0.142648
sp|Q8VE97|SRSF4_MOUSE	Srsf4	7	0.552598	0.0486203	0.187436
sp|P63001|RAC1_MOUSE	Rac1	6	0.551601	0.0077033	0.0819351
sp|Q9CZW5|TOM70_MOUSE	Tomm70	9	0.545099	0.00562492	0.0716345
sp|Q8BGS1|E41L5_MOUSE	Epb41l5	1	0.542611	0.199316	0.410118
sp|Q9CR68|UCRI_MOUSE	Uqcrfs1	14	0.541099	0.0218433	0.128318
sp|P52503|NDUS6_MOUSE	Ndufs6	4	0.540422	0.0489452	0.187757
sp|P12787|COX5A_MOUSE	Cox5a	5	0.540011	0.0124325	0.103828
sp|Q9D0M3|CY1_MOUSE	Cyc1	10	0.539631	0.0537858	0.19513
sp|C0HK79|ARXS1_MOUSE	Arxes1	1	0.538538	0.00098336	0.0256691
sp|Q9D0G0|RT30_MOUSE	Mrps30	5	0.538442	0.0346962	0.16077
sp|Q70FJ1|AKAP9_MOUSE	Akap9	2	0.538438	0.511826	0.693633
sp|Q9D6R2|IDH3A_MOUSE	Idh3a	11	0.536807	0.0015016	0.0329414
sp|Q8BP92|RCN2_MOUSE	Rcn2	5	0.536216	0.0417741	0.174038
sp|P53994|RAB2A_MOUSE	Rab2a	4	0.531051	0.0172895	0.115428
sp|Q8BNV1|TRM2A_MOUSE	Trmt2a	6	0.527882	0.021477	0.127615
sp|Q5XKN4|JAGN1_MOUSE	Jagn1	1	0.52752	0.375432	0.586326
sp|Q99LH2|PTSS1_MOUSE	Ptdss1	2	0.526846	0.274358	0.491325
sp|Q9CQP0|RM33_MOUSE	Mrpl33	3	0.525534	0.0101629	0.0938733
sp|P17095|HMGA1_MOUSE	Hmga1	6	0.522381	0.00756	0.0819351
sp|Q8BRH0|TMTC3_MOUSE	Tmtc3	3	0.521126	0.301999	0.519972
sp|Q921G7|ETFD_MOUSE	Etfdh	6	0.519605	0.034048	0.16077
sp|O55022|PGRC1_MOUSE	Pgrmc1	5	0.518018	0.123993	0.315374
sp|Q505F5|LRC47_MOUSE	Lrrc47	7	0.516704	0.0849705	0.253636
sp|P63276|RS17_MOUSE	Rps17	14	0.516004	0.0117091	0.100241
sp|P56135|ATPK_MOUSE	Atp5j2	4	0.51518	0.00867359	0.0888885
sp|Q9CRB9|MIC19_MOUSE	Chchd3	12	0.515048	0.0337476	0.16077
sp|P05064|ALDOA_MOUSE	Aldoa	18	0.514976	0.143796	0.345702
sp|P14131|RS16_MOUSE	Rps16	19	0.514907	0.001482	0.0329414
sp|Q9Z2A7|DGAT1_MOUSE	Dgat1	2	0.514712	0.781436	0.883363
sp|P63325|RS10_MOUSE	Rps10	23	0.51397	0.0199016	0.12273
sp|O35680|RT12_MOUSE	Mrps12	2	0.513241	0.585234	0.745524
sp|B2RS91|RRN3_MOUSE	Rrn3	1	0.512888	0.00889466	0.0892007
sp|P00405|COX2_MOUSE	Mtco2	3	0.51136	0.0187825	0.119867
sp|Q8C9B9|DIDO1_MOUSE	Dido1	2	0.509499	0.0394132	0.168195
sp|Q8BKI2|TNR6B_MOUSE	Tnrc6b	3	0.509264	0.0452938	0.181693
sp|P47738|ALDH2_MOUSE	Aldh2	4	0.507947	0.0373927	0.165398
sp|Q62351|TFR1_MOUSE	Tfrc	1	0.506603	0.503995	0.686999
sp|Q9D8X2|CC124_MOUSE	Ccdc124	3	0.506476	0.467481	0.66172
sp|P50544|ACADV_MOUSE	Acadvl	10	0.505483	0.0174292	0.115428
sp|Q9CR61|NDUB7_MOUSE	Ndufb7	2	0.504586	0.0640912	0.216403
sp|Q6PCP5|MFF_MOUSE	Mff	2	0.501792	0.827831	0.909388
sp|O35129|PHB2_MOUSE	Phb2	20	0.499681	0.00885813	0.0892007
sp|Q99JB2|STML2_MOUSE	Stoml2	8	0.499367	0.0189163	0.120174
sp|P80317|TCPZ_MOUSE	Cct6a	22	0.497948	0.0130643	0.106641
sp|P62267|RS23_MOUSE	Rps23	13	0.497087	0.00308959	0.0489805
sp|Q9D0D4|DIM1_MOUSE	Dimt1	2	0.495924	0.136695	0.334779
sp|P05063|ALDOC_MOUSE	Aldoc	20	0.495254	0.155476	0.363813
sp|Q6PFD9|NUP98_MOUSE	Nup98	2	0.494347	0.00374198	0.0553025
sp|Q80VI1|TRI56_MOUSE	Trim56	4	0.492745	0.0358355	0.1623
sp|P60867|RS20_MOUSE	Rps20	8	0.49209	0.0410638	0.172615
sp|P42932|TCPQ_MOUSE	Cct8	25	0.491781	0.0294011	0.151206
sp|Q9D2E2|TOE1_MOUSE	Toe1	2	0.489392	0.57604	0.7417
sp|P28661|SEPT4_MOUSE	Septin04	2	0.488958	0.284215	0.505357
sp|Q8CGC6|RBM28_MOUSE	Rbm28	6	0.488365	0.0730884	0.230081
sp|Q9DCW4|ETFB_MOUSE	Etfb	6	0.486885	0.00294349	0.0486194
sp|Q6PDM2|SRSF1_MOUSE	Srsf1	20	0.486866	0.00626226	0.0738841
sp|A2AJQ3|D19L4_MOUSE	Dpy19l4	2	0.486625	0.53076	0.70768
sp|Q9Z2Q5|RM40_MOUSE	Mrpl40	2	0.48655	0.0111824	0.0987426
sp|Q9D0M5|DYL2_MOUSE	Dynll2	1	0.486122	0.47942	0.672116
sp|P97450|ATP5J_MOUSE	Atp5j	5	0.481363	0.0178622	0.117189
sp|Q91W50|CSDE1_MOUSE	Csde1	18	0.478342	0.0173882	0.115428
sp|Q9DAS9|GBG12_MOUSE	Gng12	4	0.477682	0.0341723	0.16077
sp|P11983|TCPA_MOUSE	Tcp1	20	0.47673	0.0131594	0.106796
sp|P31648|SC6A1_MOUSE	Slc6a1	1	0.475584	0.0271494	0.14669
sp|P10637|TAU_MOUSE	Mapt	2	0.475471	0.0139456	0.108744
sp|Q8R4R6|NUP53_MOUSE	Nup35	3	0.473496	0.00396637	0.0562503
sp|P17665|COX7C_MOUSE	Cox7c	4	0.47225	0.00789384	0.0832923
sp|Q8BMS1|ECHA_MOUSE	Hadha	50	0.470538	0.00476638	0.0656078
sp|O35874|SATT_MOUSE	Slc1a4	2	0.468799	0.119501	0.30729
sp|A2ASQ1|AGRIN_MOUSE	Agrn	7	0.468295	0.00755964	0.0819351
sp|Q8VDN2|AT1A1_MOUSE	Atp1a1	5	0.46625	0.0353966	0.162263
sp|Q8CCK0|H2AW_MOUSE	H2afy2	3	0.465719	0.0370155	0.164984
sp|Q5SUF2|LC7L3_MOUSE	Luc7l3	12	0.464402	0.0156127	0.113076
sp|P26443|DHE3_MOUSE	Glud1	31	0.464302	0.165737	0.38022
sp|Q9CQA3|SDHB_MOUSE	Sdhb	10	0.464027	0.0401799	0.170422
sp|Q8BH95|ECHM_MOUSE	Echs1	5	0.463173	0.00985272	0.0928404
sp|Q8BMJ3|IF1AX_MOUSE	Eif1ax	3	0.463079	0.0284825	0.149773
sp|P62900|RL31_MOUSE	Rpl31	12	0.462174	0.00885069	0.0892007
sp|P38647|GRP75_MOUSE	Hspa9	40	0.461022	0.00209287	0.0391785
sp|Q8BKE6|CP20A_MOUSE	Cyp20a1	1	0.460992	0.89053	0.939546
sp|Q9CYI4|LUC7L_MOUSE	Luc7l	11	0.460779	0.00509094	0.0680732
sp|Q7TNC4|LC7L2_MOUSE	Luc7l2	23	0.458847	0.00379977	0.0555716
sp|Q3TBW2|RM10_MOUSE	Mrpl10	1	0.456076	0.0359725	0.162397
sp|Q8VE37|RCC1_MOUSE	Rcc1	3	0.45508	0.0389315	0.168195
sp|O35927|CTND2_MOUSE	Ctnnd2	2	0.453918	0.247472	0.465358
sp|Q3TWW8|SRSF6_MOUSE	Srsf6	14	0.453067	0.0195416	0.12273
sp|Q8VEM8|MPCP_MOUSE	Slc25a3	14	0.452928	0.0242292	0.136618
sp|P83882|RL36A_MOUSE	Rpl36a	11	0.452898	0.118197	0.305053
sp|P49070|CAMLG_MOUSE	Camlg	1	0.452597	0.182335	0.39567
sp|Q9Z1P6|NDUA7_MOUSE	Ndufa7	9	0.451788	0.0419108	0.174091
sp|Q99JY0|ECHB_MOUSE	Hadhb	33	0.450528	0.00342878	0.0523261
sp|Q6PAL1|DRAXI_MOUSE	Draxin	1	0.450325	0.405399	0.612681
sp|P51174|ACADL_MOUSE	Acadl	5	0.450244	0.0194708	0.12273
sp|P62889|RL30_MOUSE	Rpl30	12	0.447528	0.00548939	0.0716345
sp|Q5SS80|DHR13_MOUSE	Dhrs13	4	0.447437	0.01356	0.108734
sp|Q924T2|RT02_MOUSE	Mrps2	2	0.445959	0.0162688	0.113076
sp|Q9CQQ7|AT5F1_MOUSE	Atp5f1	11	0.44566	0.139963	0.340569
sp|Q9D8B4|NDUAB_MOUSE	Ndufa11	1	0.445392	0.108585	0.28847
sp|P62849|RS24_MOUSE	Rps24	8	0.445039	0.0205337	0.124264
sp|P80316|TCPE_MOUSE	Cct5	16	0.444842	0.0155011	0.113076
sp|Q8BGT5|ALAT2_MOUSE	Gpt2	5	0.443019	0.116988	0.303673
sp|Q9DCZ4|MIC26_MOUSE	Apoo	2	0.440605	0.0393728	0.168195
sp|Q5SWU9|ACACA_MOUSE	Acaca	104	0.440473	0.0315916	0.156899
sp|P62264|RS14_MOUSE	Rps14	11	0.440188	0.00277241	0.0469602
sp|A2RTL5|RSRC2_MOUSE	Rsrc2	2	0.439529	0.142813	0.34511
sp|Q9WUM5|SUCA_MOUSE	Suclg1	5	0.43917	0.0375383	0.165398
sp|P97461|RS5_MOUSE	Rps5	17	0.437762	0.00436233	0.0612471
sp|Q8K209|AGRG1_MOUSE	Adgrg1	4	0.435806	0.0124979	0.103828
sp|Q8QZT1|THIL_MOUSE	Acat1	18	0.434715	0.0727592	0.230047
sp|Q80U58|PUM2_MOUSE	Pum2	2	0.434038	0.698326	0.829484
sp|Q99JR1|SFXN1_MOUSE	Sfxn1	12	0.433735	0.0636334	0.216403
sp|A2AN08|UBR4_MOUSE	Ubr4	3	0.433129	0.0695834	0.226846
sp|Q9D0R4|DDX56_MOUSE	Ddx56	1	0.431947	0.271084	0.489513
sp|P53395|ODB2_MOUSE	Dbt	5	0.431823	0.0199306	0.12273
sp|Q923D5|WBP11_MOUSE	Wbp11	5	0.431257	0.00599839	0.0725963
sp|Q8BJ90|ZN771_MOUSE	Znf771	3	0.430742	0.148339	0.353595
sp|Q9DC51|GNAI3_MOUSE	Gnai3	1	0.430085	0.0110528	0.0987426
sp|P55258|RAB8A_MOUSE	Rab8a	2	0.425879	0.171842	0.383572
sp|Q91V41|RAB14_MOUSE	Rab14	2	0.423507	0.0148269	0.111757
sp|P43274|H14_MOUSE	Hist1h1e	7	0.422737	0.0316836	0.156899
sp|Q8BGD9|IF4B_MOUSE	Eif4b	4	0.422261	0.283431	0.505162
sp|P47915|RL29_MOUSE	Rpl29	6	0.421049	0.608896	0.766031
sp|Q8BFR5|EFTU_MOUSE	Tufm	9	0.420887	0.0221854	0.129246
sp|Q64525|H2B2B_MOUSE	Hist2h2bb	10	0.419809	0.0767403	0.23732
sp|P62862|RS30_MOUSE	Fau	6	0.418981	0.23735	0.453386
sp|P20357|MTAP2_MOUSE	Map2	34	0.418676	0.0996932	0.276399
sp|Q9CQ75|NDUA2_MOUSE	Ndufa2	5	0.417654	0.0297044	0.151313
sp|Q8CGF7|TCRG1_MOUSE	Tcerg1	9	0.416634	0.0504017	0.191089
sp|Q91VD9|NDUS1_MOUSE	Ndufs1	27	0.416584	0.030131	0.152173
sp|Q9CWL8|CTBL1_MOUSE	Ctnnbl1	1	0.416385	0.0937575	0.267552
sp|Q62513|ZN260_MOUSE	Znf260	3	0.415188	0.6949	0.826589
sp|Q9D3D9|ATPD_MOUSE	Atp5d	3	0.413614	0.051381	0.191089
sp|P26645|MARCS_MOUSE	Marcks	9	0.411764	0.21666	0.432089
sp|Q920A7|AFG31_MOUSE	Afg3l1	3	0.409735	0.0251063	0.138777
sp|Q99LB2|DHRS4_MOUSE	Dhrs4	4	0.408838	0.00766594	0.0819351
sp|P62204|CALM_MOUSE	Calm1	4	0.407687	0.162685	0.375058
sp|Q6ZWV7|RL35_MOUSE	Rpl35	12	0.404675	0.0998454	0.276399
sp|Q8CCF0|PRP31_MOUSE	Prpf31	10	0.404325	0.0120453	0.102494
sp|Q9CQX8|RT36_MOUSE	Mrps36	3	0.404107	0.015643	0.113076
sp|Q7TMF3|NDUAC_MOUSE	Ndufa12	4	0.403057	0.136858	0.334779
sp|Q8BXK8|AGAP1_MOUSE	Agap1	2	0.401848	0.22273	0.440372
sp|P62852|RS25_MOUSE	Rps25	16	0.401133	0.0422223	0.174868
sp|Q60749|KHDR1_MOUSE	Khdrbs1	13	0.400229	0.0115229	0.100241
sp|P43006|EAA2_MOUSE	Slc1a2	7	0.398764	0.0139463	0.108744
sp|Q9DC71|RT15_MOUSE	Mrps15	3	0.398347	0.039334	0.168195
sp|Q9CZ13|QCR1_MOUSE	Uqcrc1	19	0.396791	0.0171493	0.115428
sp|Q99N93|RM16_MOUSE	Mrpl16	4	0.396785	0.0698406	0.226846
sp|O35737|HNRH1_MOUSE	Hnrnph1	22	0.39667	0.00502826	0.0680732
sp|Q9Z2I0|LETM1_MOUSE	Letm1	6	0.395417	0.0283666	0.149724
sp|Q9Z0X1|AIFM1_MOUSE	Aifm1	2	0.394968	0.0860341	0.255374
sp|Q9CXZ1|NDUS4_MOUSE	Ndufs4	4	0.394691	0.095861	0.272447
sp|Q9D6S7|RRFM_MOUSE	Mrrf	3	0.394005	0.306578	0.524921
sp|Q71M36|CSPG5_MOUSE	Cspg5	2	0.393165	0.0121724	0.102952
sp|Q3UVX5|GRM5_MOUSE	Grm5	3	0.392987	0.0163832	0.113216
sp|Q9DCX2|ATP5H_MOUSE	Atp5h	12	0.392398	0.0501878	0.190958
sp|Q8JZN5|ACAD9_MOUSE	Acad9	5	0.392088	0.0201034	0.122836
sp|P26043|RADI_MOUSE	Rdx	15	0.391143	0.155796	0.363955
sp|Q8BGH2|SAM50_MOUSE	Samm50	2	0.390876	0.0172441	0.115428
sp|A6X919|D19L1_MOUSE	Dpy19l1	2	0.390686	0.169365	0.383334
sp|P62918|RL8_MOUSE	Rpl8	19	0.385673	0.0185594	0.119529
sp|P97351|RS3A_MOUSE	Rps3a	38	0.385588	0.00608103	0.0725963
sp|Q5F2E7|NUFP2_MOUSE	Nufip2	1	0.385178	0.465016	0.660863
sp|Q91WN1|DNJC9_MOUSE	Dnajc9	2	0.383596	0.267126	0.48518
sp|Q8C025|CHPT1_MOUSE	Chpt1	1	0.382908	0.171467	0.383345
sp|Q9Z110|P5CS_MOUSE	Aldh18a1	7	0.382629	0.0127094	0.10435
sp|P80314|TCPB_MOUSE	Cct2	27	0.382017	0.0317206	0.156899
sp|Q91VR2|ATPG_MOUSE	Atp5c1	15	0.381434	0.0203054	0.123415
sp|Q3V009|TMED1_MOUSE	Tmed1	3	0.379086	0.0292942	0.151206
sp|Q8BIF9|ZN787_MOUSE	Znf787	3	0.378726	0.10857	0.28847
sp|Q99LM2|CK5P3_MOUSE	Cdk5rap3	2	0.37857	0.025049	0.138777
sp|Q9CQC7|NDUB4_MOUSE	Ndufb4	5	0.378135	0.011299	0.0991483
sp|Q9JJ80|RPF2_MOUSE	Rpf2	3	0.377078	0.0235539	0.134403
sp|P50136|ODBA_MOUSE	Bckdha	1	0.375874	0.261778	0.480154
sp|P24369|PPIB_MOUSE	Ppib	2	0.374854	0.0994456	0.276399
sp|Q8BK67|RCC2_MOUSE	Rcc2	11	0.373703	0.197059	0.408673
sp|P14094|AT1B1_MOUSE	Atp1b1	3	0.372755	0.0376101	0.165398
sp|A2AAY5|SPD2B_MOUSE	Sh3pxd2b	6	0.372577	0.229838	0.443869
sp|B9EJ86|OSBL8_MOUSE	Osbpl8	2	0.372028	0.0336825	0.16077
sp|P20060|HEXB_MOUSE	Hexb	10	0.370073	0.0271716	0.14669
sp|P08752|GNAI2_MOUSE	Gnai2	17	0.36987	0.169426	0.383334
sp|Q9CYS6|CB072_MOUSE	NA	2	0.368893	0.382909	0.592449
sp|Q9D6J6|NDUV2_MOUSE	Ndufv2	4	0.367812	0.0908486	0.264041
sp|P68433|H31_MOUSE	Hist1h3a	8	0.36587	0.0936688	0.267552
sp|Q9D1N9|RM21_MOUSE	Mrpl21	1	0.365777	0.0856982	0.254916
sp|P62301|RS13_MOUSE	Rps13	10	0.365617	0.0299334	0.15172
sp|P80315|TCPD_MOUSE	Cct4	19	0.365083	0.035596	0.162263
sp|P10126|EF1A1_MOUSE	Eef1a1	37	0.363555	0.115644	0.301791
sp|Q8C5Q4|GRSF1_MOUSE	Grsf1	2	0.362783	0.296078	0.515211
sp|Q80VD1|FA98B_MOUSE	Fam98b	13	0.362733	0.0277364	0.148068
sp|Q3UVK0|ERMP1_MOUSE	Ermp1	8	0.362498	0.116065	0.302328
sp|Q91YU8|SSF1_MOUSE	Ppan	2	0.359534	0.702632	0.833171
sp|P62855|RS26_MOUSE	Rps26	5	0.359325	0.0152546	0.113076
sp|Q8R1A4|DOCK7_MOUSE	Dock7	3	0.359138	0.257461	0.47751
sp|Q8BU03|PWP2_MOUSE	Pwp2	1	0.355945	0.174802	0.384639
sp|Q3TIX9|SNUT2_MOUSE	Usp39	3	0.355443	0.131484	0.328477
sp|P39749|FEN1_MOUSE	Fen1	10	0.354451	0.0327046	0.157791
sp|P63260|ACTG_MOUSE	Actg1	1	0.350615	0.829495	0.909388
sp|P70333|HNRH2_MOUSE	Hnrnph2	8	0.349982	0.142225	0.344878
sp|Q8BMA6|SRP68_MOUSE	Srp68	7	0.349913	0.556301	0.726554
sp|Q9DB15|RM12_MOUSE	Mrpl12	2	0.349417	0.0201227	0.122836
sp|Q6PIE5|AT1A2_MOUSE	Atp1a2	49	0.348649	0.0292376	0.151206
sp|P35486|ODPA_MOUSE	Pdha1	11	0.348519	0.0345885	0.16077
sp|P62242|RS8_MOUSE	Rps8	17	0.346503	0.0267551	0.145597
sp|Q99KI0|ACON_MOUSE	Aco2	17	0.346265	0.0106517	0.0964839
sp|Q80X85|RT07_MOUSE	Mrps7	3	0.345551	0.0611421	0.210918
sp|Q99P91|GPNMB_MOUSE	Gpnmb	2	0.34401	0.0469341	0.184581
sp|Q80X50|UBP2L_MOUSE	Ubap2l	15	0.343428	0.221662	0.438948
sp|Q9D4J7|PHF6_MOUSE	Phf6	10	0.342522	0.0198597	0.12273
sp|P62843|RS15_MOUSE	Rps15	8	0.339455	0.046709	0.184581
sp|P67778|PHB_MOUSE	Phb	11	0.339163	0.0510918	0.191089
sp|P29758|OAT_MOUSE	Oat	4	0.338471	0.0136305	0.108734
sp|Q9D6K8|FUND2_MOUSE	Fundc2	2	0.337873	0.0262435	0.143369
sp|P14231|AT1B2_MOUSE	Atp1b2	6	0.337023	0.925417	0.959591
sp|Q91W92|BORG5_MOUSE	Cdc42ep1	5	0.335939	0.357119	0.566547
sp|Q9DC69|NDUA9_MOUSE	Ndufa9	13	0.335561	0.0182625	0.118159
sp|Q91WM3|U3IP2_MOUSE	Rrp9	2	0.335483	0.173593	0.383819
sp|Q8K194|SNR27_MOUSE	Snrnp27	3	0.333202	0.0508245	0.191089
sp|P19157|GSTP1_MOUSE	Gstp1	2	0.331813	0.683494	0.818023
sp|Q9CQ54|NDUC2_MOUSE	Ndufc2	2	0.331638	0.0523812	0.193259
sp|P62281|RS11_MOUSE	Rps11	23	0.330821	0.00933651	0.0908348
sp|P51881|ADT2_MOUSE	Slc25a5	34	0.329986	0.0106108	0.0964839
sp|O35326|SRSF5_MOUSE	Srsf5	11	0.327866	0.025998	0.142648
sp|Q80UU9|PGRC2_MOUSE	Pgrmc2	2	0.327213	0.0354157	0.162263
sp|Q60870|REEP5_MOUSE	Reep5	3	0.327124	0.594178	0.750364
sp|Q8JZU2|TXTP_MOUSE	Slc25a1	10	0.326545	0.0329137	0.158256
sp|P34022|RANG_MOUSE	Ranbp1	2	0.326464	0.195293	0.40675
sp|Q9JIK9|RT34_MOUSE	Mrps34	1	0.325981	0.270153	0.488783
sp|Q9D1I6|RM14_MOUSE	Mrpl14	4	0.325329	0.0326361	0.157791
sp|Q921N6|DDX27_MOUSE	Ddx27	2	0.323521	0.0814282	0.247994
sp|Q9Z127|LAT1_MOUSE	Slc7a5	1	0.32349	0.107884	0.28847
sp|P62751|RL23A_MOUSE	Rpl23a	18	0.322234	0.0159238	0.113076
sp|P16045|LEG1_MOUSE	Lgals1	5	0.321827	0.283137	0.505162
sp|Q8K3J1|NDUS8_MOUSE	Ndufs8	5	0.321206	0.123221	0.31398
sp|P56671|MAZ_MOUSE	Maz	2	0.320961	0.260009	0.480154
sp|Q9CWX9|DDX47_MOUSE	Ddx47	3	0.319215	0.0740142	0.231439
sp|Q61136|PRP4B_MOUSE	Prpf4b	11	0.319205	0.206531	0.417139
sp|P62908|RS3_MOUSE	Rps3	27	0.31832	0.0437529	0.177541
sp|Q8C7Q4|RBM4_MOUSE	Rbm4	1	0.318015	0.413947	0.617131
sp|P28352|APEX1_MOUSE	Apex1	15	0.318001	0.0428712	0.175603
sp|Q6NV83|SR140_MOUSE	U2surp	14	0.317505	0.16793	0.382671
sp|P56959|FUS_MOUSE	Fus	10	0.316128	0.241656	0.457875
sp|P24788|CD11B_MOUSE	Cdk11b	2	0.315243	0.0160132	0.113076
sp|P43276|H15_MOUSE	Hist1h1b	14	0.314513	0.0555032	0.198389
sp|P47911|RL6_MOUSE	Rpl6	23	0.314502	0.0215418	0.127615
sp|Q9ET30|TM9S3_MOUSE	Tm9sf3	4	0.314201	0.544175	0.718065
sp|Q9CS84|NRX1A_MOUSE	Nrxn1	7	0.314182	0.0918651	0.265388
sp|P47757|CAPZB_MOUSE	Capzb	2	0.312847	0.457069	0.654822
sp|P48302|EDNRB_MOUSE	Ednrb	2	0.308917	0.0534263	0.19513
sp|P46471|PRS7_MOUSE	Psmc2	9	0.3073	0.170644	0.383334
sp|Q9CQ62|DECR_MOUSE	Decr1	8	0.306902	0.350149	0.562885
sp|Q9Z329|ITPR2_MOUSE	Itpr2	11	0.30615	0.0744467	0.232274
sp|Q7TNV0|DEK_MOUSE	Dek	9	0.305885	0.0162628	0.113076
sp|Q9D0B0|SRSF9_MOUSE	Srsf9	13	0.305174	0.0339592	0.16077
sp|Q62186|SSRD_MOUSE	Ssr4	7	0.304615	0.0591279	0.205484
sp|P83741|WNK1_MOUSE	Wnk1	2	0.304518	0.527338	0.706328
sp|Q6ZQI3|MLEC_MOUSE	Mlec	10	0.303655	0.0448993	0.180627
sp|Q31125|S39A7_MOUSE	Slc39a7	2	0.303488	0.0540652	0.195638
sp|Q8BHK1|NIPA1_MOUSE	Nipa1	1	0.302731	0.521894	0.704558
sp|O54734|OST48_MOUSE	Ddost	12	0.301567	0.0234373	0.134403
sp|Q9Z1D1|EIF3G_MOUSE	Eif3g	3	0.30151	0.314632	0.530671
sp|Q9D710|TMX2_MOUSE	Tmx2	7	0.300752	0.0216784	0.127885
sp|Q99L45|IF2B_MOUSE	Eif2s2	13	0.300063	0.100205	0.276399
sp|O35841|API5_MOUSE	Api5	8	0.298644	0.0754733	0.234954
sp|Q80Y17|L2GL1_MOUSE	Llgl1	17	0.295819	0.173372	0.383819
sp|P25206|MCM3_MOUSE	Mcm3	19	0.295517	0.036834	0.164975
sp|Q8C1E7|T120A_MOUSE	Tmem120a	2	0.294497	0.108606	0.28847
sp|P62806|H4_MOUSE	Hist1h4a	15	0.294163	0.0579835	0.203522
sp|Q8R081|HNRPL_MOUSE	Hnrnpl	22	0.292396	0.0659738	0.218975
sp|Q8BX10|PGAM5_MOUSE	Pgam5	9	0.292342	0.0352467	0.162263
sp|P61027|RAB10_MOUSE	Rab10	9	0.29216	0.0661292	0.218975
sp|Q9Z2I8|SUCB2_MOUSE	Suclg2	4	0.292155	0.0758485	0.2356
sp|Q60931|VDAC3_MOUSE	Vdac3	18	0.291997	0.0474481	0.185563
sp|Q9CYH6|RRS1_MOUSE	Rrs1	2	0.291824	0.0701193	0.226846
sp|P14148|RL7_MOUSE	Rpl7	24	0.290001	0.0644167	0.216403
sp|Q9CZX9|EMC4_MOUSE	Emc4	6	0.289213	0.350593	0.562885
sp|Q9Z1X4|ILF3_MOUSE	Ilf3	53	0.286682	0.0812941	0.247994
sp|Q8BSY0|ASPH_MOUSE	Asph	10	0.285982	0.0823575	0.250281
sp|Q9D2G2|ODO2_MOUSE	Dlst	9	0.284391	0.866628	0.932747
sp|P15864|H12_MOUSE	Hist1h1c	21	0.283712	0.0868355	0.255799
sp|P43277|H13_MOUSE	Hist1h1d	3	0.283667	0.0619655	0.213234
sp|Q9D855|QCR7_MOUSE	Uqcrb	9	0.280938	0.101168	0.277965
sp|Q99020|ROAA_MOUSE	Hnrnpab	24	0.280917	0.289955	0.510944
sp|P70404|IDHG1_MOUSE	Idh3g	8	0.280326	0.868969	0.932747
sp|Q64521|GPDM_MOUSE	Gpd2	20	0.279395	0.16186	0.37377
sp|Q9CZX8|RS19_MOUSE	Rps19	19	0.27776	0.0377228	0.165398
sp|Q9JJI8|RL38_MOUSE	Rpl38	7	0.277679	0.0524443	0.193259
sp|P61620|S61A1_MOUSE	Sec61a1	9	0.27637	0.262739	0.480945
sp|Q61335|BAP31_MOUSE	Bcap31	11	0.275846	0.0499544	0.190587
sp|Q8C570|RAE1L_MOUSE	Rae1	3	0.274812	0.0402993	0.170422
sp|Q60597|ODO1_MOUSE	Ogdh	18	0.274633	0.027452	0.147109
sp|Q07417|ACADS_MOUSE	Acads	5	0.27443	0.269363	0.487982
sp|P50580|PA2G4_MOUSE	Pa2g4	15	0.273851	0.106218	0.286238
sp|P48678|LMNA_MOUSE	Lmna	9	0.273545	0.105207	0.284608
sp|Q9CY21|WBS22_MOUSE	Wbscr22	1	0.273071	0.0514469	0.191089
sp|P62830|RL23_MOUSE	Rpl23	14	0.27181	0.367745	0.576925
sp|P62915|TF2B_MOUSE	Gtf2b	2	0.271581	0.0390506	0.168195
sp|Q91WD5|NDUS2_MOUSE	Ndufs2	11	0.271442	0.0710948	0.228938
sp|Q9CR88|RT14_MOUSE	Mrps14	2	0.271357	0.03214	0.156899
sp|Q8VHE0|SEC63_MOUSE	Sec63	14	0.271205	0.561922	0.730498
sp|Q8R050|ERF3A_MOUSE	Gspt1	2	0.27093	0.193649	0.405192
sp|P43275|H11_MOUSE	Hist1h1a	7	0.270914	0.480317	0.672116
sp|P08043|ZFP2_MOUSE	Zfp2	3	0.270615	0.788884	0.885366
sp|P97473|TRBP2_MOUSE	Tarbp2	5	0.270283	0.48063	0.672116
sp|P62880|GBB2_MOUSE	Gnb2	5	0.270254	0.431259	0.628751
sp|P61255|RL26_MOUSE	Rpl26	23	0.268793	0.0401807	0.170422
sp|Q9CR62|M2OM_MOUSE	Slc25a11	10	0.268007	0.0211999	0.126658
sp|Q91YJ3|THYN1_MOUSE	Thyn1	6	0.267269	0.530303	0.70768
sp|Q9Z2I9|SUCB1_MOUSE	Sucla2	12	0.266612	0.060805	0.210272
sp|P80318|TCPG_MOUSE	Cct3	28	0.265518	0.043261	0.176565
sp|Q4QQM4|P5I11_MOUSE	Trp53i11	3	0.265201	0.0589763	0.205466
sp|Q9D7N3|RT09_MOUSE	Mrps9	3	0.265116	0.527264	0.706328
sp|Q99N96|RM01_MOUSE	Mrpl1	3	0.26456	0.114435	0.29975
sp|Q9D051|ODPB_MOUSE	Pdhb	12	0.264449	0.0480017	0.186688
sp|Q9Z2X1|HNRPF_MOUSE	Hnrnpf	14	0.264431	0.0342706	0.16077
sp|Q62376|RU17_MOUSE	Snrnp70	19	0.264075	0.0404349	0.170482
sp|Q9DC16|ERGI1_MOUSE	Ergic1	3	0.263277	0.0531364	0.194787
sp|Q9CQ69|QCR8_MOUSE	Uqcrq	5	0.262398	0.0272693	0.14669
sp|P47955|RLA1_MOUSE	Rplp1	4	0.261963	0.423748	0.622878
sp|Q9QY76|VAPB_MOUSE	Vapb	7	0.258095	0.191079	0.402816
sp|Q9CWK8|SNX2_MOUSE	Snx2	1	0.257495	0.228143	0.441621
sp|Q9D8W5|PSD12_MOUSE	Psmd12	5	0.257164	0.61725	0.771699
sp|Q8CFI7|RPB2_MOUSE	Polr2b	5	0.256668	0.0727952	0.230047
sp|Q9CXY6|ILF2_MOUSE	Ilf2	20	0.255934	0.107139	0.288166
sp|P70670|NACAM_MOUSE	Naca	6	0.255917	0.0357616	0.1623
sp|Q07235|GDN_MOUSE	Serpine2	17	0.255891	0.0656597	0.218738
sp|Q61164|CTCF_MOUSE	Ctcf	11	0.254317	0.160367	0.371542
sp|Q9QYI4|DJB12_MOUSE	Dnajb12	5	0.254242	0.325222	0.542816
sp|Q9CWZ3|RBM8A_MOUSE	Rbm8a	2	0.252698	0.172701	0.383819
sp|Q62425|NDUA4_MOUSE	Ndufa4	6	0.252474	0.117013	0.303673
sp|Q8BU14|SEC62_MOUSE	Sec62	6	0.251862	0.263935	0.482051
sp|Q99JF8|PSIP1_MOUSE	Psip1	17	0.250841	0.152854	0.359477
sp|P43406|ITAV_MOUSE	Itgav	7	0.249548	0.0297454	0.151313
sp|Q9JM63|KCJ10_MOUSE	Kcnj10	5	0.249449	0.0542752	0.195893
sp|Q8R404|MIC13_MOUSE	Mic13	5	0.249276	0.133912	0.33169
sp|O88455|DHCR7_MOUSE	Dhcr7	5	0.248769	0.0296782	0.151313
sp|Q9JIG8|PRAF2_MOUSE	Praf2	2	0.247903	0.0425283	0.175102
sp|P35821|PTN1_MOUSE	Ptpn1	1	0.247046	0.0528463	0.194231
sp|Q6ZWN5|RS9_MOUSE	Rps9	25	0.245275	0.036896	0.164975
sp|Q9D6U8|F162A_MOUSE	Fam162a	4	0.244457	0.0865419	0.255799
sp|P62245|RS15A_MOUSE	Rps15a	15	0.244094	0.041415	0.173572
sp|O54781|SRPK2_MOUSE	Srpk2	8	0.243366	0.0715213	0.228969
sp|Q6GQT9|NOMO1_MOUSE	Nomo1	25	0.243185	0.0561666	0.19964
sp|P97376|FRG1_MOUSE	Frg1	3	0.243035	0.0956837	0.272447
sp|Q9R0Q3|TMED2_MOUSE	Tmed2	3	0.241018	0.206787	0.417139
sp|Q791V5|MTCH2_MOUSE	Mtch2	7	0.240534	0.917707	0.954416
sp|P53986|MOT1_MOUSE	Slc16a1	1	0.239891	0.0912107	0.264041
sp|P30999|CTND1_MOUSE	Ctnnd1	9	0.239407	0.80956	0.897564
sp|F8VPU2|FARP1_MOUSE	Farp1	8	0.238889	0.348523	0.562885
sp|P16330|CN37_MOUSE	Cnp	5	0.238576	0.0279739	0.148209
sp|Q9CPT5|NOP16_MOUSE	Nop16	8	0.238535	0.0378154	0.165398
sp|P63089|PTN_MOUSE	Ptn	11	0.237706	0.353356	0.564253
sp|Q6ZWQ7|SPCS3_MOUSE	Spcs3	1	0.237668	0.786275	0.884559
sp|Q91WQ3|SYYC_MOUSE	Yars	17	0.237029	0.063115	0.21613
sp|P70349|HINT1_MOUSE	Hint1	1	0.234606	0.295525	0.515211
sp|Q99NH0|ANR17_MOUSE	Ankrd17	4	0.234522	0.108634	0.28847
sp|Q61191|HCFC1_MOUSE	Hcfc1	6	0.233238	0.774801	0.878692
sp|Q925N0|SFXN5_MOUSE	Sfxn5	14	0.231704	0.0587461	0.205173
sp|Q9D7S7|RL22L_MOUSE	Rpl22l1	5	0.231258	0.0556732	0.198389
sp|Q6ZWV3|RL10_MOUSE	Rpl10	21	0.23077	0.134789	0.332406
sp|P10922|H10_MOUSE	H1f0	9	0.230252	0.400024	0.607172
sp|Q9DCU6|RM04_MOUSE	Mrpl4	1	0.230245	0.31439	0.530671
sp|Q60930|VDAC2_MOUSE	Vdac2	20	0.22965	0.0415903	0.173788
sp|Q9CQV5|RT24_MOUSE	Mrps24	2	0.229595	0.888426	0.939546
sp|P61514|RL37A_MOUSE	Rpl37a	7	0.228927	0.180031	0.3931
sp|Q9CW03|SMC3_MOUSE	Smc3	25	0.228926	0.341047	0.558143
sp|P10649|GSTM1_MOUSE	Gstm1	2	0.228406	0.195419	0.40675
sp|Q91V92|ACLY_MOUSE	Acly	24	0.227688	0.144741	0.347379
sp|O70551|SRPK1_MOUSE	Srpk1	2	0.227396	0.137201	0.335009
sp|Q9WV02|RBMX_MOUSE	Rbmx	9	0.227358	0.264029	0.482051
sp|P61028|RAB8B_MOUSE	Rab8b	3	0.226506	0.355599	0.565412
sp|P46978|STT3A_MOUSE	Stt3a	10	0.226505	0.0644278	0.216403
sp|Q6PDG5|SMRC2_MOUSE	Smarcc2	3	0.225845	0.216227	0.431839
sp|P63038|CH60_MOUSE	Hspd1	29	0.222574	0.0991969	0.276399
sp|P55066|NCAN_MOUSE	Ncan	11	0.222319	0.044883	0.180627
sp|Q3UMU9|HDGR2_MOUSE	Hdgfrp2	7	0.219802	0.0653114	0.218327
sp|Q9D1E8|PLCE_MOUSE	Agpat5	3	0.219484	0.0535662	0.19513
sp|Q9R0A0|PEX14_MOUSE	Pex14	2	0.217997	0.231149	0.445177
sp|P61804|DAD1_MOUSE	Dad1	2	0.217535	0.772177	0.877844
sp|Q6URW6|MYH14_MOUSE	Myh14	2	0.21742	0.446597	0.6431
sp|P08775|RPB1_MOUSE	Polr2a	10	0.215434	0.0772131	0.238257
sp|P47758|SRPRB_MOUSE	Srprb	8	0.215416	0.0547252	0.197011
sp|Q99LF4|RTCB_MOUSE	Rtcb	20	0.215318	0.416852	0.618668
sp|Q9JIF7|COPB_MOUSE	Copb1	4	0.215211	0.945744	0.968508
sp|Q9D379|HYEP_MOUSE	Ephx1	4	0.214908	0.33234	0.550891
sp|P32020|NLTP_MOUSE	Scp2	2	0.214734	0.0807655	0.247587
sp|Q8R310|TMCC3_MOUSE	Tmcc3	2	0.214432	0.0869061	0.255799
sp|P99027|RLA2_MOUSE	Rplp2	6	0.214192	0.169695	0.383334
sp|Q8R2Y8|PTH2_MOUSE	Ptrh2	4	0.213805	0.945429	0.968508
sp|Q9D1J3|SARNP_MOUSE	Sarnp	7	0.212883	0.11543	0.301791
sp|Q8BFZ9|ERLN2_MOUSE	Erlin2	13	0.211262	0.122875	0.313667
sp|Q9D517|PLCC_MOUSE	Agpat3	7	0.210937	0.168076	0.382671
sp|P56564|EAA1_MOUSE	Slc1a3	8	0.208979	0.773621	0.878063
sp|Q1HFZ0|NSUN2_MOUSE	Nsun2	21	0.208718	0.0556016	0.198389
sp|Q3U9G9|LBR_MOUSE	Lbr	13	0.208229	0.294094	0.514848
sp|Q922Q1|MARC2_MOUSE	Marc2	6	0.207859	0.0553051	0.198389
sp|O70133|DHX9_MOUSE	Dhx9	82	0.206379	0.0908137	0.264041
sp|P45952|ACADM_MOUSE	Acadm	4	0.205497	0.17506	0.384639
sp|Q6VNB8|WDFY3_MOUSE	Wdfy3	2	0.205061	0.757892	0.867928
sp|Q9DCT2|NDUS3_MOUSE	Ndufs3	6	0.205015	0.0701221	0.226846
sp|Q9D0F3|LMAN1_MOUSE	Lman1	11	0.204851	0.0650848	0.218088
sp|O70152|DPM1_MOUSE	Dpm1	3	0.203479	0.19073	0.402684
sp|Q9CQH7|BT3L4_MOUSE	Btf3l4	3	0.203264	0.483986	0.676136
sp|P97820|M4K4_MOUSE	Map4k4	32	0.203079	0.126234	0.318659
sp|Q5U4C3|SFR19_MOUSE	Scaf1	3	0.202188	0.0509848	0.191089
sp|Q9DBG7|SRPRA_MOUSE	Srpra	4	0.201723	0.841208	0.91911
sp|O70503|DHB12_MOUSE	Hsd17b12	21	0.200274	0.391845	0.598773
sp|Q91VE6|MK67I_MOUSE	Nifk	6	0.200149	0.63653	0.784342
sp|P99024|TBB5_MOUSE	Tubb5	5	0.199506	0.17402	0.384156
sp|Q9DC70|NDUS7_MOUSE	Ndufs7	6	0.199369	0.103595	0.282422
sp|P16254|SRP14_MOUSE	Srp14	3	0.198354	0.615063	0.771036
sp|P14115|RL27A_MOUSE	Rpl27a	11	0.19793	0.117694	0.304876
sp|Q9CPQ8|ATP5L_MOUSE	Atp5l	6	0.196714	0.0466166	0.184581
sp|Q60932|VDAC1_MOUSE	Vdac1	22	0.196707	0.0764456	0.236931
sp|Q9CR59|G45IP_MOUSE	Gadd45gip1	2	0.196682	0.9559	0.973439
sp|Q6NZN0|RBM26_MOUSE	Rbm26	5	0.196598	0.226824	0.441621
sp|Q6DFV1|CNDG2_MOUSE	Ncapg2	2	0.196469	0.658538	0.797058
sp|P62192|PRS4_MOUSE	Psmc1	4	0.195965	0.0454427	0.181771
sp|Q9Z0R9|FADS2_MOUSE	Fads2	14	0.195537	0.103415	0.282422
sp|Q8K1E0|STX5_MOUSE	Stx5	2	0.195459	0.716921	0.844127
sp|P62983|RS27A_MOUSE	Rps27a	8	0.19512	0.339478	0.557809
sp|Q9CZM2|RL15_MOUSE	Rpl15	12	0.194663	0.192549	0.4047
sp|Q8VE22|RT23_MOUSE	Mrps23	5	0.19337	0.0706372	0.227988
sp|Q9Z130|HNRDL_MOUSE	Hnrnpdl	18	0.193054	0.0483292	0.186926
sp|P17742|PPIA_MOUSE	Ppia	6	0.192715	0.149368	0.354844
sp|Q9ESZ8|GTF2I_MOUSE	Gtf2i	23	0.190061	0.341554	0.558143
sp|Q8CAQ8|MIC60_MOUSE	Immt	50	0.18986	0.0930863	0.267266
sp|Q3TKT4|SMCA4_MOUSE	Smarca4	11	0.18941	0.717247	0.844127
sp|Q8R1M2|H2AJ_MOUSE	H2afj	9	0.189362	0.15375	0.360375
sp|Q9CQS8|SC61B_MOUSE	Sec61b	2	0.189039	0.261265	0.480154
sp|Q8VCC9|SPON1_MOUSE	Spon1	18	0.188451	0.784474	0.884251
sp|Q9CQN1|TRAP1_MOUSE	Trap1	19	0.188397	0.43847	0.634652
sp|P62754|RS6_MOUSE	Rps6	23	0.188319	0.168737	0.383334
sp|O88343|S4A4_MOUSE	Slc4a4	12	0.187935	0.10869	0.28847
sp|Q8CG48|SMC2_MOUSE	Smc2	13	0.187341	0.208191	0.419369
sp|P68404|KPCB_MOUSE	Prkcb	2	0.187179	0.118428	0.305089
sp|Q61263|SOAT1_MOUSE	Soat1	4	0.186874	0.206637	0.417139
sp|Q9D1D4|TMEDA_MOUSE	Tmed10	10	0.185267	0.143775	0.345702
sp|P51150|RAB7A_MOUSE	Rab7a	6	0.184484	0.104214	0.28301
sp|Q925I1|ATAD3_MOUSE	Atad3	14	0.18425	0.522974	0.70519
sp|Q91YQ5|RPN1_MOUSE	Rpn1	39	0.18406	0.12642	0.318659
sp|P68254|1433T_MOUSE	Ywhaq	6	0.183612	0.352988	0.564253
sp|Q8VE92|RBM4B_MOUSE	Rbm4b	7	0.183054	0.121806	0.312072
sp|Q9WV32|ARC1B_MOUSE	Arpc1b	1	0.182703	0.689853	0.821505
sp|Q6ZWU9|RS27_MOUSE	Rps27	5	0.181219	0.0718206	0.229173
sp|P29416|HEXA_MOUSE	Hexa	5	0.181218	0.344692	0.561262
sp|Q7TQH0|ATX2L_MOUSE	Atxn2l	2	0.180952	0.683073	0.818023
sp|Q9CXW2|RT22_MOUSE	Mrps22	3	0.18043	0.16464	0.378943
sp|Q9CY50|SSRA_MOUSE	Ssr1	2	0.179768	0.81061	0.897564
sp|O35465|FKBP8_MOUSE	Fkbp8	9	0.179609	0.547953	0.721401
sp|Q8BMK4|CKAP4_MOUSE	Ckap4	41	0.179319	0.0585774	0.205094
sp|Q8C3X8|LMF2_MOUSE	Lmf2	5	0.178924	0.226327	0.441621
sp|Q91VS7|MGST1_MOUSE	Mgst1	6	0.177694	0.114283	0.29975
sp|Q04750|TOP1_MOUSE	Top1	19	0.177208	0.292044	0.512537
sp|P14576|SRP54_MOUSE	Srp54	4	0.17622	0.202638	0.413423
sp|Q9D7G0|PRPS1_MOUSE	Prps1	3	0.175843	0.265768	0.483967
sp|Q9CYN2|SPCS2_MOUSE	Spcs2	7	0.175223	0.112718	0.29636
sp|Q9Z1X2|PTSS2_MOUSE	Ptdss2	2	0.1748	0.132325	0.32999
sp|Q8K273|MMGT1_MOUSE	Mmgt1	4	0.174156	0.959578	0.97556
sp|O08663|MAP2_MOUSE	Metap2	4	0.173438	0.676438	0.813449
sp|Q9DBH5|LMAN2_MOUSE	Lman2	7	0.17287	0.844591	0.919719
sp|Q8BHC4|DCAKD_MOUSE	Dcakd	9	0.172756	0.289064	0.510944
sp|Q9D1G2|PMVK_MOUSE	Pmvk	2	0.172588	0.190281	0.402684
sp|P54071|IDHP_MOUSE	Idh2	8	0.172113	0.266642	0.48493
sp|Q8VD12|Z385A_MOUSE	Znf385a	4	0.17007	0.510705	0.692783
sp|Q91VR5|DDX1_MOUSE	Ddx1	28	0.16906	0.423796	0.622878
sp|Q61033|LAP2A_MOUSE	Tmpo	2	0.167415	0.684413	0.818023
sp|Q9DB72|BTBDH_MOUSE	Btbd17	2	0.166404	0.226114	0.441621
sp|Q3TLH4|PRC2C_MOUSE	Prrc2c	22	0.166368	0.10158	0.278552
sp|P62996|TRA2B_MOUSE	Tra2b	19	0.166262	0.125631	0.317811
sp|P47963|RL13_MOUSE	Rpl13	21	0.164968	0.350066	0.562885
sp|P62874|GBB1_MOUSE	Gnb1	10	0.163871	0.159188	0.369421
sp|P62911|RL32_MOUSE	Rpl32	7	0.162559	0.133289	0.33169
sp|O55142|RL35A_MOUSE	Rpl35a	12	0.162404	0.175697	0.385436
sp|Q8VDM4|PSMD2_MOUSE	Psmd2	5	0.162322	0.127844	0.320524
sp|P47857|PFKAM_MOUSE	Pfkm	19	0.161599	0.748219	0.863898
sp|Q922Q8|LRC59_MOUSE	Lrrc59	18	0.161498	0.15077	0.356365
sp|Q8C7X2|EMC1_MOUSE	Emc1	27	0.16138	0.334392	0.552749
sp|Q921F2|TADBP_MOUSE	Tardbp	13	0.16085	0.174465	0.384535
sp|P97863|NFIB_MOUSE	Nfib	4	0.160044	0.190529	0.402684
sp|Q91VM5|RMXL1_MOUSE	Rbmxl1	39	0.160007	0.304724	0.522384
sp|Q64133|AOFA_MOUSE	Maoa	12	0.159044	0.35126	0.562885
sp|P61222|ABCE1_MOUSE	Abce1	4	0.158868	0.238359	0.454349
sp|Q91VK4|ITM2C_MOUSE	Itm2c	3	0.158174	0.336611	0.555349
sp|P35979|RL12_MOUSE	Rpl12	8	0.157742	0.0910297	0.264041
sp|Q8VHR5|P66B_MOUSE	Gatad2b	6	0.157513	0.190022	0.402684
sp|Q8VEE4|RFA1_MOUSE	Rpa1	3	0.156923	0.895679	0.940669
sp|P62702|RS4X_MOUSE	Rps4x	34	0.15659	0.367769	0.576925
sp|Q6GSS7|H2A2A_MOUSE	Hist2h2aa1	2	0.15606	0.549453	0.721401
sp|P09055|ITB1_MOUSE	Itgb1	4	0.155579	0.261964	0.480154
sp|P60603|ROMO1_MOUSE	Romo1	1	0.155375	0.188258	0.402276
sp|Q2TPA8|HSDL2_MOUSE	Hsdl2	3	0.154629	0.809308	0.897564
sp|Q69ZK0|PREX1_MOUSE	Prex1	12	0.154078	0.231039	0.445177
sp|O35685|NUDC_MOUSE	Nudc	4	0.152116	0.143658	0.345702
sp|Q64152|BTF3_MOUSE	Btf3	7	0.150905	0.221257	0.438764
sp|Q52KI8|SRRM1_MOUSE	Srrm1	17	0.150199	0.719674	0.845542
sp|Q9QYS9|QKI_MOUSE	Qki	20	0.149847	0.287618	0.509869
sp|Q8BVY0|RL1D1_MOUSE	Rsl1d1	26	0.149802	0.421908	0.622538
sp|O08582|GTPB1_MOUSE	Gtpbp1	6	0.149455	0.89844	0.941351
sp|P49718|MCM5_MOUSE	Mcm5	22	0.148781	0.169897	0.383334
sp|Q91WJ8|FUBP1_MOUSE	Fubp1	18	0.148777	0.935689	0.965252
sp|Q8CCS6|PABP2_MOUSE	Pabpn1	8	0.147753	0.185342	0.399111
sp|Q7TT37|ELP1_MOUSE	Ikbkap	3	0.147145	0.502506	0.686401
sp|P35282|RAB21_MOUSE	Rab21	3	0.147062	0.930878	0.96241
sp|Q9JKF1|IQGA1_MOUSE	Iqgap1	7	0.145802	0.375244	0.586326
sp|Q9CXY9|GPI8_MOUSE	Pigk	2	0.145557	0.475441	0.671319
sp|P48962|ADT1_MOUSE	Slc25a4	14	0.145482	0.0657461	0.218738
sp|P23708|NFYA_MOUSE	Nfya	3	0.144164	0.146419	0.350806
sp|Q9WUK4|RFC2_MOUSE	Rfc2	4	0.143343	0.895779	0.940669
sp|P19253|RL13A_MOUSE	Rpl13a	13	0.142896	0.26054	0.480154
sp|Q5F2E8|TAOK1_MOUSE	Taok1	5	0.141314	0.365077	0.575919
sp|P54823|DDX6_MOUSE	Ddx6	8	0.140914	0.170191	0.383334
sp|Q9JKN5|OLIG1_MOUSE	Olig1	4	0.14085	0.703637	0.833171
sp|Q3UN02|LCLT1_MOUSE	Lclat1	3	0.139665	0.836287	0.915872
sp|Q9D328|TM35A_MOUSE	Tmem35a	2	0.138558	0.331478	0.550112
sp|P60710|ACTB_MOUSE	Actb	33	0.138389	0.215631	0.431261
sp|Q7TPV4|MBB1A_MOUSE	Mybbp1a	55	0.138337	0.146949	0.350879
sp|Q922Q4|P5CR2_MOUSE	Pycr2	5	0.138314	0.201145	0.412274
sp|Q80UM3|NAA15_MOUSE	Naa15	6	0.136685	0.160712	0.37173
sp|O08529|CAN2_MOUSE	Capn2	3	0.136636	0.0787657	0.242515
sp|P20029|GRP78_MOUSE	Hspa5	30	0.136206	0.122471	0.313206
sp|Q3TEA8|HP1B3_MOUSE	Hp1bp3	32	0.136197	0.283524	0.505162
sp|Q80WW9|DDRGK_MOUSE	Ddrgk1	3	0.13551	0.475912	0.671319
sp|Q9JKN6|NOVA1_MOUSE	Nova1	4	0.13529	0.271603	0.489513
sp|Q9CXW4|RL11_MOUSE	Rpl11	13	0.134899	0.311781	0.530594
sp|Q9DCN2|NB5R3_MOUSE	Cyb5r3	7	0.134895	0.255443	0.474394
sp|Q9CRD2|EMC2_MOUSE	Emc2	12	0.134719	0.157918	0.367285
sp|P35278|RAB5C_MOUSE	Rab5c	6	0.13366	0.418911	0.619759
sp|Q3V3R1|C1TM_MOUSE	Mthfd1l	14	0.132809	0.183823	0.397582
sp|P12970|RL7A_MOUSE	Rpl7a	30	0.13216	0.217402	0.432953
sp|Q80XN0|BDH_MOUSE	Bdh1	3	0.132069	0.934059	0.964278
sp|Q8R323|RFC3_MOUSE	Rfc3	6	0.131891	0.314369	0.530671
sp|P27659|RL3_MOUSE	Rpl3	32	0.13148	0.325535	0.542816
sp|P57784|RU2A_MOUSE	Snrpa1	3	0.131268	0.337287	0.555811
sp|Q8R3Y5|CS047_MOUSE	NA	1	0.131144	0.625325	0.774896
sp|P97760|RPB3_MOUSE	Polr2c	1	0.130915	0.63686	0.784342
sp|Q6NVF9|CPSF6_MOUSE	Cpsf6	4	0.130553	0.298104	0.517352
sp|Q9CQJ1|HIG2A_MOUSE	Higd2a	1	0.128101	0.549084	0.721401
sp|P54775|PRS6B_MOUSE	Psmc4	5	0.127101	0.660814	0.799124
sp|Q9WTM5|RUVB2_MOUSE	Ruvbl2	7	0.126184	0.838756	0.917859
sp|P05213|TBA1B_MOUSE	Tuba1b	30	0.125895	0.756305	0.867571
sp|Q9DCF9|SSRG_MOUSE	Ssr3	6	0.125514	0.204142	0.414783
sp|Q60865|CAPR1_MOUSE	Caprin1	15	0.125499	0.949824	0.971269
sp|Q9EPE9|AT131_MOUSE	Atp13a1	12	0.124466	0.232583	0.446713
sp|Q9D1R9|RL34_MOUSE	Rpl34	9	0.123942	0.38812	0.596089
sp|Q62086|PON2_MOUSE	Pon2	4	0.121637	0.19933	0.410118
sp|Q4FK66|PR38A_MOUSE	Prpf38a	6	0.120546	0.623134	0.773545
sp|Q91V61|SFXN3_MOUSE	Sfxn3	5	0.119889	0.13824	0.33696
sp|Q99LC5|ETFA_MOUSE	Etfa	8	0.119682	0.238501	0.454349
sp|Q9CPX7|RT16_MOUSE	Mrps16	2	0.117234	0.346039	0.561563
sp|Q3UPL0|SC31A_MOUSE	Sec31a	11	0.117202	0.619127	0.772691
sp|Q6PGN3|DCLK2_MOUSE	Dclk2	13	0.11643	0.173497	0.383819
sp|Q9EP69|SAC1_MOUSE	Sacm1l	14	0.116055	0.655127	0.797052
sp|Q61687|ATRX_MOUSE	Atrx	3	0.115554	0.849186	0.922086
sp|Q8VEH3|ARL8A_MOUSE	Arl8a	2	0.115445	0.105641	0.285232
sp|Q9EQW6|OLIG2_MOUSE	Olig2	1	0.115232	0.615725	0.771167
sp|Q8BG51|MIRO1_MOUSE	Rhot1	2	0.1151	0.558607	0.728213
sp|O09118|NET1_MOUSE	Ntn1	9	0.114495	0.417389	0.618811
sp|Q8CD10|MICU2_MOUSE	Micu2	1	0.113948	0.0715936	0.228969
sp|P35550|FBRL_MOUSE	Fbl	17	0.113914	0.427303	0.625582
sp|Q3THK3|T2FA_MOUSE	Gtf2f1	2	0.11309	0.268003	0.486145
sp|Q8BGY2|IF5A2_MOUSE	Eif5a2	4	0.111251	0.356	0.565412
sp|Q99KV1|DJB11_MOUSE	Dnajb11	2	0.110554	0.915197	0.95251
sp|P46460|NSF_MOUSE	Nsf	3	0.109747	0.388198	0.596089
sp|Q9Z0N1|IF2G_MOUSE	Eif2s3x	15	0.109135	0.498727	0.686401
sp|Q9D2N4|DTNA_MOUSE	Dtna	1	0.108813	0.389412	0.596871
sp|Q8VCM8|NCLN_MOUSE	Ncln	15	0.107747	0.152827	0.359477
sp|Q6PFR5|TRA2A_MOUSE	Tra2a	8	0.10766	0.23256	0.446713
sp|Q03963|E2AK2_MOUSE	Eif2ak2	14	0.10763	0.181148	0.394401
sp|O88291|ZN326_MOUSE	Znf326	14	0.106995	0.671805	0.808931
sp|Q9QYF1|RDH11_MOUSE	Rdh11	6	0.106958	0.588426	0.747648
sp|Q8BTV2|CPSF7_MOUSE	Cpsf7	3	0.10524	0.214103	0.428817
sp|P49962|SRP09_MOUSE	Srp9	2	0.104909	0.801666	0.891869
sp|Q9QYF9|NDRG3_MOUSE	Ndrg3	4	0.104239	0.225681	0.441621
sp|Q61070|EI24_MOUSE	Ei24	4	0.103828	0.236398	0.452183
sp|Q921H8|THIKA_MOUSE	Acaa1a	3	0.103708	0.765998	0.873954
sp|P13011|ACOD2_MOUSE	Scd2	4	0.103551	0.458026	0.654856
sp|Q8VC70|RBMS2_MOUSE	Rbms2	2	0.103322	0.353989	0.564253
sp|Q8VBZ3|CLPT1_MOUSE	Clptm1	7	0.103244	0.153181	0.359642
sp|Q3U0V1|FUBP2_MOUSE	Khsrp	29	0.103067	0.533572	0.710244
sp|P31938|MP2K1_MOUSE	Map2k1	5	0.102281	0.9555	0.973439
sp|P35700|PRDX1_MOUSE	Prdx1	6	0.102249	0.526732	0.706328
sp|Q8VEK3|HNRPU_MOUSE	Hnrnpu	58	0.101853	0.271269	0.489513
sp|Q80UM7|MOGS_MOUSE	Mogs	4	0.101757	0.49638	0.686401
sp|Q8BJW6|EIF2A_MOUSE	Eif2a	4	0.101673	0.288544	0.510864
sp|Q9R190|MTA2_MOUSE	Mta2	3	0.101401	0.746914	0.863101
sp|Q9QYJ0|DNJA2_MOUSE	Dnaja2	5	0.100959	0.58397	0.745524
sp|Q9CYL5|GAPR1_MOUSE	Glipr2	2	0.100679	0.858583	0.927091
sp|Q3UL36|ARGL1_MOUSE	Arglu1	10	0.100339	0.723075	0.84743
sp|O70492|SNX3_MOUSE	Snx3	8	0.100231	0.540527	0.715268
sp|Q9CU62|SMC1A_MOUSE	Smc1a	27	0.0992175	0.952233	0.972439
sp|O54984|ASNA_MOUSE	Asna1	4	0.0990962	0.290045	0.510944
sp|Q9QZQ8|H2AY_MOUSE	H2afy	12	0.0989489	0.184279	0.397582
sp|P61089|UBE2N_MOUSE	Ube2n	3	0.0982088	0.992073	0.99278
sp|O55135|IF6_MOUSE	Eif6	3	0.0979042	0.228278	0.441621
sp|Q9ERU3|ZNF22_MOUSE	Znf22	7	0.0978373	0.396436	0.603683
sp|Q8BL97|SRSF7_MOUSE	Srsf7	10	0.0971597	0.704769	0.83361
sp|P11031|TCP4_MOUSE	Sub1	11	0.0967211	0.750245	0.864489
sp|Q61035|SYHC_MOUSE	Hars	6	0.0960413	0.466289	0.66172
sp|Q9CQY5|MAGT1_MOUSE	Magt1	4	0.0951792	0.344992	0.561262
sp|Q61036|PAK3_MOUSE	Pak3	2	0.0946974	0.845041	0.919719
sp|Q3UUQ7|PGAP1_MOUSE	Pgap1	7	0.0946534	0.259162	0.48003
sp|Q9CRC0|VKOR1_MOUSE	Vkorc1	1	0.0943556	0.291273	0.512465
sp|Q6P542|ABCF1_MOUSE	Abcf1	11	0.0942972	0.451131	0.648298
sp|Q9WVA3|BUB3_MOUSE	Bub3	5	0.0939393	0.588305	0.747648
sp|O88712|CTBP1_MOUSE	Ctbp1	5	0.0923573	0.889232	0.939546
sp|Q925G2|CYBR1_MOUSE	Cybrd1	1	0.0923262	0.970726	0.982624
sp|P41105|RL28_MOUSE	Rpl28	15	0.0922507	0.490878	0.68232
sp|P59326|YTHD1_MOUSE	Ythdf1	1	0.0911819	0.64165	0.786343
sp|Q9JJE4|PAQR4_MOUSE	Paqr4	1	0.0910147	0.405381	0.612681
sp|Q9CQV1|TIM16_MOUSE	Pam16	1	0.090695	0.41561	0.617659
sp|Q99PU8|DHX30_MOUSE	Dhx30	10	0.0903967	0.299033	0.517512
sp|Q8C147|DOCK8_MOUSE	Dock8	1	0.089775	0.581712	0.745186
sp|P56581|TDG_MOUSE	Tdg	3	0.0897614	0.592453	0.750212
sp|Q9CPR4|RL17_MOUSE	Rpl17	16	0.0894213	0.485305	0.676631
sp|P53026|RL10A_MOUSE	Rpl10a	13	0.08918	0.196128	0.407344
sp|Q91ZS8|RED1_MOUSE	Adarb1	5	0.0891497	0.497957	0.686401
sp|P63101|1433Z_MOUSE	Ywhaz	4	0.087872	0.490548	0.68232
sp|Q924C1|XPO5_MOUSE	Xpo5	3	0.0873025	0.646952	0.79122
sp|P51410|RL9_MOUSE	Rpl9	13	0.0864484	0.782294	0.883621
sp|P11440|CDK1_MOUSE	Cdk1	4	0.0863295	0.168168	0.382671
sp|Q6PD26|PIGS_MOUSE	Pigs	3	0.0860022	0.261799	0.480154
sp|Q02780|NFIA_MOUSE	Nfia	7	0.0857248	0.549676	0.721401
sp|Q3UMY5|EMAL4_MOUSE	Eml4	2	0.0856588	0.205658	0.417139
sp|Q9DBR1|XRN2_MOUSE	Xrn2	3	0.0854132	0.705806	0.833718
sp|Q9CWF2|TBB2B_MOUSE	Tubb2b	9	0.0848277	0.988452	0.99278
sp|P07356|ANXA2_MOUSE	Anxa2	2	0.084648	0.202453	0.413423
sp|P39447|ZO1_MOUSE	Tjp1	24	0.0844428	0.921463	0.956904
sp|Q80ZS3|RT26_MOUSE	Mrps26	3	0.0842942	0.678303	0.81466
sp|O70378|EMC8_MOUSE	Emc8	9	0.0839804	0.535079	0.711412
sp|O55143|AT2A2_MOUSE	Atp2a2	38	0.0818043	0.427988	0.625932
sp|Q9JKP5|MBNL1_MOUSE	Mbnl1	1	0.0816195	0.879165	0.934276
sp|Q99LR1|ABD12_MOUSE	Abhd12	11	0.0814611	0.198993	0.410118
sp|Q8C3X4|GUF1_MOUSE	Guf1	3	0.0811191	0.576095	0.7417
sp|Q5U4E2|REPI1_MOUSE	Repin1	3	0.0805988	0.181373	0.394401
sp|P18653|KS6A1_MOUSE	Rps6ka1	8	0.0801054	0.913336	0.951985
sp|Q00PI9|HNRL2_MOUSE	Hnrnpul2	27	0.0789275	0.941828	0.96759
sp|Q9Z2D8|MBD3_MOUSE	Mbd3	3	0.0788142	0.26101	0.480154
sp|Q78XF5|OSTC_MOUSE	Ostc	1	0.07864	0.744016	0.862432
sp|P63017|HSP7C_MOUSE	Hspa8	34	0.078189	0.610471	0.767324
sp|Q921E2|RAB31_MOUSE	Rab31	3	0.0769947	0.852149	0.924589
sp|Q8R189|PAQRA_MOUSE	Mmd2	1	0.0764448	0.763979	0.873475
sp|P08226|APOE_MOUSE	Apoe	19	0.0764387	0.540426	0.715268
sp|Q8BI72|CARF_MOUSE	Cdkn2aip	5	0.0761952	0.742474	0.862228
sp|P17426|AP2A1_MOUSE	Ap2a1	12	0.0761812	0.308195	0.527048
sp|P68040|RACK1_MOUSE	Rack1	3	0.0756196	0.500809	0.686401
sp|P03995|GFAP_MOUSE	Gfap	55	0.0754449	0.378788	0.589331
sp|Q99KI3|EMC3_MOUSE	Emc3	8	0.0752432	0.888177	0.939546
sp|Q60605|MYL6_MOUSE	Myl6	6	0.0749195	0.340089	0.557809
sp|P68372|TBB4B_MOUSE	Tubb4b	32	0.0747548	0.459527	0.656334
sp|Q3URQ0|TEX10_MOUSE	Tex10	2	0.0743484	0.407591	0.614669
sp|Q8BKC5|IPO5_MOUSE	Ipo5	4	0.0734027	0.780949	0.883363
sp|B9EJI9|T229A_MOUSE	Tmem229a	4	0.0732011	0.579952	0.744289
sp|Q80SZ7|GBG5_MOUSE	Gng5	2	0.073089	0.665342	0.801837
sp|Q9QXZ0|MACF1_MOUSE	Macf1	17	0.0722264	0.727254	0.84891
sp|P46735|MYO1B_MOUSE	Myo1b	11	0.0708078	0.821492	0.903191
sp|Q9DBG6|RPN2_MOUSE	Rpn2	17	0.0706366	0.323701	0.541043
sp|Q7TMF2|ERI1_MOUSE	Eri1	4	0.0705146	0.856212	0.927091
sp|Q9CQE8|CN166_MOUSE	NA	9	0.0686772	0.374929	0.586326
sp|P62334|PRS10_MOUSE	Psmc6	9	0.0661975	0.188489	0.402276
sp|Q9D024|CCD47_MOUSE	Ccdc47	19	0.0656976	0.251831	0.469845
sp|P23198|CBX3_MOUSE	Cbx3	1	0.0649762	0.457631	0.654856
sp|P43024|CX6A1_MOUSE	Cox6a1	2	0.0648989	0.821085	0.903191
sp|Q91W43|GCSP_MOUSE	Gldc	9	0.0644467	0.582301	0.74526
sp|Q8BTM8|FLNA_MOUSE	Flna	13	0.0640615	0.425417	0.624123
sp|P47964|RL36_MOUSE	Rpl36	4	0.0633241	0.542299	0.716938
sp|Q64331|MYO6_MOUSE	Myo6	29	0.0627837	0.752102	0.864755
sp|Q9CY27|TECR_MOUSE	Tecr	11	0.0621725	0.250021	0.468665
sp|P14206|RSSA_MOUSE	Rpsa	7	0.0618304	0.749117	0.864223
sp|Q9EP72|EMC7_MOUSE	Emc7	5	0.0610577	0.912495	0.951815
sp|Q6DFW4|NOP58_MOUSE	Nop58	17	0.0609957	0.686974	0.819832
sp|Q9QY81|PO210_MOUSE	Nup210	5	0.0609053	0.893273	0.940669
sp|P20152|VIME_MOUSE	Vim	69	0.0607977	0.247594	0.465358
sp|Q91ZJ5|UGPA_MOUSE	Ugp2	4	0.0605173	0.430942	0.628751
sp|P35564|CALX_MOUSE	Canx	29	0.0605141	0.413081	0.617131
sp|Q9CZX0|ELP3_MOUSE	Elp3	6	0.0605122	0.739377	0.859403
sp|Q62167|DDX3X_MOUSE	Ddx3x	36	0.0603788	0.410731	0.616097
sp|Q9CR67|TMM33_MOUSE	Tmem33	5	0.0600345	0.274123	0.491325
sp|Q9JLV5|CUL3_MOUSE	Cul3	1	0.0580319	0.853644	0.925495
sp|Q60714|S27A1_MOUSE	Slc27a1	16	0.0579954	0.423021	0.622878
sp|P47962|RL5_MOUSE	Rpl5	20	0.0578491	0.32231	0.540004
sp|Q9EST5|AN32B_MOUSE	Anp32b	6	0.0575637	0.385778	0.595201
sp|Q9JIW9|RALB_MOUSE	Ralb	4	0.0574959	0.55016	0.721401
sp|Q69ZS7|HBS1L_MOUSE	Hbs1l	3	0.0574212	0.418535	0.619759
sp|Q9D0T1|NH2L1_MOUSE	Snu13	3	0.056908	0.312275	0.530671
sp|Q8R326|PSPC1_MOUSE	Pspc1	10	0.055567	0.785306	0.884251
sp|O35593|PSDE_MOUSE	Psmd14	2	0.0553057	0.81302	0.897564
sp|P51880|FABP7_MOUSE	Fabp7	7	0.05474	0.402929	0.610261
sp|Q05D44|IF2P_MOUSE	Eif5b	14	0.0546408	0.989711	0.99278
sp|O08547|SC22B_MOUSE	Sec22b	13	0.0545338	0.209576	0.420951
sp|P27661|H2AX_MOUSE	H2afx	3	0.0534723	0.718067	0.84436
sp|Q9WV60|GSK3B_MOUSE	Gsk3b	3	0.0534432	0.619143	0.772691
sp|Q91Z67|SRGP2_MOUSE	Srgap2	11	0.0533576	0.706048	0.833718
sp|Q9DBZ1|IKIP_MOUSE	Ikbip	5	0.0501741	0.493448	0.684586
sp|P97742|CPT1A_MOUSE	Cpt1a	6	0.0501249	0.596411	0.752346
sp|P61358|RL27_MOUSE	Rpl27	15	0.0494652	0.497735	0.686401
sp|Q922D8|C1TC_MOUSE	Mthfd1	10	0.0483911	0.420705	0.621758
sp|P32233|DRG1_MOUSE	Drg1	7	0.0479811	0.703804	0.833171
sp|O70318|E41L2_MOUSE	Epb41l2	14	0.047565	0.381711	0.592179
sp|Q3TAS6|EMC10_MOUSE	Emc10	4	0.0464924	0.987098	0.99278
sp|Q08761|PROS_MOUSE	Pros1	2	0.0459769	0.334642	0.552749
sp|O70310|NMT1_MOUSE	Nmt1	8	0.0453123	0.773355	0.878063
sp|P60060|SC61G_MOUSE	Sec61g	2	0.04483	0.198929	0.410118
sp|P97311|MCM6_MOUSE	Mcm6	16	0.0447504	0.924405	0.95925
sp|P56391|CX6B1_MOUSE	Cox6b1	5	0.0431542	0.351602	0.562885
sp|Q9CR57|RL14_MOUSE	Rpl14	10	0.0418479	0.243335	0.460435
sp|Q8K1R3|PNPT1_MOUSE	Pnpt1	3	0.0411404	0.676716	0.813449
sp|A2APV2|FMNL2_MOUSE	Fmnl2	10	0.0405086	0.814456	0.897564
sp|Q9CVB6|ARPC2_MOUSE	Arpc2	2	0.0403541	0.318047	0.534136
sp|Q9DC28|KC1D_MOUSE	Csnk1d	4	0.0392689	0.973259	0.983862
sp|Q5XJY5|COPD_MOUSE	Arcn1	5	0.0375404	0.929729	0.962104
sp|Q91ZM2|SH2B1_MOUSE	Sh2b1	1	0.0367486	0.326164	0.542999
sp|Q8CCJ3|UFL1_MOUSE	Ufl1	4	0.0367219	0.391932	0.598773
sp|Q9D7H3|RTCA_MOUSE	RtcA	12	0.0364145	0.500691	0.686401
sp|Q9Z1Z0|USO1_MOUSE	Uso1	4	0.0358928	0.987886	0.99278
sp|Q569Z6|TR150_MOUSE	Thrap3	54	0.0355439	0.491329	0.68232
sp|P08113|ENPL_MOUSE	Hsp90b1	21	0.035065	0.625089	0.774896
sp|Q9D8M4|RL7L_MOUSE	Rpl7l1	3	0.0347779	0.424125	0.622878
sp|Q7TMM9|TBB2A_MOUSE	Tubb2a	2	0.0347482	0.302206	0.519972
sp|Q61881|MCM7_MOUSE	Mcm7	13	0.0347375	0.636984	0.784342
sp|Q8K019|BCLF1_MOUSE	Bclaf1	52	0.0346546	0.751051	0.864489
sp|Q91ZW3|SMCA5_MOUSE	Smarca5	32	0.0336599	0.963753	0.978535
sp|Q63932|MP2K2_MOUSE	Map2k2	1	0.033176	0.968608	0.981187
sp|Q61029|LAP2B_MOUSE	Tmpo	19	0.0316495	0.897282	0.940839
sp|Q60737|CSK21_MOUSE	Csnk2a1	12	0.0313111	0.613573	0.770533
sp|Q9CW46|RAVR1_MOUSE	Raver1	3	0.0312743	0.551871	0.722113
sp|Q9D2R8|RT33_MOUSE	Mrps33	2	0.0309719	0.766006	0.873954
sp|P70168|IMB1_MOUSE	Kpnb1	6	0.0300674	0.46754	0.66172
sp|Q62189|SNRPA_MOUSE	Snrpa	7	0.0299686	0.794495	0.889531
sp|O88685|PRS6A_MOUSE	Psmc3	6	0.0298388	0.882912	0.9358
sp|P14869|RLA0_MOUSE	Rplp0	16	0.0293053	0.496544	0.686401
sp|Q8C7M3|TRIM9_MOUSE	Trim9	3	0.0292626	0.766266	0.873954
sp|Q6PAQ4|REXO4_MOUSE	Rexo4	5	0.0290848	0.974051	0.983862
sp|Q05512|MARK2_MOUSE	Mark2	3	0.0285483	0.87901	0.934276
sp|P28652|KCC2B_MOUSE	Camk2b	11	0.0283318	0.638896	0.784342
sp|Q9D5T0|ATAD1_MOUSE	Atad1	8	0.0283034	0.843482	0.919448
sp|Q99ME9|NOG1_MOUSE	Gtpbp4	7	0.0274257	0.655532	0.797052
sp|P14211|CALR_MOUSE	Calr	1	0.0271384	0.278557	0.498208
sp|Q9QYR6|MAP1A_MOUSE	Map1a	19	0.0267621	0.927125	0.960653
sp|Q7TPD0|INT3_MOUSE	Ints3	1	0.0255307	0.505983	0.68904
sp|Q922F4|TBB6_MOUSE	Tubb6	9	0.0253656	0.432764	0.629022
sp|Q3TVI8|PBIP1_MOUSE	Pbxip1	19	0.0253602	0.743693	0.862432
sp|Q9ER88|RT29_MOUSE	Dap3	5	0.0249559	0.909881	0.949794
sp|P83510|TNIK_MOUSE	Tnik	1	0.024096	0.581275	0.745186
sp|Q9D8E6|RL4_MOUSE	Rpl4	38	0.0239912	0.408493	0.614951
sp|Q80SY5|PR38B_MOUSE	Prpf38b	3	0.0239495	0.296136	0.515211
sp|Q8K363|DDX18_MOUSE	Ddx18	7	0.0236163	0.414058	0.617131
sp|Q9D0R8|LSM12_MOUSE	Lsm12	1	0.0234303	0.351214	0.562885
sp|Q07646|MEST_MOUSE	Mest	8	0.0231061	0.652673	0.796136
sp|Q501J6|DDX17_MOUSE	Ddx17	20	0.0230488	0.514447	0.696512
sp|Q99PU5|ACBG1_MOUSE	Acsbg1	16	0.0229772	0.411413	0.616173
sp|Q99KG3|RBM10_MOUSE	Rbm10	6	0.0223854	0.953045	0.972439
sp|P84104|SRSF3_MOUSE	Srsf3	15	0.021864	0.615071	0.771036
sp|Q9JLI8|SART3_MOUSE	Sart3	18	0.0214112	0.867826	0.932747
sp|Q9QZD9|EIF3I_MOUSE	Eif3i	7	0.0213938	0.801099	0.891869
sp|Q9WV55|VAPA_MOUSE	Vapa	10	0.0205527	0.829719	0.909388
sp|P26231|CTNA1_MOUSE	Ctnna1	5	0.0202539	0.931597	0.962444
sp|Q6PGC1|DHX29_MOUSE	Dhx29	2	0.0201589	0.787952	0.885028
sp|Q62446|FKBP3_MOUSE	Fkbp3	9	0.0200587	0.488398	0.680268
sp|Q8VDP4|CCAR2_MOUSE	Ccar2	18	0.0195497	0.510476	0.692783
sp|P25444|RS2_MOUSE	Rps2	20	0.0191323	0.991125	0.99278
sp|P48432|SOX2_MOUSE	Sox2	4	0.0186219	0.57635	0.7417
sp|P60766|CDC42_MOUSE	Cdc42	1	0.0163896	0.727378	0.84891
sp|P03975|IGEB_MOUSE	Iap	7	0.0163688	0.848555	0.922086
sp|Q8K3A9|MEPCE_MOUSE	Mepce	4	0.0149492	0.873057	0.933905
sp|Q80WJ7|LYRIC_MOUSE	Mtdh	16	0.0147097	0.952406	0.972439
sp|Q9WTS2|FUT8_MOUSE	Fut8	3	0.0138618	0.564304	0.730888
sp|Q99KF1|TMED9_MOUSE	Tmed9	7	0.0130382	0.682105	0.817827
sp|P59708|SF3B6_MOUSE	Sf3b6	3	0.0127325	0.991729	0.99278
sp|Q80ZE5|MPRB_MOUSE	Paqr8	1	0.0126208	0.896625	0.940839
sp|Q9WVJ2|PSD13_MOUSE	Psmd13	3	0.0124338	0.736977	0.859082
sp|A2RSY6|TRM1L_MOUSE	Trmt1l	4	0.0121644	0.566753	0.732708
sp|P62717|RL18A_MOUSE	Rpl18a	19	0.0115929	0.341851	0.558143
sp|P31650|S6A11_MOUSE	Slc6a11	5	0.0110615	0.984997	0.992776
sp|Q04447|KCRB_MOUSE	Ckb	20	0.0106624	0.414513	0.617154
sp|Q8R127|SCPDL_MOUSE	Sccpdh	3	0.0103683	0.366118	0.576267
sp|Q8VD75|HIP1_MOUSE	Hip1	15	0.00929245	0.803169	0.892834
sp|Q78IK4|MIC27_MOUSE	Apool	3	0.00927043	0.308999	0.52778
sp|Q60722|ITF2_MOUSE	Tcf4	2	0.00882843	0.757258	0.867911
sp|P97822|AN32E_MOUSE	Anp32e	3	0.00808655	0.502533	0.686401
sp|Q9ERK4|XPO2_MOUSE	Cse1l	4	0.00778881	0.533695	0.710244
sp|Q8VDM6|HNRL1_MOUSE	Hnrnpul1	23	0.00667342	0.843464	0.919448
sp|Q8K0T0|RTN1_MOUSE	Rtn1	2	0.00650451	0.752657	0.864755
sp|P17141|ZFP37_MOUSE	Zfp37	10	0.00636051	0.559211	0.728323
sp|O09167|RL21_MOUSE	Rpl21	12	0.00621093	0.415732	0.617659
sp|P35980|RL18_MOUSE	Rpl18	10	0.00547697	0.501436	0.686401
sp|Q3TXS7|PSMD1_MOUSE	Psmd1	9	0.00509564	0.784443	0.884251
sp|Q9ERU9|RBP2_MOUSE	Ranbp2	2	0.00363438	0.413539	0.617131
sp|Q62448|IF4G2_MOUSE	Eif4g2	6	0.00301914	0.873396	0.933905
sp|P13864|DNMT1_MOUSE	Dnmt1	9	0.00284622	0.451068	0.648298
sp|Q8CFG0|SULF2_MOUSE	Sulf2	11	0.00213492	0.485054	0.676631
sp|P70202|LXN_MOUSE	Lxn	3	0.00141054	0.856917	0.927091
sp|Q8CBE3|WDR37_MOUSE	Wdr37	1	0.000946568	0.240899	0.457057
sp|Q6NZJ6|IF4G1_MOUSE	Eif4g1	12	-5.11181e-05	0.907184	0.947683
sp|P32067|LA_MOUSE	Ssb	15	-0.00035377	0.38644	0.595567
sp|Q5XG73|ACBD5_MOUSE	Acbd5	2	-0.000754792	0.523487	0.70519
sp|Q60972|RBBP4_MOUSE	Rbbp4	3	-0.000995209	0.860193	0.927091
sp|Q71LX4|TLN2_MOUSE	Tln2	1	-0.00116257	0.661653	0.799373
sp|Q8K0L9|ZBT20_MOUSE	Zbtb20	3	-0.00152955	0.769676	0.877131
sp|Q3THE2|ML12B_MOUSE	Myl12b	2	-0.00169482	0.973748	0.983862
sp|Q9R0Q7|TEBP_MOUSE	Ptges3	5	-0.002567	0.874453	0.933905
sp|Q9CX86|ROA0_MOUSE	Hnrnpa0	24	-0.00295112	0.664902	0.801837
sp|Q08288|LYAR_MOUSE	Lyar	17	-0.00324545	0.882394	0.9358
sp|Q99JI6|RAP1B_MOUSE	Rap1b	2	-0.00449682	0.299302	0.517512
sp|Q3TDN2|FAF2_MOUSE	Faf2	5	-0.00486342	0.628387	0.778002
sp|Q3UA37|QRIC1_MOUSE	Qrich1	1	-0.00546692	0.634668	0.783706
sp|Q920L1|FADS1_MOUSE	Fads1	10	-0.00571166	0.895279	0.940669
sp|Q9WUQ2|PREB_MOUSE	Preb	7	-0.00608314	0.6953	0.826589
sp|O08583|THOC4_MOUSE	Alyref	10	-0.0061712	0.339779	0.557809
sp|Q8K284|TF3C1_MOUSE	Gtf3c1	6	-0.00774558	0.64252	0.786485
sp|Q9Z1M8|RED_MOUSE	Ik	4	-0.00842034	0.52605	0.706328
sp|Q9CQ48|NUDC2_MOUSE	Nudcd2	3	-0.008456	0.883144	0.9358
sp|O54774|AP3D1_MOUSE	Ap3d1	4	-0.00878451	0.326418	0.542999
sp|O55128|SAP18_MOUSE	Sap18	10	-0.0110725	0.621417	0.773014
sp|Q99KX1|MLF2_MOUSE	Mlf2	2	-0.0115272	0.751194	0.864489
sp|Q9CQL1|MGN2_MOUSE	Magohb	6	-0.011979	0.433472	0.629022
sp|Q9D8N0|EF1G_MOUSE	Eef1g	12	-0.0121166	0.585141	0.745524
sp|P55096|ABCD3_MOUSE	Abcd3	22	-0.012394	0.480505	0.672116
sp|P17427|AP2A2_MOUSE	Ap2a2	5	-0.0125437	0.456898	0.654822
sp|Q8BTI8|SRRM2_MOUSE	Srrm2	35	-0.0125534	0.812506	0.897564
sp|Q9CX30|YIF1B_MOUSE	Yif1b	1	-0.0138107	0.744492	0.862432
sp|Q99KN9|EPN4_MOUSE	Clint1	1	-0.0163922	0.687281	0.819832
sp|Q61768|KINH_MOUSE	Kif5b	8	-0.0164838	0.879341	0.934276
sp|Q91YR7|PRP6_MOUSE	Prpf6	21	-0.0166489	0.778865	0.881876
sp|Q9JII5|DAZP1_MOUSE	Dazap1	7	-0.0168995	0.426969	0.625582
sp|Q6PDQ2|CHD4_MOUSE	Chd4	32	-0.0176164	0.940321	0.96759
sp|Q6A026|PDS5A_MOUSE	Pds5a	9	-0.0180027	0.982503	0.990973
sp|Q6ZWX6|IF2A_MOUSE	Eif2s1	18	-0.0181641	0.465052	0.660863
sp|P62196|PRS8_MOUSE	Psmc5	9	-0.0183491	0.543211	0.717468
sp|Q9WUA2|SYFB_MOUSE	Farsb	3	-0.0185557	0.440574	0.63704
sp|Q922K7|NOP2_MOUSE	Nop2	2	-0.0188261	0.860302	0.927091
sp|Q91YR1|TWF1_MOUSE	Twf1	2	-0.0189483	0.550814	0.721401
sp|Q91WM1|STRBP_MOUSE	Strbp	7	-0.0194255	0.81227	0.897564
sp|P26041|MOES_MOUSE	Msn	7	-0.0196858	0.800049	0.891869
sp|Q91ZX7|LRP1_MOUSE	Lrp1	2	-0.0200539	0.616767	0.771699
sp|O08810|U5S1_MOUSE	Eftud2	33	-0.020774	0.507604	0.68991
sp|Q9DCL9|PUR6_MOUSE	Paics	8	-0.020835	0.975417	0.984533
sp|P63037|DNJA1_MOUSE	Dnaja1	4	-0.0210958	0.966323	0.97958
sp|Q8R349|CDC16_MOUSE	Cdc16	2	-0.0212717	0.943217	0.967868
sp|P68369|TBA1A_MOUSE	Tuba1a	2	-0.0223381	0.302001	0.519972
sp|Q61166|MARE1_MOUSE	Mapre1	3	-0.0226968	0.333728	0.552541
sp|Q9JJ28|FLII_MOUSE	Flii	2	-0.0231879	0.876259	0.934144
sp|Q8BUN5|SMAD3_MOUSE	Smad3	2	-0.0232395	0.477329	0.672116
sp|P70288|HDAC2_MOUSE	Hdac2	1	-0.0232649	0.292512	0.512717
sp|Q9R118|HTRA1_MOUSE	Htra1	2	-0.0236887	0.401804	0.609214
sp|Q8JZK9|HMCS1_MOUSE	Hmgcs1	8	-0.0250823	0.791222	0.886573
sp|P0C0S6|H2AZ_MOUSE	H2afz	3	-0.0256786	0.354065	0.564253
sp|Q6P5D8|SMHD1_MOUSE	Smchd1	13	-0.0257367	0.3396	0.557809
sp|P62073|TIM10_MOUSE	Timm10	2	-0.0264434	0.871069	0.933905
sp|Q8CCP0|NEMF_MOUSE	Nemf	7	-0.0271856	0.657626	0.797058
sp|Q8CI51|PDLI5_MOUSE	Pdlim5	8	-0.0283266	0.724188	0.848006
sp|Q91YE6|IPO9_MOUSE	Ipo9	3	-0.0291786	0.939342	0.96759
sp|Q9QUI0|RHOA_MOUSE	Rhoa	5	-0.0301031	0.554512	0.724893
sp|P19096|FAS_MOUSE	Fasn	31	-0.0301486	0.563652	0.730847
sp|Q8CG47|SMC4_MOUSE	Smc4	12	-0.0303208	0.575448	0.7417
sp|Q8C052|MAP1S_MOUSE	Map1s	5	-0.0305361	0.746198	0.862983
sp|Q9DBG3|AP2B1_MOUSE	Ap2b1	12	-0.0309394	0.87971	0.934276
sp|Q8C2Q3|RBM14_MOUSE	Rbm14	21	-0.0313389	0.858523	0.927091
sp|Q9WUR2|ECI2_MOUSE	Eci2	6	-0.0317012	0.720496	0.8458
sp|Q9QXS1|PLEC_MOUSE	Plec	2	-0.0318125	0.346835	0.561657
sp|Q61316|HSP74_MOUSE	Hspa4	3	-0.0319101	0.322765	0.540122
sp|Q8BWY3|ERF1_MOUSE	Etf1	1	-0.0328082	0.550792	0.721401
sp|Q791T5|MTCH1_MOUSE	Mtch1	2	-0.0340492	0.562805	0.730847
sp|O88487|DC1I2_MOUSE	Dync1i2	3	-0.0350665	0.468238	0.66204
sp|Q99JX7|NXF1_MOUSE	Nxf1	16	-0.0356	0.879377	0.934276
sp|Q9JLM8|DCLK1_MOUSE	Dclk1	2	-0.0360437	0.999064	0.999064
sp|E9Q784|ZC3HD_MOUSE	Zc3h13	9	-0.0363323	0.717268	0.844127
sp|Q8BG81|PDIP3_MOUSE	Poldip3	18	-0.0363463	0.860399	0.927091
sp|Q8R1B4|EIF3C_MOUSE	Eif3c	22	-0.0376377	0.392677	0.599259
sp|Q920Q6|MSI2H_MOUSE	Msi2	13	-0.0384449	0.406729	0.61403
sp|Q62318|TIF1B_MOUSE	Trim28	17	-0.039249	0.503936	0.686999
sp|P57776|EF1D_MOUSE	Eef1d	12	-0.0426382	0.846061	0.920116
sp|P33173|KIF1A_MOUSE	Kif1a	3	-0.0432984	0.585601	0.745524
sp|O09106|HDAC1_MOUSE	Hdac1	5	-0.043802	0.592582	0.750212
sp|Q3TFD2|PCAT1_MOUSE	Lpcat1	7	-0.0447424	0.943741	0.967868
sp|Q4VBE8|WDR18_MOUSE	Wdr18	2	-0.0458641	0.989515	0.99278
sp|P57780|ACTN4_MOUSE	Actn4	8	-0.0460808	0.39033	0.597626
sp|Q99L04|DHRS1_MOUSE	Dhrs1	4	-0.0467569	0.658082	0.797058
sp|Q7TSC1|PRC2A_MOUSE	Prrc2a	21	-0.0473039	0.608384	0.766031
sp|Q9R0N3|SYT11_MOUSE	Syt11	4	-0.0478446	0.798396	0.891869
sp|Q8R1V4|TMED4_MOUSE	Tmed4	4	-0.0478763	0.560428	0.729232
sp|Q3TDQ1|STT3B_MOUSE	Stt3b	17	-0.0480301	0.828501	0.909388
sp|Q9D6Z1|NOP56_MOUSE	Nop56	18	-0.0482787	0.723092	0.84743
sp|Q99JY9|ARP3_MOUSE	Actr3	4	-0.048312	0.310211	0.529127
sp|Q03141|MARK3_MOUSE	Mark3	17	-0.0488519	0.963899	0.978535
sp|Q9CZW4|ACSL3_MOUSE	Acsl3	10	-0.0500766	0.726594	0.84891
sp|P67984|RL22_MOUSE	Rpl22	10	-0.0512751	0.921322	0.956904
sp|Q8BHL3|TB10B_MOUSE	Tbc1d10b	1	-0.0520399	0.790275	0.886219
sp|Q8BP67|RL24_MOUSE	Rpl24	12	-0.0530421	0.537186	0.712804
sp|P62821|RAB1A_MOUSE	Rab1A	4	-0.0539619	0.591947	0.750212
sp|P14733|LMNB1_MOUSE	Lmnb1	35	-0.0547583	0.656057	0.797052
sp|Q9CR60|GOT1B_MOUSE	Golt1b	1	-0.0555373	0.940923	0.96759
sp|P13439|UMPS_MOUSE	Umps	2	-0.0565177	0.892765	0.940669
sp|Q8C181|MBNL2_MOUSE	Mbnl2	4	-0.0575936	0.295708	0.515211
sp|P26516|PSMD7_MOUSE	Psmd7	2	-0.057957	0.516813	0.698368
sp|P56546|CTBP2_MOUSE	Ctbp2	3	-0.0601399	0.585693	0.745524
sp|Q66GT5|PTPM1_MOUSE	Ptpmt1	4	-0.0611386	0.641844	0.786343
sp|Q61655|DD19A_MOUSE	Ddx19a	4	-0.0615984	0.956799	0.973439
sp|Q8BRT1|CLAP2_MOUSE	Clasp2	24	-0.064747	0.725242	0.848533
sp|Q02053|UBA1_MOUSE	Uba1	14	-0.0652141	0.362821	0.573649
sp|P59999|ARPC4_MOUSE	Arpc4	3	-0.0657441	0.874788	0.933905
sp|Q8BWT1|THIM_MOUSE	Acaa2	2	-0.0663449	0.737318	0.859082
sp|Q9CSH3|RRP44_MOUSE	Dis3	5	-0.0663481	0.655329	0.797052
sp|Q9WUR9|KAD4_MOUSE	Ak4	1	-0.0666712	0.409091	0.614951
sp|Q6DVA0|LEMD2_MOUSE	Lemd2	3	-0.0667062	0.498743	0.686401
sp|Q9QYH6|MAGD1_MOUSE	Maged1	4	-0.0669905	0.814051	0.897564
sp|Q9Z315|SNUT1_MOUSE	Sart1	14	-0.0672584	0.805766	0.895012
sp|P07901|HS90A_MOUSE	Hsp90aa1	14	-0.0684851	0.383792	0.592788
sp|Q60668|HNRPD_MOUSE	Hnrnpd	26	-0.0688684	0.304723	0.522384
sp|O35691|PININ_MOUSE	Pnn	11	-0.0696133	0.900263	0.942557
sp|P39054|DYN2_MOUSE	Dnm2	8	-0.0700796	0.298823	0.517512
sp|Q6A068|CDC5L_MOUSE	Cdc5l	22	-0.0724563	0.52878	0.707055
sp|Q9WTX5|SKP1_MOUSE	Skp1	2	-0.0724606	0.639093	0.784342
sp|Q3TIV5|ZC3HF_MOUSE	Zc3h15	2	-0.0730477	0.343853	0.560707
sp|P18760|COF1_MOUSE	Cfl1	6	-0.0730947	0.868723	0.932747
sp|P60843|IF4A1_MOUSE	Eif4a1	24	-0.075273	0.813283	0.897564
sp|P37040|NCPR_MOUSE	Por	13	-0.0760194	0.529474	0.707308
sp|Q99MJ9|DDX50_MOUSE	Ddx50	15	-0.0761939	0.463148	0.659493
sp|Q9CY57|CHTOP_MOUSE	Chtop	9	-0.0765818	0.35575	0.565412
sp|Q9Z1Q9|SYVC_MOUSE	Vars	19	-0.076898	0.74585	0.862983
sp|Q8K2F8|LS14A_MOUSE	Lsm14a	12	-0.0772187	0.858223	0.927091
sp|Q6P5H2|NEST_MOUSE	Nes	8	-0.0778071	0.296654	0.515473
sp|Q99N87|RT05_MOUSE	Mrps5	2	-0.0786936	0.90191	0.943578
sp|Q8R0X7|SGPL1_MOUSE	Sgpl1	24	-0.0794226	0.656262	0.797052
sp|P26638|SYSC_MOUSE	Sars	5	-0.0795434	0.312756	0.530671
sp|P60122|RUVB1_MOUSE	Ruvbl1	6	-0.079882	0.776032	0.879378
sp|Q3UQ44|IQGA2_MOUSE	Iqgap2	2	-0.0802044	0.843072	0.919448
sp|Q7TMB8|CYFP1_MOUSE	Cyfip1	7	-0.0802853	0.874478	0.933905
sp|O35286|DHX15_MOUSE	Dhx15	35	-0.0812128	0.479044	0.672116
sp|Q78IS1|TMED3_MOUSE	Tmed3	3	-0.0823956	0.651389	0.795261
sp|Q9CRB2|NHP2_MOUSE	Nhp2	3	-0.0824005	0.181469	0.394401
sp|Q9JMH9|MY18A_MOUSE	Myo18a	10	-0.083369	0.550624	0.721401
sp|O55201|SPT5H_MOUSE	Supt5h	3	-0.083728	0.467441	0.66172
sp|O55131|SEPT7_MOUSE	Septin07	21	-0.0852943	0.383151	0.592449
sp|O88532|ZFR_MOUSE	Zfr	24	-0.0860315	0.442883	0.63972
sp|Q9JIK5|DDX21_MOUSE	Ddx21	44	-0.0862822	0.662159	0.799373
sp|Q6ZQ38|CAND1_MOUSE	Cand1	4	-0.0864141	0.906972	0.947683
sp|Q9Z0H4|CELF2_MOUSE	Celf2	3	-0.092183	0.87537	0.933905
sp|Q4VA53|PDS5B_MOUSE	Pds5b	22	-0.0956012	0.210325	0.421851
sp|Q3U1G5|I20L2_MOUSE	Isg20l2	5	-0.0967294	0.433684	0.629022
sp|Q0P678|ZCH18_MOUSE	Zc3h18	5	-0.0971605	0.507445	0.68991
sp|Q99MR6|SRRT_MOUSE	Srrt	7	-0.0974402	0.84095	0.91911
sp|P31786|ACBP_MOUSE	Dbi	1	-0.0975315	0.32119	0.538771
sp|P83940|ELOC_MOUSE	Eloc	2	-0.0997141	0.47897	0.672116
sp|Q8VDD5|MYH9_MOUSE	Myh9	92	-0.0999165	0.433105	0.629022
sp|Q6P4T2|U520_MOUSE	Snrnp200	40	-0.10111	0.430153	0.628445
sp|Q8K224|NAT10_MOUSE	Nat10	3	-0.101192	0.250913	0.469709
sp|Q8CIE6|COPA_MOUSE	Copa	37	-0.101692	0.226143	0.441621
sp|Q8K1M6|DNM1L_MOUSE	Dnm1l	5	-0.10441	0.79742	0.891869
sp|Q9CPW7|ZMAT2_MOUSE	Zmat2	2	-0.104774	0.73806	0.859234
sp|Q9DBL1|ACDSB_MOUSE	Acadsb	2	-0.1054	0.871552	0.933905
sp|P84091|AP2M1_MOUSE	Ap2m1	10	-0.105895	0.326975	0.543282
sp|Q9ESX5|DKC1_MOUSE	Dkc1	9	-0.10596	0.381304	0.592179
sp|Q80V26|IMPA3_MOUSE	Impad1	2	-0.106063	0.637744	0.784342
sp|P35279|RAB6A_MOUSE	Rab6a	11	-0.106338	0.890695	0.939546
sp|Q9DAW9|CNN3_MOUSE	Cnn3	9	-0.107288	0.272943	0.490042
sp|O35492|CLK3_MOUSE	Clk3	2	-0.108535	0.638607	0.784342
sp|P23116|EIF3A_MOUSE	Eif3a	49	-0.10926	0.189401	0.402684
sp|Q8N7N5|DCAF8_MOUSE	Dcaf8	1	-0.110533	0.46128	0.657499
sp|Q8CCJ4|AMER2_MOUSE	Amer2	5	-0.110567	0.245156	0.462013
sp|Q91Z49|UIF_MOUSE	Fyttd1	5	-0.110831	0.234345	0.449481
sp|Q9D071|MMS19_MOUSE	Mms19	1	-0.111797	0.527733	0.706328
sp|Q62261|SPTB2_MOUSE	Sptbn1	15	-0.111814	0.658359	0.797058
sp|Q9DBN5|LONP2_MOUSE	Lonp2	5	-0.113937	0.315061	0.530671
sp|Q6NZC7|S23IP_MOUSE	Sec23ip	2	-0.11405	0.184349	0.397582
sp|Q9JHU4|DYHC1_MOUSE	Dync1h1	102	-0.114804	0.224616	0.441621
sp|P62827|RAN_MOUSE	Ran	16	-0.115153	0.708526	0.835942
sp|Q9R099|TBL2_MOUSE	Tbl2	9	-0.116006	0.436837	0.63294
sp|P54276|MSH6_MOUSE	Msh6	5	-0.118694	0.187462	0.402276
sp|A2AR02|PPIG_MOUSE	Ppig	9	-0.11886	0.379036	0.589331
sp|O54833|CSK22_MOUSE	Csnk2a2	2	-0.118874	0.73943	0.859403
sp|Q9CQS2|NOP10_MOUSE	Nop10	2	-0.118963	0.499557	0.686401
sp|A3KFM7|CHD6_MOUSE	Chd6	2	-0.121642	0.43224	0.629022
sp|Q64511|TOP2B_MOUSE	Top2b	17	-0.122514	0.41166	0.616173
sp|Q61749|EI2BD_MOUSE	Eif2b4	3	-0.122519	0.248672	0.466758
sp|Q9QYA2|TOM40_MOUSE	Tomm40	7	-0.124012	0.476235	0.671319
sp|O08756|HCD2_MOUSE	Hsd17b10	9	-0.124226	0.537649	0.712804
sp|Q922R8|PDIA6_MOUSE	Pdia6	7	-0.125301	0.940611	0.96759
sp|Q9EPU0|RENT1_MOUSE	Upf1	12	-0.125362	0.445509	0.642192
sp|Q9R0H0|ACOX1_MOUSE	Acox1	17	-0.126435	0.255331	0.474394
sp|Q9D0R2|SYTC_MOUSE	Tars	3	-0.126575	0.294787	0.515211
sp|Q8C0C7|SYFA_MOUSE	Farsa	8	-0.126801	0.914575	0.95251
sp|Q91VE0|S27A4_MOUSE	Slc27a4	1	-0.126834	0.228359	0.441621
sp|P16546|SPTN1_MOUSE	Sptan1	4	-0.127642	0.949046	0.971181
sp|P09411|PGK1_MOUSE	Pgk1	6	-0.130513	0.649035	0.793077
sp|Q8C1B7|SEP11_MOUSE	Septin11	12	-0.131361	0.142619	0.34511
sp|Q3UFY8|MRRP1_MOUSE	Trmt10c	3	-0.131765	0.605131	0.76266
sp|P28659|CELF1_MOUSE	Celf1	8	-0.13188	0.124885	0.316496
sp|Q8R2R9|AP3M2_MOUSE	Ap3m2	1	-0.134215	0.129545	0.324208
sp|Q9QWH1|PHC2_MOUSE	Phc2	1	-0.134814	0.350175	0.562885
sp|Q9Z0U1|ZO2_MOUSE	Tjp2	5	-0.135169	0.800908	0.891869
sp|A2AGT5|CKAP5_MOUSE	Ckap5	14	-0.135539	0.303897	0.522241
sp|Q6PE01|SNR40_MOUSE	Snrnp40	9	-0.136517	0.0966983	0.274271
sp|P84089|ERH_MOUSE	Erh	10	-0.137744	0.94209	0.96759
sp|Q9Z1N5|DX39B_MOUSE	Ddx39b	10	-0.138059	0.315227	0.530671
sp|O55028|BCKD_MOUSE	Bckdk	3	-0.140574	0.49905	0.686401
sp|P25976|UBF1_MOUSE	Ubtf	4	-0.140777	0.800094	0.891869
sp|Q61595|KTN1_MOUSE	Ktn1	22	-0.14088	0.398217	0.605739
sp|P28740|KIF2A_MOUSE	Kif2a	12	-0.141741	0.193334	0.405192
sp|P43247|MSH2_MOUSE	Msh2	2	-0.142001	0.399363	0.606824
sp|P97855|G3BP1_MOUSE	G3bp1	14	-0.142388	0.172294	0.383819
sp|G5E870|TRIPC_MOUSE	Trip12	26	-0.143296	0.265664	0.483967
sp|Q61543|GSLG1_MOUSE	Glg1	12	-0.143653	0.502578	0.686401
sp|E9Q5K9|YTDC1_MOUSE	Ythdc1	6	-0.143793	0.382788	0.592449
sp|Q61753|SERA_MOUSE	Phgdh	13	-0.14448	0.800319	0.891869
sp|Q8BMF4|ODP2_MOUSE	Dlat	7	-0.145511	0.284353	0.505357
sp|Q99104|MYO5A_MOUSE	Myo5a	22	-0.146523	0.110728	0.293242
sp|Q61474|MSI1H_MOUSE	Msi1	5	-0.146699	0.150183	0.355576
sp|Q9D0D3|PAPD1_MOUSE	Mtpap	2	-0.146811	0.146855	0.350879
sp|P62137|PP1A_MOUSE	Ppp1ca	1	-0.148047	0.410019	0.615687
sp|P97379|G3BP2_MOUSE	G3bp2	14	-0.148882	0.195553	0.40675
sp|Q8BRF7|SCFD1_MOUSE	Scfd1	2	-0.149353	0.244274	0.460968
sp|Q8JZQ9|EIF3B_MOUSE	Eif3b	14	-0.150343	0.347634	0.562302
sp|Q9CQT2|RBM7_MOUSE	Rbm7	3	-0.150806	0.209375	0.420951
sp|P28658|ATX10_MOUSE	Atxn10	11	-0.151116	0.197877	0.409763
sp|P62141|PP1B_MOUSE	Ppp1cb	11	-0.152565	0.0995503	0.276399
sp|P21619|LMNB2_MOUSE	Lmnb2	2	-0.154748	0.176316	0.38619
sp|Q05816|FABP5_MOUSE	Fabp5	4	-0.158171	0.0863867	0.255799
sp|Q80TV8|CLAP1_MOUSE	Clasp1	6	-0.158288	0.314903	0.530671
sp|Q9QX47|SON_MOUSE	Son	8	-0.160613	0.444996	0.642111
sp|Q9EP97|SENP3_MOUSE	Senp3	3	-0.162471	0.227723	0.441621
sp|Q64378|FKBP5_MOUSE	Fkbp5	2	-0.162978	0.300708	0.519304
sp|P11499|HS90B_MOUSE	Hsp90ab1	42	-0.164646	0.23985	0.455682
sp|Q80VL1|TDRKH_MOUSE	Tdrkh	3	-0.164771	0.0993997	0.276399
sp|Q62188|DPYL3_MOUSE	Dpysl3	3	-0.164803	0.17123	0.383345
sp|P50171|DHB8_MOUSE	Hsd17b8	2	-0.165157	0.364417	0.575525
sp|E1U8D0|SOGA1_MOUSE	Soga1	9	-0.165237	0.133952	0.33169
sp|P49717|MCM4_MOUSE	Mcm4	15	-0.165964	0.291961	0.512537
sp|B2RQC6|PYR1_MOUSE	Cad	9	-0.166512	0.190146	0.402684
sp|O70194|EIF3D_MOUSE	Eif3d	12	-0.166669	0.120742	0.309912
sp|Q6NS46|RRP5_MOUSE	Pdcd11	6	-0.167527	0.362739	0.573649
sp|Q9QYB5|ADDG_MOUSE	Add3	13	-0.168141	0.194932	0.40675
sp|Q9R0B7|ZN346_MOUSE	Znf346	5	-0.1683	0.272731	0.490042
sp|Q9QYC0|ADDA_MOUSE	Add1	11	-0.168744	0.171195	0.383345
sp|P14685|PSMD3_MOUSE	Psmd3	14	-0.169587	0.50086	0.686401
sp|P17182|ENOA_MOUSE	Eno1	11	-0.170417	0.361724	0.573206
sp|P29341|PABP1_MOUSE	Pabpc1	22	-0.171165	0.193479	0.405192
sp|Q8BJ05|ZC3HE_MOUSE	Zc3h14	3	-0.17119	0.890535	0.939546
sp|Q8BNJ2|ATS4_MOUSE	Adamts4	4	-0.174183	0.103837	0.282534
sp|Q9D0F6|RFC5_MOUSE	Rfc5	5	-0.174296	0.0984956	0.276399
sp|Q91VN6|DDX41_MOUSE	Ddx41	4	-0.174541	0.313451	0.530671
sp|P68510|1433F_MOUSE	Ywhah	2	-0.174969	0.200042	0.410612
sp|Q569Z5|DDX46_MOUSE	Ddx46	15	-0.176223	0.081246	0.247994
sp|Q62241|RU1C_MOUSE	Snrpc	8	-0.17838	0.199509	0.410118
sp|P51660|DHB4_MOUSE	Hsd17b4	22	-0.179078	0.317692	0.534136
sp|Q99P72|RTN4_MOUSE	Rtn4	6	-0.180001	0.350057	0.562885
sp|Q9DBZ5|EIF3K_MOUSE	Eif3k	2	-0.180088	0.158006	0.367285
sp|P27546|MAP4_MOUSE	Map4	35	-0.180167	0.867634	0.932747
sp|P63073|IF4E_MOUSE	Eif4e	3	-0.183489	0.224627	0.441621
sp|Q3UJB9|EDC4_MOUSE	Edc4	4	-0.184382	0.0928228	0.267056
sp|Q812A2|SRGP3_MOUSE	Srgap3	3	-0.187116	0.584732	0.745524
sp|Q8CH18|CCAR1_MOUSE	Ccar1	16	-0.188412	0.526626	0.706328
sp|P61161|ARP2_MOUSE	Actr2	5	-0.189054	0.05719	0.201746
sp|Q61879|MYH10_MOUSE	Myh10	12	-0.192392	0.150081	0.355576
sp|Q9JIF0|ANM1_MOUSE	Prmt1	6	-0.19287	0.346377	0.561563
sp|P62305|RUXE_MOUSE	Snrpe	2	-0.193173	0.0700004	0.226846
sp|Q91VU0|FAM3C_MOUSE	Fam3c	2	-0.193346	0.289703	0.510944
sp|Q8BP47|SYNC_MOUSE	Nars	12	-0.194372	0.110906	0.293242
sp|Q9CPQ3|TOM22_MOUSE	Tomm22	2	-0.194465	0.455088	0.653317
sp|Q60875|ARHG2_MOUSE	Arhgef2	2	-0.199228	0.813195	0.897564
sp|Q80SW1|SAHH2_MOUSE	Ahcyl1	17	-0.201119	0.134705	0.332406
sp|Q5HZJ0|RNC_MOUSE	Drosha	2	-0.201576	0.756344	0.867571
sp|O89086|RBM3_MOUSE	Rbm3	6	-0.201777	0.0365775	0.164599
sp|P97310|MCM2_MOUSE	Mcm2	9	-0.20839	0.816865	0.899513
sp|Q02248|CTNB1_MOUSE	Ctnnb1	3	-0.209352	0.0884379	0.258681
sp|O55029|COPB2_MOUSE	Copb2	3	-0.209504	0.0987549	0.276399
sp|P62309|RUXG_MOUSE	Snrpg	2	-0.209878	0.573396	0.740614
sp|Q91VC3|IF4A3_MOUSE	Eif4a3	17	-0.212007	0.183731	0.397582
sp|Q9DAW6|PRP4_MOUSE	Prpf4	9	-0.215595	0.367221	0.576925
sp|Q62203|SF3A2_MOUSE	Sf3a2	2	-0.215756	0.787677	0.885028
sp|Q9Z1Z2|STRAP_MOUSE	Strap	4	-0.216098	0.239425	0.455492
sp|Q9CY66|GAR1_MOUSE	Gar1	3	-0.217811	0.135188	0.332406
sp|Q68FD5|CLH1_MOUSE	Cltc	41	-0.218049	0.0920745	0.265447
sp|A2AJI0|MA7D1_MOUSE	Map7d1	12	-0.219764	0.0688887	0.225981
sp|P35585|AP1M1_MOUSE	Ap1m1	3	-0.220817	0.244011	0.460968
sp|Q8CIB5|FERM2_MOUSE	Fermt2	8	-0.220863	0.0933373	0.26744
sp|Q9Z108|STAU1_MOUSE	Stau1	18	-0.221962	0.0842623	0.253326
sp|Q8BG32|PSD11_MOUSE	Psmd11	3	-0.222993	0.461113	0.657499
sp|Q99PV0|PRP8_MOUSE	Prpf8	52	-0.223425	0.223009	0.440372
sp|O08553|DPYL2_MOUSE	Dpysl2	11	-0.223555	0.082686	0.250615
sp|Q62095|DDX3Y_MOUSE	Ddx3y	2	-0.226483	0.388477	0.596089
sp|P61750|ARF4_MOUSE	Arf4	5	-0.227553	0.409092	0.614951
sp|Q922U1|PRPF3_MOUSE	Prpf3	13	-0.228347	0.0871253	0.255908
sp|Q99M28|RNPS1_MOUSE	Rnps1	7	-0.23269	0.0975324	0.275654
sp|P70257|NFIX_MOUSE	Nfix	3	-0.234942	0.679081	0.814897
sp|P30416|FKBP4_MOUSE	Fkbp4	2	-0.235086	0.563752	0.730847
sp|Q80WV3|CHST2_MOUSE	Chst2	9	-0.235093	0.188672	0.402276
sp|Q9CZU3|SK2L2_MOUSE	Skiv2l2	3	-0.235517	0.991574	0.99278
sp|D3YXK2|SAFB1_MOUSE	Safb	23	-0.236841	0.136868	0.334779
sp|E9PVA8|GCN1_MOUSE	Gcn1	34	-0.239257	0.103303	0.282422
sp|Q921L3|TMCO1_MOUSE	Tmco1	6	-0.239335	0.893891	0.940669
sp|Q920B9|SP16H_MOUSE	Supt16h	9	-0.240283	0.218466	0.433841
sp|P40124|CAP1_MOUSE	Cap1	6	-0.241402	0.15202	0.358715
sp|Q5SU73|COIL_MOUSE	Coil	1	-0.242356	0.118134	0.305053
sp|Q80U93|NU214_MOUSE	Nup214	2	-0.243484	0.620978	0.773014
sp|Q6R5N8|TLR13_MOUSE	Tlr13	1	-0.245605	0.566218	0.732692
sp|Q91W39|NCOA5_MOUSE	Ncoa5	9	-0.247269	0.0463842	0.184486
sp|Q07813|BAX_MOUSE	Bax	1	-0.247821	0.684599	0.818023
sp|P60824|CIRBP_MOUSE	Cirbp	9	-0.249856	0.310542	0.529127
sp|B2RVL6|ZCH24_MOUSE	Zcchc24	3	-0.250907	0.0487281	0.187436
sp|P58252|EF2_MOUSE	Eef2	20	-0.251319	0.42212	0.622538
sp|Q9QZE5|COPG1_MOUSE	Copg1	3	-0.25212	0.285923	0.507504
sp|Q99PL5|RRBP1_MOUSE	Rrbp1	79	-0.255851	0.0521435	0.193165
sp|Q9QXB9|DRG2_MOUSE	Drg2	1	-0.255906	0.166282	0.380849
sp|Q8VCB1|NDC1_MOUSE	Ndc1	3	-0.256397	0.0901084	0.263019
sp|Q01279|EGFR_MOUSE	Egfr	5	-0.257297	0.149098	0.354802
sp|Q8K3G9|DP13B_MOUSE	Appl2	8	-0.258852	0.0975783	0.275654
sp|P62962|PROF1_MOUSE	Pfn1	2	-0.261371	0.479363	0.672116
sp|O35857|TIM44_MOUSE	Timm44	2	-0.267414	0.251701	0.469845
sp|Q921F4|HNRLL_MOUSE	Hnrnpll	20	-0.270658	0.0537164	0.19513
sp|Q9CZD5|IF3M_MOUSE	Mtif3	5	-0.270682	0.0638934	0.216403
sp|Q9CXS4|CENPV_MOUSE	Cenpv	10	-0.27185	0.578909	0.743721
sp|Q9Z321|TOP3B_MOUSE	Top3b	6	-0.272455	0.072907	0.230047
sp|Q9WTX2|PRKRA_MOUSE	Prkra	15	-0.273034	0.108473	0.28847
sp|Q8K2C9|HACD3_MOUSE	Hacd3	3	-0.273177	0.771759	0.877844
sp|P42227|STAT3_MOUSE	Stat3	9	-0.275495	0.0715308	0.228969
sp|Q8C8R3|ANK2_MOUSE	Ank2	34	-0.276685	0.202884	0.413423
sp|Q6PGH1|BUD31_MOUSE	Bud31	2	-0.277518	0.76202	0.871944
sp|O54836|ZMAT3_MOUSE	Zmat3	5	-0.281062	0.0429002	0.175603
sp|Q9DCH4|EIF3F_MOUSE	Eif3f	7	-0.28348	0.0739497	0.231439
sp|Q9JKV1|ADRM1_MOUSE	Adrm1	2	-0.283839	0.218282	0.433841
sp|O08788|DCTN1_MOUSE	Dctn1	5	-0.283968	0.0321843	0.156899
sp|Q91WK2|EIF3H_MOUSE	Eif3h	4	-0.285928	0.156177	0.36424
sp|P63087|PP1G_MOUSE	Ppp1cc	2	-0.288819	0.0473201	0.185563
sp|Q61656|DDX5_MOUSE	Ddx5	45	-0.290561	0.0663541	0.219203
sp|Q810A7|DDX42_MOUSE	Ddx42	6	-0.291026	0.6203	0.773014
sp|Q9Z1T1|AP3B1_MOUSE	Ap3b1	2	-0.292351	0.578979	0.743721
sp|Q9EQM6|DGCR8_MOUSE	Dgcr8	2	-0.294514	0.0236577	0.134403
sp|Q99LH1|NOG2_MOUSE	Gnl2	2	-0.298279	0.341883	0.558143
sp|Q8CFQ3|AQR_MOUSE	Aqr	4	-0.306416	0.0168936	0.115259
sp|Q61464|ZN638_MOUSE	Znf638	11	-0.307221	0.024621	0.138271
sp|Q3TCH7|CUL4A_MOUSE	Cul4a	1	-0.307868	0.191741	0.403605
sp|Q76MZ3|2AAA_MOUSE	Ppp2r1a	4	-0.311923	0.0461044	0.183894
sp|Q5SFM8|RBM27_MOUSE	Rbm27	2	-0.315072	0.22506	0.441621
sp|Q8QZY1|EIF3L_MOUSE	Eif3l	10	-0.315473	0.051411	0.191089
sp|P52480|KPYM_MOUSE	Pkm	27	-0.316337	0.0424681	0.175102
sp|Q9JIX8|ACINU_MOUSE	Acin1	13	-0.316542	0.0641808	0.216403
sp|O70251|EF1B_MOUSE	Eef1b	4	-0.318481	0.378676	0.589331
sp|Q8K1N4|SPAS2_MOUSE	Spats2	7	-0.318725	0.104624	0.283576
sp|P42208|SEPT2_MOUSE	Septin02	15	-0.319673	0.0161136	0.113076
sp|P60229|EIF3E_MOUSE	Eif3e	8	-0.320452	0.0344956	0.16077
sp|Q80UG5|SEPT9_MOUSE	Septin09	26	-0.322628	0.0117006	0.100241
sp|Q9WUK2|IF4H_MOUSE	Eif4h	3	-0.324792	0.206519	0.417139
sp|Q9D7B1|DUS2L_MOUSE	Dus2	1	-0.327623	0.387869	0.596089
sp|P47754|CAZA2_MOUSE	Capza2	3	-0.333761	0.0625554	0.214738
sp|O08579|EMD_MOUSE	Emd	4	-0.33486	0.630671	0.780143
sp|Q9D0D5|T2EA_MOUSE	Gtf2e1	2	-0.340078	0.499495	0.686401
sp|Q8CH25|SLTM_MOUSE	Sltm	21	-0.341592	0.0468888	0.184581
sp|Q9QYG0|NDRG2_MOUSE	Ndrg2	1	-0.342733	0.0344731	0.16077
sp|P62307|RUXF_MOUSE	Snrpf	2	-0.345277	0.0223686	0.129775
sp|Q3UKJ7|SMU1_MOUSE	Smu1	3	-0.34537	0.124527	0.316159
sp|B1AZI6|THOC2_MOUSE	Thoc2	5	-0.34789	0.0805524	0.247474
sp|Q921M3|SF3B3_MOUSE	Sf3b3	12	-0.351112	0.00895931	0.0892119
sp|P16858|G3P_MOUSE	Gapdh	22	-0.351209	0.0159673	0.113076
sp|Q3TJZ6|FA98A_MOUSE	Fam98a	4	-0.353221	0.254057	0.473071
sp|Q99KP6|PRP19_MOUSE	Prpf19	17	-0.353239	0.00947872	0.0911515
sp|Q80W00|PP1RA_MOUSE	Ppp1r10	4	-0.35904	0.590474	0.749571
sp|P11214|TPA_MOUSE	Plat	10	-0.363168	0.0198049	0.12273
sp|P12382|PFKAL_MOUSE	Pfkl	1	-0.376398	0.22589	0.441621
sp|Q6P9S0|MTSSL_MOUSE	Mtss1l	6	-0.377106	0.0179806	0.117417
sp|P35601|RFC1_MOUSE	Rfc1	5	-0.377677	0.0227395	0.131384
sp|Q923D4|SF3B5_MOUSE	Sf3b5	2	-0.379566	0.0995798	0.276399
sp|P62315|SMD1_MOUSE	Snrpd1	4	-0.380218	0.0303512	0.152735
sp|Q99LE6|ABCF2_MOUSE	Abcf2	1	-0.381524	0.188818	0.402276
sp|Q80XP8|FA76B_MOUSE	Fam76b	3	-0.386797	0.771033	0.877844
sp|Q8VHK9|DHX36_MOUSE	Dhx36	13	-0.388113	0.227009	0.441621
sp|Q99NB9|SF3B1_MOUSE	Sf3b1	34	-0.400275	0.00769548	0.0819351
sp|Q9CSN1|SNW1_MOUSE	Snw1	2	-0.401701	0.0384046	0.167454
sp|Q8K4Z5|SF3A1_MOUSE	Sf3a1	3	-0.402396	0.00505781	0.0680732
sp|Q9DCD2|SYF1_MOUSE	Xab2	3	-0.408776	0.594305	0.750364
sp|Q9CPZ6|ORML3_MOUSE	Ormdl3	1	-0.416533	0.170387	0.383334
sp|O55222|ILK_MOUSE	Ilk	9	-0.41927	0.0158287	0.113076
sp|Q80YR5|SAFB2_MOUSE	Safb2	9	-0.421382	0.133695	0.33169
sp|P62317|SMD2_MOUSE	Snrpd2	10	-0.430113	0.0210304	0.126182
sp|Q08943|SSRP1_MOUSE	Ssrp1	1	-0.431009	0.52387	0.70519
sp|Q9D952|EVPL_MOUSE	Evpl	2	-0.433132	0.634037	0.783616
sp|Q91W18|TDRD3_MOUSE	Tdrd3	10	-0.435724	0.00969426	0.0925901
sp|Q8VCH8|UBXN4_MOUSE	Ubxn4	4	-0.436294	0.0111336	0.0987426
sp|Q922P9|GLYR1_MOUSE	Glyr1	18	-0.437291	0.00708001	0.080164
sp|Q810B6|ANFY1_MOUSE	Ankfy1	7	-0.437764	0.0355658	0.162263
sp|Q6P5F9|XPO1_MOUSE	Xpo1	6	-0.43793	0.0290058	0.15083
sp|P47740|AL3A2_MOUSE	Aldh3a2	3	-0.439029	0.378901	0.589331
sp|Q8C854|MYEF2_MOUSE	Myef2	50	-0.447796	0.0110508	0.0987426
sp|Q8BM55|TM214_MOUSE	Tmem214	2	-0.448184	0.515132	0.696768
sp|Q9CWX4|RUSD4_MOUSE	Rpusd4	2	-0.462054	0.0084953	0.0877015
sp|Q8CB77|ELOA1_MOUSE	Eloa	4	-0.479402	0.23582	0.451693
sp|Q9DCE5|PK1IP_MOUSE	Pak1ip1	5	-0.479799	0.0250922	0.138777
sp|Q99P88|NU155_MOUSE	Nup155	2	-0.491309	0.25199	0.469845
sp|P62869|ELOB_MOUSE	Elob	3	-0.492764	0.0850871	0.253636
sp|P17751|TPIS_MOUSE	Tpi1	3	-0.495921	0.688389	0.820457
sp|P52479|UBP10_MOUSE	Usp10	3	-0.506901	0.00982866	0.0928404
sp|Q6NZF1|ZC11A_MOUSE	Zc3h11a	5	-0.510365	0.0377357	0.165398
sp|Q8VH51|RBM39_MOUSE	Rbm39	12	-0.516168	0.00163309	0.0342218
sp|Q9R1C7|PR40A_MOUSE	Prpf40a	9	-0.518902	0.0830343	0.25071
sp|Q8BFY9|TNPO1_MOUSE	Tnpo1	9	-0.526032	0.0642803	0.216403
sp|Q9CPN8|IF2B3_MOUSE	Igf2bp3	4	-0.528908	0.0137832	0.108744
sp|Q9Z0L8|GGH_MOUSE	Ggh	1	-0.530212	0.365532	0.57599
sp|Q9D0E1|HNRPM_MOUSE	Hnrnpm	62	-0.530916	0.00173464	0.0343018
sp|P61982|1433G_MOUSE	Ywhag	2	-0.546585	0.00158934	0.0338097
sp|Q91WJ7|SPS2L_MOUSE	Spats2l	7	-0.547718	0.0321745	0.156899
sp|Q6A065|CE170_MOUSE	Cep170	4	-0.562513	0.00311543	0.0489805
sp|Q497V5|SRBD1_MOUSE	Srbd1	23	-0.564114	0.00371015	0.0553025
sp|Q8BU30|SYIC_MOUSE	Iars	10	-0.565833	0.00145655	0.0329414
sp|O35144|TERF2_MOUSE	Terf2	3	-0.57439	0.00171003	0.0343018
sp|Q64213|SF01_MOUSE	Sf1	11	-0.577945	0.00566342	0.0716345
sp|Q9WVR4|FXR2_MOUSE	Fxr2	12	-0.606075	0.00313977	0.0489805
sp|Q6A0A9|F120A_MOUSE	FAM120A	35	-0.625697	0.00172135	0.0343018
sp|P35922|FMR1_MOUSE	Fmr1	20	-0.635262	0.00241653	0.0434976
sp|Q91V81|RBM42_MOUSE	Rbm42	3	-0.638491	0.00302861	0.0488755
sp|Q99JX4|EIF3M_MOUSE	Eif3m	3	-0.651095	0.126699	0.318791
sp|Q8CHH9|SEPT8_MOUSE	Septin08	3	-0.656292	0.00929939	0.0908348
sp|P62320|SMD3_MOUSE	Snrpd3	8	-0.656908	0.00301061	0.0488755
sp|O35343|IMA3_MOUSE	Kpna4	2	-0.670711	0.260024	0.480154
sp|O08848|RO60_MOUSE	Trove2	4	-0.672932	0.0060071	0.0725963
sp|Q8BGH4|REEP1_MOUSE	Reep1	2	-0.673694	0.111219	0.293517
sp|P18242|CATD_MOUSE	Ctsd	2	-0.690203	0.0848081	0.253636
sp|Q922V4|PLRG1_MOUSE	Plrg1	3	-0.691216	0.0169933	0.115259
sp|Q8BZ20|PAR12_MOUSE	Parp12	4	-0.724447	0.000746379	0.021386
sp|Q8BK64|AHSA1_MOUSE	Ahsa1	2	-0.728003	0.536531	0.712667
sp|P61205|ARF3_MOUSE	Arf3	2	-0.739679	0.0393663	0.168195
sp|Q8CGC7|SYEP_MOUSE	Eprs	68	-0.771551	0.000738368	0.021386
sp|Q61584|FXR1_MOUSE	Fxr1	32	-0.775628	0.00142429	0.0329414
sp|Q9D023|MPC2_MOUSE	Mpc2	1	-0.78759	0.172862	0.383819
sp|Q61937|NPM_MOUSE	Npm1	17	-0.788254	0.00565301	0.0716345
sp|Q91VI7|RINI_MOUSE	Rnh1	1	-0.798739	0.087965	0.257835
sp|P27048|RSMB_MOUSE	Snrpb	7	-0.806316	0.00024062	0.00965232
sp|Q9CPS7|PNO1_MOUSE	Pno1	1	-0.84738	0.000288468	0.0106581
sp|Q8BMJ2|SYLC_MOUSE	Lars	14	-0.84993	0.00109128	0.0268799
sp|Q8C5N3|CWC22_MOUSE	Cwc22	1	-0.852854	0.167186	0.382294
sp|Q9CZU6|CISY_MOUSE	Cs	17	-0.866784	0.00262092	0.0459972
sp|Q8QZY9|SF3B4_MOUSE	Sf3b4	2	-0.871749	0.0180694	0.117451
sp|Q80UP3|DGKZ_MOUSE	Dgkz	1	-0.922245	0.188015	0.402276
sp|P28660|NCKP1_MOUSE	Nckap1	1	-0.930028	0.111753	0.294373
sp|Q9D1M4|MCA3_MOUSE	Eef1e1	6	-0.945158	0.00039363	0.0134794
sp|Q99K48|NONO_MOUSE	Nono	40	-0.955728	0.000909618	0.0245597
sp|Q8VIJ6|SFPQ_MOUSE	Sfpq	53	-0.956051	0.00032358	0.0116489
sp|Q5SUQ9|CTC1_MOUSE	Ctc1	1	-1.03012	0.0722113	0.229897
sp|Q68FL6|SYMC_MOUSE	Mars	22	-1.03212	0.000226687	0.00936084
sp|Q99NB8|UBQL4_MOUSE	Ubqln4	1	-1.04381	0.203335	0.413743
sp|Q9ES97|RTN3_MOUSE	Rtn3	1	-1.18411	0.0733819	0.230488
sp|Q922B2|SYDC_MOUSE	Dars	22	-1.1888	0.000355885	0.0124916
sp|P62313|LSM6_MOUSE	Lsm6	2	-1.20489	0.00169589	0.0343018
sp|Q8BZX4|SREK1_MOUSE	Srek1	4	-1.23423	0.000133242	0.0073309
sp|Q8VDJ3|VIGLN_MOUSE	Hdlbp	58	-1.27358	1.69009e-05	0.00131827
sp|P60335|PCBP1_MOUSE	Pcbp1	12	-1.27853	1.02153e-05	0.000896394
sp|P31230|AIMP1_MOUSE	Aimp1	14	-1.28067	0.00102685	0.0262128
sp|Q9QUM9|PSA6_MOUSE	Psma6	1	-1.31165	0.098992	0.276399
sp|Q8R010|AIMP2_MOUSE	Aimp2	7	-1.31186	0.000112796	0.00659855
sp|Q6PHZ5|RB15B_MOUSE	Rbm15b	9	-1.32131	0.000179997	0.00868742
sp|Q9D883|U2AF1_MOUSE	U2af1	15	-1.32229	4.84514e-05	0.00315295
sp|Q9D0I9|SYRC_MOUSE	Rars	23	-1.33687	0.000135757	0.0073309
sp|Q8C3F2|F120C_MOUSE	Fam120c	32	-1.38507	1.63699e-05	0.00131827
sp|P61979|HNRPK_MOUSE	Hnrnpk	34	-1.40826	5.07502e-06	0.000664656
sp|Q64012|RALY_MOUSE	Raly	19	-1.48205	3.88748e-05	0.002809
sp|Q9QXA5|LSM4_MOUSE	Lsm4	7	-1.51618	4.94053e-05	0.00315295
sp|P50543|S10AB_MOUSE	S100a11	1	-1.57073	0.127437	0.320075
sp|P62322|LSM5_MOUSE	Lsm5	1	-1.68705	0.0013047	0.0310474
sp|Q99MN1|SYK_MOUSE	Kars	33	-1.70903	5.20742e-06	0.000664656
sp|Q3UEB3|PUF60_MOUSE	Puf60	12	-1.75236	6.619e-06	0.000707416
sp|Q8BLY2|SYTC2_MOUSE	Tarsl2	4	-1.75901	9.50053e-05	0.00579945
sp|Q9D8T7|SLIRP_MOUSE	Slirp	9	-1.83901	7.054e-06	0.000707416
sp|P26369|U2AF2_MOUSE	U2af2	15	-1.84955	6.28361e-06	0.000707416
sp|Q6PB66|LPPRC_MOUSE	Lrpprc	82	-1.85621	8.71819e-06	0.000816022
sp|Q9Z204|HNRPC_MOUSE	Hnrnpc	25	-1.94871	4.39639e-06	0.000664656
sp|O35900|LSM2_MOUSE	Lsm2	3	-1.95541	0.00026429	0.0100287
sp|Q61990|PCBP2_MOUSE	Pcbp2	15	-2.04352	3.96358e-07	0.000111297
sp|Q8BGJ9|U2AF4_MOUSE	U2af1l4	3	-2.06901	4.00142e-05	0.002809
sp|Q6ZWM4|LSM8_MOUSE	Lsm8	4	-2.14348	0.000142428	0.00740626
sp|Q8BHD7|PTBP3_MOUSE	Ptbp3	9	-2.22616	8.19533e-07	0.000174339
sp|P06151|LDHA_MOUSE	Ldha	1	-2.23859	0.345921	0.561563
sp|Q8K310|MATR3_MOUSE	Matr3	56	-2.25465	1.89341e-07	8.86116e-05
sp|P62311|LSM3_MOUSE	Lsm3	3	-2.31876	8.84521e-07	0.000174339
sp|P70318|TIAR_MOUSE	Tial1	8	-2.65287	9.93383e-07	0.000174339
sp|P16125|LDHB_MOUSE	Ldhb	1	-2.9989	0.140728	0.341838
sp|Q04690|NF1_MOUSE	Nf1	1	-3.06626	0.10062	0.277
sp|P17225|PTBP1_MOUSE	Ptbp1	27	-3.29913	3.75967e-07	0.000111297
sp|Q91Z31|PTBP2_MOUSE	Ptbp2	24	-3.75985	1.66669e-07	8.86116e-05
sp|P70372|ELAV1_MOUSE	Elavl1	23	-3.91448	9.7632e-09	1.37075e-05
sp|O35382|EXOC4_MOUSE	Exoc4	1	-6.36003	0.0569205	0.201401

## Sheet: NFIB 5' UTR vs hybr.RNA curated
NFIB 5' UTR vs hybrid RNA minus bead binding proteins															5' UTR - hairpin core									5' UTR Flanking									AR ctrl
proteinName	geneName	nbPeptides	log2ratio_5p_PD	pValue_5p_PD	qValue_5p_PD							#	proteinName	geneName	nbPeptides	log2ratio_5p_PD	pValue_5p_PD	qValue_5p_PD				proteinName	geneName	nbPeptides	log2ratio_5p_PD	pValue_5p_PD	qValue_5p_PD				proteinName	geneName	nbPeptides	log2ratio_5p_PD	pValue_5p_PD	qValue_5p_PD
sp|B2RY56|RBM25_MOUSE	Rbm25	10	1.48722	0.00392541	0.0562375		Legend:		5' UTR - hairpin core			1	sp|B2RY56|RBM25_MOUSE	Rbm25	10	1.48722	0.00392541	0.0562375				sp|Q8K003|TMA7_MOUSE	Tma7	6	1.07183	0.0279435	0.148209				sp|Q68FL6|SYMC_MOUSE	Mars	22	-1.03212	0.000226687	0.00936084
sp|P42669|PURA_MOUSE	Pura	9	1.25651	0.00108283	0.0268799			bold	5' UTR Flanking			2	sp|P42669|PURA_MOUSE	Pura	9	1.25651	0.00108283	0.0268799				sp|Q9JMG1|EDF1_MOUSE	Edf1	5	0.993286	0.00588718	0.0725963				sp|Q922B2|SYDC_MOUSE	Dars	22	-1.1888	0.000355885	0.0124916
sp|O88569|ROA2_MOUSE	Hnrnpa2b1	38	1.06126	0.000150064	0.00752466			blue	AR ctrl			3	sp|O88569|ROA2_MOUSE	Hnrnpa2b1	38	1.06126	0.000150064	0.00752466				sp|P09405|NUCL_MOUSE	Ncl	58	0.981187	0.000185629	0.00868742				sp|Q8BZX4|SREK1_MOUSE	Srek1	4	-1.23423	0.000133242	0.0073309
sp|Q01853|TERA_MOUSE	Vcp	4	1.02705	0.000453412	0.0151569							4	sp|Q01853|TERA_MOUSE	Vcp	4	1.02705	0.000453412	0.0151569				sp|Q9CPP6|NDUA5_MOUSE	Ndufa5	4	0.842402	0.0106048	0.0964839				sp|Q8VDJ3|VIGLN_MOUSE	Hdlbp	58	-1.27358	1.69009e-05	0.00131827
sp|O35295|PURB_MOUSE	Purb	13	1.02072	0.000577316	0.0184216							5	sp|O35295|PURB_MOUSE	Purb	13	1.02072	0.000577316	0.0184216				sp|P84099|RL19_MOUSE	Rpl19	15	0.841417	0.00800888	0.0832923				sp|P60335|PCBP1_MOUSE	Pcbp1	12	-1.27853	1.02153e-05	0.000896394
sp|Q8K003|TMA7_MOUSE	Tma7	6	1.07183	0.0279435	0.148209																	sp|Q7TMK9|HNRPQ_MOUSE	Syncrip	42	0.83983	0.000199676	0.00881662				sp|P31230|AIMP1_MOUSE	Aimp1	14	-1.28067	0.00102685	0.0262128
sp|Q9JMG1|EDF1_MOUSE	Edf1	5	0.993286	0.00588718	0.0725963																	sp|P49312|ROA1_MOUSE	Hnrnpa1	32	0.813856	0.000709685	0.021386				sp|Q8R010|AIMP2_MOUSE	Aimp2	7	-1.31186	0.000112796	0.00659855
sp|P09405|NUCL_MOUSE	Ncl	58	0.981187	0.000185629	0.00868742																	sp|O54879|HMGB3_MOUSE	Hmgb3	6	0.795839	0.000530901	0.0173345				sp|Q6PHZ5|RB15B_MOUSE	Rbm15b	9	-1.32131	0.000179997	0.00868742
sp|Q9CPP6|NDUA5_MOUSE	Ndufa5	4	0.842402	0.0106048	0.0964839																	sp|Q8BG05|ROA3_MOUSE	Hnrnpa3	36	0.783169	0.000209618	0.00891831				sp|Q9D883|U2AF1_MOUSE	U2af1	15	-1.32229	4.84514e-05	0.00315295
sp|P84099|RL19_MOUSE	Rpl19	15	0.841417	0.00800888	0.0832923																	sp|P19783|COX41_MOUSE	Cox4i1	6	0.772994	0.0393156	0.168195				sp|Q9D0I9|SYRC_MOUSE	Rars	23	-1.33687	0.000135757	0.0073309
sp|Q7TMK9|HNRPQ_MOUSE	Syncrip	42	0.83983	0.000199676	0.00881662																	sp|Q80W54|FACE1_MOUSE	Zmpste24	4	0.771537	0.272168	0.489902				sp|Q8C3F2|F120C_MOUSE	Fam120c	32	-1.38507	1.63699e-05	0.00131827
sp|P49312|ROA1_MOUSE	Hnrnpa1	32	0.813856	0.000709685	0.021386																	sp|P56382|ATP5E_MOUSE	Atp5e	4	0.766903	0.0186447	0.11953				sp|P61979|HNRPK_MOUSE	Hnrnpk	34	-1.40826	5.07502e-06	0.000664656
sp|O54879|HMGB3_MOUSE	Hmgb3	6	0.795839	0.000530901	0.0173345																	sp|Q9ERS2|NDUAD_MOUSE	Ndufa13	4	0.760328	0.0164501	0.113216				sp|Q64012|RALY_MOUSE	Raly	19	-1.48205	3.88748e-05	0.002809
sp|Q8BG05|ROA3_MOUSE	Hnrnpa3	36	0.783169	0.000209618	0.00891831																	sp|P62858|RS28_MOUSE	Rps28	6	0.753001	0.000255835	0.00997756				sp|Q9QXA5|LSM4_MOUSE	Lsm4	7	-1.51618	4.94053e-05	0.00315295
sp|P19783|COX41_MOUSE	Cox4i1	6	0.772994	0.0393156	0.168195																	sp|P63323|RS12_MOUSE	Rps12	5	0.7448	0.0478974	0.186688				sp|Q99MN1|SYK_MOUSE	Kars	33	-1.70903	5.20742e-06	0.000664656
sp|Q80W54|FACE1_MOUSE	Zmpste24	4	0.771537	0.272168	0.489902																	sp|Q9JKB3|YBOX3_MOUSE	Ybx3	7	0.74001	0.0027505	0.0469602				sp|Q3UEB3|PUF60_MOUSE	Puf60	12	-1.75236	6.619e-06	0.000707416
sp|P56382|ATP5E_MOUSE	Atp5e	4	0.766903	0.0186447	0.11953																	sp|P30681|HMGB2_MOUSE	Hmgb2	13	0.73923	0.00200569	0.0380539				sp|Q8BLY2|SYTC2_MOUSE	Tarsl2	4	-1.75901	9.50053e-05	0.00579945
sp|Q9ERS2|NDUAD_MOUSE	Ndufa13	4	0.760328	0.0164501	0.113216																	sp|O08739|AMPD3_MOUSE	Ampd3	5	0.728668	0.0828242	0.250615				sp|Q9D8T7|SLIRP_MOUSE	Slirp	9	-1.83901	7.054e-06	0.000707416
sp|P62858|RS28_MOUSE	Rps28	6	0.753001	0.000255835	0.00997756																	sp|Q921T2|TOIP1_MOUSE	Tor1aip1	4	0.725533	0.019802	0.12273				sp|P26369|U2AF2_MOUSE	U2af2	15	-1.84955	6.28361e-06	0.000707416
sp|P63323|RS12_MOUSE	Rps12	5	0.7448	0.0478974	0.186688																	sp|Q61545|EWS_MOUSE	Ewsr1	4	0.723452	0.00687601	0.0787151				sp|Q6PB66|LPPRC_MOUSE	Lrpprc	82	-1.85621	8.71819e-06	0.000816022
sp|Q9JKB3|YBOX3_MOUSE	Ybx3	7	0.74001	0.0027505	0.0469602																	sp|Q9DCJ5|NDUA8_MOUSE	Ndufa8	9	0.708012	0.0154687	0.113076				sp|Q9Z204|HNRPC_MOUSE	Hnrnpc	25	-1.94871	4.39639e-06	0.000664656
sp|P30681|HMGB2_MOUSE	Hmgb2	13	0.73923	0.00200569	0.0380539																	sp|P18608|HMGN1_MOUSE	Hmgn1	8	0.696364	0.00360915	0.0544865				sp|Q61990|PCBP2_MOUSE	Pcbp2	15	-2.04352	3.96358e-07	0.000111297
sp|O08739|AMPD3_MOUSE	Ampd3	5	0.728668	0.0828242	0.250615																	sp|Q99LY9|NDUS5_MOUSE	Ndufs5	6	0.692697	0.0436018	0.177441				sp|Q6ZWM4|LSM8_MOUSE	Lsm8	4	-2.14348	0.000142428	0.00740626
sp|Q921T2|TOIP1_MOUSE	Tor1aip1	4	0.725533	0.019802	0.12273																	sp|Q91YT0|NDUV1_MOUSE	Ndufv1	20	0.689254	0.0143337	0.109372				sp|Q8BHD7|PTBP3_MOUSE	Ptbp3	9	-2.22616	8.19533e-07	0.000174339
sp|Q61545|EWS_MOUSE	Ewsr1	4	0.723452	0.00687601	0.0787151																	sp|O55126|NIPS2_MOUSE	Gbas	10	0.683596	0.00728775	0.0812064				sp|Q8K310|MATR3_MOUSE	Matr3	56	-2.25465	1.89341e-07	8.86116e-05
sp|Q9DCJ5|NDUA8_MOUSE	Ndufa8	9	0.708012	0.0154687	0.113076																	sp|Q78PY7|SND1_MOUSE	Snd1	44	0.67744	0.0491718	0.188112				sp|P70318|TIAR_MOUSE	Tial1	8	-2.65287	9.93383e-07	0.000174339
sp|P18608|HMGN1_MOUSE	Hmgn1	8	0.696364	0.00360915	0.0544865																	sp|Q9CPQ1|COX6C_MOUSE	Cox6c	7	0.671305	0.0235164	0.134403				sp|P17225|PTBP1_MOUSE	Ptbp1	27	-3.29913	3.75967e-07	0.000111297
sp|Q99LY9|NDUS5_MOUSE	Ndufs5	6	0.692697	0.0436018	0.177441																	sp|Q8CI11|GNL3_MOUSE	Gnl3	4	0.670737	0.00198508	0.0380539				sp|Q91Z31|PTBP2_MOUSE	Ptbp2	24	-3.75985	1.66669e-07	8.86116e-05
sp|Q91YT0|NDUV1_MOUSE	Ndufv1	20	0.689254	0.0143337	0.109372																	sp|P24547|IMDH2_MOUSE	Impdh2	4	0.663481	0.0319674	0.156899				sp|P70372|ELAV1_MOUSE	Elavl1	23	-3.91448	9.7632e-09	1.37075e-05
sp|O55126|NIPS2_MOUSE	Gbas	10	0.683596	0.00728775	0.0812064																	sp|Q9CQF3|CPSF5_MOUSE	Nudt21	6	0.662519	0.0248867	0.138777
sp|Q78PY7|SND1_MOUSE	Snd1	44	0.67744	0.0491718	0.188112																	sp|Q9CY58|PAIRB_MOUSE	Serbp1	17	0.655263	0.0574907	0.202298
sp|Q9CPQ1|COX6C_MOUSE	Cox6c	7	0.671305	0.0235164	0.134403																	sp|P62082|RS7_MOUSE	Rps7	26	0.632879	0.0141284	0.108991
sp|Q8CI11|GNL3_MOUSE	Gnl3	4	0.670737	0.00198508	0.0380539																	sp|Q62093|SRSF2_MOUSE	Srsf2	11	0.632372	0.0595354	0.206389
sp|P24547|IMDH2_MOUSE	Impdh2	4	0.663481	0.0319674	0.156899																	sp|Q99LC3|NDUAA_MOUSE	Ndufa10	9	0.631635	0.0159786	0.113076
sp|Q9CQF3|CPSF5_MOUSE	Nudt21	6	0.662519	0.0248867	0.138777																	sp|P99028|QCR6_MOUSE	Uqcrh	5	0.627847	0.014019	0.108744
sp|Q9CY58|PAIRB_MOUSE	Serbp1	17	0.655263	0.0574907	0.202298																	sp|P62960|YBOX1_MOUSE	Ybx1	24	0.625806	0.0288203	0.150826
sp|P62082|RS7_MOUSE	Rps7	26	0.632879	0.0141284	0.108991																	sp|Q06185|ATP5I_MOUSE	Atp5i	4	0.618495	0.022162	0.129246
sp|Q62093|SRSF2_MOUSE	Srsf2	11	0.632372	0.0595354	0.206389																	sp|Q9CQZ5|NDUA6_MOUSE	Ndufa6	5	0.61756	0.0288975	0.150826
sp|Q99LC3|NDUAA_MOUSE	Ndufa10	9	0.631635	0.0159786	0.113076																	sp|P63158|HMGB1_MOUSE	Hmgb1	19	0.612104	0.00240654	0.0434976
sp|P99028|QCR6_MOUSE	Uqcrh	5	0.627847	0.014019	0.108744																	sp|Q8R1F0|L10K_MOUSE	D8Ertd738e	6	0.607391	0.0014801	0.0329414
sp|P62960|YBOX1_MOUSE	Ybx1	24	0.625806	0.0288203	0.150826																	sp|Q9DB20|ATPO_MOUSE	Atp5o	15	0.605641	0.0206948	0.124702
sp|Q06185|ATP5I_MOUSE	Atp5i	4	0.618495	0.022162	0.129246																	sp|Q640R3|HECAM_MOUSE	Hepacam	8	0.597715	0.00441653	0.0613941
sp|Q9CQZ5|NDUA6_MOUSE	Ndufa6	5	0.61756	0.0288975	0.150826																	sp|Q91XI1|DUS3L_MOUSE	Dus3l	8	0.595684	0.135103	0.332406
sp|P63158|HMGB1_MOUSE	Hmgb1	19	0.612104	0.00240654	0.0434976																	sp|Q8BH59|CMC1_MOUSE	Slc25a12	6	0.594272	0.0138754	0.108744
sp|Q8R1F0|L10K_MOUSE	D8Ertd738e	6	0.607391	0.0014801	0.0329414																	sp|Q8K2B3|SDHA_MOUSE	Sdha	21	0.579162	0.00796704	0.0832923
sp|Q9DB20|ATPO_MOUSE	Atp5o	15	0.605641	0.0206948	0.124702																	sp|Q9DB41|GHC2_MOUSE	Slc25a18	16	0.577198	0.0116336	0.100241
sp|Q640R3|HECAM_MOUSE	Hepacam	8	0.597715	0.00441653	0.0613941																	sp|Q8CGK3|LONM_MOUSE	Lonp1	6	0.575335	0.00631613	0.0738987
sp|Q91XI1|DUS3L_MOUSE	Dus3l	8	0.595684	0.135103	0.332406																	sp|Q80U78|PUM1_MOUSE	Pum1	4	0.575134	0.00229393	0.0423773
sp|Q8BH59|CMC1_MOUSE	Slc25a12	6	0.594272	0.0138754	0.108744																	sp|Q9JHW4|SELB_MOUSE	Eefsec	4	0.574584	0.0483203	0.186926
sp|Q8K2B3|SDHA_MOUSE	Sdha	21	0.579162	0.00796704	0.0832923																	sp|P62270|RS18_MOUSE	Rps18	23	0.566078	0.000737655	0.021386
sp|Q9DB41|GHC2_MOUSE	Slc25a18	16	0.577198	0.0116336	0.100241																	sp|P09602|HMGN2_MOUSE	Hmgn2	10	0.562444	0.227102	0.441621
sp|Q8CGK3|LONM_MOUSE	Lonp1	6	0.575335	0.00631613	0.0738987																	sp|Q9R0U0|SRS10_MOUSE	Srsf10	7	0.561017	0.00247288	0.0439484
sp|Q80U78|PUM1_MOUSE	Pum1	4	0.575134	0.00229393	0.0423773																	sp|P80313|TCPH_MOUSE	Cct7	15	0.555231	0.0320238	0.156899
sp|Q9JHW4|SELB_MOUSE	Eefsec	4	0.574584	0.0483203	0.186926																	sp|P19536|COX5B_MOUSE	Cox5b	6	0.553021	0.0260098	0.142648
sp|P62270|RS18_MOUSE	Rps18	23	0.566078	0.000737655	0.021386																	sp|P63001|RAC1_MOUSE	Rac1	6	0.551601	0.0077033	0.0819351
sp|P09602|HMGN2_MOUSE	Hmgn2	10	0.562444	0.227102	0.441621																	sp|Q9CZW5|TOM70_MOUSE	Tomm70	9	0.545099	0.00562492	0.0716345
sp|Q9R0U0|SRS10_MOUSE	Srsf10	7	0.561017	0.00247288	0.0439484																	sp|Q9CR68|UCRI_MOUSE	Uqcrfs1	14	0.541099	0.0218433	0.128318
sp|P80313|TCPH_MOUSE	Cct7	15	0.555231	0.0320238	0.156899																	sp|P52503|NDUS6_MOUSE	Ndufs6	4	0.540422	0.0489452	0.187757
sp|P19536|COX5B_MOUSE	Cox5b	6	0.553021	0.0260098	0.142648																	sp|P12787|COX5A_MOUSE	Cox5a	5	0.540011	0.0124325	0.103828
sp|P63001|RAC1_MOUSE	Rac1	6	0.551601	0.0077033	0.0819351																	sp|Q9D0M3|CY1_MOUSE	Cyc1	10	0.539631	0.0537858	0.19513
sp|Q9CZW5|TOM70_MOUSE	Tomm70	9	0.545099	0.00562492	0.0716345																	sp|Q9D0G0|RT30_MOUSE	Mrps30	5	0.538442	0.0346962	0.16077
sp|Q9CR68|UCRI_MOUSE	Uqcrfs1	14	0.541099	0.0218433	0.128318																	sp|Q9D6R2|IDH3A_MOUSE	Idh3a	11	0.536807	0.0015016	0.0329414
sp|P52503|NDUS6_MOUSE	Ndufs6	4	0.540422	0.0489452	0.187757																	sp|Q8BP92|RCN2_MOUSE	Rcn2	5	0.536216	0.0417741	0.174038
sp|P12787|COX5A_MOUSE	Cox5a	5	0.540011	0.0124325	0.103828																	sp|P53994|RAB2A_MOUSE	Rab2a	4	0.531051	0.0172895	0.115428
sp|Q9D0M3|CY1_MOUSE	Cyc1	10	0.539631	0.0537858	0.19513																	sp|Q8BNV1|TRM2A_MOUSE	Trmt2a	6	0.527882	0.021477	0.127615
sp|Q9D0G0|RT30_MOUSE	Mrps30	5	0.538442	0.0346962	0.16077																	sp|P17095|HMGA1_MOUSE	Hmga1	6	0.522381	0.00756	0.0819351
sp|Q9D6R2|IDH3A_MOUSE	Idh3a	11	0.536807	0.0015016	0.0329414																	sp|Q921G7|ETFD_MOUSE	Etfdh	6	0.519605	0.034048	0.16077
sp|Q8BP92|RCN2_MOUSE	Rcn2	5	0.536216	0.0417741	0.174038																	sp|O55022|PGRC1_MOUSE	Pgrmc1	5	0.518018	0.123993	0.315374
sp|P53994|RAB2A_MOUSE	Rab2a	4	0.531051	0.0172895	0.115428																	sp|Q505F5|LRC47_MOUSE	Lrrc47	7	0.516704	0.0849705	0.253636
sp|Q8BNV1|TRM2A_MOUSE	Trmt2a	6	0.527882	0.021477	0.127615																	sp|P56135|ATPK_MOUSE	Atp5j2	4	0.51518	0.00867359	0.0888885
sp|P17095|HMGA1_MOUSE	Hmga1	6	0.522381	0.00756	0.0819351																	sp|Q9CRB9|MIC19_MOUSE	Chchd3	12	0.515048	0.0337476	0.16077
sp|Q921G7|ETFD_MOUSE	Etfdh	6	0.519605	0.034048	0.16077																	sp|P63325|RS10_MOUSE	Rps10	23	0.51397	0.0199016	0.12273
sp|O55022|PGRC1_MOUSE	Pgrmc1	5	0.518018	0.123993	0.315374																	sp|P47738|ALDH2_MOUSE	Aldh2	4	0.507947	0.0373927	0.165398
sp|Q505F5|LRC47_MOUSE	Lrrc47	7	0.516704	0.0849705	0.253636																	sp|P50544|ACADV_MOUSE	Acadvl	10	0.505483	0.0174292	0.115428
sp|P56135|ATPK_MOUSE	Atp5j2	4	0.51518	0.00867359	0.0888885																	sp|O35129|PHB2_MOUSE	Phb2	20	0.499681	0.00885813	0.0892007
sp|Q9CRB9|MIC19_MOUSE	Chchd3	12	0.515048	0.0337476	0.16077																	sp|Q99JB2|STML2_MOUSE	Stoml2	8	0.499367	0.0189163	0.120174
sp|P63325|RS10_MOUSE	Rps10	23	0.51397	0.0199016	0.12273																	sp|P80317|TCPZ_MOUSE	Cct6a	22	0.497948	0.0130643	0.106641
sp|P47738|ALDH2_MOUSE	Aldh2	4	0.507947	0.0373927	0.165398																	sp|Q80VI1|TRI56_MOUSE	Trim56	4	0.492745	0.0358355	0.1623
sp|P50544|ACADV_MOUSE	Acadvl	10	0.505483	0.0174292	0.115428																	sp|P60867|RS20_MOUSE	Rps20	8	0.49209	0.0410638	0.172615
sp|O35129|PHB2_MOUSE	Phb2	20	0.499681	0.00885813	0.0892007																	sp|P42932|TCPQ_MOUSE	Cct8	25	0.491781	0.0294011	0.151206
sp|Q99JB2|STML2_MOUSE	Stoml2	8	0.499367	0.0189163	0.120174																	sp|Q8CGC6|RBM28_MOUSE	Rbm28	6	0.488365	0.0730884	0.230081
sp|P80317|TCPZ_MOUSE	Cct6a	22	0.497948	0.0130643	0.106641																	sp|Q9DCW4|ETFB_MOUSE	Etfb	6	0.486885	0.00294349	0.0486194
sp|Q80VI1|TRI56_MOUSE	Trim56	4	0.492745	0.0358355	0.1623																	sp|P97450|ATP5J_MOUSE	Atp5j	5	0.481363	0.0178622	0.117189
sp|P60867|RS20_MOUSE	Rps20	8	0.49209	0.0410638	0.172615																	sp|Q91W50|CSDE1_MOUSE	Csde1	18	0.478342	0.0173882	0.115428
sp|P42932|TCPQ_MOUSE	Cct8	25	0.491781	0.0294011	0.151206																	sp|Q9DAS9|GBG12_MOUSE	Gng12	4	0.477682	0.0341723	0.16077
sp|Q8CGC6|RBM28_MOUSE	Rbm28	6	0.488365	0.0730884	0.230081																	sp|P17665|COX7C_MOUSE	Cox7c	4	0.47225	0.00789384	0.0832923
sp|Q9DCW4|ETFB_MOUSE	Etfb	6	0.486885	0.00294349	0.0486194																	sp|Q8BMS1|ECHA_MOUSE	Hadha	50	0.470538	0.00476638	0.0656078
sp|P97450|ATP5J_MOUSE	Atp5j	5	0.481363	0.0178622	0.117189																	sp|A2ASQ1|AGRIN_MOUSE	Agrn	7	0.468295	0.00755964	0.0819351
sp|Q91W50|CSDE1_MOUSE	Csde1	18	0.478342	0.0173882	0.115428																	sp|Q8VDN2|AT1A1_MOUSE	Atp1a1	5	0.46625	0.0353966	0.162263
sp|Q9DAS9|GBG12_MOUSE	Gng12	4	0.477682	0.0341723	0.16077																	sp|Q5SUF2|LC7L3_MOUSE	Luc7l3	12	0.464402	0.0156127	0.113076
sp|P17665|COX7C_MOUSE	Cox7c	4	0.47225	0.00789384	0.0832923																	sp|P26443|DHE3_MOUSE	Glud1	31	0.464302	0.165737	0.38022
sp|Q8BMS1|ECHA_MOUSE	Hadha	50	0.470538	0.00476638	0.0656078																	sp|Q9CQA3|SDHB_MOUSE	Sdhb	10	0.464027	0.0401799	0.170422
sp|A2ASQ1|AGRIN_MOUSE	Agrn	7	0.468295	0.00755964	0.0819351																	sp|Q8BH95|ECHM_MOUSE	Echs1	5	0.463173	0.00985272	0.0928404
sp|Q8VDN2|AT1A1_MOUSE	Atp1a1	5	0.46625	0.0353966	0.162263																	sp|P62900|RL31_MOUSE	Rpl31	12	0.462174	0.00885069	0.0892007
sp|Q5SUF2|LC7L3_MOUSE	Luc7l3	12	0.464402	0.0156127	0.113076																	sp|Q9CYI4|LUC7L_MOUSE	Luc7l	11	0.460779	0.00509094	0.0680732
sp|P26443|DHE3_MOUSE	Glud1	31	0.464302	0.165737	0.38022																	sp|P83882|RL36A_MOUSE	Rpl36a	11	0.452898	0.118197	0.305053
sp|Q9CQA3|SDHB_MOUSE	Sdhb	10	0.464027	0.0401799	0.170422																	sp|Q9Z1P6|NDUA7_MOUSE	Ndufa7	9	0.451788	0.0419108	0.174091
sp|Q8BH95|ECHM_MOUSE	Echs1	5	0.463173	0.00985272	0.0928404																	sp|P51174|ACADL_MOUSE	Acadl	5	0.450244	0.0194708	0.12273
sp|P62900|RL31_MOUSE	Rpl31	12	0.462174	0.00885069	0.0892007																	sp|P62889|RL30_MOUSE	Rpl30	12	0.447528	0.00548939	0.0716345
sp|Q9CYI4|LUC7L_MOUSE	Luc7l	11	0.460779	0.00509094	0.0680732																	sp|Q5SS80|DHR13_MOUSE	Dhrs13	4	0.447437	0.01356	0.108734
sp|P83882|RL36A_MOUSE	Rpl36a	11	0.452898	0.118197	0.305053																	sp|Q9CQQ7|AT5F1_MOUSE	Atp5f1	11	0.44566	0.139963	0.340569
sp|Q9Z1P6|NDUA7_MOUSE	Ndufa7	9	0.451788	0.0419108	0.174091																	sp|P62849|RS24_MOUSE	Rps24	8	0.445039	0.0205337	0.124264
sp|P51174|ACADL_MOUSE	Acadl	5	0.450244	0.0194708	0.12273																	sp|P80316|TCPE_MOUSE	Cct5	16	0.444842	0.0155011	0.113076
sp|P62889|RL30_MOUSE	Rpl30	12	0.447528	0.00548939	0.0716345																	sp|Q8BGT5|ALAT2_MOUSE	Gpt2	5	0.443019	0.116988	0.303673
sp|Q5SS80|DHR13_MOUSE	Dhrs13	4	0.447437	0.01356	0.108734																	sp|P62264|RS14_MOUSE	Rps14	11	0.440188	0.00277241	0.0469602
sp|Q9CQQ7|AT5F1_MOUSE	Atp5f1	11	0.44566	0.139963	0.340569																	sp|Q9WUM5|SUCA_MOUSE	Suclg1	5	0.43917	0.0375383	0.165398
sp|P62849|RS24_MOUSE	Rps24	8	0.445039	0.0205337	0.124264																	sp|P97461|RS5_MOUSE	Rps5	17	0.437762	0.00436233	0.0612471
sp|P80316|TCPE_MOUSE	Cct5	16	0.444842	0.0155011	0.113076																	sp|Q8K209|AGRG1_MOUSE	Adgrg1	4	0.435806	0.0124979	0.103828
sp|Q8BGT5|ALAT2_MOUSE	Gpt2	5	0.443019	0.116988	0.303673																	sp|Q99JR1|SFXN1_MOUSE	Sfxn1	12	0.433735	0.0636334	0.216403
sp|P62264|RS14_MOUSE	Rps14	11	0.440188	0.00277241	0.0469602																	sp|P53395|ODB2_MOUSE	Dbt	5	0.431823	0.0199306	0.12273
sp|Q9WUM5|SUCA_MOUSE	Suclg1	5	0.43917	0.0375383	0.165398																	sp|Q923D5|WBP11_MOUSE	Wbp11	5	0.431257	0.00599839	0.0725963
sp|P97461|RS5_MOUSE	Rps5	17	0.437762	0.00436233	0.0612471																	sp|P43274|H14_MOUSE	Hist1h1e	7	0.422737	0.0316836	0.156899
sp|Q8K209|AGRG1_MOUSE	Adgrg1	4	0.435806	0.0124979	0.103828																	sp|Q8BGD9|IF4B_MOUSE	Eif4b	4	0.422261	0.283431	0.505162
sp|Q99JR1|SFXN1_MOUSE	Sfxn1	12	0.433735	0.0636334	0.216403																	sp|P47915|RL29_MOUSE	Rpl29	6	0.421049	0.608896	0.766031
sp|P53395|ODB2_MOUSE	Dbt	5	0.431823	0.0199306	0.12273																	sp|Q8BFR5|EFTU_MOUSE	Tufm	9	0.420887	0.0221854	0.129246
sp|Q923D5|WBP11_MOUSE	Wbp11	5	0.431257	0.00599839	0.0725963																	sp|Q64525|H2B2B_MOUSE	Hist2h2bb	10	0.419809	0.0767403	0.23732
sp|P43274|H14_MOUSE	Hist1h1e	7	0.422737	0.0316836	0.156899																	sp|P62862|RS30_MOUSE	Fau	6	0.418981	0.23735	0.453386
sp|Q8BGD9|IF4B_MOUSE	Eif4b	4	0.422261	0.283431	0.505162																	sp|P20357|MTAP2_MOUSE	Map2	34	0.418676	0.0996932	0.276399
sp|P47915|RL29_MOUSE	Rpl29	6	0.421049	0.608896	0.766031																	sp|Q9CQ75|NDUA2_MOUSE	Ndufa2	5	0.417654	0.0297044	0.151313
sp|Q8BFR5|EFTU_MOUSE	Tufm	9	0.420887	0.0221854	0.129246																	sp|Q8CGF7|TCRG1_MOUSE	Tcerg1	9	0.416634	0.0504017	0.191089
sp|Q64525|H2B2B_MOUSE	Hist2h2bb	10	0.419809	0.0767403	0.23732																	sp|Q91VD9|NDUS1_MOUSE	Ndufs1	27	0.416584	0.030131	0.152173
sp|P62862|RS30_MOUSE	Fau	6	0.418981	0.23735	0.453386																	sp|Q99LB2|DHRS4_MOUSE	Dhrs4	4	0.408838	0.00766594	0.0819351
sp|P20357|MTAP2_MOUSE	Map2	34	0.418676	0.0996932	0.276399																	sp|Q6ZWV7|RL35_MOUSE	Rpl35	12	0.404675	0.0998454	0.276399
sp|Q9CQ75|NDUA2_MOUSE	Ndufa2	5	0.417654	0.0297044	0.151313																	sp|Q8CCF0|PRP31_MOUSE	Prpf31	10	0.404325	0.0120453	0.102494
sp|Q8CGF7|TCRG1_MOUSE	Tcerg1	9	0.416634	0.0504017	0.191089																	sp|Q7TMF3|NDUAC_MOUSE	Ndufa12	4	0.403057	0.136858	0.334779
sp|Q91VD9|NDUS1_MOUSE	Ndufs1	27	0.416584	0.030131	0.152173																	sp|P62852|RS25_MOUSE	Rps25	16	0.401133	0.0422223	0.174868
sp|Q99LB2|DHRS4_MOUSE	Dhrs4	4	0.408838	0.00766594	0.0819351																	sp|Q60749|KHDR1_MOUSE	Khdrbs1	13	0.400229	0.0115229	0.100241
sp|Q6ZWV7|RL35_MOUSE	Rpl35	12	0.404675	0.0998454	0.276399																	sp|P43006|EAA2_MOUSE	Slc1a2	7	0.398764	0.0139463	0.108744
sp|Q8CCF0|PRP31_MOUSE	Prpf31	10	0.404325	0.0120453	0.102494																	sp|Q9CZ13|QCR1_MOUSE	Uqcrc1	19	0.396791	0.0171493	0.115428
sp|Q7TMF3|NDUAC_MOUSE	Ndufa12	4	0.403057	0.136858	0.334779																	sp|Q99N93|RM16_MOUSE	Mrpl16	4	0.396785	0.0698406	0.226846
sp|P62852|RS25_MOUSE	Rps25	16	0.401133	0.0422223	0.174868																	sp|O35737|HNRH1_MOUSE	Hnrnph1	22	0.39667	0.00502826	0.0680732
sp|Q60749|KHDR1_MOUSE	Khdrbs1	13	0.400229	0.0115229	0.100241																	sp|Q9Z2I0|LETM1_MOUSE	Letm1	6	0.395417	0.0283666	0.149724
sp|P43006|EAA2_MOUSE	Slc1a2	7	0.398764	0.0139463	0.108744																	sp|Q9CXZ1|NDUS4_MOUSE	Ndufs4	4	0.394691	0.095861	0.272447
sp|Q9CZ13|QCR1_MOUSE	Uqcrc1	19	0.396791	0.0171493	0.115428																	sp|Q9DCX2|ATP5H_MOUSE	Atp5h	12	0.392398	0.0501878	0.190958
sp|Q99N93|RM16_MOUSE	Mrpl16	4	0.396785	0.0698406	0.226846																	sp|Q8JZN5|ACAD9_MOUSE	Acad9	5	0.392088	0.0201034	0.122836
sp|O35737|HNRH1_MOUSE	Hnrnph1	22	0.39667	0.00502826	0.0680732																	sp|P26043|RADI_MOUSE	Rdx	15	0.391143	0.155796	0.363955
sp|Q9Z2I0|LETM1_MOUSE	Letm1	6	0.395417	0.0283666	0.149724																	sp|P62918|RL8_MOUSE	Rpl8	19	0.385673	0.0185594	0.119529
sp|Q9CXZ1|NDUS4_MOUSE	Ndufs4	4	0.394691	0.095861	0.272447																	sp|P97351|RS3A_MOUSE	Rps3a	38	0.385588	0.00608103	0.0725963
sp|Q9DCX2|ATP5H_MOUSE	Atp5h	12	0.392398	0.0501878	0.190958																	sp|Q9Z110|P5CS_MOUSE	Aldh18a1	7	0.382629	0.0127094	0.10435
sp|Q8JZN5|ACAD9_MOUSE	Acad9	5	0.392088	0.0201034	0.122836																	sp|Q9CQC7|NDUB4_MOUSE	Ndufb4	5	0.378135	0.011299	0.0991483
sp|P26043|RADI_MOUSE	Rdx	15	0.391143	0.155796	0.363955																	sp|Q8BK67|RCC2_MOUSE	Rcc2	11	0.373703	0.197059	0.408673
sp|P62918|RL8_MOUSE	Rpl8	19	0.385673	0.0185594	0.119529																	sp|A2AAY5|SPD2B_MOUSE	Sh3pxd2b	6	0.372577	0.229838	0.443869
sp|P97351|RS3A_MOUSE	Rps3a	38	0.385588	0.00608103	0.0725963																	sp|P20060|HEXB_MOUSE	Hexb	10	0.370073	0.0271716	0.14669
sp|Q9Z110|P5CS_MOUSE	Aldh18a1	7	0.382629	0.0127094	0.10435																	sp|P08752|GNAI2_MOUSE	Gnai2	17	0.36987	0.169426	0.383334
sp|Q9CQC7|NDUB4_MOUSE	Ndufb4	5	0.378135	0.011299	0.0991483																	sp|Q9D6J6|NDUV2_MOUSE	Ndufv2	4	0.367812	0.0908486	0.264041
sp|Q8BK67|RCC2_MOUSE	Rcc2	11	0.373703	0.197059	0.408673																	sp|P68433|H31_MOUSE	Hist1h3a	8	0.36587	0.0936688	0.267552
sp|A2AAY5|SPD2B_MOUSE	Sh3pxd2b	6	0.372577	0.229838	0.443869																	sp|P62301|RS13_MOUSE	Rps13	10	0.365617	0.0299334	0.15172
sp|P20060|HEXB_MOUSE	Hexb	10	0.370073	0.0271716	0.14669																	sp|P80315|TCPD_MOUSE	Cct4	19	0.365083	0.035596	0.162263
sp|P08752|GNAI2_MOUSE	Gnai2	17	0.36987	0.169426	0.383334																	sp|P10126|EF1A1_MOUSE	Eef1a1	37	0.363555	0.115644	0.301791
sp|Q9D6J6|NDUV2_MOUSE	Ndufv2	4	0.367812	0.0908486	0.264041																	sp|Q80VD1|FA98B_MOUSE	Fam98b	13	0.362733	0.0277364	0.148068
sp|P68433|H31_MOUSE	Hist1h3a	8	0.36587	0.0936688	0.267552																	sp|Q3UVK0|ERMP1_MOUSE	Ermp1	8	0.362498	0.116065	0.302328
sp|P62301|RS13_MOUSE	Rps13	10	0.365617	0.0299334	0.15172																	sp|P62855|RS26_MOUSE	Rps26	5	0.359325	0.0152546	0.113076
sp|P80315|TCPD_MOUSE	Cct4	19	0.365083	0.035596	0.162263																	sp|P39749|FEN1_MOUSE	Fen1	10	0.354451	0.0327046	0.157791
sp|P10126|EF1A1_MOUSE	Eef1a1	37	0.363555	0.115644	0.301791																	sp|P70333|HNRH2_MOUSE	Hnrnph2	8	0.349982	0.142225	0.344878
sp|Q80VD1|FA98B_MOUSE	Fam98b	13	0.362733	0.0277364	0.148068																	sp|Q8BMA6|SRP68_MOUSE	Srp68	7	0.349913	0.556301	0.726554
sp|Q3UVK0|ERMP1_MOUSE	Ermp1	8	0.362498	0.116065	0.302328																	sp|Q6PIE5|AT1A2_MOUSE	Atp1a2	49	0.348649	0.0292376	0.151206
sp|P62855|RS26_MOUSE	Rps26	5	0.359325	0.0152546	0.113076																	sp|P35486|ODPA_MOUSE	Pdha1	11	0.348519	0.0345885	0.16077
sp|P39749|FEN1_MOUSE	Fen1	10	0.354451	0.0327046	0.157791																	sp|P62242|RS8_MOUSE	Rps8	17	0.346503	0.0267551	0.145597
sp|P70333|HNRH2_MOUSE	Hnrnph2	8	0.349982	0.142225	0.344878																	sp|Q99KI0|ACON_MOUSE	Aco2	17	0.346265	0.0106517	0.0964839
sp|Q8BMA6|SRP68_MOUSE	Srp68	7	0.349913	0.556301	0.726554																	sp|Q9D4J7|PHF6_MOUSE	Phf6	10	0.342522	0.0198597	0.12273
sp|Q6PIE5|AT1A2_MOUSE	Atp1a2	49	0.348649	0.0292376	0.151206																	sp|P62843|RS15_MOUSE	Rps15	8	0.339455	0.046709	0.184581
sp|P35486|ODPA_MOUSE	Pdha1	11	0.348519	0.0345885	0.16077																	sp|P29758|OAT_MOUSE	Oat	4	0.338471	0.0136305	0.108734
sp|P62242|RS8_MOUSE	Rps8	17	0.346503	0.0267551	0.145597																	sp|P14231|AT1B2_MOUSE	Atp1b2	6	0.337023	0.925417	0.959591
sp|Q99KI0|ACON_MOUSE	Aco2	17	0.346265	0.0106517	0.0964839																	sp|Q91W92|BORG5_MOUSE	Cdc42ep1	5	0.335939	0.357119	0.566547
sp|Q9D4J7|PHF6_MOUSE	Phf6	10	0.342522	0.0198597	0.12273																	sp|Q9DC69|NDUA9_MOUSE	Ndufa9	13	0.335561	0.0182625	0.118159
sp|P62843|RS15_MOUSE	Rps15	8	0.339455	0.046709	0.184581																	sp|P62281|RS11_MOUSE	Rps11	23	0.330821	0.00933651	0.0908348
sp|P29758|OAT_MOUSE	Oat	4	0.338471	0.0136305	0.108734																	sp|O35326|SRSF5_MOUSE	Srsf5	11	0.327866	0.025998	0.142648
sp|P14231|AT1B2_MOUSE	Atp1b2	6	0.337023	0.925417	0.959591																	sp|Q8JZU2|TXTP_MOUSE	Slc25a1	10	0.326545	0.0329137	0.158256
sp|Q91W92|BORG5_MOUSE	Cdc42ep1	5	0.335939	0.357119	0.566547																	sp|Q9D1I6|RM14_MOUSE	Mrpl14	4	0.325329	0.0326361	0.157791
sp|Q9DC69|NDUA9_MOUSE	Ndufa9	13	0.335561	0.0182625	0.118159																	sp|P62751|RL23A_MOUSE	Rpl23a	18	0.322234	0.0159238	0.113076
sp|P62281|RS11_MOUSE	Rps11	23	0.330821	0.00933651	0.0908348																	sp|P16045|LEG1_MOUSE	Lgals1	5	0.321827	0.283137	0.505162
sp|O35326|SRSF5_MOUSE	Srsf5	11	0.327866	0.025998	0.142648																	sp|Q8K3J1|NDUS8_MOUSE	Ndufs8	5	0.321206	0.123221	0.31398
sp|Q8JZU2|TXTP_MOUSE	Slc25a1	10	0.326545	0.0329137	0.158256																	sp|Q61136|PRP4B_MOUSE	Prpf4b	11	0.319205	0.206531	0.417139
sp|Q9D1I6|RM14_MOUSE	Mrpl14	4	0.325329	0.0326361	0.157791																	sp|P28352|APEX1_MOUSE	Apex1	15	0.318001	0.0428712	0.175603
sp|P62751|RL23A_MOUSE	Rpl23a	18	0.322234	0.0159238	0.113076																	sp|Q6NV83|SR140_MOUSE	U2surp	14	0.317505	0.16793	0.382671
sp|P16045|LEG1_MOUSE	Lgals1	5	0.321827	0.283137	0.505162																	sp|P56959|FUS_MOUSE	Fus	10	0.316128	0.241656	0.457875
sp|Q8K3J1|NDUS8_MOUSE	Ndufs8	5	0.321206	0.123221	0.31398																	sp|P43276|H15_MOUSE	Hist1h1b	14	0.314513	0.0555032	0.198389
sp|Q61136|PRP4B_MOUSE	Prpf4b	11	0.319205	0.206531	0.417139																	sp|P47911|RL6_MOUSE	Rpl6	23	0.314502	0.0215418	0.127615
sp|P28352|APEX1_MOUSE	Apex1	15	0.318001	0.0428712	0.175603																	sp|Q9ET30|TM9S3_MOUSE	Tm9sf3	4	0.314201	0.544175	0.718065
sp|Q6NV83|SR140_MOUSE	U2surp	14	0.317505	0.16793	0.382671																	sp|Q9CS84|NRX1A_MOUSE	Nrxn1	7	0.314182	0.0918651	0.265388
sp|P56959|FUS_MOUSE	Fus	10	0.316128	0.241656	0.457875																	sp|P46471|PRS7_MOUSE	Psmc2	9	0.3073	0.170644	0.383334
sp|P43276|H15_MOUSE	Hist1h1b	14	0.314513	0.0555032	0.198389																	sp|Q9CQ62|DECR_MOUSE	Decr1	8	0.306902	0.350149	0.562885
sp|P47911|RL6_MOUSE	Rpl6	23	0.314502	0.0215418	0.127615																	sp|Q9Z329|ITPR2_MOUSE	Itpr2	11	0.30615	0.0744467	0.232274
sp|Q9ET30|TM9S3_MOUSE	Tm9sf3	4	0.314201	0.544175	0.718065																	sp|Q7TNV0|DEK_MOUSE	Dek	9	0.305885	0.0162628	0.113076
sp|Q9CS84|NRX1A_MOUSE	Nrxn1	7	0.314182	0.0918651	0.265388																	sp|Q9D0B0|SRSF9_MOUSE	Srsf9	13	0.305174	0.0339592	0.16077
sp|P46471|PRS7_MOUSE	Psmc2	9	0.3073	0.170644	0.383334																	sp|Q62186|SSRD_MOUSE	Ssr4	7	0.304615	0.0591279	0.205484
sp|Q9CQ62|DECR_MOUSE	Decr1	8	0.306902	0.350149	0.562885																	sp|Q6ZQI3|MLEC_MOUSE	Mlec	10	0.303655	0.0448993	0.180627
sp|Q9Z329|ITPR2_MOUSE	Itpr2	11	0.30615	0.0744467	0.232274																	sp|O54734|OST48_MOUSE	Ddost	12	0.301567	0.0234373	0.134403
sp|Q7TNV0|DEK_MOUSE	Dek	9	0.305885	0.0162628	0.113076																	sp|Q9D710|TMX2_MOUSE	Tmx2	7	0.300752	0.0216784	0.127885
sp|Q9D0B0|SRSF9_MOUSE	Srsf9	13	0.305174	0.0339592	0.16077																	sp|Q99L45|IF2B_MOUSE	Eif2s2	13	0.300063	0.100205	0.276399
sp|Q62186|SSRD_MOUSE	Ssr4	7	0.304615	0.0591279	0.205484																	sp|O35841|API5_MOUSE	Api5	8	0.298644	0.0754733	0.234954
sp|Q6ZQI3|MLEC_MOUSE	Mlec	10	0.303655	0.0448993	0.180627																	sp|Q80Y17|L2GL1_MOUSE	Llgl1	17	0.295819	0.173372	0.383819
sp|O54734|OST48_MOUSE	Ddost	12	0.301567	0.0234373	0.134403																	sp|P25206|MCM3_MOUSE	Mcm3	19	0.295517	0.036834	0.164975
sp|Q9D710|TMX2_MOUSE	Tmx2	7	0.300752	0.0216784	0.127885																	sp|P62806|H4_MOUSE	Hist1h4a	15	0.294163	0.0579835	0.203522
sp|Q99L45|IF2B_MOUSE	Eif2s2	13	0.300063	0.100205	0.276399																	sp|Q8R081|HNRPL_MOUSE	Hnrnpl	22	0.292396	0.0659738	0.218975
sp|O35841|API5_MOUSE	Api5	8	0.298644	0.0754733	0.234954																	sp|Q8BX10|PGAM5_MOUSE	Pgam5	9	0.292342	0.0352467	0.162263
sp|Q80Y17|L2GL1_MOUSE	Llgl1	17	0.295819	0.173372	0.383819																	sp|Q9Z2I8|SUCB2_MOUSE	Suclg2	4	0.292155	0.0758485	0.2356
sp|P25206|MCM3_MOUSE	Mcm3	19	0.295517	0.036834	0.164975																	sp|Q60931|VDAC3_MOUSE	Vdac3	18	0.291997	0.0474481	0.185563
sp|P62806|H4_MOUSE	Hist1h4a	15	0.294163	0.0579835	0.203522																	sp|P14148|RL7_MOUSE	Rpl7	24	0.290001	0.0644167	0.216403
sp|Q8R081|HNRPL_MOUSE	Hnrnpl	22	0.292396	0.0659738	0.218975																	sp|Q9CZX9|EMC4_MOUSE	Emc4	6	0.289213	0.350593	0.562885
sp|Q8BX10|PGAM5_MOUSE	Pgam5	9	0.292342	0.0352467	0.162263																	sp|Q9Z1X4|ILF3_MOUSE	Ilf3	53	0.286682	0.0812941	0.247994
sp|Q9Z2I8|SUCB2_MOUSE	Suclg2	4	0.292155	0.0758485	0.2356																	sp|Q8BSY0|ASPH_MOUSE	Asph	10	0.285982	0.0823575	0.250281
sp|Q60931|VDAC3_MOUSE	Vdac3	18	0.291997	0.0474481	0.185563																	sp|Q9D2G2|ODO2_MOUSE	Dlst	9	0.284391	0.866628	0.932747
sp|P14148|RL7_MOUSE	Rpl7	24	0.290001	0.0644167	0.216403																	sp|P15864|H12_MOUSE	Hist1h1c	21	0.283712	0.0868355	0.255799
sp|Q9CZX9|EMC4_MOUSE	Emc4	6	0.289213	0.350593	0.562885																	sp|Q9D855|QCR7_MOUSE	Uqcrb	9	0.280938	0.101168	0.277965
sp|Q9Z1X4|ILF3_MOUSE	Ilf3	53	0.286682	0.0812941	0.247994																	sp|Q99020|ROAA_MOUSE	Hnrnpab	24	0.280917	0.289955	0.510944
sp|Q8BSY0|ASPH_MOUSE	Asph	10	0.285982	0.0823575	0.250281																	sp|P70404|IDHG1_MOUSE	Idh3g	8	0.280326	0.868969	0.932747
sp|Q9D2G2|ODO2_MOUSE	Dlst	9	0.284391	0.866628	0.932747																	sp|Q64521|GPDM_MOUSE	Gpd2	20	0.279395	0.16186	0.37377
sp|P15864|H12_MOUSE	Hist1h1c	21	0.283712	0.0868355	0.255799																	sp|Q9CZX8|RS19_MOUSE	Rps19	19	0.27776	0.0377228	0.165398
sp|Q9D855|QCR7_MOUSE	Uqcrb	9	0.280938	0.101168	0.277965																	sp|P61620|S61A1_MOUSE	Sec61a1	9	0.27637	0.262739	0.480945
sp|Q99020|ROAA_MOUSE	Hnrnpab	24	0.280917	0.289955	0.510944																	sp|Q61335|BAP31_MOUSE	Bcap31	11	0.275846	0.0499544	0.190587
sp|P70404|IDHG1_MOUSE	Idh3g	8	0.280326	0.868969	0.932747																	sp|Q60597|ODO1_MOUSE	Ogdh	18	0.274633	0.027452	0.147109
sp|Q64521|GPDM_MOUSE	Gpd2	20	0.279395	0.16186	0.37377																	sp|Q07417|ACADS_MOUSE	Acads	5	0.27443	0.269363	0.487982
sp|Q9CZX8|RS19_MOUSE	Rps19	19	0.27776	0.0377228	0.165398																	sp|P48678|LMNA_MOUSE	Lmna	9	0.273545	0.105207	0.284608
sp|P61620|S61A1_MOUSE	Sec61a1	9	0.27637	0.262739	0.480945																	sp|P62830|RL23_MOUSE	Rpl23	14	0.27181	0.367745	0.576925
sp|Q61335|BAP31_MOUSE	Bcap31	11	0.275846	0.0499544	0.190587																	sp|Q91WD5|NDUS2_MOUSE	Ndufs2	11	0.271442	0.0710948	0.228938
sp|Q60597|ODO1_MOUSE	Ogdh	18	0.274633	0.027452	0.147109																	sp|Q8VHE0|SEC63_MOUSE	Sec63	14	0.271205	0.561922	0.730498
sp|Q07417|ACADS_MOUSE	Acads	5	0.27443	0.269363	0.487982																	sp|P43275|H11_MOUSE	Hist1h1a	7	0.270914	0.480317	0.672116
sp|P48678|LMNA_MOUSE	Lmna	9	0.273545	0.105207	0.284608																	sp|P97473|TRBP2_MOUSE	Tarbp2	5	0.270283	0.48063	0.672116
sp|P62830|RL23_MOUSE	Rpl23	14	0.27181	0.367745	0.576925																	sp|P62880|GBB2_MOUSE	Gnb2	5	0.270254	0.431259	0.628751
sp|Q91WD5|NDUS2_MOUSE	Ndufs2	11	0.271442	0.0710948	0.228938																	sp|P61255|RL26_MOUSE	Rpl26	23	0.268793	0.0401807	0.170422
sp|Q8VHE0|SEC63_MOUSE	Sec63	14	0.271205	0.561922	0.730498																	sp|Q9CR62|M2OM_MOUSE	Slc25a11	10	0.268007	0.0211999	0.126658
sp|P43275|H11_MOUSE	Hist1h1a	7	0.270914	0.480317	0.672116																	sp|Q91YJ3|THYN1_MOUSE	Thyn1	6	0.267269	0.530303	0.70768
sp|P97473|TRBP2_MOUSE	Tarbp2	5	0.270283	0.48063	0.672116																	sp|Q9Z2I9|SUCB1_MOUSE	Sucla2	12	0.266612	0.060805	0.210272
sp|P62880|GBB2_MOUSE	Gnb2	5	0.270254	0.431259	0.628751																	sp|P80318|TCPG_MOUSE	Cct3	28	0.265518	0.043261	0.176565
sp|P61255|RL26_MOUSE	Rpl26	23	0.268793	0.0401807	0.170422																	sp|Q9D051|ODPB_MOUSE	Pdhb	12	0.264449	0.0480017	0.186688
sp|Q9CR62|M2OM_MOUSE	Slc25a11	10	0.268007	0.0211999	0.126658																	sp|Q9Z2X1|HNRPF_MOUSE	Hnrnpf	14	0.264431	0.0342706	0.16077
sp|Q91YJ3|THYN1_MOUSE	Thyn1	6	0.267269	0.530303	0.70768																	sp|Q62376|RU17_MOUSE	Snrnp70	19	0.264075	0.0404349	0.170482
sp|Q9Z2I9|SUCB1_MOUSE	Sucla2	12	0.266612	0.060805	0.210272																	sp|Q9CQ69|QCR8_MOUSE	Uqcrq	5	0.262398	0.0272693	0.14669
sp|P80318|TCPG_MOUSE	Cct3	28	0.265518	0.043261	0.176565																	sp|P47955|RLA1_MOUSE	Rplp1	4	0.261963	0.423748	0.622878
sp|Q9D051|ODPB_MOUSE	Pdhb	12	0.264449	0.0480017	0.186688																	sp|Q9QY76|VAPB_MOUSE	Vapb	7	0.258095	0.191079	0.402816
sp|Q9Z2X1|HNRPF_MOUSE	Hnrnpf	14	0.264431	0.0342706	0.16077																	sp|Q9D8W5|PSD12_MOUSE	Psmd12	5	0.257164	0.61725	0.771699
sp|Q62376|RU17_MOUSE	Snrnp70	19	0.264075	0.0404349	0.170482																	sp|Q8CFI7|RPB2_MOUSE	Polr2b	5	0.256668	0.0727952	0.230047
sp|Q9CQ69|QCR8_MOUSE	Uqcrq	5	0.262398	0.0272693	0.14669																	sp|Q9CXY6|ILF2_MOUSE	Ilf2	20	0.255934	0.107139	0.288166
sp|P47955|RLA1_MOUSE	Rplp1	4	0.261963	0.423748	0.622878																	sp|P70670|NACAM_MOUSE	Naca	6	0.255917	0.0357616	0.1623
sp|Q9QY76|VAPB_MOUSE	Vapb	7	0.258095	0.191079	0.402816																	sp|Q07235|GDN_MOUSE	Serpine2	17	0.255891	0.0656597	0.218738
sp|Q9D8W5|PSD12_MOUSE	Psmd12	5	0.257164	0.61725	0.771699																	sp|Q61164|CTCF_MOUSE	Ctcf	11	0.254317	0.160367	0.371542
sp|Q8CFI7|RPB2_MOUSE	Polr2b	5	0.256668	0.0727952	0.230047																	sp|Q9QYI4|DJB12_MOUSE	Dnajb12	5	0.254242	0.325222	0.542816
sp|Q9CXY6|ILF2_MOUSE	Ilf2	20	0.255934	0.107139	0.288166																	sp|Q62425|NDUA4_MOUSE	Ndufa4	6	0.252474	0.117013	0.303673
sp|P70670|NACAM_MOUSE	Naca	6	0.255917	0.0357616	0.1623																	sp|Q8BU14|SEC62_MOUSE	Sec62	6	0.251862	0.263935	0.482051
sp|Q07235|GDN_MOUSE	Serpine2	17	0.255891	0.0656597	0.218738																	sp|Q99JF8|PSIP1_MOUSE	Psip1	17	0.250841	0.152854	0.359477
sp|Q61164|CTCF_MOUSE	Ctcf	11	0.254317	0.160367	0.371542																	sp|P43406|ITAV_MOUSE	Itgav	7	0.249548	0.0297454	0.151313
sp|Q9QYI4|DJB12_MOUSE	Dnajb12	5	0.254242	0.325222	0.542816																	sp|Q9JM63|KCJ10_MOUSE	Kcnj10	5	0.249449	0.0542752	0.195893
sp|Q62425|NDUA4_MOUSE	Ndufa4	6	0.252474	0.117013	0.303673																	sp|Q8R404|MIC13_MOUSE	Mic13	5	0.249276	0.133912	0.33169
sp|Q8BU14|SEC62_MOUSE	Sec62	6	0.251862	0.263935	0.482051																	sp|O88455|DHCR7_MOUSE	Dhcr7	5	0.248769	0.0296782	0.151313
sp|Q99JF8|PSIP1_MOUSE	Psip1	17	0.250841	0.152854	0.359477																	sp|Q6ZWN5|RS9_MOUSE	Rps9	25	0.245275	0.036896	0.164975
sp|P43406|ITAV_MOUSE	Itgav	7	0.249548	0.0297454	0.151313																	sp|Q9D6U8|F162A_MOUSE	Fam162a	4	0.244457	0.0865419	0.255799
sp|Q9JM63|KCJ10_MOUSE	Kcnj10	5	0.249449	0.0542752	0.195893																	sp|P62245|RS15A_MOUSE	Rps15a	15	0.244094	0.041415	0.173572
sp|Q8R404|MIC13_MOUSE	Mic13	5	0.249276	0.133912	0.33169																	sp|O54781|SRPK2_MOUSE	Srpk2	8	0.243366	0.0715213	0.228969
sp|O88455|DHCR7_MOUSE	Dhcr7	5	0.248769	0.0296782	0.151313																	sp|Q6GQT9|NOMO1_MOUSE	Nomo1	25	0.243185	0.0561666	0.19964
sp|Q6ZWN5|RS9_MOUSE	Rps9	25	0.245275	0.036896	0.164975																	sp|Q791V5|MTCH2_MOUSE	Mtch2	7	0.240534	0.917707	0.954416
sp|Q9D6U8|F162A_MOUSE	Fam162a	4	0.244457	0.0865419	0.255799																	sp|P30999|CTND1_MOUSE	Ctnnd1	9	0.239407	0.80956	0.897564
sp|P62245|RS15A_MOUSE	Rps15a	15	0.244094	0.041415	0.173572																	sp|F8VPU2|FARP1_MOUSE	Farp1	8	0.238889	0.348523	0.562885
sp|O54781|SRPK2_MOUSE	Srpk2	8	0.243366	0.0715213	0.228969																	sp|P16330|CN37_MOUSE	Cnp	5	0.238576	0.0279739	0.148209
sp|Q6GQT9|NOMO1_MOUSE	Nomo1	25	0.243185	0.0561666	0.19964																	sp|Q9CPT5|NOP16_MOUSE	Nop16	8	0.238535	0.0378154	0.165398
sp|Q791V5|MTCH2_MOUSE	Mtch2	7	0.240534	0.917707	0.954416																	sp|P63089|PTN_MOUSE	Ptn	11	0.237706	0.353356	0.564253
sp|P30999|CTND1_MOUSE	Ctnnd1	9	0.239407	0.80956	0.897564																	sp|Q91WQ3|SYYC_MOUSE	Yars	17	0.237029	0.063115	0.21613
sp|F8VPU2|FARP1_MOUSE	Farp1	8	0.238889	0.348523	0.562885																	sp|Q99NH0|ANR17_MOUSE	Ankrd17	4	0.234522	0.108634	0.28847
sp|P16330|CN37_MOUSE	Cnp	5	0.238576	0.0279739	0.148209																	sp|Q61191|HCFC1_MOUSE	Hcfc1	6	0.233238	0.774801	0.878692
sp|Q9CPT5|NOP16_MOUSE	Nop16	8	0.238535	0.0378154	0.165398																	sp|Q925N0|SFXN5_MOUSE	Sfxn5	14	0.231704	0.0587461	0.205173
sp|P63089|PTN_MOUSE	Ptn	11	0.237706	0.353356	0.564253																	sp|Q9D7S7|RL22L_MOUSE	Rpl22l1	5	0.231258	0.0556732	0.198389
sp|Q91WQ3|SYYC_MOUSE	Yars	17	0.237029	0.063115	0.21613																	sp|Q6ZWV3|RL10_MOUSE	Rpl10	21	0.23077	0.134789	0.332406
sp|Q99NH0|ANR17_MOUSE	Ankrd17	4	0.234522	0.108634	0.28847																	sp|P10922|H10_MOUSE	H1f0	9	0.230252	0.400024	0.607172
sp|Q61191|HCFC1_MOUSE	Hcfc1	6	0.233238	0.774801	0.878692																	sp|Q60930|VDAC2_MOUSE	Vdac2	20	0.22965	0.0415903	0.173788
sp|Q925N0|SFXN5_MOUSE	Sfxn5	14	0.231704	0.0587461	0.205173																	sp|P61514|RL37A_MOUSE	Rpl37a	7	0.228927	0.180031	0.3931
sp|Q9D7S7|RL22L_MOUSE	Rpl22l1	5	0.231258	0.0556732	0.198389																	sp|Q9CW03|SMC3_MOUSE	Smc3	25	0.228926	0.341047	0.558143
sp|Q6ZWV3|RL10_MOUSE	Rpl10	21	0.23077	0.134789	0.332406																	sp|Q9WV02|RBMX_MOUSE	Rbmx	9	0.227358	0.264029	0.482051
sp|P10922|H10_MOUSE	H1f0	9	0.230252	0.400024	0.607172																	sp|P46978|STT3A_MOUSE	Stt3a	10	0.226505	0.0644278	0.216403
sp|Q60930|VDAC2_MOUSE	Vdac2	20	0.22965	0.0415903	0.173788																	sp|P55066|NCAN_MOUSE	Ncan	11	0.222319	0.044883	0.180627
sp|P61514|RL37A_MOUSE	Rpl37a	7	0.228927	0.180031	0.3931																	sp|Q3UMU9|HDGR2_MOUSE	Hdgfrp2	7	0.219802	0.0653114	0.218327
sp|Q9CW03|SMC3_MOUSE	Smc3	25	0.228926	0.341047	0.558143																	sp|P08775|RPB1_MOUSE	Polr2a	10	0.215434	0.0772131	0.238257
sp|Q9WV02|RBMX_MOUSE	Rbmx	9	0.227358	0.264029	0.482051																	sp|P47758|SRPRB_MOUSE	Srprb	8	0.215416	0.0547252	0.197011
sp|P46978|STT3A_MOUSE	Stt3a	10	0.226505	0.0644278	0.216403																	sp|Q99LF4|RTCB_MOUSE	Rtcb	20	0.215318	0.416852	0.618668
sp|P55066|NCAN_MOUSE	Ncan	11	0.222319	0.044883	0.180627																	sp|Q9JIF7|COPB_MOUSE	Copb1	4	0.215211	0.945744	0.968508
sp|Q3UMU9|HDGR2_MOUSE	Hdgfrp2	7	0.219802	0.0653114	0.218327																	sp|Q9D379|HYEP_MOUSE	Ephx1	4	0.214908	0.33234	0.550891
sp|P08775|RPB1_MOUSE	Polr2a	10	0.215434	0.0772131	0.238257																	sp|P99027|RLA2_MOUSE	Rplp2	6	0.214192	0.169695	0.383334
sp|P47758|SRPRB_MOUSE	Srprb	8	0.215416	0.0547252	0.197011																	sp|Q8R2Y8|PTH2_MOUSE	Ptrh2	4	0.213805	0.945429	0.968508
sp|Q99LF4|RTCB_MOUSE	Rtcb	20	0.215318	0.416852	0.618668																	sp|Q8BFZ9|ERLN2_MOUSE	Erlin2	13	0.211262	0.122875	0.313667
sp|Q9JIF7|COPB_MOUSE	Copb1	4	0.215211	0.945744	0.968508																	sp|Q9D517|PLCC_MOUSE	Agpat3	7	0.210937	0.168076	0.382671
sp|Q9D379|HYEP_MOUSE	Ephx1	4	0.214908	0.33234	0.550891																	sp|P56564|EAA1_MOUSE	Slc1a3	8	0.208979	0.773621	0.878063
sp|P99027|RLA2_MOUSE	Rplp2	6	0.214192	0.169695	0.383334																	sp|Q1HFZ0|NSUN2_MOUSE	Nsun2	21	0.208718	0.0556016	0.198389
sp|Q8R2Y8|PTH2_MOUSE	Ptrh2	4	0.213805	0.945429	0.968508																	sp|Q3U9G9|LBR_MOUSE	Lbr	13	0.208229	0.294094	0.514848
sp|Q8BFZ9|ERLN2_MOUSE	Erlin2	13	0.211262	0.122875	0.313667																	sp|Q922Q1|MARC2_MOUSE	Marc2	6	0.207859	0.0553051	0.198389
sp|Q9D517|PLCC_MOUSE	Agpat3	7	0.210937	0.168076	0.382671																	sp|O70133|DHX9_MOUSE	Dhx9	82	0.206379	0.0908137	0.264041
sp|P56564|EAA1_MOUSE	Slc1a3	8	0.208979	0.773621	0.878063																	sp|P45952|ACADM_MOUSE	Acadm	4	0.205497	0.17506	0.384639
sp|Q1HFZ0|NSUN2_MOUSE	Nsun2	21	0.208718	0.0556016	0.198389																	sp|Q9DCT2|NDUS3_MOUSE	Ndufs3	6	0.205015	0.0701221	0.226846
sp|Q3U9G9|LBR_MOUSE	Lbr	13	0.208229	0.294094	0.514848																	sp|Q9D0F3|LMAN1_MOUSE	Lman1	11	0.204851	0.0650848	0.218088
sp|Q922Q1|MARC2_MOUSE	Marc2	6	0.207859	0.0553051	0.198389																	sp|Q9DBG7|SRPRA_MOUSE	Srpra	4	0.201723	0.841208	0.91911
sp|O70133|DHX9_MOUSE	Dhx9	82	0.206379	0.0908137	0.264041																	sp|O70503|DHB12_MOUSE	Hsd17b12	21	0.200274	0.391845	0.598773
sp|P45952|ACADM_MOUSE	Acadm	4	0.205497	0.17506	0.384639																	sp|Q91VE6|MK67I_MOUSE	Nifk	6	0.200149	0.63653	0.784342
sp|Q9DCT2|NDUS3_MOUSE	Ndufs3	6	0.205015	0.0701221	0.226846																	sp|P99024|TBB5_MOUSE	Tubb5	5	0.199506	0.17402	0.384156
sp|Q9D0F3|LMAN1_MOUSE	Lman1	11	0.204851	0.0650848	0.218088																	sp|Q9DC70|NDUS7_MOUSE	Ndufs7	6	0.199369	0.103595	0.282422
sp|Q9DBG7|SRPRA_MOUSE	Srpra	4	0.201723	0.841208	0.91911																	sp|P14115|RL27A_MOUSE	Rpl27a	11	0.19793	0.117694	0.304876
sp|O70503|DHB12_MOUSE	Hsd17b12	21	0.200274	0.391845	0.598773																	sp|Q9CPQ8|ATP5L_MOUSE	Atp5l	6	0.196714	0.0466166	0.184581
sp|Q91VE6|MK67I_MOUSE	Nifk	6	0.200149	0.63653	0.784342																	sp|Q6NZN0|RBM26_MOUSE	Rbm26	5	0.196598	0.226824	0.441621
sp|P99024|TBB5_MOUSE	Tubb5	5	0.199506	0.17402	0.384156																	sp|P62192|PRS4_MOUSE	Psmc1	4	0.195965	0.0454427	0.181771
sp|Q9DC70|NDUS7_MOUSE	Ndufs7	6	0.199369	0.103595	0.282422																	sp|Q9Z0R9|FADS2_MOUSE	Fads2	14	0.195537	0.103415	0.282422
sp|P14115|RL27A_MOUSE	Rpl27a	11	0.19793	0.117694	0.304876																	sp|P62983|RS27A_MOUSE	Rps27a	8	0.19512	0.339478	0.557809
sp|Q9CPQ8|ATP5L_MOUSE	Atp5l	6	0.196714	0.0466166	0.184581																	sp|Q9CZM2|RL15_MOUSE	Rpl15	12	0.194663	0.192549	0.4047
sp|Q6NZN0|RBM26_MOUSE	Rbm26	5	0.196598	0.226824	0.441621																	sp|Q8VE22|RT23_MOUSE	Mrps23	5	0.19337	0.0706372	0.227988
sp|P62192|PRS4_MOUSE	Psmc1	4	0.195965	0.0454427	0.181771																	sp|Q9Z130|HNRDL_MOUSE	Hnrnpdl	18	0.193054	0.0483292	0.186926
sp|Q9Z0R9|FADS2_MOUSE	Fads2	14	0.195537	0.103415	0.282422																	sp|Q9ESZ8|GTF2I_MOUSE	Gtf2i	23	0.190061	0.341554	0.558143
sp|P62983|RS27A_MOUSE	Rps27a	8	0.19512	0.339478	0.557809																	sp|Q8CAQ8|MIC60_MOUSE	Immt	50	0.18986	0.0930863	0.267266
sp|Q9CZM2|RL15_MOUSE	Rpl15	12	0.194663	0.192549	0.4047																	sp|Q3TKT4|SMCA4_MOUSE	Smarca4	11	0.18941	0.717247	0.844127
sp|Q8VE22|RT23_MOUSE	Mrps23	5	0.19337	0.0706372	0.227988																	sp|Q8R1M2|H2AJ_MOUSE	H2afj	9	0.189362	0.15375	0.360375
sp|Q9Z130|HNRDL_MOUSE	Hnrnpdl	18	0.193054	0.0483292	0.186926																	sp|Q8VCC9|SPON1_MOUSE	Spon1	18	0.188451	0.784474	0.884251
sp|Q9ESZ8|GTF2I_MOUSE	Gtf2i	23	0.190061	0.341554	0.558143																	sp|Q9CQN1|TRAP1_MOUSE	Trap1	19	0.188397	0.43847	0.634652
sp|Q8CAQ8|MIC60_MOUSE	Immt	50	0.18986	0.0930863	0.267266																	sp|P62754|RS6_MOUSE	Rps6	23	0.188319	0.168737	0.383334
sp|Q3TKT4|SMCA4_MOUSE	Smarca4	11	0.18941	0.717247	0.844127																	sp|O88343|S4A4_MOUSE	Slc4a4	12	0.187935	0.10869	0.28847
sp|Q8R1M2|H2AJ_MOUSE	H2afj	9	0.189362	0.15375	0.360375																	sp|Q8CG48|SMC2_MOUSE	Smc2	13	0.187341	0.208191	0.419369
sp|Q8VCC9|SPON1_MOUSE	Spon1	18	0.188451	0.784474	0.884251																	sp|Q61263|SOAT1_MOUSE	Soat1	4	0.186874	0.206637	0.417139
sp|Q9CQN1|TRAP1_MOUSE	Trap1	19	0.188397	0.43847	0.634652																	sp|Q9D1D4|TMEDA_MOUSE	Tmed10	10	0.185267	0.143775	0.345702
sp|P62754|RS6_MOUSE	Rps6	23	0.188319	0.168737	0.383334																	sp|P51150|RAB7A_MOUSE	Rab7a	6	0.184484	0.104214	0.28301
sp|O88343|S4A4_MOUSE	Slc4a4	12	0.187935	0.10869	0.28847																	sp|Q925I1|ATAD3_MOUSE	Atad3	14	0.18425	0.522974	0.70519
sp|Q8CG48|SMC2_MOUSE	Smc2	13	0.187341	0.208191	0.419369																	sp|Q91YQ5|RPN1_MOUSE	Rpn1	39	0.18406	0.12642	0.318659
sp|Q61263|SOAT1_MOUSE	Soat1	4	0.186874	0.206637	0.417139																	sp|P68254|1433T_MOUSE	Ywhaq	6	0.183612	0.352988	0.564253
sp|Q9D1D4|TMEDA_MOUSE	Tmed10	10	0.185267	0.143775	0.345702																	sp|Q8VE92|RBM4B_MOUSE	Rbm4b	7	0.183054	0.121806	0.312072
sp|P51150|RAB7A_MOUSE	Rab7a	6	0.184484	0.104214	0.28301																	sp|P29416|HEXA_MOUSE	Hexa	5	0.181218	0.344692	0.561262
sp|Q925I1|ATAD3_MOUSE	Atad3	14	0.18425	0.522974	0.70519																	sp|O35465|FKBP8_MOUSE	Fkbp8	9	0.179609	0.547953	0.721401
sp|Q91YQ5|RPN1_MOUSE	Rpn1	39	0.18406	0.12642	0.318659																	sp|Q8BMK4|CKAP4_MOUSE	Ckap4	41	0.179319	0.0585774	0.205094
sp|P68254|1433T_MOUSE	Ywhaq	6	0.183612	0.352988	0.564253																	sp|Q8C3X8|LMF2_MOUSE	Lmf2	5	0.178924	0.226327	0.441621
sp|Q8VE92|RBM4B_MOUSE	Rbm4b	7	0.183054	0.121806	0.312072																	sp|Q91VS7|MGST1_MOUSE	Mgst1	6	0.177694	0.114283	0.29975
sp|P29416|HEXA_MOUSE	Hexa	5	0.181218	0.344692	0.561262																	sp|Q04750|TOP1_MOUSE	Top1	19	0.177208	0.292044	0.512537
sp|O35465|FKBP8_MOUSE	Fkbp8	9	0.179609	0.547953	0.721401																	sp|P14576|SRP54_MOUSE	Srp54	4	0.17622	0.202638	0.413423
sp|Q8BMK4|CKAP4_MOUSE	Ckap4	41	0.179319	0.0585774	0.205094																	sp|Q9CYN2|SPCS2_MOUSE	Spcs2	7	0.175223	0.112718	0.29636
sp|Q8C3X8|LMF2_MOUSE	Lmf2	5	0.178924	0.226327	0.441621																	sp|Q8K273|MMGT1_MOUSE	Mmgt1	4	0.174156	0.959578	0.97556
sp|Q91VS7|MGST1_MOUSE	Mgst1	6	0.177694	0.114283	0.29975																	sp|O08663|MAP2_MOUSE	Metap2	4	0.173438	0.676438	0.813449
sp|Q04750|TOP1_MOUSE	Top1	19	0.177208	0.292044	0.512537																	sp|Q9DBH5|LMAN2_MOUSE	Lman2	7	0.17287	0.844591	0.919719
sp|P14576|SRP54_MOUSE	Srp54	4	0.17622	0.202638	0.413423																	sp|Q8BHC4|DCAKD_MOUSE	Dcakd	9	0.172756	0.289064	0.510944
sp|Q9CYN2|SPCS2_MOUSE	Spcs2	7	0.175223	0.112718	0.29636																	sp|P54071|IDHP_MOUSE	Idh2	8	0.172113	0.266642	0.48493
sp|Q8K273|MMGT1_MOUSE	Mmgt1	4	0.174156	0.959578	0.97556																	sp|Q8VD12|Z385A_MOUSE	Znf385a	4	0.17007	0.510705	0.692783
sp|O08663|MAP2_MOUSE	Metap2	4	0.173438	0.676438	0.813449																	sp|Q91VR5|DDX1_MOUSE	Ddx1	28	0.16906	0.423796	0.622878
sp|Q9DBH5|LMAN2_MOUSE	Lman2	7	0.17287	0.844591	0.919719																	sp|Q3TLH4|PRC2C_MOUSE	Prrc2c	22	0.166368	0.10158	0.278552
sp|Q8BHC4|DCAKD_MOUSE	Dcakd	9	0.172756	0.289064	0.510944																	sp|P62996|TRA2B_MOUSE	Tra2b	19	0.166262	0.125631	0.317811
sp|P54071|IDHP_MOUSE	Idh2	8	0.172113	0.266642	0.48493																	sp|P47963|RL13_MOUSE	Rpl13	21	0.164968	0.350066	0.562885
sp|Q8VD12|Z385A_MOUSE	Znf385a	4	0.17007	0.510705	0.692783																	sp|P62911|RL32_MOUSE	Rpl32	7	0.162559	0.133289	0.33169
sp|Q91VR5|DDX1_MOUSE	Ddx1	28	0.16906	0.423796	0.622878																	sp|O55142|RL35A_MOUSE	Rpl35a	12	0.162404	0.175697	0.385436
sp|Q3TLH4|PRC2C_MOUSE	Prrc2c	22	0.166368	0.10158	0.278552																	sp|Q8VDM4|PSMD2_MOUSE	Psmd2	5	0.162322	0.127844	0.320524
sp|P62996|TRA2B_MOUSE	Tra2b	19	0.166262	0.125631	0.317811																	sp|P47857|PFKAM_MOUSE	Pfkm	19	0.161599	0.748219	0.863898
sp|P47963|RL13_MOUSE	Rpl13	21	0.164968	0.350066	0.562885																	sp|Q922Q8|LRC59_MOUSE	Lrrc59	18	0.161498	0.15077	0.356365
sp|P62911|RL32_MOUSE	Rpl32	7	0.162559	0.133289	0.33169																	sp|Q8C7X2|EMC1_MOUSE	Emc1	27	0.16138	0.334392	0.552749
sp|O55142|RL35A_MOUSE	Rpl35a	12	0.162404	0.175697	0.385436																	sp|Q921F2|TADBP_MOUSE	Tardbp	13	0.16085	0.174465	0.384535
sp|Q8VDM4|PSMD2_MOUSE	Psmd2	5	0.162322	0.127844	0.320524																	sp|P97863|NFIB_MOUSE	Nfib	4	0.160044	0.190529	0.402684
sp|P47857|PFKAM_MOUSE	Pfkm	19	0.161599	0.748219	0.863898																	sp|Q91VM5|RMXL1_MOUSE	Rbmxl1	39	0.160007	0.304724	0.522384
sp|Q922Q8|LRC59_MOUSE	Lrrc59	18	0.161498	0.15077	0.356365																	sp|Q64133|AOFA_MOUSE	Maoa	12	0.159044	0.35126	0.562885
sp|Q8C7X2|EMC1_MOUSE	Emc1	27	0.16138	0.334392	0.552749																	sp|P61222|ABCE1_MOUSE	Abce1	4	0.158868	0.238359	0.454349
sp|Q921F2|TADBP_MOUSE	Tardbp	13	0.16085	0.174465	0.384535																	sp|P35979|RL12_MOUSE	Rpl12	8	0.157742	0.0910297	0.264041
sp|P97863|NFIB_MOUSE	Nfib	4	0.160044	0.190529	0.402684																	sp|Q8VHR5|P66B_MOUSE	Gatad2b	6	0.157513	0.190022	0.402684
sp|Q91VM5|RMXL1_MOUSE	Rbmxl1	39	0.160007	0.304724	0.522384																	sp|P62702|RS4X_MOUSE	Rps4x	34	0.15659	0.367769	0.576925
sp|Q64133|AOFA_MOUSE	Maoa	12	0.159044	0.35126	0.562885																	sp|P09055|ITB1_MOUSE	Itgb1	4	0.155579	0.261964	0.480154
sp|P61222|ABCE1_MOUSE	Abce1	4	0.158868	0.238359	0.454349																	sp|Q69ZK0|PREX1_MOUSE	Prex1	12	0.154078	0.231039	0.445177
sp|P35979|RL12_MOUSE	Rpl12	8	0.157742	0.0910297	0.264041																	sp|O35685|NUDC_MOUSE	Nudc	4	0.152116	0.143658	0.345702
sp|Q8VHR5|P66B_MOUSE	Gatad2b	6	0.157513	0.190022	0.402684																	sp|Q64152|BTF3_MOUSE	Btf3	7	0.150905	0.221257	0.438764
sp|P62702|RS4X_MOUSE	Rps4x	34	0.15659	0.367769	0.576925																	sp|Q52KI8|SRRM1_MOUSE	Srrm1	17	0.150199	0.719674	0.845542
sp|P09055|ITB1_MOUSE	Itgb1	4	0.155579	0.261964	0.480154																	sp|Q9QYS9|QKI_MOUSE	Qki	20	0.149847	0.287618	0.509869
sp|Q69ZK0|PREX1_MOUSE	Prex1	12	0.154078	0.231039	0.445177																	sp|Q8BVY0|RL1D1_MOUSE	Rsl1d1	26	0.149802	0.421908	0.622538
sp|O35685|NUDC_MOUSE	Nudc	4	0.152116	0.143658	0.345702																	sp|O08582|GTPB1_MOUSE	Gtpbp1	6	0.149455	0.89844	0.941351
sp|Q64152|BTF3_MOUSE	Btf3	7	0.150905	0.221257	0.438764																	sp|P49718|MCM5_MOUSE	Mcm5	22	0.148781	0.169897	0.383334
sp|Q52KI8|SRRM1_MOUSE	Srrm1	17	0.150199	0.719674	0.845542																	sp|Q91WJ8|FUBP1_MOUSE	Fubp1	18	0.148777	0.935689	0.965252
sp|Q9QYS9|QKI_MOUSE	Qki	20	0.149847	0.287618	0.509869																	sp|Q8CCS6|PABP2_MOUSE	Pabpn1	8	0.147753	0.185342	0.399111
sp|Q8BVY0|RL1D1_MOUSE	Rsl1d1	26	0.149802	0.421908	0.622538																	sp|Q9JKF1|IQGA1_MOUSE	Iqgap1	7	0.145802	0.375244	0.586326
sp|O08582|GTPB1_MOUSE	Gtpbp1	6	0.149455	0.89844	0.941351																	sp|P48962|ADT1_MOUSE	Slc25a4	14	0.145482	0.0657461	0.218738
sp|P49718|MCM5_MOUSE	Mcm5	22	0.148781	0.169897	0.383334																	sp|Q9WUK4|RFC2_MOUSE	Rfc2	4	0.143343	0.895779	0.940669
sp|Q91WJ8|FUBP1_MOUSE	Fubp1	18	0.148777	0.935689	0.965252																	sp|P19253|RL13A_MOUSE	Rpl13a	13	0.142896	0.26054	0.480154
sp|Q8CCS6|PABP2_MOUSE	Pabpn1	8	0.147753	0.185342	0.399111																	sp|Q5F2E8|TAOK1_MOUSE	Taok1	5	0.141314	0.365077	0.575919
sp|Q9JKF1|IQGA1_MOUSE	Iqgap1	7	0.145802	0.375244	0.586326																	sp|P54823|DDX6_MOUSE	Ddx6	8	0.140914	0.170191	0.383334
sp|P48962|ADT1_MOUSE	Slc25a4	14	0.145482	0.0657461	0.218738																	sp|Q9JKN5|OLIG1_MOUSE	Olig1	4	0.14085	0.703637	0.833171
sp|Q9WUK4|RFC2_MOUSE	Rfc2	4	0.143343	0.895779	0.940669																	sp|P60710|ACTB_MOUSE	Actb	33	0.138389	0.215631	0.431261
sp|P19253|RL13A_MOUSE	Rpl13a	13	0.142896	0.26054	0.480154																	sp|Q7TPV4|MBB1A_MOUSE	Mybbp1a	55	0.138337	0.146949	0.350879
sp|Q5F2E8|TAOK1_MOUSE	Taok1	5	0.141314	0.365077	0.575919																	sp|Q922Q4|P5CR2_MOUSE	Pycr2	5	0.138314	0.201145	0.412274
sp|P54823|DDX6_MOUSE	Ddx6	8	0.140914	0.170191	0.383334																	sp|Q80UM3|NAA15_MOUSE	Naa15	6	0.136685	0.160712	0.37173
sp|Q9JKN5|OLIG1_MOUSE	Olig1	4	0.14085	0.703637	0.833171																	sp|Q3TEA8|HP1B3_MOUSE	Hp1bp3	32	0.136197	0.283524	0.505162
sp|P60710|ACTB_MOUSE	Actb	33	0.138389	0.215631	0.431261																	sp|Q9JKN6|NOVA1_MOUSE	Nova1	4	0.13529	0.271603	0.489513
sp|Q7TPV4|MBB1A_MOUSE	Mybbp1a	55	0.138337	0.146949	0.350879																	sp|Q9CXW4|RL11_MOUSE	Rpl11	13	0.134899	0.311781	0.530594
sp|Q922Q4|P5CR2_MOUSE	Pycr2	5	0.138314	0.201145	0.412274																	sp|Q9DCN2|NB5R3_MOUSE	Cyb5r3	7	0.134895	0.255443	0.474394
sp|Q80UM3|NAA15_MOUSE	Naa15	6	0.136685	0.160712	0.37173																	sp|Q9CRD2|EMC2_MOUSE	Emc2	12	0.134719	0.157918	0.367285
sp|Q3TEA8|HP1B3_MOUSE	Hp1bp3	32	0.136197	0.283524	0.505162																	sp|P35278|RAB5C_MOUSE	Rab5c	6	0.13366	0.418911	0.619759
sp|Q9JKN6|NOVA1_MOUSE	Nova1	4	0.13529	0.271603	0.489513																	sp|Q3V3R1|C1TM_MOUSE	Mthfd1l	14	0.132809	0.183823	0.397582
sp|Q9CXW4|RL11_MOUSE	Rpl11	13	0.134899	0.311781	0.530594																	sp|P12970|RL7A_MOUSE	Rpl7a	30	0.13216	0.217402	0.432953
sp|Q9DCN2|NB5R3_MOUSE	Cyb5r3	7	0.134895	0.255443	0.474394																	sp|Q8R323|RFC3_MOUSE	Rfc3	6	0.131891	0.314369	0.530671
sp|Q9CRD2|EMC2_MOUSE	Emc2	12	0.134719	0.157918	0.367285																	sp|P27659|RL3_MOUSE	Rpl3	32	0.13148	0.325535	0.542816
sp|P35278|RAB5C_MOUSE	Rab5c	6	0.13366	0.418911	0.619759																	sp|Q6NVF9|CPSF6_MOUSE	Cpsf6	4	0.130553	0.298104	0.517352
sp|Q3V3R1|C1TM_MOUSE	Mthfd1l	14	0.132809	0.183823	0.397582																	sp|P54775|PRS6B_MOUSE	Psmc4	5	0.127101	0.660814	0.799124
sp|P12970|RL7A_MOUSE	Rpl7a	30	0.13216	0.217402	0.432953																	sp|Q9WTM5|RUVB2_MOUSE	Ruvbl2	7	0.126184	0.838756	0.917859
sp|Q8R323|RFC3_MOUSE	Rfc3	6	0.131891	0.314369	0.530671																	sp|P05213|TBA1B_MOUSE	Tuba1b	30	0.125895	0.756305	0.867571
sp|P27659|RL3_MOUSE	Rpl3	32	0.13148	0.325535	0.542816																	sp|Q9DCF9|SSRG_MOUSE	Ssr3	6	0.125514	0.204142	0.414783
sp|Q6NVF9|CPSF6_MOUSE	Cpsf6	4	0.130553	0.298104	0.517352																	sp|Q60865|CAPR1_MOUSE	Caprin1	15	0.125499	0.949824	0.971269
sp|P54775|PRS6B_MOUSE	Psmc4	5	0.127101	0.660814	0.799124																	sp|Q9EPE9|AT131_MOUSE	Atp13a1	12	0.124466	0.232583	0.446713
sp|Q9WTM5|RUVB2_MOUSE	Ruvbl2	7	0.126184	0.838756	0.917859																	sp|Q62086|PON2_MOUSE	Pon2	4	0.121637	0.19933	0.410118
sp|P05213|TBA1B_MOUSE	Tuba1b	30	0.125895	0.756305	0.867571																	sp|Q4FK66|PR38A_MOUSE	Prpf38a	6	0.120546	0.623134	0.773545
sp|Q9DCF9|SSRG_MOUSE	Ssr3	6	0.125514	0.204142	0.414783																	sp|Q91V61|SFXN3_MOUSE	Sfxn3	5	0.119889	0.13824	0.33696
sp|Q60865|CAPR1_MOUSE	Caprin1	15	0.125499	0.949824	0.971269																	sp|Q99LC5|ETFA_MOUSE	Etfa	8	0.119682	0.238501	0.454349
sp|Q9EPE9|AT131_MOUSE	Atp13a1	12	0.124466	0.232583	0.446713																	sp|Q3UPL0|SC31A_MOUSE	Sec31a	11	0.117202	0.619127	0.772691
sp|Q62086|PON2_MOUSE	Pon2	4	0.121637	0.19933	0.410118																	sp|Q6PGN3|DCLK2_MOUSE	Dclk2	13	0.11643	0.173497	0.383819
sp|Q4FK66|PR38A_MOUSE	Prpf38a	6	0.120546	0.623134	0.773545																	sp|Q9EP69|SAC1_MOUSE	Sacm1l	14	0.116055	0.655127	0.797052
sp|Q91V61|SFXN3_MOUSE	Sfxn3	5	0.119889	0.13824	0.33696																	sp|O09118|NET1_MOUSE	Ntn1	9	0.114495	0.417389	0.618811
sp|Q99LC5|ETFA_MOUSE	Etfa	8	0.119682	0.238501	0.454349																	sp|P35550|FBRL_MOUSE	Fbl	17	0.113914	0.427303	0.625582
sp|Q3UPL0|SC31A_MOUSE	Sec31a	11	0.117202	0.619127	0.772691																	sp|Q8BGY2|IF5A2_MOUSE	Eif5a2	4	0.111251	0.356	0.565412
sp|Q6PGN3|DCLK2_MOUSE	Dclk2	13	0.11643	0.173497	0.383819																	sp|Q9Z0N1|IF2G_MOUSE	Eif2s3x	15	0.109135	0.498727	0.686401
sp|Q9EP69|SAC1_MOUSE	Sacm1l	14	0.116055	0.655127	0.797052																	sp|Q8VCM8|NCLN_MOUSE	Ncln	15	0.107747	0.152827	0.359477
sp|O09118|NET1_MOUSE	Ntn1	9	0.114495	0.417389	0.618811																	sp|Q6PFR5|TRA2A_MOUSE	Tra2a	8	0.10766	0.23256	0.446713
sp|P35550|FBRL_MOUSE	Fbl	17	0.113914	0.427303	0.625582																	sp|Q03963|E2AK2_MOUSE	Eif2ak2	14	0.10763	0.181148	0.394401
sp|Q8BGY2|IF5A2_MOUSE	Eif5a2	4	0.111251	0.356	0.565412																	sp|O88291|ZN326_MOUSE	Znf326	14	0.106995	0.671805	0.808931
sp|Q9Z0N1|IF2G_MOUSE	Eif2s3x	15	0.109135	0.498727	0.686401																	sp|Q9QYF1|RDH11_MOUSE	Rdh11	6	0.106958	0.588426	0.747648
sp|Q8VCM8|NCLN_MOUSE	Ncln	15	0.107747	0.152827	0.359477																	sp|Q9QYF9|NDRG3_MOUSE	Ndrg3	4	0.104239	0.225681	0.441621
sp|Q6PFR5|TRA2A_MOUSE	Tra2a	8	0.10766	0.23256	0.446713																	sp|Q61070|EI24_MOUSE	Ei24	4	0.103828	0.236398	0.452183
sp|Q03963|E2AK2_MOUSE	Eif2ak2	14	0.10763	0.181148	0.394401																	sp|P13011|ACOD2_MOUSE	Scd2	4	0.103551	0.458026	0.654856
sp|O88291|ZN326_MOUSE	Znf326	14	0.106995	0.671805	0.808931																	sp|Q8VBZ3|CLPT1_MOUSE	Clptm1	7	0.103244	0.153181	0.359642
sp|Q9QYF1|RDH11_MOUSE	Rdh11	6	0.106958	0.588426	0.747648																	sp|Q3U0V1|FUBP2_MOUSE	Khsrp	29	0.103067	0.533572	0.710244
sp|Q9QYF9|NDRG3_MOUSE	Ndrg3	4	0.104239	0.225681	0.441621																	sp|P31938|MP2K1_MOUSE	Map2k1	5	0.102281	0.9555	0.973439
sp|Q61070|EI24_MOUSE	Ei24	4	0.103828	0.236398	0.452183																	sp|P35700|PRDX1_MOUSE	Prdx1	6	0.102249	0.526732	0.706328
sp|P13011|ACOD2_MOUSE	Scd2	4	0.103551	0.458026	0.654856																	sp|Q8VEK3|HNRPU_MOUSE	Hnrnpu	58	0.101853	0.271269	0.489513
sp|Q8VBZ3|CLPT1_MOUSE	Clptm1	7	0.103244	0.153181	0.359642																	sp|Q80UM7|MOGS_MOUSE	Mogs	4	0.101757	0.49638	0.686401
sp|Q3U0V1|FUBP2_MOUSE	Khsrp	29	0.103067	0.533572	0.710244																	sp|Q8BJW6|EIF2A_MOUSE	Eif2a	4	0.101673	0.288544	0.510864
sp|P31938|MP2K1_MOUSE	Map2k1	5	0.102281	0.9555	0.973439																	sp|Q9QYJ0|DNJA2_MOUSE	Dnaja2	5	0.100959	0.58397	0.745524
sp|P35700|PRDX1_MOUSE	Prdx1	6	0.102249	0.526732	0.706328																	sp|O70492|SNX3_MOUSE	Snx3	8	0.100231	0.540527	0.715268
sp|Q8VEK3|HNRPU_MOUSE	Hnrnpu	58	0.101853	0.271269	0.489513																	sp|Q9CU62|SMC1A_MOUSE	Smc1a	27	0.0992175	0.952233	0.972439
sp|Q80UM7|MOGS_MOUSE	Mogs	4	0.101757	0.49638	0.686401																	sp|O54984|ASNA_MOUSE	Asna1	4	0.0990962	0.290045	0.510944
sp|Q8BJW6|EIF2A_MOUSE	Eif2a	4	0.101673	0.288544	0.510864																	sp|Q9QZQ8|H2AY_MOUSE	H2afy	12	0.0989489	0.184279	0.397582
sp|Q9QYJ0|DNJA2_MOUSE	Dnaja2	5	0.100959	0.58397	0.745524																	sp|Q9ERU3|ZNF22_MOUSE	Znf22	7	0.0978373	0.396436	0.603683
sp|O70492|SNX3_MOUSE	Snx3	8	0.100231	0.540527	0.715268																	sp|Q8BL97|SRSF7_MOUSE	Srsf7	10	0.0971597	0.704769	0.83361
sp|Q9CU62|SMC1A_MOUSE	Smc1a	27	0.0992175	0.952233	0.972439																	sp|Q61035|SYHC_MOUSE	Hars	6	0.0960413	0.466289	0.66172
sp|O54984|ASNA_MOUSE	Asna1	4	0.0990962	0.290045	0.510944																	sp|Q9CQY5|MAGT1_MOUSE	Magt1	4	0.0951792	0.344992	0.561262
sp|Q9QZQ8|H2AY_MOUSE	H2afy	12	0.0989489	0.184279	0.397582																	sp|Q3UUQ7|PGAP1_MOUSE	Pgap1	7	0.0946534	0.259162	0.48003
sp|Q9ERU3|ZNF22_MOUSE	Znf22	7	0.0978373	0.396436	0.603683																	sp|Q6P542|ABCF1_MOUSE	Abcf1	11	0.0942972	0.451131	0.648298
sp|Q8BL97|SRSF7_MOUSE	Srsf7	10	0.0971597	0.704769	0.83361																	sp|Q9WVA3|BUB3_MOUSE	Bub3	5	0.0939393	0.588305	0.747648
sp|Q61035|SYHC_MOUSE	Hars	6	0.0960413	0.466289	0.66172																	sp|O88712|CTBP1_MOUSE	Ctbp1	5	0.0923573	0.889232	0.939546
sp|Q9CQY5|MAGT1_MOUSE	Magt1	4	0.0951792	0.344992	0.561262																	sp|P41105|RL28_MOUSE	Rpl28	15	0.0922507	0.490878	0.68232
sp|Q3UUQ7|PGAP1_MOUSE	Pgap1	7	0.0946534	0.259162	0.48003																	sp|Q99PU8|DHX30_MOUSE	Dhx30	10	0.0903967	0.299033	0.517512
sp|Q6P542|ABCF1_MOUSE	Abcf1	11	0.0942972	0.451131	0.648298																	sp|Q9CPR4|RL17_MOUSE	Rpl17	16	0.0894213	0.485305	0.676631
sp|Q9WVA3|BUB3_MOUSE	Bub3	5	0.0939393	0.588305	0.747648																	sp|P53026|RL10A_MOUSE	Rpl10a	13	0.08918	0.196128	0.407344
sp|O88712|CTBP1_MOUSE	Ctbp1	5	0.0923573	0.889232	0.939546																	sp|Q91ZS8|RED1_MOUSE	Adarb1	5	0.0891497	0.497957	0.686401
sp|P41105|RL28_MOUSE	Rpl28	15	0.0922507	0.490878	0.68232																	sp|P51410|RL9_MOUSE	Rpl9	13	0.0864484	0.782294	0.883621
sp|Q99PU8|DHX30_MOUSE	Dhx30	10	0.0903967	0.299033	0.517512																	sp|P11440|CDK1_MOUSE	Cdk1	4	0.0863295	0.168168	0.382671
sp|Q9CPR4|RL17_MOUSE	Rpl17	16	0.0894213	0.485305	0.676631																	sp|Q02780|NFIA_MOUSE	Nfia	7	0.0857248	0.549676	0.721401
sp|P53026|RL10A_MOUSE	Rpl10a	13	0.08918	0.196128	0.407344																	sp|Q9CWF2|TBB2B_MOUSE	Tubb2b	9	0.0848277	0.988452	0.99278
sp|Q91ZS8|RED1_MOUSE	Adarb1	5	0.0891497	0.497957	0.686401																	sp|P39447|ZO1_MOUSE	Tjp1	24	0.0844428	0.921463	0.956904
sp|P51410|RL9_MOUSE	Rpl9	13	0.0864484	0.782294	0.883621																	sp|O70378|EMC8_MOUSE	Emc8	9	0.0839804	0.535079	0.711412
sp|P11440|CDK1_MOUSE	Cdk1	4	0.0863295	0.168168	0.382671																	sp|O55143|AT2A2_MOUSE	Atp2a2	38	0.0818043	0.427988	0.625932
sp|Q02780|NFIA_MOUSE	Nfia	7	0.0857248	0.549676	0.721401																	sp|Q99LR1|ABD12_MOUSE	Abhd12	11	0.0814611	0.198993	0.410118
sp|Q9CWF2|TBB2B_MOUSE	Tubb2b	9	0.0848277	0.988452	0.99278																	sp|P18653|KS6A1_MOUSE	Rps6ka1	8	0.0801054	0.913336	0.951985
sp|P39447|ZO1_MOUSE	Tjp1	24	0.0844428	0.921463	0.956904																	sp|Q00PI9|HNRL2_MOUSE	Hnrnpul2	27	0.0789275	0.941828	0.96759
sp|O70378|EMC8_MOUSE	Emc8	9	0.0839804	0.535079	0.711412																	sp|P08226|APOE_MOUSE	Apoe	19	0.0764387	0.540426	0.715268
sp|O55143|AT2A2_MOUSE	Atp2a2	38	0.0818043	0.427988	0.625932																	sp|Q8BI72|CARF_MOUSE	Cdkn2aip	5	0.0761952	0.742474	0.862228
sp|Q99LR1|ABD12_MOUSE	Abhd12	11	0.0814611	0.198993	0.410118																	sp|P17426|AP2A1_MOUSE	Ap2a1	12	0.0761812	0.308195	0.527048
sp|P18653|KS6A1_MOUSE	Rps6ka1	8	0.0801054	0.913336	0.951985																	sp|P03995|GFAP_MOUSE	Gfap	55	0.0754449	0.378788	0.589331
sp|Q00PI9|HNRL2_MOUSE	Hnrnpul2	27	0.0789275	0.941828	0.96759																	sp|Q99KI3|EMC3_MOUSE	Emc3	8	0.0752432	0.888177	0.939546
sp|P08226|APOE_MOUSE	Apoe	19	0.0764387	0.540426	0.715268																	sp|Q60605|MYL6_MOUSE	Myl6	6	0.0749195	0.340089	0.557809
sp|Q8BI72|CARF_MOUSE	Cdkn2aip	5	0.0761952	0.742474	0.862228																	sp|Q8BKC5|IPO5_MOUSE	Ipo5	4	0.0734027	0.780949	0.883363
sp|P17426|AP2A1_MOUSE	Ap2a1	12	0.0761812	0.308195	0.527048																	sp|B9EJI9|T229A_MOUSE	Tmem229a	4	0.0732011	0.579952	0.744289
sp|P03995|GFAP_MOUSE	Gfap	55	0.0754449	0.378788	0.589331																	sp|Q9QXZ0|MACF1_MOUSE	Macf1	17	0.0722264	0.727254	0.84891
sp|Q99KI3|EMC3_MOUSE	Emc3	8	0.0752432	0.888177	0.939546																	sp|P46735|MYO1B_MOUSE	Myo1b	11	0.0708078	0.821492	0.903191
sp|Q60605|MYL6_MOUSE	Myl6	6	0.0749195	0.340089	0.557809																	sp|Q9DBG6|RPN2_MOUSE	Rpn2	17	0.0706366	0.323701	0.541043
sp|Q8BKC5|IPO5_MOUSE	Ipo5	4	0.0734027	0.780949	0.883363																	sp|Q7TMF2|ERI1_MOUSE	Eri1	4	0.0705146	0.856212	0.927091
sp|B9EJI9|T229A_MOUSE	Tmem229a	4	0.0732011	0.579952	0.744289																	sp|P62334|PRS10_MOUSE	Psmc6	9	0.0661975	0.188489	0.402276
sp|Q9QXZ0|MACF1_MOUSE	Macf1	17	0.0722264	0.727254	0.84891																	sp|Q9D024|CCD47_MOUSE	Ccdc47	19	0.0656976	0.251831	0.469845
sp|P46735|MYO1B_MOUSE	Myo1b	11	0.0708078	0.821492	0.903191																	sp|Q91W43|GCSP_MOUSE	Gldc	9	0.0644467	0.582301	0.74526
sp|Q9DBG6|RPN2_MOUSE	Rpn2	17	0.0706366	0.323701	0.541043																	sp|Q8BTM8|FLNA_MOUSE	Flna	13	0.0640615	0.425417	0.624123
sp|Q7TMF2|ERI1_MOUSE	Eri1	4	0.0705146	0.856212	0.927091																	sp|P47964|RL36_MOUSE	Rpl36	4	0.0633241	0.542299	0.716938
sp|P62334|PRS10_MOUSE	Psmc6	9	0.0661975	0.188489	0.402276																	sp|Q64331|MYO6_MOUSE	Myo6	29	0.0627837	0.752102	0.864755
sp|Q9D024|CCD47_MOUSE	Ccdc47	19	0.0656976	0.251831	0.469845																	sp|Q9CY27|TECR_MOUSE	Tecr	11	0.0621725	0.250021	0.468665
sp|Q91W43|GCSP_MOUSE	Gldc	9	0.0644467	0.582301	0.74526																	sp|Q9EP72|EMC7_MOUSE	Emc7	5	0.0610577	0.912495	0.951815
sp|Q8BTM8|FLNA_MOUSE	Flna	13	0.0640615	0.425417	0.624123																	sp|Q6DFW4|NOP58_MOUSE	Nop58	17	0.0609957	0.686974	0.819832
sp|P47964|RL36_MOUSE	Rpl36	4	0.0633241	0.542299	0.716938																	sp|Q9QY81|PO210_MOUSE	Nup210	5	0.0609053	0.893273	0.940669
sp|Q64331|MYO6_MOUSE	Myo6	29	0.0627837	0.752102	0.864755																	sp|P20152|VIME_MOUSE	Vim	69	0.0607977	0.247594	0.465358
sp|Q9CY27|TECR_MOUSE	Tecr	11	0.0621725	0.250021	0.468665																	sp|Q91ZJ5|UGPA_MOUSE	Ugp2	4	0.0605173	0.430942	0.628751
sp|Q9EP72|EMC7_MOUSE	Emc7	5	0.0610577	0.912495	0.951815																	sp|P35564|CALX_MOUSE	Canx	29	0.0605141	0.413081	0.617131
sp|Q6DFW4|NOP58_MOUSE	Nop58	17	0.0609957	0.686974	0.819832																	sp|Q9CZX0|ELP3_MOUSE	Elp3	6	0.0605122	0.739377	0.859403
sp|Q9QY81|PO210_MOUSE	Nup210	5	0.0609053	0.893273	0.940669																	sp|Q62167|DDX3X_MOUSE	Ddx3x	36	0.0603788	0.410731	0.616097
sp|P20152|VIME_MOUSE	Vim	69	0.0607977	0.247594	0.465358																	sp|Q9CR67|TMM33_MOUSE	Tmem33	5	0.0600345	0.274123	0.491325
sp|Q91ZJ5|UGPA_MOUSE	Ugp2	4	0.0605173	0.430942	0.628751																	sp|Q60714|S27A1_MOUSE	Slc27a1	16	0.0579954	0.423021	0.622878
sp|P35564|CALX_MOUSE	Canx	29	0.0605141	0.413081	0.617131																	sp|P47962|RL5_MOUSE	Rpl5	20	0.0578491	0.32231	0.540004
sp|Q9CZX0|ELP3_MOUSE	Elp3	6	0.0605122	0.739377	0.859403																	sp|Q9EST5|AN32B_MOUSE	Anp32b	6	0.0575637	0.385778	0.595201
sp|Q62167|DDX3X_MOUSE	Ddx3x	36	0.0603788	0.410731	0.616097																	sp|Q9JIW9|RALB_MOUSE	Ralb	4	0.0574959	0.55016	0.721401
sp|Q9CR67|TMM33_MOUSE	Tmem33	5	0.0600345	0.274123	0.491325																	sp|Q8R326|PSPC1_MOUSE	Pspc1	10	0.055567	0.785306	0.884251
sp|Q60714|S27A1_MOUSE	Slc27a1	16	0.0579954	0.423021	0.622878																	sp|Q05D44|IF2P_MOUSE	Eif5b	14	0.0546408	0.989711	0.99278
sp|P47962|RL5_MOUSE	Rpl5	20	0.0578491	0.32231	0.540004																	sp|O08547|SC22B_MOUSE	Sec22b	13	0.0545338	0.209576	0.420951
sp|Q9EST5|AN32B_MOUSE	Anp32b	6	0.0575637	0.385778	0.595201																	sp|Q91Z67|SRGP2_MOUSE	Srgap2	11	0.0533576	0.706048	0.833718
sp|Q9JIW9|RALB_MOUSE	Ralb	4	0.0574959	0.55016	0.721401																	sp|Q9DBZ1|IKIP_MOUSE	Ikbip	5	0.0501741	0.493448	0.684586
sp|Q8R326|PSPC1_MOUSE	Pspc1	10	0.055567	0.785306	0.884251																	sp|P97742|CPT1A_MOUSE	Cpt1a	6	0.0501249	0.596411	0.752346
sp|Q05D44|IF2P_MOUSE	Eif5b	14	0.0546408	0.989711	0.99278																	sp|P61358|RL27_MOUSE	Rpl27	15	0.0494652	0.497735	0.686401
sp|O08547|SC22B_MOUSE	Sec22b	13	0.0545338	0.209576	0.420951																	sp|Q922D8|C1TC_MOUSE	Mthfd1	10	0.0483911	0.420705	0.621758
sp|Q91Z67|SRGP2_MOUSE	Srgap2	11	0.0533576	0.706048	0.833718																	sp|P32233|DRG1_MOUSE	Drg1	7	0.0479811	0.703804	0.833171
sp|Q9DBZ1|IKIP_MOUSE	Ikbip	5	0.0501741	0.493448	0.684586																	sp|O70318|E41L2_MOUSE	Epb41l2	14	0.047565	0.381711	0.592179
sp|P97742|CPT1A_MOUSE	Cpt1a	6	0.0501249	0.596411	0.752346																	sp|Q3TAS6|EMC10_MOUSE	Emc10	4	0.0464924	0.987098	0.99278
sp|P61358|RL27_MOUSE	Rpl27	15	0.0494652	0.497735	0.686401																	sp|O70310|NMT1_MOUSE	Nmt1	8	0.0453123	0.773355	0.878063
sp|Q922D8|C1TC_MOUSE	Mthfd1	10	0.0483911	0.420705	0.621758																	sp|P97311|MCM6_MOUSE	Mcm6	16	0.0447504	0.924405	0.95925
sp|P32233|DRG1_MOUSE	Drg1	7	0.0479811	0.703804	0.833171																	sp|P56391|CX6B1_MOUSE	Cox6b1	5	0.0431542	0.351602	0.562885
sp|O70318|E41L2_MOUSE	Epb41l2	14	0.047565	0.381711	0.592179																	sp|Q9CR57|RL14_MOUSE	Rpl14	10	0.0418479	0.243335	0.460435
sp|Q3TAS6|EMC10_MOUSE	Emc10	4	0.0464924	0.987098	0.99278																	sp|A2APV2|FMNL2_MOUSE	Fmnl2	10	0.0405086	0.814456	0.897564
sp|O70310|NMT1_MOUSE	Nmt1	8	0.0453123	0.773355	0.878063																	sp|Q9DC28|KC1D_MOUSE	Csnk1d	4	0.0392689	0.973259	0.983862
sp|P97311|MCM6_MOUSE	Mcm6	16	0.0447504	0.924405	0.95925																	sp|Q5XJY5|COPD_MOUSE	Arcn1	5	0.0375404	0.929729	0.962104
sp|P56391|CX6B1_MOUSE	Cox6b1	5	0.0431542	0.351602	0.562885																	sp|Q8CCJ3|UFL1_MOUSE	Ufl1	4	0.0367219	0.391932	0.598773
sp|Q9CR57|RL14_MOUSE	Rpl14	10	0.0418479	0.243335	0.460435																	sp|Q9D7H3|RTCA_MOUSE	RtcA	12	0.0364145	0.500691	0.686401
sp|A2APV2|FMNL2_MOUSE	Fmnl2	10	0.0405086	0.814456	0.897564																	sp|Q9Z1Z0|USO1_MOUSE	Uso1	4	0.0358928	0.987886	0.99278
sp|Q9DC28|KC1D_MOUSE	Csnk1d	4	0.0392689	0.973259	0.983862																	sp|Q569Z6|TR150_MOUSE	Thrap3	54	0.0355439	0.491329	0.68232
sp|Q5XJY5|COPD_MOUSE	Arcn1	5	0.0375404	0.929729	0.962104																	sp|Q61881|MCM7_MOUSE	Mcm7	13	0.0347375	0.636984	0.784342
sp|Q8CCJ3|UFL1_MOUSE	Ufl1	4	0.0367219	0.391932	0.598773																	sp|Q8K019|BCLF1_MOUSE	Bclaf1	52	0.0346546	0.751051	0.864489
sp|Q9D7H3|RTCA_MOUSE	RtcA	12	0.0364145	0.500691	0.686401																	sp|Q91ZW3|SMCA5_MOUSE	Smarca5	32	0.0336599	0.963753	0.978535
sp|Q9Z1Z0|USO1_MOUSE	Uso1	4	0.0358928	0.987886	0.99278																	sp|Q60737|CSK21_MOUSE	Csnk2a1	12	0.0313111	0.613573	0.770533
sp|Q569Z6|TR150_MOUSE	Thrap3	54	0.0355439	0.491329	0.68232																	sp|P70168|IMB1_MOUSE	Kpnb1	6	0.0300674	0.46754	0.66172
sp|Q61881|MCM7_MOUSE	Mcm7	13	0.0347375	0.636984	0.784342																	sp|Q62189|SNRPA_MOUSE	Snrpa	7	0.0299686	0.794495	0.889531
sp|Q8K019|BCLF1_MOUSE	Bclaf1	52	0.0346546	0.751051	0.864489																	sp|O88685|PRS6A_MOUSE	Psmc3	6	0.0298388	0.882912	0.9358
sp|Q91ZW3|SMCA5_MOUSE	Smarca5	32	0.0336599	0.963753	0.978535																	sp|P14869|RLA0_MOUSE	Rplp0	16	0.0293053	0.496544	0.686401
sp|Q60737|CSK21_MOUSE	Csnk2a1	12	0.0313111	0.613573	0.770533																	sp|Q6PAQ4|REXO4_MOUSE	Rexo4	5	0.0290848	0.974051	0.983862
sp|P70168|IMB1_MOUSE	Kpnb1	6	0.0300674	0.46754	0.66172																	sp|P28652|KCC2B_MOUSE	Camk2b	11	0.0283318	0.638896	0.784342
sp|Q62189|SNRPA_MOUSE	Snrpa	7	0.0299686	0.794495	0.889531																	sp|Q9D5T0|ATAD1_MOUSE	Atad1	8	0.0283034	0.843482	0.919448
sp|O88685|PRS6A_MOUSE	Psmc3	6	0.0298388	0.882912	0.9358																	sp|Q99ME9|NOG1_MOUSE	Gtpbp4	7	0.0274257	0.655532	0.797052
sp|P14869|RLA0_MOUSE	Rplp0	16	0.0293053	0.496544	0.686401																	sp|Q9QYR6|MAP1A_MOUSE	Map1a	19	0.0267621	0.927125	0.960653
sp|Q6PAQ4|REXO4_MOUSE	Rexo4	5	0.0290848	0.974051	0.983862																	sp|Q922F4|TBB6_MOUSE	Tubb6	9	0.0253656	0.432764	0.629022
sp|P28652|KCC2B_MOUSE	Camk2b	11	0.0283318	0.638896	0.784342																	sp|Q3TVI8|PBIP1_MOUSE	Pbxip1	19	0.0253602	0.743693	0.862432
sp|Q9D5T0|ATAD1_MOUSE	Atad1	8	0.0283034	0.843482	0.919448																	sp|Q9ER88|RT29_MOUSE	Dap3	5	0.0249559	0.909881	0.949794
sp|Q99ME9|NOG1_MOUSE	Gtpbp4	7	0.0274257	0.655532	0.797052																	sp|Q9D8E6|RL4_MOUSE	Rpl4	38	0.0239912	0.408493	0.614951
sp|Q9QYR6|MAP1A_MOUSE	Map1a	19	0.0267621	0.927125	0.960653																	sp|Q8K363|DDX18_MOUSE	Ddx18	7	0.0236163	0.414058	0.617131
sp|Q922F4|TBB6_MOUSE	Tubb6	9	0.0253656	0.432764	0.629022																	sp|Q07646|MEST_MOUSE	Mest	8	0.0231061	0.652673	0.796136
sp|Q3TVI8|PBIP1_MOUSE	Pbxip1	19	0.0253602	0.743693	0.862432																	sp|Q501J6|DDX17_MOUSE	Ddx17	20	0.0230488	0.514447	0.696512
sp|Q9ER88|RT29_MOUSE	Dap3	5	0.0249559	0.909881	0.949794																	sp|Q99PU5|ACBG1_MOUSE	Acsbg1	16	0.0229772	0.411413	0.616173
sp|Q9D8E6|RL4_MOUSE	Rpl4	38	0.0239912	0.408493	0.614951																	sp|Q99KG3|RBM10_MOUSE	Rbm10	6	0.0223854	0.953045	0.972439
sp|Q8K363|DDX18_MOUSE	Ddx18	7	0.0236163	0.414058	0.617131																	sp|P84104|SRSF3_MOUSE	Srsf3	15	0.021864	0.615071	0.771036
sp|Q07646|MEST_MOUSE	Mest	8	0.0231061	0.652673	0.796136																	sp|Q9JLI8|SART3_MOUSE	Sart3	18	0.0214112	0.867826	0.932747
sp|Q501J6|DDX17_MOUSE	Ddx17	20	0.0230488	0.514447	0.696512																	sp|Q9QZD9|EIF3I_MOUSE	Eif3i	7	0.0213938	0.801099	0.891869
sp|Q99PU5|ACBG1_MOUSE	Acsbg1	16	0.0229772	0.411413	0.616173																	sp|Q9WV55|VAPA_MOUSE	Vapa	10	0.0205527	0.829719	0.909388
sp|Q99KG3|RBM10_MOUSE	Rbm10	6	0.0223854	0.953045	0.972439																	sp|P26231|CTNA1_MOUSE	Ctnna1	5	0.0202539	0.931597	0.962444
sp|P84104|SRSF3_MOUSE	Srsf3	15	0.021864	0.615071	0.771036																	sp|Q62446|FKBP3_MOUSE	Fkbp3	9	0.0200587	0.488398	0.680268
sp|Q9JLI8|SART3_MOUSE	Sart3	18	0.0214112	0.867826	0.932747																	sp|Q8VDP4|CCAR2_MOUSE	Ccar2	18	0.0195497	0.510476	0.692783
sp|Q9QZD9|EIF3I_MOUSE	Eif3i	7	0.0213938	0.801099	0.891869																	sp|P25444|RS2_MOUSE	Rps2	20	0.0191323	0.991125	0.99278
sp|Q9WV55|VAPA_MOUSE	Vapa	10	0.0205527	0.829719	0.909388																	sp|P48432|SOX2_MOUSE	Sox2	4	0.0186219	0.57635	0.7417
sp|P26231|CTNA1_MOUSE	Ctnna1	5	0.0202539	0.931597	0.962444																	sp|P03975|IGEB_MOUSE	Iap	7	0.0163688	0.848555	0.922086
sp|Q62446|FKBP3_MOUSE	Fkbp3	9	0.0200587	0.488398	0.680268																	sp|Q8K3A9|MEPCE_MOUSE	Mepce	4	0.0149492	0.873057	0.933905
sp|Q8VDP4|CCAR2_MOUSE	Ccar2	18	0.0195497	0.510476	0.692783																	sp|Q80WJ7|LYRIC_MOUSE	Mtdh	16	0.0147097	0.952406	0.972439
sp|P25444|RS2_MOUSE	Rps2	20	0.0191323	0.991125	0.99278																	sp|Q99KF1|TMED9_MOUSE	Tmed9	7	0.0130382	0.682105	0.817827
sp|P48432|SOX2_MOUSE	Sox2	4	0.0186219	0.57635	0.7417																	sp|A2RSY6|TRM1L_MOUSE	Trmt1l	4	0.0121644	0.566753	0.732708
sp|P03975|IGEB_MOUSE	Iap	7	0.0163688	0.848555	0.922086																	sp|P62717|RL18A_MOUSE	Rpl18a	19	0.0115929	0.341851	0.558143
sp|Q8K3A9|MEPCE_MOUSE	Mepce	4	0.0149492	0.873057	0.933905																	sp|P31650|S6A11_MOUSE	Slc6a11	5	0.0110615	0.984997	0.992776
sp|Q80WJ7|LYRIC_MOUSE	Mtdh	16	0.0147097	0.952406	0.972439																	sp|Q8VD75|HIP1_MOUSE	Hip1	15	0.00929245	0.803169	0.892834
sp|Q99KF1|TMED9_MOUSE	Tmed9	7	0.0130382	0.682105	0.817827																	sp|Q9ERK4|XPO2_MOUSE	Cse1l	4	0.00778881	0.533695	0.710244
sp|A2RSY6|TRM1L_MOUSE	Trmt1l	4	0.0121644	0.566753	0.732708																	sp|Q8VDM6|HNRL1_MOUSE	Hnrnpul1	23	0.00667342	0.843464	0.919448
sp|P62717|RL18A_MOUSE	Rpl18a	19	0.0115929	0.341851	0.558143																	sp|P17141|ZFP37_MOUSE	Zfp37	10	0.00636051	0.559211	0.728323
sp|P31650|S6A11_MOUSE	Slc6a11	5	0.0110615	0.984997	0.992776																	sp|O09167|RL21_MOUSE	Rpl21	12	0.00621093	0.415732	0.617659
sp|Q8VD75|HIP1_MOUSE	Hip1	15	0.00929245	0.803169	0.892834																	sp|P35980|RL18_MOUSE	Rpl18	10	0.00547697	0.501436	0.686401
sp|Q9ERK4|XPO2_MOUSE	Cse1l	4	0.00778881	0.533695	0.710244																	sp|Q3TXS7|PSMD1_MOUSE	Psmd1	9	0.00509564	0.784443	0.884251
sp|Q8VDM6|HNRL1_MOUSE	Hnrnpul1	23	0.00667342	0.843464	0.919448																	sp|Q62448|IF4G2_MOUSE	Eif4g2	6	0.00301914	0.873396	0.933905
sp|P17141|ZFP37_MOUSE	Zfp37	10	0.00636051	0.559211	0.728323																	sp|P13864|DNMT1_MOUSE	Dnmt1	9	0.00284622	0.451068	0.648298
sp|O09167|RL21_MOUSE	Rpl21	12	0.00621093	0.415732	0.617659																	sp|Q8CFG0|SULF2_MOUSE	Sulf2	11	0.00213492	0.485054	0.676631
sp|P35980|RL18_MOUSE	Rpl18	10	0.00547697	0.501436	0.686401																	sp|Q6NZJ6|IF4G1_MOUSE	Eif4g1	12	-5.11181e-05	0.907184	0.947683
sp|Q3TXS7|PSMD1_MOUSE	Psmd1	9	0.00509564	0.784443	0.884251																	sp|P32067|LA_MOUSE	Ssb	15	-0.00035377	0.38644	0.595567
sp|Q62448|IF4G2_MOUSE	Eif4g2	6	0.00301914	0.873396	0.933905																	sp|Q9R0Q7|TEBP_MOUSE	Ptges3	5	-0.002567	0.874453	0.933905
sp|P13864|DNMT1_MOUSE	Dnmt1	9	0.00284622	0.451068	0.648298																	sp|Q9CX86|ROA0_MOUSE	Hnrnpa0	24	-0.00295112	0.664902	0.801837
sp|Q8CFG0|SULF2_MOUSE	Sulf2	11	0.00213492	0.485054	0.676631																	sp|Q08288|LYAR_MOUSE	Lyar	17	-0.00324545	0.882394	0.9358
sp|Q6NZJ6|IF4G1_MOUSE	Eif4g1	12	-5.11181e-05	0.907184	0.947683																	sp|Q3TDN2|FAF2_MOUSE	Faf2	5	-0.00486342	0.628387	0.778002
sp|P32067|LA_MOUSE	Ssb	15	-0.00035377	0.38644	0.595567																	sp|Q920L1|FADS1_MOUSE	Fads1	10	-0.00571166	0.895279	0.940669
sp|Q9R0Q7|TEBP_MOUSE	Ptges3	5	-0.002567	0.874453	0.933905																	sp|Q9WUQ2|PREB_MOUSE	Preb	7	-0.00608314	0.6953	0.826589
sp|Q9CX86|ROA0_MOUSE	Hnrnpa0	24	-0.00295112	0.664902	0.801837																	sp|O08583|THOC4_MOUSE	Alyref	10	-0.0061712	0.339779	0.557809
sp|Q08288|LYAR_MOUSE	Lyar	17	-0.00324545	0.882394	0.9358																	sp|Q8K284|TF3C1_MOUSE	Gtf3c1	6	-0.00774558	0.64252	0.786485
sp|Q3TDN2|FAF2_MOUSE	Faf2	5	-0.00486342	0.628387	0.778002																	sp|Q9Z1M8|RED_MOUSE	Ik	4	-0.00842034	0.52605	0.706328
sp|Q920L1|FADS1_MOUSE	Fads1	10	-0.00571166	0.895279	0.940669																	sp|O54774|AP3D1_MOUSE	Ap3d1	4	-0.00878451	0.326418	0.542999
sp|Q9WUQ2|PREB_MOUSE	Preb	7	-0.00608314	0.6953	0.826589																	sp|O55128|SAP18_MOUSE	Sap18	10	-0.0110725	0.621417	0.773014
sp|O08583|THOC4_MOUSE	Alyref	10	-0.0061712	0.339779	0.557809																	sp|Q9CQL1|MGN2_MOUSE	Magohb	6	-0.011979	0.433472	0.629022
sp|Q8K284|TF3C1_MOUSE	Gtf3c1	6	-0.00774558	0.64252	0.786485																	sp|Q9D8N0|EF1G_MOUSE	Eef1g	12	-0.0121166	0.585141	0.745524
sp|Q9Z1M8|RED_MOUSE	Ik	4	-0.00842034	0.52605	0.706328																	sp|P55096|ABCD3_MOUSE	Abcd3	22	-0.012394	0.480505	0.672116
sp|O54774|AP3D1_MOUSE	Ap3d1	4	-0.00878451	0.326418	0.542999																	sp|P17427|AP2A2_MOUSE	Ap2a2	5	-0.0125437	0.456898	0.654822
sp|O55128|SAP18_MOUSE	Sap18	10	-0.0110725	0.621417	0.773014																	sp|Q8BTI8|SRRM2_MOUSE	Srrm2	35	-0.0125534	0.812506	0.897564
sp|Q9CQL1|MGN2_MOUSE	Magohb	6	-0.011979	0.433472	0.629022																	sp|Q61768|KINH_MOUSE	Kif5b	8	-0.0164838	0.879341	0.934276
sp|Q9D8N0|EF1G_MOUSE	Eef1g	12	-0.0121166	0.585141	0.745524																	sp|Q91YR7|PRP6_MOUSE	Prpf6	21	-0.0166489	0.778865	0.881876
sp|P55096|ABCD3_MOUSE	Abcd3	22	-0.012394	0.480505	0.672116																	sp|Q9JII5|DAZP1_MOUSE	Dazap1	7	-0.0168995	0.426969	0.625582
sp|P17427|AP2A2_MOUSE	Ap2a2	5	-0.0125437	0.456898	0.654822																	sp|Q6PDQ2|CHD4_MOUSE	Chd4	32	-0.0176164	0.940321	0.96759
sp|Q8BTI8|SRRM2_MOUSE	Srrm2	35	-0.0125534	0.812506	0.897564																	sp|Q6A026|PDS5A_MOUSE	Pds5a	9	-0.0180027	0.982503	0.990973
sp|Q61768|KINH_MOUSE	Kif5b	8	-0.0164838	0.879341	0.934276																	sp|Q6ZWX6|IF2A_MOUSE	Eif2s1	18	-0.0181641	0.465052	0.660863
sp|Q91YR7|PRP6_MOUSE	Prpf6	21	-0.0166489	0.778865	0.881876																	sp|P62196|PRS8_MOUSE	Psmc5	9	-0.0183491	0.543211	0.717468
sp|Q9JII5|DAZP1_MOUSE	Dazap1	7	-0.0168995	0.426969	0.625582																	sp|Q91WM1|STRBP_MOUSE	Strbp	7	-0.0194255	0.81227	0.897564
sp|Q6PDQ2|CHD4_MOUSE	Chd4	32	-0.0176164	0.940321	0.96759																	sp|O08810|U5S1_MOUSE	Eftud2	33	-0.020774	0.507604	0.68991
sp|Q6A026|PDS5A_MOUSE	Pds5a	9	-0.0180027	0.982503	0.990973																	sp|Q9DCL9|PUR6_MOUSE	Paics	8	-0.020835	0.975417	0.984533
sp|Q6ZWX6|IF2A_MOUSE	Eif2s1	18	-0.0181641	0.465052	0.660863																	sp|P63037|DNJA1_MOUSE	Dnaja1	4	-0.0210958	0.966323	0.97958
sp|P62196|PRS8_MOUSE	Psmc5	9	-0.0183491	0.543211	0.717468																	sp|Q6P5D8|SMHD1_MOUSE	Smchd1	13	-0.0257367	0.3396	0.557809
sp|Q91WM1|STRBP_MOUSE	Strbp	7	-0.0194255	0.81227	0.897564																	sp|Q8CCP0|NEMF_MOUSE	Nemf	7	-0.0271856	0.657626	0.797058
sp|O08810|U5S1_MOUSE	Eftud2	33	-0.020774	0.507604	0.68991																	sp|Q8CI51|PDLI5_MOUSE	Pdlim5	8	-0.0283266	0.724188	0.848006
sp|Q9DCL9|PUR6_MOUSE	Paics	8	-0.020835	0.975417	0.984533																	sp|Q9QUI0|RHOA_MOUSE	Rhoa	5	-0.0301031	0.554512	0.724893
sp|P63037|DNJA1_MOUSE	Dnaja1	4	-0.0210958	0.966323	0.97958																	sp|P19096|FAS_MOUSE	Fasn	31	-0.0301486	0.563652	0.730847
sp|Q6P5D8|SMHD1_MOUSE	Smchd1	13	-0.0257367	0.3396	0.557809																	sp|Q8CG47|SMC4_MOUSE	Smc4	12	-0.0303208	0.575448	0.7417
sp|Q8CCP0|NEMF_MOUSE	Nemf	7	-0.0271856	0.657626	0.797058																	sp|Q8C052|MAP1S_MOUSE	Map1s	5	-0.0305361	0.746198	0.862983
sp|Q8CI51|PDLI5_MOUSE	Pdlim5	8	-0.0283266	0.724188	0.848006																	sp|Q9DBG3|AP2B1_MOUSE	Ap2b1	12	-0.0309394	0.87971	0.934276
sp|Q9QUI0|RHOA_MOUSE	Rhoa	5	-0.0301031	0.554512	0.724893																	sp|Q9WUR2|ECI2_MOUSE	Eci2	6	-0.0317012	0.720496	0.8458
sp|P19096|FAS_MOUSE	Fasn	31	-0.0301486	0.563652	0.730847																	sp|Q99JX7|NXF1_MOUSE	Nxf1	16	-0.0356	0.879377	0.934276
sp|Q8CG47|SMC4_MOUSE	Smc4	12	-0.0303208	0.575448	0.7417																	sp|E9Q784|ZC3HD_MOUSE	Zc3h13	9	-0.0363323	0.717268	0.844127
sp|Q8C052|MAP1S_MOUSE	Map1s	5	-0.0305361	0.746198	0.862983																	sp|Q8BG81|PDIP3_MOUSE	Poldip3	18	-0.0363463	0.860399	0.927091
sp|Q9DBG3|AP2B1_MOUSE	Ap2b1	12	-0.0309394	0.87971	0.934276																	sp|Q8R1B4|EIF3C_MOUSE	Eif3c	22	-0.0376377	0.392677	0.599259
sp|Q9WUR2|ECI2_MOUSE	Eci2	6	-0.0317012	0.720496	0.8458																	sp|Q920Q6|MSI2H_MOUSE	Msi2	13	-0.0384449	0.406729	0.61403
sp|Q99JX7|NXF1_MOUSE	Nxf1	16	-0.0356	0.879377	0.934276																	sp|P57776|EF1D_MOUSE	Eef1d	12	-0.0426382	0.846061	0.920116
sp|E9Q784|ZC3HD_MOUSE	Zc3h13	9	-0.0363323	0.717268	0.844127																	sp|O09106|HDAC1_MOUSE	Hdac1	5	-0.043802	0.592582	0.750212
sp|Q8BG81|PDIP3_MOUSE	Poldip3	18	-0.0363463	0.860399	0.927091																	sp|Q3TFD2|PCAT1_MOUSE	Lpcat1	7	-0.0447424	0.943741	0.967868
sp|Q8R1B4|EIF3C_MOUSE	Eif3c	22	-0.0376377	0.392677	0.599259																	sp|P57780|ACTN4_MOUSE	Actn4	8	-0.0460808	0.39033	0.597626
sp|Q920Q6|MSI2H_MOUSE	Msi2	13	-0.0384449	0.406729	0.61403																	sp|Q99L04|DHRS1_MOUSE	Dhrs1	4	-0.0467569	0.658082	0.797058
sp|P57776|EF1D_MOUSE	Eef1d	12	-0.0426382	0.846061	0.920116																	sp|Q7TSC1|PRC2A_MOUSE	Prrc2a	21	-0.0473039	0.608384	0.766031
sp|O09106|HDAC1_MOUSE	Hdac1	5	-0.043802	0.592582	0.750212																	sp|Q9R0N3|SYT11_MOUSE	Syt11	4	-0.0478446	0.798396	0.891869
sp|Q3TFD2|PCAT1_MOUSE	Lpcat1	7	-0.0447424	0.943741	0.967868																	sp|Q8R1V4|TMED4_MOUSE	Tmed4	4	-0.0478763	0.560428	0.729232
sp|P57780|ACTN4_MOUSE	Actn4	8	-0.0460808	0.39033	0.597626																	sp|Q3TDQ1|STT3B_MOUSE	Stt3b	17	-0.0480301	0.828501	0.909388
sp|Q99L04|DHRS1_MOUSE	Dhrs1	4	-0.0467569	0.658082	0.797058																	sp|Q9D6Z1|NOP56_MOUSE	Nop56	18	-0.0482787	0.723092	0.84743
sp|Q7TSC1|PRC2A_MOUSE	Prrc2a	21	-0.0473039	0.608384	0.766031																	sp|Q99JY9|ARP3_MOUSE	Actr3	4	-0.048312	0.310211	0.529127
sp|Q9R0N3|SYT11_MOUSE	Syt11	4	-0.0478446	0.798396	0.891869																	sp|Q03141|MARK3_MOUSE	Mark3	17	-0.0488519	0.963899	0.978535
sp|Q8R1V4|TMED4_MOUSE	Tmed4	4	-0.0478763	0.560428	0.729232																	sp|Q9CZW4|ACSL3_MOUSE	Acsl3	10	-0.0500766	0.726594	0.84891
sp|Q3TDQ1|STT3B_MOUSE	Stt3b	17	-0.0480301	0.828501	0.909388																	sp|P67984|RL22_MOUSE	Rpl22	10	-0.0512751	0.921322	0.956904
sp|Q9D6Z1|NOP56_MOUSE	Nop56	18	-0.0482787	0.723092	0.84743																	sp|Q8BP67|RL24_MOUSE	Rpl24	12	-0.0530421	0.537186	0.712804
sp|Q99JY9|ARP3_MOUSE	Actr3	4	-0.048312	0.310211	0.529127																	sp|P62821|RAB1A_MOUSE	Rab1A	4	-0.0539619	0.591947	0.750212
sp|Q03141|MARK3_MOUSE	Mark3	17	-0.0488519	0.963899	0.978535																	sp|P14733|LMNB1_MOUSE	Lmnb1	35	-0.0547583	0.656057	0.797052
sp|Q9CZW4|ACSL3_MOUSE	Acsl3	10	-0.0500766	0.726594	0.84891																	sp|Q8C181|MBNL2_MOUSE	Mbnl2	4	-0.0575936	0.295708	0.515211
sp|P67984|RL22_MOUSE	Rpl22	10	-0.0512751	0.921322	0.956904																	sp|Q66GT5|PTPM1_MOUSE	Ptpmt1	4	-0.0611386	0.641844	0.786343
sp|Q8BP67|RL24_MOUSE	Rpl24	12	-0.0530421	0.537186	0.712804																	sp|Q61655|DD19A_MOUSE	Ddx19a	4	-0.0615984	0.956799	0.973439
sp|P62821|RAB1A_MOUSE	Rab1A	4	-0.0539619	0.591947	0.750212																	sp|Q8BRT1|CLAP2_MOUSE	Clasp2	24	-0.064747	0.725242	0.848533
sp|P14733|LMNB1_MOUSE	Lmnb1	35	-0.0547583	0.656057	0.797052																	sp|Q9CSH3|RRP44_MOUSE	Dis3	5	-0.0663481	0.655329	0.797052
sp|Q8C181|MBNL2_MOUSE	Mbnl2	4	-0.0575936	0.295708	0.515211																	sp|Q9Z315|SNUT1_MOUSE	Sart1	14	-0.0672584	0.805766	0.895012
sp|Q66GT5|PTPM1_MOUSE	Ptpmt1	4	-0.0611386	0.641844	0.786343																	sp|Q60668|HNRPD_MOUSE	Hnrnpd	26	-0.0688684	0.304723	0.522384
sp|Q61655|DD19A_MOUSE	Ddx19a	4	-0.0615984	0.956799	0.973439																	sp|O35691|PININ_MOUSE	Pnn	11	-0.0696133	0.900263	0.942557
sp|Q8BRT1|CLAP2_MOUSE	Clasp2	24	-0.064747	0.725242	0.848533																	sp|P39054|DYN2_MOUSE	Dnm2	8	-0.0700796	0.298823	0.517512
sp|Q9CSH3|RRP44_MOUSE	Dis3	5	-0.0663481	0.655329	0.797052																	sp|Q6A068|CDC5L_MOUSE	Cdc5l	22	-0.0724563	0.52878	0.707055
sp|Q9Z315|SNUT1_MOUSE	Sart1	14	-0.0672584	0.805766	0.895012																	sp|P60843|IF4A1_MOUSE	Eif4a1	24	-0.075273	0.813283	0.897564
sp|Q60668|HNRPD_MOUSE	Hnrnpd	26	-0.0688684	0.304723	0.522384																	sp|P37040|NCPR_MOUSE	Por	13	-0.0760194	0.529474	0.707308
sp|O35691|PININ_MOUSE	Pnn	11	-0.0696133	0.900263	0.942557																	sp|Q99MJ9|DDX50_MOUSE	Ddx50	15	-0.0761939	0.463148	0.659493
sp|P39054|DYN2_MOUSE	Dnm2	8	-0.0700796	0.298823	0.517512																	sp|Q9CY57|CHTOP_MOUSE	Chtop	9	-0.0765818	0.35575	0.565412
sp|Q6A068|CDC5L_MOUSE	Cdc5l	22	-0.0724563	0.52878	0.707055																	sp|Q9Z1Q9|SYVC_MOUSE	Vars	19	-0.076898	0.74585	0.862983
sp|P60843|IF4A1_MOUSE	Eif4a1	24	-0.075273	0.813283	0.897564																	sp|Q8K2F8|LS14A_MOUSE	Lsm14a	12	-0.0772187	0.858223	0.927091
sp|P37040|NCPR_MOUSE	Por	13	-0.0760194	0.529474	0.707308																	sp|Q6P5H2|NEST_MOUSE	Nes	8	-0.0778071	0.296654	0.515473
sp|Q99MJ9|DDX50_MOUSE	Ddx50	15	-0.0761939	0.463148	0.659493																	sp|Q8R0X7|SGPL1_MOUSE	Sgpl1	24	-0.0794226	0.656262	0.797052
sp|Q9CY57|CHTOP_MOUSE	Chtop	9	-0.0765818	0.35575	0.565412																	sp|P26638|SYSC_MOUSE	Sars	5	-0.0795434	0.312756	0.530671
sp|Q9Z1Q9|SYVC_MOUSE	Vars	19	-0.076898	0.74585	0.862983																	sp|P60122|RUVB1_MOUSE	Ruvbl1	6	-0.079882	0.776032	0.879378
sp|Q8K2F8|LS14A_MOUSE	Lsm14a	12	-0.0772187	0.858223	0.927091																	sp|Q7TMB8|CYFP1_MOUSE	Cyfip1	7	-0.0802853	0.874478	0.933905
sp|Q6P5H2|NEST_MOUSE	Nes	8	-0.0778071	0.296654	0.515473																	sp|O35286|DHX15_MOUSE	Dhx15	35	-0.0812128	0.479044	0.672116
sp|Q8R0X7|SGPL1_MOUSE	Sgpl1	24	-0.0794226	0.656262	0.797052																	sp|Q9JMH9|MY18A_MOUSE	Myo18a	10	-0.083369	0.550624	0.721401
sp|P26638|SYSC_MOUSE	Sars	5	-0.0795434	0.312756	0.530671																	sp|O55131|SEPT7_MOUSE	Septin07	21	-0.0852943	0.383151	0.592449
sp|P60122|RUVB1_MOUSE	Ruvbl1	6	-0.079882	0.776032	0.879378																	sp|O88532|ZFR_MOUSE	Zfr	24	-0.0860315	0.442883	0.63972
sp|Q7TMB8|CYFP1_MOUSE	Cyfip1	7	-0.0802853	0.874478	0.933905																	sp|Q9JIK5|DDX21_MOUSE	Ddx21	44	-0.0862822	0.662159	0.799373
sp|O35286|DHX15_MOUSE	Dhx15	35	-0.0812128	0.479044	0.672116																	sp|Q6ZQ38|CAND1_MOUSE	Cand1	4	-0.0864141	0.906972	0.947683
sp|Q9JMH9|MY18A_MOUSE	Myo18a	10	-0.083369	0.550624	0.721401																	sp|Q4VA53|PDS5B_MOUSE	Pds5b	22	-0.0956012	0.210325	0.421851
sp|O55131|SEPT7_MOUSE	Septin07	21	-0.0852943	0.383151	0.592449																	sp|Q3U1G5|I20L2_MOUSE	Isg20l2	5	-0.0967294	0.433684	0.629022
sp|O88532|ZFR_MOUSE	Zfr	24	-0.0860315	0.442883	0.63972																	sp|Q0P678|ZCH18_MOUSE	Zc3h18	5	-0.0971605	0.507445	0.68991
sp|Q9JIK5|DDX21_MOUSE	Ddx21	44	-0.0862822	0.662159	0.799373																	sp|Q99MR6|SRRT_MOUSE	Srrt	7	-0.0974402	0.84095	0.91911
sp|Q6ZQ38|CAND1_MOUSE	Cand1	4	-0.0864141	0.906972	0.947683																	sp|Q8VDD5|MYH9_MOUSE	Myh9	92	-0.0999165	0.433105	0.629022
sp|Q4VA53|PDS5B_MOUSE	Pds5b	22	-0.0956012	0.210325	0.421851																	sp|Q6P4T2|U520_MOUSE	Snrnp200	40	-0.10111	0.430153	0.628445
sp|Q3U1G5|I20L2_MOUSE	Isg20l2	5	-0.0967294	0.433684	0.629022																	sp|Q8CIE6|COPA_MOUSE	Copa	37	-0.101692	0.226143	0.441621
sp|Q0P678|ZCH18_MOUSE	Zc3h18	5	-0.0971605	0.507445	0.68991																	sp|Q8K1M6|DNM1L_MOUSE	Dnm1l	5	-0.10441	0.79742	0.891869
sp|Q99MR6|SRRT_MOUSE	Srrt	7	-0.0974402	0.84095	0.91911																	sp|P84091|AP2M1_MOUSE	Ap2m1	10	-0.105895	0.326975	0.543282
sp|Q8VDD5|MYH9_MOUSE	Myh9	92	-0.0999165	0.433105	0.629022																	sp|Q9ESX5|DKC1_MOUSE	Dkc1	9	-0.10596	0.381304	0.592179
sp|Q6P4T2|U520_MOUSE	Snrnp200	40	-0.10111	0.430153	0.628445																	sp|P35279|RAB6A_MOUSE	Rab6a	11	-0.106338	0.890695	0.939546
sp|Q8CIE6|COPA_MOUSE	Copa	37	-0.101692	0.226143	0.441621																	sp|Q9DAW9|CNN3_MOUSE	Cnn3	9	-0.107288	0.272943	0.490042
sp|Q8K1M6|DNM1L_MOUSE	Dnm1l	5	-0.10441	0.79742	0.891869																	sp|P23116|EIF3A_MOUSE	Eif3a	49	-0.10926	0.189401	0.402684
sp|P84091|AP2M1_MOUSE	Ap2m1	10	-0.105895	0.326975	0.543282																	sp|Q8CCJ4|AMER2_MOUSE	Amer2	5	-0.110567	0.245156	0.462013
sp|Q9ESX5|DKC1_MOUSE	Dkc1	9	-0.10596	0.381304	0.592179																	sp|Q91Z49|UIF_MOUSE	Fyttd1	5	-0.110831	0.234345	0.449481
sp|P35279|RAB6A_MOUSE	Rab6a	11	-0.106338	0.890695	0.939546																	sp|Q62261|SPTB2_MOUSE	Sptbn1	15	-0.111814	0.658359	0.797058
sp|Q9DAW9|CNN3_MOUSE	Cnn3	9	-0.107288	0.272943	0.490042																	sp|Q9DBN5|LONP2_MOUSE	Lonp2	5	-0.113937	0.315061	0.530671
sp|P23116|EIF3A_MOUSE	Eif3a	49	-0.10926	0.189401	0.402684																	sp|Q9JHU4|DYHC1_MOUSE	Dync1h1	102	-0.114804	0.224616	0.441621
sp|Q8CCJ4|AMER2_MOUSE	Amer2	5	-0.110567	0.245156	0.462013																	sp|P62827|RAN_MOUSE	Ran	16	-0.115153	0.708526	0.835942
sp|Q91Z49|UIF_MOUSE	Fyttd1	5	-0.110831	0.234345	0.449481																	sp|Q9R099|TBL2_MOUSE	Tbl2	9	-0.116006	0.436837	0.63294
sp|Q62261|SPTB2_MOUSE	Sptbn1	15	-0.111814	0.658359	0.797058																	sp|P54276|MSH6_MOUSE	Msh6	5	-0.118694	0.187462	0.402276
sp|Q9DBN5|LONP2_MOUSE	Lonp2	5	-0.113937	0.315061	0.530671																	sp|A2AR02|PPIG_MOUSE	Ppig	9	-0.11886	0.379036	0.589331
sp|Q9JHU4|DYHC1_MOUSE	Dync1h1	102	-0.114804	0.224616	0.441621																	sp|Q64511|TOP2B_MOUSE	Top2b	17	-0.122514	0.41166	0.616173
sp|P62827|RAN_MOUSE	Ran	16	-0.115153	0.708526	0.835942																	sp|Q9QYA2|TOM40_MOUSE	Tomm40	7	-0.124012	0.476235	0.671319
sp|Q9R099|TBL2_MOUSE	Tbl2	9	-0.116006	0.436837	0.63294																	sp|O08756|HCD2_MOUSE	Hsd17b10	9	-0.124226	0.537649	0.712804
sp|P54276|MSH6_MOUSE	Msh6	5	-0.118694	0.187462	0.402276																	sp|Q922R8|PDIA6_MOUSE	Pdia6	7	-0.125301	0.940611	0.96759
sp|A2AR02|PPIG_MOUSE	Ppig	9	-0.11886	0.379036	0.589331																	sp|Q9EPU0|RENT1_MOUSE	Upf1	12	-0.125362	0.445509	0.642192
sp|Q64511|TOP2B_MOUSE	Top2b	17	-0.122514	0.41166	0.616173																	sp|Q9R0H0|ACOX1_MOUSE	Acox1	17	-0.126435	0.255331	0.474394
sp|Q9QYA2|TOM40_MOUSE	Tomm40	7	-0.124012	0.476235	0.671319																	sp|Q8C0C7|SYFA_MOUSE	Farsa	8	-0.126801	0.914575	0.95251
sp|O08756|HCD2_MOUSE	Hsd17b10	9	-0.124226	0.537649	0.712804																	sp|P16546|SPTN1_MOUSE	Sptan1	4	-0.127642	0.949046	0.971181
sp|Q922R8|PDIA6_MOUSE	Pdia6	7	-0.125301	0.940611	0.96759																	sp|P09411|PGK1_MOUSE	Pgk1	6	-0.130513	0.649035	0.793077
sp|Q9EPU0|RENT1_MOUSE	Upf1	12	-0.125362	0.445509	0.642192																	sp|Q8C1B7|SEP11_MOUSE	Septin11	12	-0.131361	0.142619	0.34511
[truncated: 530 more rows]

## Sheet: NFIB 3'UTR vs 5'UTR raw
NFIB 3'UTR vs 5'UTR
[truncated: 1,219 more rows]

## Sheet: NFIB 3'UTR vs 5'UTR curated
NFIB 3'UTR vs 5'UTR (previously enriched and minus bead binding proteins)
[truncated: 140 more rows]

[truncated: 1 more sheets: Bead binding and RBPs]
