# Supplementary material for: SAFB regulates hippocampal stem cell fate by targeting Drosha to destabilize Nfib mRNA
Source: eLife. 2024 May 9;13:e74940. doi: 10.7554/eLife.74940 (PMC11149935; doi:10.7554/eLife.74940)
Supplement: Supplementary file 3. [file elife-74940-supp3.xlsx]

## Sheet: raw data
IP					PD2 3p					PD2 5p					PD3 3p (minus sticky)					PD3 5p (minus sticky)					PD3 3p vs 5p (minus sticky)					Gerstberger et al.		Huang et al.
Name	Peptide count	Log2	q value	p value	Name	Peptide count	Log2	q value	p value	Name	Peptide count	Log2	q value	p value	Name	Peptide count	Log2	q value	p value	Name	Peptide count	Log2	q value	p value	Name	Peptide count	Log2	q value	p value	RPS11		Name
Dgcr8	30	7.27717	7.86925e-19	1.23253e-20	Stag2	2	8.58269	0.774324	0.719082	Stag2	2	9.15322	0.328544	0.21423	Trim9	3	2.78636	0.0025988	1.12564e-05	Rbm25	10	1.48722	0.0562375	0.00392541	Safb	42	1.94417	0.006204	1.98999e-05	ERAL1		RBM47
Khdrbs1	8	6.28238	2.6495e-13	1.11726e-14	Snu13	2	5.51213	0.0177962	0.00449746	Snu13	2	6.06794	0.0120761	0.00235097	Eri3	3	2.17637	0.106786	0.00336691	Pura	9	1.25651	0.0268799	0.00108283	Sf1	15	1.78437	0.0113333	0.000101314	DDX27		UBA6
Pabpn1	4	5.40882	8.05559e-11	6.21154e-12	Elob	2	4.84272	0.00379845	0.000275387	Elob	2	5.86589	0.00301585	0.000138576	Mrpl34	2	2.06891	0.185416	0.0110042	Atp2b1	3	1.22016	0.113076	0.0158503	Pabpn1	15	1.6588	0.0121158	0.000188998	DEK		MEX3A
Prpf6	9	4.86528	7.48887e-09	8.66182e-10	Sltm	4	4.64683	0.00282502	0.000127851	Sltm	4	3.6732	0.0078141	0.00104929	Dad1	2	1.74012	0.0913109	0.00220339	Ppp1r12a	3	1.20885	0.191089	0.0513715	Qki	22	1.04493	0.0121158	0.00018717	PSMA6		FAM92A
Khsrp	13	4.80118	1.10641e-09	1.10641e-10	Znf346	2	4.50877	0.00271157	0.000112382	Znf346	2	4.1923	0.00237846	8.62802e-05	Ddx27	4	1.73481	0.272641	0.0294604	Tma7	6	1.07183	0.148209	0.0279435	Khdrbs1	19	2.06389	0.0521102	0.00260037	TRIM56		ZC3H12D
Bub3	5	4.66669	5.54203e-08	7.27808e-09	Nop2	2	4.43356	0.0322546	0.0110168	Nop2	2	1.41795	0.680161	0.583966	Strbp	4	1.64394	0.46839	0.14541	Cbx8	2	1.06816	0.0811304	0.00722315	Hnrnpu	66	0.630007	0.074655	0.00514862	TRIM71		CXorf23
Safb	13	4.43998	7.21015e-09	8.07884e-10	Nars	3	4.38598	0.000870206	1.89404e-05	Nars	3	5.76929	0.00188868	1.14189e-05	Parp12	3	1.51248	0.274858	0.0308215	Hnrnpa2b1	38	1.06126	0.00752466	0.000150064	Ddx5	46	0.462101	0.166197	0.0274266	UPF2		TARSL2
Qki	5	4.34938	1.4252e-06	2.42113e-07	Phf6	4	4.27351	0.0048836	0.000501699	Phf6	4	3.25666	0.0141997	0.00302194	Cpsf1	3	1.45935	0.0297772	0.000380405	Vcp	4	1.02705	0.0151569	0.000453412	Dhx9	79	-0.464261	0.369065	0.140387	FARS2		SMCO3
Dhx9	16	4.18618	8.19104e-07	1.30267e-07	Dnajc2	5	4.11413	0.00245599	8.90928e-05	Dnajc2	5	2.04923	0.0412992	0.0142425	D8Ertd738e	5	1.44264	0.242368	0.0232219	Purb	13	1.02072	0.0184216	0.000577316	Tardbp	13	-0.191028	0.472795	0.237174	FDXACB1		MEIOC
Sf1	7	3.98392	7.40898e-07	1.15613e-07	Frg1	2	4.07358	0.00379845	0.000272919	Frg1	2	0.0939425	0.882129	0.823463	Nhp2	3	1.40894	0.113889	0.0041223	Edf1	5	0.993286	0.0725963	0.00588718	Prpf6	17	0.367777	0.476441	0.240177	ALKBH8		TYW5
Sart1	15	3.93211	7.52162e-07	1.18715e-07	Eloa	2	4.00235	0.0440217	0.0170338	Eloa	2	4.96688	0.0410865	0.0140598	Znf346	2	1.39685	0.209449	0.0182755	Nipsnap1	3	0.985833	0.155618	0.031035	Ddx17	20	0.143739	0.501025	0.262595	ZNF579		KIAA0922
Tardbp	2	3.83398	3.73833e-06	7.02625e-07	Hspa14	3	3.9631	0.0284629	0.00867309	Hspa14	3	2.19784	0.292179	0.182122	Scp2	2	1.38222	0.608459	0.311032	Ncl	58	0.981187	0.00868742	0.000185629	Hnrnpl	45	2.45707	0.00520982	4.27736e-06	POLR2B		GTPBP10
Ddx17	8	3.20307	0.00011307	3.39209e-05	Fen1	4	3.94265	0.0217468	0.00591649	Fen1	4	1.98212	0.091474	0.0412573	Hnrnpab	29	1.29472	0.209449	0.0168736	Ndufa5	4	0.842402	0.0964839	0.0106048	Sfpq	53	2.17531	0.006204	2.67201e-05	WDR12		MBLAC1
Fus	3	3.18441	0.00133578	0.00069042	Cdv3	2	3.90905	0.409584	0.31796	Cdv3	2	2.19254	0.825565	0.751693	Rbmxl1	56	1.2242	0.126141	0.00519247	Rpl19	15	0.841417	0.0832923	0.00800888	Nono	47	2.00082	0.006204	3.05616e-05	RPF1		CNOT1
Hnrnpu	25	3.08213	0.000257056	8.91953e-05	Snrpd1	4	3.72495	0.049272	0.0196611	Snrpd1	4	5.84777	0.0542864	0.0207431	Mex3b	2	1.22353	0.0287208	0.000346525	Syncrip	42	0.83983	0.00881662	0.000199676	Rbmxl1	56	2.03134	0.0161295	0.000264852	MRPS34		BDP1
Ddx5	25	2.93638	0.000327252	0.000119861	Map1a	2	3.69388	0.0322546	0.0109724	Map1a	2	0.643103	0.860664	0.798222	Ilf2	21	1.1933	0.168613	0.0085579	Fip1l1	2	0.836071	0.109372	0.0143197	Hnrnpa2b1	45	1.52734	0.0170191	0.000293433	UBTF		DPPA5
Trim9	3	2.16655	0.00739801	0.0058471	Rpl7l1	3	3.69163	0.0640743	0.0285119	Rpl7l1	3	2.50231	0.264068	0.161889	Rbmx	11	1.11734	0.0912887	0.00207327	Khdrbs3	2	0.831384	0.0256691	0.000987273	Srsf10	16	1.38073	0.0191747	0.000440798	CDC5L		RBMY1B
Mex3c	8	8.06185	1.95914e-21	1.1802e-23	Rpl22l1	2	3.68308	0.00626533	0.000773973	Rpl22l1	2	5.44352	0.0116622	0.00213791	Mrps23	4	1.09735	0.202488	0.0140108	Hnrnpa1	32	0.813856	0.021386	0.000709685	Hnrnpa0	25	1.17818	0.0191747	0.000439666	DAZAP1		PABPN1L
Tbc1d10a	2	8.05141	8.88152e-16	1.7121e-17	Nmt1	2	3.67052	0.00282502	0.000140055	Nmt1	2	4.40352	0.00237846	6.23497e-05	Tbrg4	8	1.06844	0.168613	0.00921449	Sdc4	2	0.812958	0.0716345	0.00552255	Hnrnpa3	41	1.14085	0.0191747	0.00041779	MSI1		RBMY1E
Diaph1	3	7.97986	5.28392e-24	2.54647e-26	Hist1h1e	3	3.63086	0.0137669	0.00291318	Hist1h1e	3	1.83688	0.0430624	0.0153608	Zc3h11a	11	1.06523	0.204207	0.0145538	Hmgb3	6	0.795839	0.0173345	0.000530901	Fxr1	33	0.900876	0.0270306	0.000732356	MSI2		TBC1D3F
Sall2	8	7.83958	1.90012e-20	1.60251e-22	Pdlim5	2	3.61438	0.0068458	0.000960234	Pdlim5	2	3.06797	0.0173367	0.00412309	Mrpl33	2	1.03719	0.421786	0.112855	Hnrnpa3	36	0.783169	0.00891831	0.000209618	Hnrnpdl	19	1.51725	0.034185	0.000996095	TARDBP		RBFOX3
Sf3a2	2	7.27659	2.30118e-20	2.218e-22	Ftsj3	2	3.59633	0.0122767	0.00234548	Ftsj3	2	2.74323	0.0483659	0.0177858	Mp68	2	1.03513	0.103701	0.00264956	Cox4i1	6	0.772994	0.168195	0.0393156	Ncoa5	15	1.68137	0.0359391	0.00121318	TRIT1		NEMP2
Naxd	2	7.23488	1.36903e-19	1.64943e-21	Wdr6	5	3.56982	0.0164371	0.00399499	Wdr6	5	2.89775	0.0268374	0.00795061	Ilf3	47	1.03012	0.168613	0.00917484	Zmpste24	4	0.771537	0.489902	0.272168	Pspc1	18	1.06295	0.0359391	0.00119569	MRPL36		OOEP
Ppie	2	7.09792	2.76771e-20	3.00113e-22	Kif5b	2	3.45273	0.143577	0.0848965	Kif5b	2	2.4727	0.402342	0.283634	Atrx	6	1.02539	0.425538	0.116849	Atp5e	4	0.766903	0.11953	0.0186447	Fxr2	15	0.809656	0.0359391	0.00110016	KPNB1		FBLL1
Cbr3	19	6.90984	5.79984e-19	8.38531e-21	Rcc2	7	3.38162	0.0283532	0.00846825	Rcc2	7	4.42851	0.00974329	0.00160153	Tarbp2	4	1.00762	0.372452	0.079353	Ndufa13	4	0.760328	0.113216	0.0164501	Hnrnpa1	39	0.797797	0.0359391	0.00131277	ZNFX1		EPOP
Ctnna1	22	6.87791	1.1886e-15	2.43449e-17	Rpl17	9	3.3308	0.00271157	0.00011201	Rpl17	9	4.61853	0.00206196	3.66377e-05	Afg3l2	4	1.00098	0.397875	0.0921627	Larp7	2	0.756425	0.99278	0.987584	Caprin1	19	0.948814	0.0428721	0.00166092	SNRNP27		WTIP
Sugp1	2	6.75657	1.00147e-20	7.23951e-23	Snrnp40	3	3.30848	0.0225138	0.00620029	Snrnp40	3	3.75595	0.0104699	0.00182122	Lsm3	3	0.985202	0.532582	0.192676	Rps28	6	0.753001	0.00997756	0.000255835	Rbm15b	9	0.853855	0.0445743	0.00186641	RBMS2		RP1BL
Hmbox1	2	6.71848	4.18112e-18	7.05249e-20	Sfpq	35	3.27383	0.00294216	0.00014942	Sfpq	35	3.64167	0.00237846	8.12043e-05	Thoc1	3	0.975955	0.319838	0.0472863	Rps12	5	0.7448	0.186688	0.0478974	Rpl22	10	-0.611832	0.0521102	0.00257812	RBMS1		RGPD3
Sall3	6	6.68104	3.81046e-15	9.18182e-17	Pspc1	7	3.25823	0.00500402	0.000543258	Pspc1	7	2.71663	0.00952253	0.00154295	Prrc2a	22	0.971629	0.209449	0.0169606	Ybx3	7	0.74001	0.0469602	0.0027505	Nxf1	22	0.704891	0.0538502	0.00291799	RBMS3		CPSF4L
Snrpa1	8	6.65989	1.6341e-14	4.7251e-16	Gtf2i	2	3.24083	0.20972	0.136179	Gtf2i	2	0.365399	0.984723	0.97996	Ncoa5	16	0.963584	0.264287	0.0270482	Hmgb2	13	0.73923	0.0380539	0.00200569	Snrpd3	5	0.724114	0.059141	0.00325324	LARS2		EIF4E1B
Sf3a3	7	6.64442	1.866e-14	5.62048e-16	Mex3b	3	3.22887	0.00850086	0.00139797	Mex3b	3	0.776356	0.399509	0.281154	Nop16	5	0.935073	0.414828	0.100737	Rars2	3	0.737567	0.00881662	0.000200949	Sltm	29	0.980332	0.0603091	0.00336701	KIAA0020		SRRM3
Sf3a1	19	6.49908	5.54581e-15	1.40316e-16	Tbl3	2	3.19007	0.636274	0.547026	Tbl3	2	2.70124	0.806608	0.726342	Khdrbs3	12	0.934054	0.254401	0.0245554	Supt6h	2	0.731255	0.0725963	0.0061014	Strap	10	1.32612	0.063322	0.00359724	RBFOX1		NCBP2L
Sf3b3	11	6.44031	2.66682e-14	8.6752e-16	Pabpn1	8	3.12965	0.00618583	0.000751047	Pabpn1	8	2.49769	0.0116622	0.00212704	Poldip3	22	0.92593	0.372969	0.0799408	Ampd3	5	0.728668	0.250615	0.0828242	Fmr1	19	0.796289	0.0646097	0.00382987	RBFOX2		LRRIQ3
Phf5a	4	6.43963	1.27329e-15	2.76135e-17	Fkbp3	5	3.05116	0.00615531	0.000736851	Fkbp3	5	4.32402	0.00237846	8.0803e-05	Znf385a	7	0.922974	0.560159	0.229684	Larp4	2	0.727993	0.0684688	0.0051693	Hp1bp3	36	0.686996	0.0653005	0.00396735	RBFOX3		SRRM4
Ccdc12	4	6.40364	5.85663e-14	2.04629e-15	Hist1h1b	5	3.03934	0.0307623	0.00974575	Hist1h1b	5	1.92059	0.0852374	0.0378339	Eef1b	5	0.913208	0.349073	0.0585038	Tor1aip1	4	0.725533	0.12273	0.019802	Hmgb1	12	-0.724798	0.0709759	0.00442871	CWF19L1		ERI2
Rbm17	10	6.28357	3.81046e-15	9.0056e-17	Safb2	2	2.96577	0.145178	0.0863695	Safb2	2	2.83223	0.0972139	0.0450438	Hnrnpdl	23	0.913031	0.209449	0.0166234	Usmg5	3	0.723805	0.103308	0.0122881	Rps3a	37	-0.589804	0.0716407	0.00485157	CWF19L2		DDX11L8
Prpf3	6	6.2308	5.12812e-13	2.28603e-14	Psip1	5	2.93517	0.00335906	0.000193351	Psip1	5	-0.303173	0.93048	0.885475	Hnrnpd	36	0.898728	0.168613	0.00909953	Ewsr1	4	0.723452	0.0787151	0.00687601	Fam98a	6	1.30213	0.090428	0.00803821	ZC3H15		ZNF724
Eftud2	11	6.09014	1.41e-12	7.30483e-14	Spon1	5	2.9131	0.00458892	0.000438362	Spon1	5	3.64147	0.00364138	0.000237769	Syncrip	52	0.897933	0.209449	0.0185042	Rer1	2	0.721584	0.226846	0.0693583	Rpl31	10	-0.612797	0.0967198	0.009132	LONP1		SNRPGP15
Snrpb2	2	6.04017	2.73729e-14	9.23423e-16	Ckap5	6	2.91127	0.00296531	0.000157767	Ckap5	6	2.81798	0.0054547	0.000463294	Zfr	31	0.889962	0.269491	0.0283128	Hdgf	3	0.720038	0.0908348	0.0093736	Eefsec	4	-0.835287	0.0986936	0.00964248	DBR1		KIAA1324L
Prpf19	8	6.02831	1.82209e-13	7.24445e-15	Nono	33	2.90199	0.00379845	0.000248823	Nono	33	2.92661	0.00348925	0.000198301	Ppib	2	0.881084	0.560159	0.224481	Wdr6	3	0.710076	0.0222485	0.00080817	Nop56	18	0.557934	0.100236	0.0100981	RRP15		MIF4GD
Fyttd1	10	5.96121	3.78603e-12	2.26029e-13	Rpl28	2	2.86162	0.00282502	0.00013455	Rpl28	2	0.435243	0.417405	0.2993	Tma7	2	0.872073	0.209449	0.0158813	Ndufa8	9	0.708012	0.113076	0.0154687	Syncrip	52	0.797436	0.101764	0.0105273	L1TD1		HMGB1P1
Cdh4	2	5.9535	7.20946e-12	4.69049e-13	Hist1h1a	6	2.85627	0.0048836	0.000501942	Hist1h1a	6	2.88284	0.00829097	0.00120063	Khdrbs1	20	0.8705	0.355164	0.0645294	Hmgn1	8	0.696364	0.0544865	0.00360915	Fen1	6	-0.608449	0.108286	0.0118243	NMD3		HNRNPCL2
Mmtag2	2	5.94262	1.27092e-12	6.43115e-14	Rbmxl1	18	2.84074	0.00363498	0.000224164	Rbmxl1	18	1.84853	0.0962997	0.0441325	Gtf2b	3	0.864035	0.314955	0.0435162	Ndufs5	6	0.692697	0.177441	0.0436018	Cdc5l	25	0.488681	0.109582	0.0123871	SRSF10		TDRD15
Mta1	4	5.91406	1.91475e-14	5.99802e-16	Mapre1	2	2.82246	0.0117574	0.00217519	Mapre1	2	4.63951	0.00346082	0.000175162	Toe1	2	0.86308	0.771438	0.558197	Ndufv1	20	0.689254	0.109372	0.0143337	Snrpd2	10	0.559263	0.118892	0.0146914	SRSF12		EIF3CL
Clint1	4	5.90698	7.27947e-13	3.42048e-14	Hnrnpl	24	2.7998	0.00713266	0.00103497	Hnrnpl	24	0.932498	0.12782	0.0653782	Nudt21	9	0.858031	0.298274	0.0383887	Gbas	10	0.683596	0.0812064	0.00728775	G3bp2	17	0.46651	0.120633	0.0150543	SRSF2		HNRNPCL3
Sf3b5	2	5.90513	3.00906e-13	1.30513e-14	Rars	3	2.75191	0.00282502	0.000137175	Rars	3	0.417603	0.674071	0.575446	Pnpt1	2	0.85161	0.214341	0.019776	Snd1	44	0.67744	0.188112	0.0491718	G3bp1	15	0.549821	0.122959	0.0155465	SRSF8		PATL2
Cdc40	3	5.88321	4.0151e-12	2.46711e-13	Zc3h15	6	2.70139	0.00758072	0.00114582	Zc3h15	6	3.40306	0.0071531	0.000932149	Prrc2c	29	0.848752	0.288626	0.0350051	Cox6c	7	0.671305	0.134403	0.0235164	Prpf19	19	0.457943	0.122959	0.0155458	RSL1D1		AKR1B15
Cwc15	5	5.85013	9.58294e-14	3.57917e-15	Qki	14	2.69729	0.00409293	0.000350865	Qki	14	1.99935	0.0166332	0.00376107	Eif2ak2	12	0.845696	0.414828	0.101513	Gnl3	4	0.670737	0.0380539	0.00198508	Eef1a1	36	-0.425778	0.142152	0.0197239	DAP3		DNASE2
Prpf4	5	5.81305	4.45469e-12	2.79089e-13	Prkra	4	2.66758	0.00379845	0.000258505	Prkra	4	3.92293	0.00237846	7.70296e-05	Igf2bp3	4	0.833652	0.264287	0.0269198	Atxn2	2	0.666155	0.399133	0.185637	Alyref	15	0.471003	0.145109	0.0207596	NARS2		KIF2A
Sf3b4	2	5.7758	5.9122e-15	1.56709e-16	Grwd1	2	2.6472	0.00386003	0.000294053	Grwd1	2	4.34892	0.00206196	4.17971e-05	Dhx9	70	0.826227	0.209449	0.016026	Chtf8	2	0.665598	0.0469602	0.00277614	Zmat3	6	0.856837	0.150415	0.0230768	RBM25		DDX39A
Snrnp40	7	5.74091	8.77547e-15	2.43176e-16	Eif2s2	4	2.61403	0.00398212	0.000322614	Eif2s2	4	3.55234	0.00261542	0.000104364	Pabpc1	30	0.812036	0.13899	0.00655703	Impdh2	4	0.663481	0.156899	0.0319674	Drg1	10	0.538128	0.153547	0.0239523	POLR2E		GTPBP1
Zc3h14	13	5.71628	2.51136e-13	1.02875e-14	Smu1	2	2.60068	0.0546582	0.0228018	Smu1	2	0.584454	0.407531	0.289263	Wdr6	3	0.805102	0.11354	0.00402911	Nudt21	6	0.662519	0.138777	0.0248867	Hnrnpll	22	0.448957	0.168348	0.0285446	TOE1		PSMD12
Dhx15	13	5.70536	3.07238e-11	2.221e-12	Dkc1	2	2.58502	0.017939	0.00462033	Dkc1	2	3.95503	0.0054547	0.000453911	Sltm	25	0.801746	0.349073	0.0598615	Serbp1	17	0.655263	0.202298	0.0574907	Snrpd1	4	0.527752	0.169002	0.0294628	TSFM		CBX4
Ccar2	2	5.69507	1.00411e-11	6.70695e-13	Iars	4	2.5554	0.0133489	0.00277896	Iars	4	3.88333	0.00548226	0.000481438	Bclaf1	58	0.792405	0.296082	0.0376144	Mtatp8	2	0.647229	0.253326	0.0844419	Fbl	14	0.352374	0.169293	0.0307347	TPR		PGRMC1
Plrg1	4	5.67146	3.78603e-12	2.28074e-13	Drg1	7	2.55485	0.0064192	0.000861119	Drg1	7	1.87233	0.116001	0.0579194	Cdkn2a	2	0.784707	0.957949	0.882746	Rps7	26	0.632879	0.108991	0.0141284	Rps14	12	-0.492796	0.180594	0.0364165	STAU1		SUPT5H
Cux1	4	5.64483	6.28522e-13	2.87757e-14	Rpl13a	2	2.52714	0.0447934	0.017549	Rpl13a	2	2.15372	0.103194	0.0486647	H2afx	5	0.781932	0.330722	0.0511311	Srsf2	11	0.632372	0.206389	0.0595354	Dhx29	5	1.06035	0.187237	0.0397362	STAU2		EIF3F
Rbm8a	4	5.62455	9.24014e-14	3.33981e-15	Rpl26	6	2.51041	0.0602591	0.0264206	Rpl26	6	1.95901	0.110105	0.0539356	Praf2	2	0.780117	0.121158	0.0046434	Ndufa10	9	0.631635	0.113076	0.0159786	Zc3h15	3	0.401725	0.187237	0.0398779	TRMT1L		SLC33A1
Cherp	10	5.59185	3.5341e-12	2.00124e-13	Dus3l	9	2.49572	0.00704636	0.00100437	Dus3l	9	2.05358	0.0418193	0.014614	Srbd1	21	0.771088	0.200584	0.0134282	Uqcrh	5	0.627847	0.108744	0.014019	Apex1	15	-0.30041	0.187237	0.0402594	METTL3		PDE2A
Ccar1	9	5.58713	1.00411e-11	6.7747e-13	Snrpb	3	2.49401	0.004952	0.00051496	Snrpb	3	1.53772	0.0256686	0.00733201	Etfdh	4	0.767993	0.11354	0.00398905	Elovl5	2	0.62623	0.16077	0.034046	Ddx39b	8	0.415385	0.191695	0.0426111	REXO2		IPO5
Chtop	5	5.5732	7.76629e-13	3.74279e-14	Cdc5l	10	2.45726	0.0110123	0.00195878	Cdc5l	10	3.75998	0.00364138	0.000228732	Thrap3	60	0.759875	0.404517	0.0944542	Ybx1	24	0.625806	0.150826	0.0288203	Rrbp1	77	0.582848	0.233049	0.0585492	MRPL52		POLRMT
Rbm5	9	5.56296	7.83975e-13	3.87265e-14	Khdrbs1	9	2.42324	0.0082628	0.00130886	Khdrbs1	9	3.08661	0.00829097	0.00120304	Cdk11b	5	0.759369	0.209449	0.0170082	Rrp15	3	0.623336	0.773503	0.622549	Rps25	15	-0.359163	0.235271	0.0597371	WDR3		EEF2K
Ncoa5	12	5.55853	3.11883e-12	1.72851e-13	Pds5b	2	2.4211	0.0583817	0.0247081	Pds5b	2	3.53509	0.0247607	0.00694618	Pabpn1	16	0.755786	0.168613	0.00912421	Atp5i	4	0.618495	0.129246	0.022162	Smarca5	39	0.367775	0.240277	0.0621405	CNOT11		SAP18
Sf3b1	35	5.51371	2.50172e-12	1.35635e-13	Eefsec	4	2.41267	0.0291616	0.00895654	Eefsec	4	3.19179	0.0147276	0.00322334	Rae1	3	0.754988	0.185416	0.0112604	Ndufa6	5	0.61756	0.150826	0.0288975	Prpf4b	9	-0.686856	0.243077	0.0636629	YTHDC1		IGF2BP3
Cdh6	7	5.47694	2.85452e-10	2.5106e-11	Prrc2a	3	2.36564	0.012144	0.00230544	Prrc2a	3	1.07796	0.157685	0.0837044	Rps18	22	0.754056	0.305274	0.0410051	Hmgb1	19	0.612104	0.0434976	0.00240654	Srsf1	18	-0.490804	0.247006	0.0659089	METTL2A		RTCA
Isy1	2	5.46435	5.4796e-12	3.49902e-13	Ddx54	2	2.31905	0.316548	0.228512	Ddx54	2	1.44637	0.629217	0.524221	Mrpl16	6	0.752137	0.238853	0.0225461	Znf593	3	0.608945	0.0819351	0.00755064	Hmgb3	7	-0.560625	0.247006	0.0658373	METTL2B		IFRD1
Cdh2	3	5.37405	3.71549e-12	2.14872e-13	Spats2	2	2.3182	0.0351057	0.0124377	Spats2	2	3.19527	0.0150314	0.00334381	Bub3	2	0.751401	0.185416	0.0114147	D8Ertd738e	6	0.607391	0.0329414	0.0014801	Ckap5	20	0.469059	0.26873	0.0760683	ZNF326		ELL2
Pqbp1	2	5.32832	5.7422e-11	4.28935e-12	Prpf4b	7	2.30933	0.059558	0.0257821	Prpf4b	7	3.79393	0.0145096	0.00310545	Wdr37	3	0.751103	0.635801	0.345201	Mfge8	3	0.607301	0.0908348	0.00938108	Spats2l	7	0.569939	0.276619	0.0811576	AKAP8		ZNF593
Cwc22	12	5.27164	9.69669e-11	7.71062e-12	Csnk1d	2	2.25585	0.00500402	0.00054454	Csnk1d	2	1.37677	0.029516	0.009119	Acadm	2	0.743372	0.282134	0.0332393	Atp5o	15	0.605641	0.124702	0.0206948	Rpl7a	29	0.331679	0.280361	0.0847067	AKAP8L		KPNA3
Cox5a	2	5.27092	1.50292e-09	1.52103e-10	Rab14	2	2.25452	0.547496	0.45084	Rab14	2	1.2958	0.923009	0.872928	Lsm6	2	0.741876	0.282794	0.0335178	Hepacam	8	0.597715	0.0613941	0.00441653	Hist1h1a	8	0.24003	0.299015	0.0928703	RPS14		USP9Y
Ctnnb1	10	5.26029	1.07995e-11	7.41655e-13	Rrp1b	2	2.24449	0.264203	0.182081	Rrp1b	2	3.30191	0.21515	0.124095	Zmat3	5	0.739484	0.363938	0.0754222	Dus3l	8	0.595684	0.332406	0.135103	Rps7	23	-0.382558	0.301189	0.0943409	ELAVL1		PES1
Peo1	2	5.2553	2.17956e-11	1.54932e-12	Hnrnpa2b1	37	2.24214	0.0149834	0.00340615	Hnrnpa2b1	37	2.74438	0.0078141	0.00108071	Adgrg1	2	0.734228	0.288626	0.0352548	Slc25a12	6	0.594272	0.108744	0.0138754	Rpl9	15	0.295951	0.30383	0.0962902	ELAVL2		SDCBP
Eif4a3	9	5.25286	1.75902e-10	1.44112e-11	Prpf3	2	2.23538	0.0528661	0.0215428	Prpf3	2	1.35216	0.223183	0.130078	Alyref	12	0.732	0.13899	0.00621814	Gpc4	3	0.588734	0.0562375	0.00392072	Nat10	6	0.528072	0.31154	0.0994983	ELAVL3		MPHOSPH10
Rnps1	2	5.19949	1.81028e-10	1.50493e-11	Mybbp1a	13	2.18603	0.178618	0.112311	Mybbp1a	13	4.04883	0.029516	0.00913676	Rps19	21	0.721387	0.106786	0.00341049	Cox7a2	3	0.582023	0.230047	0.0729137	Rcc2	10	-0.266684	0.313296	0.100831	ELAVL4		NOP56
Prpf4b	4	5.12244	1.43403e-11	1.00209e-12	Fam111a	4	2.17605	0.0217468	0.00591659	Fam111a	4	0.199638	0.950165	0.920293	Safb	43	0.714827	0.287974	0.0345405	Sdha	21	0.579162	0.0832923	0.00796704	Rpl26	21	-0.150841	0.327281	0.109363	PNN		DDX3X
Raly	12	5.09555	9.13852e-09	1.08748e-09	H1f0	4	2.17582	0.0127388	0.0025262	H1f0	4	2.62597	0.00812922	0.00115008	Tex10	5	0.711418	0.566329	0.251703	Nup93	2	0.577571	0.201401	0.0569488	Rpl15	12	0.161422	0.33051	0.113426	DDX41		RNASET2
Prpf8	15	5.09466	2.67449e-10	2.32004e-11	Hist1h2bp	11	2.16875	0.0705857	0.0330929	Hist1h2bp	11	3.30557	0.00903694	0.00143904	Tcf4	2	0.701731	0.207687	0.0153285	Slc25a18	16	0.577198	0.100241	0.0116336	Rpl7	26	0.245632	0.350999	0.124672	TNPO2		KPNA4
Prpf40a	7	5.08353	3.36914e-10	3.04771e-11	Top1	14	2.1276	0.00788307	0.00122011	Top1	14	3.75655	0.00346082	0.000175761	Fam98b	14	0.698453	0.209449	0.0185592	Lonp1	6	0.575335	0.0738987	0.00631613	Rpl27a	11	0.361625	0.360454	0.130213	TNPO1		SH2B2
Cdc5l	19	5.05797	1.53024e-12	8.11213e-14	Ddx39b	5	2.12604	0.0706711	0.0333273	Ddx39b	5	3.45366	0.0276596	0.00844806	Sh3pxd2b	9	0.698336	0.304858	0.0403157	Pum1	4	0.575134	0.0423773	0.00229393	Rpl3	35	0.29255	0.361677	0.131249	PUSL1		NEMP1
Snrpd2	3	5.03756	1.70599e-10	1.37713e-11	Farsa	6	2.0863	0.128908	0.074634	Farsa	6	1.50173	0.409036	0.291255	Erh	10	0.697153	0.436008	0.1228	Eefsec	4	0.574584	0.186926	0.0483203	Ddx18	10	0.644262	0.36231	0.132074	RBM43		GAPDHS
Pnn	19	5.03422	3.36914e-10	3.0968e-11	Sf1	10	2.08177	0.021062	0.00562843	Sf1	10	0.0434049	0.778379	0.69367	Lrrc47	3	0.695318	0.799809	0.596157	Uqcr10	2	0.571354	0.157651	0.0324509	Kif2a	16	0.543645	0.366617	0.137063	ZGPAT		UBFD1
Zc3h11a	7	5.03253	1.7074e-09	1.78968e-10	Kars	8	2.07225	0.0102213	0.00177977	Kars	8	1.59869	0.0215535	0.00584847	Edc4	3	0.691864	0.414828	0.100196	Rps18	23	0.566078	0.021386	0.000737655	Eftud2	38	0.194601	0.369065	0.140849	SCAF11		EIF1AY
Cdh20	3	5.02741	1.87873e-10	1.58447e-11	Rrbp1	49	2.05356	0.00632542	0.000795458	Rrbp1	49	3.55281	0.0026447	0.000112927	Gpnmb	2	0.68305	0.264287	0.0264931	Chmp4b	3	0.562625	0.113076	0.016195	Yars	15	-0.223379	0.369065	0.140051	USP39		CHD2
Hnrnpl	13	5.00497	3.29313e-10	2.93604e-11	Prps2	2	2.05095	0.0371708	0.0133941	Prps2	2	1.27111	0.147971	0.0778326	Ddx19a	5	0.669129	0.665237	0.381485	Hmgn2	10	0.562444	0.441621	0.227102	Myef2	47	-0.204	0.373848	0.145487	RPL38		KMT2D
Tcof1	17	4.98892	1.01114e-09	9.98962e-11	Gcn1	3	2.04515	0.0164371	0.00398546	Gcn1	3	3.07505	0.0054547	0.00045678	Rps9	26	0.667244	0.198675	0.0129724	Srsf10	7	0.561017	0.0439484	0.00247288	Wdr6	2	-0.770907	0.375261	0.14698	NARS		RGPD8
Sap18	2	4.96384	3.36914e-10	3.12559e-11	Smarca5	12	2.03172	0.00758072	0.00114549	Smarca5	12	1.80423	0.0169953	0.00388406	Uqcrq	4	0.663047	0.566777	0.253018	Timm50	3	0.560104	0.216403	0.0633594	Psip1	17	0.139118	0.382061	0.152134	RPS16		TRDMT1
Smu1	3	4.94704	8.01687e-11	6.08509e-12	Sgpl1	3	1.98328	0.397865	0.306266	Sgpl1	3	2.89079	0.103315	0.0488464	Tmem33	6	0.662396	0.566329	0.249881	Pdap1	3	0.559098	0.585607	0.37372	Top1	19	0.494688	0.39108	0.156796	CLASRP		RIOK3
Mbd3	4	4.87867	9.76038e-10	9.52519e-11	Skiv2l2	5	1.97374	0.0275441	0.00815999	Skiv2l2	5	2.4733	0.0150314	0.00334435	Fmr1	28	0.655787	0.413184	0.0979442	Mrpl46	2	0.558003	0.0334798	0.00154999	Zfr	30	0.277733	0.399621	0.16536	RPS9		PRMT5
Rbbp4	6	4.83917	1.51256e-09	1.54901e-10	Ccdc59	2	1.94383	0.145178	0.0863538	Ccdc59	2	2.00167	0.116799	0.0584699	Dhx29	6	0.653099	0.414894	0.104265	Gpc1	2	0.555333	0.412358	0.20148	Mest	10	0.0934022	0.404667	0.171071	TOP3B		SLC9A3R1
Ppig	3	4.83704	1.82669e-09	1.93674e-10	Kif2a	14	1.93151	0.00651026	0.000905297	Kif2a	14	1.50158	0.0514443	0.0194705	Nudcd2	3	0.649454	0.319838	0.0456443	Cct7	15	0.555231	0.156899	0.0320238	Kars	14	0.203223	0.412765	0.179987	NCBP2L		TERT
Ilf3	8	4.82305	6.72827e-09	7.45784e-10	Ppp1ca	2	1.93038	0.0354988	0.0126199	Ppp1ca	2	-0.145625	0.630149	0.525759	Chd6	3	0.646427	0.532582	0.192904	Cox5b	6	0.553021	0.142648	0.0260098	Rps6	22	-0.186202	0.412765	0.180367	NCBP2		TCERG1
NA	3	4.82299	1.6102e-09	0.931267	Prpf4	5	1.91713	0.0064192	0.000861586	Prpf4	5	0.506791	0.340155	0.223342	Ybx3	7	0.627382	0.279368	0.0319221	Rac1	6	0.551601	0.0819351	0.0077033	Eif2s1	24	0.427144	0.435355	0.204453	SMG9		TNPO2
Arpc2	3	4.82028	2.9219e-07	4.32558e-08	Hnrnpa3	33	1.91525	0.00926455	0.00155716	Hnrnpa3	33	3.29101	0.00406058	0.000274961	Yy1	2	0.62235	0.929705	0.823471	Tomm70	9	0.545099	0.0716345	0.00562492	Dnajc2	2	0.293503	0.436296	0.205253	FTSJ2		POLR3A
Trps1	2	4.80452	2.41433e-08	2.9961e-09	Hmgb3	5	1.90925	0.0110123	0.00200598	Hmgb3	5	2.33704	0.0172443	0.00400902	Fkbp3	7	0.620267	0.427025	0.118339	Uqcrfs1	14	0.541099	0.128318	0.0218433	Rpl23a	18	-0.0310329	0.441053	0.209536	DDX56		SCAMP3
Elavl1	7	4.8023	5.0147e-08	6.52516e-09	Prpf19	4	1.90335	0.189774	0.121391	Prpf19	4	2.40635	0.0709464	0.0298541	Mrpl1	2	0.610487	0.493099	0.157834	Ndufs6	4	0.540422	0.187757	0.0489452	Eif2ak2	11	-0.26236	0.469467	0.232624	RBM28		PPEF1
Xab2	4	4.77782	4.45138e-11	3.2715e-12	Pym1	2	1.87558	0.026879	0.00783294	Pym1	2	0.855324	0.112461	0.0553466	Eif4b	6	0.61026	0.505117	0.1667	Cox5a	5	0.540011	0.103828	0.0124325	Hnrnph2	7	-0.671313	0.471193	0.235105	UTP11L		TNFRSF13B
Drosha	20	4.71029	1.51422e-08	1.84261e-09	Fau	4	1.87361	0.157252	0.0964046	Fau	4	-0.244045	0.62684	0.520725	Ybx1	22	0.608922	0.282134	0.0331882	Cyc1	10	0.539631	0.19513	0.0537858	Ddx50	15	0.168555	0.508759	0.269834	MRPS18B		IFIT3
Acin1	15	4.70287	7.24084e-09	8.20047e-10	Lars	2	1.86617	0.00829743	0.00133441	Lars	2	-0.363869	0.651397	0.549788	Pdia6	6	0.607305	0.106786	0.0033381	Mrps30	5	0.538442	0.16077	0.0346962	Fkbp3	8	-0.322432	0.51025	0.273139	RPL14		GEMIN2
Tfip11	4	4.6941	9.13852e-09	1.09002e-09	Hnrnpa0	22	1.86573	0.0255297	0.00736879	Hnrnpa0	22	2.51832	0.0138986	0.0029118	Rpl37	3	0.607245	0.757554	0.523639	Akap9	2	0.538438	0.693633	0.511826	Ilf2	21	-0.341209	0.530003	0.292802	RPL37		TFEC
Snrnp200	10	4.67253	1.91507e-08	2.35346e-09	Dcaf13	3	1.78998	0.0739057	0.0354308	Dcaf13	3	2.62171	0.0188029	0.00467208	Trim56	2	0.600323	0.0913109	0.0021977	Idh3a	11	0.536807	0.0329414	0.0015016	Snrpc	6	0.113525	0.530371	0.29349	GEMIN5		CASQ2
Rab31	2	4.6621	6.27392e-06	1.2699e-06	Purb	2	1.78152	0.0824803	0.0406916	Purb	2	3.46552	0.00850904	0.00130671	Nifk	5	0.595594	0.115988	0.00436293	Rcn2	5	0.536216	0.174038	0.0417741	Ilf3	51	-0.1746	0.539292	0.301938	MKRN1		HNRNPDL
Mta2	5	4.6268	2.77203e-08	3.47339e-09	Srsf10	8	1.78075	0.0978658	0.0520691	Srsf10	8	1.9746	0.0776825	0.0339098	Dnajb12	6	0.595096	0.565465	0.246814	Rab2a	4	0.531051	0.115428	0.0172895	Chd4	37	0.11354	0.553715	0.31459	MKRN2		XPO1
Wtap	2	4.61225	3.17403e-09	3.40347e-10	Eif2s1	14	1.78012	0.0142293	0.00306266	Eif2s1	14	2.75844	0.00519395	0.000405176	Atp5e	2	0.585276	0.200584	0.0136665	Trmt2a	6	0.527882	0.127615	0.021477	Eif3d	11	0.223273	0.563541	0.324337	MKRN3		ZNF646
Snw1	12	4.57141	9.09716e-10	8.65874e-11	Tcerg1	2	1.77996	0.0319278	0.0104238	Tcerg1	2	2.42528	0.0145748	0.00313808	Tmco1	4	0.582003	0.414828	0.101722	Ptdss1	2	0.526846	0.491325	0.274358	H1f0	8	-0.277861	0.592228	0.351177	NOA1		KHNYN
Gatad2b	6	4.562	7.32847e-09	8.38801e-10	Usp10	2	1.77676	0.0323199	0.011099	Usp10	2	1.76593	0.0195849	0.00490215	Tmem120a	3	0.576935	0.231074	0.0214838	Mrpl33	3	0.525534	0.0938733	0.0101629	Rpl24	13	0.115247	0.624706	0.391818	PINX1		U2SURP
Cep170	2	4.54508	4.68713e-08	5.98598e-09	Gtpbp1	12	1.75307	0.17666	0.110653	Gtpbp1	12	2.94457	0.0442831	0.0158498	Hnrnpa3	42	0.574362	0.352007	0.0613217	Hmga1	6	0.522381	0.0819351	0.00756	Gtpbp1	7	0.056296	0.629842	0.398693	HRSP12		SETD1A
Son	12	4.52592	4.67341e-09	5.12386e-10	Ilf3	19	1.72137	0.0142637	0.00313904	Ilf3	19	3.72698	0.00364138	0.000232529	Naca	7	0.571657	0.10459	0.00294707	Tmtc3	3	0.521126	0.519972	0.301999	Rps4x	35	0.0485711	0.634442	0.408005	TDRD9		SYNJ2
Rbm10	18	4.47513	4.69457e-08	6.05204e-09	Abcf1	18	1.72086	0.0347079	0.0122548	Abcf1	18	3.16522	0.0078141	0.00107765	Rps25	15	0.570164	0.414894	0.103205	Etfdh	6	0.519605	0.16077	0.034048	Rsl1d1	24	-0.128388	0.636037	0.409964	DHX30		KIAA0391
Erh	5	4.45609	3.41386e-08	4.31873e-09	Ipo5	2	1.71034	0.80753	0.759683	Ipo5	2	4.68579	0.453458	0.33228	Pgam5	10	0.566842	0.414894	0.105753	Pgrmc1	5	0.518018	0.315374	0.123993	Rps15a	16	0.216979	0.657194	0.442446	DHX29		SMAD7
Snrpe	2	4.45317	9.07377e-08	1.24628e-08	Rpp30	2	1.6984	0.720884	0.649253	Rpp30	2	2.2392	0.571189	0.456537	RtcA	13	0.563067	0.0898958	0.00197784	Lrrc47	7	0.516704	0.253636	0.0849705	Dnmt1	10	0.260707	0.658554	0.446065	DHX57		LSM1
Hnrnpll	2	4.41471	1.28534e-07	1.79638e-08	Snrpd3	5	1.69077	0.0291616	0.00894923	Snrpd3	5	2.50944	0.00842613	0.00124663	Mrps36	2	0.554788	0.209449	0.0191106	Atp5j2	4	0.51518	0.0888885	0.00867359	Emc1	26	-0.380664	0.673017	0.469237	YTHDC2		SCAMP2
Pcnp	5	4.40718	8.54205e-08	1.16295e-08	Bub3	2	1.66647	0.064379	0.0287253	Bub3	2	2.74153	0.00903694	0.00144241	Scd2	6	0.553165	0.7516	0.510382	Chchd3	12	0.515048	0.16077	0.0337476	Phf6	10	0.134548	0.68683	0.4868	DHX36		ARPC1B
Hnrnpc	13	4.40706	1.32359e-08	1.59469e-09	Snrpc	4	1.66328	0.0395376	0.0146772	Snrpc	4	1.87946	0.0269484	0.00807463	Rpl36a	14	0.551452	0.412337	0.0974508	Dgat1	2	0.514712	0.883363	0.781436	Spon1	19	-0.160961	0.687038	0.489183	DHX9		POLR1C
Rpl30	4	4.40096	2.09342e-06	3.70762e-07	Caprin1	6	1.66037	0.0159983	0.00377773	Caprin1	6	2.07443	0.0173367	0.00416989	Slc25a1	8	0.547278	0.434202	0.121416	Rps10	23	0.51397	0.12273	0.0199016	Dus3l	10	0.141896	0.692399	0.495708	EIF3G		SMAD9
Usp39	2	4.33444	9.05944e-09	1.05875e-09	Zmat3	5	1.64728	0.0694267	0.031901	Zmat3	5	-1.21964	0.575514	0.461937	Dgcr8	4	0.545431	0.354313	0.0627186	Mrps12	2	0.513241	0.745524	0.585234	Rpl35a	14	0.225843	0.733749	0.553571	NOL10		WDR46
Rab7a	2	4.30275	7.31507e-06	1.49827e-06	Emc1	4	1.64513	0.358785	0.267679	Emc1	4	3.81829	0.039226	0.013186	Tpi1	2	0.54524	0.782167	0.572539	Mtco2	3	0.51136	0.119867	0.0187825	Eif5b	13	0.174096	0.738449	0.560809	UTP15		NKRF
Zc3h18	4	4.29014	6.46408e-07	9.81294e-08	Nifk	5	1.63831	0.022984	0.00639216	Nifk	5	2.74856	0.0174142	0.00423247	Hnrnpa0	28	0.544306	0.168613	0.00861321	Dido1	2	0.509499	0.168195	0.0394132	Rpn2	18	0.0839847	0.745669	0.57092	GATC		CASC3
Lemd3	2	4.26658	3.0358e-07	4.53541e-08	Rbm15b	4	1.63643	0.094448	0.049451	Rbm15b	4	3.05821	0.0197781	0.00502225	Ddx18	12	0.542371	0.414894	0.10382	Aldh2	4	0.507947	0.165398	0.0373927	Srsf5	13	0.146763	0.775557	0.61446	TCOF1		MRPS12
Crnkl1	5	4.21355	4.07231e-09	4.41575e-10	Snrpd2	8	1.63053	0.0322546	0.0108587	Snrpd2	8	3.03403	0.00582146	0.000617102	Cherp	4	0.542009	0.334065	0.053109	Ccdc124	3	0.506476	0.66172	0.467481	Prpf4	6	-0.128159	0.825805	0.679294	NONO		POLR3G
Znf326	5	4.20827	6.46767e-08	8.57161e-09	Hp1bp3	4	1.62892	0.0322546	0.0107316	Hp1bp3	4	3.41844	0.00471931	0.000336686	Dhx36	17	0.540686	0.168334	0.00824346	Acadvl	10	0.505483	0.115428	0.0174292	Abcf1	12	0.0293646	0.831866	0.688106	PSPC1		HMGB3
Pabpc1	16	4.20585	1.1348e-06	1.87311e-07	Hnrnpll	8	1.61123	0.0334143	0.0115817	Hnrnpll	8	1.50868	0.0262396	0.00767833	Fau	6	0.535967	0.288626	0.0355938	Ndufb7	2	0.504586	0.216403	0.0640912	Hist1h2bp	12	-0.15636	0.846751	0.707711	SFPQ		PPM1G
Apc	25	4.18561	2.27636e-07	3.29112e-08	Eif3e	2	1.60857	0.0164371	0.00398886	Eif3e	2	-1.21012	0.125666	0.0636688	Rpl19	16	0.535223	0.412337	0.097211	Mff	2	0.501792	0.909388	0.827831	Pa2g4	19	0.168749	0.849407	0.714351	NUDT21		EIF3D
Hnrnpf	6	4.16716	3.23289e-06	5.95943e-07	Mtdh	2	1.59174	0.0507373	0.0203072	Mtdh	2	2.19624	0.0263822	0.00775197	Taok1	6	0.535208	0.207687	0.0153296	Phb2	20	0.499681	0.0892007	0.00885813	Eef1d	9	0.0351093	0.867791	0.750233	MRPL19		EIF3H
Rbm25	10	4.15461	1.29326e-07	1.82303e-08	Rpl35a	5	1.58661	0.0296424	0.00928342	Rpl35a	5	2.38614	0.0078141	0.0010866	Mthfd1l	14	0.533809	0.177553	0.00995504	Stoml2	8	0.499367	0.120174	0.0189163	Ptn	10	-0.273456	0.871534	0.762217	URM1		NVL
Tmpo(lap2a)	8	4.15307	2.9219e-07	4.33005e-08	Ktn1	3	1.58572	0.241652	0.16305	Ktn1	3	-0.0335667	0.816918	0.740857	Rtn4	5	0.532904	0.559571	0.221012	Cct6a	22	0.497948	0.106641	0.0130643	Nifk	6	0.0173478	0.871825	0.763811	MRPL53		BCAT2
Tmpo(lap2b)	22	3.4162	4.81883e-05	1.27049e-05	Ptn	7	1.56666	0.0404659	0.0151197	Ptn	7	2.62563	0.00605025	0.000673063	Frg1	3	0.532798	0.288626	0.0355826	Dimt1	2	0.495924	0.334779	0.136695	Atp2a2	39	-0.187985	0.874782	0.767768	RBM48		IPO8
Frg1	2	4.14346	7.40898e-07	1.16044e-07	Srpk1	4	1.55914	0.012144	0.00229618	Srpk1	4	4.0161	0.00237846	8.34383e-05	Fh	2	0.528662	0.560159	0.234196	Nup98	2	0.494347	0.0553025	0.00374198	Prkra	14	0.0110514	0.88074	0.782949	REPIN1		STX7
Ap2m1	2	4.13898	1.01946e-06	1.67043e-07	Rpl36a	3	1.53923	0.148511	0.0885319	Rpl36a	3	-0.961867	0.514096	0.395069	Hnrnpa2b1	44	0.524837	0.464504	0.13978	Trim56	4	0.492745	0.1623	0.0358355	Septin 09	23	-0.0460527	0.88074	0.783844	ZC3H12B		SLC16A3
Mtch2	2	4.09553	9.99251e-07	1.62529e-07	G3bp2	4	1.53155	0.0528661	0.0215345	G3bp2	4	0.929032	0.334741	0.219383	Rbbp6	6	0.522607	0.137931	0.00587357	Rps20	8	0.49209	0.172615	0.0410638	Hsd17b12	21	-0.0641838	0.903307	0.818892	ZC3H12C		CD3EAP
Hnrnpk	13	4.08471	1.39035e-06	2.32841e-07	Ncoa5	7	1.52201	0.0322546	0.0106648	Ncoa5	7	2.00485	0.018049	0.00445223	Crnkl1	2	0.520325	0.531665	0.18998	Cct8	25	0.491781	0.151206	0.0294011	Iars	5	-0.113913	0.903307	0.821361	ZC3H12D		TLR3
Polr2a	2	4.08091	5.74713e-06	1.13558e-06	Fxr1	16	1.50935	0.154	0.0933397	Fxr1	16	2.8179	0.0273946	0.00828019	Gtpbp4	12	0.520283	0.363938	0.0743631	Toe1	2	0.489392	0.7417	0.57604	Rpn1	41	-0.166183	0.909799	0.832862	ZC3H12A		MAGEB4
Syncrip	5	4.05423	1.91879e-06	3.3521e-07	Dst	2	1.50908	0.510352	0.413465	Dst	2	2.16078	0.194873	0.109499	Fam98a	7	0.518707	0.255358	0.0250102	Septin 4	2	0.488958	0.505357	0.284215	Camk2b	10	0.0945996	0.927152	0.860696	TRMT5		CAPN5
Cd2bp2	3	4.02561	7.03771e-08	9.41188e-09	Rsl1d1	16	1.50421	0.0187192	0.00488918	Rsl1d1	16	3.54573	0.005058	0.000385313	Apex1	13	0.51666	0.185416	0.0118435	Rbm28	6	0.488365	0.230081	0.0730884	Canx	33	-0.169179	0.929569	0.869387	TRMT61A		NUPL2
Matr3	18	4.02543	2.81554e-07	4.10459e-08	Srp68	2	1.50152	0.132802	0.0774009	Srp68	2	2.80945	0.0161766	0.00363826	Cox7c	3	0.507825	0.255118	0.0248057	Etfb	6	0.486885	0.0486194	0.00294349	Eif3a	48	0.0849819	0.931129	0.872264	PABPN1L		POLR2D
Cwc27	17	4.01944	1.68621e-06	2.88485e-07	Ddx5	31	1.49727	0.0119213	0.00222129	Ddx5	31	3.09024	0.00431261	0.000302456	Lmf2	3	0.507389	0.168613	0.00878994	Dpy19l4	2	0.486625	0.70768	0.53076	Hadhb	32	0.0665585	0.980705	0.940446	PABPN1		FGF10
Srsf3	7	4.01105	4.21998e-06	8.03322e-07	Nsun5	3	1.49256	0.0587733	0.0249449	Nsun5	3	0.93209	0.141172	0.0734028	Impdh2	7	0.506752	0.338692	0.054085	Mrpl40	2	0.48655	0.0987426	0.0111824	Hist1h1b	13	-0.0729752	0.983407	0.946499	LSG1		DDX3Y
Srsf10	5	4.00443	1.79487e-06	3.09237e-07	Dhx29	6	1.48243	0.015646	0.00359462	Dhx29	6	0.677953	0.324331	0.210991	Aldh18a1	6	0.503602	0.352007	0.0617074	Atp5j	5	0.481363	0.117189	0.0178622	Rpl17	20	-0.106161	0.983407	0.950404	GNL1		RNF113A
Ptbp1	4	4.00141	2.17532e-06	3.87888e-07	Syncrip	37	1.4789	0.0357711	0.01276	Syncrip	37	1.55474	0.0430624	0.0153397	Hnrnpa1	41	0.502367	0.305996	0.0416823	Csde1	18	0.478342	0.115428	0.0173882	Mybbp1a	52	0.108705	0.983856	0.956189	EEF1G		KDM6A
Mfap1a	7	4.00054	7.92295e-08	1.06912e-08	Rpl7	6	1.47302	0.392176	0.300653	Rpl7	6	2.44631	0.0996034	0.0467305	Sec61g	3	0.488033	0.380796	0.0824293	Gng12	4	0.477682	0.16077	0.0341723	Eif2s2	11	0.114074	0.997893	0.989755	RBM33		DHX15
Hnrnph1	5	3.97454	6.22348e-06	1.25219e-06	Hist1h1d	14	1.4644	0.132196	0.076888	Hist1h1d	14	0.520937	0.386332	0.268143	Usmg5	3	0.485509	0.356597	0.0655321	Mapt	2	0.475471	0.108744	0.0139456	Hadha	51	0.0421769	0.999549	0.998697	RPP25		RNMT
Ddx1	8	3.96899	1.92719e-05	4.27233e-06	Gsk3b	2	1.45552	0.250116	0.16997	Gsk3b	2	3.66539	0.0100099	0.00168438	Atp5o	16	0.484952	0.185416	0.0114426	Nup35	3	0.473496	0.0562503	0.00396637						RPP25L		RRP8
Eif2s3x	3	3.96854	3.02922e-05	7.39072e-06	Metap1	2	1.45119	0.0546264	0.0227225	Metap1	2	1.94163	0.0215535	0.0058485	Baz1b	5	0.483321	0.172441	0.00954603	Cox7c	4	0.47225	0.0832923	0.00789384						RPP38		ZBTB24
Ik	10	3.95042	6.6258e-07	1.01383e-07	Ewsr1	2	1.43349	0.0308687	0.00981676	Ewsr1	2	-1.0048	0.171912	0.0933357	Tmtc3	3	0.481887	0.718533	0.449275	Hadha	50	0.470538	0.0656078	0.00476638						GARS		PRPF4
Nap1l1	2	3.93968	4.208e-05	1.06467e-05	Strap	7	1.39956	0.0255297	0.00737799	Strap	7	-0.0487865	0.640897	0.537864	Gbas	6	0.478636	0.3469	0.0570882	Slc1a4	2	0.468799	0.30729	0.119501						DRG2		PHGDH
Axin2	3	3.9394	9.19195e-06	1.94914e-06	Hbs1l	4	1.3881	0.0271944	0.0080085	Hbs1l	4	1.22645	0.0351188	0.0115081	Fip1l1	2	0.469702	0.427874	0.119202	Agrn	7	0.468295	0.0819351	0.00755964						TRMU		PHF1
Hnrnpd	6	3.8978	1.85673e-06	3.22132e-07	Rps27	2	1.37058	0.124683	0.0708599	Rps27	2	-0.146127	0.374887	0.25476	Tmx2	7	0.466621	0.200584	0.0132644	Atp1a1	5	0.46625	0.162263	0.0353966						GNL2		DYNC1LI2
Fxr1	9	3.88257	2.03745e-05	4.66405e-06	Hadha	19	1.36085	0.211547	0.137876	Hadha	19	2.0514	0.0322038	0.0103971	Cpsf6	5	0.466226	0.364671	0.075833	H2afy2	3	0.465719	0.164984	0.0370155						CPSF2		RBFOX2
Slc6a11	2	3.87695	2.38843e-05	5.61012e-06	Pa2g4	12	1.34893	0.0861207	0.0431124	Pa2g4	12	2.26686	0.0114197	0.00204367	Zc3h13	10	0.46563	0.304858	0.0404603	Luc7l3	12	0.464402	0.113076	0.0156127						CD3EAP		PAPSS1
Gsk3b	3	3.84776	1.41653e-05	3.10612e-06	Fmr1	12	1.34784	0.0380955	0.0139286	Fmr1	12	2.98695	0.0054547	0.000468299	Lpcat1	7	0.461874	0.288774	0.0359708	Glud1	31	0.464302	0.38022	0.165737						HDLBP		SART1
Cct6a	2	3.82207	3.48462e-05	8.60659e-06	Hnrnpu	42	1.33901	0.0316112	0.010216	Hnrnpu	42	1.4229	0.069642	0.0290526	Zc3h14	9	0.459677	0.584185	0.274546	Sdhb	10	0.464027	0.170422	0.0401799						RDM1		CTIF
Hmgcr	2	3.81812	1.13759e-05	2.42595e-06	Noa1	2	1.31598	0.0806263	0.0394845	Noa1	2	2.10389	0.0173367	0.00412319	Luc7l	9	0.457811	0.330722	0.0511693	Echs1	5	0.463173	0.0928404	0.00985272						BYSL		ATMIN
Hnrnpm	23	3.79909	4.47283e-06	8.7301e-07	Ap2a2	2	1.30812	0.805214	0.755558	Ap2a2	2	0.905274	0.358585	0.239456	Rps4x	36	0.457771	0.319838	0.0456184	Eif1ax	3	0.463079	0.149773	0.0284825						GEMIN8		EEF1E1
Hnrnpa3	16	3.79664	7.01593e-06	1.42854e-06	Capza1	2	1.28968	0.0539234	0.0222996	Capza1	2	2.15324	0.0265839	0.00784337	Hexb	6	0.456756	0.540157	0.198319	Rpl31	12	0.462174	0.0892007	0.00885069						XPO5		MSI1
Pkp4	3	3.79582	4.2936e-06	8.27682e-07	Glyr1	2	1.26656	0.0751979	0.0362805	Glyr1	2	3.22942	0.0130639	0.00260646	Rps10	25	0.455774	0.385807	0.0848192	Luc7l	11	0.460779	0.0680732	0.00509094						ZNF622		WDR62
Hnrnpdl	3	3.79015	6.22348e-06	1.25063e-06	Hdgf	3	1.23775	0.462804	0.368789	Hdgf	3	1.65783	0.238241	0.142327	Dpy19l1	2	0.453948	0.456363	0.135387	Rcc1	3	0.45508	0.168195	0.0389315						DZIP1		HNRNPR
Myef2	8	3.78981	7.68491e-06	1.58945e-06	Hnrnpdl	18	1.22697	0.0528661	0.0214515	Hnrnpdl	18	0.314542	0.7625	0.670021	Ctcf	15	0.45195	0.305996	0.0416971	Ctnnd2	2	0.453918	0.465358	0.247472						DZIP1L		PRPF3
Sltm	4	3.77292	4.4414e-05	1.14513e-05	Ilf2	12	1.22179	0.0489952	0.0194914	Ilf2	12	1.74218	0.0215259	0.00575239	Mark2	3	0.449348	0.415047	0.106634	Rpl36a	11	0.452898	0.305053	0.118197						GSPT1		TPD52L2
Marc2	2	3.76893	2.46324e-05	5.8168e-06	Yars	12	1.20212	0.380725	0.289572	Yars	12	2.01757	0.095378	0.0435948	Tbc1d10b	2	0.447793	0.202488	0.0140836	Ndufa7	9	0.451788	0.174091	0.0419108						HBS1L		ERI3
Zfr	6	3.76575	1.16403e-05	2.49636e-06	Srrm1	3	1.19345	0.117406	0.06644	Srrm1	3	-0.200519	0.789558	0.704587	Pgap1	7	0.447753	0.559571	0.212141	Acadl	5	0.450244	0.12273	0.0194708						GSPT2		THAP12
Hnrnpa2b1	17	3.75035	8.82847e-07	1.41468e-07	Fam98a	5	1.18197	0.0589641	0.0253824	Fam98a	5	0.791952	0.203435	0.115124	Rps5	16	0.44294	0.269491	0.0282907	Rpl30	12	0.447528	0.0716345	0.00548939						EIF2D		SYNJ1
Slc25a11	2	3.74851	0.00014553	4.68151e-05	Ddx50	4	1.15964	0.326899	0.240332	Ddx50	4	3.63071	0.0169458	0.00385226	Lrp1	2	0.440057	0.839642	0.66504	Dhrs13	4	0.447437	0.108734	0.01356						METTL1		EIF4G3
Hnrnpa0	7	3.73707	8.65447e-06	1.82474e-06	Rpl27	6	1.15716	0.115677	0.0644824	Rpl27	6	1.23211	0.134145	0.0690999	Rpp30	3	0.438914	0.467188	0.141299	Mrps2	2	0.445959	0.113076	0.0162688						RNASEH1		PPIH
Hist2h2ac	2	3.72779	0.00319528	0.00213276	Eif2ak2	4	1.12037	0.0609412	0.0268415	Eif2ak2	4	2.93597	0.00703918	0.000902241	Top3b	14	0.436736	0.274445	0.0301909	Atp5f1	11	0.44566	0.340569	0.139963						ZNHIT6		HTRA2
Rtcb	6	3.72166	7.68491e-06	1.59356e-06	Trmt1l	3	1.11787	0.562827	0.469545	Trmt1l	3	2.38337	0.0586058	0.0230313	Srsf9	12	0.433645	0.209449	0.0177539	Rps24	8	0.445039	0.124264	0.0205337						DARS2		EPB41L2
Wbp11	6	3.71314	3.04687e-06	5.57981e-07	Rpl24	4	1.11693	0.0834981	0.0414248	Rpl24	4	-1.02564	0.53525	0.421987	Stau1	20	0.433065	0.419947	0.110858	Cct5	16	0.444842	0.113076	0.0155011						SNRPD2		SMAD6
Vdac1	5	3.69314	0.000959121	0.000440271	Mest	6	1.11481	0.325291	0.237023	Mest	6	2.73196	0.0269484	0.00808125	Rps11	24	0.432446	0.436519	0.123831	Gpt2	5	0.443019	0.303673	0.116988						DICER1		DENR
Chst2	2	3.68822	5.75993e-05	1.56837e-05	Safb	11	1.09228	0.0701172	0.0324449	Safb	11	0.408618	0.497887	0.378081	Luc7l3	14	0.431507	0.623239	0.328202	Apoo	2	0.440605	0.168195	0.0393728						DYNLL1		XPOT
Ccdc9	3	3.68187	5.31183e-10	4.99184e-11	Eif3d	7	1.08883	0.112133	0.0619646	Eif3d	7	1.42817	0.047414	0.0171997	Zfp41	2	0.427464	0.671255	0.393782	Rps14	11	0.440188	0.0469602	0.00277241						ZNF638		PLRG1
Srsf7	3	3.67778	1.96675e-05	4.38372e-06	Hnrnpa1	23	1.07899	0.0897976	0.0459303	Hnrnpa1	23	2.28618	0.0119816	0.00224545	Btbd17	2	0.427349	0.584185	0.273628	Rsrc2	2	0.439529	0.34511	0.142813						SAMD4B		ZNF207
Srrm2	36	3.67566	4.12336e-06	7.79962e-07	Eif4e	3	1.05513	0.511132	0.414715	Eif4e	3	0.100991	0.962137	0.944686	Snrpd1	5	0.427167	0.205007	0.0148408	Suclg1	5	0.43917	0.165398	0.0375383						SAMD4A		AKAP7
Prpf31	3	3.66023	4.35072e-06	8.43935e-07	Hadhb	9	1.05038	0.160866	0.0992041	Hadhb	9	1.67944	0.0709464	0.0298079	Sec61a1	8	0.426505	0.436008	0.123159	Rps5	17	0.437762	0.0612471	0.00436233						RTF1		ACTN4
Iqsec2	2	3.63825	7.68491e-06	1.60179e-06	Apex1	9	1.03491	0.0445135	0.0173856	Apex1	9	1.92767	0.0120602	0.0023187	Camk2b	14	0.423981	0.559571	0.212059	Adgrg1	4	0.435806	0.103828	0.0124979						CNOT4		GSTZ1
Csde1	6	3.63661	3.56431e-05	8.84635e-06	Trmt10c	2	1.03186	0.152312	0.0914649	Trmt10c	2	-0.25245	0.954917	0.929514	Wbp11	5	0.421597	0.319838	0.0462748	Pum2	2	0.434038	0.829484	0.698326						TARBP2		WBSCR22
Hnrnpa1	13	3.61775	5.96629e-06	1.18607e-06	Ddx17	13	1.02995	0.0342159	0.0119983	Ddx17	13	2.66066	0.00561447	0.000549906	Safb2	15	0.41972	0.298274	0.0387008	Sfxn1	12	0.433735	0.216403	0.0636334						PRKRA		GATC
Rfc1	2	3.6164	0.000100812	2.96363e-05	Mcm5	2	1.01126	0.0705857	0.0331164	Mcm5	2	1.84687	0.0145748	0.00315465	Atp5h	10	0.418942	0.359818	0.0681837	Ubr4	3	0.433129	0.226846	0.0695834						GLE1		HTATSF1
Rbmxl1	24	3.60335	3.34194e-06	6.20071e-07	Stip1	3	1.0013	0.787655	0.735272	Stip1	3	0.741367	0.819577	0.744259	Chtop	9	0.41732	0.320485	0.0480664	Dbt	5	0.431823	0.12273	0.0199306						EXOSC2		TRAF3IP2
Fxr2	10	3.59304	2.5096e-05	6.01699e-06	Ddx52	3	0.988251	0.325291	0.237183	Ddx52	3	3.11821	0.0230744	0.00636151	Glud1	29	0.417268	0.262671	0.0260993	Wbp11	5	0.431257	0.0725963	0.00599839						SSU72		ENSA
Hnrnpul2	7	3.58771	1.18017e-06	1.96221e-07	Srsf5	8	0.97538	0.128438	0.0736148	Srsf5	8	1.93195	0.0201617	0.0052724	Rpl22l1	5	0.41701	0.269491	0.0284984	Znf771	3	0.430742	0.353595	0.148339						GTPBP10		NARS
Slc25a4	6	3.58194	4.21813e-05	1.0774e-05	Rpl9	14	0.973709	0.117351	0.0659831	Rpl9	14	3.04483	0.00595781	0.000650606	Ermp1	8	0.416722	0.204207	0.0145074	Rab8a	2	0.425879	0.383572	0.171842						RPL10A		NUDT21
Ssb	4	3.57058	2.5096e-05	5.9872e-06	Pura	2	0.964256	0.239536	0.160752	Pura	2	-0.528638	0.643892	0.541897	Znf787	4	0.415133	0.601641	0.292921	Rab14	2	0.423507	0.111757	0.0148269						HENMT1		RRP9
Rplp0	6	3.55695	0.000111634	3.30967e-05	Khdrbs3	7	0.954965	0.0944087	0.0492021	Khdrbs3	7	1.19502	0.115141	0.0572225	Serpine2	16	0.414747	0.354313	0.063141	Hist1h1e	7	0.422737	0.156899	0.0316836						THOC2		HYAL3
Znf638	2	3.5538	3.65169e-05	9.10723e-06	Hmgb1	11	0.947508	0.0994955	0.0534172	Hmgb1	11	1.69449	0.0684946	0.0284911	Mrps14	3	0.411983	0.890491	0.744498	Eif4b	4	0.422261	0.505162	0.283431						ENDOG		AKAP8
Hnrnpab	4	3.55071	2.2287e-05	5.15555e-06	Alyref	10	0.933392	0.0967808	0.0512789	Alyref	10	1.64448	0.0653388	0.0261513	Spats2	8	0.409221	0.359818	0.0691113	Rpl29	6	0.421049	0.766031	0.608896						EXOG		GTPBP6
Slc25a12	2	3.54441	2.99826e-05	7.26085e-06	Ckap4	2	0.898381	0.415711	0.323721	Ckap4	2	3.65527	0.00561447	0.000545744	Mark3	22	0.406973	0.307402	0.0421068	Tufm	9	0.420887	0.129246	0.0221854						ASH1L		NRDC
Magohb	2	3.52589	1.45424e-05	3.20633e-06	Eif5b	9	0.892177	0.154	0.0932771	Eif5b	9	2.16758	0.0215535	0.00586401	Tdrd3	16	0.406275	0.442294	0.127651	Hist2h2bb	10	0.419809	0.23732	0.0767403						TRMT10C		CALU
Ctnnd2	25	3.52253	2.19399e-05	5.04883e-06	Atxn10	2	0.873913	0.158583	0.0974127	Atxn10	2	2.74497	0.0119816	0.00221938	Cox5b	6	0.399933	0.394964	0.0902614	Fau	6	0.418981	0.453386	0.23735						TRMT10A		AHCYL1
Rbm26	4	3.49603	2.704e-06	4.85416e-07	Rpl23a	14	0.873331	0.109637	0.0601048	Rpl23a	14	2.65138	0.00842613	0.0012607	H2afy2	6	0.397225	0.776218	0.565378	Map2	34	0.418676	0.276399	0.0996932						TRMT10B		KIF1C
Fam120c	4	3.49358	5.62129e-06	1.10394e-06	Drosha	2	0.866695	0.300615	0.212305	Drosha	2	1.43276	0.195687	0.110266	Ddx6	8	0.395374	0.566201	0.248004	Ndufa2	5	0.417654	0.151313	0.0297044						MRPL33		GAS2
Pgam5	8	3.49319	6.91011e-05	1.93982e-05	Rps7	16	0.865518	0.300615	0.212648	Rps7	16	2.29431	0.019953	0.00513905	Ndufa2	4	0.394793	0.532582	0.193055	Tcerg1	9	0.416634	0.191089	0.0504017						SSB		TIMM8A
Atp1a1	3	3.48332	5.66922e-05	1.53684e-05	Dnmt1	4	0.856946	0.141924	0.0837471	Dnmt1	4	2.41316	0.0120602	0.00230183	Hsd17b10	10	0.393083	0.674084	0.400589	Ndufs1	27	0.416584	0.152173	0.030131						LARP7		DHX16
Pds5b	3	3.46894	6.91011e-05	1.93456e-05	Zfr	5	0.849545	0.200817	0.12894	Zfr	5	1.56297	0.0669343	0.0275017	Nup93	4	0.392994	0.363938	0.0750935	Znf260	3	0.415188	0.826589	0.6949						MRPL24		SMARCA5
Rbm27	2	3.46021	1.32685e-05	2.89349e-06	Gnl3	3	0.84491	0.806035	0.757302	Gnl3	3	2.66627	0.29628	0.187011	Tra2b	26	0.392684	0.209449	0.0190694	Afg3l1	3	0.409735	0.138777	0.0251063						RNASEK		SPAG9
Tra2b	8	3.45465	2.5096e-05	5.97339e-06	Rpl19	4	0.842263	0.160866	0.0990196	Rpl19	4	-1.75592	0.0358282	0.0118705	Prpf4	7	0.392331	0.388383	0.086039	Dhrs4	4	0.408838	0.0819351	0.00766594						PELO		URB1
FAM120A	11	3.45249	2.00645e-05	4.52055e-06	Rpl32	2	0.827489	0.168987	0.105234	Rpl32	2	-0.571624	0.292283	0.182721	Zc3h4	6	0.389599	0.424559	0.115405	Rpl35	12	0.404675	0.276399	0.0998454						QARS		SIPA1L3
Nfib	2	3.45107	2.38843e-05	5.61137e-06	Eif6	2	0.797766	0.154343	0.093875	Eif6	2	1.79283	0.0356735	0.0117761	Snrnp27	3	0.389323	0.760265	0.532024	Prpf31	10	0.404325	0.102494	0.0120453						IPO4		ZFC3H1
Tollip	2	3.43728	7.81661e-05	2.23197e-05	Sart1	7	0.783974	0.398462	0.307399	Sart1	7	1.33124	0.32005	0.207046	Smc2	13	0.388961	0.51642	0.177892	Mrps36	3	0.404107	0.113076	0.015643						CAPRIN1		LCMT2
Chd4	6	3.42953	3.22936e-05	7.93723e-06	Hsd17b12	4	0.772909	0.297438	0.209681	Hsd17b12	4	3.19996	0.00633368	0.000749222	Ergic1	4	0.3878	0.581652	0.267037	Ndufa12	4	0.403057	0.334779	0.136858						CAPRIN2		AQR
Tecr	5	3.42641	7.4498e-05	2.10031e-05	Toe1	4	0.76893	0.322351	0.23426	Toe1	4	0.460943	0.607835	0.499792	Mrps7	3	0.387064	0.769018	0.547427	Agap1	2	0.401848	0.440372	0.22273						PNLDC1		MAPKBP1
Ddx39b	2	3.4207	4.27078e-06	8.18138e-07	Ank2	5	0.767713	0.863152	0.822864	Ank2	5	2.27041	0.109417	0.053422	Gldc	4	0.386784	0.50371	0.165878	Rps25	16	0.401133	0.174868	0.0422223						PARN		KDM1A
Bclaf1	28	3.42003	2.03217e-05	4.62746e-06	Rbm42	3	0.765954	0.303921	0.215721	Rbm42	3	0.212884	0.672367	0.572366	Atp5l	4	0.38487	0.283388	0.0337893	Khdrbs1	13	0.400229	0.100241	0.0115229						TIAL1		HBP1
Rps17	2	3.41597	5.60148e-05	1.50061e-05	Dazap1	10	0.753372	0.474083	0.379495	Dazap1	10	0.078086	0.972609	0.964377	Ctnnd1	11	0.381284	0.359818	0.068938	Slc1a2	7	0.398764	0.108744	0.0139463						TIA1		SYNCRIP
Tubb2a	2	3.40481	0.00011307	3.38358e-05	Nudt21	3	0.75265	0.874213	0.835723	Nudt21	3	0.980146	0.953831	0.92615	Rfc4	5	0.380071	0.319838	0.0476084	Mrps15	3	0.398347	0.168195	0.039334						CDC40		CDC40
Rbm39	2	3.3969	0.00025498	8.81678e-05	Hmgn1	2	0.752094	0.261674	0.179723	Hmgn1	2	-2.14479	0.437111	0.315545	Adnp	2	0.379473	0.903657	0.772418	Uqcrc1	19	0.396791	0.115428	0.0171493						ZNF598		RANBP6
Rpl32	3	3.39511	4.6216e-05	1.19716e-05	Fxr2	5	0.745371	0.384979	0.293739	Fxr2	5	1.86694	0.0539014	0.0205307	Polr2b	8	0.378677	0.209449	0.0188596	Mrpl16	4	0.396785	0.226846	0.0698406						RCL1		TDRD6
Acsbg1	4	3.39479	0.000414804	0.000160424	Prpf6	5	0.738364	0.313482	0.225541	Prpf6	5	1.58356	0.0548457	0.0211557	Sec11a	3	0.378674	0.363938	0.0731258	Hnrnph1	22	0.39667	0.0680732	0.00502826						RTCA		CCNT1
Gatad2a	6	3.39269	3.02922e-05	7.40881e-06	Camk2b	5	0.736337	0.205872	0.133431	Camk2b	5	2.00919	0.014718	0.00320343	Lsm14a	9	0.37826	0.385807	0.084625	Letm1	6	0.395417	0.149724	0.0283666						MRPL38		BUB1B
Ddost	3	3.38927	0.00025162	8.67027e-05	Psmc4	2	0.73243	0.766712	0.708305	Psmc4	2	-0.00657806	0.806608	0.724744	Cirbp	9	0.376957	0.356807	0.0660941	Aifm1	2	0.394968	0.255374	0.0860341						ADAT2		EIF4E2
Safb2	4	3.38199	4.77884e-05	1.24941e-05	Spats2l	7	0.717227	0.0739057	0.0354783	Spats2l	7	2.68359	0.0056175	0.000570313	Ndufa13	3	0.376506	0.565457	0.240363	Ndufs4	4	0.394691	0.272447	0.095861						BOP1		CCNT2
Cdkn2aip	3	3.3793	2.31705e-05	5.38783e-06	Acat1	3	0.711975	0.550523	0.45533	Acat1	3	3.62564	0.0120761	0.00234113	Cyp20a1	3	0.376287	0.625124	0.331862	Mrrf	3	0.394005	0.524921	0.306578						U2SURP		DIAPH1
Srsf1	14	3.37486	2.80634e-05	6.76226e-06	Dhx9	36	0.7024	0.310078	0.221966	Dhx9	36	2.20279	0.0188029	0.00468367	Ranbp2	7	0.375625	0.765604	0.53823	Cspg5	2	0.393165	0.102952	0.0121724						DUS3L		KLHL41
Timm50	2	3.37321	8.34802e-05	2.40124e-05	Smc1a	14	0.700763	0.0949398	0.0498233	Smc1a	14	1.0111	0.105003	0.0500255	Hist1h2bc	12	0.375026	0.298274	0.0387396	Grm5	3	0.392987	0.113216	0.0163832						CSTF3		CTNND1
Tra2a	5	3.36934	8.59418e-05	2.497e-05	Rpl37a	2	0.691867	0.226387	0.150559	Rpl37a	2	0.47741	0.344386	0.226953	Fyttd1	14	0.373184	0.378047	0.0815658	Atp5h	12	0.392398	0.190958	0.0501878						SRSF11		EIF1B
Rpl10	9	3.36913	0.000143662	4.53174e-05	Pak1ip1	10	0.691046	0.657482	0.568439	Pak1ip1	10	1.66396	0.141387	0.0737201	Arhgap18	4	0.372724	0.969637	0.920088	Acad9	5	0.392088	0.122836	0.0201034						SREK1		USO1
Atp6v1b2	2	3.36715	0.00245152	0.00147978	Atp5h	3	0.662642	0.67841	0.598018	Atp5h	3	2.13184	0.0669343	0.0274342	Fxr2	15	0.37002	0.502924	0.163359	Rdx	15	0.391143	0.363955	0.155796						POLR1E		ZNF354A
Xrn2	6	3.3648	8.34802e-05	2.40383e-05	G3bp1	8	0.661498	0.201273	0.12972	G3bp1	8	1.43928	0.0773986	0.0334987	Polr2a	18	0.369909	0.686664	0.418626	Samm50	2	0.390876	0.115428	0.0172441						EXOSC7		MRPS14
Mtatp8	2	3.35426	0.000141726	4.43962e-05	Eif4a1	6	0.642479	0.56644	0.476028	Eif4a1	6	0.542072	0.301951	0.191686	Ndufa9	12	0.368887	0.209449	0.0180636	Dpy19l1	2	0.390686	0.383334	0.169365						EXOSC8		HNRNPCL1
Flnb	7	3.35177	0.000691528	0.00029744	Rps15a	7	0.641064	0.211547	0.137734	Rps15a	7	2.0044	0.0490103	0.0182529	Mic13	5	0.368125	0.934779	0.835263	Rpl8	19	0.385673	0.119529	0.0185594						EXOSC9		PQBP1
Lsm12	2	3.3513	3.97136e-05	1.00002e-05	Serpine2	2	0.640566	0.1341	0.0785328	Serpine2	2	2.02971	0.0138986	0.00292425	Srgap3	2	0.365323	0.515917	0.177221	Rps3a	38	0.385588	0.0725963	0.00608103						MRPL12		DKC1
Upf1	4	3.31644	0.000130423	4.05442e-05	Metap2	3	0.635838	0.401538	0.310743	Metap2	3	1.61811	0.109417	0.0534517	Dlst	9	0.36344	0.269491	0.0283407	Dnajc9	2	0.383596	0.48518	0.267126						RPS28		EIF5B
Lsamp	2	3.30976	0.000260322	9.06422e-05	Srsf2	6	0.635345	0.415519	0.32307	Srsf2	6	0.906877	0.0773986	0.0334032	Nrxn1	7	0.362069	0.684273	0.415825	Aldh18a1	7	0.382629	0.10435	0.0127094						TEFM		EDF1
Ctnnd1	9	3.30914	6.20297e-05	1.71142e-05	Eftud2	7	0.626013	0.222755	0.147606	Eftud2	7	1.65013	0.0349606	0.011414	Ndufa4	7	0.361874	0.39759	0.0917082	Tmed1	3	0.379086	0.151206	0.0292942						RPL12		KIN
Rbmx	2	3.30487	4.98403e-05	1.32107e-05	Rps15	2	0.600605	0.328407	0.241838	Rps15	2	1.66265	0.0412992	0.0142657	Hmgb3	6	0.360058	0.349073	0.0595512	Znf787	3	0.378726	0.28847	0.10857						ZC3H3		BRD4
Myl12b	7	3.29091	0.000118883	3.62379e-05	Nat10	5	0.570952	0.860663	0.819034	Nat10	5	2.76649	0.0510978	0.0192775	Sf1	17	0.359008	0.274445	0.0300357	Cdk5rap3	2	0.37857	0.138777	0.025049						EIF6		RNASEH1
Phb	4	3.28987	0.000190385	6.29695e-05	Hnrnpab	32	0.558353	0.61103	0.520154	Hnrnpab	32	1.13645	0.376237	0.256382	Ranbp9	2	0.357855	0.895561	0.751915	Ndufb4	5	0.378135	0.0991483	0.011299						NELFE		NOL3
Capzb	21	3.28766	0.000143662	4.54525e-05	Emg1	3	0.54975	0.767353	0.709825	Emg1	3	2.72881	0.0116622	0.00210892	Uqcrh	2	0.356146	0.33984	0.0545095	Rpf2	3	0.377078	0.134403	0.0235539						EIF2B3		RNGTT
Ewsr1	4	3.26919	0.000283202	0.000101339	Rps25	7	0.536755	0.1341	0.0783729	Rps25	7	1.30914	0.0577793	0.0226366	Atp5i	5	0.353448	0.324146	0.0496916	Ppib	2	0.374854	0.276399	0.0994456						APOBEC2		MITF
Cep131	6	3.26504	4.81883e-05	1.27147e-05	Trmt2a	8	0.520913	0.698282	0.618912	Trmt2a	8	0.979007	0.824019	0.749289	Mrpl14	4	0.351029	0.319838	0.0452629	Rcc2	11	0.373703	0.408673	0.197059						APOBEC3H		NOS1AP
Caprin1	10	3.25146	7.60915e-05	2.1544e-05	Oat	2	0.518694	0.67841	0.597918	Oat	2	0.833344	0.834658	0.76375	Ankrd17	5	0.347726	0.721992	0.455024	Atp1b1	3	0.372755	0.165398	0.0376101						APOBEC3F		DENND4B
Eprs	4	3.24455	0.000143983	4.57971e-05	Rpl27a	4	0.509601	0.275744	0.192054	Rpl27a	4	1.56657	0.025689	0.00739702	Rps7	25	0.344216	0.507416	0.172645	Sh3pxd2b	6	0.372577	0.443869	0.229838						APOBEC3G		N4BP1
Eif3i	2	3.22808	0.00014528	4.65595e-05	Myef2	20	0.509407	0.286353	0.200482	Myef2	20	2.39922	0.0172443	0.0039935	Ogdh	17	0.344072	0.185416	0.0117927	Osbpl8	2	0.372028	0.16077	0.0336825						APOBEC1		ROCK2
Srsf5	4	3.21679	0.000797373	0.000350652	Lrrc59	2	0.508624	0.270132	0.187492	Lrrc59	2	2.74609	0.0104699	0.00182306	Hnrnpu	65	0.343784	0.343884	0.0561344	Hexb	10	0.370073	0.14669	0.0271716						ZC3H7A		CLASP2
Snu13	2	3.21558	0.000357196	0.00013168	Srgap2	2	0.505317	0.951353	0.938699	Srgap2	2	-2.16392	0.391161	0.273057	Pfkm	12	0.341695	0.357526	0.0667348	Gnai2	17	0.36987	0.383334	0.169426						ZC3H7B		PTCD1
Rpl24	10	3.2075	0.000148025	4.7796e-05	Ddost	2	0.499006	0.254052	0.173259	Ddost	2	0.90698	0.0904909	0.0407045	Mrm3	3	0.341448	0.507416	0.172385	Ndufv2	4	0.367812	0.264041	0.0908486						NOP9		ASTN2
Srsf9	7	3.20617	0.000116497	3.52298e-05	Capza2	4	0.485832	0.724064	0.654022	Capza2	4	1.49842	0.625624	0.518958	Cnp	5	0.337043	0.320485	0.048448	Hist1h3a	8	0.36587	0.267552	0.0936688						PQBP1		CPNE3
Erbin	2	3.20096	1.17483e-05	2.53366e-06	Rps28	4	0.457998	0.310554	0.222683	Rps28	4	0.424178	0.377263	0.258656	Rps2	21	0.336434	0.416628	0.107336	Rps13	10	0.365617	0.15172	0.0299334						PATL2		RNF40
Paics	3	3.19974	0.000271648	9.54897e-05	Canx	7	0.406049	0.46999	0.375082	Canx	7	2.5705	0.0078141	0.0010719	Gpt2	4	0.336307	0.352007	0.0616619	Cct4	19	0.365083	0.162263	0.035596						PATL1		ZC3H11A
Gnb1	3	3.1981	0.000390631	0.000148722	Rps2	5	0.400097	0.687948	0.607258	Rps2	5	1.10661	0.204945	0.116474	Mtco2	3	0.333493	0.320485	0.0483088	Eef1a1	37	0.363555	0.301791	0.115644						EDC3		CLUH
Rbm14	20	3.19731	0.000143662	4.55217e-05	Rps14	8	0.399011	0.720884	0.649406	Rps14	8	1.53794	0.0662057	0.0268185	Stt3a	11	0.332792	0.60258	0.300047	Grsf1	2	0.362783	0.515211	0.296078						WBP4		NPHP4
Lrrc59	3	3.196	0.00075479	0.000329197	Aimp1	4	0.395835	0.359834	0.270202	Aimp1	4	-0.890666	0.230665	0.135376	Dap3	4	0.332785	0.581652	0.267915	Fam98b	13	0.362733	0.148068	0.0277364						GLTSCR2		CNOT3
Alyref	8	3.19206	4.21813e-05	1.07459e-05	Fus	8	0.394485	0.246141	0.166971	Fus	8	0.965014	0.170644	0.0918419	Mrpl46	3	0.330663	0.565457	0.238917	Ermp1	8	0.362498	0.302328	0.116065						RPS18		ANKRD17
Srsf4	5	3.18591	0.000111634	3.32213e-05	Eif3a	7	0.393662	0.439463	0.349121	Eif3a	7	1.19657	0.0652499	0.0260368	Rtcb	23	0.329486	0.508473	0.173942	Ppan	2	0.359534	0.833171	0.702632						ASCC1		GGCT
Myl6	13	3.18404	0.000119355	3.65256e-05	Trim56	2	0.386884	0.178993	0.113197	Trim56	2	1.10532	0.292701	0.183336	Cdc42ep1	4	0.328572	0.584944	0.278565	Rps26	5	0.359325	0.113076	0.0152546						EIF5A		ZNF780A
Prc1	2	3.17857	0.000190385	6.30793e-05	Chd4	6	0.362502	0.484407	0.389152	Chd4	6	1.26836	0.0972139	0.0451392	Hadha	54	0.327801	0.274858	0.0305168	Dock7	3	0.359138	0.47751	0.257461						EIF5A2		GADD45B
Sfxn1	4	3.16619	0.000224884	7.61353e-05	Rpl18a	7	0.361375	0.37328	0.282501	Rpl18a	7	0.95916	0.53525	0.421803	Cox6c	4	0.325962	0.209449	0.0191402	Usp39	3	0.355443	0.328477	0.131484						EIF5AL1		DUSP11
Pspc1	7	3.1655	0.000280424	0.000100007	Smc3	11	0.358642	0.793477	0.742625	Smc3	11	0.00684397	0.923009	0.873901	Hdac2	2	0.325565	0.723325	0.465081	Fen1	10	0.354451	0.157791	0.0327046						MRPL47		NIPSNAP2
Rps2	12	3.16448	0.000645086	0.00027047	Myo18a	2	0.347684	0.484407	0.389517	Myo18a	2	1.72206	0.0173367	0.00419266	Snrpd2	12	0.323398	0.560159	0.22775	Hnrnph2	8	0.349982	0.344878	0.142225						BOLL		SNN
Eef2	2	3.16438	0.00075479	0.000328785	Rps11	8	0.347651	0.28913	0.202776	Rps11	8	-0.227354	0.489061	0.370788	Atp5f1	11	0.322035	0.51642	0.178249	Srp68	7	0.349913	0.726554	0.556301						DAZL		TBCA
Fmr1	3	3.1371	8.38084e-05	2.42338e-05	Atp2a2	4	0.347493	0.555251	0.459912	Atp2a2	4	2.0516	0.0474432	0.0173251	Sfpq	53	0.322	0.540157	0.199736	Mrpl12	2	0.349417	0.122836	0.0201227						DAZ1		H2AFY
Ftsj3	2	3.13131	6.26745e-05	1.73676e-05	Cirbp	8	0.340183	0.720884	0.649034	Cirbp	8	0.607169	0.272444	0.167683	Magohb	5	0.318842	0.319838	0.0468216	Atp1a2	49	0.348649	0.151206	0.0292376						DAZ2		FLNB
Cdc42ep1	2	3.12964	0.000670165	0.000283407	Rpl35	3	0.339061	0.606173	0.514551	Rpl35	3	-0.462701	0.63923	0.535655	Cep170	3	0.313448	0.967044	0.912683	Pdha1	11	0.348519	0.16077	0.0345885						DAZ3		NDUFS6
Rab10	3	3.12592	0.000249558	8.56914e-05	Eif3i	3	0.320122	0.896208	0.862613	Eif3i	3	1.55495	0.245807	0.148911	Rps15	9	0.311846	0.305274	0.0410087	Rps8	17	0.346503	0.145597	0.0267551						DAZ4		TRIM3
Hip1	3	3.1222	0.000426995	0.000166168	Msi2	2	0.313739	0.714459	0.637571	Msi2	2	1.36918	0.048783	0.0180503	Anp32e	4	0.31161	0.628946	0.338263	Aco2	17	0.346265	0.0964839	0.0106517						INTS1		CS
Sugp2	2	3.11616	0.0110286	0.00930125	Mars	5	0.295285	0.793151	0.741361	Mars	5	0.642661	0.437699	0.317027	Rbm42	3	0.307317	0.671962	0.397263	Mrps7	3	0.345551	0.210918	0.0611421						RPLP1		MRPL33
Atp2a2	5	3.11268	0.000528212	0.000213194	Psmd14	2	0.285669	0.992769	0.992769	Psmd14	2	2.71604	0.156406	0.0828363	Ythdc1	10	0.305403	0.397875	0.0923387	Gpnmb	2	0.34401	0.184581	0.0469341						MRPS11		PRPF40A
Pes1	2	3.11126	0.00106489	0.000501655	Prdx2	5	0.269626	0.746193	0.681228	Prdx2	5	1.26239	0.622099	0.515281	Ndufc2	2	0.305014	0.50371	0.164919	Phf6	10	0.342522	0.12273	0.0198597						WDR43		NME6
Sgpl1	3	3.1061	0.000825797	0.000365056	Nop56	10	0.264741	0.461722	0.367368	Nop56	10	2.31882	0.0131542	0.00265629	Timp3	2	0.30477	0.272641	0.0292202	Rps15	8	0.339455	0.184581	0.046709						TRMT112		GIGYF1
Srrt	2	3.09469	0.000130423	4.06982e-05	Snrnp70	3	0.258919	0.855687	0.81223	Snrnp70	3	2.05355	0.257916	0.157494	Hnrnpul1	25	0.304128	0.438517	0.125243	Oat	4	0.338471	0.108734	0.0136305						PPP1R8		ERN1
Trim28	2	3.08282	0.000403921	0.000154755	Ddx21	22	0.245252	0.720487	0.645563	Ddx21	22	1.54351	0.677898	0.580353	Sart3	26	0.303538	0.455862	0.134591	Fundc2	2	0.337873	0.143369	0.0262435						FBXO17		ZNF324
Rpn1	5	3.08074	0.000391027	0.000149344	Eif1b	2	0.234582	0.958517	0.949245	Eif1b	2	-0.245961	0.597051	0.485149	Rpl22	10	0.303038	0.385807	0.0844661	Atp1b2	6	0.337023	0.959591	0.925417						MTHFSD		PSIP1
Lmnb1	13	3.07753	0.000564209	0.000230442	Nsun2	7	0.196879	0.775532	0.721141	Nsun2	7	0.183819	0.502851	0.382459	Msh2	5	0.302917	0.767177	0.543219	Cdc42ep1	5	0.335939	0.566547	0.357119						SON		SRSF10
Phgdh	5	3.06588	0.000677817	0.00028746	Dars	10	0.196661	0.42699	0.336635	Dars	10	-0.663761	0.999476	0.998144	Slc25a4	16	0.30216	0.417494	0.109337	Ndufa9	13	0.335561	0.118159	0.0182625						SPATS2L		KHDRBS3
Eif4g1	9	3.05539	0.000284532	0.000102157	Eprs	11	0.19665	0.633085	0.543519	Eprs	11	-0.637596	0.362058	0.24429	Cox7a2	2	0.301684	0.332531	0.0519211	Rrp9	2	0.335483	0.383819	0.173593						SPATS2		RBMXL2
Cpsf7	3	3.05435	0.000150479	4.87697e-05	Rpl11	9	0.190381	0.925231	0.904489	Rpl11	9	0.677347	0.2135	0.122627	Eef1d	10	0.301581	0.332939	0.052221	Snrnp27	3	0.333202	0.191089	0.0508245						MAEL		EED
Cltc	3	3.05046	9.15255e-05	2.6796e-05	Actr2	2	0.176065	0.730607	0.664349	Actr2	2	-0.318483	0.955221	0.930965	Atad3	13	0.299703	0.923415	0.802827	Gstp1	2	0.331813	0.818023	0.683494						RRP1B		SF3B1
Myh14	53	3.04935	0.000411332	0.000158398	Tpt1	2	0.168829	0.60363	0.511662	Tpt1	2	0.0417247	0.955632	0.934832	Ddx21	52	0.298708	0.359818	0.0681144	Ndufc2	2	0.331638	0.193259	0.0523812						RRP1		CSDE1
Trip12	4	3.048	0.000357196	0.000131689	Hnrnph2	5	0.149462	0.42644	0.334655	Hnrnph2	5	2.03769	0.0586293	0.0231114	Mrps15	4	0.298668	0.595032	0.288014	Rps11	23	0.330821	0.0908348	0.00933651						ZC3HAV1		WBP4
Rps27a	7	3.04195	0.000224884	7.60087e-05	Nxf1	7	0.139397	0.426913	0.336059	Nxf1	7	1.32883	0.0504341	0.0189095	Hsdl2	6	0.2979	0.655913	0.365516	Srsf5	11	0.327866	0.142648	0.025998						PARP12		SKAP2
Rps3	20	3.03883	0.0012443	0.000608658	Ddx1	12	0.13631	0.709652	0.631565	Ddx1	12	0.620185	0.640897	0.538602	Rexo4	4	0.297179	0.359818	0.0692056	Pgrmc2	2	0.327213	0.162263	0.0354157						TIPARP		PRKRA
Copa	3	3.03066	0.000206986	6.95772e-05	Eif2s3x	5	0.13618	0.854106	0.809697	Eif2s3x	5	-0.230044	0.983363	0.977418	Astn1	2	0.295911	0.677206	0.405651	Reep5	3	0.327124	0.750364	0.594178						MRPS17		MTRF1
Iqgap1	5	3.02952	0.000288818	0.00010422	Csde1	17	0.126954	0.901688	0.877496	Csde1	17	-1.64998	0.0196195	0.00495825	Rpl26	21	0.293821	0.584061	0.271269	Slc25a1	10	0.326545	0.158256	0.0329137						U2AF2		PGLYRP1
Atp1a2	13	3.01248	0.000444844	0.00017365	Gtf2e2	3	0.108379	0.724069	0.655777	Gtf2e2	3	1.03322	0.504419	0.384261	Tra2a	9	0.292639	0.60258	0.297015	Ranbp1	2	0.326464	0.40675	0.195293						UHMK1		GCM2
Thoc2	6	3.0114	0.000249558	8.56309e-05	Septin 11	3	0.101298	0.991777	0.989379	Septin 11	3	1.53716	0.0236852	0.00661581	Ndufv2	3	0.290838	0.361592	0.0718565	Mrpl14	4	0.325329	0.157791	0.0326361						NUP153		NPM3
Slc25a3	3	3.00515	0.000689059	0.000294718	Eif5	3	0.0943831	0.358827	0.268144	Eif5	3	-1.66683	0.185599	0.102113	Zfp2	3	0.288925	0.995273	0.967489	Ddx27	2	0.323521	0.247994	0.0814282						CSDE1		LYPLA1
Thrap3	25	2.99932	0.000238715	8.13931e-05	Ddx18	7	0.0921302	0.767489	0.710879	Ddx18	7	1.80656	0.0276333	0.00838689	Maoa	14	0.288295	0.302454	0.0394972	Rpl23a	18	0.322234	0.113076	0.0159238						POLR2L		ERAL1
Cdh11	4	2.99459	0.000191344	6.38582e-05	Api5	2	0.0854692	0.720884	0.647056	Api5	2	0.444787	0.666015	0.563737	Tmed2	4	0.286024	0.501074	0.161809	Lgals1	5	0.321827	0.505162	0.283137						NKRF		SNRNP200
Larp4	3	2.99287	0.00047265	0.000187921	Ubap2l	2	0.0852577	0.660049	0.572255	Ubap2l	2	-0.637276	0.359314	0.24171	Pgrmc1	6	0.285582	0.349073	0.0587139	Ndufs8	5	0.321206	0.31398	0.123221						MRPL48		TRMU
Rps9	10	2.98185	0.000689059	0.00029435	Vdac2	4	0.0807519	0.747094	0.684761	Vdac2	4	0.437737	0.848192	0.782552	Alg2	2	0.284291	0.635419	0.344542	Maz	2	0.320961	0.480154	0.260009						XRCC6		SURF6
Mpdz	5	2.98095	0.000563896	0.000229635	Ddx3x	21	0.0743967	0.889992	0.854478	Ddx3x	21	0.963249	0.105438	0.0504533	Uqcr10	2	0.283736	0.565457	0.242883	Ddx47	3	0.319215	0.231439	0.0740142						SUPT5H		UTP20
Sfpq	35	2.97996	0.000362838	0.00013476	Snrnp200	10	0.0563943	0.863152	0.82349	Snrnp200	10	0.455488	0.666226	0.564722	Map2	38	0.281441	0.559571	0.217965	Prpf4b	11	0.319205	0.417139	0.206531						TSR3		WDHD1
Septin 9	2	2.96054	0.00285468	0.00182065	Rpl3	11	0.046837	0.550523	0.455238	Rpl3	11	1.51794	0.0412992	0.0143223	Dhcr7	5	0.281392	0.565457	0.244799	Apex1	15	0.318001	0.175603	0.0428712						XRN2		CRTAP
Nufip2	8	2.95969	0.000184865	6.08049e-05	Tra2b	9	0.0454799	0.758628	0.698085	Tra2b	9	0.167645	0.955632	0.934819	Znf638	9	0.281212	0.560159	0.226357	U2surp	14	0.317505	0.382671	0.16793						RSRC1		RNASEH2A
Pds5a	3	2.95876	5.6461e-05	1.52377e-05	Ppp1cb	9	0.0389831	0.652561	0.562607	Ppp1cb	9	0.715575	0.231755	0.137315	Ppm1g	2	0.280477	0.674688	0.402706	Fus	10	0.316128	0.457875	0.241656						TDRD5		CDC123
Hdlbp	5	2.95116	0.000753302	0.000326733	Tmpo	2	0.0356639	0.53882	0.439787	Tmpo	2	-3.4873	0.173725	0.0947402	Rbm26	6	0.280001	0.625124	0.33184	Cdk11b	2	0.315243	0.113076	0.0160132						POLR2J		POP7
Camk2b	12	2.9511	0.00046978	0.000184868	Rpl7a	8	-0.00744287	0.717619	0.641258	Rpl7a	8	1.29123	0.0403485	0.0137585	Metap2	5	0.279388	0.72631	0.471033	Hist1h1b	14	0.314513	0.198389	0.0555032						POLR2J2		RPP40
Parp1	3	2.94495	0.000191344	6.37082e-05	Dhx15	14	-0.0114315	0.949767	0.935985	Dhx15	14	0.486887	0.230665	0.135578	Zfp37	11	0.278252	0.417494	0.109335	Rpl6	23	0.314502	0.127615	0.0215418						POLR2J3		ZNF189
Srsf6	10	2.94124	0.000264016	9.22466e-05	Sub1	2	-0.011774	0.901688	0.877523	Sub1	2	0.26458	0.706261	0.613175	Hnrnpl	49	0.277705	0.365639	0.0768127	Tm9sf3	4	0.314201	0.718065	0.544175						SAFB2		EIF3G
Rpl11	7	2.93593	0.000617554	0.000256694	Rpl13	5	-0.0447574	0.421517	0.328753	Rpl13	5	0.449064	0.949518	0.91737	Ccdc124	3	0.277498	0.363938	0.0743248	Nrxn1	7	0.314182	0.265388	0.0918651						SAFB		EIF3J
Slc25a1	2	2.93417	0.00139215	0.00072467	Dek	6	-0.0517938	0.754423	0.693303	Dek	6	-0.36819	0.467788	0.347871	Mrps2	2	0.277234	0.39167	0.0886096	Capzb	2	0.312847	0.654822	0.457069						SLTM		IDH1
Myo1b	30	2.93219	0.00156677	0.000845679	Rps8	9	-0.0607303	0.938	0.923255	Rps8	9	0.861269	0.189179	0.105455	Ddx1	37	0.276826	0.361235	0.070004	Ednrb	2	0.308917	0.19513	0.0534263						BRIX1		GATB
Rps4x	13	2.93071	0.00132574	0.000680438	Prpf8	5	-0.0616264	0.957749	0.947326	Prpf8	5	0.248943	0.923009	0.870082	Dclk1	6	0.276627	0.635419	0.344158	Psmc2	9	0.3073	0.383334	0.170644						POLR2I		PAK3
Rpl36	3	2.92408	0.000371858	0.000138887	Ddx6	5	-0.0716021	0.714459	0.636891	Ddx6	5	0.0920168	0.679983	0.58296	Mogs	3	0.276016	0.445219	0.129869	Decr1	8	0.306902	0.562885	0.350149						PWP2		RGS9
Dhx30	3	2.92397	0.000378297	0.000142278	Rpl34	2	-0.0790684	0.736911	0.671863	Rpl34	2	-0.67364	0.230665	0.136391	Pnn	13	0.274952	0.754141	0.516498	Itpr2	11	0.30615	0.232274	0.0744467						ELAC2		BCAS2
Nono	25	2.92286	0.000495606	0.000197645	Srsf9	6	-0.116795	0.754423	0.692453	Srsf9	6	1.01359	0.303299	0.193131	Eef1a1	37	0.2739	0.314955	0.043812	Dek	9	0.305885	0.113076	0.0162628						ZCCHC14		SMNDC1
Pard3b	3	2.92213	0.000520479	0.000209446	Rpl15	4	-0.121205	0.60308	0.510467	Rpl15	4	1.64486	0.0678354	0.0280529	Scaf1	3	0.273336	0.46839	0.147251	Srsf9	13	0.305174	0.16077	0.0339592						ZCCHC2		GLRX3
Myh9	192	2.92029	0.000357826	0.000132352	Fermt2	2	-0.124615	0.61205	0.52324	Fermt2	2	2.50938	0.157756	0.0840938	Nxf1	22	0.272682	0.540157	0.20082	Ssr4	7	0.304615	0.205484	0.0591279						LARS		RSL1D1
Arpc4	6	2.92021	0.00576283	0.00434642	Rpl21	2	-0.13951	0.549052	0.452785	Rpl21	2	-0.345791	0.603299	0.494603	Mest	10	0.270301	0.458434	0.136652	Wnk1	2	0.304518	0.706328	0.527338						MRPL28		SRP72
Lmna	7	2.91594	0.0031168	0.00205256	Rps20	4	-0.14012	0.962714	0.95573	Rps20	4	-2.79247	0.0311181	0.0099337	Ndufs1	29	0.270157	0.531665	0.189827	Mlec	10	0.303655	0.180627	0.0448993						CNOT1		OR7C1
Frmd4a	3	2.91346	0.000910183	0.000413421	Rpl10a	7	-0.145576	0.309019	0.220087	Rpl10a	7	0.718736	0.950141	0.91912	Tmem35a	2	0.268496	0.532582	0.193472	Slc39a7	2	0.303488	0.195638	0.0540652						DDX18		DXO
Cox6c	2	2.91276	0.00130476	0.000664524	Marcks	3	-0.150512	0.566425	0.475331	Marcks	3	-0.642954	0.778379	0.693515	Glyr1	23	0.267838	0.671255	0.393159	Ddost	12	0.301567	0.134403	0.0234373						TSEN15		RECQL5
Actr2	9	2.91269	0.00253688	0.00156463	Rtn4	2	-0.151117	0.884178	0.846759	Rtn4	2	0.97578	0.121558	0.0612994	Drg2	3	0.265987	0.531665	0.189055	Eif3g	3	0.30151	0.530671	0.314632						USP10		URI1
Prrc2c	12	2.90684	0.0010987	0.000520229	Snd1	13	-0.152224	0.638845	0.550009	Snd1	13	0.810973	0.209061	0.119572	Sap18	9	0.265641	0.46839	0.147265	Tmx2	7	0.300752	0.127885	0.0216784						SMNDC1		STK10
Rpl18a	15	2.90196	0.000383288	0.000145003	Mdh1	3	-0.166542	0.362342	0.272962	Mdh1	3	1.04498	0.437738	0.317585	Slc25a11	9	0.265593	0.723325	0.465295	Eif2s2	13	0.300063	0.276399	0.100205						THUMPD2		NOL4
Coro2b	18	2.90155	0.000319353	0.000116583	NA	5	-0.170534	0.699926	0.000168485	NA	5	-0.546859	0.32005	0.0186283	Btf3	7	0.26495	0.560159	0.232688	Api5	8	0.298644	0.234954	0.0754733						THUMPD3		IPO13
Nudt21	3	2.90041	0.000472122	0.000187142	Hnrnpul2	8	-0.186526	0.874213	0.836158	Hnrnpul2	8	-0.119861	0.481469	0.362703	Acox1	17	0.263549	0.414894	0.10366	Llgl1	17	0.295819	0.383819	0.173372						SND1		SEC24D
Purb	4	2.89923	0.000278003	9.84732e-05	H2afx	6	-0.194319	0.397865	0.306457	H2afx	6	0.693768	0.525869	0.408907	Ncln	15	0.260693	0.565457	0.241393	Mcm3	19	0.295517	0.164975	0.036834						LSM4		SORBS2
Eef1d	2	2.89248	0.000911423	0.000415082	H2afy	3	-0.217956	0.930834	0.915076	H2afy	3	1.38133	0.171912	0.093186	Nedd4	2	0.259231	0.743464	0.49916	Tmem120a	2	0.294497	0.28847	0.108606						EIF3M		FARP2
Smarca5	6	2.89213	0.000415477	0.000161185	Btf3	3	-0.218784	0.581041	0.489705	Btf3	3	0.31193	0.684762	0.589541	Hmgn1	9	0.256843	0.540157	0.198849	Hist1h4a	15	0.294163	0.203522	0.0579835						MRPL34		PRPF6
Slc25a5	17	2.8846	0.00130476	0.000661037	Map2	14	-0.226166	0.897126	0.865573	Map2	14	-0.964578	0.134938	0.0696719	Acaa1a	5	0.256736	0.821539	0.619879	Hnrnpl	22	0.292396	0.218975	0.0659738						SRP72		PCF11
Smc3	4	2.88319	0.00096404	0.00044369	Sars	5	-0.235236	0.89894	0.870678	Sars	5	0.691188	0.514096	0.396606	Nomo1	30	0.256343	0.722212	0.455757	Pgam5	9	0.292342	0.162263	0.0352467						SUGP1		GLS
Smc4	3	2.87457	0.000311796	0.000113073	Rtcb	11	-0.237482	0.245441	0.166199	Rtcb	11	-0.259586	0.446889	0.326241	Srsf5	14	0.255976	0.414828	0.100539	Suclg2	4	0.292155	0.2356	0.0758485						SUGP2		SEC31A
Dnajb12	2	2.87239	0.000104982	3.09886e-05	Copb2	2	-0.251902	0.497392	0.401763	Copb2	2	1.28786	0.248638	0.150927	Rpa1	5	0.255354	0.911351	0.786518	Vdac3	18	0.291997	0.185563	0.0474481						RPS3		HEXIM1
Rpl35a	9	2.87229	0.000500546	0.000200821	Rpl22	6	-0.263972	0.925231	0.905093	Rpl22	6	2.3022	0.0311149	0.00985745	Rbm28	4	0.254369	0.760265	0.531001	Rrs1	2	0.291824	0.226846	0.0701193						RPS27A		RPP14
Wdr1	8	2.87155	0.0017093	0.000937023	Rps24	4	-0.266606	0.295645	0.208059	Rps24	4	1.23014	0.106231	0.051253	Map7d1	15	0.253729	0.530408	0.186716	Rpl7	24	0.290001	0.216403	0.0644167						CCAR2		UBR5
NA	2	2.85574	0.000468895	0.931267	Rps13	2	-0.277968	0.54068	0.441959	Rps13	2	-3.196	0.692265	0.597675	Iap	7	0.252691	0.811846	0.610757	Emc4	6	0.289213	0.562885	0.350593						CCAR1		SCAF4
Rps16	12	2.8537	0.0012961	0.000643367	Sart3	3	-0.284313	0.546705	0.449528	Sart3	3	-0.575538	0.421086	0.302449	Nop56	20	0.251753	0.39099	0.0874108	Ilf3	53	0.286682	0.247994	0.0812941						DDX49		DUSP14
Sfxn3	4	2.85286	0.00171439	0.000943948	Hsd17b10	3	-0.294905	0.992769	0.991707	Hsd17b10	3	1.04929	0.0426953	0.0150234	Phb2	18	0.251295	0.366867	0.0775915	Asph	10	0.285982	0.250281	0.0823575						MRPL4		SNUPN
U2af2	2	2.85202	0.000411332	0.000158586	Dhx36	5	-0.314688	0.663122	0.577325	Dhx36	5	-0.162522	0.999476	0.999476	Pcm1	3	0.25085	0.979228	0.935444	Dlst	9	0.284391	0.932747	0.866628						SFSWAP		RTN3
Rpl15	9	2.84956	0.00109129	0.000515404	Srpk2	5	-0.315144	0.723679	0.652799	Srpk2	5	1.60391	0.210979	0.120924	Pigs	3	0.250807	0.589634	0.281216	Hist1h1c	21	0.283712	0.255799	0.0868355						MRPS12		LETM1
Tdrd3	4	2.84755	0.001291	0.00063928	Eef1d	7	-0.319153	0.376271	0.285729	Eef1d	7	1.58325	0.0568043	0.0221173	Cct5	16	0.249158	0.560159	0.231221	Hist1h1d	3	0.283667	0.213234	0.0619655						EIF1		ZRANB2
Pcbp3	3	2.84753	0.00200677	0.00115329	Myl12b	2	-0.329698	0.747094	0.684566	Myl12b	2	0.759485	0.571189	0.45556	Ndufs5	4	0.248707	0.608892	0.313262	Uqcrb	9	0.280938	0.277965	0.101168						EIF1B		LUC7L3
Ranbp2	4	2.84513	0.000591478	0.000243005	Rps4x	18	-0.33215	0.846939	0.800854	Rps4x	18	1.58612	0.0504341	0.0189661	Rcc2	9	0.248691	0.391112	0.0877158	Hnrnpab	24	0.280917	0.510944	0.289955						CLP1		SLC25A14
Rpl10a	9	2.83477	0.000609391	0.000252422	Npm1	11	-0.339186	0.357099	0.265989	Npm1	11	1.22076	0.30403	0.194476	Prps1	2	0.24798	0.769554	0.551371	Idh3g	8	0.280326	0.932747	0.868969						ZMAT5		CELF2
Tubb5	2	2.8304	0.00248693	0.00152212	Eef1a1	31	-0.342705	0.439463	0.349126	Eef1a1	31	1.41184	0.0412992	0.0143324	Xpo1	9	0.247921	0.966086	0.900992	Gpd2	20	0.279395	0.37377	0.16186						SF3B3		PAPSS2
Ubap2l	5	2.82691	0.00038917	0.000147697	Hist1h2ab	3	-0.346059	0.386497	0.295364	Hist1h2ab	3	0.812027	0.117429	0.0590693	Top1	28	0.247396	0.811846	0.61051	Rps19	19	0.27776	0.165398	0.0377228						PLD6		FARS2
Tpgs2	2	2.82424	0.00433706	0.00303594	Rpl31	5	-0.354066	0.562827	0.470187	Rpl31	5	2.06168	0.017617	0.00432437	Eri1	6	0.247352	0.531665	0.188366	Sec61a1	9	0.27637	0.480945	0.262739						QTRTD1		IPO7
Rpl22l1	3	2.81839	0.00129918	0.00064646	Septin 9	11	-0.36292	0.245267	0.165785	Septin 9	11	1.30609	0.059533	0.0235396	Hist1h4a	14	0.246533	0.361235	0.0710504	Bcap31	11	0.275846	0.190587	0.0499544						QTRT1		WISP3
Atp5c1	4	2.81129	0.00143306	0.00075106	Rps3a	13	-0.368508	0.855899	0.813466	Rps3a	13	1.13504	0.0571171	0.0223081	Prdx1	7	0.244306	0.507416	0.171895	Rae1	3	0.274812	0.170422	0.0402993						PIH1D1		SLU7
Srsf2	7	2.80493	0.00120744	0.000584806	U2surp	5	-0.375056	0.779017	0.726266	U2surp	5	-2.50517	0.130168	0.0668811	Kcnj10	4	0.242703	0.566201	0.248341	Ogdh	18	0.274633	0.147109	0.027452						SWT1		CD2BP2
Ncam1	2	2.80299	0.00442618	0.00312499	Uqcrc1	3	-0.375141	0.259104	0.177331	Uqcrc1	3	1.09056	0.292179	0.182303	Prpf38a	5	0.242288	0.684715	0.416952	Acads	5	0.27443	0.487982	0.269363						EXOSC4		BAG4
Ybx3	3	2.80082	0.00181745	0.00101602	Pabpc1	13	-0.380809	0.214621	0.140313	Pabpc1	13	-2.71198	0.00829097	0.00119168	Larp1	4	0.241565	0.540157	0.200201	Lmna	9	0.273545	0.284608	0.105207						EXOSC6		PARN
Mtdh	5	2.786	0.00130476	0.000650885	Eif3h	3	-0.386237	0.302649	0.214452	Eif3h	3	-0.541371	0.4844	0.365497	Dhx30	15	0.24052	0.821539	0.620281	Rpl23	14	0.27181	0.576925	0.367745						PTRH1		FMNL1
Rpl37a	5	2.7854	0.00218759	0.00128356	Cct5	6	-0.395119	0.330246	0.243866	Cct5	6	1.29298	0.32005	0.206808	Clasp1	14	0.240432	0.607648	0.303608	Gtf2b	2	0.271581	0.168195	0.0390506						INTS8		NSA2
Cenpv	5	2.78462	0.00139215	0.000726265	Nfib	3	-0.396298	0.779017	0.725356	Nfib	3	-1.10159	0.834658	0.764011	Hnrnph2	7	0.238591	0.565457	0.245284	Ndufs2	11	0.271442	0.228938	0.0710948						EXOSC10		CBX6
Smarca4	5	2.78446	0.000144865	4.6252e-05	Hist2h2ac	2	-0.399794	0.925785	0.906754	Hist2h2ac	2	0.94404	0.0727827	0.0309789	Dclk2	24	0.238175	0.560159	0.232474	Mrps14	2	0.271357	0.156899	0.03214						CASC3		NADK
Ybx1	14	2.7818	0.000874607	0.000391992	Rpl10	10	-0.403518	0.375591	0.284759	Rpl10	10	0.659726	0.219084	0.126894	Nat10	6	0.238159	0.776218	0.566194	Sec63	14	0.271205	0.730498	0.561922						GTF3A		POLR1A
Slain1	2	2.77977	0.00251619	0.00154306	Hmgb2	8	-0.405946	0.951876	0.940366	Hmgb2	8	-2.11511	0.204945	0.11645	Eif1ax	4	0.236836	0.363938	0.0740875	Gspt1	2	0.27093	0.405192	0.193649						MRPL54		DUS4L
Rpl6	19	2.76786	0.00198286	0.00112501	Bclaf1	4	-0.41253	0.747094	0.683471	Bclaf1	4	1.91792	0.606439	0.49791	Rdx	18	0.235734	0.414828	0.101709	Hist1h1a	7	0.270914	0.672116	0.480317						GTPBP3		ZBTB11
Rps23	7	2.76284	0.00127141	0.000626512	Rplp1	4	-0.425518	0.901688	0.877701	Rplp1	4	1.80006	0.10824	0.0524841	Tardbp	14	0.235271	0.467689	0.142066	Zfp2	3	0.270615	0.885366	0.788884						UBA1		CNOT4
Ddx3x	17	2.76107	0.000825797	0.000365142	Abcd3	3	-0.426854	0.309041	0.220477	Abcd3	3	1.08974	0.078666	0.0345293	Cs	21	0.234128	0.438517	0.124906	Tarbp2	5	0.270283	0.672116	0.48063						LSM12		CPSF4
Rps20	6	2.76081	0.00256454	0.00158507	Map4k4	4	-0.431671	0.653671	0.564354	Map4k4	4	0.183934	0.528721	0.413189	Atxn2l	4	0.231637	0.584061	0.271661	Gnb2	5	0.270254	0.628751	0.431259						HINT3		FGFR1OP
Atp5b	8	2.76063	0.000690125	0.000296006	Srsf6	3	-0.432489	0.678154	0.596152	Srsf6	3	0.901744	0.143065	0.0750786	Cox5a	6	0.230936	0.560159	0.233128	Rpl26	23	0.268793	0.170422	0.0401807						CCDC59		POP4
Rpl19	10	2.7561	0.00134277	0.000695654	Prmt1	4	-0.441486	0.309385	0.221096	Prmt1	4	0.300745	0.916897	0.861462	Prdx6	2	0.230866	0.531702	0.190945	Slc25a11	10	0.268007	0.126658	0.0211999						POLDIP3		OXSR1
Ubap2	2	2.75205	0.00120113	0.00057886	Vdac3	2	-0.44625	0.235876	0.158011	Vdac3	2	0.890811	0.0993183	0.0462365	Cct6a	17	0.229471	0.574778	0.260504	Thyn1	6	0.267269	0.70768	0.530303						RPL32		LDOC1
Rps27	4	2.75153	0.00197226	0.00111445	Khsrp	21	-0.461363	0.588183	0.496435	Khsrp	21	-2.02942	0.0100099	0.00169455	Prkra	12	0.229462	0.74884	0.50649	Sucla2	12	0.266612	0.210272	0.060805						AZGP1		PTBP3
Rps8	19	2.75022	0.00222907	0.00132133	Copa	3	-0.472111	0.430782	0.340146	Copa	3	-0.578429	0.172988	0.0941292	Trp53i11	3	0.228908	0.827143	0.626343	Cct3	28	0.265518	0.176565	0.043261						EMG1		LSM8
Rpl27	11	2.74888	0.000948953	0.00043446	Eif4h	3	-0.504232	0.425667	0.332581	Eif4h	3	1.0393	0.778379	0.69087	Itm2c	3	0.228889	0.540157	0.198979	Trp53i11	3	0.265201	0.205466	0.0589763						C17orf85		DDX58
Ddx18	3	2.74778	0.000874607	0.000391859	Tecr	2	-0.505873	0.330246	0.243991	Tecr	2	0.397815	0.488459	0.36974	Sec62	10	0.228734	0.456363	0.135387	Mrps9	3	0.265116	0.706328	0.527264						N4BP1		STAU1
Pcm1	17	2.74312	0.000797373	0.00035029	Eif1ax	2	-0.509749	0.202971	0.13106	Eif1ax	2	0.25535	0.965275	0.948934	Srsf2	10	0.227432	0.361235	0.0708707	Mrpl1	3	0.26456	0.29975	0.114435						NYNRIN		FADS2
Snrnp70	4	2.73566	0.000651637	0.000274002	Rpl6	10	-0.512595	0.489715	0.394378	Rpl6	10	-0.0216505	0.67595	0.577868	Rps20	9	0.227333	0.760265	0.531271	Pdhb	12	0.264449	0.186688	0.0480017						KHNYN		TRUB2
H2afy	4	2.73454	0.00200358	0.00114904	Fbl	10	-0.513022	0.54129	0.443111	Fbl	10	1.38316	0.0720601	0.0305842	Osbpl8	3	0.227147	0.771438	0.559519	Hnrnpf	14	0.264431	0.16077	0.0342706						NOP2		ECD
G3bp1	8	2.73417	0.00100121	0.000468037	Eef1g	7	-0.517909	0.344474	0.254919	Eef1g	7	-1.90472	0.0972139	0.0450833	Rps24	9	0.226654	0.608459	0.309614	Snrnp70	19	0.264075	0.170482	0.0404349						NSUN4		SYF2
Stau1	3	2.73147	0.000592111	0.000243978	Rpn1	6	-0.529226	0.382186	0.291145	Rpn1	6	1.3362	0.0518205	0.0196755	Ntn1	9	0.225581	0.927844	0.818208	Ergic1	3	0.263277	0.194787	0.0531364						NSUN3		TOP3B
Ythdf1	2	2.73059	0.00111402	0.000528822	Usp5	2	-0.535889	0.505008	0.408525	Usp5	2	0.0520014	0.527824	0.411665	Cox4i1	8	0.222773	0.414894	0.102369	Uqcrq	5	0.262398	0.14669	0.0272693						NSUN6		PAK4
Rpl37	5	2.72789	0.000909043	0.000411807	Vars	4	-0.539442	0.188928	0.120622	Vars	4	0.870921	0.185773	0.102433	Sfxn5	14	0.2226	0.72631	0.471148	Rplp1	4	0.261963	0.622878	0.423748						PAN2		NSD2
Eno1	7	2.7258	0.0105916	0.0088816	Rps6	8	-0.539887	0.264203	0.182099	Rps6	8	1.08024	0.0662057	0.0267391	Fbl	18	0.222496	0.412337	0.0971302	Vapb	7	0.258095	0.402816	0.191079						ZCCHC9		MOCS2
Rpl4	28	2.72438	0.00147563	0.000782263	Naca	2	-0.547423	0.425667	0.333089	Naca	2	1.90917	0.971394	0.960532	Tjp2	8	0.222182	0.784901	0.576002	Psmd12	5	0.257164	0.771699	0.61725						RRP9		MT-CYB
Flna	28	2.72386	0.00106489	0.000501448	Rplp0	9	-0.563377	0.170657	0.106686	Rplp0	9	1.32692	0.110105	0.0540541	Ap1b1	3	0.221826	0.987782	0.956936	Polr2b	5	0.256668	0.230047	0.0727952						TNRC6A		LDHA
Rps15a	5	2.7179	0.00200358	0.00114859	Dock1	3	-0.574572	0.124683	0.0707476	Dock1	3	0.85668	0.295148	0.185226	Cox6b1	6	0.221444	0.848343	0.682259	Ilf2	20	0.255934	0.288166	0.107139						TNRC6B		DHFR
Atxn2l	9	2.71576	0.000558072	0.000226591	Cct6a	9	-0.583521	0.18689	0.119095	Cct6a	9	0.930658	0.473458	0.355324	Aco2	17	0.220365	0.414894	0.105547	Naca	6	0.255917	0.1623	0.0357616						TNRC6C		CYB5R3
Smc2	4	2.71343	0.00138228	0.000717786	Septin 7	8	-0.58723	0.21591	0.141503	Septin 7	8	0.929674	0.186177	0.102881	Sec22b	15	0.218424	0.550937	0.206064	Serpine2	17	0.255891	0.218738	0.0656597						RP9		GOT2
Rpl7a	17	2.71322	0.00221527	0.00131048	Gpd1	8	-0.602965	0.581041	0.489577	Gpd1	8	1.65317	0.14205	0.0743744	Ndufa6	4	0.218241	0.962651	0.891596	Ctcf	11	0.254317	0.371542	0.160367						MRPL15		F12
Ckap4	4	2.71182	0.00130476	0.000663476	Rpl30	6	-0.605169	0.169595	0.105817	Rpl30	6	-2.2527	0.0141997	0.00301569	Zc3h15	3	0.216601	0.46839	0.147133	Dnajb12	5	0.254242	0.542816	0.325222						NGDN		CA1
Lrrfip2	9	2.70681	0.00209536	0.00121935	Glul	4	-0.616415	0.168038	0.104179	Glul	4	-1.05681	0.186955	0.103537	Prmt1	5	0.215298	0.354313	0.0626621	Rbm8a	2	0.252698	0.383819	0.172701						LSM10		ASS1
Lyn	4	2.70639	0.0025857	0.0016075	Etfa	2	-0.665705	0.524108	0.426511	Etfa	2	2.66667	0.295327	0.186004	Acin1	15	0.215262	0.385807	0.0851568	Ndufa4	6	0.252474	0.303673	0.117013						PUS1		OAS1
Arpc1a	2	2.70181	0.000201974	6.76493e-05	Srsf1	18	-0.678554	0.185063	0.117259	Srsf1	18	1.43207	0.0545303	0.0209022	Slc39a7	3	0.213964	0.903657	0.770308	Sec62	6	0.251862	0.482051	0.263935						MAK16		CST3
Tom1	6	2.70111	0.00165175	0.000901498	Sf3a1	2	-0.687667	0.214621	0.140399	Sf3a1	2	-0.75777	0.34243	0.22525	Mrps12	3	0.213845	0.50371	0.165287	Psip1	17	0.250841	0.359477	0.152854						RPS13		PDGFB
Slc25a18	7	2.70025	0.00258406	0.00160025	Rpl18	4	-0.688524	0.292973	0.205825	Rpl18	4	-1.84806	0.0299744	0.00935114	Lmnb2	4	0.213601	0.7516	0.512738	Itgav	7	0.249548	0.151313	0.0297454						SNRNP200		HLA-A
Rpl17	8	2.69612	0.00126126	0.000619991	FAM120A	5	-0.693495	0.674776	0.590735	FAM120A	5	0.220426	0.809627	0.730329	Map1a	26	0.212798	0.615019	0.31864	Kcnj10	5	0.249449	0.195893	0.0542752						PRDX1		HLA-A
Actr3	5	2.69551	0.000496422	0.000198569	Dync1h1	26	-0.701902	0.326899	0.240129	Dync1h1	26	-0.0800412	0.949276	0.915989	Srsf10	18	0.212506	0.365639	0.0764128	Mic13	5	0.249276	0.33169	0.133912						TSN		COL3A1
Olig1	3	2.69404	0.000939955	0.000429209	Rpl4	16	-0.707292	0.372385	0.280977	Rpl4	16	0.229103	0.381017	0.26169	Rpl31	11	0.211966	0.754177	0.517643	Dhcr7	5	0.248769	0.151313	0.0296782						NUFIP2		CRYAB
Cfl2	4	2.69274	0.00447244	0.00317921	Rps19	8	-0.732952	0.259104	0.177187	Rps19	8	-0.792595	0.230665	0.136349	Ikbkap	6	0.209722	0.461939	0.138352	Praf2	2	0.247903	0.175102	0.0425283						RBM19		LMNA
Phb2	6	2.69143	0.0012818	0.000633176	Wbp11	2	-0.75102	0.660049	0.572105	Wbp11	2	-3.65873	0.63923	0.534974	Bcap31	13	0.209449	0.671255	0.391527	Rps9	25	0.245275	0.164975	0.036896						TDRKH		APOH
Hepacam	4	2.68747	0.00124373	0.00060688	Rps3	12	-0.75317	0.10164	0.054937	Rps3	12	-0.515157	0.60321	0.493801	Snd1	42	0.209423	0.385807	0.0848942	Fam162a	4	0.244457	0.255799	0.0865419						NOP58		FN1
Atxn2	6	2.6864	0.00278696	0.00176955	Rpl8	12	-0.756596	0.0678866	0.0310143	Rpl8	12	0.692162	0.238241	0.142599	Ints3	2	0.208931	0.559571	0.220437	Rps15a	15	0.244094	0.173572	0.041415						RBM6		AFP
Rpl27a	5	2.68553	0.00216838	0.00126968	Wdr1	4	-0.777197	0.135363	0.0797121	Wdr1	4	-0.646983	0.517581	0.39992	Hdgfrp2	9	0.207529	0.442294	0.12776	Srpk2	8	0.243366	0.228969	0.0715213						RBM10		TFRC
Rps13	7	2.68496	0.00247952	0.00151161	Rpn2	9	-0.779289	0.0730475	0.034713	Rpn2	9	1.52917	0.0300911	0.00942393	Ddost	14	0.207062	0.560159	0.227862	Nomo1	25	0.243185	0.19964	0.0561666						RBM5		FTL
Snd1	4	2.68395	0.00201272	0.00115913	Paics	3	-0.786151	0.268819	0.186255	Paics	3	1.64566	0.187997	0.104569	Grm5	3	0.204026	0.722212	0.45883	Frg1	3	0.243035	0.272447	0.0956837						RBM44		SMR3B
Fabp7	3	2.67988	0.00490222	0.00356957	Fabp5	4	-0.787197	0.190668	0.122194	Fabp5	4	-2.48149	0.0713517	0.0301109	Sars	3	0.201982	0.829782	0.640862	Tmed2	3	0.241018	0.417139	0.206787						OASL		ANG
Rps21	2	2.67418	0.000378297	0.000142659	Nop58	7	-0.7873	0.0810264	0.0397784	Nop58	7	0.212919	0.777572	0.68731	Glg1	15	0.201272	0.737366	0.486261	Mtch2	7	0.240534	0.954416	0.917707						OAS1		SLPI
Arhgef2	2	2.67345	0.000874607	0.000390944	Mtpap	4	-0.803548	0.0967808	0.0513745	Mtpap	4	-0.231953	0.866747	0.804912	Prpf38b	4	0.20094	0.66576	0.382257	Ctnnd1	9	0.239407	0.897564	0.80956						OAS2		C4BPA
G3bp2	4	2.67277	0.000362838	0.000135081	Tardbp	4	-0.821647	0.168169	0.104521	Tardbp	4	1.53682	0.056636	0.0219833	Rbm15b	12	0.200579	0.414894	0.105384	Farp1	8	0.238889	0.562885	0.348523						OAS3		CAT
Rps11	19	2.6703	0.00305588	0.00198327	Fh	2	-0.834875	0.890292	0.855843	Fh	2	-1.02521	0.97884	0.971738	Lmna	9	0.200364	0.531665	0.190554	Cnp	5	0.238576	0.148209	0.0279739						SF3A3		PLA2G1B
Fmnl2	2	2.67006	0.00180396	0.00100631	Adar	4	-0.858696	0.611191	0.521766	Adar	4	1.72489	0.512937	0.392611	Ndufa5	5	0.199964	0.474687	0.150256	Nop16	8	0.238535	0.165398	0.0378154						NOC3L		ALDOA
Eif4b	5	2.66768	0.00046978	0.000185082	Idh1	5	-0.859892	0.0853866	0.0426417	Idh1	5	-0.0781864	0.525087	0.407625	Lonp1	5	0.199822	0.848989	0.686904	Ptn	11	0.237706	0.564253	0.353356						MYEF2		CSTB
Rpl9	7	2.66454	0.00285179	0.00181415	Eif3l	2	-0.875313	0.251132	0.170964	Eif3l	2	-1.46301	0.106788	0.0516508	Lrrc59	20	0.199199	0.574778	0.260596	Yars	17	0.237029	0.21613	0.063115						HNRNPM		ANXA1
Mtch1	2	2.66404	0.00116527	0.000557363	Rps10	10	-0.887647	0.094448	0.049408	Rps10	10	-0.373816	0.572404	0.4582	Scfd1	5	0.198171	0.927844	0.817523	Ankrd17	4	0.234522	0.28847	0.108634						C11orf68		APOB
H1f0	4	2.6634	0.0011614	0.000554116	Actr1b	3	-0.900694	0.220371	0.145226	Actr1b	3	1.76249	0.359033	0.240947	Gpx8	2	0.194456	0.997878	0.986547	Hcfc1	6	0.233238	0.878692	0.774801						MRPL10		NR3C1
Rpl34	8	2.66182	0.00117546	0.000563654	Hip1	3	-0.905071	0.112294	0.0621892	Hip1	3	-0.39616	0.512937	0.392481	Mybbp1a	54	0.194438	0.598675	0.290479	Sfxn5	14	0.231704	0.205173	0.0587461						RNASE10		S100B
Fads1	4	2.66104	0.00153481	0.000822881	Hnrnpul1	3	-0.912264	0.132196	0.0768091	Hnrnpul1	3	0.366978	0.931338	0.887418	Mmgt1	5	0.1935	0.521345	0.182415	Rpl22l1	5	0.231258	0.198389	0.0556732						CALR		GAPDH
Rrbp1	27	2.65094	0.00100121	0.000467887	Uba1	8	-0.933752	0.0923034	0.0473236	Uba1	8	0.437186	0.798405	0.714413	Rpl10a	17	0.189629	0.655913	0.365896	Rpl10	21	0.23077	0.332406	0.134789						CANX		TP53
Rps26	3	2.6465	0.00118855	0.000571365	Marcksl1	3	-0.960937	0.353641	0.262558	Marcksl1	3	-3.04047	0.105438	0.0504878	Hsd17b12	21	0.188746	0.363938	0.0753932	H1f0	9	0.230252	0.607172	0.400024						CALR3		HSPB1
Wiz	2	2.64214	0.000273446	9.65299e-05	Srsf7	5	-0.965306	0.0592036	0.0255571	Srsf7	5	1.34088	0.10549	0.0506401	Vapb	8	0.186265	0.443569	0.128443	Vdac2	20	0.22965	0.173788	0.0415903						RPP14		CYP1A1
Rps3a	22	2.64133	0.00111632	0.000531259	Hist1h4a	13	-0.981638	0.105591	0.0573465	Hist1h4a	13	0.141246	0.902761	0.843814	Znf326	17	0.185887	0.559571	0.21859	Mrps24	2	0.229595	0.939546	0.888426						RPS8		TYMS
Rpl14	8	2.63618	0.000992198	0.000461432	Rpl5	7	-0.986962	0.0406677	0.0152934	Rpl5	7	-0.254497	0.93048	0.885353	FAM120A	38	0.185814	0.675701	0.40427	Rpl37a	7	0.228927	0.3931	0.180031						PDCD7		RPN1
Nop56	9	2.63158	0.00247952	0.00151119	Rps5	7	-0.995888	0.128908	0.0746635	Rps5	7	-0.513324	0.971394	0.961997	Magt1	6	0.185715	0.908251	0.781681	Smc3	25	0.228926	0.558143	0.341047						RPS19BP1		ATP1A1
Ahcyl1	2	2.63088	0.00171439	0.000943593	Clta	3	-1.00312	0.0602591	0.0264499	Clta	3	-1.13626	0.303299	0.193368	Snrpd3	7	0.184409	0.574778	0.259686	Gstm1	2	0.228406	0.40675	0.195419						TRMT6		SLC25A5
Clasp1	6	2.61911	0.00121543	0.00059014	Pgam1	2	-1.00783	0.676123	0.593549	Pgam1	2	-1.69459	0.673723	0.574334	H2afj	9	0.184169	0.46839	0.146156	Srpk1	2	0.227396	0.335009	0.137201						RPL4		PCCA
Rpl3	20	2.61764	0.00198688	0.00112989	Hnrnpm	21	-1.01507	0.0602591	0.026433	Hnrnpm	21	0.545015	0.473458	0.3554	Rbm22	3	0.181785	0.46839	0.143253	Rbmx	9	0.227358	0.482051	0.264029						PRPF3		CYP2E1
Kif2a	4	2.6163	0.00153444	0.000820831	Rfc2	2	-1.01516	0.389367	0.298028	Rfc2	2	-1.1388	0.347926	0.23139	Xpo5	4	0.179587	0.494873	0.158753	Rab8b	3	0.226506	0.565412	0.355599						RARS		EIF2S1
Hist1h1a	7	2.61592	0.00315635	0.00209536	Hsp90b1	11	-1.01735	0.0877522	0.0442475	Hsp90b1	11	0.634261	0.953889	0.92736	Uqcrb	7	0.178136	0.806288	0.601998	Stt3a	10	0.226505	0.216403	0.0644278						RARS2		HMGN2
Ank3	6	2.61383	0.00157627	0.000854602	Sf3b1	8	-1.02651	0.314635	0.22675	Sf3b1	8	0.56039	0.999476	0.996187	Snrpb	7	0.177876	0.897983	0.756498	Smarcc2	3	0.225845	0.431839	0.216227						APOBEC4		RPLP1
Rpl18	11	2.61312	0.00235184	0.00141394	Hmgcs1	5	-1.03587	0.168038	0.104236	Hmgcs1	5	0.687791	0.680161	0.584758	Ddx5	50	0.176408	0.617938	0.320591	Ncan	11	0.222319	0.180627	0.044883						ZCCHC24		RPLP2
Myh10	79	2.61153	0.00157474	0.000851875	Dbi	3	-1.03892	0.161223	0.0996191	Dbi	3	-0.686663	0.415464	0.296904	Mrps30	3	0.176126	0.829782	0.638711	Hdgfrp2	7	0.219802	0.218327	0.0653114						RPS21		RPLP0
Rpl29	4	2.6068	0.00205028	0.00118344	Rab7a	2	-1.05789	0.562827	0.469308	Rab7a	2	1.17016	0.297572	0.188546	Glipr2	2	0.175809	0.60258	0.296689	Agpat5	3	0.219484	0.19513	0.0535662						DDX24		JUN
Ccdc88a	5	2.60406	0.00208789	0.00121248	Lgals1	3	-1.06996	0.09892	0.0529886	Lgals1	3	-0.969735	0.280548	0.174028	Nmt1	8	0.175472	0.860673	0.706741	Pex14	2	0.217997	0.445177	0.231149						RTCB		POLR3D
Rpl31	4	2.59912	0.00431054	0.00301218	Nap1l1	6	-1.07456	0.0701172	0.0325877	Nap1l1	6	-0.207867	0.778236	0.689127	Pycr2	9	0.175086	0.559571	0.213344	Dad1	2	0.217535	0.877844	0.772177						MBNL2		SSB
Lrch1	2	2.59754	0.00144979	0.000766816	Rbm4	3	-1.0768	0.10164	0.0548142	Rbm4	3	3.46292	0.00480549	0.000360267	Sec61b	2	0.175031	0.7516	0.512263	Myh14	2	0.21742	0.6431	0.446597						MBNL3		KRT18
Ddx21	8	2.59519	0.000980039	0.000453113	Rpl12	6	-1.07737	0.0618448	0.0273703	Rpl12	6	-0.414909	0.369905	0.250033	Igfbp3	2	0.17468	0.827675	0.628448	Polr2a	10	0.215434	0.238257	0.0772131						MBNL1		PTMA
Abcf1	4	2.59488	0.00374209	0.00255184	Rpl14	3	-1.07812	0.0967808	0.0512241	Rpl14	3	-1.48956	0.0315182	0.0100996	Rps13	11	0.174446	0.671255	0.39494	Srprb	8	0.215416	0.197011	0.0547252						ALYREF		ATP5B
Erlin2	2	2.5937	0.00560744	0.00420896	Rack1	6	-1.10491	0.106049	0.0578332	Rack1	6	-1.40547	0.0678351	0.0279707	Llgl1	9	0.174116	0.566329	0.251547	Rtcb	20	0.215318	0.618668	0.416852						LSMD1		S100A9
Agap1	2	2.58938	0.003164	0.00210425	Hspa4	7	-1.10534	0.37328	0.282555	Hspa4	7	1.14203	0.344812	0.228533	Phf6	13	0.173887	0.50371	0.165743	Copb1	4	0.215211	0.968508	0.945744						PUS7		EIF4E
H2afx	2	2.58661	0.00171543	0.000948651	Ddx46	5	-1.10678	0.0378578	0.0137332	Ddx46	5	-0.586739	0.295327	0.186052	Ap2a1	14	0.173529	0.452537	0.132646	Ephx1	4	0.214908	0.550891	0.33234						PUS7L		ENO1
Atp5a1	13	2.5836	0.00333929	0.00224497	Tcp1	8	-1.10786	0.06573	0.0296461	Tcp1	8	1.28291	0.214166	0.123269	Acaa2	8	0.172807	0.621982	0.324455	Scp2	2	0.214734	0.247587	0.0807655						MRPS24		NPM1
Srrm1	9	2.58179	0.00123433	0.000600806	Sptbn1	2	-1.12497	0.153273	0.092483	Sptbn1	2	-0.252194	0.856848	0.79261	Rpl11	13	0.17187	0.46839	0.144679	Tmcc3	2	0.214432	0.255799	0.0869061						RBBP6		DBI
Rps5	11	2.58173	0.00318757	0.00212377	Sf3b3	2	-1.12888	0.61103	0.520393	Sf3b3	2	0.226554	0.437699	0.316842	Drg1	13	0.171777	0.769554	0.551178	Rplp2	6	0.214192	0.383334	0.169695						RPL19		LDHB
Slc1a3	3	2.58052	0.0105964	0.00889841	Ran	7	-1.13333	0.109637	0.060251	Ran	7	-0.372567	0.6528	0.551762	Ran	17	0.171659	0.98078	0.943409	Ptrh2	4	0.213805	0.968508	0.945429						NOL3		P4HB
Add1	5	2.57745	0.001498	0.000797731	Actc1	4	-1.13419	0.154893	0.0945839	Actc1	4	1.2479	0.359314	0.242005	Ndufa8	8	0.1712	0.722212	0.458449	Erlin2	13	0.211262	0.313667	0.122875						RPS27		KLK3
Rpl36a	10	2.57052	0.00130476	0.000664956	Nes	23	-1.14778	0.0589192	0.0251592	Nes	23	0.0132089	0.878359	0.81782	Samm50	2	0.168829	0.697015	0.429249	Agpat3	7	0.210937	0.382671	0.168076						RPS27L		H1F0
Eif2a	3	2.5705	0.00144689	0.00076354	Slc25a5	8	-1.1571	0.1341	0.0788059	Slc25a5	8	1.21823	0.171912	0.0932903	Ikbip	8	0.16712	0.723325	0.464246	Slc1a3	8	0.208979	0.878063	0.773621						PTRF		CTSD
Farp1	3	2.56687	0.00306531	0.00200168	Septin 2	4	-1.15976	0.052456	0.0211854	Septin 2	4	0.392033	0.412719	0.294443	Oat	3	0.166815	0.584944	0.276848	Nsun2	21	0.208718	0.198389	0.0556016						MRPS18A		ANXA2
Rrs1	3	2.56556	0.00140908	0.000736798	Ywhab	4	-1.16572	0.053929	0.0223672	Ywhab	4	-0.747454	0.415902	0.297719	Coro1c	5	0.1664	0.565457	0.245812	Lbr	13	0.208229	0.514848	0.294094						SLBP		DCN
Rpl23	7	2.55783	0.00152879	0.000815969	Fdps	7	-1.1675	0.0477547	0.0189149	Fdps	7	-0.257814	0.584236	0.470497	Olig1	7	0.166285	0.784677	0.575281	Marc2	6	0.207859	0.198389	0.0553051						EARS2		PFN1
Soga1	3	2.55728	0.00063487	0.000265422	Fasn	15	-1.17327	0.0772965	0.0374207	Fasn	15	0.882151	0.397401	0.27919	Rps15a	16	0.165806	0.631004	0.341253	Dhx9	82	0.206379	0.264041	0.0908137						SMAD1		EPRS
Tubb2b	3	2.54769	0.00130476	0.000662822	Thrap3	11	-1.17989	0.0666933	0.0301612	Thrap3	11	-0.994044	0.220926	0.128228	Ndufa12	3	0.165713	0.608459	0.30979	Acadm	4	0.205497	0.384639	0.17506						SMAD2		HSP90AA1
Rpl38	7	2.54754	0.00219004	0.00129028	RtcA	7	-1.1844	0.240995	0.162165	RtcA	7	-0.606426	0.778236	0.689779	Farsa	8	0.164782	0.559571	0.219189	Wdfy3	2	0.205061	0.867928	0.757892						SMAD5		HNRNPC
Rps14	8	2.54304	0.00246975	0.00149647	Ncl	46	-1.19716	0.0828649	0.0409816	Ncl	46	0.921581	0.127406	0.0650127	Mlec	13	0.164721	0.608459	0.312029	Ndufs3	6	0.205015	0.226846	0.0701221						SMAD9		ERCC1
Abcd3	2	2.54297	0.00653661	0.0050954	Dpysl2	15	-1.19944	0.117351	0.0659701	Dpysl2	15	-1.10232	0.528721	0.413958	Spats2l	6	0.16424	0.557951	0.209875	Lman1	11	0.204851	0.218088	0.0650848						SMAD3		RNASE1
Hist1h1d	2	2.54242	0.00483778	0.00351131	Gtdc1	2	-1.22132	0.615759	0.527155	Gtdc1	2	-0.153525	0.773019	0.681416	Son	8	0.164073	0.757638	0.525346	Dpm1	3	0.203479	0.402684	0.19073						SMAD4		ABCB1
Macf1	24	2.54216	0.00154871	0.000832198	Calm1	8	-1.25537	0.105591	0.0572354	Calm1	8	0.286327	0.953496	0.924672	Xrn2	16	0.162639	0.834359	0.650196	Btf3l4	3	0.203264	0.676136	0.483986						SMAD7		SLC3A2
Rpl28	14	2.54023	0.00200358	0.00114515	Ddx47	2	-1.29725	0.566413	0.474636	Ddx47	2	3.11734	0.268359	0.164845	Ddx3y	5	0.161223	0.795897	0.590286	Scaf1	3	0.202188	0.191089	0.0509848						SMAD6		CELA2B
Nop2	5	2.53966	0.00211927	0.00123581	Hspa5	7	-1.30248	0.0322546	0.0108282	Hspa5	7	-0.124521	0.587598	0.47509	Tmx1	2	0.160145	0.507081	0.16952	Srpra	4	0.201723	0.91911	0.841208						PRPF39		HSP90AB1
Map4k4	14	2.5386	0.00143394	0.000753248	Eif3c	3	-1.33984	0.0887749	0.0450852	Eif3c	3	-4.54162	0.00633368	0.00074098	Ipo9	4	0.159799	0.562104	0.236145	Hsd17b12	21	0.200274	0.598773	0.391845						SRP68		SRPRA
Tmod3	12	2.53625	0.00275029	0.00173301	Cct4	4	-1.35477	0.0405861	0.0152136	Cct4	4	0.708321	0.565704	0.449416	Srprb	6	0.159559	0.668249	0.38416	Nifk	6	0.200149	0.784342	0.63653						ADARB2		PLEK
Ywhaz	2	2.53493	0.020864	0.0190038	Prdx1	8	-1.36729	0.0739057	0.0354044	Prdx1	8	-0.121492	0.93606	0.895312	Rab7a	7	0.159036	0.723325	0.462881	Tubb5	5	0.199506	0.384156	0.17402						ADAD1		SNRPB2
Atp5j2	2	2.5332	0.00483778	0.00351467	Nap1l4	4	-1.37909	0.0678866	0.0309141	Nap1l4	4	-0.476452	0.387388	0.269345	Larp4	3	0.157472	0.560159	0.2338	Ndufs7	6	0.199369	0.282422	0.103595						ADAD2		SNRNP70
Rps25	8	2.52828	0.00174976	0.000969745	Pkm	34	-1.3815	0.117406	0.0663924	Pkm	34	-0.197128	0.969617	0.955547	Emc4	6	0.156831	0.60258	0.299957	Srp14	3	0.198354	0.771036	0.615063						ADAT1		VIM
Maged1	5	2.52749	0.00125278	0.000614313	Rpl23	10	-1.39006	0.0292756	0.00906234	Rpl23	10	-0.652545	0.509835	0.389003	Fam120c	35	0.156241	0.740825	0.495145	Rpl27a	11	0.19793	0.304876	0.117694						ADARB1		RPS17
Rpl21	6	2.5251	0.00165175	0.000901341	Arhgdia	3	-1.3933	0.0538954	0.0221768	Arhgdia	3	-1.97368	0.217414	0.125664	Trmt2a	3	0.156218	0.979348	0.937263	Atp5l	6	0.196714	0.184581	0.0466166						ADAR		RPSA
Myo1e	21	2.52266	0.00234383	0.0014063	Glud1	7	-1.40062	0.0253012	0.00718957	Glud1	7	-1.51287	0.0648834	0.0258121	Msi2	15	0.155583	0.737366	0.489546	Gadd45gip1	2	0.196682	0.973439	0.9559						CLK3		MRPL3
Capza2	18	2.52095	0.00253688	0.00156492	Hint1	4	-1.41343	0.030988	0.00989218	Hint1	4	-0.990043	0.328544	0.214527	Rpn1	40	0.155377	0.60258	0.299852	Rbm26	5	0.196598	0.441621	0.226824						CLK4		SNRPA
Hsd17b12	5	2.51411	0.00563319	0.00423507	Rbm3	9	-1.42627	0.0522443	0.0209828	Rbm3	9	-1.04887	0.276259	0.171033	Cct7	12	0.155162	0.60258	0.297589	Ncapg2	2	0.196469	0.797058	0.658538						PRPF4B		HOXD4
Tpgs1	2	2.51266	0.00133056	0.000684515	Prpf31	3	-1.4279	0.0312865	0.0100631	Prpf31	3	0.854441	0.0852374	0.0379291	Dnaja1	5	0.154622	0.655913	0.365435	Psmc1	4	0.195965	0.181771	0.0454427						CLK1		ENO2
Hist1h1c	19	2.51024	0.00258501	0.00160395	Rps16	9	-1.43191	0.109637	0.060418	Rps16	9	-3.70046	0.006597	0.000789725	Eif6	3	0.154284	0.5897	0.281666	Fads2	14	0.195537	0.282422	0.103415						CLK2		ACAA1
U2af1	5	2.50843	0.000278392	9.89467e-05	Vdac1	10	-1.43257	0.0210503	0.00559983	Vdac1	10	0.379176	0.810309	0.731923	Sec63	18	0.153539	0.757638	0.524507	Stx5	2	0.195459	0.844127	0.716921						LSM3		SRP19
Cobll1	4	2.50824	0.00301398	0.00194475	Acly	7	-1.43643	0.0477547	0.0189402	Acly	7	0.440004	0.778379	0.692599	Anp32b	7	0.153149	0.998278	0.995127	Rps27a	8	0.19512	0.557809	0.339478						FAM46A		GSTP1
Efhd1	9	2.50197	0.00816309	0.00655998	Fabp7	5	-1.44174	0.0284629	0.00859252	Fabp7	5	-0.797124	0.238304	0.142925	Maz	3	0.152942	0.836658	0.657102	Rpl15	12	0.194663	0.4047	0.192549						CRYZ		SNRPC
Rrp1	2	2.50149	0.00144034	0.000758346	Mtss1l	2	-1.44251	0.724069	0.654904	Mtss1l	2	-3.04272	0.636573	0.531888	Myh14	5	0.152924	0.998278	0.988956	Mrps23	5	0.19337	0.227988	0.0706372						KIN		MMP7
Smc1a	7	2.49541	0.00130476	0.00066282	Rpsa	13	-1.46146	0.029877	0.00939302	Rpsa	13	-0.539756	0.235883	0.140617	Ndufa7	8	0.152426	0.492456	0.157278	Hnrnpdl	18	0.193054	0.186926	0.0483292						RPS2		VIL1
Znf24	2	2.49453	0.00176474	0.000980173	H2afz	2	-1.46574	0.0896242	0.0457333	H2afz	2	0.845704	0.115017	0.0570216	Psmd7	5	0.151854	0.795884	0.58951	Gtf2i	23	0.190061	0.558143	0.341554						DUS4L		LGALS1
Rpl35	5	2.49381	0.00306932	0.002008	Acat2	3	-1.46776	0.0967808	0.0511125	Acat2	3	-2.56752	0.0173367	0.00410735	Tmed9	7	0.151654	0.678679	0.407978	Immt	50	0.18986	0.267266	0.0930863						EIF4A1		HMGB1
Rpl26	13	2.49278	0.0031168	0.00204326	Ganab	5	-1.48049	0.0701172	0.0325142	Ganab	5	-0.360622	0.54633	0.432043	Etfa	7	0.147973	0.723325	0.461667	Smarca4	11	0.18941	0.844127	0.717247						EIF4A2		ANXA4
Tanc1	9	2.49165	0.00305588	0.00198816	Myh9	15	-1.48096	0.0884509	0.0448137	Myh9	15	0.00504648	0.935785	0.893918	Gatad2a	2	0.147729	0.540157	0.201648	H2afj	9	0.189362	0.360375	0.15375						EIF4A3		CNP
Fscn1	6	2.48937	0.0129883	0.0112849	Aco2	6	-1.48115	0.0307623	0.00971575	Aco2	6	-0.757679	0.46397	0.343727	Smarca5	43	0.147235	0.911837	0.788231	Sec61b	2	0.189039	0.480154	0.261265						IGF2BP1		DLD
Actc1	3	2.48708	0.00156677	0.000845658	Rps23	6	-1.48502	0.0167133	0.00408816	Rps23	6	-0.792518	0.386118	0.267309	Eef1g	13	0.146673	0.559571	0.223412	Spon1	18	0.188451	0.884251	0.784474						IGF2BP2		HNRNPA1
Rps27l	3	2.48588	0.00379508	0.00259254	Ybx3	3	-1.51286	0.0452909	0.0177987	Ybx3	3	0.126042	0.629217	0.523744	Rpl30	11	0.145778	0.458434	0.136398	Trap1	19	0.188397	0.634652	0.43847						IGF2BP3		SNRPA1
Rcc2	6	2.47395	0.00133155	0.000686629	Crip2	2	-1.52467	0.0582327	0.0245746	Crip2	2	-0.555138	0.685553	0.591051	Ap2b1	16	0.145462	0.566201	0.247821	Rps6	23	0.188319	0.383334	0.168737						UBAP2		GIP
Rpf2	2	2.47175	0.00374193	0.00254721	Cs	3	-1.52585	0.0932169	0.0480174	Cs	3	0.0300767	0.810324	0.732917	Rbm8a	2	0.144005	0.60258	0.295018	Slc4a4	12	0.187935	0.28847	0.10869						UBAP2L		PARP1
Dst	5	2.47098	0.000980039	0.000453415	Vcp	12	-1.52709	0.0780693	0.0380434	Vcp	12	-0.805009	0.612767	0.505224	Eif3e	7	0.143941	0.995552	0.978315	Smc2	13	0.187341	0.419369	0.208191						SNRPE		POLA1
Uaca	15	2.47	0.00306531	0.00200055	Fubp1	13	-1.55545	0.0477401	0.018819	Fubp1	13	-1.91661	0.0200783	0.00521988	Uqcrc1	18	0.143802	0.419868	0.110256	Prkcb	2	0.187179	0.305089	0.118428						EIF2B5		IFIT2
Luc7l2	5	2.46659	0.00301398	0.00194122	Hnrnpf	10	-1.56178	0.0201946	0.00534777	Hnrnpf	10	0.826387	0.19138	0.107145	Leng8	2	0.142156	0.753512	0.515452	Soat1	4	0.186874	0.417139	0.206637						CRNKL1		IFIT1
Tufm	4	2.45949	0.00277938	0.00176139	Aqr	3	-1.56427	0.0339941	0.0118794	Aqr	3	-1.97932	0.019953	0.00511649	Pdhb	11	0.141289	0.559571	0.213704	Tmed10	10	0.185267	0.345702	0.143775						POLRMT		LTA4H
Hist1h2bm	12	2.4573	0.00313059	0.00206694	Rps12	5	-1.5663	0.0276127	0.00821369	Rps12	5	-0.100591	0.533454	0.419281	Eif4a3	23	0.140764	0.566329	0.250218	Rab7a	6	0.184484	0.28301	0.104214						METTL10		ALDOC
Serbp1	11	2.45244	0.00233205	0.00139361	Ckb	22	-1.56741	0.0701172	0.032727	Ckb	22	-0.914646	0.470629	0.350553	Fxr1	34	0.140671	0.628946	0.339003	Atad3	14	0.18425	0.70519	0.522974						MRPL41		NUDT7
Hist1h1e	6	2.45214	0.00452602	0.00323114	Cct8	5	-1.58404	0.0142637	0.00310862	Cct8	5	0.446943	0.93048	0.884147	Ppp1r10	6	0.138902	0.671255	0.391195	Rpn1	39	0.18406	0.318659	0.12642						MRPS7		HIST1H2AG
Dclk2	6	2.44585	0.00276932	0.00175168	Ctsd	3	-1.58496	0.0322546	0.0108932	Ctsd	3	-0.784074	0.371687	0.252009	Purb	15	0.137621	0.727819	0.47471	Ywhaq	6	0.183612	0.564253	0.352988						NSUN5		RBMY1D
Csrp1	2	2.44484	0.00420826	0.00291536	Fscn1	7	-1.58551	0.105591	0.0574557	Fscn1	7	0.202772	0.923009	0.870783	Terf2	3	0.136711	0.578818	0.264555	Rbm4b	7	0.183054	0.312072	0.121806						NSUN7		SLC35G6
Ssh2	2	2.4435	0.0031168	0.0020537	Farsb	9	-1.58675	0.0343652	0.0120922	Farsb	9	-0.849651	0.180167	0.098471	Fmnl2	9	0.135796	0.560159	0.234559	Hexa	5	0.181218	0.561262	0.344692						MTG1		ATXN1L
Srgap2	22	2.44217	0.00205028	0.00118571	Lmnb1	9	-1.59483	0.0284629	0.00861177	Lmnb1	9	-0.34775	0.514096	0.396149	Rsu1	3	0.135789	0.846467	0.675852	Atxn2l	2	0.180952	0.818023	0.683073						MRPS28		POLR2M
Gnai2	4	2.44147	0.00855358	0.00692402	Basp1	2	-1.60822	0.186279	0.11848	Basp1	2	-3.45754	0.0489427	0.0181686	Exoc4	3	0.135645	0.474582	0.149886	Mrps22	3	0.18043	0.378943	0.16464						TDRD10		PABPC4L
Nifk	5	2.44106	0.0046873	0.0033875	Luc7l3	2	-1.62833	0.0159983	0.00378303	Luc7l3	2	-0.156875	0.902871	0.845009	Abhd12	12	0.134574	0.795884	0.588788	Ssr1	2	0.179768	0.897564	0.81061						RPUSD1		UBC
Tuba1b	13	2.4408	0.000537493	0.000217587	Rps9	14	-1.63962	0.0125201	0.00245255	Rps9	14	-0.693546	0.317931	0.203753	Nap1l4	2	0.133651	0.584061	0.271725	Fkbp8	9	0.179609	0.721401	0.547953						NHP2		ZNF888
Gtpbp4	2	2.44074	0.00819302	0.0065939	Son	3	-1.64309	0.152182	0.0910887	Son	3	-1.08721	0.344687	0.227569	Rbm7	4	0.132553	0.623239	0.329007	Ckap4	41	0.179319	0.205094	0.0585774						XAB2		PNMA6A
Sptan1	66	2.43872	0.0055597	0.00416642	Atp5o	3	-1.6455	0.22481	0.149239	Atp5o	3	-4.29499	0.0109316	0.00191666	Zfp91	2	0.13085	0.718533	0.449042	Lmf2	5	0.178924	0.441621	0.226327						FAU		RBMY1A1
Amer2	2	2.43366	0.00131174	0.000670096	Cltc	19	-1.64883	0.0370174	0.013294	Cltc	19	-0.747559	0.18021	0.09893	Slc25a10	2	0.129562	0.623239	0.328874	Mgst1	6	0.177694	0.29975	0.114283						RRP36		RBMY1C
Cpsf6	2	2.43349	0.000757282	0.000331197	Cct3	9	-1.6546	0.0162754	0.00389665	Cct3	9	-0.922399	0.221001	0.128539	Fads2	18	0.129451	0.60258	0.296543	Top1	19	0.177208	0.512537	0.292044						GRWD1		HNRNPCL4
Lrrc49	2	2.43079	0.00271288	0.00169964	Erh	3	-1.66681	0.109637	0.0604526	Erh	3	-4.67508	0.0116622	0.00214348	Ddx50	18	0.129007	0.746878	0.504103	Srp54	4	0.17622	0.413423	0.202638						ENDOV		HSPA1A
Ythdc1	2	2.42928	0.00274738	0.00172456	Rbm39	7	-1.6713	0.0292993	0.0091051	Rbm39	7	-0.518137	0.487448	0.368386	Plec	4	0.128987	0.656136	0.367671	Prps1	3	0.175843	0.483967	0.265768						VARSL		HSPA1B
Hspa8	9	2.4265	0.00782375	0.00624958	Rhoa	2	-1.68346	0.0538954	0.0222066	Rhoa	2	-4.13509	0.0147732	0.00325118	Nsdhl	2	0.126947	0.661261	0.37547	Spcs2	7	0.175223	0.29636	0.112718						MRRF		U2AF1L5
Prrc2a	17	2.41943	0.00274764	0.00172803	Ybx1	12	-1.73554	0.0175864	0.00438066	Ybx1	12	-0.643796	0.159745	0.0853776	Spon1	18	0.125582	0.671255	0.392844	Ptdss2	2	0.1748	0.32999	0.132325						MTFMT		ZBTB48
Immt	27	2.41317	0.00301398	0.00194963	Hspa8	18	-1.73883	0.00713266	0.00103022	Hspa8	18	-1.15942	0.0458815	0.0164774	Srrm2	31	0.124949	0.614153	0.317755	Mmgt1	4	0.174156	0.97556	0.959578						C12orf65		RNASE2
Hmgn2	6	2.41225	0.00430145	0.00300065	Rplp2	7	-1.73935	0.00751084	0.00110801	Rplp2	7	0.981196	0.359033	0.240936	Sucla2	10	0.12341	0.623239	0.327878	Metap2	4	0.173438	0.813449	0.676438						MRTO4		TROVE2
Epb41l5	3	2.41035	0.00323685	0.0021644	Rps29	2	-1.74058	0.89894	0.869164	Rps29	2	-3.11056	0.561113	0.445091	Echs1	4	0.122118	0.860824	0.707477	Lman2	7	0.17287	0.919719	0.844591						RBM26		RARA
Ddx6	2	2.41022	0.00225144	0.00134001	Cap1	2	-1.74187	0.00944365	0.00159868	Cap1	2	-1.80745	0.0223177	0.00609892	Htra1	3	0.120017	0.832211	0.64714	Dcakd	9	0.172756	0.510944	0.289064						RBM27		HLA-A
Rps19	12	2.40875	0.00297712	0.00191181	Hsp90ab1	34	-1.75267	0.0150181	0.00343219	Hsp90ab1	34	-0.767057	0.240374	0.144748	Phf2	3	0.118483	0.50371	0.165229	Pmvk	2	0.172588	0.402684	0.190281						DIS3		HIST1H1E
Hist1h1b	10	2.40874	0.00494285	0.00361483	Atp5b	15	-1.76573	0.0292756	0.00904247	Atp5b	15	-0.0976595	0.999476	0.999248	Adamts4	4	0.118413	0.661261	0.37567	Idh2	8	0.172113	0.48493	0.266642						DIS3L		DLAT
Vdac2	3	2.40738	0.0058495	0.00442589	Bzw1	2	-1.77032	0.201273	0.129628	Bzw1	2	1.09114	0.798396	0.71344	Chst2	11	0.117948	0.737929	0.491254	Znf385a	4	0.17007	0.692783	0.510705						DIS3L2		SAG
Gfap	45	2.39915	0.00374193	0.00254432	Msn	10	-1.77141	0.0225138	0.00620695	Msn	10	-0.226593	0.514096	0.39624	Clptm1	7	0.11769	0.46839	0.144302	Ddx1	28	0.16906	0.622878	0.423796						C1QBP		TXN
Atad3	25	2.39507	0.00315289	0.00208547	Calr	6	-1.77482	0.0589192	0.0252918	Calr	6	-0.620417	0.612767	0.505329	Emc2	14	0.117224	0.957671	0.874071	Tmpo(lap2a)	2	0.167415	0.818023	0.684413						SUB1		MGST1
Eif3b	2	2.39299	0.00191513	0.00107524	Gapdh	12	-1.77598	0.154349	0.094065	Gapdh	12	-0.995658	0.254812	0.155291	Ap3d1	5	0.115658	0.829782	0.634606	Btbd17	2	0.166404	0.441621	0.226114						MRPS33		MAPT
Traf4	2	2.3926	0.00198286	0.00112521	Gnl2	2	-1.7982	0.128458	0.0739744	Gnl2	2	0.523733	0.358585	0.239779	Tbl2	10	0.114755	0.832211	0.646594	Prrc2c	22	0.166368	0.278552	0.10158						PRPF6		CHGA
Ralb	2	2.38933	0.00157754	0.000857193	Aldoa	10	-1.80527	0.036875	0.0131983	Aldoa	10	-1.58554	0.206423	0.117813	Cyc1	8	0.113952	0.671028	0.388615	Tra2b	19	0.166262	0.317811	0.125631						SMG8		HSPD1
Sptbn1	46	2.3877	0.00530349	0.0039233	Prrc2c	3	-1.82685	0.527035	0.429531	Prrc2c	3	-4.09585	0.0972139	0.0448557	Dhx15	34	0.113521	0.776218	0.56628	Rpl13	21	0.164968	0.562885	0.350066						PSTK		THRA
Cbx3	2	2.38304	0.000886401	0.000399414	Atp1a3	2	-1.82719	0.0311377	0.00997761	Atp1a3	2	-3.60766	0.0172443	0.00402437	Dpm1	3	0.113244	0.743656	0.499817	Rpl32	7	0.162559	0.33169	0.133289						GAPDH		HSPA5
Rpl8	10	2.38115	0.00293083	0.00187856	Arf3	3	-1.86069	0.0181043	0.00468478	Arf3	3	-0.168276	0.845552	0.779094	Pgrmc2	3	0.110496	0.674084	0.40091	Rpl35a	12	0.162404	0.385436	0.175697						TNPO3		MAP2
Rps6	14	2.37927	0.00195344	0.00110146	U2af1	11	-1.86503	0.0215358	0.00580712	U2af1	11	-1.01888	0.230665	0.136056	Repin1	3	0.109045	0.967044	0.909776	Psmd2	5	0.162322	0.320524	0.127844						IPO13		HSPA8
Jup	4	2.37503	0.0252622	0.0232853	Rps18	8	-1.86703	0.0125201	0.00244671	Rps18	8	-1.37341	0.0364717	0.0121719	Ckap4	41	0.108886	0.559571	0.222571	Pfkm	19	0.161599	0.863898	0.748219						MOV10		SLC2A2
Ddx27	2	2.37128	0.00615236	0.00471434	Lsm2	3	-1.88961	0.0110123	0.00201071	Lsm2	3	-2.93193	0.0056175	0.000566642	Khsrp	36	0.108183	0.901606	0.76083	Lrrc59	18	0.161498	0.356365	0.15077						MOV10L1		EPB41
Myo1c	3	2.36747	0.00253049	0.00155488	Myl6	3	-1.89205	0.152312	0.0915347	Myl6	3	0.538356	0.907138	0.850099	Dbt	4	0.107908	0.532582	0.193529	Emc1	27	0.16138	0.552749	0.334392						PARP1		DBT
Pde4dip	3	2.36684	0.00305588	0.00198532	Hk1	2	-1.90308	0.560051	0.464564	Hk1	2	-3.06752	0.391355	0.273995	Mbnl2	5	0.107303	0.927844	0.815268	Tardbp	13	0.16085	0.384535	0.174465						MRPS35		PIM1
Mki67	12	2.36625	0.00301398	0.00195001	Tkt	4	-1.92276	0.0436075	0.0168208	Tkt	4	-0.474836	0.446752	0.325205	Sdhb	13	0.107193	0.896679	0.754763	Nfib	4	0.160044	0.402684	0.190529						GPKOW		TOP1
Pkm	3	2.36562	0.118073	0.114374	Aldoc	6	-1.93365	0.0871242	0.0438255	Aldoc	6	-1.77388	0.330505	0.216207	Tubb2b	2	0.106815	0.656136	0.3671	Rbmxl1	39	0.160007	0.522384	0.304724						SETD1A		TOP2A
Actb	35	2.36192	0.00399368	0.00273303	Rrm1	2	-1.94171	0.0750462	0.0361166	Rrm1	2	-0.164202	0.968002	0.952785	Smu1	5	0.106647	0.956307	0.872146	Maoa	12	0.159044	0.562885	0.35126						SETD1B		ESRRA
Rpl13a	13	2.35738	0.00444686	0.00315031	Phgdh	7	-1.95692	0.0185195	0.00481461	Phgdh	7	-1.44617	0.141387	0.0738562	Eif2s1	23	0.106581	0.674088	0.401869	Abce1	4	0.158868	0.454349	0.238359						SF3A2		FGF3
Gas2l1	4	2.35238	0.0129883	0.0112983	Fam120c	8	-1.96084	0.0322546	0.010975	Fam120c	8	-1.48204	0.07896	0.0347539	Myo9b	3	0.106449	0.766332	0.54062	Itm2c	3	0.158174	0.555349	0.336611						AFF1		PC
Fbl	9	2.34993	0.00411389	0.00283511	Itgb1	2	-1.96893	0.0646596	0.0289287	Itgb1	2	-0.770806	0.705114	0.611326	Kpna4	3	0.106424	0.661831	0.377183	Rpl12	8	0.157742	0.264041	0.0910297						AFF3		CYP2A6
Capza1	10	2.34039	0.00585027	0.00443352	Ywhaq	8	-1.97169	0.0232364	0.00651854	Ywhaq	8	0.0204828	0.58657	0.473086	Pak1ip1	9	0.104328	0.848343	0.682132	Gatad2b	6	0.157513	0.402684	0.190022						AFF4		CYP19A1
Psip1	9	2.339	0.00430145	0.00299748	Ppia	7	-1.97347	0.0555291	0.0233665	Ppia	7	-2.39158	0.0813575	0.0360058	Mcm7	19	0.103758	0.560159	0.231282	Rpa1	3	0.156923	0.940669	0.895679						AFF2		MTHFD1
Plekha7	3	2.33718	0.00149441	0.000794019	Rps17	5	-2.00004	0.00769441	0.0011723	Rps17	5	-0.950782	0.252293	0.15345	Wdr82	4	0.103603	0.678679	0.407613	Rps4x	34	0.15659	0.576925	0.367769						PARK7		SRF
Cfl1	10	2.33142	0.00447858	0.00318896	Zranb2	3	-2.00127	0.0157812	0.00366383	Zranb2	3	-0.402595	0.344812	0.22849	Syt11	5	0.103583	0.560159	0.231571	Hist2h2aa1	2	0.15606	0.721401	0.549453						TRNAU1AP		PABPC1
Rplp2	2	2.32101	0.0046873	0.00338841	Arpc2	2	-2.01694	0.273191	0.189945	Arpc2	2	-2.91384	0.116001	0.0579302	Emc8	8	0.103266	0.677416	0.406257	Itgb1	4	0.155579	0.480154	0.261964						SRBD1		HARS
Dkc1	2	2.31369	0.00171543	0.000948599	Fam98b	6	-2.02238	0.0410405	0.0155329	Fam98b	6	-2.7592	0.019953	0.00510346	Ppp1cb	15	0.102728	0.590371	0.282825	Hsdl2	3	0.154629	0.897564	0.809308						EIF3D		IMPDH2
Flii	11	2.31275	0.00503104	0.00369751	Eef1b	2	-2.02671	0.155677	0.0952508	Eef1b	2	2.82328	0.0200783	0.00520216	Acbd5	6	0.102559	0.878134	0.729661	Prex1	12	0.154078	0.445177	0.231039						NOP10		TPR
Eml4	2	2.31027	0.00234011	0.00140125	Smarca4	3	-2.04675	0.0701172	0.032695	Smarca4	3	0.547714	0.798525	0.715486	Mrpl40	3	0.102552	0.997878	0.985955	Nudc	4	0.152116	0.345702	0.143658						WARS		PIP
Myo6	56	2.30736	0.00440061	0.00309349	Dnm1l	2	-2.06265	0.0939775	0.0486365	Dnm1l	2	-3.92316	0.0335353	0.0109081	Ralb	3	0.102076	0.722212	0.457404	Btf3	7	0.150905	0.438764	0.221257						MATR3		RNASE3
Llgl1	3	2.3061	0.00193392	0.00108812	Idh2	2	-2.07169	0.0133489	0.0027707	Idh2	2	-0.383962	0.587598	0.475336	Ccdc47	19	0.100442	0.565457	0.242279	Srrm1	17	0.150199	0.845542	0.719674						SNRPD1		ACTN1
Kcnj10	2	2.2996	0.00555951	0.00415959	Rps26	4	-2.0784	0.00758072	0.00112857	Rps26	4	-0.974951	0.121558	0.0614404	Rps14	10	0.100402	0.927844	0.817752	Qki	20	0.149847	0.509869	0.287618						SNRPC		XRCC6
Dctn4	8	2.29232	0.00539963	0.00400743	Mcm6	3	-2.08577	0.0268908	0.0078689	Mcm6	3	-1.65124	0.0463739	0.0167103	Cdc16	2	0.0988154	0.937518	0.841024	Rsl1d1	26	0.149802	0.622538	0.421908						FXR1		XRCC5
Gnas	2	2.28804	0.0119368	0.0102686	Ldha	7	-2.08855	0.039337	0.0145129	Ldha	7	0.238266	0.73068	0.636142	Ssr1	2	0.0982468	0.682174	0.411047	Gtpbp1	6	0.149455	0.941351	0.89844						FXR2		RNH1
Rsl1d1	13	2.28484	0.00468016	0.00336634	Hnrnpd	14	-2.11858	0.0167133	0.00412276	Hnrnpd	14	-1.60962	0.0554523	0.0214568	Cct4	22	0.0975817	0.508471	0.17358	Mcm5	22	0.148781	0.383334	0.169897						FMR1		EEF2
Aif1l	3	2.2831	0.00707027	0.00557103	Actg1	26	-2.1198	0.041816	0.0159275	Actg1	26	-0.831944	0.536746	0.423816	Rbms2	3	0.0975053	0.661261	0.375601	Fubp1	18	0.148777	0.965252	0.935689						MEPCE		PDIA4
Rps10	7	2.27924	0.0114644	0.00976363	Dpysl3	2	-2.12223	0.476143	0.381721	Dpysl3	2	-3.62989	0.0716527	0.0303246	Cdkn2aip	7	0.0972789	0.659272	0.372	Pabpn1	8	0.147753	0.399111	0.185342						KAT8		TPT1
Hmga2	2	2.27855	0.00458667	0.00328804	Luc7l2	19	-2.12851	0.0222258	0.00607381	Luc7l2	19	-1.84021	0.0276596	0.00846175	Decr1	8	0.0970952	0.908251	0.781015	Ikbkap	3	0.147145	0.686401	0.502506						CIRBP		APEH
Mybbp1a	9	2.27803	0.00353644	0.00238603	Tubb4b	8	-2.1332	0.0064192	0.00082698	Tubb4b	8	-1.00734	0.0900102	0.0403794	Nars	11	0.0967656	0.939519	0.847676	Rab21	3	0.147062	0.96241	0.930878						RBM3		PRKAR2A
Rpl23a	9	2.27589	0.00441051	0.00310861	Gnai2	7	-2.15004	0.0148921	0.00335359	Gnai2	7	-0.365711	0.571189	0.456005	Atp1a1	4	0.0958379	0.636283	0.345914	Iqgap1	7	0.145802	0.586326	0.375244						CNOT7		ENO3
Kif21b	13	2.26689	0.00452602	0.00323365	Gnb2	2	-2.15518	0.00613919	0.000716634	Gnb2	2	-0.233889	0.451001	0.329934	Mtpap	4	0.0957374	0.657986	0.369977	Pigk	2	0.145557	0.671319	0.475441						CNOT8		FDPS
Tmod2	15	2.25962	0.00595818	0.00455119	Eno1	27	-2.16967	0.0538954	0.0222229	Eno1	27	-1.03706	0.525087	0.407129	Ssrp1	4	0.095678	0.6546	0.362563	Slc25a4	14	0.145482	0.218738	0.0657461						A1CF		ATP1B2
Ncl	16	2.25567	0.00501703	0.00368117	Eef2	21	-2.21379	0.0739057	0.035233	Eef2	21	0.257021	0.7625	0.670299	Srrm1	13	0.0956439	0.560159	0.228275	Nfya	3	0.144164	0.350806	0.146419						RBM46		PKM
Glipr2	2	2.25109	0.00515678	0.00380856	Upf1	2	-2.25033	0.0130176	0.00259721	Upf1	2	-2.0147	0.0227547	0.00624584	Mrps22	2	0.0955243	0.957944	0.878723	Rfc2	4	0.143343	0.940669	0.895779						RBM47		HSP90B1
Ddx24	2	2.24653	0.00436759	0.00306257	Lsm4	2	-2.27657	0.0167133	0.00410662	Lsm4	2	-2.62413	0.013066	0.00262268	Lyar	15	0.0948649	0.595032	0.287362	Rpl13a	13	0.142896	0.480154	0.26054						DND1		SNRPB
Aco2	2	2.24564	0.00645583	0.0050091	Actr3	4	-2.29059	0.326605	0.238931	Actr3	4	0.270412	0.396269	0.277916	Ssb	15	0.0942844	0.584061	0.270657	Taok1	5	0.141314	0.575919	0.365077						HNRNPR		HNRNPL
Actr1a	2	2.24557	0.00260432	0.00162221	Rbm14	8	-2.30198	0.0254234	0.00725505	Rbm14	8	-0.160239	0.845552	0.778646	Rplp1	4	0.0942635	0.927844	0.817341	Ddx6	8	0.140914	0.383334	0.170191						SYNCRIP		DARS
Twf1	9	2.24506	0.0114965	0.00980662	Aars	3	-2.30374	0.022984	0.00637165	Aars	3	-0.116479	0.806608	0.72663	Ccar1	15	0.0932028	0.788419	0.579174	Olig1	4	0.14085	0.833171	0.703637						ABCE1		GSPT1
Rpl13	20	2.24437	0.00586762	0.0044608	Vim	45	-2.30935	0.00569999	0.00064099	Vim	45	-0.400821	0.371687	0.252136	Nop58	19	0.0924111	0.924293	0.806067	Lclat1	3	0.139665	0.915872	0.836287						GPATCH4		EZR
Ppp1ca	12	2.24191	0.0173565	0.0155791	Ncln	2	-2.3181	0.268055	0.185402	Ncln	2	-0.364093	0.59363	0.480933	Gar1	6	0.0921022	0.628946	0.338233	Tmem35a	2	0.138558	0.550112	0.331478						PAIP1		NME1
Tom1l2	10	2.24041	0.0110607	0.00934166	Eif4g1	4	-2.32655	0.0531894	0.0217388	Eif4g1	4	-1.83976	0.0750141	0.0322007	Hdac1	6	0.0897648	0.684273	0.41563	Actb	33	0.138389	0.431261	0.215631						RBM20		NQO1
Mtss1l	5	2.22884	0.00555951	0.00415614	Ywhae	2	-2.33234	0.0322546	0.0110376	Ywhae	2	-1.97335	0.0465458	0.0168285	Dnm1l	7	0.089292	0.98211	0.945865	Mybbp1a	55	0.138337	0.350879	0.146949						GNL3		RPS2
Itpr2	9	2.22606	0.00866992	0.00702995	Eif5a	5	-2.34561	0.0157812	0.00365633	Eif5a	5	-3.90311	0.023089	0.00642138	Rab2a	4	0.0890473	0.560159	0.229333	Pycr2	5	0.138314	0.412274	0.201145						GNL3L		DSP
Atp5o	3	2.2258	0.0133712	0.0116797	Gatm	6	-2.3553	0.0159983	0.00379396	Gatm	6	-2.32629	0.0929067	0.0421897	Nsun2	18	0.0870236	0.848343	0.684831	Naa15	6	0.136685	0.37173	0.160712						FAM120A		GATA1
Fip1l1	2	2.21025	0.00333929	0.00224493	Hsp90aa1	12	-2.36001	0.0178503	0.00457588	Hsp90aa1	12	-1.50534	0.137824	0.0714952	Pdcd11	10	0.0869074	0.876607	0.727291	Capn2	3	0.136636	0.242515	0.0787657						FAM120B		ALOX15
Arhgap11a	2	2.20996	0.0121726	0.0104861	Arglu1	2	-2.36984	0.0177341	0.00446034	Arglu1	2	-4.28215	0.00480549	0.000356182	Spcs3	2	0.0867431	0.769554	0.548882	Hp1bp3	32	0.136197	0.505162	0.283524						FAM120C		CD44
Npm1	8	2.20183	0.00454017	0.00324923	Atp5a1	18	-2.37619	0.00500402	0.000544573	Atp5a1	18	-0.919699	0.160808	0.08614	Vdac3	14	0.0860494	0.899957	0.7588	Ddrgk1	3	0.13551	0.671319	0.475912						KHDC1		H2AFX
Limch1	23	2.20125	0.00553129	0.00411181	Cfl1	12	-2.38467	0.0944087	0.0491249	Cfl1	12	-0.425767	0.827598	0.754545	Gapdh	26	0.0858273	0.737366	0.489833	Nova1	4	0.13529	0.489513	0.271603						KHDC1L		PECAM1
Nf2	5	2.19944	0.00353644	0.00238449	Gdi2	4	-2.42867	0.278694	0.194445	Gdi2	4	0.596573	0.669087	0.568765	Nono	45	0.0844592	0.770892	0.555326	Rpl11	13	0.134899	0.530594	0.311781						RPL10L		GCFC2
Txlna	2	2.19215	0.00952639	0.00786214	Trim28	5	-2.45932	0.0780693	0.0379993	Trim28	5	-2.38379	0.117429	0.0590511	Mcm2	14	0.0843252	0.770207	0.552646	Cyb5r3	7	0.134895	0.474394	0.255443						RPL10		HIST1H1B
Hmgn1	8	2.19203	0.0128289	0.0110978	Rtn1	3	-2.46934	0.0706711	0.0333245	Rtn1	3	1.46058	0.834658	0.765019	Ddx3x	36	0.0842987	0.671962	0.397075	Emc2	12	0.134719	0.367285	0.157918						EIF2S1		HIST1H1D
Tpm3	16	2.18802	0.00727674	0.00574249	Hnrnph1	12	-2.47853	0.00813041	0.00127806	Hnrnph1	12	-0.378239	0.880312	0.820702	Sf3b4	3	0.0837081	0.967166	0.913872	Rab5c	6	0.13366	0.619759	0.418911						MRPL20		HIST1H1C
Coro1c	35	2.18785	0.00246975	0.0014997	Lsm14a	4	-2.50836	0.0111832	0.00205543	Lsm14a	4	-1.32808	0.22601	0.131999	Actr2	5	0.0828692	0.9735	0.927212	Mthfd1l	14	0.132809	0.397582	0.183823						EPRS		POR
Phka1	2	2.18376	0.00285468	0.00182287	Hspa9	5	-2.52155	0.0159983	0.00381097	Hspa9	5	-2.88429	0.0201617	0.00529033	Ssr4	7	0.0826055	0.657986	0.370321	Rpl7a	30	0.13216	0.432953	0.217402						DHX58		ATP2A2
Mylk	4	2.18221	0.00554253	0.00412685	Serbp1	6	-2.55146	0.0255297	0.00732608	Serbp1	6	-1.40482	0.0875328	0.0390564	Xrcc6	3	0.0816621	0.60258	0.298768	Bdh1	3	0.132069	0.964278	0.934059						DDX58		YBX3
Hist1h4a	10	2.17327	0.00707027	0.00556254	Rnps1	3	-2.56293	0.00379845	0.000284246	Rnps1	3	-1.6911	0.0138387	0.00287534	Yars	16	0.0816402	0.837734	0.662339	Rfc3	6	0.131891	0.530671	0.314369						IFIH1		ZNF16
Chchd3	17	2.17279	0.00640641	0.00495532	Ap2m1	2	-2.56805	0.0417553	0.0158539	Ap2m1	2	-4.16739	0.00675437	0.000824899	Atp13a1	16	0.0814587	0.937535	0.844583	Rpl3	32	0.13148	0.542816	0.325535						CDK5RAP1		ZNF22
Ddx56	2	2.16698	0.00578324	0.00436879	Tuba1b	24	-2.56885	0.0064192	0.000829385	Tuba1b	24	-1.34472	0.104589	0.049658	Rsl1d1	23	0.0806932	0.669114	0.386557	Snrpa1	3	0.131268	0.555811	0.337287						HABP4		HMGA
Myo5a	106	2.16175	0.00656207	0.00513106	Plec	3	-2.57211	0.0522443	0.0210367	Plec	3	-4.66582	0.0126631	0.00250905	Rac1	5	0.0804884	0.933522	0.830186	Cpsf6	4	0.130553	0.517352	0.298104						SERBP1		ZNF7
Lima1	24	2.15896	0.00746059	0.00590555	Tpm3	8	-2.57841	0.0141441	0.00301902	Tpm3	8	-2.38223	0.0414704	0.0144419	Fen1	8	0.0801886	0.869725	0.719112	Psmc4	5	0.127101	0.799124	0.660814						METTL5		UBTF
Ebna1bp2	3	2.15724	0.0109846	0.00923768	Cse1l	4	-2.59537	0.0296424	0.00926146	Cse1l	4	-1.71523	0.105798	0.0509162	Hsd17b4	26	0.0792888	0.684273	0.416197	Ruvbl2	7	0.126184	0.917859	0.838756						ZCCHC7		HOXB6
Arhgef40	3	2.15672	0.00806272	0.00645989	Ywhaz	8	-2.59827	0.0133489	0.00277628	Ywhaz	8	-0.739848	0.405274	0.286681	H1f0	9	0.0792202	0.769554	0.549865	Tuba1b	30	0.125895	0.867571	0.756305						WDR36		TAT
Uqcrc2	3	2.15147	0.00420555	0.00290842	Nedd8	3	-2.60756	0.0147664	0.00327969	Nedd8	3	-2.92091	0.0119816	0.00224565	Rpl23a	18	0.0783262	0.788419	0.579704	Ssr3	6	0.125514	0.414783	0.204142						CCDC86		DDX5
Top2a	4	2.1506	0.00465803	0.00334481	Tubb2b	5	-2.62948	0.0045816	0.000428751	Tubb2b	5	-2.09358	0.0398924	0.0134582	Stx5	3	0.077739	0.837734	0.66188	Caprin1	15	0.125499	0.971269	0.949824						C2orf15		LGALS3
Ppp1r12c	16	2.14236	0.0115004	0.00983767	Psat1	2	-2.64511	0.217117	0.142557	Psat1	2	0.372628	0.86889	0.807952	Mrto4	4	0.0773049	0.995552	0.977635	Atp13a1	12	0.124466	0.446713	0.232583						MRPL30		SPI1
Plec	146	2.13562	0.00444382	0.0031428	Tuba1c	2	-2.64808	0.012391	0.00238232	Tuba1c	2	-1.74714	0.0669343	0.0275183	Hepacam	6	0.0761325	0.799809	0.596593	Pon2	4	0.121637	0.410118	0.19933						RPS26		TCP1
Pa2g4	4	2.12969	0.00976004	0.00810201	U2af1l4	2	-2.67349	0.00850086	0.00139781	U2af1l4	2	-1.20993	0.0929067	0.0422405	Hcfc1	3	0.074851	0.671255	0.394282	Prpf38a	6	0.120546	0.773545	0.623134						TEX13A		PTPN1
Specc1l	34	2.12943	0.00649078	0.00504404	Tubb4a	2	-2.6853	0.0322546	0.0108045	Tubb4a	2	-2.6649	0.0427472	0.015145	Atp5j	5	0.0747859	0.608459	0.308404	Sfxn3	5	0.119889	0.33696	0.13824						BARD1		RPL35A
Ssfa2	7	2.12891	0.00497238	0.00364242	Rpl38	5	-2.71769	0.00379845	0.000253395	Rpl38	5	-3.51768	0.00338664	0.000163804	Eif3l	8	0.0747746	0.829782	0.632864	Etfa	8	0.119682	0.454349	0.238501						XPO4		RPL7
Rpl7	20	2.12791	0.00636492	0.00490789	Srsf3	8	-2.72963	0.00951498	0.00162226	Srsf3	8	0.159901	0.731539	0.637775	Rbbp4	5	0.0745835	0.743977	0.500561	Mrps16	2	0.117234	0.561563	0.346039						RUVBL1		SON
Sec61b	2	2.12525	0.00363289	0.00246423	Cct2	10	-2.74145	0.00588684	0.000669809	Cct2	10	-0.720022	0.376237	0.256905	Tor1aip1	7	0.0733136	0.566329	0.251574	Sec31a	11	0.117202	0.772691	0.619127						IMP4		NELFE
Gja1	9	2.12111	0.0119232	0.0102424	Tubb5	27	-2.78182	0.0064192	0.000831551	Tubb5	27	-1.03405	0.153132	0.0807324	Sdha	21	0.0729718	0.967044	0.912824	Dclk2	13	0.11643	0.383819	0.173497						DDX52		RPL17
Mark3	12	2.11866	0.00695554	0.00545549	Pgk1	2	-2.81501	0.100972	0.0543322	Pgk1	2	-2.61463	0.198306	0.111982	Dnaja2	7	0.0722831	0.608892	0.313737	Sacm1l	14	0.116055	0.797052	0.655127						THOC1		RCC1
Mpp5	2	2.11447	0.00205822	0.00119278	Puf60	4	-2.82484	0.00435001	0.000394499	Puf60	4	-4.05494	0.00348925	0.000185717	Eloc	3	0.0720089	0.951412	0.867007	Atrx	3	0.115554	0.922086	0.849186						TRPT1		NCL
Znf706	2	2.11269	0.00514687	0.00379504	Rab1A	3	-2.86337	0.00613919	0.000720074	Rab1A	3	-0.32359	0.52497	0.406264	Srp68	13	0.0687902	0.998278	0.989929	Arl8a	2	0.115445	0.285232	0.105641						NHP2L1		POLR2C
Lrch3	10	2.11117	0.00967767	0.00802197	Poldip3	4	-2.91958	0.0262157	0.00760794	Poldip3	4	-4.50246	0.006781	0.000836351	Dek	9	0.0680449	0.671871	0.395779	Rhot1	2	0.1151	0.728213	0.558607						EIF2B2		POLR2E
Dock7	44	2.1081	0.00928736	0.00764249	Sbds	2	-2.94527	0.0316112	0.010244	Sbds	2	-1.15147	0.261107	0.159758	Rpl8	20	0.0674041	0.957949	0.883162	Ntn1	9	0.114495	0.618811	0.417389						RNF113B		TRIM21
Sipa1	13	2.10761	0.00692942	0.00542665	Kpnb1	2	-2.96813	0.106452	0.0581816	Kpnb1	2	-1.82713	0.206423	0.117681	Cdc23	3	0.0669423	0.927844	0.818531	Fbl	17	0.113914	0.625582	0.427303						RNF113A		EIF2AK2
Ckap5	5	2.1066	0.00632229	0.00485978	Hist1h3b	2	-2.98295	0.0609412	0.0268967	Hist1h3b	2	3.26453	0.381482	0.262471	Pbrm1	5	0.0667101	0.584944	0.278117	Gtf2f1	2	0.11309	0.486145	0.268003						INTS10		TFE3
Tpm1	3	2.10348	0.00696207	0.005469	Psmd3	4	-2.9944	0.00909289	0.00151731	Psmd3	4	0.452744	0.528721	0.414282	Iqgap1	11	0.0659117	0.659272	0.372449	Eif5a2	4	0.111251	0.565412	0.356						LENG9		WT1
Clasp2	14	2.09957	0.00590899	0.00449937	Srrm2	4	-3.08123	0.00615531	0.000736215	Srrm2	4	-3.13967	0.0102261	0.00175093	Ndufa10	6	0.0657856	0.651842	0.359924	Dnajb11	2	0.110554	0.95251	0.915197						RPS29		CSNK2A2
Hist3h2a	8	2.09879	0.0131873	0.0114873	Nova1	3	-3.1567	0.0430763	0.0165638	Nova1	3	-4.77616	0.00348925	0.00018495	Rap1a	4	0.0651823	0.746878	0.503729	Nsf	3	0.109747	0.596089	0.388198						NOP16		NCF2
Ran	4	2.07906	0.0158952	0.0141333	U2af2	8	-3.17682	0.00523251	0.000582093	U2af2	8	-3.08818	0.00561447	0.000534488	Rpl9	15	0.0633437	0.560159	0.233649	Eif2s3x	15	0.109135	0.686401	0.498727						U2AF1		EIF2S2
Luzp1	5	2.07759	0.00490222	0.0035733	Tpm4	4	-3.20587	0.0159983	0.00378615	Tpm4	4	-4.04731	0.00633368	0.000750545	Atp1a2	47	0.0628279	0.74299	0.498315	Ncln	15	0.107747	0.359477	0.152827						U2AF1L4		TCN1
Cdc42bpb	2	2.07707	0.00632229	0.00485712	Tmem263	2	-3.22419	0.00296531	0.000155476	Tmem263	2	-2.33458	0.00701365	0.000890488	Gpd2	17	0.0625697	0.661261	0.375754	Tra2a	8	0.10766	0.446713	0.23256						RANBP6		ANXA7
Cuedc1	2	2.07689	0.0146134	0.0129055	Rbbp7	4	-3.25551	0.00496686	0.000522511	Rbbp7	4	-3.34809	0.0054547	0.000442706	Pum2	6	0.0612037	0.98078	0.941498	Eif2ak2	14	0.10763	0.394401	0.181148						IPO5		BTF3
Arpc1b	12	2.07211	0.00477884	0.00346034	Hnrnpc	13	-3.30405	0.00236785	7.51592e-05	Hnrnpc	13	-4.00894	0.00206196	4.19643e-05	Etfb	4	0.0598507	0.766332	0.54023	Znf326	14	0.106995	0.808931	0.671805						THOC7		PSMB1
Mark2	4	2.06939	0.00847365	0.00684017	Tnpo1	2	-3.35635	0.0190949	0.00503349	Tnpo1	2	0.393985	0.567633	0.451635	Polr2c	3	0.0582515	0.608459	0.307929	Rdh11	6	0.106958	0.747648	0.588426						DNMT3B		OGN
Magi1	4	2.06805	0.00445231	0.00315953	Psmc2	3	-3.44835	0.00588684	0.000676239	Psmc2	3	-0.720778	0.104589	0.049702	Spcs2	8	0.0582443	0.584944	0.278478	Cpsf7	3	0.10524	0.428817	0.214103						GFM1		CAST
Rps7	4	2.06451	0.00642718	0.00497913	Stmn1	2	-3.46721	0.00186858	5.36106e-05	Stmn1	2	-2.44804	0.00974329	0.00160228	Por	16	0.0577633	0.9759	0.93088	Srp9	2	0.104909	0.891869	0.801666						RNASE9		EFNA1
Lrrfip1	12	2.06271	0.0128394	0.0111224	Hdlbp	22	-3.48394	0.00271157	0.000114758	Hdlbp	22	-2.45585	0.00691862	0.000870057	Tcerg1	5	0.0562548	0.966086	0.901634	Ndrg3	4	0.104239	0.441621	0.225681						PLRG1		IMPDH1
Myo18a	87	2.05975	0.00594398	0.00453318	Acaca	64	-3.51785	0.00245599	8.61716e-05	Acaca	64	-2.31003	0.0134816	0.00273951	Abcf1	13	0.0554398	0.929705	0.823399	Ei24	4	0.103828	0.452183	0.236398						REXO1		CDK11B
Nop58	4	2.05546	0.00855358	0.0069253	Cct7	6	-3.52779	0.0552957	0.0232015	Cct7	6	0.0470664	0.7625	0.668538	Srp14	5	0.0549686	0.559571	0.22339	Acaa1a	3	0.103708	0.873954	0.765998						ZC3HAV1L		ENDOU
Dbnl	4	2.04881	0.00908628	0.00745076	Luc7l	2	-3.55825	0.400018	0.309083	Luc7l	2	-3.66369	0.319069	0.204868	Hmgb2	18	0.0546507	0.740825	0.495811	Scd2	4	0.103551	0.654856	0.458026						LSM14A		CSRP1
Lzts2	8	2.04824	0.00656207	0.00512353	Raly	9	-3.56038	0.00435001	0.00039433	Raly	9	-4.95875	0.00237846	7.10457e-05	Eci2	4	0.0535883	0.866095	0.712423	Rbms2	2	0.103322	0.564253	0.353989						LSM14B		FLNA
Tpm4	7	2.04335	0.00767411	0.00611155	Hspd1	18	-3.65552	0.0380955	0.0139243	Hspd1	18	-2.47702	0.0945527	0.0431032	Msi1	8	0.0533247	0.901824	0.761654	Clptm1	7	0.103244	0.359642	0.153181						LUZP4		ACO1
Abce1	2	2.0407	0.0040482	0.00278009	Xrn2	3	-3.66484	0.00394125	0.000314537	Xrn2	3	-4.00101	0.0026447	0.000111997	Vmp1	2	0.0532529	0.848343	0.681494	Khsrp	29	0.103067	0.710244	0.533572						TDRD6		MDK
Nolc1	7	2.03886	0.00774062	0.00617384	Qdpr	2	-3.69518	0.0401931	0.0149692	Qdpr	2	-1.32808	0.580301	0.466627	Asna1	4	0.0526189	0.757554	0.522675	Map2k1	5	0.102281	0.973439	0.9555						TDRD15		LPO
Lrch2	6	2.03788	0.0140251	0.0123354	NA	11	-3.71254	0.00309639	0.000168485	NA	11	-1.81502	0.0498564	0.0186283	Apoe	18	0.0518344	0.655913	0.364296	Prdx1	6	0.102249	0.706328	0.526732						MRPS22		FBL
Calm1	12	2.02926	0.0110785	0.00937003	Anxa2	2	-3.79514	0.0710859	0.0336949	Anxa2	2	-2.61684	0.162524	0.087256	Atp1b2	8	0.0510314	0.942554	0.852245	Hnrnpu	58	0.101853	0.489513	0.271269						EEF1B2		RPS4Y1
Phldb1	18	2.02377	0.00867674	0.00704593	Ppp2r1a	8	-3.817	0.0214642	0.00576184	Ppp2r1a	8	-2.39926	0.0669343	0.0273398	Ncaph	3	0.0510216	0.60258	0.294396	Mogs	4	0.101757	0.686401	0.49638						EEF1D		PAICS
Ssh1	5	2.021	0.00512244	0.00377086	Cand1	3	-3.88351	0.00478802	0.000474749	Cand1	3	-2.94415	0.0247957	0.00698596	Emc1	25	0.0509114	0.94299	0.853309	Eif2a	4	0.101673	0.510864	0.288544						SIDT1		UBA1
Hspd1	10	2.01805	0.0055434	0.00413417	Gpi	3	-3.96192	0.0110123	0.00198347	Gpi	3	-1.37085	0.32343	0.209674	Rbm25	13	0.0503741	0.879307	0.732028	Mta2	3	0.101401	0.863101	0.746914						SIDT2		HIST1H1T
Crip2	2	2.01776	0.0276923	0.0256237	Cpsf6	2	-3.96554	0.00651026	0.000904416	Cpsf6	2	-3.71061	0.00480549	0.000353268	Lman1	12	0.0498669	0.674084	0.399606	Dnaja2	5	0.100959	0.745524	0.58397						TRMT44		HNRNPA2B1
Cirbp	5	2.01466	0.0201668	0.0183445	Atp5d	2	-3.97659	0.00389548	0.000306174	Atp5d	2	-1.70941	0.0196195	0.00493468	Chd4	44	0.049562	0.963185	0.895509	Glipr2	2	0.100679	0.927091	0.858583						GPATCH8		TCEA1
Peak1	6	2.01456	0.00890165	0.00727146	Vcl	2	-4.07249	0.0142637	0.00313264	Vcl	2	-3.89261	0.0134816	0.00275501	Tomm22	3	0.0492618	0.737366	0.488762	Snx3	8	0.100231	0.715268	0.540527						WDR4		SFPQ
Tjp2	55	2.01415	0.0102867	0.00860118	Sptan1	3	-4.07934	0.0045816	0.000432122	Sptan1	3	-2.75488	0.0120602	0.00227778	Ik	8	0.0485767	0.869271	0.71812	Smc1a	27	0.0992175	0.972439	0.952233						SLIRP		PPIB
Usp54	4	2.00802	0.00908628	0.00745513	Set	3	-4.22363	0.00626533	0.000780326	Set	3	-1.813	0.0474275	0.017262	Tecr	9	0.0484677	0.967166	0.914998	Asna1	4	0.0990962	0.510944	0.290045						ATXN1		WARS
Mark1	2	2.00802	0.0169891	0.0152083	Mccc1	18	-4.34717	0.00213753	6.4617e-05	Mccc1	18	-3.78956	0.00229006	5.26132e-05	Psmc1	9	0.0479981	0.837453	0.658681	H2afy	12	0.0989489	0.397582	0.184279						ATXN1L		RPS3
Pdlim5	7	2.00053	0.017752	0.0159768	Pc	28	-4.34885	0.000870206	1.75198e-05	Pc	28	-2.93874	0.00582146	0.000600581	H2afy	12	0.0467882	0.623403	0.329621	Ube2n	3	0.0982088	0.99278	0.992073						YTHDF1		PTPRZ1
Svil	43	1.99545	0.0132454	0.0115538	Pcca	26	-4.37751	0.00175093	4.44615e-05	Pcca	26	-3.85978	0.00237846	6.50599e-05	Tufm	13	0.0458991	0.924293	0.810795	Eif6	3	0.0979042	0.441621	0.228278						YTHDF2		CFL1
Spire1	3	1.99342	0.00937773	0.00772816	Pccb	15	-4.48425	0.00186858	5.31012e-05	Pccb	15	-3.36008	0.00301585	0.000137327	Smc3	34	0.0458698	0.696169	0.426398	Znf22	7	0.0978373	0.603683	0.396436						YTHDF3		EIF4B
Shroom2	14	1.99031	0.00890165	0.00726814	Phb2	2	-4.50836	0.0133489	0.0027856	Phb2	2	-1.89564	0.194873	0.109572	Psmd4	4	0.0441846	0.97155	0.924222	Srsf7	10	0.0971597	0.83361	0.704769						LRPPRC		LAMA2
Map7d1	3	1.97669	0.00427952	0.00297504	Ldhb	3	-4.53421	0.0271944	0.0080235	Ldhb	3	-2.9379	0.0548457	0.021106	Trip12	35	0.0420909	0.987542	0.954453	Hars	6	0.0960413	0.66172	0.466289						TFIP11		EEF1B2
Dclk1	2	1.9723	0.0144185	0.012716	Hspa1b	3	-4.57742	0.0102213	0.00177073	Hspa1b	3	-3.48887	0.0173367	0.00418103	Rab11b	2	0.0412892	0.947243	0.859174	Magt1	4	0.0951792	0.561262	0.344992						ILF2		TBXAS1
Flot1	3	1.97081	0.0432842	0.0405202	Mccc2	22	-4.64527	0.000870206	1.76789e-05	Mccc2	22	-4.25842	0.00206196	2.48923e-05	Sox3	4	0.0406426	0.682659	0.413762	Pak3	2	0.0946974	0.919719	0.845041						STRBP		ACAT1
Amotl1	16	1.96715	0.00765494	0.00608706	Dhx30	2	-4.66347	0.00105908	2.4332e-05	Dhx30	2	-6.50029	0.0269484	0.00802187	Serbp1	17	0.0404663	0.723325	0.466083	Pgap1	7	0.0946534	0.48003	0.259162						ILF3		POLR2A
Slain2	3	1.96581	0.0361084	0.0336721	Tagln2	2	-4.68877	0.0148921	0.00336737	Tagln2	2	-2.88486	0.0367427	0.0123068	Psmc2	14	0.0404635	0.998492	0.998352	Abcf1	11	0.0942972	0.648298	0.451131						TCERG1		AZGP1
U2surp	16	1.96325	0.0114644	0.00976549	Prdx6	2	-4.76372	0.00832731	0.00134929	Prdx6	2	-2.09857	0.0678617	0.0281458	Top2a	2	0.0396789	0.6822	0.41291	Bub3	5	0.0939393	0.747648	0.588305						NXF5		RPS12
Dennd2a	28	1.95487	0.0153608	0.0136211	Nrdc	2	-4.90615	0.00478802	0.000471263	Nrdc	2	-4.27459	0.00877673	0.00136904	Agpat5	5	0.0391539	0.951412	0.866783	Ctbp1	5	0.0923573	0.939546	0.889232						NXF2B		BRD2
Baiap2	10	1.94618	0.0250809	0.0230866	Ptbp1	19	-5.00537	0.000450386	5.88547e-06	Ptbp1	19	-4.06084	0.00237846	6.05875e-05	Rpl23	15	0.0374993	0.836658	0.656638	Rpl28	15	0.0922507	0.68232	0.490878						NXF2		YY1
Lzts3	3	1.94184	0.0148256	0.0131287	Matr3	27	-5.05077	0.000870206	1.82421e-05	Matr3	27	-4.26803	0.00256581	9.92817e-05	Rplp2	6	0.0368944	0.771438	0.559799	Dhx30	10	0.0903967	0.517512	0.299033						NXF1		ATP5A1
Atp5h	2	1.93223	0.00315635	0.00209378	Hnrnpk	33	-5.0688	0.000743075	1.0943e-05	Hnrnpk	33	-3.71807	0.0026447	0.000115126	Agpat3	8	0.0363641	0.969637	0.919687	Tdg	3	0.0897614	0.750212	0.592453						NXF3		PSMA1
Sipa1l3	32	1.93157	0.0114182	0.00969862	Slirp	4	-5.08385	0.00433166	0.000377121	Slirp	4	-3.8776	0.00627115	0.000711751	Srrt	9	0.0360691	0.958157	0.884034	Rpl17	16	0.0894213	0.676631	0.485305						ZRSR1		PSMA4
Cybrd1	2	1.92998	0.0139798	0.0122787	Nasp	2	-5.11887	0.0710859	0.0336469	Nasp	2	-1.91963	0.297572	0.188262	Snrpg	4	0.0358116	0.933556	0.831521	Rpl10a	13	0.08918	0.407344	0.196128						ZRSR2		PTX3
Mprip	32	1.92269	0.00832878	0.00671319	Tln1	3	-5.2042	0.0878011	0.0443783	Tln1	3	-4.61244	0.127406	0.0649281	Slc1a2	4	0.0353064	0.565457	0.246409	Adarb1	5	0.0891497	0.686401	0.497957						MRPL35		MSN
Kiaa1211	34	1.92263	0.015983	0.0142306	Ass1	2	-5.24935	0.0064192	0.000856132	Ass1	2	-3.45672	0.0214322	0.00570143	Emc10	5	0.0344821	0.829782	0.634557	Xpo5	3	0.0873025	0.79122	0.646952						RRS1		DDX6
Arhgap12	7	1.91267	0.0074771	0.00593663	Hist1h1c	2	-5.25007	0.520506	0.422951	Hist1h1c	2	-6.29598	0.756961	0.662684	Tp53bp1	2	0.0344561	0.628946	0.339237	Rpl9	13	0.0864484	0.883621	0.782294						PRKDC		DNMT1
Hist1h3a	8	1.91093	0.0113189	0.00960064	Ddb1	2	-5.42812	0.0137596	0.00289501	Ddb1	2	-3.74326	0.0311181	0.00991914	Dkc1	10	0.0336296	0.6822	0.412999	Cdk1	4	0.0863295	0.382671	0.168168						NOC2L		U2AF2
Tprn	9	1.90741	0.0164426	0.0146597	Skp1	2	-5.45002	0.00379845	0.000273217	Skp1	2	-4.55587	0.00548226	0.000484173	Dlat	7	0.0328302	0.776218	0.56553	Pigs	3	0.0860022	0.480154	0.261799						MTIF3		RPL13
Inf2	4	1.90499	0.0122113	0.0105341	Pdia3	2	-5.47791	0.0040694	0.000334606	Pdia3	2	-5.12454	0.0054547	0.00046276	Myef2	49	0.0323675	0.810345	0.607327	Nfia	7	0.0857248	0.721401	0.549676						NOL11		ELAVL4
Hadha	5	1.90408	0.0238151	0.0217779	Phb	3	-5.52291	0.128334	0.07309	Phb	3	0.825484	0.741531	0.648279	Lsm2	4	0.0311873	0.760265	0.528487	Eml4	2	0.0856588	0.417139	0.205658						EXOSC3		S100A4
Ddx46	4	1.90352	0.00634909	0.00488803	Pdcd6ip	2	-5.52462	0.00648105	0.000877724	Pdcd6ip	2	-3.78973	0.0136035	0.00279636	Arpc1b	2	0.0307686	0.766986	0.541686	Xrn2	3	0.0854132	0.833718	0.705806						PNPT1		HMGB2
Akap2	15	1.90275	0.0136468	0.011958	Elavl1	18	-5.63749	0.00236785	7.74056e-05	Elavl1	18	-6.07526	0.00206196	4.26052e-05	Hist1h3a	11	0.0301629	0.642118	0.352276	Tubb2b	9	0.0848277	0.99278	0.988452						TSNAX		PTBP1
Cttnbp2nl	10	1.8991	0.00991632	0.00826193	Cbx3	2	-5.65318	0.00389548	0.00030451	Cbx3	2	-4.46393	0.0056175	0.00057058	Srp9	2	0.0287485	0.697423	0.431125	Anxa2	2	0.084648	0.413423	0.202453						RIOK1		TARS
Pawr	4	1.8925	0.00890165	0.00726808	Flna	2	-5.75131	0.00327217	0.000182007	Flna	2	-5.91188	0.00413556	0.000285038	Gsk3b	5	0.0275141	0.655913	0.365764	Tjp1	24	0.0844428	0.956904	0.921463						RIOK3		VARS
Specc1	49	1.89106	0.00991632	0.00826758	Nolc1	2	-5.80288	0.00354809	0.000214516	Nolc1	2	-6.0663	0.0401147	0.0136037	Slc6a11	4	0.0270841	0.857243	0.697841	Mrps26	3	0.0842942	0.81466	0.678303						PIWIL1		EEF1G
Hmga1	3	1.88914	0.016817	0.015034	Cacybp	3	-5.89408	0.00379845	0.000277627	Cacybp	3	-5.82053	0.00561447	0.000542051	Gtpbp1	7	0.0267378	0.903657	0.770047	Emc8	9	0.0839804	0.711412	0.535079						PIWIL2		ZFP36
Supt16h	5	1.88597	0.0144185	0.0127056	Ptbp3	6	-5.94702	0.000743075	1.16807e-05	Ptbp3	6	-4.85436	0.00237846	8.597e-05	Kdm1a	2	0.0258585	0.795884	0.58884	Atp2a2	38	0.0818043	0.625932	0.427988						PIWIL3		FKBP2
Rbm28	2	1.87963	0.0199222	0.018098	Lrpprc	42	-5.97417	0.000450386	5.25117e-06	Lrpprc	42	-5.23742	0.00192024	1.44917e-05	Prpf31	7	0.025763	0.566329	0.2523	Abhd12	11	0.0814611	0.410118	0.198993						PIWIL4		AK4
Rpl22	2	1.87562	0.0276985	0.0256629	Lmna	2	-6.00083	0.00354809	0.00021261	Lmna	2	-4.64251	0.00729663	0.000969129	Vcp	10	0.0248961	0.841866	0.668593	Guf1	3	0.0811191	0.7417	0.576095						PEG10		MAPK3
Vim	69	1.86941	0.0189153	0.017115	Tia1	2	-6.00748	0.016852	0.00417734	Tia1	2	-4.98983	0.0329797	0.0106875	Lrrc40	3	0.0242104	0.721931	0.454473	Repin1	3	0.0805988	0.394401	0.181373						ZCCHC5		RPL10
Clip2	5	1.86707	0.0102095	0.0085243	Dis3l2	4	-6.01998	0.000450386	5.99063e-06	Dis3l2	4	-5.20497	0.00206196	3.12426e-05	Mrps5	3	0.0241984	0.929705	0.822457	Rps6ka1	8	0.0801054	0.951985	0.913336						POP7		APEX1
Rpl12	5	1.86554	0.0223522	0.0203863	Elavl4	2	-6.03084	0.00729393	0.00106719	Elavl4	2	-4.84752	0.0288352	0.00885627	Clic1	3	0.0239437	0.771438	0.5601	Hnrnpul2	27	0.0789275	0.96759	0.941828						FASTKD3		CALR
Kiaa1671	2	1.86262	0.0195055	0.0176959	Eif4b	3	-6.24697	0.0284206	0.00852274	Eif4b	3	-2.44584	0.391161	0.273064	Eif2s3x	18	0.0223581	0.924293	0.808095	Mbd3	3	0.0788142	0.480154	0.26101						TBRG4		MAP4
Utp14a	2	1.85733	0.0447921	0.0420398	Ptbp2	17	-6.32253	0.000397058	3.80741e-06	Ptbp2	17	-5.2912	0.00206196	2.60213e-05	Tomm40	4	0.0219955	0.933522	0.83042	Rab31	3	0.0769947	0.924589	0.852149						FASTK		CANX
Tjp1	110	1.84895	0.0174947	0.0157242	Mcm7	2	-6.33064	0.00236785	8.01691e-05	Mcm7	2	-3.33849	0.0744428	0.0317755	Ubtf	4	0.0210198	0.957944	0.877228	Apoe	19	0.0764387	0.715268	0.540426						TRMT13		CST5
Prpf38a	2	1.84649	0.0079757	0.00638056	Tpi1	2	-6.43752	0.0142637	0.00313034	Tpi1	2	-3.97233	0.0776825	0.0338576	Ncan	8	0.0184227	0.6822	0.412415	Cdkn2aip	5	0.0761952	0.862228	0.742474						IREB2		ERCC5
Sipa1l1	26	1.84561	0.00874844	0.00711469	Pcbp1	16	-6.6723	0.000397058	3.84095e-06	Pcbp1	16	-5.18019	0.00206196	4.48795e-05	Vapa	12	0.0181955	0.799449	0.595023	Ap2a1	12	0.0761812	0.527048	0.308195						ACO1		GRN
Arpc3	3	1.84208	0.0188489	0.0170321	Asph	2	-6.82397	0.00379845	0.000273231	Asph	2	-6.16254	0.00368616	0.000245149	Rpl13	21	0.0181032	0.995273	0.971969	Rack1	3	0.0756196	0.686401	0.500809						ZCCHC3		GTF2E1
Ppp1r12b	25	1.84088	0.00985864	0.00819574	Pcbp2	11	-6.82603	0.000137299	9.96126e-07	Pcbp2	11	-5.49652	0.00192024	1.62535e-05	Mepce	2	0.0170967	0.723325	0.464773	Gfap	55	0.0754449	0.589331	0.378788						SNUPN		GTF2E2
Tubb4b	12	1.83174	0.0504515	0.0475946	Pgm1	4	-6.9797	0.00379845	0.000284769	Pgm1	4	-4.9305	0.0109662	0.00194926	Pura	7	0.0168629	0.770892	0.554969	Emc3	8	0.0752432	0.939546	0.888177						PTRHD1		TPP2
Cttn	22	1.82621	0.0129738	0.0112544	Cpeb2	2	-7.07128	0.00704636	0.00100541	Cpeb2	2	-7.13615	0.00319841	0.000150832	Nfib	8	0.0167164	0.933522	0.829857	Myl6	6	0.0749195	0.557809	0.340089						HARS		EPHA8
Afdn	21	1.82567	0.0116812	0.0100205	Actn1	2	-7.10168	0.00618583	0.000755464	Actn1	2	-4.75709	0.0259838	0.00757207	Csde1	38	0.0150413	0.572065	0.255785	Tex10	2	0.0743484	0.614669	0.407591						HARS2		KDM5A
Efhd2	14	1.81165	0.065972	0.0627927	Tufm	2	-7.20558	0.00268655	0.000103954	Tufm	2	-5.61565	0.00549339	0.000498191	Capn2	3	0.014801	0.584061	0.270154	Ipo5	4	0.0734027	0.883363	0.780949						HNRNPK		TKT
Gigyf2	4	1.80906	0.0239203	0.0219029											Eif4g2	7	0.0147307	0.737366	0.4892	Tmem229a	4	0.0732011	0.744289	0.579952						PCBP1		RBMS1
Arhgap42	5	1.80364	0.0134054	0.0117257											Ndufv1	14	0.0145566	0.951412	0.866356	Gng5	2	0.073089	0.801837	0.665342						PCBP2		EEF1D
Amot	20	1.798	0.0115097	0.00985951											Map1s	14	0.0134153	0.964038	0.896986	Macf1	17	0.0722264	0.84891	0.727254						PCBP3		OAS2
Nhsl1	4	1.79669	0.00967767	0.00802104											Rpl27	16	0.0127624	0.782167	0.572886	Myo1b	11	0.0708078	0.903191	0.821492						PCBP4		PBLD
Dbn1	34	1.78065	0.0237755	0.0217131											Fads1	12	0.011865	0.957944	0.878967	Rpn2	17	0.0706366	0.541043	0.323701						AQR		ERP29
Arhgap21	29	1.76713	0.0110286	0.00929289											Cct8	16	0.0111445	0.979348	0.937644	Eri1	4	0.0705146	0.927091	0.856212						ICT1		C21orf33
Myo19	2	1.76255	0.0156462	0.0138931											Pbxip1	26	0.00883678	0.765604	0.538477	Psmc6	9	0.0661975	0.402276	0.188489						UNK		BLVRB
Ppp1r12a	65	1.74069	0.0171185	0.0153448											Ssr3	6	0.00866012	0.903657	0.767936	Ccdc47	19	0.0656976	0.469845	0.251831						UNKL		PRDX3
Eef1a1	17	1.73953	0.0430686	0.0402665											Ndufs7	5	0.00857791	0.623239	0.326381	Cox6a1	2	0.0648989	0.903191	0.821085						CEBPZ		RPL12
Ppp1r9b	36	1.73411	0.0266091	0.0245894											Emc7	9	0.00609991	0.995552	0.980205	Gldc	9	0.0644467	0.74526	0.582301						MRPS9		PEBP1
Fau	3	1.72775	0.0540929	0.0512254											Eefsec	2	0.00488226	0.97155	0.924662	Flna	13	0.0640615	0.624123	0.425417						THG1L		PDIA3
Ppp1r18	24	1.72605	0.024449	0.022446											Kif1b	2	0.00301458	0.837453	0.659145	Rpl36	4	0.0633241	0.716938	0.542299						ZCCHC13		PPIF
Nes	62	1.72499	0.0252622	0.0233142											Tmed10	9	0.00282092	0.848343	0.685177	Myo6	29	0.0627837	0.864755	0.752102						CNBP		NKTR
Hspa5	21	1.70655	0.0760816	0.07269											Macf1	21	0.00129963	0.903657	0.77067	Tecr	11	0.0621725	0.468665	0.250021						SRRT		NMT1
Triobp	8	1.68351	0.0311532	0.0289012											Psmd11	8	0.00127863	0.688251	0.420441	Emc7	5	0.0610577	0.951815	0.912495						CD2BP2		ADSL
Marcks	3	1.66368	0.0841345	0.080688											Eif3a	51	0.0010267	0.924293	0.806906	Nop58	17	0.0609957	0.819832	0.686974						SNRPG		POLR2B
Ablim1	2	1.65548	0.0250133	0.0229941											Tars	2	0.00099574	0.811846	0.610161	Nup210	5	0.0609053	0.940669	0.893273						APTX		CORO1A
Cdh13	2	1.64557	0.0459901	0.043275											Bzw1	2	0.000830178	0.595032	0.287629	Vim	69	0.0607977	0.465358	0.247594						RPL17		MAT2A
Ppp1cc	3	1.64418	0.0723936	0.0690792											Elob	2	0.00033807	0.737366	0.48896	Ugp2	4	0.0605173	0.628751	0.430942						BMS1		FGF9
Sorbs2	3	1.64255	0.033725	0.0313683											Msh6	13	-0.00063908	0.760265	0.528816	Canx	29	0.0605141	0.617131	0.413081						SARS		TIA1
Rps18	15	1.60565	0.0510188	0.0481912											Mcm5	26	-0.000819511	0.829782	0.641472	Elp3	6	0.0605122	0.859403	0.739377						SARS2		DNAJA1
Ckap2	2	1.58143	0.0443814	0.0416008											Ythdf1	2	-0.00103922	0.980388	0.939336	Ddx3x	36	0.0603788	0.616097	0.410731						PAIP2		HIBADH
Pbxip1	4	1.56306	0.078	0.0746168											Srgap2	14	-0.00170477	0.842013	0.669308	Tmem33	5	0.0600345	0.491325	0.274123						PAIP2B		APOBEC3A
Coro1b	13	1.55738	0.0241603	0.0221518											Rnps1	6	-0.00179449	0.821539	0.620381	Slc27a1	16	0.0579954	0.622878	0.423021						GEMIN4		HNRNPH3
Fgd6	3	1.52283	0.045664	0.0429132											Eloa	2	-0.00213303	0.937518	0.842419	Rpl5	20	0.0578491	0.540004	0.32231						PNRC2		HNRNPH1
Actn4	36	1.48242	0.0323972	0.0300943											Dhrs13	4	-0.00246162	0.98078	0.943042	Anp32b	6	0.0575637	0.595201	0.385778						FASTKD2		YWHAB
Rps24	5	1.46932	0.0475523	0.0448023											Idh3a	13	-0.00317633	0.995552	0.97892	Ralb	4	0.0574959	0.721401	0.55016						GEMIN6		STIP1
Eps8	14	1.44949	0.0589679	0.055984											Cap1	7	-0.00332846	0.721931	0.453222	Hbs1l	3	0.0574212	0.619759	0.418535						DDX20		FCGR2B
Gapdh	5	1.43765	0.117537	0.113713											Apool	2	-0.00346262	0.937535	0.845046	Snu13	3	0.056908	0.530671	0.312275						DDX39A		GBP2
Hsp90ab1	10	1.37772	0.0561111	0.0532041											Rpl6	22	-0.0039523	0.829782	0.640826	Pspc1	10	0.055567	0.884251	0.785306						DDX39B		HPD
Rps29	4	1.37488	0.125702	0.122067											Sacm1l	17	-0.00410497	0.911351	0.785914	Psmd14	2	0.0553057	0.897564	0.81302						DHX37		RPL9
Mcat	2	1.36815	0.28423	0.279574											Mtch2	5	-0.00485869	0.688251	0.420571	Eif5b	14	0.0546408	0.99278	0.989711						ZNF346		CSTF2
Hdac1	2	1.34661	0.0824261	0.0789503											Slc1a3	8	-0.00499711	0.791107	0.582241	Sec22b	13	0.0545338	0.420951	0.209576						MRPL50		DUT
Lasp1	2	1.34252	0.0664637	0.0633407											Gatad2b	9	-0.00743792	0.903657	0.763983	H2afx	3	0.0534723	0.84436	0.718067						RNASE1		RNASE4
Snrnp27	3	1.33347	0.0641859	0.0610153											Srpk2	3	-0.00775465	0.967044	0.908716	Gsk3b	3	0.0534432	0.772691	0.619143						RNASE2		CD68
Aurkb	3	1.30665	0.0540685	0.0511371											Mcm4	15	-0.0083128	0.937518	0.842062	Srgap2	11	0.0533576	0.833718	0.706048						RNASE3		SHMT1
Top1	4	1.18204	0.233848	0.228777											Snrnp70	19	-0.00837791	0.858475	0.702733	Ikbip	5	0.0501741	0.684586	0.493448						RNASE4		CTNNA1
Fyn	2	1.14907	0.112691	0.108889											Ddx17	25	-0.00854708	0.963185	0.893184	Cpt1a	6	0.0501249	0.752346	0.596411						RNASE6		RDX
Ppp1cb	4	1.13518	0.104801	0.10114											Psmd3	15	-0.00912473	0.998278	0.994382	Rpl27	15	0.0494652	0.686401	0.497735						RNASE7		RPA3
Marcksl1	2	1.135	0.28423	0.279778											Smoc1	2	-0.00928757	0.903657	0.774056	Mthfd1	10	0.0483911	0.621758	0.420705						RNASE8		RFC1
Apoe	2	1.04552	0.2556	0.250981											Prkcb	2	-0.0095313	0.559571	0.218432	Drg1	7	0.0479811	0.833171	0.703804						ANG		RPL22
Poldip3	14	1.02415	0.173231	0.168431											Sf3b6	3	-0.00968351	0.893381	0.74816	Epb41l2	14	0.047565	0.592179	0.381711						DYNC1H1		GTF2F1
Ndufa7	2	1.0096	0.103869	0.100115											Rpl7a	28	-0.00982284	0.998492	0.998135	Emc10	4	0.0464924	0.99278	0.987098						FTSJ3		SPR
Map4	17	0.989859	0.205664	0.20046											Ccar2	19	-0.0100129	0.836658	0.655731	Pros1	2	0.0459769	0.552749	0.334642						SF3B2		FAU
Rbm3	3	0.927878	0.249657	0.244845											Smarca4	12	-0.0113487	0.848343	0.680407	Nmt1	8	0.0453123	0.878063	0.773355						CTU2		MSX2
Hspa9	6	0.910811	0.236619	0.231773											Cbx5	2	-0.0117488	0.795884	0.589556	Sec61g	2	0.04483	0.410118	0.198929						XPOT		FBN1
Map2	24	0.800415	0.346786	0.342608											Mtss1l	8	-0.0124998	0.722212	0.456237	Mcm6	16	0.0447504	0.95925	0.924405						RBMXL1		MYH9
Canx	2	0.569483	0.125547	0.121766											Acadl	6	-0.0127284	0.866803	0.715466	Cox6b1	5	0.0431542	0.562885	0.351602						RBMXL2		ADD1
Mrpl14	5	0.55578	0.540156	0.536251											Atp5j2	3	-0.0127594	0.848954	0.686273	Rpl14	10	0.0418479	0.460435	0.243335						RBMXL3		FUS
Flot2	6	0.422874	0.748253	0.744646											Usp10	5	-0.0141672	0.917253	0.795637	Pnpt1	3	0.0411404	0.813449	0.676716						RBMY1A1		NUP214
D8Ertd738e	3	0.354192	0.471283	0.467309											Rps27a	9	-0.014199	0.697015	0.428391	Fmnl2	10	0.0405086	0.897564	0.814456						RBMY1B		DEK
NA	10	-0.0164953	0.93239	0.931267											Lonp2	5	-0.0158577	0.760265	0.528895	Arpc2	2	0.0403541	0.534136	0.318047						RBMY1D		SOX11
Atp5f1	3	-0.372899	0.881881	0.878693											Sulf2	15	-0.0166179	0.722212	0.456733	Csnk1d	4	0.0392689	0.983862	0.973259						RBMY1E		ZNF93
Plod3	6	-0.501074	0.470124	0.465593											Gspt1	4	-0.0180288	0.674088	0.401465	Arcn1	5	0.0375404	0.962104	0.929729						RBMY1F		PSMC2
Grn	2	-0.55131	0.401453	0.397099											Tjp1	28	-0.0180584	0.967044	0.90823	Ufl1	4	0.0367219	0.598773	0.391932						RBMY1J		CHI3L1
Brwd3	2	-0.624304	0.335285	0.330841											Emc3	7	-0.0182382	0.924293	0.810376	RtcA	12	0.0364145	0.686401	0.500691						RBMX		ATP5C1
Ckb	11	-1.02572	0.293705	0.289458											Tubb6	8	-0.0188124	0.924293	0.806133	Uso1	4	0.0358928	0.99278	0.987886						PPP1R10		RPL4
Chtf8	3	-1.11049	0.103295	0.0994372											Rps26	5	-0.0190804	0.754177	0.518664	Thrap3	54	0.0355439	0.68232	0.491329						PRR3		NUDT1
P4hb	4	-1.96852	0.0104626	0.00876087											Cct3	26	-0.0194606	0.887854	0.741664	Rpl7l1	3	0.0347779	0.622878	0.424125						DKC1		LONP1
Plod1	3	-2.418	0.00531193	0.00393594											Ap2m1	16	-0.0196064	0.99776	0.984305	Mcm7	13	0.0347375	0.784342	0.636984						MRPL17		PPP1CC
Colgalt1	6	-2.47292	0.00199927	0.00113934											Dus3l	10	-0.0198279	0.628946	0.339693	Bclaf1	52	0.0346546	0.864489	0.751051						TRA2A		GNL1
P4ha1	5	-2.66292	0.00130476	0.000663207											Hmgb1	13	-0.0201661	0.998278	0.990047	Smarca5	32	0.0336599	0.978535	0.963753						TRA2B		POLR2I
															Skp1	4	-0.0206509	0.829782	0.633451	Tmpo(lap2b)	19	0.0316495	0.940839	0.684413						RPL26L1		GPX4
															Bax	2	-0.0215464	0.771438	0.556511	Csnk2a1	12	0.0313111	0.770533	0.613573						RPL26		SRP14
															Stx12	3	-0.0231629	0.628946	0.336673	Raver1	3	0.0312743	0.722113	0.551871						AUH		NUP62
															Ktn1	32	-0.0234173	0.903657	0.772319	Mrps33	2	0.0309719	0.873954	0.766006						EIF3C		PPARG
															Tmpo(lap2b)	27	-0.0236718	0.967044	0.339354	Kpnb1	6	0.0300674	0.66172	0.46754						EIF3CL		TAGLN2
															Srpk1	2	-0.0236824	0.848343	0.680686	Snrpa	7	0.0299686	0.889531	0.794495						SCAF8		RBMX
															Hmgn2	11	-0.0245041	0.957732	0.875033	Psmc3	6	0.0298388	0.9358	0.882912						SCAF4		BRCA1
															Ddx42	10	-0.0247001	0.578233	0.263878	Rplp0	16	0.0293053	0.686401	0.496544						EEF2K		COIL
															Cspg5	3	-0.0250729	0.782167	0.57203	Trim9	3	0.0292626	0.873954	0.766266						RPL6		HSPA9
															Colgalt1	2	-0.0251926	0.866803	0.714866	Rexo4	5	0.0290848	0.983862	0.974051						MRPL11		EIF4A3
															Hp1bp3	32	-0.0259384	0.878134	0.729804	Mark2	3	0.0285483	0.934276	0.87901						G3BP1		IGHMBP2
															Prpf3	10	-0.0277279	0.837734	0.661394	Camk2b	11	0.0283318	0.784342	0.638896						G3BP2		RPS19
															Api5	6	-0.028397	0.584185	0.274939	Atad1	8	0.0283034	0.919448	0.843482						MRPS26		RPL3
															Letm1	5	-0.0293226	0.662272	0.379314	Gtpbp4	7	0.0274257	0.797052	0.655532						SF3B5		ANP32A
															Mki67	3	-0.0299324	0.883772	0.736999	Map1a	19	0.0267621	0.960653	0.927125						DHX34		FEN1
															Celf1	7	-0.0300983	0.942554	0.852204	Tubb6	9	0.0253656	0.629022	0.432764						UTP23		IL6ST
															Gfap	57	-0.0316523	0.741643	0.496885	Pbxip1	19	0.0253602	0.862432	0.743693						SNRNP48		CCT6A
															Naa15	11	-0.0348202	0.697015	0.428993	Dap3	5	0.0249559	0.949794	0.909881						PRPF38B		RPL13A
															Rhoa	8	-0.0349611	0.937518	0.843034	Rpl4	38	0.0239912	0.614951	0.408493						HEXIM1		MDH1
															Clasp2	26	-0.0355238	0.917253	0.796167	Prpf38b	3	0.0239495	0.515211	0.296136						HEXIM2		MDH2
															Ap1m1	5	-0.0364183	0.836658	0.655387	Ddx18	7	0.0236163	0.617131	0.414058						SRRM2		EIF2S3
															Snx3	7	-0.0378122	0.673182	0.398462	Mest	8	0.0231061	0.796136	0.652673						SRRM3		EIF2D
															Rrbp1	85	-0.0384491	0.995273	0.971879	Ddx17	20	0.0230488	0.696512	0.514447						PIH1D3		BUD31
															Smarcd3	2	-0.0398978	0.716412	0.444389	Acsbg1	16	0.0229772	0.616173	0.411413						DHX40		NAA10
															Tomm70	10	-0.0403328	0.907077	0.777679	Rbm10	6	0.0223854	0.972439	0.953045						DHX38		APOBEC1
															Ptdss2	2	-0.040983	0.933522	0.827784	Srsf3	15	0.021864	0.771036	0.615071						TRMT61B		GARS
															Rab14	3	-0.042044	0.986178	0.950482	Sart3	18	0.0214112	0.932747	0.867826						CSDC2		IARS
															Mta2	6	-0.0426943	0.608459	0.310589	Eif3i	7	0.0213938	0.891869	0.801099						CARHSP1		EIF1
															Top2b	28	-0.0430802	0.9735	0.927899	Vapa	10	0.0205527	0.909388	0.829719						POP4		Tmpo(lap2a)
															Soga1	20	-0.0438805	0.937535	0.843909	Ctnna1	5	0.0202539	0.962444	0.931597						LARP6		Tmpo(lap2b)
															Cand1	7	-0.0449142	0.581652	0.26754	Dhx29	2	0.0201589	0.885028	0.787952						RNPC3		SKIV2L2
															Ewsr1	8	-0.0453656	0.834869	0.651778	Fkbp3	9	0.0200587	0.680268	0.488398						RPL30		MLLT3
															Hnrnpf	16	-0.0457018	0.722212	0.458075	Ccar2	18	0.0195497	0.692783	0.510476						RUVBL2		RPS27
															Mtdh	21	-0.0457422	0.992737	0.96385	Rps2	20	0.0191323	0.99278	0.991125						DRG1		FRK
															Sf3b3	18	-0.0459739	0.727028	0.473486	Sox2	4	0.0186219	0.7417	0.57635						TRIM25		HELZ
															Ndufs6	3	-0.046193	0.6822	0.412034	Iap	7	0.0163688	0.922086	0.848555						RQCD1		RBM34
															Rfc1	7	-0.0462239	0.987542	0.954032	Mepce	4	0.0149492	0.933905	0.873057						MRPS18C		LRPPRC
															Bcas2	3	-0.0462634	0.903657	0.77048	Mtdh	16	0.0147097	0.972439	0.952406						MRPL45		ACAA2
															Tmed4	5	-0.0463462	0.858475	0.702169	Fut8	3	0.0138618	0.730888	0.564304						RPLP2		RPL35
															Chchd3	12	-0.0465477	0.769554	0.551632	Tmed9	7	0.0130382	0.817827	0.682105						SRP19		CDKN2A
															Idh3g	7	-0.0476878	0.737366	0.489592	Sf3b6	3	0.0127325	0.99278	0.991729						RPS24		CTSO
															Pfkp	3	-0.0486712	0.837734	0.661891	Psmd13	3	0.0124338	0.859082	0.736977						AKAP17A		MATR3
															Nfia	5	-0.0486996	0.927844	0.817488	Trmt1l	4	0.0121644	0.732708	0.566753						NXT2		SSR1
															Rps6ka1	5	-0.048892	0.987688	0.955995	Rpl18a	19	0.0115929	0.558143	0.341851						NXT1		TSFM
															Atxn2	5	-0.0490239	0.845559	0.674527	Slc6a11	5	0.0110615	0.992776	0.984997						MRPL9		VDAC2
															Elovl5	3	-0.049261	0.934779	0.834945	Sccpdh	3	0.0103683	0.576267	0.366118						RPL27		MKI67
															Trap1	17	-0.0495123	0.908251	0.780601	Hip1	15	0.00929245	0.892834	0.803169						RPL24		RANGAP1
															Rfc5	7	-0.0502718	0.929705	0.823446	Apool	3	0.00927043	0.52778	0.308999						CNOT10		RECQL
															Psmd2	5	-0.0508174	0.967044	0.91108	Tcf4	2	0.00882843	0.867911	0.757258						ABT1		NOP2
															Immt	42	-0.051894	0.723325	0.462003	Anp32e	3	0.00808655	0.686401	0.502533						DDX25		GPR6
															Hmox2	5	-0.051903	0.608459	0.308136	Cse1l	4	0.00778881	0.710244	0.533695						DDX19A		CRKL
															Rplp0	18	-0.0523427	0.998492	0.998492	Hnrnpul1	23	0.00667342	0.919448	0.843464						DDX19B		MTIF2
															Farp1	8	-0.0526374	0.718533	0.44848	Rtn1	2	0.00650451	0.864755	0.752657						MRPS30		NSF
															Rps27l	2	-0.0527191	0.625701	0.333287	Zfp37	10	0.00636051	0.728323	0.559211						SMG1		RPL27A
															Myl6	5	-0.0529146	0.608459	0.312219	Rpl21	12	0.00621093	0.617659	0.415732						EXOSC5		RPL5
															Vars	26	-0.0535709	0.829782	0.632458	Rpl18	10	0.00547697	0.686401	0.501436						AIMP2		RPL21
															Mfap1a	3	-0.0535783	0.540157	0.201141	Psmd1	9	0.00509564	0.884251	0.784443						BZW2		RPL28
															Ap2a2	5	-0.053596	0.962651	0.890917	Ranbp2	2	0.00363438	0.617131	0.413539						BZW1		RPS9
															Hnrnph1	20	-0.0545944	0.755592	0.52071	Eif4g2	6	0.00301914	0.933905	0.873396						PARS2		RPS5
															Farsb	9	-0.0549522	0.832211	0.647932	Dnmt1	9	0.00284622	0.648298	0.451068						INTS12		RPS10
															Pds5a	13	-0.0565418	0.731092	0.478919	Sulf2	11	0.00213492	0.676631	0.485054						EIF3H		MAP1B
															Snrnp40	13	-0.0569955	0.895361	0.751112	Lxn	3	0.00141054	0.927091	0.856917						SKIV2L		YAP1
															Hmga1	5	-0.0590898	0.970329	0.92204	Eif4g1	12	-5.11181e-05	0.947683	0.907184						RC3H2		EIF1AX
															Elp3	5	-0.0593808	0.903657	0.774105	Ssb	15	-0.00035377	0.595567	0.38644						RC3H1		QARS
															Gtf2i	20	-0.0596139	0.848343	0.6851	Acbd5	2	-0.000754792	0.70519	0.523487						ZFP36		CDX1
															Ddx47	3	-0.0603774	0.896364	0.753615	Rbbp4	3	-0.000995209	0.927091	0.860193						ZFP36L1		RPL29
															Rpl27a	12	-0.0607566	0.998278	0.995478	Zbtb20	3	-0.00152955	0.877131	0.769676						ZFP36L2		ZFP36L2
															Isg20l2	3	-0.0608828	0.995552	0.979947	Ptges3	5	-0.002567	0.933905	0.874453						ANKHD1		IREB2
															Eif4a1	19	-0.0644626	0.957944	0.878384	Hnrnpa0	24	-0.00295112	0.801837	0.664902						ANKRD17		LEPR
															Cenpv	12	-0.065852	0.875617	0.724606	Lyar	17	-0.00324545	0.9358	0.882394						HELZ2		RFX5
															Slc25a18	15	-0.0660521	0.852166	0.690079	Rap1b	2	-0.00449682	0.517512	0.299302						UPF1		PIP4K2A
															Eif2s2	17	-0.0665107	0.797397	0.591964	Faf2	5	-0.00486342	0.778002	0.628387						DROSHA		SOX2
															Hyou1	5	-0.0666539	0.675701	0.404077	Fads1	10	-0.00571166	0.940669	0.895279						MRPL37		SOX9
															Ube2n	3	-0.066708	0.7516	0.509576	Preb	7	-0.00608314	0.826589	0.6953						PUS10		ARCN1
															Tmem229a	3	-0.0672232	0.834869	0.651217	Alyref	10	-0.0061712	0.557809	0.339779						NUDT16		GCLC
															Pds5b	27	-0.0676416	0.957949	0.880574	Gtf3c1	6	-0.00774558	0.786485	0.64252						NUDT16L1		PRRC2A
															Stoml2	6	-0.068079	0.841866	0.668542	Ik	4	-0.00842034	0.706328	0.52605						TRMT11		CCT5
															Trmt1l	2	-0.0681064	0.887813	0.740999	Nudcd2	3	-0.008456	0.9358	0.883144						PET112		PTDSS1
															Eif2a	6	-0.0684176	0.744257	0.501278	Ap3d1	4	-0.00878451	0.542999	0.326418						NUFIP1		IDH2
															Vdac2	18	-0.0692515	0.832211	0.646051	Sap18	10	-0.0110725	0.773014	0.621417						PURA		PXN
															Psip1	21	-0.0706053	0.910743	0.7847	Mlf2	2	-0.0115272	0.864489	0.751194						PURB		RPL34
															Ctbp1	7	-0.0708088	0.995273	0.973327	Magohb	6	-0.011979	0.629022	0.433472						PURG		FASN
															Arpc4	4	-0.0709265	0.967044	0.909477	Eef1g	12	-0.0121166	0.745524	0.585141						ZRANB2		DHPS
															Snw1	7	-0.0718266	0.668539	0.38575	Abcd3	22	-0.012394	0.672116	0.480505						THOC5		CCT3
															Gdpd1	2	-0.0721049	0.858475	0.701525	Ap2a2	5	-0.0125437	0.654822	0.456898						TSEN54		MRPL19
															Dock1	4	-0.0722209	0.671255	0.394513	Srrm2	35	-0.0125534	0.897564	0.812506						SRP9		ARRB1
															Acad9	3	-0.072665	0.947243	0.858627	Kif5b	8	-0.0164838	0.934276	0.879341						PIN4		TUFM
															Psmd14	5	-0.0733074	0.764155	0.535831	Prpf6	21	-0.0166489	0.881876	0.778865						ZC3H14		ALDH7A1
															Eif4g1	19	-0.0741802	0.893381	0.748817	Dazap1	7	-0.0168995	0.625582	0.426969						CNOT2		SRP9
															Fubp1	17	-0.0748043	0.559571	0.217684	Chd4	32	-0.0176164	0.96759	0.940321						TARBP1		AARS
															Skiv2l2	2	-0.0749202	0.795884	0.589711	Pds5a	9	-0.0180027	0.990973	0.982503						AGO1		CARS
															Smc1a	26	-0.0760239	0.656136	0.368349	Eif2s1	18	-0.0181641	0.660863	0.465052						AGO2		HARS2
															Rps6	23	-0.076707	0.98078	0.943888	Psmc5	9	-0.0183491	0.717468	0.543211						AGO3		SARS
															Nemf	7	-0.0769089	0.903657	0.764667	Farsb	3	-0.0185557	0.63704	0.440574						AGO4		PPM1F
															Cdc5l	29	-0.077287	0.997878	0.985194	Nop2	2	-0.0188261	0.927091	0.860302						LARP4B		PRIM1
															Flii	4	-0.0788522	0.829782	0.637792	Twf1	2	-0.0189483	0.721401	0.550814						LARP4		CSNK1E
															Sec31a	10	-0.0789733	0.731508	0.479711	Strbp	7	-0.0194255	0.897564	0.81227						SNW1		CTCF
															Rpl17	20	-0.0796762	0.998278	0.995939	Lrp1	2	-0.0200539	0.771699	0.616767						EZH2		YLPM1
															Eif3i	8	-0.0804303	0.770892	0.554281	Eftud2	33	-0.020774	0.68991	0.507604						EIF3B		TMED10
															Psmd8	4	-0.0835302	0.652639	0.360827	Paics	8	-0.020835	0.984533	0.975417						RPP30		RBM25
															Mgst1	6	-0.0845935	0.967044	0.907831	Dnaja1	4	-0.0210958	0.97958	0.966323						ZMAT3		CLK1
															Phgdh	15	-0.0852642	0.725456	0.468039	Cdc16	2	-0.0212717	0.967868	0.943217						PTGES3		CLK2
															Ptpn1	4	-0.0857004	0.98078	0.94098	Mapre1	3	-0.0226968	0.552541	0.333728						KARS		CLK3
															Asph	14	-0.0877408	0.560159	0.227331	Flii	2	-0.0231879	0.934144	0.876259						RAN		EIF2B2
															Rpl13a	16	-0.0879868	0.577918	0.262824	Smad3	2	-0.0232395	0.672116	0.477329						SNRPA		HINT1
															Sfxn1	12	-0.0884783	0.866803	0.715403	Htra1	2	-0.0236887	0.609214	0.401804						SNRPB2		NUP153
															Rab1A	8	-0.0887723	0.839074	0.663994	H2afz	3	-0.0256786	0.564253	0.354065						HEATR1		RANBP2
															Abce1	7	-0.0889275	0.995273	0.967956	Smchd1	13	-0.0257367	0.557809	0.3396						PTGES3L-AARSD1		STK19
															Trmt10c	4	-0.0890543	0.461939	0.138232	Timm10	2	-0.0264434	0.933905	0.871069						AARSD1		GMPS
															Cdk9	2	-0.0895984	0.924293	0.810717	Nemf	7	-0.0271856	0.797058	0.657626						CPSF3		GDI2
															Supt16h	15	-0.0903252	0.608459	0.30838	Pdlim5	8	-0.0283266	0.848006	0.724188						CPSF3L		SERPINH1
															Zranb2	2	-0.0905225	0.740825	0.495494	Ipo9	3	-0.0291786	0.96759	0.939342						CWC25		ST13
															Ei24	3	-0.0906796	0.765604	0.537551	Rhoa	5	-0.0301031	0.724893	0.554512						RPS5		VASP
															Eif3b	16	-0.090695	0.995273	0.974082	Fasn	31	-0.0301486	0.730847	0.563652						POLR2D		METAP2
															Acads	7	-0.0914614	0.903657	0.770421	Smc4	12	-0.0303208	0.7417	0.575448						C9orf114		TOB1
															Rab8b	3	-0.0925387	0.7516	0.511444	Map1s	5	-0.0305361	0.862983	0.746198						MRPL44		CDK9
															Bdh1	4	-0.0927306	0.80693	0.60305	Ap2b1	12	-0.0309394	0.934276	0.87971						ETF1		RNF144A
															Usp5	4	-0.0954344	0.565457	0.238604	Eci2	6	-0.0317012	0.8458	0.720496						GAR1		RPL14
															Thoc2	6	-0.0957311	0.636902	0.347155	Plec	2	-0.0318125	0.561657	0.346835						MVP		CCT4
															Abcd3	30	-0.0959991	0.998278	0.990308	Hspa4	3	-0.0319101	0.540122	0.322765						RPF2		ANXA11
															Copa	44	-0.0967585	0.531665	0.190205	Mtch1	2	-0.0340492	0.730847	0.562805						ZC3H18		PAPOLA
															Myo5a	37	-0.0975677	0.674084	0.400377	Dync1i2	3	-0.0350665	0.66204	0.468238						INTS5		FXR1
															Agap1	4	-0.0982862	0.639617	0.35045	Nxf1	16	-0.0356	0.934276	0.879377						INTS3		FXR2
															Pdha1	11	-0.0983085	0.747252	0.504885	Dclk1	2	-0.0360437	0.999064	0.999064						LSM6		DAP3
															Tubb5	4	-0.0984578	0.649744	0.357843	Zc3h13	9	-0.0363323	0.844127	0.717268						SNRPF		DUSP3
															Rpl29	9	-0.0989217	0.903657	0.773426	Poldip3	18	-0.0363463	0.927091	0.860399						TUT1		NOVA1
															Idh2	15	-0.098948	0.879307	0.731516	Eif3c	22	-0.0376377	0.599259	0.392677						MTPAP		IDH3G
															Ubr4	6	-0.099424	0.726805	0.472236	Msi2	13	-0.0384449	0.61403	0.406729						EIF2AK1		MECP2
															Eif3c	23	-0.0994904	0.995552	0.979975	Eef1d	12	-0.0426382	0.920116	0.846061						EIF2AK2		ALDH5A1
															Arl8a	3	-0.0995539	0.960233	0.887196	Kif1a	3	-0.0432984	0.745524	0.585601						EIF2AK3		AFF2
															Tmem214	3	-0.100234	0.656136	0.367089	Hdac1	5	-0.043802	0.750212	0.592582						EIF2AK4		AFF1
															Vim	72	-0.101359	0.60258	0.296764	Lpcat1	7	-0.0447424	0.967868	0.943741						MRPL22		AFF3
															Mtx1	2	-0.102366	0.680166	0.409355	Wdr18	2	-0.0458641	0.99278	0.989515						PES1		NR0B1
															Tmed1	4	-0.102878	0.853164	0.692098	Actn4	8	-0.0460808	0.597626	0.39033						LSM7		HDGF
															Rab6a	9	-0.106381	0.937518	0.842904	Dhrs1	4	-0.0467569	0.797058	0.658082						PAPD4		LUM
															Sart1	18	-0.108155	0.995273	0.973649	Prrc2a	21	-0.0473039	0.766031	0.608384						ZCCHC11		CNN1
															Rpl4	37	-0.109051	0.986456	0.95145	Syt11	4	-0.0478446	0.891869	0.798396						ZCCHC6		HNRNPA3
															Epb41l2	13	-0.109111	0.717547	0.44713	Tmed4	4	-0.0478763	0.729232	0.560428						KHDRBS1		HNRNPM
															Ufl1	5	-0.110752	0.656136	0.367899	Stt3b	17	-0.0480301	0.909388	0.828501						KHDRBS2		KPNA2
															Erlin2	16	-0.110995	0.723325	0.462096	Nop56	18	-0.0482787	0.84743	0.723092						KHDRBS3		KPNA1
															Dcakd	10	-0.111667	0.574778	0.26067	Actr3	4	-0.048312	0.529127	0.310211						QKI		NCBP2
															Abcf2	5	-0.111765	0.970329	0.922123	Mark3	17	-0.0488519	0.978535	0.963899						SF1		POLR2H
															Map2k1	5	-0.111981	0.760265	0.530928	Acsl3	10	-0.0500766	0.84891	0.726594						LRRC47		POLR2J
															Hnrnpc	23	-0.112807	0.757638	0.525239	Rpl22	10	-0.0512751	0.956904	0.921322						ISY1		AGFG1
															Itgav	8	-0.113284	0.577918	0.262914	Rpl24	12	-0.0530421	0.712804	0.537186						SRRM1		HNRNPF
															Prpf8	73	-0.113803	0.622001	0.324906	Rab1A	4	-0.0539619	0.750212	0.591947						IPO9		ZNF133
															Hexa	4	-0.114429	0.829782	0.639593	Lmnb1	35	-0.0547583	0.797052	0.656057						MTRF1		ZNF140
															Bud31	2	-0.114475	0.883748	0.736352	Umps	2	-0.0565177	0.940669	0.892765						MTRF1L		ZNF142
															Hist1h1c	25	-0.114913	0.810345	0.606999	Mbnl2	4	-0.0575936	0.515211	0.295708						WIBG		ZNF143
															Psmc6	15	-0.116145	0.967044	0.910263	Psmd7	2	-0.057957	0.698368	0.516813						PPAN		RBM5
															Srpra	3	-0.116445	0.934779	0.834402	Ctbp2	3	-0.0601399	0.745524	0.585693						FUBP3		HRSP12
															Eif3f	9	-0.116639	0.823981	0.62281	Ptpmt1	4	-0.0611386	0.786343	0.641844						FUBP1		MRPL12
															Lbr	12	-0.117261	0.995273	0.969573	Ddx19a	4	-0.0615984	0.973439	0.956799						KHSRP		CRIP2
															Smarcc2	6	-0.117304	0.636405	0.346432	Clasp2	24	-0.064747	0.848533	0.725242						CHTOP		NUP98
															Pmvk	2	-0.117316	0.7516	0.513058	Arpc4	3	-0.0657441	0.933905	0.874788						PTCD2		NKX2-5
															Slc4a4	11	-0.118658	0.829782	0.639181	Acaa2	2	-0.0663449	0.859082	0.737318						POLR2A		PPP5C
															Arcn1	6	-0.120342	0.723325	0.463011	Dis3	5	-0.0663481	0.797052	0.655329						MRPL43		SUCLG1
															Plrg1	5	-0.120876	0.502215	0.162534	Lemd2	3	-0.0667062	0.686401	0.498743						DDX55		COPB1
															Strap	11	-0.120909	0.608459	0.304557	Sart1	14	-0.0672584	0.895012	0.805766						RPS15		CRYBB1
															Ndufs8	4	-0.121017	0.740825	0.49483	Hnrnpd	26	-0.0688684	0.522384	0.304723						CPSF4		POLR2K
															Rbm3	9	-0.122685	0.829782	0.638386	Pnn	11	-0.0696133	0.942557	0.900263						CPSF4L		SUB1
															Rpl14	13	-0.1231	0.608459	0.305028	Dnm2	8	-0.0700796	0.517512	0.298823						CSTF2		POLG
															Psmd6	4	-0.124142	0.506681	0.168654	Cdc5l	22	-0.0724563	0.707055	0.52878						CSTF2T		CLNS1A
															Ddx46	13	-0.12433	0.924293	0.806754	Skp1	2	-0.0724606	0.784342	0.639093						RAVER2		BLM
															Egfr	4	-0.126125	0.498412	0.160595	Zc3h15	2	-0.0730477	0.560707	0.343853						RAVER1		RARS
															Sgpl1	25	-0.126552	0.624523	0.330656	Eif4a1	24	-0.075273	0.897564	0.813283						EIF1AX		HIRA
															Eif5b	14	-0.126691	0.893381	0.748792	Por	13	-0.0760194	0.707308	0.529474						EIF1AY		ATXN3
															Stt3b	19	-0.128566	0.969637	0.919055	Ddx50	15	-0.0761939	0.659493	0.463148						DALRD3		ATXN1
															Zcchc24	3	-0.13006	0.573409	0.257607	Chtop	9	-0.0765818	0.565412	0.35575						NSUN2		ATN1
															Marc2	8	-0.13034	0.595032	0.28711	Vars	19	-0.076898	0.862983	0.74585						URB2		PMS1
															Lmnb1	44	-0.13141	0.691058	0.422776	Lsm14a	12	-0.0772187	0.927091	0.858223						PHAX		YARS
															Xab2	7	-0.132878	0.559571	0.222207	Nes	8	-0.0778071	0.515473	0.296654						PPARGC1A		ALDH18A1
															Ppp2r1a	5	-0.133852	0.565457	0.244654	Mrps5	2	-0.0786936	0.943578	0.90191						PPARGC1B		EIF5
															Dync1h1	128	-0.134041	0.727028	0.473677	Sgpl1	24	-0.0794226	0.797052	0.656262						PPRC1		PSMD4
															Rfc2	6	-0.134421	0.962154	0.889771	Sars	5	-0.0795434	0.530671	0.312756						PHF5A		DRG2
															Csnk1d	9	-0.13569	0.574778	0.260052	Ruvbl1	6	-0.079882	0.879378	0.776032						MCTS1		CSE1L
															Rpl10	19	-0.136911	0.559571	0.21801	Iqgap2	2	-0.0802044	0.919448	0.843072						RRP7A		VCP
															Uqcrfs1	8	-0.136963	0.934715	0.833217	Cyfip1	7	-0.0802853	0.933905	0.874478						DGCR8		FGF8
															Fam162a	3	-0.136986	0.559571	0.220142	Dhx15	35	-0.0812128	0.672116	0.479044						ZC3H13		MFAP1
															Stat3	14	-0.137576	0.827675	0.627396	Tmed3	3	-0.0823956	0.795261	0.651389						UPF3A		HADHB
															Hnrnpm	55	-0.138263	0.608892	0.313722	Nhp2	3	-0.0824005	0.394401	0.181469						UPF3B		MANF
															Preb	9	-0.138289	0.992737	0.963512	Myo18a	10	-0.083369	0.721401	0.550624						RBM24		AFDN
															Znf22	9	-0.138367	0.730893	0.477915	Supt5h	3	-0.083728	0.66172	0.467441						RBM38		MLLT6
															Map4	35	-0.138986	0.963185	0.894462	Septin 7	21	-0.0852943	0.592449	0.383151						THOC3		ELL
															Rps3a	36	-0.139022	0.584061	0.271926	Zfr	24	-0.0860315	0.63972	0.442883						IGHMBP2		NAP1L1
															Rpn2	18	-0.13915	0.995552	0.977574	Ddx21	44	-0.0862822	0.799373	0.662159						PAPD5		GP2
															G3bp1	19	-0.13972	0.96527	0.899364	Cand1	4	-0.0864141	0.947683	0.906972						PAPD7		ADK
															Cyb5r3	11	-0.140959	0.967044	0.909422	Celf2	3	-0.092183	0.933905	0.87537						GFM2		ADAR
															Rpl3	37	-0.143112	0.565457	0.24572	Pds5b	22	-0.0956012	0.421851	0.210325						PHRF1		FOXA3
															Ctnnb1	6	-0.143125	0.767863	0.545515	Isg20l2	5	-0.0967294	0.629022	0.433684						VARS		TPD52
															Thyn1	7	-0.14339	0.560159	0.231895	Zc3h18	5	-0.0971605	0.68991	0.507445						VARS2		SNU13
															Umps	4	-0.143702	0.427025	0.118191	Srrt	7	-0.0974402	0.91911	0.84095						MRPL1		HNRNPH2
															Psmc3	9	-0.144294	0.558957	0.21065	Eloc	2	-0.0997141	0.672116	0.47897						INTS7		SH3BGR
															Rab21	2	-0.144474	0.903657	0.768399	Myh9	92	-0.0999165	0.629022	0.433105						ATXN2L		SUMO3
															Atp1b1	4	-0.144633	0.967044	0.912597	Snrnp200	40	-0.10111	0.628445	0.430153						ATXN2		EIF3B
															Impad1	6	-0.145053	0.697015	0.429883	Nat10	3	-0.101192	0.469709	0.250913						PPIL4		NDUFV3
															Hnrnpul2	39	-0.145261	0.848343	0.683136	Copa	37	-0.101692	0.441621	0.226143						PPIL3		RRP1
															Rab8a	2	-0.145929	0.565457	0.24305	Dnm1l	5	-0.10441	0.891869	0.79742						PPWD1		MARS
															Suclg1	5	-0.145943	0.858015	0.699078	Zmat2	2	-0.104774	0.859234	0.73806						CWC27		MAZ
															Ndufs4	5	-0.145995	0.933522	0.830828	Acadsb	2	-0.1054	0.933905	0.871552						PPIH		ATP5E
															Srsf7	10	-0.151322	0.933522	0.828916	Ap2m1	10	-0.105895	0.543282	0.326975						NUTF2		ATP5I
															Rpl15	15	-0.152802	0.722212	0.459263	Dkc1	9	-0.10596	0.592179	0.381304						MRPL18		EIF6
															Zbtb20	5	-0.1533	0.995273	0.97285	Impad1	2	-0.106063	0.784342	0.637744						LSM11		DSCR4
															Ndufb4	4	-0.153363	0.792724	0.584024	Rab6a	11	-0.106338	0.939546	0.890695						AARS2		RBM11
															Ndrg3	3	-0.153926	0.717547	0.446942	Cnn3	9	-0.107288	0.490042	0.272943						AARS		PRDM15
															Ndrg2	4	-0.154961	0.845559	0.673981	Clk3	2	-0.108535	0.784342	0.638607						MIF4GD		WDR4
															Cnn3	14	-0.15661	0.848343	0.684009	Eif3a	49	-0.10926	0.402684	0.189401						CTIF		GEMIN4
															Eif4h	4	-0.157178	0.608459	0.310003	Amer2	5	-0.110567	0.462013	0.245156						C9orf129		PCBP3
															Hist1h1d	3	-0.157727	0.559571	0.215293	Fyttd1	5	-0.110831	0.449481	0.234345						LUC7L2		PCBP4
															Soat1	4	-0.15814	0.957732	0.875486	Sptbn1	15	-0.111814	0.797058	0.658359						LUC7L3		RGS8
															Rps28	7	-0.161333	0.7516	0.512335	Lonp2	5	-0.113937	0.530671	0.315061						LUC7L		EEFSEC
															Mcm3	19	-0.161981	0.661831	0.377019	Sec23ip	2	-0.11405	0.397582	0.184349						DUS2		SESN2
															Exosc10	6	-0.162896	0.414894	0.104322	Dync1h1	102	-0.114804	0.441621	0.224616						RNF17		EPPK1
															Atxn10	12	-0.163044	0.848343	0.682012	Ran	16	-0.115153	0.835942	0.708526						TDRD1		ZNF121
															Hip1	14	-0.163403	0.391112	0.0879934	Tbl2	9	-0.116006	0.63294	0.436837						MRPS10		YBEY
															Snx2	2	-0.164127	0.728481	0.475658	Msh6	5	-0.118694	0.402276	0.187462						FAM103A1		NLRP11
															Fkbp8	8	-0.164308	0.436008	0.123024	Ppig	9	-0.11886	0.589331	0.379036						ENOX1		ZNF280A
															Tmed3	6	-0.165613	0.628946	0.337907	Csnk2a2	2	-0.118874	0.859403	0.73943						ENOX2		ELOF1
															Mfge8	4	-0.166097	0.832211	0.647727	Nop10	2	-0.118963	0.686401	0.499557						RBPMS		RNASE9
															Snrnp200	52	-0.166214	0.60258	0.298567	Chd6	2	-0.121642	0.629022	0.43224						RBPMS2		EIF3E
															Nup210	11	-0.166631	0.623239	0.32732	Top2b	17	-0.122514	0.616173	0.41166						NIP7		NANOS2
															Atp2a2	39	-0.167806	0.755592	0.520259	Eif2b4	3	-0.122519	0.466758	0.248672						RPL3		NANOS3
															Ppig	10	-0.169772	0.948469	0.86096	Tomm40	7	-0.124012	0.671319	0.476235						RPL3L		SEC61B
															Eftud2	38	-0.170353	0.560159	0.227041	Hsd17b10	9	-0.124226	0.712804	0.537649						RNASE11		EIF4A1
															Tbl3	2	-0.171951	0.979348	0.937003	Pdia6	7	-0.125301	0.96759	0.940611						RNASE12		RPS20
															Septin 7	19	-0.17371	0.467055	0.140879	Upf1	12	-0.125362	0.642192	0.445509						RPLP0		PSMA6
															Aqr	3	-0.173962	0.858794	0.70398	Acox1	17	-0.126435	0.474394	0.255331						RBM34		SRP54
															Nup214	4	-0.174943	0.507081	0.169965	Tars	3	-0.126575	0.515211	0.294787						CMTR2		UBE2M
															Snu13	3	-0.175643	0.771438	0.559252	Farsa	8	-0.126801	0.95251	0.914575						ENDOU		UBE2N
															Add1	12	-0.175832	0.662016	0.378228	Sptan1	4	-0.127642	0.971181	0.949046						PUM1		ZC3H6
															Ebna1bp2	3	-0.179831	0.671962	0.396466	Pgk1	6	-0.130513	0.793077	0.649035						PUM2		POLR2F
															Pdlim5	11	-0.180506	0.612052	0.316234	Septin 11	12	-0.131361	0.34511	0.142619						TYW5		ABCE1
															Snrpa	7	-0.18052	0.531665	0.189818	Trmt10c	3	-0.131765	0.76266	0.605131						TYW3		RPS3A
															Rpl32	9	-0.18185	0.583047	0.268971	Celf1	8	-0.13188	0.316496	0.124885						TRMT1		RPL26
															Actn4	13	-0.183251	0.599875	0.291635	Tjp2	5	-0.135169	0.891869	0.800908						RAE1		RPL15
															G3bp2	18	-0.183337	0.995273	0.97229	Ckap5	14	-0.135539	0.522241	0.303897						SLU7		MAGOH
															Pes1	2	-0.183804	0.960233	0.887313	Snrnp40	9	-0.136517	0.274271	0.0966983						EIF2B4		RPL27
															Eif5a2	5	-0.185057	0.540157	0.199979	Erh	10	-0.137744	0.96759	0.94209						EIF5B		RPL37A
															Ubxn4	3	-0.185712	0.85951	0.705176	Ddx39b	10	-0.138059	0.530671	0.315227						GPATCH1		ERVK-21
															Polr2j	2	-0.187914	0.529784	0.185744	Bckdk	3	-0.140574	0.686401	0.49905						RPL36		ERVK-19
															Caprin1	20	-0.189371	0.845034	0.672908	Ubtf	4	-0.140777	0.891869	0.800094						EEF1A1		ERVK-9
															Rpl37a	7	-0.190514	0.414894	0.102847	Ktn1	22	-0.14088	0.605739	0.398217						EEF1A2		HERVK_113
															Actr1a	3	-0.191002	0.363938	0.0744125	Kif2a	12	-0.141741	0.405192	0.193334						RRP8		ERVK-8
															Ube2m	3	-0.191066	0.417494	0.108789	Msh2	2	-0.142001	0.606824	0.399363						UBA52		HERV-K104
															Rpl28	15	-0.191463	0.46839	0.143113	G3bp1	14	-0.142388	0.383819	0.172294						R3HDM1		ERVK-16
															Smchd1	21	-0.192567	0.60258	0.300648	Trip12	26	-0.143296	0.483967	0.265664						R3HDM2		ERVK-25
															Sptan1	6	-0.193757	0.610251	0.31487	Glg1	12	-0.143653	0.686401	0.502578						PA2G4		HSPE1
															Ncl	50	-0.194171	0.354389	0.0641371	Ythdc1	6	-0.143793	0.592449	0.382788						AAR2		SEC61A1
															Nfix	3	-0.194525	0.581652	0.267285	Phgdh	13	-0.14448	0.891869	0.800319						ERI1		STXBP1
															Acadsb	3	-0.195347	0.697319	0.430566	Dlat	7	-0.145511	0.505357	0.284353						ERI2		RPL37
															Actb	33	-0.195543	0.506681	0.168637	Myo5a	22	-0.146523	0.293242	0.110728						ERI3		SUMO2
															Rpl7	28	-0.196249	0.671255	0.39109	Msi1	5	-0.146699	0.355576	0.150183						NIFK		WDR5
															Nmt2	3	-0.196473	0.903657	0.771911	Mtpap	2	-0.146811	0.350879	0.146855						METTL14		NUTF2
															Nup35	5	-0.198031	0.559571	0.221617	G3bp2	14	-0.148882	0.40675	0.195553						MRPL32		HNRNPK
															U2surp	22	-0.200122	0.766986	0.54217	Scfd1	2	-0.149353	0.460968	0.244274						CPSF6		YWHAG
															Nap1l1	4	-0.200322	0.659038	0.371381	Eif3b	14	-0.150343	0.562302	0.347634						CPSF7		RRAS2
															Gcn1	37	-0.200506	0.510279	0.174922	Rbm7	3	-0.150806	0.420951	0.209375						RPL7A		RPS7
															Gstp1	3	-0.200902	0.995552	0.98124	Atxn10	11	-0.151116	0.409763	0.197877						WDR46		PSMC1
															Nckap1	6	-0.20155	0.987688	0.956143	Ppp1cb	11	-0.152565	0.276399	0.0995503						SRP14		RPS8
															Sf3b1	40	-0.201894	0.560159	0.22765	Lmnb2	2	-0.154748	0.38619	0.176316						TFAM		RPS15A
															Srsf3	15	-0.203313	0.427874	0.119343	Clasp1	6	-0.158288	0.530671	0.314903						CMSS1		RPS16
															Zc3h18	5	-0.203565	0.924293	0.810806	Son	8	-0.160613	0.642111	0.444996						XPO6		YWHAE
															Tnpo1	11	-0.204146	0.723325	0.466131	Senp3	3	-0.162471	0.441621	0.227723						EXOSC1		RPS14
															Raly	16	-0.205029	0.408759	0.0957349	Fkbp5	2	-0.162978	0.519304	0.300708						ZNF106		RPS23
															Casc4	3	-0.206298	0.671255	0.390831	Hsp90ab1	42	-0.164646	0.455682	0.23985						UTP14A		RPS18
															Gnai2	18	-0.208253	0.829782	0.637244	Tdrkh	3	-0.164771	0.276399	0.0993997						UTP14C		RPS29
															Copb1	9	-0.209794	0.566329	0.250963	Hsd17b8	2	-0.165157	0.575525	0.364417						TRUB1		RPS13
															Ptrh2	3	-0.210699	0.721931	0.453929	Soga1	9	-0.165237	0.33169	0.133952						TRUB2		RPS11
															Rpl35a	16	-0.212055	0.424559	0.115234	Mcm4	15	-0.165964	0.512537	0.291961						PRIM1		SNRPE
															Prpf6	17	-0.212305	0.998278	0.991398	Cad	9	-0.166512	0.402684	0.190146						PTCD3		SNRPF
															Ap3b1	4	-0.212305	0.858226	0.699859	Eif3d	12	-0.166669	0.309912	0.120742						HNRNPA0		SNRPG
															Fus	14	-0.215362	0.757554	0.523674	Pdcd11	6	-0.167527	0.573649	0.362739						HNRNPA1		LSM3
															Brix1	5	-0.215425	0.866803	0.713781	Add3	13	-0.168141	0.40675	0.194932						HNRNPA1L2		LSM6
															Ndufs3	7	-0.217231	0.967044	0.906887	Znf346	5	-0.1683	0.490042	0.272731						HNRNPA2B1		SNRPD1
															Ruvbl1	6	-0.217861	0.354313	0.0636204	Add1	11	-0.168744	0.383345	0.171195						HNRNPA3		SNRPD2
															Cse1l	4	-0.217947	0.827143	0.626375	Psmd3	14	-0.169587	0.686401	0.50086						HNRNPAB		SNRPD3
															Pon2	6	-0.218192	0.62035	0.322872	Pabpc1	22	-0.171165	0.405192	0.193479						HNRNPD		TMSB4X
															Itgb1	11	-0.221601	0.535636	0.195019	Zc3h14	3	-0.17119	0.939546	0.890535						HNRNPDL		RPL7A
															Myo6	34	-0.222189	0.507416	0.17286	Adamts4	4	-0.174183	0.282534	0.103837						RANBP2		POLR2G
															Mrps9	3	-0.22244	0.559571	0.223283	Rfc5	5	-0.174296	0.276399	0.0984956						RPL7		ETF1
															Emd	5	-0.222535	0.388383	0.0865426	Ddx41	4	-0.174541	0.530671	0.313451						RPL7L1		CNBP
															Rpl5	22	-0.223468	0.425538	0.116505	Ywhah	2	-0.174969	0.410612	0.200042						RNASE13		RPS4X
															Snrpa1	6	-0.227114	0.947243	0.858517	Ddx46	15	-0.176223	0.247994	0.081246						RPS6		RPL23A
															Rpl12	11	-0.227116	0.425565	0.117189	Snrpc	8	-0.17838	0.410118	0.199509						MRPL3		RPS6
															Mcm6	17	-0.22791	0.532582	0.192684	Hsd17b4	22	-0.179078	0.534136	0.317692						DDX28		HIST1H4A
															Myo1b	11	-0.228779	0.415047	0.10642	Rtn4	6	-0.180001	0.562885	0.350057						DDX47		RAN
															Lamtor1	2	-0.229151	0.467188	0.141582	Eif3k	2	-0.180088	0.367285	0.158006						RNASEH2C		RPL23
															Dctn1	9	-0.230478	0.359818	0.0687829	Map4	35	-0.180167	0.932747	0.867634						TFB2M		RPS15
															Upf1	19	-0.230497	0.414894	0.104836	Eif4e	3	-0.183489	0.441621	0.224627						TEP1		RPS24
															Eif4e	4	-0.231129	0.725805	0.469275	Edc4	4	-0.184382	0.267056	0.0928228						NOC4L		RPS25
															Ank2	35	-0.234241	0.506681	0.168354	Srgap3	3	-0.187116	0.745524	0.584732						CPSF1		RPS26
															Tmpo(lap2a)	7	-0.234494	0.628946	0.339354	Ccar1	16	-0.188412	0.706328	0.526626						DDX1		RPS28
															Ankfy1	2	-0.23702	0.46839	0.143379	Actr2	5	-0.189054	0.201746	0.05719						DDX3X		FAU
															Septin 2	14	-0.237861	0.735165	0.482721	Myh10	12	-0.192392	0.355576	0.150081						DDX3Y		POLR2L
															Cyp51a1	7	-0.238964	0.649744	0.357523	Prmt1	6	-0.19287	0.561563	0.346377						DDX4		RPL30
															Aifm1	2	-0.240906	0.829782	0.640628	Snrpe	2	-0.193173	0.226846	0.0700004						NOP56		RPL39
															Cltc	51	-0.241283	0.559571	0.216778	Fam3c	2	-0.193346	0.510944	0.289703						RPS20		RPL31
															Rpl24	13	-0.241764	0.565457	0.242411	Nars	12	-0.194372	0.293242	0.110906						MPHOSPH10		RPL10A
															Dynll1	2	-0.242219	0.671255	0.391806	Tomm22	2	-0.194465	0.653317	0.455088						MRM1		RPL32
															Ddx39b	11	-0.242275	0.455862	0.134312	Arhgef2	2	-0.199228	0.897564	0.813195						DXO		RPL11
															Nop10	3	-0.242962	0.319838	0.0466899	Ahcyl1	17	-0.201119	0.332406	0.134705						DENR		RPL8
															Hsp90ab1	47	-0.242967	0.424559	0.114867	Drosha	2	-0.201576	0.867571	0.756344						RPL21		PPIA
															Rpl18	14	-0.243937	0.519977	0.180833	Rbm3	6	-0.201777	0.164599	0.0365775						RPS10		FKBP1A
															Hist1h1e	9	-0.244319	0.776218	0.566325	Mcm2	9	-0.20839	0.899513	0.816865						NAT10		RPL41
															Atic	2	-0.245076	0.96527	0.899503	Ctnnb1	3	-0.209352	0.258681	0.0884379						UTP18		RPS27A
															Pspc1	24	-0.245493	0.771438	0.559596	Copb2	3	-0.209504	0.276399	0.0987549						NOL12		UBA52
															Rpf2	4	-0.245855	0.425538	0.116687	Snrpg	2	-0.209878	0.740614	0.573396						DDX31		GRB2
															Fut8	5	-0.247149	0.438796	0.126126	Eif4a3	17	-0.212007	0.397582	0.183731						ABCF1		TRA2B
															Rad21	3	-0.24876	0.72631	0.470545	Prpf4	9	-0.215595	0.576925	0.367221						DNMT1		YWHAZ
															Hist1h1b	14	-0.249255	0.896364	0.753862	Sf3a2	2	-0.215756	0.885028	0.787677						SNRPA1		ERVK-9
															Psmd1	8	-0.249626	0.98078	0.942719	Strap	4	-0.216098	0.455492	0.239425						API5		SNRPN
															Sf3a2	6	-0.250237	0.519961	0.180455	Gar1	3	-0.217811	0.332406	0.135188						SHQ1		SUMO1
															Tm9sf3	3	-0.250623	0.858475	0.703109	Cltc	41	-0.218049	0.265447	0.0920745						AKAP1		DYNLL1
															Hist1h1a	6	-0.251933	0.505626	0.167226	Map7d1	12	-0.219764	0.225981	0.0688887						FTO		RPL38
															Hist2h2aa1	2	-0.252227	0.916157	0.793011	Ap1m1	3	-0.220817	0.460968	0.244011						PUF60		RPS21
															Slc27a1	18	-0.253315	0.837734	0.661414	Fermt2	8	-0.220863	0.26744	0.0933373						SAMHD1		EIF5A
															Pgk1	9	-0.253643	0.584185	0.272983	Stau1	18	-0.221962	0.253326	0.0842623						RBM45		RACK1
															Ndufs2	7	-0.254167	0.922304	0.801207	Psmd11	3	-0.222993	0.657499	0.461113						FAM98B		SUPT4H1
															Amt	2	-0.254252	0.559571	0.219934	Prpf8	52	-0.223425	0.440372	0.223009						FAM98A		UBE2I
															Tuba1b	2	-0.25547	0.436519	0.123923	Ddx3y	2	-0.226483	0.596089	0.388477						FAM98C		YBX1
															Sf3a1	3	-0.256828	0.754177	0.517702	Arf4	5	-0.227553	0.614951	0.409092						PCF11		UBE2L3
															Dnmt1	12	-0.257417	0.562104	0.236172	Prpf3	13	-0.228347	0.255908	0.0871253						EIF5		EEF1A1
															Slc25a12	3	-0.258844	0.767177	0.543939	Rnps1	7	-0.23269	0.275654	0.0975324						ZC3HC1		TUBA1B
															Kpnb1	9	-0.258939	0.422663	0.113569	Nfix	3	-0.234942	0.814897	0.679081						HNRNPC		TUBB4B
															Fasn	33	-0.259273	0.594394	0.286018	Chst2	9	-0.235093	0.402276	0.188672						HNRNPCL1		CSNK2A1
															Cad	12	-0.261222	0.737366	0.487175	Skiv2l2	3	-0.235517	0.99278	0.991574						RALY		NOP14
															Kif5b	10	-0.264821	0.361592	0.0716644	Safb	23	-0.236841	0.334779	0.136868						RALYL		RBM6
															Faf2	2	-0.265741	0.559571	0.218424	Gcn1	34	-0.239257	0.282422	0.103303						SEPSECS		EIF4G2
															Ppp1ca	4	-0.267093	0.46839	0.145545	Tmco1	6	-0.239335	0.940669	0.893891						NPM1		RPP38
															Add3	10	-0.267698	0.394964	0.0901423	Supt16h	9	-0.240283	0.433841	0.218466						NPM3		RPP30
															Flna	12	-0.269889	0.625701	0.3335	Cap1	6	-0.241402	0.358715	0.15202						NPM2		SRPK2
															Cyfip1	6	-0.272431	0.71685	0.445169	Nup214	2	-0.243484	0.773014	0.620978						NUPL2		CCT2
															Arf4	5	-0.272671	0.46839	0.144288	Ncoa5	9	-0.247269	0.184486	0.0463842						MRPS14		RAE1
															Pno1	4	-0.273117	0.413846	0.0989271	Cirbp	9	-0.249856	0.529127	0.310542						SF3A1		PRKDC
															Rdh11	6	-0.275398	0.531665	0.189967	Zcchc24	3	-0.250907	0.187436	0.0487281						EIF3A		MAP1A
															Ckap5	26	-0.276142	0.625691	0.332606	Copg1	3	-0.25212	0.507504	0.285923						FASTKD5		ADARB1
															Mthfd1	20	-0.278188	0.540157	0.200979	Rrbp1	79	-0.255851	0.193165	0.0521435						TDRD3		PRR3
															Rala	2	-0.278278	0.903657	0.766989	Ndc1	3	-0.256397	0.263019	0.0901084						SNRPB		IFI35
															Prpf19	21	-0.279454	0.578233	0.2638	Egfr	5	-0.257297	0.354802	0.149098						SNRPN		BASP1
															Myh10	27	-0.281197	0.288626	0.035643	Pfn1	2	-0.261371	0.672116	0.479363						YRDC		DCD
															Tmem43	4	-0.281612	0.559571	0.221852	Timm44	2	-0.267414	0.469845	0.251701						POLR2K		MRPS22
															Rpl21	11	-0.284452	0.697015	0.429505	Hnrnpll	20	-0.270658	0.19513	0.0537164						ERN2		MRPS25
															Ncbp3	2	-0.284461	0.829782	0.641562	Mtif3	5	-0.270682	0.216403	0.0638934						ERN1		MRPS10
															Kif2a	15	-0.284723	0.365734	0.0770922	Cenpv	10	-0.27185	0.743721	0.578909						RPL5		MRPS35
															Sfxn3	6	-0.287398	0.671255	0.39406	Top3b	6	-0.272455	0.230047	0.072907						RPS17		MRPS5
															Rab1b	2	-0.288102	0.876607	0.726807	Prkra	15	-0.273034	0.28847	0.108473						RPS17L		MRPS36
															Pelp1	3	-0.288192	0.809634	0.605646	Hacd3	3	-0.273177	0.877844	0.771759						DARS		MRPS11
															Cbs	5	-0.289279	0.998278	0.996153	Stat3	9	-0.275495	0.228969	0.0715308						IPO7		MRPS15
															Smc4	14	-0.28991	0.998278	0.993015	Ank2	34	-0.276685	0.413423	0.202884						IPO8		MRPS21
															Rfc3	4	-0.290766	0.717131	0.445853	Bud31	2	-0.277518	0.871944	0.76202						SMN1		MRPS34
															Lsm4	5	-0.290975	0.332531	0.0517352	Zmat3	5	-0.281062	0.175603	0.0429002						SMN2		MRPS6
															Rcc1	8	-0.291913	0.966836	0.903021	Eif3f	7	-0.28348	0.231439	0.0739497						GTPBP4		MRPS9
															Psmc4	12	-0.293343	0.565457	0.242385	Adrm1	2	-0.283839	0.433841	0.218282						MRPL13		HMGN5
															Eif3h	3	-0.295396	0.853797	0.693218	Dctn1	5	-0.283968	0.156899	0.0321843						MRPL46		SARNP
															Kpna1	2	-0.295871	0.559571	0.222208	Eif3h	4	-0.285928	0.36424	0.156177						LSM5		HTRA4
															Rbm39	12	-0.303637	0.272641	0.0293125	Ppp1cc	2	-0.288819	0.185563	0.0473201						EIF4G3		LACTB
															Septin 9	27	-0.303943	0.414894	0.103321	Ddx5	45	-0.290561	0.219203	0.0663541						EIF4G1		LSM11
															Rpl35	10	-0.305445	0.995273	0.972467	Ddx42	6	-0.291026	0.773014	0.6203						EIF4G2		RPL24
															Sptbn1	18	-0.305803	0.359818	0.0690009	Ap3b1	2	-0.292351	0.743721	0.578979						GTF2F1		TXNL4A
															Gtf3c1	13	-0.3116	0.668539	0.3853	Dgcr8	2	-0.294514	0.134403	0.0236577						RPS15A		RPL36A
															Atad1	8	-0.311761	0.319838	0.0476692	Gnl2	2	-0.298279	0.558143	0.341883						PIH1D2		SMAD3
															Arpc2	4	-0.313739	0.507081	0.170946	Aqr	4	-0.306416	0.115259	0.0168936						TTF2		ARF1
															Slirp	8	-0.314854	0.46839	0.147258	Znf638	11	-0.307221	0.138271	0.024621						PUS3		ERH
															Elavl1	19	-0.315073	0.395097	0.0907433	Ppp2r1a	4	-0.311923	0.183894	0.0461044						RBM7		RPL19
															Ilk	10	-0.315259	0.23699	0.0222021	Rbm27	2	-0.315072	0.441621	0.22506						RBM11		SRSF3
															Eif2b4	3	-0.316493	0.319838	0.0461258	Eif3l	10	-0.315473	0.191089	0.051411						TSEN2		CCZ1
															Canx	35	-0.319283	0.908251	0.779996	Acin1	13	-0.316542	0.216403	0.0641808						RBM42		RBM10
															Senp3	4	-0.320143	0.626761	0.33451	Eef1b	4	-0.318481	0.589331	0.378676						UTP3		RBM3
															Nudc	4	-0.320728	0.417494	0.108676	Spats2	7	-0.318725	0.283576	0.104624						HNRNPL		ATP2C1
															Paics	7	-0.323528	0.736848	0.484814	Septin 2	15	-0.319673	0.113076	0.0161136						HNRNPLL		CYCS
															Dnajb11	2	-0.323993	0.814543	0.613364	Eif3e	8	-0.320452	0.16077	0.0344956						PTBP1		TFAM
															Ephx1	10	-0.324017	0.363938	0.0754013	Septin 9	26	-0.322628	0.100241	0.0117006						PTBP2		MAT1A
															Ogt	2	-0.324654	0.608459	0.309322	Eif4h	3	-0.324792	0.417139	0.206519						PTBP3		HDLBP
															Prex1	10	-0.324786	0.908251	0.781908	Capza2	3	-0.333761	0.214738	0.0625554						SYMPK		PURA
															Rps8	19	-0.325225	0.60258	0.300473	Emd	4	-0.33486	0.780143	0.630671						POLR2F		CLTC
															Rpl18a	17	-0.325549	0.560159	0.234033	Gtf2e1	2	-0.340078	0.686401	0.499495						TSR2		FKBP3
															Uso1	2	-0.327241	0.46839	0.147141	Sltm	21	-0.341592	0.184581	0.0468888						KIAA0391		HNRNPU
															Pigk	2	-0.330337	0.565457	0.245561	Snrpf	2	-0.345277	0.129775	0.0223686						POLR2G		MDM2
															Nup133	3	-0.332405	0.361235	0.0709798	Smu1	3	-0.34537	0.316159	0.124527						WDR5		U2AF1
															Mrps16	3	-0.336	0.760265	0.530116	Thoc2	5	-0.34789	0.247474	0.0805524						SNRNP40		SPTBN1
															Ptn	10	-0.337648	0.507081	0.169471	Sf3b3	12	-0.351112	0.0892119	0.00895931						WDR83		TIAL1
															Aldh3a2	2	-0.338687	0.3469	0.0573654	Gapdh	22	-0.351209	0.113076	0.0159673						ZFC3H1		SET
															Ruvbl2	9	-0.339245	0.209449	0.019176	Fam98a	4	-0.353221	0.473071	0.254057						RPL15		SRSF2
															Ahsa1	5	-0.341202	0.584944	0.277531	Prpf19	17	-0.353239	0.0911515	0.00947872						SNRNP35		EXOSC10
															Ptges3	4	-0.342333	0.66196	0.377726	Ppp1r10	4	-0.35904	0.749571	0.590474						SNRNP70		OTUD4
															Fermt2	15	-0.342403	0.296082	0.0374316	Plat	10	-0.363168	0.12273	0.0198049						MRPL39		EWSR1
															Smc1b	3	-0.343328	0.735165	0.483153	Mtss1l	6	-0.377106	0.117417	0.0179806						TLR7		POU5F1
															Psmc5	17	-0.34425	0.540157	0.20137	Rfc1	5	-0.377677	0.131384	0.0227395						TLR8		TAGLN
															Nop2	8	-0.347617	0.559571	0.217675	Sf3b5	2	-0.379566	0.276399	0.0995798						TLR3		AKAP17A
															Rrs1	2	-0.347706	0.697015	0.428596	Snrpd1	4	-0.380218	0.152735	0.0303512						NAA38		KIF23
															Otub1	2	-0.348097	0.643813	0.353663	Fam76b	3	-0.386797	0.877844	0.771033						PRPF31		ALDH6A1
															Acsbg1	24	-0.348469	0.593776	0.285299	Dhx36	13	-0.388113	0.441621	0.227009						MRPL55		HIST1H1A
															Myh9	105	-0.351298	0.350913	0.0607684	Sf3b1	34	-0.400275	0.0819351	0.00769548						TRMT2A		RPL18A
															Eif3d	15	-0.351442	0.413719	0.0983648	Snw1	2	-0.401701	0.167454	0.0384046						TRMT2B		MAP2K1
															Capza2	6	-0.354387	0.608459	0.30622	Sf3a1	3	-0.402396	0.0680732	0.00505781						RPS3A		FKBP4
															Srp54	3	-0.356509	0.573409	0.257552	Xab2	3	-0.408776	0.750364	0.594305						BRCA1		PLOD1
															Ahcyl1	20	-0.363408	0.574778	0.259395	Ilk	9	-0.41927	0.113076	0.0158287						RIOK2		RPL6
															Lig3	2	-0.364339	0.623239	0.329091	Safb2	9	-0.421382	0.33169	0.133695						DHX16		SLC25A11
															Lman2	8	-0.365289	0.413846	0.0992762	Snrpd2	10	-0.430113	0.126182	0.0210304						DHX33		DST
															Septin 11	18	-0.369916	0.200584	0.0136256	Evpl	2	-0.433132	0.783616	0.634037						DHX35		MLLT1
															Csnk2a1	11	-0.372153	0.288774	0.0360711	Tdrd3	10	-0.435724	0.0925901	0.00969426						DHX32		KMT2A
															Rcn2	3	-0.374534	0.638779	0.348898	Ubxn4	4	-0.436294	0.0987426	0.0111336						DQX1		CENPC
															Hacd3	3	-0.375065	0.638779	0.349085	Glyr1	18	-0.437291	0.080164	0.00708001						DHX15		CEBPZ
															Psmd12	9	-0.376344	0.754177	0.518511	Ankfy1	7	-0.437764	0.162263	0.0355658						DHX8		ARID5A
															Prpf4b	6	-0.376689	0.566329	0.251016	Xpo1	6	-0.43793	0.15083	0.0290058						MRPS5		EIF4G1
															Tdrkh	4	-0.376816	0.319838	0.0462087	Aldh3a2	3	-0.439029	0.589331	0.378901						SAP18		SSBP1
															Dazap1	11	-0.377182	0.365639	0.0766583	Myef2	50	-0.447796	0.0987426	0.0110508						TUFM		YWHAH
															Smn1	2	-0.381175	0.584944	0.277732	Tmem214	2	-0.448184	0.696768	0.515132						EEFSEC		CSTF1
															Degs1	3	-0.382902	0.413846	0.0990269	Rpusd4	2	-0.462054	0.0877015	0.0084953						TDRD12		DNM1
															Zmpste24	5	-0.383163	0.608459	0.30969	Eloa	4	-0.479402	0.451693	0.23582						SKIV2L2		PTPN12
															Cbx3	2	-0.383891	0.60258	0.294312	Pak1ip1	5	-0.479799	0.138777	0.0250922						TRDMT1		SRSF11
															Capzb	4	-0.385619	0.608459	0.312094	Nup155	2	-0.491309	0.469845	0.25199						ZNF473		EEF1A2
															Pfn1	4	-0.396552	0.591091	0.28359	Elob	3	-0.492764	0.253636	0.0850871						FCF1		CALD1
															H2afz	2	-0.399239	0.760265	0.531849	Tpi1	3	-0.495921	0.820457	0.688389						URB1		COL14A1
															Ugp2	4	-0.400677	0.185416	0.0115185	Usp10	3	-0.506901	0.0928404	0.00982866						CARS		RNASEL
															Snrpc	6	-0.404154	0.272641	0.0296054	Zc3h11a	5	-0.510365	0.165398	0.0377357						CARS2		PTPN11
															Acadvl	7	-0.404339	0.507416	0.171692	Rbm39	12	-0.516168	0.0342218	0.00163309						CELF1		GFPT1
															Dgat1	2	-0.407716	0.856689	0.696782	Tnpo1	9	-0.526032	0.216403	0.0642803						CELF2		EXOSC9
															Itpr2	17	-0.408367	0.560159	0.233473	Igf2bp3	4	-0.528908	0.108744	0.0137832						CELF3		MEF2C
															Dnm2	14	-0.409785	0.349073	0.0599615	Hnrnpm	62	-0.530916	0.0343018	0.00173464						CELF4		GABPB1
															Cox6a1	2	-0.427198	0.967044	0.905267	Spats2l	7	-0.547718	0.156899	0.0321745						CELF5		FMR1
															Acsl3	18	-0.428272	0.507081	0.17085	Cep170	4	-0.562513	0.0489805	0.00311543						CELF6		PRDX1
															Fkbp5	3	-0.429368	0.421786	0.112763	Srbd1	23	-0.564114	0.0553025	0.00371015						XPO1		RPL18
															Vps35	3	-0.439858	0.737847	0.490676	Iars	10	-0.565833	0.0329414	0.00145655						DDX17		C1QBP
															Tmcc3	6	-0.455704	0.319838	0.0472793	Terf2	3	-0.57439	0.0343018	0.00171003						DDX46		CKAP4
															Myo18a	9	-0.456735	0.357526	0.0666667	Sf1	11	-0.577945	0.0716345	0.00566342						DDX5		ZFP36L1
															Rab5c	7	-0.46054	0.282134	0.0330217	Fxr2	12	-0.606075	0.0489805	0.00313977						DDX42		KHDRBS1
															Qki	25	-0.462979	0.342466	0.0551738	FAM120A	35	-0.625697	0.0343018	0.00172135						DDX43		DLX2
															Copg1	5	-0.465728	0.333838	0.0525991	Fmr1	20	-0.635262	0.0434976	0.00241653						DDX53		SOS1
															Ctsd	4	-0.468016	0.929591	0.820732	Rbm42	3	-0.638491	0.0488755	0.00302861						FIP1L1		SOS2
															Rpl36	3	-0.469409	0.185416	0.0117088	Eif3m	3	-0.651095	0.318791	0.126699						MRPL14		LRP1
															Cpt1a	6	-0.473855	0.354313	0.0634873	Septin 8	3	-0.656292	0.0908348	0.00929939						TXNL4A		SRSF1
															Ipo5	5	-0.476854	0.414894	0.105784	Snrpd3	8	-0.656908	0.0488755	0.00301061						TXNL4B		ACTN3
															Nes	11	-0.488287	0.209449	0.0185335	Kpna4	2	-0.670711	0.480154	0.260024						RBM39		SRSF4
															Scarb2	2	-0.488477	0.209449	0.0162474	Trove2	4	-0.672932	0.0725963	0.0060071						RBM23		DHX9
															Rab5a	2	-0.490626	0.769554	0.550684	Reep1	2	-0.673694	0.293517	0.111219						CPEB1		CRYZ
															Copb2	3	-0.494447	0.349073	0.0602021	Ctsd	2	-0.690203	0.253636	0.0848081						CPEB2		MFGE8
															Mtif3	7	-0.498764	0.239464	0.0227737	Plrg1	3	-0.691216	0.115259	0.0169933						CPEB3		DMTN
															Rack1	5	-0.501821	0.628946	0.336538	Parp12	4	-0.724447	0.021386	0.000746379						CPEB4		PPID
															Hnrnpll	21	-0.507953	0.13899	0.0067078	Ahsa1	2	-0.728003	0.712667	0.536531						INTS9		SSRP1
															Eif3g	5	-0.511731	0.848343	0.678863	Arf3	2	-0.739679	0.168195	0.0393663						CACTIN		NSUN2
															Idh1	12	-0.521715	0.540157	0.201601	Eprs	68	-0.771551	0.021386	0.000738368						MPHOSPH6		NCBP1
															Ddx41	2	-0.532177	0.530408	0.186614	Fxr1	32	-0.775628	0.0329414	0.00142429						RPL34		EP300
															Dync1i2	3	-0.532836	0.710436	0.439674	Snrpb	7	-0.806316	0.00965232	0.00024062						OBFC1		AHNAK
															Hspa4	5	-0.53573	0.721142	0.451417	Lars	14	-0.84993	0.0268799	0.00109128						RPS12		ZNF816
															Nvl	2	-0.536472	0.209449	0.0159906	Cs	17	-0.866784	0.0459972	0.00262092						PRPF8		USP17L24
															Mpc2	3	-0.538522	0.767863	0.545383	Sf3b4	2	-0.871749	0.117451	0.0180694						SECISBP2L		GALNT1
															Plat	16	-0.54661	0.264287	0.0271104	Eef1e1	6	-0.945158	0.0134794	0.00039363						SECISBP2		CPSF1
															Fam3c	2	-0.548604	0.354389	0.063906	Nono	40	-0.955728	0.0245597	0.000909618						RPUSD3		BST2
															Ctnna1	6	-0.551058	0.491488	0.156621	Sfpq	53	-0.956051	0.0116489	0.00032358						RPUSD4		TBL3
															Hmga2	2	-0.558177	0.969637	0.91844	Mars	22	-1.03212	0.00936084	0.000226687						DDX6		PNRC1
															Rab31	6	-0.566715	0.319838	0.0466394	Dars	22	-1.1888	0.0124916	0.000355885						RPL28		TRO
															Rbm10	3	-0.577428	0.209449	0.019042	Lsm6	2	-1.20489	0.0343018	0.00169589						ELAC1		GRSF1
															Mapre1	2	-0.585578	0.279368	0.0316083	Srek1	4	-1.23423	0.0073309	0.000133242						NOM1		SFSWAP
															Btf3l4	4	-0.595185	0.937518	0.838717	Hdlbp	58	-1.27358	0.00131827	1.69009e-05						TROVE2		CHD3
															Actr3	3	-0.610484	0.127003	0.00531808	Pcbp1	12	-1.27853	0.000896394	1.02153e-05						EEF1E1		SF3A3
															Rps12	4	-0.630407	0.108959	0.00363456	Aimp1	14	-1.28067	0.0262128	0.00102685						TARSL2		TP53BP1
															Gnb2	3	-0.6339	0.209449	0.0171376	Aimp2	7	-1.31186	0.00659855	0.000112796						TARS		IFRD2
															Nsf	3	-0.642064	0.274858	0.0307638	Rbm15b	9	-1.32131	0.00868742	0.000179997						TARS2		TRIM26
															Prss23	3	-0.645224	0.454743	0.133615	U2af1	15	-1.32229	0.00315295	4.84514e-05						IARS		AIMP1
															U2af1	14	-0.646744	0.0749672	0.00133015	Rars	23	-1.33687	0.0073309	0.000135757						RPL18A		ILF2
															Ednrb	2	-0.652189	0.559571	0.218494	Fam120c	32	-1.38507	0.00131827	1.63699e-05						ESF1		ILF3
															Dync1li1	2	-0.653992	0.435917	0.122205	Hnrnpk	34	-1.40826	0.000664656	5.07502e-06						EEF2		SLC10A2
															Dhrs1	4	-0.656181	0.584944	0.2775	Raly	19	-1.48205	0.002809	3.88748e-05						EFTUD2		ELAVL2
															Ckap2	2	-0.656461	0.565457	0.239933	Lsm4	7	-1.51618	0.00315295	4.94053e-05						DDX60		TRAP1
															Dock7	5	-0.67075	0.581652	0.266972	Kars	33	-1.70903	0.000664656	5.20742e-06						DDX60L		ANK3
															Lrpprc	50	-0.673618	0.0486894	0.000725676	Puf60	12	-1.75236	0.000707416	6.619e-06						MRPL2		PPP1R8
															Mtch1	3	-0.680855	0.623239	0.328433	Tarsl2	4	-1.75901	0.00579945	9.50053e-05						SLC4A1AP		NFX1
															Psmd13	9	-0.702725	0.361235	0.0704316	Slirp	9	-1.83901	0.000707416	7.054e-06						MAZ		CSTF3
															Ndc1	5	-0.709559	0.13899	0.00664892	U2af2	15	-1.84955	0.000707416	6.28361e-06						EIF2S3L		MLLT11
															U2af2	14	-0.715392	0.108959	0.00362702	Lrpprc	82	-1.85621	0.000816022	8.71819e-06						EIF2S3		TRIM32
															Eprs	70	-0.720211	0.0861616	0.00175462	Hnrnpc	25	-1.94871	0.000664656	4.39639e-06						AIMP1		MKRN3
															Ptdss1	2	-0.723083	0.829782	0.637478	Lsm2	3	-1.95541	0.0100287	0.00026429						APEX1		MRPL28
															Ctc1	3	-0.737012	0.371326	0.0787982	Pcbp2	15	-2.04352	0.000111297	3.96358e-07						EIF3J		PDIA2
															Gng12	3	-0.747634	0.209449	0.0171695	U2af1l4	3	-2.06901	0.002809	4.00142e-05						PABPC3		DAZ2
															Arf3	3	-0.750264	0.282134	0.0325622	Lsm8	4	-2.14348	0.00740626	0.000142428						PABPC1L		IK
															Arhgap12	2	-0.75374	0.565457	0.246039	Ptbp3	9	-2.22616	0.000174339	8.19533e-07						PABPC1L2A		EIF2B5
															Ywhah	2	-0.76107	0.417494	0.108483	Matr3	56	-2.25465	8.86116e-05	1.89341e-07						PABPC1L2B		TARDBP
															Dnajc9	3	-0.771997	0.559571	0.221233	Lsm3	3	-2.31876	0.000174339	8.84521e-07						PABPC4L		HNRNPA0
															Mars	19	-0.787864	0.106786	0.00332667	Tial1	8	-2.65287	0.000174339	9.93383e-07						PABPC5		AIMP2
															Rrm1	2	-0.812712	0.829782	0.642507	Ptbp1	27	-3.29913	0.000111297	3.75967e-07						PABPC4		DDX10
															Las1l	2	-0.816489	0.650208	0.35856	Ptbp2	24	-3.75985	8.86116e-05	1.66669e-07						PABPC1		SRSF9
															Actc1	3	-0.823856	0.421597	0.111907	Elavl1	23	-3.91448	1.37075e-05	9.7632e-09						MEX3A		SRSF5
															Pym1	3	-0.847231	0.0227484	0.000251586											MEX3B		SRSF6
															Lig1	2	-0.851576	0.10459	0.00274657											MEX3C		MAD2L1
															Ddrgk1	4	-0.854855	0.125002	0.00505688											MEX3D		TRIM28
															Arhgap5	2	-0.860439	0.363938	0.0730494											GEMIN7		G3BP1
															Setd3	2	-0.87219	0.356597	0.065549											MRPS23		NMI
															Lars	6	-0.895522	0.105306	0.00306427											PSIP1		PABPC4
															Aimp2	6	-0.898462	0.10459	0.0029692											SRP54		IFIT5
															Pex14	2	-0.904719	0.438517	0.125735											FARSB		EIF3I
															Lgals1	4	-0.910857	0.314955	0.0437214											SPEN		ITGB3BP
															Twf1	3	-0.912717	0.122655	0.00485578											RBM15B		TARBP1
															Sympk	3	-0.916675	0.0678812	0.00110807											RBM15		MRPL49
															Rars	22	-0.922588	0.022436	0.000222927											DNAAF2		DYNC1I2
															Nova1	3	-0.941283	0.0197191	0.000177694											SF3B1		ORC2
															Lypla2	2	-0.966646	0.421597	0.111866											RNASEH2B		MSLN
															Dars	25	-0.982027	0.0861616	0.00159165											FARSA		SNTB2
															Hsph1	3	-0.991066	0.0197191	0.000181936											NOB1		PPIG
															Cacybp	2	-0.998292	0.103701	0.00262085											EIF2A		TCOF1
															Ctnnd2	2	-1.01131	0.552301	0.206966											RNASEL		MKRN4P
															Adrm1	3	-1.01296	0.416708	0.107652											TRNT1		SF3B2
															Iars	12	-1.01841	0.0861616	0.00171043											EIF4ENIF1		GOLGA4
															Tfrc	2	-1.04835	0.10459	0.00291334											MECP2		PDAP1
															Matr3	53	-1.0812	0.00883242	5.64171e-05											RBM22		TOP3A
															Srek1	3	-1.08237	0.051817	0.000809067											CMTR1		SMAD4
															Tial1	5	-1.08463	0.0197191	0.000169407											RPL39		PRPF4B
															Thoc6	2	-1.08936	0.445625	0.130303											RPL39L		PIN1
															Eef1e1	7	-1.10073	0.0744313	0.00126782											RPSA		EIF4EBP1
															Fam76b	5	-1.10098	0.0898958	0.00193414											PARP4		EIF4EBP2
															Aimp1	13	-1.12794	0.0351661	0.000499164											CSTF1		CAMK2G
															Puf60	9	-1.14586	0.0227484	0.000258322											NCBP1		DCTN2
															Mecp2	2	-1.18827	0.502924	0.163477											SNRNP25		SNW1
															Ywhaq	4	-1.23265	0.374136	0.0804565											DNAJC21		TRA2A
															Ptbp3	5	-1.32234	0.00806109	4.57691e-05											CWC22		KRR1
															Kars	25	-1.32894	0.0119618	8.48955e-05											NFX1		TSTA3
															Ranbp1	2	-1.36261	0.782106	0.571176											MRPS31		ALKBH1
															Pcbp1	17	-1.44495	0.0025988	1.2911e-05											SMG5		THOC5
															Tia1	3	-1.48005	0.204207	0.014638											SART1		SPTAN1
															Rnf2	3	-1.67904	0.519977	0.181568											GEMIN2		GNL2
															Hnrnpk	37	-1.83001	0.00240162	6.81795e-06											NR0B1		AUH
															Hdlbp	56	-1.83266	0.00162029	2.72033e-06											DCP2		DDX39B
															Ptbp1	20	-1.88786	0.0025988	9.60991e-06											TAF15		EXOSC2
															Pcbp2	10	-2.0839	0.00162029	3.44987e-06											EWSR1		SNTB1
															Ptbp2	18	-2.39591	0.00162029	3.1659e-06											FUS		GTF2H2
															Cotl1	3	-3.17642	0.39167	0.0886749											EDC4		GTF2H3
															Znf768	2	-4.7306	0.363938	0.0751824											FBLL1		BYSL
															Inppl1	2	-5.20213	0.185416	0.0116101											FBL		C1D
																														MRPS27		CDK13
																														ALKBH1		CIRBP
																														ZCCHC17		BAAT
																														MRPL49		HNRNPD
																														RPL18		TOB2
																														RPS4X		PDE1C
																														RPS4Y1		BOP1
																														RPS4Y2		URB2
																														NOP14		DHX34
																														KRR1		MORC3
																														NCL		SAFB2
																														PRPF18		EIF3A
																														C1D		KIAA0141
																														ADAT3		UBAP2L
																														UTP20		TTLL12
																														SNIP1		WRN
																														GUF1		MRPL58
																														GCFC2		BTG3
																														UTP6		DYNC1H1
																														SRSF1		EIF2B1
																														SRSF3		EIF4A2
																														SRSF4		ELOA
																														SRSF5		CTTN
																														SRSF6		ENDOG
																														SRSF7		TRIM25
																														SRSF9		FASTK
																														USB1		FAM50A
																														NOL6		FRG1
																														PPIE		GK2
																														RRBP1		PIGH
																														SUZ12		CAPRIN1
																														TERT		GRB7
																														MSL3		SLBP
																														BICC1		RBM39
																														MRPS16		HLTF
																														RBMX2		DHX8
																														MRPL40		ELAVL3
																														ISG20		KIAA0100
																														ISG20L2		TRIP12
																														AEN		PUM1
																														REXO4		MDC1
																														TGS1		SMC1A
																														ZC3H4		RRP1B
																														ZC3H6		NCOA6
																														ZC3H8		PDCD11
																														RPL27A		BMS1
																														RPS19		USP10
																														SYF2		GANAB
																														TFB1M		RFTN1
																														DIMT1		LBR
																														TSEN34		MVP
																														DCAF13		GOLGB1
																														RPL9		NAA30
																														ARHGEF28		LASP1
																														AC004381.6		DRAP1
																														EIF4H		ZNF169
																														EIF4B		ZNF638
																														DDX54		KPNB1
																														MRPS36		NOLC1
																														PRPF40A		NWD1
																														PRPF40B		FASTKD3
																														EIF3L		PCLAF
																														NOL8		SART3
																														MTO1		SUZ12
																														PSMA1		EXOSC7
																														HTATSF1		EFTUD2
																														FTSJ1		LARS2
																														LAS1L		R3HDM1
																														POP1		DAZAP2
																														DZIP3		JOSD1
																														DGCR14		KARS
																														CDK9		RRS1
																														PAN3		EIF4H
																														RPL29		WDR43
																														DCPS		PAFAH1B3
																														MRP63		EBP
																														MRPL27		PRKD1
																														POLR2H		PLEC
																														ZNF239		PTGES3
																														XRN1		NONO
																														ZFR		PWP2
																														ZFR2		RNPS1
																														AGFG1		RBBP5
																														NSA2		TTF1
																														DDX10		PCBP1
																														TBL3		PCBP2
																														INTS2		SF3B3
																														YBX1		PUM3
																														YBX2		RBMY1F
																														YBX3		CNN3
																														SURF6		SAFB
																														THOC6		SF3B4
																														EIF3I		SF3A2
																														STRAP		RBMS2
																														RPL13		SF3A1
																														RRP12		SKIV2L
																														MRPS2		SURF2
																														ZCCHC8		TAF7
																														EFTUD1		TAF1C
																														RPL35		TAF1A
																														NSRP1		TSN
																														RPUSD2		TARBP2
																														BCDIN3D		SF1
																														THUMPD1		TRIP13
																														TRIM21		OASL
																														RANBP17		ZNHIT3
																														XPO7		TRIP4
																														TRMT12		TRIP6
																														ACIN1		MAPRE1
																														ZNF385A		ZRSR1
																														RPL23		ZRSR2
																														EED		ELAVL1
																														DNTTIP2		TOMM34
																														SBDS		SMAD2
																														DDX51		SMAD1
																														RBM18		TBCE
																														IPO11		EZH2
																														RPL22		ZYX
																														RPL22L1		SEPTIN 7
																														LCMT2		ENOX2
																														ZC3H11A		UAP1
																														FYTTD1		PDCD2
																														RNPS1		PKN2
																														RPS23		MRPL23
																														RNASEH2A		CDC37
																														FRG1B		SNRNP35
																														FRG1		RBBP7
																														NOL7		ZNF74
																														PRPF38A		TAF9
																														RBM41		ZNF239
																														RBM12		SRSF7
																														RBM12B		CPSF6
																														ESRP1		SMN1
																														ESRP2		FSCN1
																														HNRNPF		IFI16
																														HNRNPH1		CLPP
																														HNRNPH2		TST
																														HNRNPH3		HIST2H2AC
																														GRSF1		HADH
																														RNH1		PFKFB3
																														NOL9		TPD52L1
																														SRFBP1		IMMT
																														ARL6IP4		RTL8B
																														RPP40		FAM98C
																														ALKBH5		CPEB4
																														SMG7		KNOP1
																														PDE12		HNRNPUL2
																														CCRN4L		PDS5A
																														ANGEL1		MTHFSD
																														ANGEL2		RSPO1
																														CNOT6		TSR1
																														CNOT6L		TRIM71
																														PDCD11		ZXDC
																														RPL35A		IAH1
																														MRPL21		ZNF800
																														SMG6		ASTE1
																														PRPF19		CWF19L2
																														PRPF4		EIF2S3L
																														INTS4		CTU2
																														SRPK2		LRRFIP1
																														SUPV3L1		C18orf21
																														RBM17		TRMT5
																														NAF1		HNRNPA1L2
																														YARS		ACOT6
																														LRRFIP1		NSUN5P1
																														LRRFIP2		LSM12
																														EIF4E2		PUS10
																														EIF4E1B		RABL6
																														EIF4E3		TIMM50
																														EIF4E		LGALSL
																														BUD13		PARP14
																														CTU1		ZNF672
																														GTPBP1		GLYR1
																														GTPBP2		MTERF2
																														MTERFD2		TTC31
																														SRPR		CERKL
																														DDX50		LARP7
																														DDX21		ERFE
																														ZCRB1		ACSF3
																														RPL13A		PREPL
																														SRA1		TBC1D10B
																														PAPOLB		AASDH
																														PAPOLG		MRPL51
																														PAPOLA		KHDC1
																														RPL41		PABPC1L
																														ZNF768		PAN2
																														SCAF1		FAM98B
																														MRPS15		PDCD4
																														RNASET2		FNDC3B
																														EIF2B1		CRTC2
																														RPL36A		LRRC23
																														RPL36AL		NCBP3
																														DDX26B		PLEKHO1
																														INTS6		GLE1
																														RPS7		USP39
																														RRNAD1		SETMAR
																														MRPS21		TRMT12
																														SETD7		LACTB2
																														RBM8A		UNC50
																														MAGOH		FASTKD1
																														MAGOHB		TAF1B
																														RPL37A		INO80D
																														NOLC1		ZNF385B
																														IARS2		EAPP
																														LSM1		TDRD12
																														SUPT4H1		KHDC3L
																														EXO1		PAN3
																														DCP1B		RPL39P5
																														DCP1A		OXLD1
																														DNAJC17		FAM133B
																														RNGTT		ZNF326
																														DUSP11		C9orf116
																														CHERP		NOM1
																														WDR61		DALRD3
																														NANOS1		ZC3H12A
																														NANOS2		DNAJC21
																														NANOS3		RNASE13
																														EBNA1BP2		RNASE12
																														HELZ		RNASE10
																														RNMTL1		HERC4
																														PDCD4		ARL13A
																														PTRH2		SLC25A53
																														SART3		ZMAT1
																														ZC3H10		PPP6R3
																														LSM2		DCAF17
																														MRPS25		DDX60L
																														RPP21		ZC3H12B
																														ZMAT2		RPS26P11
																														IFIT1		EARS2
																														IFIT2		EEF1AKMT2
																														IFIT5		PABPC1L2A
																														IFIT1B		INTS6L
																														IFIT3		KHDC1L
																														NOVA1		PRRC2B
																														NOVA2		RRP12
																														SNRPD3		COA6
																														YARS2		AARS2
																														PTCD1		PCID2
																														TSR1		HABP4
																														MRPS6		WIPI1
																														TAF9		SAMD4B
																														RPL11		DNTTIP2
																														DDX23		HIST2H2BF
																														DDX59		EXOSC6
																														CCNT2		RBM48
																														CCNT1		HP1BP3
																														RPL8		VARS2
																														SARNP		PLEKHS1
																														IMP3		NOL9
																														SRRM4		CELF3
																														CNP		C9orf129
																														LIN28A		CC2D1B
																														LIN28B		RARS2
																														EIF3K		AXDND1
																														SF3B14		CHCHD2P9
																														EIF2S2		DDX59
																														RNMT		ZC3H13
																														MRPL42		C9orf114
																														THRAP3		GPATCH4
																														BCLAF1		IBA57
																														CXorf23		RBM20
																														PNO1		SWT1
																														RBM4		MRPL2
																														RBM4B		ATXN7L2
																														RBM14		UBAP2
																														R3HCC1		IFIT1B
																														R3HCC1L		L1TD1
																														KIAA0430		HENMT1
																														POP5		RBM26
																														MRPL51		INTS11
																														MARS		UTP14C
																														TYW1		ZCCHC11
																														MRPL16		RNASEH2B
																														DUS1L		ATPAF1
																														QRSL1		RC3H1
																														WARS2		THEMIS2
																														WRAP53		AHDC1
																														RSL24D1		MEX3C
																														SF3B4		RIF1
																														TDRD7		RPRD2
																														LARP1		EEF1A1P5
																														LARP1B		ANGEL2
																														RPL23A		PRPF38B
																														BAZ2A		TTC39B
																														BAZ2B		RNF20
																														EIF3E		VSIG8
																														CWC15		PPRC1
																														TOP1		YOD1
																														RPL31		RSBN1
																														SUPT6H		KHDRBS2
																														TST		ZCCHC6
																														HNRNPU		TDRD10
																														HNRNPUL1		MBNL2
																														HNRNPUL2		RNF219
																														RPS25		PAPD7
																														MRPL23		FBXO31
																														EIF1AD		NSUN5P2
																														SETX		WDR25
																														MARS2		EEF1DP3
																														CNOT3		LARP1B
																														MTIF2		ZNF385C
																														JAKMIP1		E4F1
																														FASTKD1		ARL6IP4
																																B3GNTL1
																																DIEXF
																																SPTY2D1
																																FRMPD2
																																INTS3
																																ERVK-6
																																CDCA2
																																CWF19L1
																																KIAA1429
																																HEATR6
																																ZNF324B
																																RPL7L1
																																TTC19
																																DMKN
																																PTRHD1
																																THOC7
																																DHRS7B
																																TWF2
																																SNRNP48
																																CAPRIN2
																																MRM1
																																TYW3
																																ZNF770
																																EIF5AL1
																																PDE12
																																CAPN13
																																TET2
																																NAA16
																																CXorf57
																																ZSCAN25
																																TIGD7
																																APOBEC3H
																																ZNF746
																																TMEM214
																																RPL13AP3
																																HIBCH
																																RWDD4
																																NEPRO
																																PRPF40B
																																ESRP1
																																JMJD6
																																PTRF
																																ZCCHC8
																																RPUSD3
																																DHX57
																																MRPL54
																																MRPL14
																																METTL2B
																																DUS1L
																																C8orf82
																																EDC4
																																FAHD2B
																																PRPF8
																																NBPF10
																																TNFAIP8L2
																																RPL22L1
																																RNASEK
																																ALKBH5
																																INTS5
																																RSBN1L
																																FAM199X
																																TRMT10B
																																MORN3
																																PSRC1
																																SHQ1
																																KCTD18
																																DARS2
																																INO80C
																																TTC33
																																PAPD4
																																ZC3H14
																																CCDC137
																																LARP1
																																TMED8
																																CPLX2
																																USP17L6P
																																WDR74
																																METAP1D
																																FIP1L1
																																CWC27
																																KIAA1324
																																DPP8
																																RAB11FIP1
																																RBMS3
																																DNAJC14
																																GIGYF2
																																KYAT3
																																CCNI2
																																MEX3B
																																LIN28B
																																AEBP2
																																BNC2
																																ZNF574
																																RBM44
																																TMEM182
																																FAM83H
																																RBPMS2
																																RBM43
																																PPP1R3F
																																SLC25A48
																																CFAP47
																																CFAP65
																																CEP128
																																C11orf57
																																C15orf52
																																SYDE1
																																PAXIP1
																																CYP4V2
																																XIRP1
																																CENPU
																																LARP4
																																RPS27L
																																INTS8
																																GAREM2
																																NOL8
																																ERN2
																																SUPT6H
																																SND1
																																MARK2
																																DDX46
																																TRMT10C
																																BZW1
																																DHX30
																																EIF3M
																																MEPCE
																																CENPQ
																																ZNF771
																																PARS2
																																RSRC2
																																CYFIP1
																																EPM2AIP1
																																DHX32
																																FASTKD5
																																CXXC5
																																CHST15
																																BHLHA15
																																PHF5A
																																APTX
																																TRMT1L
																																ZC3HAV1
																																MRPL21
																																EFL1
																																MAMDC2
																																SETX
																																TIPARP
																																ZNF571
																																PIWIL3
																																PIWIL4
																																MYH14
																																NUFIP2
																																SZRD1
																																DHX29
																																TRMT11
																																HDGFL2
																																RAI1
																																R3HCC1L
																																ABHD12B
																																HSD17B13
																																CPEB2
																																APBB1IP
																																WDR53
																																BCDIN3D
																																NET1
																																RBBP6
																																TSEN54
																																PTAR1
																																MTERF4
																																ADAT2
																																PNPLA5
																																HUWE1
																																YTHDF3
																																CTU1
																																KIAA0907
																																MRPL55
																																MRPL10
																																CENPV
																																SLFN11
																																RALYL
																																NPM2
																																DAZ4
																																SDCCAG8
																																PATL1
																																PEG10
																																TBC1D1
																																ATG4D
																																DDX53
																																TRPT1
																																MRPL52
																																SETD3
																																RBM23
																																NOP9
																																PABPN1
																																METTL3
																																YRDC
																																PRPF39
																																MTDH
																																ZNF598
																																KTN1
																																ZNF589
																																RIMS1
																																SMG6
																																CCDC84
																																N4BP2
																																ALYREF
																																ZC3H18
																																CAND1
																																RANBP3L
																																THOC6
																																METTL16
																																BPHL
																																ZC3HC1
																																TEN1
																																TMEM173
																																RPS19BP1
																																CDR2L
																																RALGPS2
																																LRRC28
																																MICU3
																																DHFR2
																																PROSER1
																																MEX3D
																																DDX42
																																SPATS2
																																DZIP3
																																PTRH1
																																DZIP1
																																PHF13
																																PPARGC1B
																																SLC13A5
																																MYLK4
																																DCP2
																																HIST2H2AB
																																RIOX2
																																RBM45
																																SPATA2L
																																APOBEC3F
																																PSTK
																																ERI1
																																FOXP4
																																MMAA
																																MCAT
																																CDKL3
																																WDR75
																																SLC44A2
																																CCDC60
																																CCDC117
																																ZC3H7A
																																PHF6
																																CHERP
																																ANKHD1
																																SUGP1
																																SUGP2
																																CCAR1
																																DHX40
																																NELFCD
																																MRPL41
																																GPALPP1
																																ETFBKMT
																																RBM12B
																																RPAP2
																																ZC3H3
																																DDX60
																																DHX37
																																RAVER1
																																FTSJ3
																																MB21D2
																																SRRM1
																																DIS3L2
																																SUPV3L1
																																GSPT2
																																LRRC56
																																TRMT44
																																SMYD4
																																BOD1L2
																																CMTR2
																																DND1
																																DZIP1L
																																TRMT2A
																																RPUSD2
																																DCP1B
																																XRN1
																																PELP1
																																TBC1D3
																																RNF113B
																																SELH
																																FAM9A
																																CENPL
																																C8orf59
																																FMR1NB
																																PUSL1
																																FAM177A1
																																CCAR2
																																REXO1
																																CMTR1
																																LRRC47
																																CFAP52
																																LINC01561
																																ARHGEF28
																																INTS1
																																PLD6
																																ZCCHC24
																																CLASRP
																																ASCC3
																																C17orf53
																																FNBP4
																																GTPBP8
																																ZCCHC7
																																NME8
																																GUF1
																																RIBC1
																																FSTL5
																																MINK1
																																CARNMT1
																																PAQR4
																																ARHGEF39
																																ZNF808
																																ZCCHC9
																																ZGPAT
																																SRBD1
																																NKAP
																																C12orf45
																																CISD2
																																RPP25L
																																MRPL50
																																ZC3H8
																																RNF10
																																EIF4E3
																																MSL3
																																CPSF7
																																LILRA3
																																C1orf52
																																GPR161
																																CELF5
																																PCDH20
																																CDKN2A
																																ZNF433
																																BEND7
																																RBMXL3
																																DDX51
																																PDCD7
																																NAT16
																																PTGR2
																																ENDOV
																																ENAH
																																RTL3
																																GBP7
																																GPATCH11
																																MRPL43
																																SYT2
																																C19orf47
																																TMEM102
																																ASCC1
																																EIF1AD
																																SREK1IP1
																																KRI1
																																BOLL
																																TTC29
																																PNLDC1
																																ZNF579
																																ZBTB38
																																TDRD5
																																PRPF38A
																																ZFP62
																																SIDT2
																																PCSK9
																																TXNDC5
																																INO80E
																																SERBP1
																																NOA1
																																FAM98A
																																HJURP
																																TSEN2
																																GLB1L3
																																DYNC2H1
																																FBXO15
																																ADAD2
																																SMG8
																																LSM14A
																																GIMAP8
																																C1orf131
																																PAPD5
																																TDRD9
																																RBM15B
																																TNRC6A
																																NSUN7
																																SETD9
																																CPEB3
																																CHDH
																																ABCF1
																																SRFBP1
																																NGDN
																																C1orf162
																																RTL9
																																PPHLN1
																																KMT2C
																																SYNE1
																																CMAS
																																NLGN4Y
																																HELB
																																LINS1
																																RDM1
																																KDM2B
																																EXD1
																																DDX55
																																GOT1L1
																																TDRD7
																																THOC2
																																WDR36
																																RP9
																																RNASE11
																																VANGL1
																																SNIP1
																																GADD45GIP1
																																GABPB2
																																MPLKIP
																																ZNF420
																																UHMK1
																																PUM2
																																LNX1
																																ZCRB1
																																ETNPPL
																																RBM46
																																TRMT10A
																																PIWIL2
																																ENOX1
																																MRPL30
																																PNPT1
																																RPS4Y2
																																MAGEE2
																																DTX3L
																																DDX54
																																RNASE8
																																BRIX1
																																RNASEH2C
																																EPS8L3
																																DQX1
																																NSUN6
																																UTP15
																																NUP210
																																GEMIN5
																																SMCR8
																																IPO4
																																PNISR
																																ZNF431
																																ZNF483
																																DIS3L
																																ZNF526
																																GSG2
																																AEN
																																ZNF473
																																SETD7
																																NOC3L
																																C2orf15
																																U2AF1L4
																																ZC3H15
																																PPIL4
																																GTF3C2
[truncated: 1,238 more rows]

## Sheet: unique
Treshold log2	Treshold q value	treshold p value			Treshold log2	Treshold q value																													PD 3' UTR (vs AR RNA)			PD 5' UTR (vs AR RNA)			Drosha IP
1	0.05	0.05	Group 1		1	0.1	4																												-			-			-
			Group 2		1	0.1	4																												-			-			-
			Group 3		3	0.001	4																												-			-			-			10		50		45
																	1	0.05					1	0.05
					Group 3					Group 1					Group 2					FALSE						FALSE						FALSE	FALSE
Name	IP pep count	IP log2	IP q-value	p-value	Drosha IP	PD2 3p pep count	PD2 3p log2	PD2 3p q-value	p-value	PD 3' UTR (vs AR RNA)	PD2 5p pep count	PD2 5plog2	PD2 5p q-value	p-value	PD 5' UTR (vs AR RNA)	PD3 3p pep count	PD3 3p log2	PD3 3p q-value	p-value	PD3 3p helper	PD 3' UTR (vs Hybrid)	PD3 5p pep count	PD3 5plog2	PD3 5p q-value	p-value	PD3 5p helper	PD 5' UTR (vs Hybrid)	PD3 3v5 pep count	PD3 3v5 log2	PD3 3v5 q-value	p-value	PD 3' vs 5'	PD 5' vs 3'		Group 1	83		Group 2	128		Group 3	165		A		B		C
Aars	#N/A	#N/A	#N/A	#N/A	0	3	-2.30374	0.022984	0.00637165	0	3	-0.116479	0.806608	0.72663	0	#N/A	#N/A	#N/A	#N/A	0	0	#N/A	#N/A	#N/A	#N/A	0	0	#N/A	#N/A	#N/A	#N/A	0	0		0	NULL		0	NULL		0	NULL		0		0		0
Abcd3	2	2.54297	0.00653661	0.0050954	0	3	-0.426854	0.309041	0.220477	0	3	1.08974	0.078666	0.0345293	0	30	-0.0959991	0.998278	0.990308	0	0	22	-0.012394	0.672116	0.480505	0	0	#N/A	#N/A	#N/A	#N/A	0	0		0	NULL		0	NULL		0	NULL		0		0		0
Abce1	2	2.0407	0.0040482	0.00278009	0	#N/A	#N/A	#N/A	#N/A	0	#N/A	#N/A	#N/A	#N/A	0	7	-0.0889275	0.995273	0.967956	0	0	4	0.158868	0.454349	0.238359	0	0	#N/A	#N/A	#N/A	#N/A	0	0		0	NULL		0	NULL		0	NULL		0		0		0
Abcf1	4	2.59488	0.00374209	0.00255184	0	18	1.72086	0.0347079	0.0122548	PD 3' UTR (vs AR RNA)	18	3.16522	0.0078141	0.00107765	PD 5' UTR (vs AR RNA)	13	0.0554398	0.929705	0.823399	0	0	11	0.0942972	0.648298	0.451131	0	0	12	0.0293646	0.831866	0.688106	0	0		1	NULL		1	Abcf1		0	NULL		0		1	Abcf1	0
Abcf2	#N/A	#N/A	#N/A	#N/A	0	#N/A	#N/A	#N/A	#N/A	0	#N/A	#N/A	#N/A	#N/A	0	5	-0.111765	0.970329	0.922123	0	0	#N/A	#N/A	#N/A	#N/A	0	0	#N/A	#N/A	#N/A	#N/A	0	0		0	NULL		0	NULL		0	NULL		0		0		0
Abhd12	#N/A	#N/A	#N/A	#N/A	0	#N/A	#N/A	#N/A	#N/A	0	#N/A	#N/A	#N/A	#N/A	0	12	0.134574	0.795884	0.588788	0	0	11	0.0814611	0.410118	0.198993	0	0	#N/A	#N/A	#N/A	#N/A	0	0		0	NULL		0	NULL		0	NULL		0		0		0
Ablim1	2	1.65548	0.0250133	0.0229941	0	#N/A	#N/A	#N/A	#N/A	0	#N/A	#N/A	#N/A	#N/A	0	#N/A	#N/A	#N/A	#N/A	0	0	#N/A	#N/A	#N/A	#N/A	0	0	#N/A	#N/A	#N/A	#N/A	0	0		0	NULL		0	NULL		0	NULL		0		0		0
Acaa1a	#N/A	#N/A	#N/A	#N/A	0	#N/A	#N/A	#N/A	#N/A	0	#N/A	#N/A	#N/A	#N/A	0	5	0.256736	0.821539	0.619879	0	0	3	0.103708	0.873954	0.765998	0	0	#N/A	#N/A	#N/A	#N/A	0	0		0	NULL		0	NULL		0	NULL		0		0		0
Acaa2	#N/A	#N/A	#N/A	#N/A	0	#N/A	#N/A	#N/A	#N/A	0	#N/A	#N/A	#N/A	#N/A	0	8	0.172807	0.621982	0.324455	0	0	2	-0.0663449	0.859082	0.737318	0	0	#N/A	#N/A	#N/A	#N/A	0	0		0	NULL		0	NULL		0	NULL		0		0		0
Acaca	#N/A	#N/A	#N/A	#N/A	0	64	-3.51785	0.00245599	8.61716e-05	0	64	-2.31003	0.0134816	0.00273951	0	#N/A	#N/A	#N/A	#N/A	0	0	#N/A	#N/A	#N/A	#N/A	0	0	#N/A	#N/A	#N/A	#N/A	0	0		0	NULL		0	NULL		0	NULL		0		0		0
Acad9	#N/A	#N/A	#N/A	#N/A	0	#N/A	#N/A	#N/A	#N/A	0	#N/A	#N/A	#N/A	#N/A	0	3	-0.072665	0.947243	0.858627	0	0	5	0.392088	0.122836	0.0201034	0	0	#N/A	#N/A	#N/A	#N/A	0	0		0	NULL		0	NULL		0	NULL		0		0		0
Acadl	#N/A	#N/A	#N/A	#N/A	0	#N/A	#N/A	#N/A	#N/A	0	#N/A	#N/A	#N/A	#N/A	0	6	-0.0127284	0.866803	0.715466	0	0	5	0.450244	0.12273	0.0194708	0	0	#N/A	#N/A	#N/A	#N/A	0	0		0	NULL		0	NULL		0	NULL		0		0		0
Acadm	#N/A	#N/A	#N/A	#N/A	0	#N/A	#N/A	#N/A	#N/A	0	#N/A	#N/A	#N/A	#N/A	0	2	0.743372	0.282134	0.0332393	0	0	4	0.205497	0.384639	0.17506	0	0	#N/A	#N/A	#N/A	#N/A	0	0		0	NULL		0	NULL		0	NULL		0		0		0
Acads	#N/A	#N/A	#N/A	#N/A	0	#N/A	#N/A	#N/A	#N/A	0	#N/A	#N/A	#N/A	#N/A	0	7	-0.0914614	0.903657	0.770421	0	0	5	0.27443	0.487982	0.269363	0	0	#N/A	#N/A	#N/A	#N/A	0	0		0	NULL		0	NULL		0	NULL		0		0		0
Acadsb	#N/A	#N/A	#N/A	#N/A	0	#N/A	#N/A	#N/A	#N/A	0	#N/A	#N/A	#N/A	#N/A	0	3	-0.195347	0.697319	0.430566	0	0	2	-0.1054	0.933905	0.871552	0	0	#N/A	#N/A	#N/A	#N/A	0	0		0	NULL		0	NULL		0	NULL		0		0		0
Acadvl	#N/A	#N/A	#N/A	#N/A	0	#N/A	#N/A	#N/A	#N/A	0	#N/A	#N/A	#N/A	#N/A	0	7	-0.404339	0.507416	0.171692	0	0	10	0.505483	0.115428	0.0174292	0	0	#N/A	#N/A	#N/A	#N/A	0	0		0	NULL		0	NULL		0	NULL		0		0		0
Acat1	#N/A	#N/A	#N/A	#N/A	0	3	0.711975	0.550523	0.45533	0	3	3.62564	0.0120761	0.00234113	0	#N/A	#N/A	#N/A	#N/A	0	0	#N/A	#N/A	#N/A	#N/A	0	0	#N/A	#N/A	#N/A	#N/A	0	0		0	NULL		0	NULL		0	NULL		0		0		0
Acat2	#N/A	#N/A	#N/A	#N/A	0	3	-1.46776	0.0967808	0.0511125	0	3	-2.56752	0.0173367	0.00410735	0	#N/A	#N/A	#N/A	#N/A	0	0	#N/A	#N/A	#N/A	#N/A	0	0	#N/A	#N/A	#N/A	#N/A	0	0		0	NULL		0	NULL		0	NULL		0		0		0
Acbd5	#N/A	#N/A	#N/A	#N/A	0	#N/A	#N/A	#N/A	#N/A	0	#N/A	#N/A	#N/A	#N/A	0	6	0.102559	0.878134	0.729661	0	0	2	-0.000754792	0.70519	0.523487	0	0	#N/A	#N/A	#N/A	#N/A	0	0		0	NULL		0	NULL		0	NULL		0		0		0
Acin1	15	4.70287	7.24084e-09	8.20047e-10	Drosha IP	#N/A	#N/A	#N/A	#N/A	0	#N/A	#N/A	#N/A	#N/A	0	15	0.215262	0.385807	0.0851568	0	0	13	-0.316542	0.216403	0.0641808	0	0	#N/A	#N/A	#N/A	#N/A	0	0		0	NULL		0	NULL		1	Acin1		0		0		0
Acly	#N/A	#N/A	#N/A	#N/A	0	7	-1.43643	0.0477547	0.0189402	0	7	0.440004	0.778379	0.692599	0	#N/A	#N/A	#N/A	#N/A	0	0	#N/A	#N/A	#N/A	#N/A	0	0	#N/A	#N/A	#N/A	#N/A	0	0		0	NULL		0	NULL		0	NULL		0		0		0
Aco2	2	2.24564	0.00645583	0.0050091	0	6	-1.48115	0.0307623	0.00971575	0	6	-0.757679	0.46397	0.343727	0	17	0.220365	0.414894	0.105547	0	0	17	0.346265	0.0964839	0.0106517	0	0	#N/A	#N/A	#N/A	#N/A	0	0		0	NULL		0	NULL		0	NULL		0		0		0
Acox1	#N/A	#N/A	#N/A	#N/A	0	#N/A	#N/A	#N/A	#N/A	0	#N/A	#N/A	#N/A	#N/A	0	17	0.263549	0.414894	0.10366	0	0	17	-0.126435	0.474394	0.255331	0	0	#N/A	#N/A	#N/A	#N/A	0	0		0	NULL		0	NULL		0	NULL		0		0		0
Acsbg1	4	3.39479	0.000414804	0.000160424	Drosha IP	#N/A	#N/A	#N/A	#N/A	0	#N/A	#N/A	#N/A	#N/A	0	24	-0.348469	0.593776	0.285299	0	0	16	0.0229772	0.616173	0.411413	0	0	#N/A	#N/A	#N/A	#N/A	0	0		0	NULL		0	NULL		1	Acsbg1		0		0		0
Acsl3	#N/A	#N/A	#N/A	#N/A	0	#N/A	#N/A	#N/A	#N/A	0	#N/A	#N/A	#N/A	#N/A	0	18	-0.428272	0.507081	0.17085	0	0	10	-0.0500766	0.84891	0.726594	0	0	#N/A	#N/A	#N/A	#N/A	0	0		0	NULL		0	NULL		0	NULL		0		0		0
Actb	35	2.36192	0.00399368	0.00273303	0	#N/A	#N/A	#N/A	#N/A	0	#N/A	#N/A	#N/A	#N/A	0	33	-0.195543	0.506681	0.168637	0	0	33	0.138389	0.431261	0.215631	0	0	#N/A	#N/A	#N/A	#N/A	0	0		0	NULL		0	NULL		0	NULL		0		0		0
Actc1	3	2.48708	0.00156677	0.000845658	0	4	-1.13419	0.154893	0.0945839	0	4	1.2479	0.359314	0.242005	0	3	-0.823856	0.421597	0.111907	0	0	#N/A	#N/A	#N/A	#N/A	0	0	#N/A	#N/A	#N/A	#N/A	0	0		0	NULL		0	NULL		0	NULL		0		0		0
Actg1	#N/A	#N/A	#N/A	#N/A	0	26	-2.1198	0.041816	0.0159275	0	26	-0.831944	0.536746	0.423816	0	#N/A	#N/A	#N/A	#N/A	0	0	#N/A	#N/A	#N/A	#N/A	0	0	#N/A	#N/A	#N/A	#N/A	0	0		0	NULL		0	NULL		0	NULL		0		0		0
Actn1	#N/A	#N/A	#N/A	#N/A	0	2	-7.10168	0.00618583	0.000755464	0	2	-4.75709	0.0259838	0.00757207	0	#N/A	#N/A	#N/A	#N/A	0	0	#N/A	#N/A	#N/A	#N/A	0	0	#N/A	#N/A	#N/A	#N/A	0	0		0	NULL		0	NULL		0	NULL		0		0		0
Actn4	36	1.48242	0.0323972	0.0300943	0	#N/A	#N/A	#N/A	#N/A	0	#N/A	#N/A	#N/A	#N/A	0	13	-0.183251	0.599875	0.291635	0	0	8	-0.0460808	0.597626	0.39033	0	0	#N/A	#N/A	#N/A	#N/A	0	0		0	NULL		0	NULL		0	NULL		0		0		0
Actr1a	2	2.24557	0.00260432	0.00162221	0	#N/A	#N/A	#N/A	#N/A	0	#N/A	#N/A	#N/A	#N/A	0	3	-0.191002	0.363938	0.0744125	0	0	#N/A	#N/A	#N/A	#N/A	0	0	#N/A	#N/A	#N/A	#N/A	0	0		0	NULL		0	NULL		0	NULL		0		0		0
Actr1b	#N/A	#N/A	#N/A	#N/A	0	3	-0.900694	0.220371	0.145226	0	3	1.76249	0.359033	0.240947	0	#N/A	#N/A	#N/A	#N/A	0	0	#N/A	#N/A	#N/A	#N/A	0	0	#N/A	#N/A	#N/A	#N/A	0	0		0	NULL		0	NULL		0	NULL		0		0		0
Actr2	9	2.91269	0.00253688	0.00156463	0	2	0.176065	0.730607	0.664349	0	2	-0.318483	0.955221	0.930965	0	5	0.0828692	0.9735	0.927212	0	0	5	-0.189054	0.201746	0.05719	0	0	#N/A	#N/A	#N/A	#N/A	0	0		0	NULL		0	NULL		0	NULL		0		0		0
Actr3	5	2.69551	0.000496422	0.000198569	0	4	-2.29059	0.326605	0.238931	0	4	0.270412	0.396269	0.277916	0	3	-0.610484	0.127003	0.00531808	0	0	4	-0.048312	0.529127	0.310211	0	0	#N/A	#N/A	#N/A	#N/A	0	0		0	NULL		0	NULL		0	NULL		0		0		0
Adamts4	#N/A	#N/A	#N/A	#N/A	0	#N/A	#N/A	#N/A	#N/A	0	#N/A	#N/A	#N/A	#N/A	0	4	0.118413	0.661261	0.37567	0	0	4	-0.174183	0.282534	0.103837	0	0	#N/A	#N/A	#N/A	#N/A	0	0		0	NULL		0	NULL		0	NULL		0		0		0
Adar	#N/A	#N/A	#N/A	#N/A	0	4	-0.858696	0.611191	0.521766	0	4	1.72489	0.512937	0.392611	0	#N/A	#N/A	#N/A	#N/A	0	0	#N/A	#N/A	#N/A	#N/A	0	0	#N/A	#N/A	#N/A	#N/A	0	0		0	NULL		0	NULL		0	NULL		0		0		0
Adarb1	#N/A	#N/A	#N/A	#N/A	0	#N/A	#N/A	#N/A	#N/A	0	#N/A	#N/A	#N/A	#N/A	0	#N/A	#N/A	#N/A	#N/A	0	0	5	0.0891497	0.686401	0.497957	0	0	#N/A	#N/A	#N/A	#N/A	0	0		0	NULL		0	NULL		0	NULL		0		0		0
Add1	5	2.57745	0.001498	0.000797731	0	#N/A	#N/A	#N/A	#N/A	0	#N/A	#N/A	#N/A	#N/A	0	12	-0.175832	0.662016	0.378228	0	0	11	-0.168744	0.383345	0.171195	0	0	#N/A	#N/A	#N/A	#N/A	0	0		0	NULL		0	NULL		0	NULL		0		0		0
Add3	#N/A	#N/A	#N/A	#N/A	0	#N/A	#N/A	#N/A	#N/A	0	#N/A	#N/A	#N/A	#N/A	0	10	-0.267698	0.394964	0.0901423	0	0	13	-0.168141	0.40675	0.194932	0	0	#N/A	#N/A	#N/A	#N/A	0	0		0	NULL		0	NULL		0	NULL		0		0		0
Adgrg1	#N/A	#N/A	#N/A	#N/A	0	#N/A	#N/A	#N/A	#N/A	0	#N/A	#N/A	#N/A	#N/A	0	2	0.734228	0.288626	0.0352548	0	0	4	0.435806	0.103828	0.0124979	0	0	#N/A	#N/A	#N/A	#N/A	0	0		0	NULL		0	NULL		0	NULL		0		0		0
Adnp	#N/A	#N/A	#N/A	#N/A	0	#N/A	#N/A	#N/A	#N/A	0	#N/A	#N/A	#N/A	#N/A	0	2	0.379473	0.903657	0.772418	0	0	#N/A	#N/A	#N/A	#N/A	0	0	#N/A	#N/A	#N/A	#N/A	0	0		0	NULL		0	NULL		0	NULL		0		0		0
Adrm1	#N/A	#N/A	#N/A	#N/A	0	#N/A	#N/A	#N/A	#N/A	0	#N/A	#N/A	#N/A	#N/A	0	3	-1.01296	0.416708	0.107652	0	0	2	-0.283839	0.433841	0.218282	0	0	#N/A	#N/A	#N/A	#N/A	0	0		0	NULL		0	NULL		0	NULL		0		0		0
Afdn	21	1.82567	0.0116812	0.0100205	0	#N/A	#N/A	#N/A	#N/A	0	#N/A	#N/A	#N/A	#N/A	0	#N/A	#N/A	#N/A	#N/A	0	0	#N/A	#N/A	#N/A	#N/A	0	0	#N/A	#N/A	#N/A	#N/A	0	0		0	NULL		0	NULL		0	NULL		0		0		0
Afg3l1	#N/A	#N/A	#N/A	#N/A	0	#N/A	#N/A	#N/A	#N/A	0	#N/A	#N/A	#N/A	#N/A	0	#N/A	#N/A	#N/A	#N/A	0	0	3	0.409735	0.138777	0.0251063	0	0	#N/A	#N/A	#N/A	#N/A	0	0		0	NULL		0	NULL		0	NULL		0		0		0
Afg3l2	#N/A	#N/A	#N/A	#N/A	0	#N/A	#N/A	#N/A	#N/A	0	#N/A	#N/A	#N/A	#N/A	0	4	1.00098	0.397875	0.0921627	0	0	#N/A	#N/A	#N/A	#N/A	0	0	#N/A	#N/A	#N/A	#N/A	0	0		0	NULL		0	NULL		0	NULL		0		0		0
Agap1	2	2.58938	0.003164	0.00210425	0	#N/A	#N/A	#N/A	#N/A	0	#N/A	#N/A	#N/A	#N/A	0	4	-0.0982862	0.639617	0.35045	0	0	2	0.401848	0.440372	0.22273	0	0	#N/A	#N/A	#N/A	#N/A	0	0		0	NULL		0	NULL		0	NULL		0		0		0
Agpat3	#N/A	#N/A	#N/A	#N/A	0	#N/A	#N/A	#N/A	#N/A	0	#N/A	#N/A	#N/A	#N/A	0	8	0.0363641	0.969637	0.919687	0	0	7	0.210937	0.382671	0.168076	0	0	#N/A	#N/A	#N/A	#N/A	0	0		0	NULL		0	NULL		0	NULL		0		0		0
Agpat5	#N/A	#N/A	#N/A	#N/A	0	#N/A	#N/A	#N/A	#N/A	0	#N/A	#N/A	#N/A	#N/A	0	5	0.0391539	0.951412	0.866783	0	0	3	0.219484	0.19513	0.0535662	0	0	#N/A	#N/A	#N/A	#N/A	0	0		0	NULL		0	NULL		0	NULL		0		0		0
Agrn	#N/A	#N/A	#N/A	#N/A	0	#N/A	#N/A	#N/A	#N/A	0	#N/A	#N/A	#N/A	#N/A	0	#N/A	#N/A	#N/A	#N/A	0	0	7	0.468295	0.0819351	0.00755964	0	0	#N/A	#N/A	#N/A	#N/A	0	0		0	NULL		0	NULL		0	NULL		0		0		0
Ahcyl1	2	2.63088	0.00171439	0.000943593	0	#N/A	#N/A	#N/A	#N/A	0	#N/A	#N/A	#N/A	#N/A	0	20	-0.363408	0.574778	0.259395	0	0	17	-0.201119	0.332406	0.134705	0	0	#N/A	#N/A	#N/A	#N/A	0	0		0	NULL		0	NULL		0	NULL		0		0		0
Ahsa1	#N/A	#N/A	#N/A	#N/A	0	#N/A	#N/A	#N/A	#N/A	0	#N/A	#N/A	#N/A	#N/A	0	5	-0.341202	0.584944	0.277531	0	0	2	-0.728003	0.712667	0.536531	0	0	#N/A	#N/A	#N/A	#N/A	0	0		0	NULL		0	NULL		0	NULL		0		0		0
Aif1l	3	2.2831	0.00707027	0.00557103	0	#N/A	#N/A	#N/A	#N/A	0	#N/A	#N/A	#N/A	#N/A	0	#N/A	#N/A	#N/A	#N/A	0	0	#N/A	#N/A	#N/A	#N/A	0	0	#N/A	#N/A	#N/A	#N/A	0	0		0	NULL		0	NULL		0	NULL		0		0		0
Aifm1	#N/A	#N/A	#N/A	#N/A	0	#N/A	#N/A	#N/A	#N/A	0	#N/A	#N/A	#N/A	#N/A	0	2	-0.240906	0.829782	0.640628	0	0	2	0.394968	0.255374	0.0860341	0	0	#N/A	#N/A	#N/A	#N/A	0	0		0	NULL		0	NULL		0	NULL		0		0		0
Aimp1	#N/A	#N/A	#N/A	#N/A	0	4	0.395835	0.359834	0.270202	0	4	-0.890666	0.230665	0.135376	0	13	-1.12794	0.0351661	0.000499164	0	0	14	-1.28067	0.0262128	0.00102685	0	0	#N/A	#N/A	#N/A	#N/A	0	0		0	NULL		0	NULL		0	NULL		0		0		0
Aimp2	#N/A	#N/A	#N/A	#N/A	0	#N/A	#N/A	#N/A	#N/A	0	#N/A	#N/A	#N/A	#N/A	0	6	-0.898462	0.10459	0.0029692	0	0	7	-1.31186	0.00659855	0.000112796	0	0	#N/A	#N/A	#N/A	#N/A	0	0		0	NULL		0	NULL		0	NULL		0		0		0
Akap2	15	1.90275	0.0136468	0.011958	0	#N/A	#N/A	#N/A	#N/A	0	#N/A	#N/A	#N/A	#N/A	0	#N/A	#N/A	#N/A	#N/A	0	0	#N/A	#N/A	#N/A	#N/A	0	0	#N/A	#N/A	#N/A	#N/A	0	0		0	NULL		0	NULL		0	NULL		0		0		0
Akap9	#N/A	#N/A	#N/A	#N/A	0	#N/A	#N/A	#N/A	#N/A	0	#N/A	#N/A	#N/A	#N/A	0	#N/A	#N/A	#N/A	#N/A	0	0	2	0.538438	0.693633	0.511826	0	0	#N/A	#N/A	#N/A	#N/A	0	0		0	NULL		0	NULL		0	NULL		0		0		0
Aldh18a1	#N/A	#N/A	#N/A	#N/A	0	#N/A	#N/A	#N/A	#N/A	0	#N/A	#N/A	#N/A	#N/A	0	6	0.503602	0.352007	0.0617074	0	0	7	0.382629	0.10435	0.0127094	0	0	#N/A	#N/A	#N/A	#N/A	0	0		0	NULL		0	NULL		0	NULL		0		0		0
Aldh2	#N/A	#N/A	#N/A	#N/A	0	#N/A	#N/A	#N/A	#N/A	0	#N/A	#N/A	#N/A	#N/A	0	#N/A	#N/A	#N/A	#N/A	0	0	4	0.507947	0.165398	0.0373927	0	0	#N/A	#N/A	#N/A	#N/A	0	0		0	NULL		0	NULL		0	NULL		0		0		0
Aldh3a2	#N/A	#N/A	#N/A	#N/A	0	#N/A	#N/A	#N/A	#N/A	0	#N/A	#N/A	#N/A	#N/A	0	2	-0.338687	0.3469	0.0573654	0	0	3	-0.439029	0.589331	0.378901	0	0	#N/A	#N/A	#N/A	#N/A	0	0		0	NULL		0	NULL		0	NULL		0		0		0
Aldoa	#N/A	#N/A	#N/A	#N/A	0	10	-1.80527	0.036875	0.0131983	0	10	-1.58554	0.206423	0.117813	0	#N/A	#N/A	#N/A	#N/A	0	0	#N/A	#N/A	#N/A	#N/A	0	0	#N/A	#N/A	#N/A	#N/A	0	0		0	NULL		0	NULL		0	NULL		0		0		0
Aldoc	#N/A	#N/A	#N/A	#N/A	0	6	-1.93365	0.0871242	0.0438255	0	6	-1.77388	0.330505	0.216207	0	#N/A	#N/A	#N/A	#N/A	0	0	#N/A	#N/A	#N/A	#N/A	0	0	#N/A	#N/A	#N/A	#N/A	0	0		0	NULL		0	NULL		0	NULL		0		0		0
Alg2	#N/A	#N/A	#N/A	#N/A	0	#N/A	#N/A	#N/A	#N/A	0	#N/A	#N/A	#N/A	#N/A	0	2	0.284291	0.635419	0.344542	0	0	#N/A	#N/A	#N/A	#N/A	0	0	#N/A	#N/A	#N/A	#N/A	0	0		0	NULL		0	NULL		0	NULL		0		0		0
Alyref	8	3.19206	4.21813e-05	1.07459e-05	Drosha IP	10	0.933392	0.0967808	0.0512789	0	10	1.64448	0.0653388	0.0261513	PD 5' UTR (vs AR RNA)	12	0.732	0.13899	0.00621814	0	0	10	-0.0061712	0.557809	0.339779	0	0	15	0.471003	0.145109	0.0207596	0	0		0	NULL		1	Alyref		1	Alyref		0		0		0
Amer2	2	2.43366	0.00131174	0.000670096	0	#N/A	#N/A	#N/A	#N/A	0	#N/A	#N/A	#N/A	#N/A	0	#N/A	#N/A	#N/A	#N/A	0	0	5	-0.110567	0.462013	0.245156	0	0	#N/A	#N/A	#N/A	#N/A	0	0		0	NULL		0	NULL		0	NULL		0		0		0
Amot	20	1.798	0.0115097	0.00985951	0	#N/A	#N/A	#N/A	#N/A	0	#N/A	#N/A	#N/A	#N/A	0	#N/A	#N/A	#N/A	#N/A	0	0	#N/A	#N/A	#N/A	#N/A	0	0	#N/A	#N/A	#N/A	#N/A	0	0		0	NULL		0	NULL		0	NULL		0		0		0
Amotl1	16	1.96715	0.00765494	0.00608706	0	#N/A	#N/A	#N/A	#N/A	0	#N/A	#N/A	#N/A	#N/A	0	#N/A	#N/A	#N/A	#N/A	0	0	#N/A	#N/A	#N/A	#N/A	0	0	#N/A	#N/A	#N/A	#N/A	0	0		0	NULL		0	NULL		0	NULL		0		0		0
Ampd3	#N/A	#N/A	#N/A	#N/A	0	#N/A	#N/A	#N/A	#N/A	0	#N/A	#N/A	#N/A	#N/A	0	#N/A	#N/A	#N/A	#N/A	0	0	5	0.728668	0.250615	0.0828242	0	0	#N/A	#N/A	#N/A	#N/A	0	0		0	NULL		0	NULL		0	NULL		0		0		0
Amt	#N/A	#N/A	#N/A	#N/A	0	#N/A	#N/A	#N/A	#N/A	0	#N/A	#N/A	#N/A	#N/A	0	2	-0.254252	0.559571	0.219934	0	0	#N/A	#N/A	#N/A	#N/A	0	0	#N/A	#N/A	#N/A	#N/A	0	0		0	NULL		0	NULL		0	NULL		0		0		0
Ank2	#N/A	#N/A	#N/A	#N/A	0	5	0.767713	0.863152	0.822864	0	5	2.27041	0.109417	0.053422	0	35	-0.234241	0.506681	0.168354	0	0	34	-0.276685	0.413423	0.202884	0	0	#N/A	#N/A	#N/A	#N/A	0	0		0	NULL		0	NULL		0	NULL		0		0		0
Ank3	6	2.61383	0.00157627	0.000854602	0	#N/A	#N/A	#N/A	#N/A	0	#N/A	#N/A	#N/A	#N/A	0	#N/A	#N/A	#N/A	#N/A	0	0	#N/A	#N/A	#N/A	#N/A	0	0	#N/A	#N/A	#N/A	#N/A	0	0		0	NULL		0	NULL		0	NULL		0		0		0
Ankfy1	#N/A	#N/A	#N/A	#N/A	0	#N/A	#N/A	#N/A	#N/A	0	#N/A	#N/A	#N/A	#N/A	0	2	-0.23702	0.46839	0.143379	0	0	7	-0.437764	0.162263	0.0355658	0	0	#N/A	#N/A	#N/A	#N/A	0	0		0	NULL		0	NULL		0	NULL		0		0		0
Ankrd17	#N/A	#N/A	#N/A	#N/A	0	#N/A	#N/A	#N/A	#N/A	0	#N/A	#N/A	#N/A	#N/A	0	5	0.347726	0.721992	0.455024	0	0	4	0.234522	0.28847	0.108634	0	0	#N/A	#N/A	#N/A	#N/A	0	0		0	NULL		0	NULL		0	NULL		0		0		0
Anp32b	#N/A	#N/A	#N/A	#N/A	0	#N/A	#N/A	#N/A	#N/A	0	#N/A	#N/A	#N/A	#N/A	0	7	0.153149	0.998278	0.995127	0	0	6	0.0575637	0.595201	0.385778	0	0	#N/A	#N/A	#N/A	#N/A	0	0		0	NULL		0	NULL		0	NULL		0		0		0
Anp32e	#N/A	#N/A	#N/A	#N/A	0	#N/A	#N/A	#N/A	#N/A	0	#N/A	#N/A	#N/A	#N/A	0	4	0.31161	0.628946	0.338263	0	0	3	0.00808655	0.686401	0.502533	0	0	#N/A	#N/A	#N/A	#N/A	0	0		0	NULL		0	NULL		0	NULL		0		0		0
Anxa2	#N/A	#N/A	#N/A	#N/A	0	2	-3.79514	0.0710859	0.0336949	0	2	-2.61684	0.162524	0.087256	0	#N/A	#N/A	#N/A	#N/A	0	0	2	0.084648	0.413423	0.202453	0	0	#N/A	#N/A	#N/A	#N/A	0	0		0	NULL		0	NULL		0	NULL		0		0		0
Ap1b1	#N/A	#N/A	#N/A	#N/A	0	#N/A	#N/A	#N/A	#N/A	0	#N/A	#N/A	#N/A	#N/A	0	3	0.221826	0.987782	0.956936	0	0	#N/A	#N/A	#N/A	#N/A	0	0	#N/A	#N/A	#N/A	#N/A	0	0		0	NULL		0	NULL		0	NULL		0		0		0
Ap1m1	#N/A	#N/A	#N/A	#N/A	0	#N/A	#N/A	#N/A	#N/A	0	#N/A	#N/A	#N/A	#N/A	0	5	-0.0364183	0.836658	0.655387	0	0	3	-0.220817	0.460968	0.244011	0	0	#N/A	#N/A	#N/A	#N/A	0	0		0	NULL		0	NULL		0	NULL		0		0		0
Ap2a1	#N/A	#N/A	#N/A	#N/A	0	#N/A	#N/A	#N/A	#N/A	0	#N/A	#N/A	#N/A	#N/A	0	14	0.173529	0.452537	0.132646	0	0	12	0.0761812	0.527048	0.308195	0	0	#N/A	#N/A	#N/A	#N/A	0	0		0	NULL		0	NULL		0	NULL		0		0		0
Ap2a2	#N/A	#N/A	#N/A	#N/A	0	2	1.30812	0.805214	0.755558	0	2	0.905274	0.358585	0.239456	0	5	-0.053596	0.962651	0.890917	0	0	5	-0.0125437	0.654822	0.456898	0	0	#N/A	#N/A	#N/A	#N/A	0	0		0	NULL		0	NULL		0	NULL		0		0		0
Ap2b1	#N/A	#N/A	#N/A	#N/A	0	#N/A	#N/A	#N/A	#N/A	0	#N/A	#N/A	#N/A	#N/A	0	16	0.145462	0.566201	0.247821	0	0	12	-0.0309394	0.934276	0.87971	0	0	#N/A	#N/A	#N/A	#N/A	0	0		0	NULL		0	NULL		0	NULL		0		0		0
Ap2m1	2	4.13898	1.01946e-06	1.67043e-07	0	2	-2.56805	0.0417553	0.0158539	0	2	-4.16739	0.00675437	0.000824899	0	16	-0.0196064	0.99776	0.984305	0	0	10	-0.105895	0.543282	0.326975	0	0	#N/A	#N/A	#N/A	#N/A	0	0		0	NULL		0	NULL		0	NULL		0		0		0
Ap3b1	#N/A	#N/A	#N/A	#N/A	0	#N/A	#N/A	#N/A	#N/A	0	#N/A	#N/A	#N/A	#N/A	0	4	-0.212305	0.858226	0.699859	0	0	2	-0.292351	0.743721	0.578979	0	0	#N/A	#N/A	#N/A	#N/A	0	0		0	NULL		0	NULL		0	NULL		0		0		0
Ap3d1	#N/A	#N/A	#N/A	#N/A	0	#N/A	#N/A	#N/A	#N/A	0	#N/A	#N/A	#N/A	#N/A	0	5	0.115658	0.829782	0.634606	0	0	4	-0.00878451	0.542999	0.326418	0	0	#N/A	#N/A	#N/A	#N/A	0	0		0	NULL		0	NULL		0	NULL		0		0		0
Apc	25	4.18561	2.27636e-07	3.29112e-08	Drosha IP	#N/A	#N/A	#N/A	#N/A	0	#N/A	#N/A	#N/A	#N/A	0	#N/A	#N/A	#N/A	#N/A	0	0	#N/A	#N/A	#N/A	#N/A	0	0	#N/A	#N/A	#N/A	#N/A	0	0		0	NULL		0	NULL		1	Apc		0		0		0
Apex1	#N/A	#N/A	#N/A	#N/A	0	9	1.03491	0.0445135	0.0173856	PD 3' UTR (vs AR RNA)	9	1.92767	0.0120602	0.0023187	PD 5' UTR (vs AR RNA)	13	0.51666	0.185416	0.0118435	0	0	15	0.318001	0.175603	0.0428712	0	0	15	-0.30041	0.187237	0.0402594	0	0		1	NULL		1	Apex1		0	NULL		0		1	Apex1	0
Api5	#N/A	#N/A	#N/A	#N/A	0	2	0.0854692	0.720884	0.647056	0	2	0.444787	0.666015	0.563737	0	6	-0.028397	0.584185	0.274939	0	0	8	0.298644	0.234954	0.0754733	0	0	#N/A	#N/A	#N/A	#N/A	0	0		0	NULL		0	NULL		0	NULL		0		0		0
Apoe	2	1.04552	0.2556	0.250981	0	#N/A	#N/A	#N/A	#N/A	0	#N/A	#N/A	#N/A	#N/A	0	18	0.0518344	0.655913	0.364296	0	0	19	0.0764387	0.715268	0.540426	0	0	#N/A	#N/A	#N/A	#N/A	0	0		0	NULL		0	NULL		0	NULL		0		0		0
Apoo	#N/A	#N/A	#N/A	#N/A	0	#N/A	#N/A	#N/A	#N/A	0	#N/A	#N/A	#N/A	#N/A	0	#N/A	#N/A	#N/A	#N/A	0	0	2	0.440605	0.168195	0.0393728	0	0	#N/A	#N/A	#N/A	#N/A	0	0		0	NULL		0	NULL		0	NULL		0		0		0
Apool	#N/A	#N/A	#N/A	#N/A	0	#N/A	#N/A	#N/A	#N/A	0	#N/A	#N/A	#N/A	#N/A	0	2	-0.00346262	0.937535	0.845046	0	0	3	0.00927043	0.52778	0.308999	0	0	#N/A	#N/A	#N/A	#N/A	0	0		0	NULL		0	NULL		0	NULL		0		0		0
Appl2	#N/A	#N/A	#N/A	#N/A	0	#N/A	#N/A	#N/A	#N/A	0	#N/A	#N/A	#N/A	#N/A	0	#N/A	#N/A	#N/A	#N/A	0	0	#N/A	#N/A	#N/A	#N/A	0	0	#N/A	#N/A	#N/A	#N/A	0	0		0	NULL		0	NULL		0	NULL		0		0		0
Aqr	#N/A	#N/A	#N/A	#N/A	0	3	-1.56427	0.0339941	0.0118794	0	3	-1.97932	0.019953	0.00511649	0	3	-0.173962	0.858794	0.70398	0	0	4	-0.306416	0.115259	0.0168936	0	0	#N/A	#N/A	#N/A	#N/A	0	0		0	NULL		0	NULL		0	NULL		0		0		0
Arcn1	#N/A	#N/A	#N/A	#N/A	0	#N/A	#N/A	#N/A	#N/A	0	#N/A	#N/A	#N/A	#N/A	0	6	-0.120342	0.723325	0.463011	0	0	5	0.0375404	0.962104	0.929729	0	0	#N/A	#N/A	#N/A	#N/A	0	0		0	NULL		0	NULL		0	NULL		0		0		0
Arf3	#N/A	#N/A	#N/A	#N/A	0	3	-1.86069	0.0181043	0.00468478	0	3	-0.168276	0.845552	0.779094	0	3	-0.750264	0.282134	0.0325622	0	0	2	-0.739679	0.168195	0.0393663	0	0	#N/A	#N/A	#N/A	#N/A	0	0		0	NULL		0	NULL		0	NULL		0		0		0
Arf4	#N/A	#N/A	#N/A	#N/A	0	#N/A	#N/A	#N/A	#N/A	0	#N/A	#N/A	#N/A	#N/A	0	5	-0.272671	0.46839	0.144288	0	0	5	-0.227553	0.614951	0.409092	0	0	#N/A	#N/A	#N/A	#N/A	0	0		0	NULL		0	NULL		0	NULL		0		0		0
Arglu1	#N/A	#N/A	#N/A	#N/A	0	2	-2.36984	0.0177341	0.00446034	0	2	-4.28215	0.00480549	0.000356182	0	#N/A	#N/A	#N/A	#N/A	0	0	#N/A	#N/A	#N/A	#N/A	0	0	#N/A	#N/A	#N/A	#N/A	0	0		0	NULL		0	NULL		0	NULL		0		0		0
Arhgap11a	2	2.20996	0.0121726	0.0104861	0	#N/A	#N/A	#N/A	#N/A	0	#N/A	#N/A	#N/A	#N/A	0	#N/A	#N/A	#N/A	#N/A	0	0	#N/A	#N/A	#N/A	#N/A	0	0	#N/A	#N/A	#N/A	#N/A	0	0		0	NULL		0	NULL		0	NULL		0		0		0
Arhgap12	7	1.91267	0.0074771	0.00593663	0	#N/A	#N/A	#N/A	#N/A	0	#N/A	#N/A	#N/A	#N/A	0	2	-0.75374	0.565457	0.246039	0	0	#N/A	#N/A	#N/A	#N/A	0	0	#N/A	#N/A	#N/A	#N/A	0	0		0	NULL		0	NULL		0	NULL		0		0		0
Arhgap18	#N/A	#N/A	#N/A	#N/A	0	#N/A	#N/A	#N/A	#N/A	0	#N/A	#N/A	#N/A	#N/A	0	4	0.372724	0.969637	0.920088	0	0	#N/A	#N/A	#N/A	#N/A	0	0	#N/A	#N/A	#N/A	#N/A	0	0		0	NULL		0	NULL		0	NULL		0		0		0
Arhgap21	29	1.76713	0.0110286	0.00929289	0	#N/A	#N/A	#N/A	#N/A	0	#N/A	#N/A	#N/A	#N/A	0	#N/A	#N/A	#N/A	#N/A	0	0	#N/A	#N/A	#N/A	#N/A	0	0	#N/A	#N/A	#N/A	#N/A	0	0		0	NULL		0	NULL		0	NULL		0		0		0
Arhgap42	5	1.80364	0.0134054	0.0117257	0	#N/A	#N/A	#N/A	#N/A	0	#N/A	#N/A	#N/A	#N/A	0	#N/A	#N/A	#N/A	#N/A	0	0	#N/A	#N/A	#N/A	#N/A	0	0	#N/A	#N/A	#N/A	#N/A	0	0		0	NULL		0	NULL		0	NULL		0		0		0
Arhgap5	#N/A	#N/A	#N/A	#N/A	0	#N/A	#N/A	#N/A	#N/A	0	#N/A	#N/A	#N/A	#N/A	0	2	-0.860439	0.363938	0.0730494	0	0	#N/A	#N/A	#N/A	#N/A	0	0	#N/A	#N/A	#N/A	#N/A	0	0		0	NULL		0	NULL		0	NULL		0		0		0
Arhgdia	#N/A	#N/A	#N/A	#N/A	0	3	-1.3933	0.0538954	0.0221768	0	3	-1.97368	0.217414	0.125664	0	#N/A	#N/A	#N/A	#N/A	0	0	#N/A	#N/A	#N/A	#N/A	0	0	#N/A	#N/A	#N/A	#N/A	0	0		0	NULL		0	NULL		0	NULL		0		0		0
Arhgef2	2	2.67345	0.000874607	0.000390944	0	#N/A	#N/A	#N/A	#N/A	0	#N/A	#N/A	#N/A	#N/A	0	#N/A	#N/A	#N/A	#N/A	0	0	2	-0.199228	0.897564	0.813195	0	0	#N/A	#N/A	#N/A	#N/A	0	0		0	NULL		0	NULL		0	NULL		0		0		0
Arhgef40	3	2.15672	0.00806272	0.00645989	0	#N/A	#N/A	#N/A	#N/A	0	#N/A	#N/A	#N/A	#N/A	0	#N/A	#N/A	#N/A	#N/A	0	0	#N/A	#N/A	#N/A	#N/A	0	0	#N/A	#N/A	#N/A	#N/A	0	0		0	NULL		0	NULL		0	NULL		0		0		0
Arl8a	#N/A	#N/A	#N/A	#N/A	0	#N/A	#N/A	#N/A	#N/A	0	#N/A	#N/A	#N/A	#N/A	0	3	-0.0995539	0.960233	0.887196	0	0	2	0.115445	0.285232	0.105641	0	0	#N/A	#N/A	#N/A	#N/A	0	0		0	NULL		0	NULL		0	NULL		0		0		0
Arpc1a	2	2.70181	0.000201974	6.76493e-05	0	#N/A	#N/A	#N/A	#N/A	0	#N/A	#N/A	#N/A	#N/A	0	#N/A	#N/A	#N/A	#N/A	0	0	#N/A	#N/A	#N/A	#N/A	0	0	#N/A	#N/A	#N/A	#N/A	0	0		0	NULL		0	NULL		0	NULL		0		0		0
Arpc1b	12	2.07211	0.00477884	0.00346034	0	#N/A	#N/A	#N/A	#N/A	0	#N/A	#N/A	#N/A	#N/A	0	2	0.0307686	0.766986	0.541686	0	0	#N/A	#N/A	#N/A	#N/A	0	0	#N/A	#N/A	#N/A	#N/A	0	0		0	NULL		0	NULL		0	NULL		0		0		0
Arpc2	3	4.82028	2.9219e-07	4.32558e-08	0	2	-2.01694	0.273191	0.189945	0	2	-2.91384	0.116001	0.0579302	0	4	-0.313739	0.507081	0.170946	0	0	2	0.0403541	0.534136	0.318047	0	0	#N/A	#N/A	#N/A	#N/A	0	0		0	NULL		0	NULL		0	NULL		0		0		0
Arpc3	3	1.84208	0.0188489	0.0170321	0	#N/A	#N/A	#N/A	#N/A	0	#N/A	#N/A	#N/A	#N/A	0	#N/A	#N/A	#N/A	#N/A	0	0	#N/A	#N/A	#N/A	#N/A	0	0	#N/A	#N/A	#N/A	#N/A	0	0		0	NULL		0	NULL		0	NULL		0		0		0
Arpc4	6	2.92021	0.00576283	0.00434642	0	#N/A	#N/A	#N/A	#N/A	0	#N/A	#N/A	#N/A	#N/A	0	4	-0.0709265	0.967044	0.909477	0	0	3	-0.0657441	0.933905	0.874788	0	0	#N/A	#N/A	#N/A	#N/A	0	0		0	NULL		0	NULL		0	NULL		0		0		0
Asna1	#N/A	#N/A	#N/A	#N/A	0	#N/A	#N/A	#N/A	#N/A	0	#N/A	#N/A	#N/A	#N/A	0	4	0.0526189	0.757554	0.522675	0	0	4	0.0990962	0.510944	0.290045	0	0	#N/A	#N/A	#N/A	#N/A	0	0		0	NULL		0	NULL		0	NULL		0		0		0
Asph	#N/A	#N/A	#N/A	#N/A	0	2	-6.82397	0.00379845	0.000273231	0	2	-6.16254	0.00368616	0.000245149	0	14	-0.0877408	0.560159	0.227331	0	0	10	0.285982	0.250281	0.0823575	0	0	#N/A	#N/A	#N/A	#N/A	0	0		0	NULL		0	NULL		0	NULL		0		0		0
Ass1	#N/A	#N/A	#N/A	#N/A	0	2	-5.24935	0.0064192	0.000856132	0	2	-3.45672	0.0214322	0.00570143	0	#N/A	#N/A	#N/A	#N/A	0	0	#N/A	#N/A	#N/A	#N/A	0	0	#N/A	#N/A	#N/A	#N/A	0	0		0	NULL		0	NULL		0	NULL		0		0		0
Astn1	#N/A	#N/A	#N/A	#N/A	0	#N/A	#N/A	#N/A	#N/A	0	#N/A	#N/A	#N/A	#N/A	0	2	0.295911	0.677206	0.405651	0	0	#N/A	#N/A	#N/A	#N/A	0	0	#N/A	#N/A	#N/A	#N/A	0	0		0	NULL		0	NULL		0	NULL		0		0		0
Atad1	#N/A	#N/A	#N/A	#N/A	0	#N/A	#N/A	#N/A	#N/A	0	#N/A	#N/A	#N/A	#N/A	0	8	-0.311761	0.319838	0.0476692	0	0	8	0.0283034	0.919448	0.843482	0	0	#N/A	#N/A	#N/A	#N/A	0	0		0	NULL		0	NULL		0	NULL		0		0		0
Atad3	25	2.39507	0.00315289	0.00208547	0	#N/A	#N/A	#N/A	#N/A	0	#N/A	#N/A	#N/A	#N/A	0	13	0.299703	0.923415	0.802827	0	0	14	0.18425	0.70519	0.522974	0	0	#N/A	#N/A	#N/A	#N/A	0	0		0	NULL		0	NULL		0	NULL		0		0		0
Atic	#N/A	#N/A	#N/A	#N/A	0	#N/A	#N/A	#N/A	#N/A	0	#N/A	#N/A	#N/A	#N/A	0	2	-0.245076	0.96527	0.899503	0	0	#N/A	#N/A	#N/A	#N/A	0	0	#N/A	#N/A	#N/A	#N/A	0	0		0	NULL		0	NULL		0	NULL		0		0		0
Atp13a1	#N/A	#N/A	#N/A	#N/A	0	#N/A	#N/A	#N/A	#N/A	0	#N/A	#N/A	#N/A	#N/A	0	16	0.0814587	0.937535	0.844583	0	0	12	0.124466	0.446713	0.232583	0	0	#N/A	#N/A	#N/A	#N/A	0	0		0	NULL		0	NULL		0	NULL		0		0		0
Atp1a1	3	3.48332	5.66922e-05	1.53684e-05	0	#N/A	#N/A	#N/A	#N/A	0	#N/A	#N/A	#N/A	#N/A	0	4	0.0958379	0.636283	0.345914	0	0	5	0.46625	0.162263	0.0353966	0	0	#N/A	#N/A	#N/A	#N/A	0	0		0	NULL		0	NULL		0	NULL		0		0		0
Atp1a2	13	3.01248	0.000444844	0.00017365	Drosha IP	#N/A	#N/A	#N/A	#N/A	0	#N/A	#N/A	#N/A	#N/A	0	47	0.0628279	0.74299	0.498315	0	0	49	0.348649	0.151206	0.0292376	0	0	#N/A	#N/A	#N/A	#N/A	0	0		0	NULL		0	NULL		1	Atp1a2		0		0		0
Atp1a3	#N/A	#N/A	#N/A	#N/A	0	2	-1.82719	0.0311377	0.00997761	0	2	-3.60766	0.0172443	0.00402437	0	#N/A	#N/A	#N/A	#N/A	0	0	#N/A	#N/A	#N/A	#N/A	0	0	#N/A	#N/A	#N/A	#N/A	0	0		0	NULL		0	NULL		0	NULL		0		0		0
Atp1b1	#N/A	#N/A	#N/A	#N/A	0	#N/A	#N/A	#N/A	#N/A	0	#N/A	#N/A	#N/A	#N/A	0	4	-0.144633	0.967044	0.912597	0	0	3	0.372755	0.165398	0.0376101	0	0	#N/A	#N/A	#N/A	#N/A	0	0		0	NULL		0	NULL		0	NULL		0		0		0
Atp1b2	#N/A	#N/A	#N/A	#N/A	0	#N/A	#N/A	#N/A	#N/A	0	#N/A	#N/A	#N/A	#N/A	0	8	0.0510314	0.942554	0.852245	0	0	6	0.337023	0.959591	0.925417	0	0	#N/A	#N/A	#N/A	#N/A	0	0		0	NULL		0	NULL		0	NULL		0		0		0
Atp2a2	5	3.11268	0.000528212	0.000213194	Drosha IP	4	0.347493	0.555251	0.459912	0	4	2.0516	0.0474432	0.0173251	PD 5' UTR (vs AR RNA)	39	-0.167806	0.755592	0.520259	0	0	38	0.0818043	0.625932	0.427988	0	0	39	-0.187985	0.874782	0.767768	0	0		0	NULL		1	Atp2a2		1	Atp2a2		0		0		0
Atp2b1	#N/A	#N/A	#N/A	#N/A	0	#N/A	#N/A	#N/A	#N/A	0	#N/A	#N/A	#N/A	#N/A	0	#N/A	#N/A	#N/A	#N/A	0	0	3	1.22016	0.113076	0.0158503	0	0	#N/A	#N/A	#N/A	#N/A	0	0		0	NULL		0	NULL		0	NULL		0		0		0
Atp5a1	13	2.5836	0.00333929	0.00224497	0	18	-2.37619	0.00500402	0.000544573	0	18	-0.919699	0.160808	0.08614	0	#N/A	#N/A	#N/A	#N/A	0	0	#N/A	#N/A	#N/A	#N/A	0	0	#N/A	#N/A	#N/A	#N/A	0	0		0	NULL		0	NULL		0	NULL		0		0		0
Atp5b	8	2.76063	0.000690125	0.000296006	0	15	-1.76573	0.0292756	0.00904247	0	15	-0.0976595	0.999476	0.999248	0	#N/A	#N/A	#N/A	#N/A	0	0	#N/A	#N/A	#N/A	#N/A	0	0	#N/A	#N/A	#N/A	#N/A	0	0		0	NULL		0	NULL		0	NULL		0		0		0
Atp5c1	4	2.81129	0.00143306	0.00075106	0	#N/A	#N/A	#N/A	#N/A	0	#N/A	#N/A	#N/A	#N/A	0	#N/A	#N/A	#N/A	#N/A	0	0	#N/A	#N/A	#N/A	#N/A	0	0	#N/A	#N/A	#N/A	#N/A	0	0		0	NULL		0	NULL		0	NULL		0		0		0
Atp5d	#N/A	#N/A	#N/A	#N/A	0	2	-3.97659	0.00389548	0.000306174	0	2	-1.70941	0.0196195	0.00493468	0	#N/A	#N/A	#N/A	#N/A	0	0	#N/A	#N/A	#N/A	#N/A	0	0	#N/A	#N/A	#N/A	#N/A	0	0		0	NULL		0	NULL		0	NULL		0		0		0
Atp5e	#N/A	#N/A	#N/A	#N/A	0	#N/A	#N/A	#N/A	#N/A	0	#N/A	#N/A	#N/A	#N/A	0	2	0.585276	0.200584	0.0136665	0	0	4	0.766903	0.11953	0.0186447	0	0	#N/A	#N/A	#N/A	#N/A	0	0		0	NULL		0	NULL		0	NULL		0		0		0
Atp5f1	3	-0.372899	0.881881	0.878693	0	#N/A	#N/A	#N/A	#N/A	0	#N/A	#N/A	#N/A	#N/A	0	11	0.322035	0.51642	0.178249	0	0	11	0.44566	0.340569	0.139963	0	0	#N/A	#N/A	#N/A	#N/A	0	0		0	NULL		0	NULL		0	NULL		0		0		0
Atp5h	2	1.93223	0.00315635	0.00209378	0	3	0.662642	0.67841	0.598018	0	3	2.13184	0.0669343	0.0274342	0	10	0.418942	0.359818	0.0681837	0	0	12	0.392398	0.190958	0.0501878	0	0	#N/A	#N/A	#N/A	#N/A	0	0		0	NULL		0	NULL		0	NULL		0		0		0
Atp5i	#N/A	#N/A	#N/A	#N/A	0	#N/A	#N/A	#N/A	#N/A	0	#N/A	#N/A	#N/A	#N/A	0	5	0.353448	0.324146	0.0496916	0	0	4	0.618495	0.129246	0.022162	0	0	#N/A	#N/A	#N/A	#N/A	0	0		0	NULL		0	NULL		0	NULL		0		0		0
Atp5j	#N/A	#N/A	#N/A	#N/A	0	#N/A	#N/A	#N/A	#N/A	0	#N/A	#N/A	#N/A	#N/A	0	5	0.0747859	0.608459	0.308404	0	0	5	0.481363	0.117189	0.0178622	0	0	#N/A	#N/A	#N/A	#N/A	0	0		0	NULL		0	NULL		0	NULL		0		0		0
Atp5j2	2	2.5332	0.00483778	0.00351467	0	#N/A	#N/A	#N/A	#N/A	0	#N/A	#N/A	#N/A	#N/A	0	3	-0.0127594	0.848954	0.686273	0	0	4	0.51518	0.0888885	0.00867359	0	0	#N/A	#N/A	#N/A	#N/A	0	0		0	NULL		0	NULL		0	NULL		0		0		0
Atp5l	#N/A	#N/A	#N/A	#N/A	0	#N/A	#N/A	#N/A	#N/A	0	#N/A	#N/A	#N/A	#N/A	0	4	0.38487	0.283388	0.0337893	0	0	6	0.196714	0.184581	0.0466166	0	0	#N/A	#N/A	#N/A	#N/A	0	0		0	NULL		0	NULL		0	NULL		0		0		0
Atp5o	3	2.2258	0.0133712	0.0116797	0	3	-1.6455	0.22481	0.149239	0	3	-4.29499	0.0109316	0.00191666	0	16	0.484952	0.185416	0.0114426	0	0	15	0.605641	0.124702	0.0206948	0	0	#N/A	#N/A	#N/A	#N/A	0	0		0	NULL		0	NULL		0	NULL		0		0		0
Atp6v1b2	2	3.36715	0.00245152	0.00147978	0	#N/A	#N/A	#N/A	#N/A	0	#N/A	#N/A	#N/A	#N/A	0	#N/A	#N/A	#N/A	#N/A	0	0	#N/A	#N/A	#N/A	#N/A	0	0	#N/A	#N/A	#N/A	#N/A	0	0		0	NULL		0	NULL		0	NULL		0		0		0
Atpif1	#N/A	#N/A	#N/A	#N/A	0	#N/A	#N/A	#N/A	#N/A	0	#N/A	#N/A	#N/A	#N/A	0	#N/A	#N/A	#N/A	#N/A	0	0	#N/A	#N/A	#N/A	#N/A	0	0	#N/A	#N/A	#N/A	#N/A	0	0		0	NULL		0	NULL		0	NULL		0		0		0
Atrx	#N/A	#N/A	#N/A	#N/A	0	#N/A	#N/A	#N/A	#N/A	0	#N/A	#N/A	#N/A	#N/A	0	6	1.02539	0.425538	0.116849	0	0	3	0.115554	0.922086	0.849186	0	0	#N/A	#N/A	#N/A	#N/A	0	0		0	NULL		0	NULL		0	NULL		0		0		0
Atxn10	#N/A	#N/A	#N/A	#N/A	0	2	0.873913	0.158583	0.0974127	0	2	2.74497	0.0119816	0.00221938	0	12	-0.163044	0.848343	0.682012	0	0	11	-0.151116	0.409763	0.197877	0	0	#N/A	#N/A	#N/A	#N/A	0	0		0	NULL		0	NULL		0	NULL		0		0		0
Atxn2	6	2.6864	0.00278696	0.00176955	0	#N/A	#N/A	#N/A	#N/A	0	#N/A	#N/A	#N/A	#N/A	0	5	-0.0490239	0.845559	0.674527	0	0	2	0.666155	0.399133	0.185637	0	0	#N/A	#N/A	#N/A	#N/A	0	0		0	NULL		0	NULL		0	NULL		0		0		0
Atxn2l	9	2.71576	0.000558072	0.000226591	0	#N/A	#N/A	#N/A	#N/A	0	#N/A	#N/A	#N/A	#N/A	0	4	0.231637	0.584061	0.271661	0	0	2	0.180952	0.818023	0.683073	0	0	#N/A	#N/A	#N/A	#N/A	0	0		0	NULL		0	NULL		0	NULL		0		0		0
Aurkb	3	1.30665	0.0540685	0.0511371	0	#N/A	#N/A	#N/A	#N/A	0	#N/A	#N/A	#N/A	#N/A	0	#N/A	#N/A	#N/A	#N/A	0	0	#N/A	#N/A	#N/A	#N/A	0	0	#N/A	#N/A	#N/A	#N/A	0	0		0	NULL		0	NULL		0	NULL		0		0		0
Axin2	3	3.9394	9.19195e-06	1.94914e-06	0	#N/A	#N/A	#N/A	#N/A	0	#N/A	#N/A	#N/A	#N/A	0	#N/A	#N/A	#N/A	#N/A	0	0	#N/A	#N/A	#N/A	#N/A	0	0	#N/A	#N/A	#N/A	#N/A	0	0		0	NULL		0	NULL		0	NULL		0		0		0
Baiap2	10	1.94618	0.0250809	0.0230866	0	#N/A	#N/A	#N/A	#N/A	0	#N/A	#N/A	#N/A	#N/A	0	#N/A	#N/A	#N/A	#N/A	0	0	#N/A	#N/A	#N/A	#N/A	0	0	#N/A	#N/A	#N/A	#N/A	0	0		0	NULL		0	NULL		0	NULL		0		0		0
Basp1	#N/A	#N/A	#N/A	#N/A	0	2	-1.60822	0.186279	0.11848	0	2	-3.45754	0.0489427	0.0181686	0	#N/A	#N/A	#N/A	#N/A	0	0	#N/A	#N/A	#N/A	#N/A	0	0	#N/A	#N/A	#N/A	#N/A	0	0		0	NULL		0	NULL		0	NULL		0		0		0
Bax	#N/A	#N/A	#N/A	#N/A	0	#N/A	#N/A	#N/A	#N/A	0	#N/A	#N/A	#N/A	#N/A	0	2	-0.0215464	0.771438	0.556511	0	0	#N/A	#N/A	#N/A	#N/A	0	0	#N/A	#N/A	#N/A	#N/A	0	0		0	NULL		0	NULL		0	NULL		0		0		0
Baz1b	#N/A	#N/A	#N/A	#N/A	0	#N/A	#N/A	#N/A	#N/A	0	#N/A	#N/A	#N/A	#N/A	0	5	0.483321	0.172441	0.00954603	0	0	#N/A	#N/A	#N/A	#N/A	0	0	#N/A	#N/A	#N/A	#N/A	0	0		0	NULL		0	NULL		0	NULL		0		0		0
Bcap31	#N/A	#N/A	#N/A	#N/A	0	#N/A	#N/A	#N/A	#N/A	0	#N/A	#N/A	#N/A	#N/A	0	13	0.209449	0.671255	0.391527	0	0	11	0.275846	0.190587	0.0499544	0	0	#N/A	#N/A	#N/A	#N/A	0	0		0	NULL		0	NULL		0	NULL		0		0		0
Bcas2	#N/A	#N/A	#N/A	#N/A	0	#N/A	#N/A	#N/A	#N/A	0	#N/A	#N/A	#N/A	#N/A	0	3	-0.0462634	0.903657	0.77048	0	0	#N/A	#N/A	#N/A	#N/A	0	0	#N/A	#N/A	#N/A	#N/A	0	0		0	NULL		0	NULL		0	NULL		0		0		0
Bckdk	#N/A	#N/A	#N/A	#N/A	0	#N/A	#N/A	#N/A	#N/A	0	#N/A	#N/A	#N/A	#N/A	0	#N/A	#N/A	#N/A	#N/A	0	0	3	-0.140574	0.686401	0.49905	0	0	#N/A	#N/A	#N/A	#N/A	0	0		0	NULL		0	NULL		0	NULL		0		0		0
Bclaf1	28	3.42003	2.03217e-05	4.62746e-06	Drosha IP	4	-0.41253	0.747094	0.683471	0	4	1.91792	0.606439	0.49791	0	58	0.792405	0.296082	0.0376144	0	0	52	0.0346546	0.864489	0.751051	0	0	#N/A	#N/A	#N/A	#N/A	0	0		0	NULL		0	NULL		1	Bclaf1		0		0		0
Bdh1	#N/A	#N/A	#N/A	#N/A	0	#N/A	#N/A	#N/A	#N/A	0	#N/A	#N/A	#N/A	#N/A	0	4	-0.0927306	0.80693	0.60305	0	0	3	0.132069	0.964278	0.934059	0	0	#N/A	#N/A	#N/A	#N/A	0	0		0	NULL		0	NULL		0	NULL		0		0		0
Brix1	#N/A	#N/A	#N/A	#N/A	0	#N/A	#N/A	#N/A	#N/A	0	#N/A	#N/A	#N/A	#N/A	0	5	-0.215425	0.866803	0.713781	0	0	#N/A	#N/A	#N/A	#N/A	0	0	#N/A	#N/A	#N/A	#N/A	0	0		0	NULL		0	NULL		0	NULL		0		0		0
Brwd3	2	-0.624304	0.335285	0.330841	0	#N/A	#N/A	#N/A	#N/A	0	#N/A	#N/A	#N/A	#N/A	0	#N/A	#N/A	#N/A	#N/A	0	0	#N/A	#N/A	#N/A	#N/A	0	0	#N/A	#N/A	#N/A	#N/A	0	0		0	NULL		0	NULL		0	NULL		0		0		0
Btbd17	#N/A	#N/A	#N/A	#N/A	0	#N/A	#N/A	#N/A	#N/A	0	#N/A	#N/A	#N/A	#N/A	0	2	0.427349	0.584185	0.273628	0	0	2	0.166404	0.441621	0.226114	0	0	#N/A	#N/A	#N/A	#N/A	0	0		0	NULL		0	NULL		0	NULL		0		0		0
Btf3	#N/A	#N/A	#N/A	#N/A	0	3	-0.218784	0.581041	0.489705	0	3	0.31193	0.684762	0.589541	0	7	0.26495	0.560159	0.232688	0	0	7	0.150905	0.438764	0.221257	0	0	#N/A	#N/A	#N/A	#N/A	0	0		0	NULL		0	NULL		0	NULL		0		0		0
Btf3l4	#N/A	#N/A	#N/A	#N/A	0	#N/A	#N/A	#N/A	#N/A	0	#N/A	#N/A	#N/A	#N/A	0	4	-0.595185	0.937518	0.838717	0	0	3	0.203264	0.676136	0.483986	0	0	#N/A	#N/A	#N/A	#N/A	0	0		0	NULL		0	NULL		0	NULL		0		0		0
Bub3	5	4.66669	5.54203e-08	7.27808e-09	Drosha IP	2	1.66647	0.064379	0.0287253	0	2	2.74153	0.00903694	0.00144241	0	2	0.751401	0.185416	0.0114147	0	0	5	0.0939393	0.747648	0.588305	0	0	#N/A	#N/A	#N/A	#N/A	0	0		0	NULL		0	NULL		1	Bub3		0		0		0
Bud31	#N/A	#N/A	#N/A	#N/A	0	#N/A	#N/A	#N/A	#N/A	0	#N/A	#N/A	#N/A	#N/A	0	2	-0.114475	0.883748	0.736352	0	0	2	-0.277518	0.871944	0.76202	0	0	#N/A	#N/A	#N/A	#N/A	0	0		0	NULL		0	NULL		0	NULL		0		0		0
Bzw1	#N/A	#N/A	#N/A	#N/A	0	2	-1.77032	0.201273	0.129628	0	2	1.09114	0.798396	0.71344	0	2	0.000830178	0.595032	0.287629	0	0	#N/A	#N/A	#N/A	#N/A	0	0	#N/A	#N/A	#N/A	#N/A	0	0		0	NULL		0	NULL		0	NULL		0		0		0
Cacybp	#N/A	#N/A	#N/A	#N/A	0	3	-5.89408	0.00379845	0.000277627	0	3	-5.82053	0.00561447	0.000542051	0	2	-0.998292	0.103701	0.00262085	0	0	#N/A	#N/A	#N/A	#N/A	0	0	#N/A	#N/A	#N/A	#N/A	0	0		0	NULL		0	NULL		0	NULL		0		0		0
Cad	#N/A	#N/A	#N/A	#N/A	0	#N/A	#N/A	#N/A	#N/A	0	#N/A	#N/A	#N/A	#N/A	0	12	-0.261222	0.737366	0.487175	0	0	9	-0.166512	0.402684	0.190146	0	0	#N/A	#N/A	#N/A	#N/A	0	0		0	NULL		0	NULL		0	NULL		0		0		0
Calm1	12	2.02926	0.0110785	0.00937003	0	8	-1.25537	0.105591	0.0572354	0	8	0.286327	0.953496	0.924672	0	#N/A	#N/A	#N/A	#N/A	0	0	#N/A	#N/A	#N/A	#N/A	0	0	#N/A	#N/A	#N/A	#N/A	0	0		0	NULL		0	NULL		0	NULL		0		0		0
Calr	#N/A	#N/A	#N/A	#N/A	0	6	-1.77482	0.0589192	0.0252918	0	6	-0.620417	0.612767	0.505329	0	#N/A	#N/A	#N/A	#N/A	0	0	#N/A	#N/A	#N/A	#N/A	0	0	#N/A	#N/A	#N/A	#N/A	0	0		0	NULL		0	NULL		0	NULL		0		0		0
Camk2b	12	2.9511	0.00046978	0.000184868	0	5	0.736337	0.205872	0.133431	0	5	2.00919	0.014718	0.00320343	PD 5' UTR (vs AR RNA)	14	0.423981	0.559571	0.212059	0	0	11	0.0283318	0.784342	0.638896	0	0	10	0.0945996	0.927152	0.860696	0	0		0	NULL		1	Camk2b		0	NULL		0		0		1	Camk2b
Cand1	#N/A	#N/A	#N/A	#N/A	0	3	-3.88351	0.00478802	0.000474749	0	3	-2.94415	0.0247957	0.00698596	0	7	-0.0449142	0.581652	0.26754	0	0	4	-0.0864141	0.947683	0.906972	0	0	#N/A	#N/A	#N/A	#N/A	0	0		0	NULL		0	NULL		0	NULL		0		0		0
Canx	2	0.569483	0.125547	0.121766	0	7	0.406049	0.46999	0.375082	0	7	2.5705	0.0078141	0.0010719	PD 5' UTR (vs AR RNA)	35	-0.319283	0.908251	0.779996	0	0	29	0.0605141	0.617131	0.413081	0	0	33	-0.169179	0.929569	0.869387	0	0		0	NULL		1	Canx		0	NULL		0		0		1	Canx
Cap1	#N/A	#N/A	#N/A	#N/A	0	2	-1.74187	0.00944365	0.00159868	0	2	-1.80745	0.0223177	0.00609892	0	7	-0.00332846	0.721931	0.453222	0	0	6	-0.241402	0.358715	0.15202	0	0	#N/A	#N/A	#N/A	#N/A	0	0		0	NULL		0	NULL		0	NULL		0		0		0
Capn2	#N/A	#N/A	#N/A	#N/A	0	#N/A	#N/A	#N/A	#N/A	0	#N/A	#N/A	#N/A	#N/A	0	3	0.014801	0.584061	0.270154	0	0	3	0.136636	0.242515	0.0787657	0	0	#N/A	#N/A	#N/A	#N/A	0	0		0	NULL		0	NULL		0	NULL		0		0		0
Caprin1	10	3.25146	7.60915e-05	2.1544e-05	Drosha IP	6	1.66037	0.0159983	0.00377773	PD 3' UTR (vs AR RNA)	6	2.07443	0.0173367	0.00416989	PD 5' UTR (vs AR RNA)	20	-0.189371	0.845034	0.672908	0	0	15	0.125499	0.971269	0.949824	0	0	19	0.948814	0.0428721	0.00166092	0	0		1	NULL		1	Caprin1		1	Caprin1		0		0		0
Capza1	10	2.34039	0.00585027	0.00443352	0	2	1.28968	0.0539234	0.0222996	0	2	2.15324	0.0265839	0.00784337	0	#N/A	#N/A	#N/A	#N/A	0	0	#N/A	#N/A	#N/A	#N/A	0	0	#N/A	#N/A	#N/A	#N/A	0	0		0	NULL		0	NULL		0	NULL		0		0		0
Capza2	18	2.52095	0.00253688	0.00156492	0	4	0.485832	0.724064	0.654022	0	4	1.49842	0.625624	0.518958	0	6	-0.354387	0.608459	0.30622	0	0	3	-0.333761	0.214738	0.0625554	0	0	#N/A	#N/A	#N/A	#N/A	0	0		0	NULL		0	NULL		0	NULL		0		0		0
Capzb	21	3.28766	0.000143662	4.54525e-05	Drosha IP	#N/A	#N/A	#N/A	#N/A	0	#N/A	#N/A	#N/A	#N/A	0	4	-0.385619	0.608459	0.312094	0	0	2	0.312847	0.654822	0.457069	0	0	#N/A	#N/A	#N/A	#N/A	0	0		0	NULL		0	NULL		1	Capzb		0		0		0
Casc4	#N/A	#N/A	#N/A	#N/A	0	#N/A	#N/A	#N/A	#N/A	0	#N/A	#N/A	#N/A	#N/A	0	3	-0.206298	0.671255	0.390831	0	0	#N/A	#N/A	#N/A	#N/A	0	0	#N/A	#N/A	#N/A	#N/A	0	0		0	NULL		0	NULL		0	NULL		0		0		0
Cbr3	19	6.90984	5.79984e-19	8.38531e-21	Drosha IP	#N/A	#N/A	#N/A	#N/A	0	#N/A	#N/A	#N/A	#N/A	0	#N/A	#N/A	#N/A	#N/A	0	0	#N/A	#N/A	#N/A	#N/A	0	0	#N/A	#N/A	#N/A	#N/A	0	0		0	NULL		0	NULL		1	Cbr3		0		0		0
Cbs	#N/A	#N/A	#N/A	#N/A	0	#N/A	#N/A	#N/A	#N/A	0	#N/A	#N/A	#N/A	#N/A	0	5	-0.289279	0.998278	0.996153	0	0	#N/A	#N/A	#N/A	#N/A	0	0	#N/A	#N/A	#N/A	#N/A	0	0		0	NULL		0	NULL		0	NULL		0		0		0
Cbx3	2	2.38304	0.000886401	0.000399414	0	2	-5.65318	0.00389548	0.00030451	0	2	-4.46393	0.0056175	0.00057058	0	2	-0.383891	0.60258	0.294312	0	0	#N/A	#N/A	#N/A	#N/A	0	0	#N/A	#N/A	#N/A	#N/A	0	0		0	NULL		0	NULL		0	NULL		0		0		0
Cbx5	#N/A	#N/A	#N/A	#N/A	0	#N/A	#N/A	#N/A	#N/A	0	#N/A	#N/A	#N/A	#N/A	0	2	-0.0117488	0.795884	0.589556	0	0	#N/A	#N/A	#N/A	#N/A	0	0	#N/A	#N/A	#N/A	#N/A	0	0		0	NULL		0	NULL		0	NULL		0		0		0
Cbx8	#N/A	#N/A	#N/A	#N/A	0	#N/A	#N/A	#N/A	#N/A	0	#N/A	#N/A	#N/A	#N/A	0	#N/A	#N/A	#N/A	#N/A	0	0	2	1.06816	0.0811304	0.00722315	0	0	#N/A	#N/A	#N/A	#N/A	0	0		0	NULL		0	NULL		0	NULL		0		0		0
Ccar1	9	5.58713	1.00411e-11	6.7747e-13	Drosha IP	#N/A	#N/A	#N/A	#N/A	0	#N/A	#N/A	#N/A	#N/A	0	15	0.0932028	0.788419	0.579174	0	0	16	-0.188412	0.706328	0.526626	0	0	#N/A	#N/A	#N/A	#N/A	0	0		0	NULL		0	NULL		1	Ccar1		0		0		0
Ccar2	2	5.69507	1.00411e-11	6.70695e-13	0	#N/A	#N/A	#N/A	#N/A	0	#N/A	#N/A	#N/A	#N/A	0	19	-0.0100129	0.836658	0.655731	0	0	18	0.0195497	0.692783	0.510476	0	0	#N/A	#N/A	#N/A	#N/A	0	0		0	NULL		0	NULL		0	NULL		0		0		0
Ccdc12	4	6.40364	5.85663e-14	2.04629e-15	Drosha IP	#N/A	#N/A	#N/A	#N/A	0	#N/A	#N/A	#N/A	#N/A	0	#N/A	#N/A	#N/A	#N/A	0	0	#N/A	#N/A	#N/A	#N/A	0	0	#N/A	#N/A	#N/A	#N/A	0	0		0	NULL		0	NULL		1	Ccdc12		0		0		0
Ccdc124	#N/A	#N/A	#N/A	#N/A	0	#N/A	#N/A	#N/A	#N/A	0	#N/A	#N/A	#N/A	#N/A	0	3	0.277498	0.363938	0.0743248	0	0	3	0.506476	0.66172	0.467481	0	0	#N/A	#N/A	#N/A	#N/A	0	0		0	NULL		0	NULL		0	NULL		0		0		0
Ccdc47	#N/A	#N/A	#N/A	#N/A	0	#N/A	#N/A	#N/A	#N/A	0	#N/A	#N/A	#N/A	#N/A	0	19	0.100442	0.565457	0.242279	0	0	19	0.0656976	0.469845	0.251831	0	0	#N/A	#N/A	#N/A	#N/A	0	0		0	NULL		0	NULL		0	NULL		0		0		0
Ccdc59	#N/A	#N/A	#N/A	#N/A	0	2	1.94383	0.145178	0.0863538	0	2	2.00167	0.116799	0.0584699	0	#N/A	#N/A	#N/A	#N/A	0	0	#N/A	#N/A	#N/A	#N/A	0	0	#N/A	#N/A	#N/A	#N/A	0	0		0	NULL		0	NULL		0	NULL		0		0		0
Ccdc88a	5	2.60406	0.00208789	0.00121248	0	#N/A	#N/A	#N/A	#N/A	0	#N/A	#N/A	#N/A	#N/A	0	#N/A	#N/A	#N/A	#N/A	0	0	#N/A	#N/A	#N/A	#N/A	0	0	#N/A	#N/A	#N/A	#N/A	0	0		0	NULL		0	NULL		0	NULL		0		0		0
Ccdc9	3	3.68187	5.31183e-10	4.99184e-11	0	#N/A	#N/A	#N/A	#N/A	0	#N/A	#N/A	#N/A	#N/A	0	#N/A	#N/A	#N/A	#N/A	0	0	#N/A	#N/A	#N/A	#N/A	0	0	#N/A	#N/A	#N/A	#N/A	0	0		0	NULL		0	NULL		0	NULL		0		0		0
Cct2	#N/A	#N/A	#N/A	#N/A	0	10	-2.74145	0.00588684	0.000669809	0	10	-0.720022	0.376237	0.256905	0	#N/A	#N/A	#N/A	#N/A	0	0	#N/A	#N/A	#N/A	#N/A	0	0	#N/A	#N/A	#N/A	#N/A	0	0		0	NULL		0	NULL		0	NULL		0		0		0
Cct3	#N/A	#N/A	#N/A	#N/A	0	9	-1.6546	0.0162754	0.00389665	0	9	-0.922399	0.221001	0.128539	0	26	-0.0194606	0.887854	0.741664	0	0	28	0.265518	0.176565	0.043261	0	0	#N/A	#N/A	#N/A	#N/A	0	0		0	NULL		0	NULL		0	NULL		0		0		0
Cct4	#N/A	#N/A	#N/A	#N/A	0	4	-1.35477	0.0405861	0.0152136	0	4	0.708321	0.565704	0.449416	0	22	0.0975817	0.508471	0.17358	0	0	19	0.365083	0.162263	0.035596	0	0	#N/A	#N/A	#N/A	#N/A	0	0		0	NULL		0	NULL		0	NULL		0		0		0
Cct5	#N/A	#N/A	#N/A	#N/A	0	6	-0.395119	0.330246	0.243866	0	6	1.29298	0.32005	0.206808	0	16	0.249158	0.560159	0.231221	0	0	16	0.444842	0.113076	0.0155011	0	0	#N/A	#N/A	#N/A	#N/A	0	0		0	NULL		0	NULL		0	NULL		0		0		0
Cct6a	2	3.82207	3.48462e-05	8.60659e-06	0	9	-0.583521	0.18689	0.119095	0	9	0.930658	0.473458	0.355324	0	17	0.229471	0.574778	0.260504	0	0	22	0.497948	0.106641	0.0130643	0	0	#N/A	#N/A	#N/A	#N/A	0	0		0	NULL		0	NULL		0	NULL		0		0		0
Cct7	#N/A	#N/A	#N/A	#N/A	0	6	-3.52779	0.0552957	0.0232015	0	6	0.0470664	0.7625	0.668538	0	12	0.155162	0.60258	0.297589	0	0	15	0.555231	0.156899	0.0320238	0	0	#N/A	#N/A	#N/A	#N/A	0	0		0	NULL		0	NULL		0	NULL		0		0		0
Cct8	#N/A	#N/A	#N/A	#N/A	0	5	-1.58404	0.0142637	0.00310862	0	5	0.446943	0.93048	0.884147	0	16	0.0111445	0.979348	0.937644	0	0	25	0.491781	0.151206	0.0294011	0	0	#N/A	#N/A	#N/A	#N/A	0	0		0	NULL		0	NULL		0	NULL		0		0		0
Cd2bp2	3	4.02561	7.03771e-08	9.41188e-09	0	#N/A	#N/A	#N/A	#N/A	0	#N/A	#N/A	#N/A	#N/A	0	#N/A	#N/A	#N/A	#N/A	0	0	#N/A	#N/A	#N/A	#N/A	0	0	#N/A	#N/A	#N/A	#N/A	0	0		0	NULL		0	NULL		0	NULL		0		0		0
Cdc16	#N/A	#N/A	#N/A	#N/A	0	#N/A	#N/A	#N/A	#N/A	0	#N/A	#N/A	#N/A	#N/A	0	2	0.0988154	0.937518	0.841024	0	0	2	-0.0212717	0.967868	0.943217	0	0	#N/A	#N/A	#N/A	#N/A	0	0		0	NULL		0	NULL		0	NULL		0		0		0
Cdc23	#N/A	#N/A	#N/A	#N/A	0	#N/A	#N/A	#N/A	#N/A	0	#N/A	#N/A	#N/A	#N/A	0	3	0.0669423	0.927844	0.818531	0	0	#N/A	#N/A	#N/A	#N/A	0	0	#N/A	#N/A	#N/A	#N/A	0	0		0	NULL		0	NULL		0	NULL		0		0		0
Cdc40	3	5.88321	4.0151e-12	2.46711e-13	0	#N/A	#N/A	#N/A	#N/A	0	#N/A	#N/A	#N/A	#N/A	0	#N/A	#N/A	#N/A	#N/A	0	0	#N/A	#N/A	#N/A	#N/A	0	0	#N/A	#N/A	#N/A	#N/A	0	0		0	NULL		0	NULL		0	NULL		0		0		0
Cdc42bpb	2	2.07707	0.00632229	0.00485712	0	#N/A	#N/A	#N/A	#N/A	0	#N/A	#N/A	#N/A	#N/A	0	#N/A	#N/A	#N/A	#N/A	0	0	#N/A	#N/A	#N/A	#N/A	0	0	#N/A	#N/A	#N/A	#N/A	0	0		0	NULL		0	NULL		0	NULL		0		0		0
Cdc42ep1	2	3.12964	0.000670165	0.000283407	0	#N/A	#N/A	#N/A	#N/A	0	#N/A	#N/A	#N/A	#N/A	0	4	0.328572	0.584944	0.278565	0	0	5	0.335939	0.566547	0.357119	0	0	#N/A	#N/A	#N/A	#N/A	0	0		0	NULL		0	NULL		0	NULL		0		0		0
Cdc5l	19	5.05797	1.53024e-12	8.11213e-14	Drosha IP	10	2.45726	0.0110123	0.00195878	PD 3' UTR (vs AR RNA)	10	3.75998	0.00364138	0.000228732	PD 5' UTR (vs AR RNA)	29	-0.077287	0.997878	0.985194	0	0	22	-0.0724563	0.707055	0.52878	0	0	25	0.488681	0.109582	0.0123871	0	0		1	NULL		1	Cdc5l		1	Cdc5l		0		0		0
Cdh11	4	2.99459	0.000191344	6.38582e-05	0	#N/A	#N/A	#N/A	#N/A	0	#N/A	#N/A	#N/A	#N/A	0	#N/A	#N/A	#N/A	#N/A	0	0	#N/A	#N/A	#N/A	#N/A	0	0	#N/A	#N/A	#N/A	#N/A	0	0		0	NULL		0	NULL		0	NULL		0		0		0
Cdh13	2	1.64557	0.0459901	0.043275	0	#N/A	#N/A	#N/A	#N/A	0	#N/A	#N/A	#N/A	#N/A	0	#N/A	#N/A	#N/A	#N/A	0	0	#N/A	#N/A	#N/A	#N/A	0	0	#N/A	#N/A	#N/A	#N/A	0	0		0	NULL		0	NULL		0	NULL		0		0		0
Cdh2	3	5.37405	3.71549e-12	2.14872e-13	0	#N/A	#N/A	#N/A	#N/A	0	#N/A	#N/A	#N/A	#N/A	0	#N/A	#N/A	#N/A	#N/A	0	0	#N/A	#N/A	#N/A	#N/A	0	0	#N/A	#N/A	#N/A	#N/A	0	0		0	NULL		0	NULL		0	NULL		0		0		0
Cdh20	3	5.02741	1.87873e-10	1.58447e-11	0	#N/A	#N/A	#N/A	#N/A	0	#N/A	#N/A	#N/A	#N/A	0	#N/A	#N/A	#N/A	#N/A	0	0	#N/A	#N/A	#N/A	#N/A	0	0	#N/A	#N/A	#N/A	#N/A	0	0		0	NULL		0	NULL		0	NULL		0		0		0
Cdh4	2	5.9535	7.20946e-12	4.69049e-13	0	#N/A	#N/A	#N/A	#N/A	0	#N/A	#N/A	#N/A	#N/A	0	#N/A	#N/A	#N/A	#N/A	0	0	#N/A	#N/A	#N/A	#N/A	0	0	#N/A	#N/A	#N/A	#N/A	0	0		0	NULL		0	NULL		0	NULL		0		0		0
Cdh6	7	5.47694	2.85452e-10	2.5106e-11	Drosha IP	#N/A	#N/A	#N/A	#N/A	0	#N/A	#N/A	#N/A	#N/A	0	#N/A	#N/A	#N/A	#N/A	0	0	#N/A	#N/A	#N/A	#N/A	0	0	#N/A	#N/A	#N/A	#N/A	0	0		0	NULL		0	NULL		1	Cdh6		0		0		0
Cdk1	#N/A	#N/A	#N/A	#N/A	0	#N/A	#N/A	#N/A	#N/A	0	#N/A	#N/A	#N/A	#N/A	0	#N/A	#N/A	#N/A	#N/A	0	0	4	0.0863295	0.382671	0.168168	0	0	#N/A	#N/A	#N/A	#N/A	0	0		0	NULL		0	NULL		0	NULL		0		0		0
Cdk11b	#N/A	#N/A	#N/A	#N/A	0	#N/A	#N/A	#N/A	#N/A	0	#N/A	#N/A	#N/A	#N/A	0	5	0.759369	0.209449	0.0170082	0	0	2	0.315243	0.113076	0.0160132	0	0	#N/A	#N/A	#N/A	#N/A	0	0		0	NULL		0	NULL		0	NULL		0		0		0
Cdk5rap3	#N/A	#N/A	#N/A	#N/A	0	#N/A	#N/A	#N/A	#N/A	0	#N/A	#N/A	#N/A	#N/A	0	#N/A	#N/A	#N/A	#N/A	0	0	2	0.37857	0.138777	0.025049	0	0	#N/A	#N/A	#N/A	#N/A	0	0		0	NULL		0	NULL		0	NULL		0		0		0
Cdk9	#N/A	#N/A	#N/A	#N/A	0	#N/A	#N/A	#N/A	#N/A	0	#N/A	#N/A	#N/A	#N/A	0	2	-0.0895984	0.924293	0.810717	0	0	#N/A	#N/A	#N/A	#N/A	0	0	#N/A	#N/A	#N/A	#N/A	0	0		0	NULL		0	NULL		0	NULL		0		0		0
Cdkn2a	#N/A	#N/A	#N/A	#N/A	0	#N/A	#N/A	#N/A	#N/A	0	#N/A	#N/A	#N/A	#N/A	0	2	0.784707	0.957949	0.882746	0	0	#N/A	#N/A	#N/A	#N/A	0	0	#N/A	#N/A	#N/A	#N/A	0	0		0	NULL		0	NULL		0	NULL		0		0		0
Cdkn2aip	3	3.3793	2.31705e-05	5.38783e-06	0	#N/A	#N/A	#N/A	#N/A	0	#N/A	#N/A	#N/A	#N/A	0	7	0.0972789	0.659272	0.372	0	0	5	0.0761952	0.862228	0.742474	0	0	#N/A	#N/A	#N/A	#N/A	0	0		0	NULL		0	NULL		0	NULL		0		0		0
Cdv3	#N/A	#N/A	#N/A	#N/A	0	2	3.90905	0.409584	0.31796	0	2	2.19254	0.825565	0.751693	0	#N/A	#N/A	#N/A	#N/A	0	0	#N/A	#N/A	#N/A	#N/A	0	0	#N/A	#N/A	#N/A	#N/A	0	0		0	NULL		0	NULL		0	NULL		0		0		0
Celf1	#N/A	#N/A	#N/A	#N/A	0	#N/A	#N/A	#N/A	#N/A	0	#N/A	#N/A	#N/A	#N/A	0	7	-0.0300983	0.942554	0.852204	0	0	8	-0.13188	0.316496	0.124885	0	0	#N/A	#N/A	#N/A	#N/A	0	0		0	NULL		0	NULL		0	NULL		0		0		0
Celf2	#N/A	#N/A	#N/A	#N/A	0	#N/A	#N/A	#N/A	#N/A	0	#N/A	#N/A	#N/A	#N/A	0	#N/A	#N/A	#N/A	#N/A	0	0	3	-0.092183	0.933905	0.87537	0	0	#N/A	#N/A	#N/A	#N/A	0	0		0	NULL		0	NULL		0	NULL		0		0		0
Cenpv	5	2.78462	0.00139215	0.000726265	0	#N/A	#N/A	#N/A	#N/A	0	#N/A	#N/A	#N/A	#N/A	0	12	-0.065852	0.875617	0.724606	0	0	10	-0.27185	0.743721	0.578909	0	0	#N/A	#N/A	#N/A	#N/A	0	0		0	NULL		0	NULL		0	NULL		0		0		0
Cep131	6	3.26504	4.81883e-05	1.27147e-05	Drosha IP	#N/A	#N/A	#N/A	#N/A	0	#N/A	#N/A	#N/A	#N/A	0	#N/A	#N/A	#N/A	#N/A	0	0	#N/A	#N/A	#N/A	#N/A	0	0	#N/A	#N/A	#N/A	#N/A	0	0		0	NULL		0	NULL		1	Cep131		0		0		0
Cep170	2	4.54508	4.68713e-08	5.98598e-09	0	#N/A	#N/A	#N/A	#N/A	0	#N/A	#N/A	#N/A	#N/A	0	3	0.313448	0.967044	0.912683	0	0	4	-0.562513	0.0489805	0.00311543	0	0	#N/A	#N/A	#N/A	#N/A	0	0		0	NULL		0	NULL		0	NULL		0		0		0
Cfl1	10	2.33142	0.00447858	0.00318896	0	12	-2.38467	0.0944087	0.0491249	0	12	-0.425767	0.827598	0.754545	0	#N/A	#N/A	#N/A	#N/A	0	0	#N/A	#N/A	#N/A	#N/A	0	0	#N/A	#N/A	#N/A	#N/A	0	0		0	NULL		0	NULL		0	NULL		0		0		0
Cfl2	4	2.69274	0.00447244	0.00317921	0	#N/A	#N/A	#N/A	#N/A	0	#N/A	#N/A	#N/A	#N/A	0	#N/A	#N/A	#N/A	#N/A	0	0	#N/A	#N/A	#N/A	#N/A	0	0	#N/A	#N/A	#N/A	#N/A	0	0		0	NULL		0	NULL		0	NULL		0		0		0
Chchd3	17	2.17279	0.00640641	0.00495532	0	#N/A	#N/A	#N/A	#N/A	0	#N/A	#N/A	#N/A	#N/A	0	12	-0.0465477	0.769554	0.551632	0	0	12	0.515048	0.16077	0.0337476	0	0	#N/A	#N/A	#N/A	#N/A	0	0		0	NULL		0	NULL		0	NULL		0		0		0
Chd4	6	3.42953	3.22936e-05	7.93723e-06	Drosha IP	6	0.362502	0.484407	0.389152	0	6	1.26836	0.0972139	0.0451392	PD 5' UTR (vs AR RNA)	44	0.049562	0.963185	0.895509	0	0	32	-0.0176164	0.96759	0.940321	0	0	37	0.11354	0.553715	0.31459	0	0		0	NULL		1	Chd4		1	Chd4		0		0		0
Chd6	#N/A	#N/A	#N/A	#N/A	0	#N/A	#N/A	#N/A	#N/A	0	#N/A	#N/A	#N/A	#N/A	0	3	0.646427	0.532582	0.192904	0	0	2	-0.121642	0.629022	0.43224	0	0	#N/A	#N/A	#N/A	#N/A	0	0		0	NULL		0	NULL		0	NULL		0		0		0
Cherp	10	5.59185	3.5341e-12	2.00124e-13	Drosha IP	#N/A	#N/A	#N/A	#N/A	0	#N/A	#N/A	#N/A	#N/A	0	4	0.542009	0.334065	0.053109	0	0	#N/A	#N/A	#N/A	#N/A	0	0	#N/A	#N/A	#N/A	#N/A	0	0		0	NULL		0	NULL		1	Cherp		0		0		0
Chmp4b	#N/A	#N/A	#N/A	#N/A	0	#N/A	#N/A	#N/A	#N/A	0	#N/A	#N/A	#N/A	#N/A	0	#N/A	#N/A	#N/A	#N/A	0	0	3	0.562625	0.113076	0.016195	0	0	#N/A	#N/A	#N/A	#N/A	0	0		0	NULL		0	NULL		0	NULL		0		0		0
Chst2	2	3.68822	5.75993e-05	1.56837e-05	0	#N/A	#N/A	#N/A	#N/A	0	#N/A	#N/A	#N/A	#N/A	0	11	0.117948	0.737929	0.491254	0	0	9	-0.235093	0.402276	0.188672	0	0	#N/A	#N/A	#N/A	#N/A	0	0		0	NULL		0	NULL		0	NULL		0		0		0
Chtf8	3	-1.11049	0.103295	0.0994372	0	#N/A	#N/A	#N/A	#N/A	0	#N/A	#N/A	#N/A	#N/A	0	#N/A	#N/A	#N/A	#N/A	0	0	2	0.665598	0.0469602	0.00277614	0	0	#N/A	#N/A	#N/A	#N/A	0	0		0	NULL		0	NULL		0	NULL		0		0		0
Chtop	5	5.5732	7.76629e-13	3.74279e-14	Drosha IP	#N/A	#N/A	#N/A	#N/A	0	#N/A	#N/A	#N/A	#N/A	0	9	0.41732	0.320485	0.0480664	0	0	9	-0.0765818	0.565412	0.35575	0	0	#N/A	#N/A	#N/A	#N/A	0	0		0	NULL		0	NULL		1	Chtop		0		0		0
Cirbp	5	2.01466	0.0201668	0.0183445	0	8	0.340183	0.720884	0.649034	0	8	0.607169	0.272444	0.167683	0	9	0.376957	0.356807	0.0660941	0	0	9	-0.249856	0.529127	0.310542	0	0	#N/A	#N/A	#N/A	#N/A	0	0		0	NULL		0	NULL		0	NULL		0		0		0
Ckap2	2	1.58143	0.0443814	0.0416008	0	#N/A	#N/A	#N/A	#N/A	0	#N/A	#N/A	#N/A	#N/A	0	2	-0.656461	0.565457	0.239933	0	0	#N/A	#N/A	#N/A	#N/A	0	0	#N/A	#N/A	#N/A	#N/A	0	0		0	NULL		0	NULL		0	NULL		0		0		0
Ckap4	4	2.71182	0.00130476	0.000663476	0	2	0.898381	0.415711	0.323721	0	2	3.65527	0.00561447	0.000545744	0	41	0.108886	0.559571	0.222571	0	0	41	0.179319	0.205094	0.0585774	0	0	#N/A	#N/A	#N/A	#N/A	0	0		0	NULL		0	NULL		0	NULL		0		0		0
Ckap5	5	2.1066	0.00632229	0.00485978	0	6	2.91127	0.00296531	0.000157767	PD 3' UTR (vs AR RNA)	6	2.81798	0.0054547	0.000463294	PD 5' UTR (vs AR RNA)	26	-0.276142	0.625691	0.332606	0	0	14	-0.135539	0.522241	0.303897	0	0	20	0.469059	0.26873	0.0760683	0	0		1	NULL		1	Ckap5		0	NULL		0		1	Ckap5	0
Ckb	11	-1.02572	0.293705	0.289458	0	22	-1.56741	0.0701172	0.032727	0	22	-0.914646	0.470629	0.350553	0	#N/A	#N/A	#N/A	#N/A	0	0	#N/A	#N/A	#N/A	#N/A	0	0	#N/A	#N/A	#N/A	#N/A	0	0		0	NULL		0	NULL		0	NULL		0		0		0
Clasp1	6	2.61911	0.00121543	0.00059014	0	#N/A	#N/A	#N/A	#N/A	0	#N/A	#N/A	#N/A	#N/A	0	14	0.240432	0.607648	0.303608	0	0	6	-0.158288	0.530671	0.314903	0	0	#N/A	#N/A	#N/A	#N/A	0	0		0	NULL		0	NULL		0	NULL		0		0		0
Clasp2	14	2.09957	0.00590899	0.00449937	0	#N/A	#N/A	#N/A	#N/A	0	#N/A	#N/A	#N/A	#N/A	0	26	-0.0355238	0.917253	0.796167	0	0	24	-0.064747	0.848533	0.725242	0	0	#N/A	#N/A	#N/A	#N/A	0	0		0	NULL		0	NULL		0	NULL		0		0		0
Clic1	#N/A	#N/A	#N/A	#N/A	0	#N/A	#N/A	#N/A	#N/A	0	#N/A	#N/A	#N/A	#N/A	0	3	0.0239437	0.771438	0.5601	0	0	#N/A	#N/A	#N/A	#N/A	0	0	#N/A	#N/A	#N/A	#N/A	0	0		0	NULL		0	NULL		0	NULL		0		0		0
Clint1	4	5.90698	7.27947e-13	3.42048e-14	Drosha IP	#N/A	#N/A	#N/A	#N/A	0	#N/A	#N/A	#N/A	#N/A	0	#N/A	#N/A	#N/A	#N/A	0	0	#N/A	#N/A	#N/A	#N/A	0	0	#N/A	#N/A	#N/A	#N/A	0	0		0	NULL		0	NULL		1	Clint1		0		0		0
Clip2	5	1.86707	0.0102095	0.0085243	0	#N/A	#N/A	#N/A	#N/A	0	#N/A	#N/A	#N/A	#N/A	0	#N/A	#N/A	#N/A	#N/A	0	0	#N/A	#N/A	#N/A	#N/A	0	0	#N/A	#N/A	#N/A	#N/A	0	0		0	NULL		0	NULL		0	NULL		0		0		0
Clk3	#N/A	#N/A	#N/A	#N/A	0	#N/A	#N/A	#N/A	#N/A	0	#N/A	#N/A	#N/A	#N/A	0	#N/A	#N/A	#N/A	#N/A	0	0	2	-0.108535	0.784342	0.638607	0	0	#N/A	#N/A	#N/A	#N/A	0	0		0	NULL		0	NULL		0	NULL		0		0		0
Clptm1	#N/A	#N/A	#N/A	#N/A	0	#N/A	#N/A	#N/A	#N/A	0	#N/A	#N/A	#N/A	#N/A	0	7	0.11769	0.46839	0.144302	0	0	7	0.103244	0.359642	0.153181	0	0	#N/A	#N/A	#N/A	#N/A	0	0		0	NULL		0	NULL		0	NULL		0		0		0
Clta	#N/A	#N/A	#N/A	#N/A	0	3	-1.00312	0.0602591	0.0264499	0	3	-1.13626	0.303299	0.193368	0	#N/A	#N/A	#N/A	#N/A	0	0	#N/A	#N/A	#N/A	#N/A	0	0	#N/A	#N/A	#N/A	#N/A	0	0		0	NULL		0	NULL		0	NULL		0		0		0
Cltc	3	3.05046	9.15255e-05	2.6796e-05	0	19	-1.64883	0.0370174	0.013294	0	19	-0.747559	0.18021	0.09893	0	51	-0.241283	0.559571	0.216778	0	0	41	-0.218049	0.265447	0.0920745	0	0	#N/A	#N/A	#N/A	#N/A	0	0		0	NULL		0	NULL		0	NULL		0		0		0
Cnn3	#N/A	#N/A	#N/A	#N/A	0	#N/A	#N/A	#N/A	#N/A	0	#N/A	#N/A	#N/A	#N/A	0	14	-0.15661	0.848343	0.684009	0	0	9	-0.107288	0.490042	0.272943	0	0	#N/A	#N/A	#N/A	#N/A	0	0		0	NULL		0	NULL		0	NULL		0		0		0
Cnp	#N/A	#N/A	#N/A	#N/A	0	#N/A	#N/A	#N/A	#N/A	0	#N/A	#N/A	#N/A	#N/A	0	5	0.337043	0.320485	0.048448	0	0	5	0.238576	0.148209	0.0279739	0	0	#N/A	#N/A	#N/A	#N/A	0	0		0	NULL		0	NULL		0	NULL		0		0		0
Cobll1	4	2.50824	0.00301398	0.00194475	0	#N/A	#N/A	#N/A	#N/A	0	#N/A	#N/A	#N/A	#N/A	0	#N/A	#N/A	#N/A	#N/A	0	0	#N/A	#N/A	#N/A	#N/A	0	0	#N/A	#N/A	#N/A	#N/A	0	0		0	NULL		0	NULL		0	NULL		0		0		0
Colgalt1	6	-2.47292	0.00199927	0.00113934	0	#N/A	#N/A	#N/A	#N/A	0	#N/A	#N/A	#N/A	#N/A	0	2	-0.0251926	0.866803	0.714866	0	0	#N/A	#N/A	#N/A	#N/A	0	0	#N/A	#N/A	#N/A	#N/A	0	0		0	NULL		0	NULL		0	NULL		0		0		0
Copa	3	3.03066	0.000206986	6.95772e-05	0	3	-0.472111	0.430782	0.340146	0	3	-0.578429	0.172988	0.0941292	0	44	-0.0967585	0.531665	0.190205	0	0	37	-0.101692	0.441621	0.226143	0	0	#N/A	#N/A	#N/A	#N/A	0	0		0	NULL		0	NULL		0	NULL		0		0		0
Copb1	#N/A	#N/A	#N/A	#N/A	0	#N/A	#N/A	#N/A	#N/A	0	#N/A	#N/A	#N/A	#N/A	0	9	-0.209794	0.566329	0.250963	0	0	4	0.215211	0.968508	0.945744	0	0	#N/A	#N/A	#N/A	#N/A	0	0		0	NULL		0	NULL		0	NULL		0		0		0
Copb2	#N/A	#N/A	#N/A	#N/A	0	2	-0.251902	0.497392	0.401763	0	2	1.28786	0.248638	0.150927	0	3	-0.494447	0.349073	0.0602021	0	0	3	-0.209504	0.276399	0.0987549	0	0	#N/A	#N/A	#N/A	#N/A	0	0		0	NULL		0	NULL		0	NULL		0		0		0
Copg1	#N/A	#N/A	#N/A	#N/A	0	#N/A	#N/A	#N/A	#N/A	0	#N/A	#N/A	#N/A	#N/A	0	5	-0.465728	0.333838	0.0525991	0	0	3	-0.25212	0.507504	0.285923	0	0	#N/A	#N/A	#N/A	#N/A	0	0		0	NULL		0	NULL		0	NULL		0		0		0
Coro1b	13	1.55738	0.0241603	0.0221518	0	#N/A	#N/A	#N/A	#N/A	0	#N/A	#N/A	#N/A	#N/A	0	#N/A	#N/A	#N/A	#N/A	0	0	#N/A	#N/A	#N/A	#N/A	0	0	#N/A	#N/A	#N/A	#N/A	0	0		0	NULL		0	NULL		0	NULL		0		0		0
Coro1c	35	2.18785	0.00246975	0.0014997	0	#N/A	#N/A	#N/A	#N/A	0	#N/A	#N/A	#N/A	#N/A	0	5	0.1664	0.565457	0.245812	0	0	#N/A	#N/A	#N/A	#N/A	0	0	#N/A	#N/A	#N/A	#N/A	0	0		0	NULL		0	NULL		0	NULL		0		0		0
Coro2b	18	2.90155	0.000319353	0.000116583	0	#N/A	#N/A	#N/A	#N/A	0	#N/A	#N/A	#N/A	#N/A	0	#N/A	#N/A	#N/A	#N/A	0	0	#N/A	#N/A	#N/A	#N/A	0	0	#N/A	#N/A	#N/A	#N/A	0	0		0	NULL		0	NULL		0	NULL		0		0		0
Cotl1	#N/A	#N/A	#N/A	#N/A	0	#N/A	#N/A	#N/A	#N/A	0	#N/A	#N/A	#N/A	#N/A	0	3	-3.17642	0.39167	0.0886749	0	0	#N/A	#N/A	#N/A	#N/A	0	0	#N/A	#N/A	#N/A	#N/A	0	0		0	NULL		0	NULL		0	NULL		0		0		0
Cox4i1	#N/A	#N/A	#N/A	#N/A	0	#N/A	#N/A	#N/A	#N/A	0	#N/A	#N/A	#N/A	#N/A	0	8	0.222773	0.414894	0.102369	0	0	6	0.772994	0.168195	0.0393156	0	0	#N/A	#N/A	#N/A	#N/A	0	0		0	NULL		0	NULL		0	NULL		0		0		0
Cox5a	2	5.27092	1.50292e-09	1.52103e-10	0	#N/A	#N/A	#N/A	#N/A	0	#N/A	#N/A	#N/A	#N/A	0	6	0.230936	0.560159	0.233128	0	0	5	0.540011	0.103828	0.0124325	0	0	#N/A	#N/A	#N/A	#N/A	0	0		0	NULL		0	NULL		0	NULL		0		0		0
Cox5b	#N/A	#N/A	#N/A	#N/A	0	#N/A	#N/A	#N/A	#N/A	0	#N/A	#N/A	#N/A	#N/A	0	6	0.399933	0.394964	0.0902614	0	0	6	0.553021	0.142648	0.0260098	0	0	#N/A	#N/A	#N/A	#N/A	0	0		0	NULL		0	NULL		0	NULL		0		0		0
Cox6a1	#N/A	#N/A	#N/A	#N/A	0	#N/A	#N/A	#N/A	#N/A	0	#N/A	#N/A	#N/A	#N/A	0	2	-0.427198	0.967044	0.905267	0	0	2	0.0648989	0.903191	0.821085	0	0	#N/A	#N/A	#N/A	#N/A	0	0		0	NULL		0	NULL		0	NULL		0		0		0
Cox6b1	#N/A	#N/A	#N/A	#N/A	0	#N/A	#N/A	#N/A	#N/A	0	#N/A	#N/A	#N/A	#N/A	0	6	0.221444	0.848343	0.682259	0	0	5	0.0431542	0.562885	0.351602	0	0	#N/A	#N/A	#N/A	#N/A	0	0		0	NULL		0	NULL		0	NULL		0		0		0
Cox6c	2	2.91276	0.00130476	0.000664524	0	#N/A	#N/A	#N/A	#N/A	0	#N/A	#N/A	#N/A	#N/A	0	4	0.325962	0.209449	0.0191402	0	0	7	0.671305	0.134403	0.0235164	0	0	#N/A	#N/A	#N/A	#N/A	0	0		0	NULL		0	NULL		0	NULL		0		0		0
Cox7a2	#N/A	#N/A	#N/A	#N/A	0	#N/A	#N/A	#N/A	#N/A	0	#N/A	#N/A	#N/A	#N/A	0	2	0.301684	0.332531	0.0519211	0	0	3	0.582023	0.230047	0.0729137	0	0	#N/A	#N/A	#N/A	#N/A	0	0		0	NULL		0	NULL		0	NULL		0		0		0
Cox7c	#N/A	#N/A	#N/A	#N/A	0	#N/A	#N/A	#N/A	#N/A	0	#N/A	#N/A	#N/A	#N/A	0	3	0.507825	0.255118	0.0248057	0	0	4	0.47225	0.0832923	0.00789384	0	0	#N/A	#N/A	#N/A	#N/A	0	0		0	NULL		0	NULL		0	NULL		0		0		0
Cpeb2	#N/A	#N/A	#N/A	#N/A	0	2	-7.07128	0.00704636	0.00100541	0	2	-7.13615	0.00319841	0.000150832	0	#N/A	#N/A	#N/A	#N/A	0	0	#N/A	#N/A	#N/A	#N/A	0	0	#N/A	#N/A	#N/A	#N/A	0	0		0	NULL		0	NULL		0	NULL		0		0		0
Cpsf1	#N/A	#N/A	#N/A	#N/A	0	#N/A	#N/A	#N/A	#N/A	0	#N/A	#N/A	#N/A	#N/A	0	3	1.45935	0.0297772	0.000380405	0	0	#N/A	#N/A	#N/A	#N/A	0	0	#N/A	#N/A	#N/A	#N/A	0	0		0	NULL		0	NULL		0	NULL		0		0		0
Cpsf6	2	2.43349	0.000757282	0.000331197	0	2	-3.96554	0.00651026	0.000904416	0	2	-3.71061	0.00480549	0.000353268	0	5	0.466226	0.364671	0.075833	0	0	4	0.130553	0.517352	0.298104	0	0	#N/A	#N/A	#N/A	#N/A	0	0		0	NULL		0	NULL		0	NULL		0		0		0
Cpsf7	3	3.05435	0.000150479	4.87697e-05	0	#N/A	#N/A	#N/A	#N/A	0	#N/A	#N/A	#N/A	#N/A	0	#N/A	#N/A	#N/A	#N/A	0	0	3	0.10524	0.428817	0.214103	0	0	#N/A	#N/A	#N/A	#N/A	0	0		0	NULL		0	NULL		0	NULL		0		0		0
Cpt1a	#N/A	#N/A	#N/A	#N/A	0	#N/A	#N/A	#N/A	#N/A	0	#N/A	#N/A	#N/A	#N/A	0	6	-0.473855	0.354313	0.0634873	0	0	6	0.0501249	0.752346	0.596411	0	0	#N/A	#N/A	#N/A	#N/A	0	0		0	NULL		0	NULL		0	NULL		0		0		0
Crip2	2	2.01776	0.0276923	0.0256237	0	2	-1.52467	0.0582327	0.0245746	0	2	-0.555138	0.685553	0.591051	0	#N/A	#N/A	#N/A	#N/A	0	0	#N/A	#N/A	#N/A	#N/A	0	0	#N/A	#N/A	#N/A	#N/A	0	0		0	NULL		0	NULL		0	NULL		0		0		0
Crnkl1	5	4.21355	4.07231e-09	4.41575e-10	Drosha IP	#N/A	#N/A	#N/A	#N/A	0	#N/A	#N/A	#N/A	#N/A	0	2	0.520325	0.531665	0.18998	0	0	#N/A	#N/A	#N/A	#N/A	0	0	#N/A	#N/A	#N/A	#N/A	0	0		0	NULL		0	NULL		1	Crnkl1		0		0		0
Cs	#N/A	#N/A	#N/A	#N/A	0	3	-1.52585	0.0932169	0.0480174	0	3	0.0300767	0.810324	0.732917	0	21	0.234128	0.438517	0.124906	0	0	17	-0.866784	0.0459972	0.00262092	0	0	#N/A	#N/A	#N/A	#N/A	0	0		0	NULL		0	NULL		0	NULL		0		0		0
Csde1	6	3.63661	3.56431e-05	8.84635e-06	Drosha IP	17	0.126954	0.901688	0.877496	0	17	-1.64998	0.0196195	0.00495825	0	38	0.0150413	0.572065	0.255785	0	0	18	0.478342	0.115428	0.0173882	0	0	#N/A	#N/A	#N/A	#N/A	0	0		0	NULL		0	NULL		1	Csde1		0		0		0
Cse1l	#N/A	#N/A	#N/A	#N/A	0	4	-2.59537	0.0296424	0.00926146	0	4	-1.71523	0.105798	0.0509162	0	4	-0.217947	0.827143	0.626375	0	0	4	0.00778881	0.710244	0.533695	0	0	#N/A	#N/A	#N/A	#N/A	0	0		0	NULL		0	NULL		0	NULL		0		0		0
Csnk1d	#N/A	#N/A	#N/A	#N/A	0	2	2.25585	0.00500402	0.00054454	0	2	1.37677	0.029516	0.009119	0	9	-0.13569	0.574778	0.260052	0	0	4	0.0392689	0.983862	0.973259	0	0	#N/A	#N/A	#N/A	#N/A	0	0		0	NULL		0	NULL		0	NULL		0		0		0
Csnk2a1	#N/A	#N/A	#N/A	#N/A	0	#N/A	#N/A	#N/A	#N/A	0	#N/A	#N/A	#N/A	#N/A	0	11	-0.372153	0.288774	0.0360711	0	0	12	0.0313111	0.770533	0.613573	0	0	#N/A	#N/A	#N/A	#N/A	0	0		0	NULL		0	NULL		0	NULL		0		0		0
Csnk2a2	#N/A	#N/A	#N/A	#N/A	0	#N/A	#N/A	#N/A	#N/A	0	#N/A	#N/A	#N/A	#N/A	0	#N/A	#N/A	#N/A	#N/A	0	0	2	-0.118874	0.859403	0.73943	0	0	#N/A	#N/A	#N/A	#N/A	0	0		0	NULL		0	NULL		0	NULL		0		0		0
Cspg5	#N/A	#N/A	#N/A	#N/A	0	#N/A	#N/A	#N/A	#N/A	0	#N/A	#N/A	#N/A	#N/A	0	3	-0.0250729	0.782167	0.57203	0	0	2	0.393165	0.102952	0.0121724	0	0	#N/A	#N/A	#N/A	#N/A	0	0		0	NULL		0	NULL		0	NULL		0		0		0
Csrp1	2	2.44484	0.00420826	0.00291536	0	#N/A	#N/A	#N/A	#N/A	0	#N/A	#N/A	#N/A	#N/A	0	#N/A	#N/A	#N/A	#N/A	0	0	#N/A	#N/A	#N/A	#N/A	0	0	#N/A	#N/A	#N/A	#N/A	0	0		0	NULL		0	NULL		0	NULL		0		0		0
Ctbp1	#N/A	#N/A	#N/A	#N/A	0	#N/A	#N/A	#N/A	#N/A	0	#N/A	#N/A	#N/A	#N/A	0	7	-0.0708088	0.995273	0.973327	0	0	5	0.0923573	0.939546	0.889232	0	0	#N/A	#N/A	#N/A	#N/A	0	0		0	NULL		0	NULL		0	NULL		0		0		0
Ctbp2	#N/A	#N/A	#N/A	#N/A	0	#N/A	#N/A	#N/A	#N/A	0	#N/A	#N/A	#N/A	#N/A	0	#N/A	#N/A	#N/A	#N/A	0	0	3	-0.0601399	0.745524	0.585693	0	0	#N/A	#N/A	#N/A	#N/A	0	0		0	NULL		0	NULL		0	NULL		0		0		0
Ctc1	#N/A	#N/A	#N/A	#N/A	0	#N/A	#N/A	#N/A	#N/A	0	#N/A	#N/A	#N/A	#N/A	0	3	-0.737012	0.371326	0.0787982	0	0	#N/A	#N/A	#N/A	#N/A	0	0	#N/A	#N/A	#N/A	#N/A	0	0		0	NULL		0	NULL		0	NULL		0		0		0
Ctcf	#N/A	#N/A	#N/A	#N/A	0	#N/A	#N/A	#N/A	#N/A	0	#N/A	#N/A	#N/A	#N/A	0	15	0.45195	0.305996	0.0416971	0	0	11	0.254317	0.371542	0.160367	0	0	#N/A	#N/A	#N/A	#N/A	0	0		0	NULL		0	NULL		0	NULL		0		0		0
Ctnna1	22	6.87791	1.1886e-15	2.43449e-17	Drosha IP	#N/A	#N/A	#N/A	#N/A	0	#N/A	#N/A	#N/A	#N/A	0	6	-0.551058	0.491488	0.156621	0	0	5	0.0202539	0.962444	0.931597	0	0	#N/A	#N/A	#N/A	#N/A	0	0		0	NULL		0	NULL		1	Ctnna1		0		0		0
Ctnnb1	10	5.26029	1.07995e-11	7.41655e-13	Drosha IP	#N/A	#N/A	#N/A	#N/A	0	#N/A	#N/A	#N/A	#N/A	0	6	-0.143125	0.767863	0.545515	0	0	3	-0.209352	0.258681	0.0884379	0	0	#N/A	#N/A	#N/A	#N/A	0	0		0	NULL		0	NULL		1	Ctnnb1		0		0		0
Ctnnd1	9	3.30914	6.20297e-05	1.71142e-05	Drosha IP	#N/A	#N/A	#N/A	#N/A	0	#N/A	#N/A	#N/A	#N/A	0	11	0.381284	0.359818	0.068938	0	0	9	0.239407	0.897564	0.80956	0	0	#N/A	#N/A	#N/A	#N/A	0	0		0	NULL		0	NULL		1	Ctnnd1		0		0		0
Ctnnd2	25	3.52253	2.19399e-05	5.04883e-06	Drosha IP	#N/A	#N/A	#N/A	#N/A	0	#N/A	#N/A	#N/A	#N/A	0	2	-1.01131	0.552301	0.206966	0	0	2	0.453918	0.465358	0.247472	0	0	#N/A	#N/A	#N/A	#N/A	0	0		0	NULL		0	NULL		1	Ctnnd2		0		0		0
Ctsd	#N/A	#N/A	#N/A	#N/A	0	3	-1.58496	0.0322546	0.0108932	0	3	-0.784074	0.371687	0.252009	0	4	-0.468016	0.929591	0.820732	0	0	2	-0.690203	0.253636	0.0848081	0	0	#N/A	#N/A	#N/A	#N/A	0	0		0	NULL		0	NULL		0	NULL		0		0		0
Cttn	22	1.82621	0.0129738	0.0112544	0	#N/A	#N/A	#N/A	#N/A	0	#N/A	#N/A	#N/A	#N/A	0	#N/A	#N/A	#N/A	#N/A	0	0	#N/A	#N/A	#N/A	#N/A	0	0	#N/A	#N/A	#N/A	#N/A	0	0		0	NULL		0	NULL		0	NULL		0		0		0
Cttnbp2nl	10	1.8991	0.00991632	0.00826193	0	#N/A	#N/A	#N/A	#N/A	0	#N/A	#N/A	#N/A	#N/A	0	#N/A	#N/A	#N/A	#N/A	0	0	#N/A	#N/A	#N/A	#N/A	0	0	#N/A	#N/A	#N/A	#N/A	0	0		0	NULL		0	NULL		0	NULL		0		0		0
Cuedc1	2	2.07689	0.0146134	0.0129055	0	#N/A	#N/A	#N/A	#N/A	0	#N/A	#N/A	#N/A	#N/A	0	#N/A	#N/A	#N/A	#N/A	0	0	#N/A	#N/A	#N/A	#N/A	0	0	#N/A	#N/A	#N/A	#N/A	0	0		0	NULL		0	NULL		0	NULL		0		0		0
Cux1	4	5.64483	6.28522e-13	2.87757e-14	Drosha IP	#N/A	#N/A	#N/A	#N/A	0	#N/A	#N/A	#N/A	#N/A	0	#N/A	#N/A	#N/A	#N/A	0	0	#N/A	#N/A	#N/A	#N/A	0	0	#N/A	#N/A	#N/A	#N/A	0	0		0	NULL		0	NULL		1	Cux1		0		0		0
Cwc15	5	5.85013	9.58294e-14	3.57917e-15	Drosha IP	#N/A	#N/A	#N/A	#N/A	0	#N/A	#N/A	#N/A	#N/A	0	#N/A	#N/A	#N/A	#N/A	0	0	#N/A	#N/A	#N/A	#N/A	0	0	#N/A	#N/A	#N/A	#N/A	0	0		0	NULL		0	NULL		1	Cwc15		0		0		0
Cwc22	12	5.27164	9.69669e-11	7.71062e-12	Drosha IP	#N/A	#N/A	#N/A	#N/A	0	#N/A	#N/A	#N/A	#N/A	0	#N/A	#N/A	#N/A	#N/A	0	0	#N/A	#N/A	#N/A	#N/A	0	0	#N/A	#N/A	#N/A	#N/A	0	0		0	NULL		0	NULL		1	Cwc22		0		0		0
Cwc27	17	4.01944	1.68621e-06	2.88485e-07	Drosha IP	#N/A	#N/A	#N/A	#N/A	0	#N/A	#N/A	#N/A	#N/A	0	#N/A	#N/A	#N/A	#N/A	0	0	#N/A	#N/A	#N/A	#N/A	0	0	#N/A	#N/A	#N/A	#N/A	0	0		0	NULL		0	NULL		1	Cwc27		0		0		0
Cyb5r3	#N/A	#N/A	#N/A	#N/A	0	#N/A	#N/A	#N/A	#N/A	0	#N/A	#N/A	#N/A	#N/A	0	11	-0.140959	0.967044	0.909422	0	0	7	0.134895	0.474394	0.255443	0	0	#N/A	#N/A	#N/A	#N/A	0	0		0	NULL		0	NULL		0	NULL		0		0		0
Cybrd1	2	1.92998	0.0139798	0.0122787	0	#N/A	#N/A	#N/A	#N/A	0	#N/A	#N/A	#N/A	#N/A	0	#N/A	#N/A	#N/A	#N/A	0	0	#N/A	#N/A	#N/A	#N/A	0	0	#N/A	#N/A	#N/A	#N/A	0	0		0	NULL		0	NULL		0	NULL		0		0		0
Cyc1	#N/A	#N/A	#N/A	#N/A	0	#N/A	#N/A	#N/A	#N/A	0	#N/A	#N/A	#N/A	#N/A	0	8	0.113952	0.671028	0.388615	0	0	10	0.539631	0.19513	0.0537858	0	0	#N/A	#N/A	#N/A	#N/A	0	0		0	NULL		0	NULL		0	NULL		0		0		0
Cyfip1	#N/A	#N/A	#N/A	#N/A	0	#N/A	#N/A	#N/A	#N/A	0	#N/A	#N/A	#N/A	#N/A	0	6	-0.272431	0.71685	0.445169	0	0	7	-0.0802853	0.933905	0.874478	0	0	#N/A	#N/A	#N/A	#N/A	0	0		0	NULL		0	NULL		0	NULL		0		0		0
Cyp20a1	#N/A	#N/A	#N/A	#N/A	0	#N/A	#N/A	#N/A	#N/A	0	#N/A	#N/A	#N/A	#N/A	0	3	0.376287	0.625124	0.331862	0	0	#N/A	#N/A	#N/A	#N/A	0	0	#N/A	#N/A	#N/A	#N/A	0	0		0	NULL		0	NULL		0	NULL		0		0		0
Cyp51a1	#N/A	#N/A	#N/A	#N/A	0	#N/A	#N/A	#N/A	#N/A	0	#N/A	#N/A	#N/A	#N/A	0	7	-0.238964	0.649744	0.357523	0	0	#N/A	#N/A	#N/A	#N/A	0	0	#N/A	#N/A	#N/A	#N/A	0	0		0	NULL		0	NULL		0	NULL		0		0		0
D8Ertd738e	3	0.354192	0.471283	0.467309	0	#N/A	#N/A	#N/A	#N/A	0	#N/A	#N/A	#N/A	#N/A	0	5	1.44264	0.242368	0.0232219	0	0	6	0.607391	0.0329414	0.0014801	0	0	#N/A	#N/A	#N/A	#N/A	0	0		0	NULL		0	NULL		0	NULL		0		0		0
Dad1	#N/A	#N/A	#N/A	#N/A	0	#N/A	#N/A	#N/A	#N/A	0	#N/A	#N/A	#N/A	#N/A	0	2	1.74012	0.0913109	0.00220339	0	0	2	0.217535	0.877844	0.772177	0	0	#N/A	#N/A	#N/A	#N/A	0	0		0	NULL		0	NULL		0	NULL		0		0		0
Dap3	#N/A	#N/A	#N/A	#N/A	0	#N/A	#N/A	#N/A	#N/A	0	#N/A	#N/A	#N/A	#N/A	0	4	0.332785	0.581652	0.267915	0	0	5	0.0249559	0.949794	0.909881	0	0	#N/A	#N/A	#N/A	#N/A	0	0		0	NULL		0	NULL		0	NULL		0		0		0
Dars	#N/A	#N/A	#N/A	#N/A	0	10	0.196661	0.42699	0.336635	0	10	-0.663761	0.999476	0.998144	0	25	-0.982027	0.0861616	0.00159165	0	0	22	-1.1888	0.0124916	0.000355885	0	0	#N/A	#N/A	#N/A	#N/A	0	0		0	NULL		0	NULL		0	NULL		0		0		0
Dazap1	#N/A	#N/A	#N/A	#N/A	0	10	0.753372	0.474083	0.379495	0	10	0.078086	0.972609	0.964377	0	11	-0.377182	0.365639	0.0766583	0	0	7	-0.0168995	0.625582	0.426969	0	0	#N/A	#N/A	#N/A	#N/A	0	0		0	NULL		0	NULL		0	NULL		0		0		0
Dbi	#N/A	#N/A	#N/A	#N/A	0	3	-1.03892	0.161223	0.0996191	0	3	-0.686663	0.415464	0.296904	0	#N/A	#N/A	#N/A	#N/A	0	0	#N/A	#N/A	#N/A	#N/A	0	0	#N/A	#N/A	#N/A	#N/A	0	0		0	NULL		0	NULL		0	NULL		0		0		0
Dbn1	34	1.78065	0.0237755	0.0217131	0	#N/A	#N/A	#N/A	#N/A	0	#N/A	#N/A	#N/A	#N/A	0	#N/A	#N/A	#N/A	#N/A	0	0	#N/A	#N/A	#N/A	#N/A	0	0	#N/A	#N/A	#N/A	#N/A	0	0		0	NULL		0	NULL		0	NULL		0		0		0
Dbnl	4	2.04881	0.00908628	0.00745076	0	#N/A	#N/A	#N/A	#N/A	0	#N/A	#N/A	#N/A	#N/A	0	#N/A	#N/A	#N/A	#N/A	0	0	#N/A	#N/A	#N/A	#N/A	0	0	#N/A	#N/A	#N/A	#N/A	0	0		0	NULL		0	NULL		0	NULL		0		0		0
Dbt	#N/A	#N/A	#N/A	#N/A	0	#N/A	#N/A	#N/A	#N/A	0	#N/A	#N/A	#N/A	#N/A	0	4	0.107908	0.532582	0.193529	0	0	5	0.431823	0.12273	0.0199306	0	0	#N/A	#N/A	#N/A	#N/A	0	0		0	NULL		0	NULL		0	NULL		0		0		0
Dcaf13	#N/A	#N/A	#N/A	#N/A	0	3	1.78998	0.0739057	0.0354308	0	3	2.62171	0.0188029	0.00467208	0	#N/A	#N/A	#N/A	#N/A	0	0	#N/A	#N/A	#N/A	#N/A	0	0	#N/A	#N/A	#N/A	#N/A	0	0		0	NULL		0	NULL		0	NULL		0		0		0
Dcakd	#N/A	#N/A	#N/A	#N/A	0	#N/A	#N/A	#N/A	#N/A	0	#N/A	#N/A	#N/A	#N/A	0	10	-0.111667	0.574778	0.26067	0	0	9	0.172756	0.510944	0.289064	0	0	#N/A	#N/A	#N/A	#N/A	0	0		0	NULL		0	NULL		0	NULL		0		0		0
Dclk1	2	1.9723	0.0144185	0.012716	0	#N/A	#N/A	#N/A	#N/A	0	#N/A	#N/A	#N/A	#N/A	0	6	0.276627	0.635419	0.344158	0	0	2	-0.0360437	0.999064	0.999064	0	0	#N/A	#N/A	#N/A	#N/A	0	0		0	NULL		0	NULL		0	NULL		0		0		0
Dclk2	6	2.44585	0.00276932	0.00175168	0	#N/A	#N/A	#N/A	#N/A	0	#N/A	#N/A	#N/A	#N/A	0	24	0.238175	0.560159	0.232474	0	0	13	0.11643	0.383819	0.173497	0	0	#N/A	#N/A	#N/A	#N/A	0	0		0	NULL		0	NULL		0	NULL		0		0		0
Dctn1	#N/A	#N/A	#N/A	#N/A	0	#N/A	#N/A	#N/A	#N/A	0	#N/A	#N/A	#N/A	#N/A	0	9	-0.230478	0.359818	0.0687829	0	0	5	-0.283968	0.156899	0.0321843	0	0	#N/A	#N/A	#N/A	#N/A	0	0		0	NULL		0	NULL		0	NULL		0		0		0
Dctn4	8	2.29232	0.00539963	0.00400743	0	#N/A	#N/A	#N/A	#N/A	0	#N/A	#N/A	#N/A	#N/A	0	#N/A	#N/A	#N/A	#N/A	0	0	#N/A	#N/A	#N/A	#N/A	0	0	#N/A	#N/A	#N/A	#N/A	0	0		0	NULL		0	NULL		0	NULL		0		0		0
Ddb1	#N/A	#N/A	#N/A	#N/A	0	2	-5.42812	0.0137596	0.00289501	0	2	-3.74326	0.0311181	0.00991914	0	#N/A	#N/A	#N/A	#N/A	0	0	#N/A	#N/A	#N/A	#N/A	0	0	#N/A	#N/A	#N/A	#N/A	0	0		0	NULL		0	NULL		0	NULL		0		0		0
Ddost	3	3.38927	0.00025162	8.67027e-05	0	2	0.499006	0.254052	0.173259	0	2	0.90698	0.0904909	0.0407045	0	14	0.207062	0.560159	0.227862	0	0	12	0.301567	0.134403	0.0234373	0	0	#N/A	#N/A	#N/A	#N/A	0	0		0	NULL		0	NULL		0	NULL		0		0		0
Ddrgk1	#N/A	#N/A	#N/A	#N/A	0	#N/A	#N/A	#N/A	#N/A	0	#N/A	#N/A	#N/A	#N/A	0	4	-0.854855	0.125002	0.00505688	0	0	3	0.13551	0.671319	0.475912	0	0	#N/A	#N/A	#N/A	#N/A	0	0		0	NULL		0	NULL		0	NULL		0		0		0
Ddx1	8	3.96899	1.92719e-05	4.27233e-06	Drosha IP	12	0.13631	0.709652	0.631565	0	12	0.620185	0.640897	0.538602	0	37	0.276826	0.361235	0.070004	0	0	28	0.16906	0.622878	0.423796	0	0	#N/A	#N/A	#N/A	#N/A	0	0		0	NULL		0	NULL		1	Ddx1		0		0		0
Ddx17	8	3.20307	0.00011307	3.39209e-05	Drosha IP	13	1.02995	0.0342159	0.0119983	PD 3' UTR (vs AR RNA)	13	2.66066	0.00561447	0.000549906	PD 5' UTR (vs AR RNA)	25	-0.00854708	0.963185	0.893184	0	0	20	0.0230488	0.696512	0.514447	0	0	20	0.143739	0.501025	0.262595	0	0		1	NULL		1	Ddx17		1	Ddx17		0		0		0
Ddx18	3	2.74778	0.000874607	0.000391859	0	7	0.0921302	0.767489	0.710879	0	7	1.80656	0.0276333	0.00838689	PD 5' UTR (vs AR RNA)	12	0.542371	0.414894	0.10382	0	0	7	0.0236163	0.617131	0.414058	0	0	10	0.644262	0.36231	0.132074	0	0		0	NULL		1	Ddx18		0	NULL		0		0		1	Ddx18
Ddx19a	#N/A	#N/A	#N/A	#N/A	0	#N/A	#N/A	#N/A	#N/A	0	#N/A	#N/A	#N/A	#N/A	0	5	0.669129	0.665237	0.381485	0	0	4	-0.0615984	0.973439	0.956799	0	0	#N/A	#N/A	#N/A	#N/A	0	0		0	NULL		0	NULL		0	NULL		0		0		0
Ddx21	8	2.59519	0.000980039	0.000453113	0	22	0.245252	0.720487	0.645563	0	22	1.54351	0.677898	0.580353	0	52	0.298708	0.359818	0.0681144	0	0	44	-0.0862822	0.799373	0.662159	0	0	#N/A	#N/A	#N/A	#N/A	0	0		0	NULL		0	NULL		0	NULL		0		0		0
Ddx24	2	2.24653	0.00436759	0.00306257	0	#N/A	#N/A	#N/A	#N/A	0	#N/A	#N/A	#N/A	#N/A	0	#N/A	#N/A	#N/A	#N/A	0	0	#N/A	#N/A	#N/A	#N/A	0	0	#N/A	#N/A	#N/A	#N/A	0	0		0	NULL		0	NULL		0	NULL		0		0		0
Ddx27	2	2.37128	0.00615236	0.00471434	0	#N/A	#N/A	#N/A	#N/A	0	#N/A	#N/A	#N/A	#N/A	0	4	1.73481	0.272641	0.0294604	0	0	2	0.323521	0.247994	0.0814282	0	0	#N/A	#N/A	#N/A	#N/A	0	0		0	NULL		0	NULL		0	NULL		0		0		0
Ddx39b	2	3.4207	4.27078e-06	8.18138e-07	0	5	2.12604	0.0706711	0.0333273	PD 3' UTR (vs AR RNA)	5	3.45366	0.0276596	0.00844806	PD 5' UTR (vs AR RNA)	11	-0.242275	0.455862	0.134312	0	0	10	-0.138059	0.530671	0.315227	0	0	8	0.415385	0.191695	0.0426111	0	0		1	NULL		1	Ddx39b		0	NULL		0		1	Ddx39b	0
Ddx3x	17	2.76107	0.000825797	0.000365142	0	21	0.0743967	0.889992	0.854478	0	21	0.963249	0.105438	0.0504533	0	36	0.0842987	0.671962	0.397075	0	0	36	0.0603788	0.616097	0.410731	0	0	#N/A	#N/A	#N/A	#N/A	0	0		0	NULL		0	NULL		0	NULL		0		0		0
Ddx3y	#N/A	#N/A	#N/A	#N/A	0	#N/A	#N/A	#N/A	#N/A	0	#N/A	#N/A	#N/A	#N/A	0	5	0.161223	0.795897	0.590286	0	0	2	-0.226483	0.596089	0.388477	0	0	#N/A	#N/A	#N/A	#N/A	0	0		0	NULL		0	NULL		0	NULL		0		0		0
Ddx41	#N/A	#N/A	#N/A	#N/A	0	#N/A	#N/A	#N/A	#N/A	0	#N/A	#N/A	#N/A	#N/A	0	2	-0.532177	0.530408	0.186614	0	0	4	-0.174541	0.530671	0.313451	0	0	#N/A	#N/A	#N/A	#N/A	0	0		0	NULL		0	NULL		0	NULL		0		0		0
Ddx42	#N/A	#N/A	#N/A	#N/A	0	#N/A	#N/A	#N/A	#N/A	0	#N/A	#N/A	#N/A	#N/A	0	10	-0.0247001	0.578233	0.263878	0	0	6	-0.291026	0.773014	0.6203	0	0	#N/A	#N/A	#N/A	#N/A	0	0		0	NULL		0	NULL		0	NULL		0		0		0
Ddx46	4	1.90352	0.00634909	0.00488803	0	5	-1.10678	0.0378578	0.0137332	0	5	-0.586739	0.295327	0.186052	0	13	-0.12433	0.924293	0.806754	0	0	15	-0.176223	0.247994	0.081246	0	0	#N/A	#N/A	#N/A	#N/A	0	0		0	NULL		0	NULL		0	NULL		0		0		0
Ddx47	#N/A	#N/A	#N/A	#N/A	0	2	-1.29725	0.566413	0.474636	0	2	3.11734	0.268359	0.164845	0	3	-0.0603774	0.896364	0.753615	0	0	3	0.319215	0.231439	0.0740142	0	0	#N/A	#N/A	#N/A	#N/A	0	0		0	NULL		0	NULL		0	NULL		0		0		0
Ddx5	25	2.93638	0.000327252	0.000119861	0	31	1.49727	0.0119213	0.00222129	PD 3' UTR (vs AR RNA)	31	3.09024	0.00431261	0.000302456	PD 5' UTR (vs AR RNA)	50	0.176408	0.617938	0.320591	0	0	45	-0.290561	0.219203	0.0663541	0	0	46	0.462101	0.166197	0.0274266	0	0		1	NULL		1	Ddx5		0	NULL		0		1	Ddx5	0
Ddx50	#N/A	#N/A	#N/A	#N/A	0	4	1.15964	0.326899	0.240332	0	4	3.63071	0.0169458	0.00385226	PD 5' UTR (vs AR RNA)	18	0.129007	0.746878	0.504103	0	0	15	-0.0761939	0.659493	0.463148	0	0	15	0.168555	0.508759	0.269834	0	0		0	NULL		1	Ddx50		0	NULL		0		0		1	Ddx50
Ddx52	#N/A	#N/A	#N/A	#N/A	0	3	0.988251	0.325291	0.237183	0	3	3.11821	0.0230744	0.00636151	0	#N/A	#N/A	#N/A	#N/A	0	0	#N/A	#N/A	#N/A	#N/A	0	0	#N/A	#N/A	#N/A	#N/A	0	0		0	NULL		0	NULL		0	NULL		0		0		0
Ddx54	#N/A	#N/A	#N/A	#N/A	0	2	2.31905	0.316548	0.228512	0	2	1.44637	0.629217	0.524221	0	#N/A	#N/A	#N/A	#N/A	0	0	#N/A	#N/A	#N/A	#N/A	0	0	#N/A	#N/A	#N/A	#N/A	0	0		0	NULL		0	NULL		0	NULL		0		0		0
Ddx56	2	2.16698	0.00578324	0.00436879	0	#N/A	#N/A	#N/A	#N/A	0	#N/A	#N/A	#N/A	#N/A	0	#N/A	#N/A	#N/A	#N/A	0	0	#N/A	#N/A	#N/A	#N/A	0	0	#N/A	#N/A	#N/A	#N/A	0	0		0	NULL		0	NULL		0	NULL		0		0		0
Ddx6	2	2.41022	0.00225144	0.00134001	0	5	-0.0716021	0.714459	0.636891	0	5	0.0920168	0.679983	0.58296	0	8	0.395374	0.566201	0.248004	0	0	8	0.140914	0.383334	0.170191	0	0	#N/A	#N/A	#N/A	#N/A	0	0		0	NULL		0	NULL		0	NULL		0		0		0
Decr1	#N/A	#N/A	#N/A	#N/A	0	#N/A	#N/A	#N/A	#N/A	0	#N/A	#N/A	#N/A	#N/A	0	8	0.0970952	0.908251	0.781015	0	0	8	0.306902	0.562885	0.350149	0	0	#N/A	#N/A	#N/A	#N/A	0	0		0	NULL		0	NULL		0	NULL		0		0		0
Degs1	#N/A	#N/A	#N/A	#N/A	0	#N/A	#N/A	#N/A	#N/A	0	#N/A	#N/A	#N/A	#N/A	0	3	-0.382902	0.413846	0.0990269	0	0	#N/A	#N/A	#N/A	#N/A	0	0	#N/A	#N/A	#N/A	#N/A	0	0		0	NULL		0	NULL		0	NULL		0		0		0
Dek	#N/A	#N/A	#N/A	#N/A	0	6	-0.0517938	0.754423	0.693303	0	6	-0.36819	0.467788	0.347871	0	9	0.0680449	0.671871	0.395779	0	0	9	0.305885	0.113076	0.0162628	0	0	#N/A	#N/A	#N/A	#N/A	0	0		0	NULL		0	NULL		0	NULL		0		0		0
Dennd2a	28	1.95487	0.0153608	0.0136211	0	#N/A	#N/A	#N/A	#N/A	0	#N/A	#N/A	#N/A	#N/A	0	#N/A	#N/A	#N/A	#N/A	0	0	#N/A	#N/A	#N/A	#N/A	0	0	#N/A	#N/A	#N/A	#N/A	0	0		0	NULL		0	NULL		0	NULL		0		0		0
Dgat1	#N/A	#N/A	#N/A	#N/A	0	#N/A	#N/A	#N/A	#N/A	0	#N/A	#N/A	#N/A	#N/A	0	2	-0.407716	0.856689	0.696782	0	0	2	0.514712	0.883363	0.781436	0	0	#N/A	#N/A	#N/A	#N/A	0	0		0	NULL		0	NULL		0	NULL		0		0		0
Dgcr8	30	7.27717	7.86925e-19	1.23253e-20	Drosha IP	#N/A	#N/A	#N/A	#N/A	0	#N/A	#N/A	#N/A	#N/A	0	4	0.545431	0.354313	0.0627186	0	0	2	-0.294514	0.134403	0.0236577	0	0	#N/A	#N/A	#N/A	#N/A	0	0		0	NULL		0	NULL		1	Dgcr8		0		0		0
Dhcr7	#N/A	#N/A	#N/A	#N/A	0	#N/A	#N/A	#N/A	#N/A	0	#N/A	#N/A	#N/A	#N/A	0	5	0.281392	0.565457	0.244799	0	0	5	0.248769	0.151313	0.0296782	0	0	#N/A	#N/A	#N/A	#N/A	0	0		0	NULL		0	NULL		0	NULL		0		0		0
Dhrs1	#N/A	#N/A	#N/A	#N/A	0	#N/A	#N/A	#N/A	#N/A	0	#N/A	#N/A	#N/A	#N/A	0	4	-0.656181	0.584944	0.2775	0	0	4	-0.0467569	0.797058	0.658082	0	0	#N/A	#N/A	#N/A	#N/A	0	0		0	NULL		0	NULL		0	NULL		0		0		0
Dhrs13	#N/A	#N/A	#N/A	#N/A	0	#N/A	#N/A	#N/A	#N/A	0	#N/A	#N/A	#N/A	#N/A	0	4	-0.00246162	0.98078	0.943042	0	0	4	0.447437	0.108734	0.01356	0	0	#N/A	#N/A	#N/A	#N/A	0	0		0	NULL		0	NULL		0	NULL		0		0		0
Dhrs4	#N/A	#N/A	#N/A	#N/A	0	#N/A	#N/A	#N/A	#N/A	0	#N/A	#N/A	#N/A	#N/A	0	#N/A	#N/A	#N/A	#N/A	0	0	4	0.408838	0.0819351	0.00766594	0	0	#N/A	#N/A	#N/A	#N/A	0	0		0	NULL		0	NULL		0	NULL		0		0		0
Dhx15	13	5.70536	3.07238e-11	2.221e-12	Drosha IP	14	-0.0114315	0.949767	0.935985	0	14	0.486887	0.230665	0.135578	0	34	0.113521	0.776218	0.56628	0	0	35	-0.0812128	0.672116	0.479044	0	0	#N/A	#N/A	#N/A	#N/A	0	0		0	NULL		0	NULL		1	Dhx15		0		0		0
Dhx29	#N/A	#N/A	#N/A	#N/A	0	6	1.48243	0.015646	0.00359462	PD 3' UTR (vs AR RNA)	6	0.677953	0.324331	0.210991	0	6	0.653099	0.414894	0.104265	0	0	2	0.0201589	0.885028	0.787952	0	0	5	1.06035	0.187237	0.0397362	0	0		1	NULL		0	NULL		0	NULL		1	Dhx29	0		0
Dhx30	3	2.92397	0.000378297	0.000142278	0	2	-4.66347	0.00105908	2.4332e-05	0	2	-6.50029	0.0269484	0.00802187	0	15	0.24052	0.821539	0.620281	0	0	10	0.0903967	0.517512	0.299033	0	0	#N/A	#N/A	#N/A	#N/A	0	0		0	NULL		0	NULL		0	NULL		0		0		0
Dhx36	#N/A	#N/A	#N/A	#N/A	0	5	-0.314688	0.663122	0.577325	0	5	-0.162522	0.999476	0.999476	0	17	0.540686	0.168334	0.00824346	0	0	13	-0.388113	0.441621	0.227009	0	0	#N/A	#N/A	#N/A	#N/A	0	0		0	NULL		0	NULL		0	NULL		0		0		0
Dhx9	16	4.18618	8.19104e-07	1.30267e-07	Drosha IP	36	0.7024	0.310078	0.221966	0	36	2.20279	0.0188029	0.00468367	PD 5' UTR (vs AR RNA)	70	0.826227	0.209449	0.016026	0	0	82	0.206379	0.264041	0.0908137	0	0	79	-0.464261	0.369065	0.140387	0	0		0	NULL		1	Dhx9		1	Dhx9		0		0		0
Diaph1	3	7.97986	5.28392e-24	2.54647e-26	0	#N/A	#N/A	#N/A	#N/A	0	#N/A	#N/A	#N/A	#N/A	0	#N/A	#N/A	#N/A	#N/A	0	0	#N/A	#N/A	#N/A	#N/A	0	0	#N/A	#N/A	#N/A	#N/A	0	0		0	NULL		0	NULL		0	NULL		0		0		0
Dido1	#N/A	#N/A	#N/A	#N/A	0	#N/A	#N/A	#N/A	#N/A	0	#N/A	#N/A	#N/A	#N/A	0	#N/A	#N/A	#N/A	#N/A	0	0	2	0.509499	0.168195	0.0394132	0	0	#N/A	#N/A	#N/A	#N/A	0	0		0	NULL		0	NULL		0	NULL		0		0		0
Dimt1	#N/A	#N/A	#N/A	#N/A	0	#N/A	#N/A	#N/A	#N/A	0	#N/A	#N/A	#N/A	#N/A	0	#N/A	#N/A	#N/A	#N/A	0	0	2	0.495924	0.334779	0.136695	0	0	#N/A	#N/A	#N/A	#N/A	0	0		0	NULL		0	NULL		0	NULL		0		0		0
Dis3	#N/A	#N/A	#N/A	#N/A	0	#N/A	#N/A	#N/A	#N/A	0	#N/A	#N/A	#N/A	#N/A	0	#N/A	#N/A	#N/A	#N/A	0	0	5	-0.0663481	0.797052	0.655329	0	0	#N/A	#N/A	#N/A	#N/A	0	0		0	NULL		0	NULL		0	NULL		0		0		0
Dis3l2	#N/A	#N/A	#N/A	#N/A	0	4	-6.01998	0.000450386	5.99063e-06	0	4	-5.20497	0.00206196	3.12426e-05	0	#N/A	#N/A	#N/A	#N/A	0	0	#N/A	#N/A	#N/A	#N/A	0	0	#N/A	#N/A	#N/A	#N/A	0	0		0	NULL		0	NULL		0	NULL		0		0		0
Dkc1	2	2.31369	0.00171543	0.000948599	0	2	2.58502	0.017939	0.00462033	0	2	3.95503	0.0054547	0.000453911	0	10	0.0336296	0.6822	0.412999	0	0	9	-0.10596	0.592179	0.381304	0	0	#N/A	#N/A	#N/A	#N/A	0	0		0	NULL		0	NULL		0	NULL		0		0		0
Dlat	#N/A	#N/A	#N/A	#N/A	0	#N/A	#N/A	#N/A	#N/A	0	#N/A	#N/A	#N/A	#N/A	0	7	0.0328302	0.776218	0.56553	0	0	7	-0.145511	0.505357	0.284353	0	0	#N/A	#N/A	#N/A	#N/A	0	0		0	NULL		0	NULL		0	NULL		0		0		0
Dlst	#N/A	#N/A	#N/A	#N/A	0	#N/A	#N/A	#N/A	#N/A	0	#N/A	#N/A	#N/A	#N/A	0	9	0.36344	0.269491	0.0283407	0	0	9	0.284391	0.932747	0.866628	0	0	#N/A	#N/A	#N/A	#N/A	0	0		0	NULL		0	NULL		0	NULL		0		0		0
Dnaja1	#N/A	#N/A	#N/A	#N/A	0	#N/A	#N/A	#N/A	#N/A	0	#N/A	#N/A	#N/A	#N/A	0	5	0.154622	0.655913	0.365435	0	0	4	-0.0210958	0.97958	0.966323	0	0	#N/A	#N/A	#N/A	#N/A	0	0		0	NULL		0	NULL		0	NULL		0		0		0
Dnaja2	#N/A	#N/A	#N/A	#N/A	0	#N/A	#N/A	#N/A	#N/A	0	#N/A	#N/A	#N/A	#N/A	0	7	0.0722831	0.608892	0.313737	0	0	5	0.100959	0.745524	0.58397	0	0	#N/A	#N/A	#N/A	#N/A	0	0		0	NULL		0	NULL		0	NULL		0		0		0
Dnajb11	#N/A	#N/A	#N/A	#N/A	0	#N/A	#N/A	#N/A	#N/A	0	#N/A	#N/A	#N/A	#N/A	0	2	-0.323993	0.814543	0.613364	0	0	2	0.110554	0.95251	0.915197	0	0	#N/A	#N/A	#N/A	#N/A	0	0		0	NULL		0	NULL		0	NULL		0		0		0
Dnajb12	2	2.87239	0.000104982	3.09886e-05	0	#N/A	#N/A	#N/A	#N/A	0	#N/A	#N/A	#N/A	#N/A	0	6	0.595096	0.565465	0.246814	0	0	5	0.254242	0.542816	0.325222	0	0	#N/A	#N/A	#N/A	#N/A	0	0		0	NULL		0	NULL		0	NULL		0		0		0
Dnajc2	#N/A	#N/A	#N/A	#N/A	0	5	4.11413	0.00245599	8.90928e-05	PD 3' UTR (vs AR RNA)	5	2.04923	0.0412992	0.0142425	PD 5' UTR (vs AR RNA)	#N/A	#N/A	#N/A	#N/A	0	0	#N/A	#N/A	#N/A	#N/A	0	0	2	0.293503	0.436296	0.205253	0	0		1	NULL		1	Dnajc2		0	NULL		0		1	Dnajc2	0
Dnajc9	#N/A	#N/A	#N/A	#N/A	0	#N/A	#N/A	#N/A	#N/A	0	#N/A	#N/A	#N/A	#N/A	0	3	-0.771997	0.559571	0.221233	0	0	2	0.383596	0.48518	0.267126	0	0	#N/A	#N/A	#N/A	#N/A	0	0		0	NULL		0	NULL		0	NULL		0		0		0
Dnm1l	#N/A	#N/A	#N/A	#N/A	0	2	-2.06265	0.0939775	0.0486365	0	2	-3.92316	0.0335353	0.0109081	0	7	0.089292	0.98211	0.945865	0	0	5	-0.10441	0.891869	0.79742	0	0	#N/A	#N/A	#N/A	#N/A	0	0		0	NULL		0	NULL		0	NULL		0		0		0
Dnm2	#N/A	#N/A	#N/A	#N/A	0	#N/A	#N/A	#N/A	#N/A	0	#N/A	#N/A	#N/A	#N/A	0	14	-0.409785	0.349073	0.0599615	0	0	8	-0.0700796	0.517512	0.298823	0	0	#N/A	#N/A	#N/A	#N/A	0	0		0	NULL		0	NULL		0	NULL		0		0		0
Dnmt1	#N/A	#N/A	#N/A	#N/A	0	4	0.856946	0.141924	0.0837471	0	4	2.41316	0.0120602	0.00230183	PD 5' UTR (vs AR RNA)	12	-0.257417	0.562104	0.236172	0	0	9	0.00284622	0.648298	0.451068	0	0	10	0.260707	0.658554	0.446065	0	0		0	NULL		1	Dnmt1		0	NULL		0		0		1	Dnmt1
Dock1	#N/A	#N/A	#N/A	#N/A	0	3	-0.574572	0.124683	0.0707476	0	3	0.85668	0.295148	0.185226	0	4	-0.0722209	0.671255	0.394513	0	0	#N/A	#N/A	#N/A	#N/A	0	0	#N/A	#N/A	#N/A	#N/A	0	0		0	NULL		0	NULL		0	NULL		0		0		0
Dock7	44	2.1081	0.00928736	0.00764249	0	#N/A	#N/A	#N/A	#N/A	0	#N/A	#N/A	#N/A	#N/A	0	5	-0.67075	0.581652	0.266972	0	0	3	0.359138	0.47751	0.257461	0	0	#N/A	#N/A	#N/A	#N/A	0	0		0	NULL		0	NULL		0	NULL		0		0		0
Dpm1	#N/A	#N/A	#N/A	#N/A	0	#N/A	#N/A	#N/A	#N/A	0	#N/A	#N/A	#N/A	#N/A	0	3	0.113244	0.743656	0.499817	0	0	3	0.203479	0.402684	0.19073	0	0	#N/A	#N/A	#N/A	#N/A	0	0		0	NULL		0	NULL		0	NULL		0		0		0
Dpy19l1	#N/A	#N/A	#N/A	#N/A	0	#N/A	#N/A	#N/A	#N/A	0	#N/A	#N/A	#N/A	#N/A	0	2	0.453948	0.456363	0.135387	0	0	2	0.390686	0.383334	0.169365	0	0	#N/A	#N/A	#N/A	#N/A	0	0		0	NULL		0	NULL		0	NULL		0		0		0
Dpy19l4	#N/A	#N/A	#N/A	#N/A	0	#N/A	#N/A	#N/A	#N/A	0	#N/A	#N/A	#N/A	#N/A	0	#N/A	#N/A	#N/A	#N/A	0	0	2	0.486625	0.70768	0.53076	0	0	#N/A	#N/A	#N/A	#N/A	0	0		0	NULL		0	NULL		0	NULL		0		0		0
Dpysl2	#N/A	#N/A	#N/A	#N/A	0	15	-1.19944	0.117351	0.0659701	0	15	-1.10232	0.528721	0.413958	0	#N/A	#N/A	#N/A	#N/A	0	0	#N/A	#N/A	#N/A	#N/A	0	0	#N/A	#N/A	#N/A	#N/A	0	0		0	NULL		0	NULL		0	NULL		0		0		0
Dpysl3	#N/A	#N/A	#N/A	#N/A	0	2	-2.12223	0.476143	0.381721	0	2	-3.62989	0.0716527	0.0303246	0	#N/A	#N/A	#N/A	#N/A	0	0	#N/A	#N/A	#N/A	#N/A	0	0	#N/A	#N/A	#N/A	#N/A	0	0		0	NULL		0	NULL		0	NULL		0		0		0
Drg1	#N/A	#N/A	#N/A	#N/A	0	7	2.55485	0.0064192	0.000861119	PD 3' UTR (vs AR RNA)	7	1.87233	0.116001	0.0579194	0	13	0.171777	0.769554	0.551178	0	0	7	0.0479811	0.833171	0.703804	0	0	10	0.538128	0.153547	0.0239523	0	0		1	NULL		0	NULL		0	NULL		1	Drg1	0		0
Drg2	#N/A	#N/A	#N/A	#N/A	0	#N/A	#N/A	#N/A	#N/A	0	#N/A	#N/A	#N/A	#N/A	0	3	0.265987	0.531665	0.189055	0	0	#N/A	#N/A	#N/A	#N/A	0	0	#N/A	#N/A	#N/A	#N/A	0	0		0	NULL		0	NULL		0	NULL		0		0		0
Drosha	20	4.71029	1.51422e-08	1.84261e-09	Drosha IP	2	0.866695	0.300615	0.212305	0	2	1.43276	0.195687	0.110266	0	#N/A	#N/A	#N/A	#N/A	0	0	2	-0.201576	0.867571	0.756344	0	0	#N/A	#N/A	#N/A	#N/A	0	0		0	NULL		0	NULL		1	Drosha		0		0		0
Dst	5	2.47098	0.000980039	0.000453415	0	2	1.50908	0.510352	0.413465	0	2	2.16078	0.194873	0.109499	0	#N/A	#N/A	#N/A	#N/A	0	0	#N/A	#N/A	#N/A	#N/A	0	0	#N/A	#N/A	#N/A	#N/A	0	0		0	NULL		0	NULL		0	NULL		0		0		0
Dus3l	#N/A	#N/A	#N/A	#N/A	0	9	2.49572	0.00704636	0.00100437	PD 3' UTR (vs AR RNA)	9	2.05358	0.0418193	0.014614	PD 5' UTR (vs AR RNA)	10	-0.0198279	0.628946	0.339693	0	0	8	0.595684	0.332406	0.135103	0	0	10	0.141896	0.692399	0.495708	0	0		1	NULL		1	Dus3l		0	NULL		0		1	Dus3l	0
Dync1h1	#N/A	#N/A	#N/A	#N/A	0	26	-0.701902	0.326899	0.240129	0	26	-0.0800412	0.949276	0.915989	0	128	-0.134041	0.727028	0.473677	0	0	102	-0.114804	0.441621	0.224616	0	0	#N/A	#N/A	#N/A	#N/A	0	0		0	NULL		0	NULL		0	NULL		0		0		0
Dync1i2	#N/A	#N/A	#N/A	#N/A	0	#N/A	#N/A	#N/A	#N/A	0	#N/A	#N/A	#N/A	#N/A	0	3	-0.532836	0.710436	0.439674	0	0	3	-0.0350665	0.66204	0.468238	0	0	#N/A	#N/A	#N/A	#N/A	0	0		0	NULL		0	NULL		0	NULL		0		0		0
Dync1li1	#N/A	#N/A	#N/A	#N/A	0	#N/A	#N/A	#N/A	#N/A	0	#N/A	#N/A	#N/A	#N/A	0	2	-0.653992	0.435917	0.122205	0	0	#N/A	#N/A	#N/A	#N/A	0	0	#N/A	#N/A	#N/A	#N/A	0	0		0	NULL		0	NULL		0	NULL		0		0		0
Dynll1	#N/A	#N/A	#N/A	#N/A	0	#N/A	#N/A	#N/A	#N/A	0	#N/A	#N/A	#N/A	#N/A	0	2	-0.242219	0.671255	0.391806	0	0	#N/A	#N/A	#N/A	#N/A	0	0	#N/A	#N/A	#N/A	#N/A	0	0		0	NULL		0	NULL		0	NULL		0		0		0
Ebna1bp2	3	2.15724	0.0109846	0.00923768	0	#N/A	#N/A	#N/A	#N/A	0	#N/A	#N/A	#N/A	#N/A	0	3	-0.179831	0.671962	0.396466	0	0	#N/A	#N/A	#N/A	#N/A	0	0	#N/A	#N/A	#N/A	#N/A	0	0		0	NULL		0	NULL		0	NULL		0		0		0
Echs1	#N/A	#N/A	#N/A	#N/A	0	#N/A	#N/A	#N/A	#N/A	0	#N/A	#N/A	#N/A	#N/A	0	4	0.122118	0.860824	0.707477	0	0	5	0.463173	0.0928404	0.00985272	0	0	#N/A	#N/A	#N/A	#N/A	0	0		0	NULL		0	NULL		0	NULL		0		0		0
Eci2	#N/A	#N/A	#N/A	#N/A	0	#N/A	#N/A	#N/A	#N/A	0	#N/A	#N/A	#N/A	#N/A	0	4	0.0535883	0.866095	0.712423	0	0	6	-0.0317012	0.8458	0.720496	0	0	#N/A	#N/A	#N/A	#N/A	0	0		0	NULL		0	NULL		0	NULL		0		0		0
Edc4	#N/A	#N/A	#N/A	#N/A	0	#N/A	#N/A	#N/A	#N/A	0	#N/A	#N/A	#N/A	#N/A	0	3	0.691864	0.414828	0.100196	0	0	4	-0.184382	0.267056	0.0928228	0	0	#N/A	#N/A	#N/A	#N/A	0	0		0	NULL		0	NULL		0	NULL		0		0		0
Edf1	#N/A	#N/A	#N/A	#N/A	0	#N/A	#N/A	#N/A	#N/A	0	#N/A	#N/A	#N/A	#N/A	0	#N/A	#N/A	#N/A	#N/A	0	0	5	0.993286	0.0725963	0.00588718	0	0	#N/A	#N/A	#N/A	#N/A	0	0		0	NULL		0	NULL		0	NULL		0		0		0
Ednrb	#N/A	#N/A	#N/A	#N/A	0	#N/A	#N/A	#N/A	#N/A	0	#N/A	#N/A	#N/A	#N/A	0	2	-0.652189	0.559571	0.218494	0	0	2	0.308917	0.19513	0.0534263	0	0	#N/A	#N/A	#N/A	#N/A	0	0		0	NULL		0	NULL		0	NULL		0		0		0
Eef1a1	17	1.73953	0.0430686	0.0402665	0	31	-0.342705	0.439463	0.349126	0	31	1.41184	0.0412992	0.0143324	PD 5' UTR (vs AR RNA)	37	0.2739	0.314955	0.043812	0	0	37	0.363555	0.301791	0.115644	0	0	36	-0.425778	0.142152	0.0197239	0	0		0	NULL		1	Eef1a1		0	NULL		0		0		1	Eef1a1
Eef1b	#N/A	#N/A	#N/A	#N/A	0	2	-2.02671	0.155677	0.0952508	0	2	2.82328	0.0200783	0.00520216	0	5	0.913208	0.349073	0.0585038	0	0	4	-0.318481	0.589331	0.378676	0	0	#N/A	#N/A	#N/A	#N/A	0	0		0	NULL		0	NULL		0	NULL		0		0		0
Eef1d	2	2.89248	0.000911423	0.000415082	0	7	-0.319153	0.376271	0.285729	0	7	1.58325	0.0568043	0.0221173	PD 5' UTR (vs AR RNA)	10	0.301581	0.332939	0.052221	0	0	12	-0.0426382	0.920116	0.846061	0	0	9	0.0351093	0.867791	0.750233	0	0		0	NULL		1	Eef1d		0	NULL		0		0		1	Eef1d
Eef1e1	#N/A	#N/A	#N/A	#N/A	0	#N/A	#N/A	#N/A	#N/A	0	#N/A	#N/A	#N/A	#N/A	0	7	-1.10073	0.0744313	0.00126782	0	0	6	-0.945158	0.0134794	0.00039363	0	0	#N/A	#N/A	#N/A	#N/A	0	0		0	NULL		0	NULL		0	NULL		0		0		0
Eef1g	#N/A	#N/A	#N/A	#N/A	0	7	-0.517909	0.344474	0.254919	0	7	-1.90472	0.0972139	0.0450833	0	13	0.146673	0.559571	0.223412	0	0	12	-0.0121166	0.745524	0.585141	0	0	#N/A	#N/A	#N/A	#N/A	0	0		0	NULL		0	NULL		0	NULL		0		0		0
Eef2	2	3.16438	0.00075479	0.000328785	0	21	-2.21379	0.0739057	0.035233	0	21	0.257021	0.7625	0.670299	0	#N/A	#N/A	#N/A	#N/A	0	0	#N/A	#N/A	#N/A	#N/A	0	0	#N/A	#N/A	#N/A	#N/A	0	0		0	NULL		0	NULL		0	NULL		0		0		0
Eefsec	#N/A	#N/A	#N/A	#N/A	0	4	2.41267	0.0291616	0.00895654	PD 3' UTR (vs AR RNA)	4	3.19179	0.0147276	0.00322334	PD 5' UTR (vs AR RNA)	2	0.00488226	0.97155	0.924662	0	0	4	0.574584	0.186926	0.0483203	0	0	4	-0.835287	0.0986936	0.00964248	0	0		1	NULL		1	Eefsec		0	NULL		0		1	Eefsec	0
Efhd1	9	2.50197	0.00816309	0.00655998	0	#N/A	#N/A	#N/A	#N/A	0	#N/A	#N/A	#N/A	#N/A	0	#N/A	#N/A	#N/A	#N/A	0	0	#N/A	#N/A	#N/A	#N/A	0	0	#N/A	#N/A	#N/A	#N/A	0	0		0	NULL		0	NULL		0	NULL		0		0		0
Efhd2	14	1.81165	0.065972	0.0627927	0	#N/A	#N/A	#N/A	#N/A	0	#N/A	#N/A	#N/A	#N/A	0	#N/A	#N/A	#N/A	#N/A	0	0	#N/A	#N/A	#N/A	#N/A	0	0	#N/A	#N/A	#N/A	#N/A	0	0		0	NULL		0	NULL		0	NULL		0		0		0
Eftud2	11	6.09014	1.41e-12	7.30483e-14	Drosha IP	7	0.626013	0.222755	0.147606	0	7	1.65013	0.0349606	0.011414	PD 5' UTR (vs AR RNA)	38	-0.170353	0.560159	0.227041	0	0	33	-0.020774	0.68991	0.507604	0	0	38	0.194601	0.369065	0.140849	0	0		0	NULL		1	Eftud2		1	Eftud2		0		0		0
Egfr	#N/A	#N/A	#N/A	#N/A	0	#N/A	#N/A	#N/A	#N/A	0	#N/A	#N/A	#N/A	#N/A	0	4	-0.126125	0.498412	0.160595	0	0	5	-0.257297	0.354802	0.149098	0	0	#N/A	#N/A	#N/A	#N/A	0	0		0	NULL		0	NULL		0	NULL		0		0		0
Ei24	#N/A	#N/A	#N/A	#N/A	0	#N/A	#N/A	#N/A	#N/A	0	#N/A	#N/A	#N/A	#N/A	0	3	-0.0906796	0.765604	0.537551	0	0	4	0.103828	0.452183	0.236398	0	0	#N/A	#N/A	#N/A	#N/A	0	0		0	NULL		0	NULL		0	NULL		0		0		0
Eif1ax	#N/A	#N/A	#N/A	#N/A	0	2	-0.509749	0.202971	0.13106	0	2	0.25535	0.965275	0.948934	0	4	0.236836	0.363938	0.0740875	0	0	3	0.463079	0.149773	0.0284825	0	0	#N/A	#N/A	#N/A	#N/A	0	0		0	NULL		0	NULL		0	NULL		0		0		0
Eif1b	#N/A	#N/A	#N/A	#N/A	0	2	0.234582	0.958517	0.949245	0	2	-0.245961	0.597051	0.485149	0	#N/A	#N/A	#N/A	#N/A	0	0	#N/A	#N/A	#N/A	#N/A	0	0	#N/A	#N/A	#N/A	#N/A	0	0		0	NULL		0	NULL		0	NULL		0		0		0
Eif2a	3	2.5705	0.00144689	0.00076354	0	#N/A	#N/A	#N/A	#N/A	0	#N/A	#N/A	#N/A	#N/A	0	6	-0.0684176	0.744257	0.501278	0	0	4	0.101673	0.510864	0.288544	0	0	#N/A	#N/A	#N/A	#N/A	0	0		0	NULL		0	NULL		0	NULL		0		0		0
Eif2ak2	#N/A	#N/A	#N/A	#N/A	0	4	1.12037	0.0609412	0.0268415	PD 3' UTR (vs AR RNA)	4	2.93597	0.00703918	0.000902241	PD 5' UTR (vs AR RNA)	12	0.845696	0.414828	0.101513	0	0	14	0.10763	0.394401	0.181148	0	0	11	-0.26236	0.469467	0.232624	0	0		1	NULL		1	Eif2ak2		0	NULL		0		1	Eif2ak2	0
Eif2b4	#N/A	#N/A	#N/A	#N/A	0	#N/A	#N/A	#N/A	#N/A	0	#N/A	#N/A	#N/A	#N/A	0	3	-0.316493	0.319838	0.0461258	0	0	3	-0.122519	0.466758	0.248672	0	0	#N/A	#N/A	#N/A	#N/A	0	0		0	NULL		0	NULL		0	NULL		0		0		0
Eif2s1	#N/A	#N/A	#N/A	#N/A	0	14	1.78012	0.0142293	0.00306266	PD 3' UTR (vs AR RNA)	14	2.75844	0.00519395	0.000405176	PD 5' UTR (vs AR RNA)	23	0.106581	0.674088	0.401869	0	0	18	-0.0181641	0.660863	0.465052	0	0	24	0.427144	0.435355	0.204453	0	0		1	NULL		1	Eif2s1		0	NULL		0		1	Eif2s1	0
Eif2s2	#N/A	#N/A	#N/A	#N/A	0	4	2.61403	0.00398212	0.000322614	PD 3' UTR (vs AR RNA)	4	3.55234	0.00261542	0.000104364	PD 5' UTR (vs AR RNA)	17	-0.0665107	0.797397	0.591964	0	0	13	0.300063	0.276399	0.100205	0	0	11	0.114074	0.997893	0.989755	0	0		1	NULL		1	Eif2s2		0	NULL		0		1	Eif2s2	0
Eif2s3x	3	3.96854	3.02922e-05	7.39072e-06	0	5	0.13618	0.854106	0.809697	0	5	-0.230044	0.983363	0.977418	0	18	0.0223581	0.924293	0.808095	0	0	15	0.109135	0.686401	0.498727	0	0	#N/A	#N/A	#N/A	#N/A	0	0		0	NULL		0	NULL		0	NULL		0		0		0
Eif3a	#N/A	#N/A	#N/A	#N/A	0	7	0.393662	0.439463	0.349121	0	7	1.19657	0.0652499	0.0260368	PD 5' UTR (vs AR RNA)	51	0.0010267	0.924293	0.806906	0	0	49	-0.10926	0.402684	0.189401	0	0	48	0.0849819	0.931129	0.872264	0	0		0	NULL		1	Eif3a		0	NULL		0		0		1	Eif3a
Eif3b	2	2.39299	0.00191513	0.00107524	0	#N/A	#N/A	#N/A	#N/A	0	#N/A	#N/A	#N/A	#N/A	0	16	-0.090695	0.995273	0.974082	0	0	14	-0.150343	0.562302	0.347634	0	0	#N/A	#N/A	#N/A	#N/A	0	0		0	NULL		0	NULL		0	NULL		0		0		0
Eif3c	#N/A	#N/A	#N/A	#N/A	0	3	-1.33984	0.0887749	0.0450852	0	3	-4.54162	0.00633368	0.00074098	0	23	-0.0994904	0.995552	0.979975	0	0	22	-0.0376377	0.599259	0.392677	0	0	#N/A	#N/A	#N/A	#N/A	0	0		0	NULL		0	NULL		0	NULL		0		0		0
Eif3d	#N/A	#N/A	#N/A	#N/A	0	7	1.08883	0.112133	0.0619646	0	7	1.42817	0.047414	0.0171997	PD 5' UTR (vs AR RNA)	15	-0.351442	0.413719	0.0983648	0	0	12	-0.166669	0.309912	0.120742	0	0	11	0.223273	0.563541	0.324337	0	0		0	NULL		1	Eif3d		0	NULL		0		0		1	Eif3d
Eif3e	#N/A	#N/A	#N/A	#N/A	0	2	1.60857	0.0164371	0.00398886	0	2	-1.21012	0.125666	0.0636688	0	7	0.143941	0.995552	0.978315	0	0	8	-0.320452	0.16077	0.0344956	0	0	#N/A	#N/A	#N/A	#N/A	0	0		0	NULL		0	NULL		0	NULL		0		0		0
Eif3f	#N/A	#N/A	#N/A	#N/A	0	#N/A	#N/A	#N/A	#N/A	0	#N/A	#N/A	#N/A	#N/A	0	9	-0.116639	0.823981	0.62281	0	0	7	-0.28348	0.231439	0.0739497	0	0	#N/A	#N/A	#N/A	#N/A	0	0		0	NULL		0	NULL		0	NULL		0		0		0
Eif3g	#N/A	#N/A	#N/A	#N/A	0	#N/A	#N/A	#N/A	#N/A	0	#N/A	#N/A	#N/A	#N/A	0	5	-0.511731	0.848343	0.678863	0	0	3	0.30151	0.530671	0.314632	0	0	#N/A	#N/A	#N/A	#N/A	0	0		0	NULL		0	NULL		0	NULL		0		0		0
Eif3h	#N/A	#N/A	#N/A	#N/A	0	3	-0.386237	0.302649	0.214452	0	3	-0.541371	0.4844	0.365497	0	3	-0.295396	0.853797	0.693218	0	0	4	-0.285928	0.36424	0.156177	0	0	#N/A	#N/A	#N/A	#N/A	0	0		0	NULL		0	NULL		0	NULL		0		0		0
Eif3i	2	3.22808	0.00014528	4.65595e-05	0	3	0.320122	0.896208	0.862613	0	3	1.55495	0.245807	0.148911	0	8	-0.0804303	0.770892	0.554281	0	0	7	0.0213938	0.891869	0.801099	0	0	#N/A	#N/A	#N/A	#N/A	0	0		0	NULL		0	NULL		0	NULL		0		0		0
Eif3k	#N/A	#N/A	#N/A	#N/A	0	#N/A	#N/A	#N/A	#N/A	0	#N/A	#N/A	#N/A	#N/A	0	#N/A	#N/A	#N/A	#N/A	0	0	2	-0.180088	0.367285	0.158006	0	0	#N/A	#N/A	#N/A	#N/A	0	0		0	NULL		0	NULL		0	NULL		0		0		0
Eif3l	#N/A	#N/A	#N/A	#N/A	0	2	-0.875313	0.251132	0.170964	0	2	-1.46301	0.106788	0.0516508	0	8	0.0747746	0.829782	0.632864	0	0	10	-0.315473	0.191089	0.051411	0	0	#N/A	#N/A	#N/A	#N/A	0	0		0	NULL		0	NULL		0	NULL		0		0		0
Eif3m	#N/A	#N/A	#N/A	#N/A	0	#N/A	#N/A	#N/A	#N/A	0	#N/A	#N/A	#N/A	#N/A	0	#N/A	#N/A	#N/A	#N/A	0	0	3	-0.651095	0.318791	0.126699	0	0	#N/A	#N/A	#N/A	#N/A	0	0		0	NULL		0	NULL		0	NULL		0		0		0
Eif4a1	#N/A	#N/A	#N/A	#N/A	0	6	0.642479	0.56644	0.476028	0	6	0.542072	0.301951	0.191686	0	19	-0.0644626	0.957944	0.878384	0	0	24	-0.075273	0.897564	0.813283	0	0	#N/A	#N/A	#N/A	#N/A	0	0		0	NULL		0	NULL		0	NULL		0		0		0
Eif4a3	9	5.25286	1.75902e-10	1.44112e-11	Drosha IP	#N/A	#N/A	#N/A	#N/A	0	#N/A	#N/A	#N/A	#N/A	0	23	0.140764	0.566329	0.250218	0	0	17	-0.212007	0.397582	0.183731	0	0	#N/A	#N/A	#N/A	#N/A	0	0		0	NULL		0	NULL		1	Eif4a3		0		0		0
Eif4b	5	2.66768	0.00046978	0.000185082	0	3	-6.24697	0.0284206	0.00852274	0	3	-2.44584	0.391161	0.273064	0	6	0.61026	0.505117	0.1667	0	0	4	0.422261	0.505162	0.283431	0	0	#N/A	#N/A	#N/A	#N/A	0	0		0	NULL		0	NULL		0	NULL		0		0		0
Eif4e	#N/A	#N/A	#N/A	#N/A	0	3	1.05513	0.511132	0.414715	0	3	0.100991	0.962137	0.944686	0	4	-0.231129	0.725805	0.469275	0	0	3	-0.183489	0.441621	0.224627	0	0	#N/A	#N/A	#N/A	#N/A	0	0		0	NULL		0	NULL		0	NULL		0		0		0
Eif4g1	9	3.05539	0.000284532	0.000102157	Drosha IP	4	-2.32655	0.0531894	0.0217388	0	4	-1.83976	0.0750141	0.0322007	0	19	-0.0741802	0.893381	0.748817	0	0	12	-5.11181e-05	0.947683	0.907184	0	0	#N/A	#N/A	#N/A	#N/A	0	0		0	NULL		0	NULL		1	Eif4g1		0		0		0
Eif4g2	#N/A	#N/A	#N/A	#N/A	0	#N/A	#N/A	#N/A	#N/A	0	#N/A	#N/A	#N/A	#N/A	0	7	0.0147307	0.737366	0.4892	0	0	6	0.00301914	0.933905	0.873396	0	0	#N/A	#N/A	#N/A	#N/A	0	0		0	NULL		0	NULL		0	NULL		0		0		0
Eif4h	#N/A	#N/A	#N/A	#N/A	0	3	-0.504232	0.425667	0.332581	0	3	1.0393	0.778379	0.69087	0	4	-0.157178	0.608459	0.310003	0	0	3	-0.324792	0.417139	0.206519	0	0	#N/A	#N/A	#N/A	#N/A	0	0		0	NULL		0	NULL		0	NULL		0		0		0
Eif5	#N/A	#N/A	#N/A	#N/A	0	3	0.0943831	0.358827	0.268144	0	3	-1.66683	0.185599	0.102113	0	#N/A	#N/A	#N/A	#N/A	0	0	#N/A	#N/A	#N/A	#N/A	0	0	#N/A	#N/A	#N/A	#N/A	0	0		0	NULL		0	NULL		0	NULL		0		0		0
Eif5a	#N/A	#N/A	#N/A	#N/A	0	5	-2.34561	0.0157812	0.00365633	0	5	-3.90311	0.023089	0.00642138	0	#N/A	#N/A	#N/A	#N/A	0	0	#N/A	#N/A	#N/A	#N/A	0	0	#N/A	#N/A	#N/A	#N/A	0	0		0	NULL		0	NULL		0	NULL		0		0		0
Eif5a2	#N/A	#N/A	#N/A	#N/A	0	#N/A	#N/A	#N/A	#N/A	0	#N/A	#N/A	#N/A	#N/A	0	5	-0.185057	0.540157	0.199979	0	0	4	0.111251	0.565412	0.356	0	0	#N/A	#N/A	#N/A	#N/A	0	0		0	NULL		0	NULL		0	NULL		0		0		0
Eif5b	#N/A	#N/A	#N/A	#N/A	0	9	0.892177	0.154	0.0932771	0	9	2.16758	0.0215535	0.00586401	PD 5' UTR (vs AR RNA)	14	-0.126691	0.893381	0.748792	0	0	14	0.0546408	0.99278	0.989711	0	0	13	0.174096	0.738449	0.560809	0	0		0	NULL		1	Eif5b		0	NULL		0		0		1	Eif5b
Eif6	#N/A	#N/A	#N/A	#N/A	0	2	0.797766	0.154343	0.093875	0	2	1.79283	0.0356735	0.0117761	0	3	0.154284	0.5897	0.281666	0	0	3	0.0979042	0.441621	0.228278	0	0	#N/A	#N/A	#N/A	#N/A	0	0		0	NULL		0	NULL		0	NULL		0		0		0
Elavl1	7	4.8023	5.0147e-08	6.52516e-09	Drosha IP	18	-5.63749	0.00236785	7.74056e-05	0	18	-6.07526	0.00206196	4.26052e-05	0	19	-0.315073	0.395097	0.0907433	0	0	23	-3.91448	1.37075e-05	9.7632e-09	0	0	#N/A	#N/A	#N/A	#N/A	0	0		0	NULL		0	NULL		1	Elavl1		0		0		0
Elavl4	#N/A	#N/A	#N/A	#N/A	0	2	-6.03084	0.00729393	0.00106719	0	2	-4.84752	0.0288352	0.00885627	0	#N/A	#N/A	#N/A	#N/A	0	0	#N/A	#N/A	#N/A	#N/A	0	0	#N/A	#N/A	#N/A	#N/A	0	0		0	NULL		0	NULL		0	NULL		0		0		0
Eloa	#N/A	#N/A	#N/A	#N/A	0	2	4.00235	0.0440217	0.0170338	0	2	4.96688	0.0410865	0.0140598	0	2	-0.00213303	0.937518	0.842419	0	0	4	-0.479402	0.451693	0.23582	0	0	#N/A	#N/A	#N/A	#N/A	0	0		0	NULL		0	NULL		0	NULL		0		0		0
Elob	#N/A	#N/A	#N/A	#N/A	0	2	4.84272	0.00379845	0.000275387	0	2	5.86589	0.00301585	0.000138576	0	2	0.00033807	0.737366	0.48896	0	0	3	-0.492764	0.253636	0.0850871	0	0	#N/A	#N/A	#N/A	#N/A	0	0		0	NULL		0	NULL		0	NULL		0		0		0
Eloc	#N/A	#N/A	#N/A	#N/A	0	#N/A	#N/A	#N/A	#N/A	0	#N/A	#N/A	#N/A	#N/A	0	3	0.0720089	0.951412	0.867007	0	0	2	-0.0997141	0.672116	0.47897	0	0	#N/A	#N/A	#N/A	#N/A	0	0		0	NULL		0	NULL		0	NULL		0		0		0
Elovl5	#N/A	#N/A	#N/A	#N/A	0	#N/A	#N/A	#N/A	#N/A	0	#N/A	#N/A	#N/A	#N/A	0	3	-0.049261	0.934779	0.834945	0	0	2	0.62623	0.16077	0.034046	0	0	#N/A	#N/A	#N/A	#N/A	0	0		0	NULL		0	NULL		0	NULL		0		0		0
Elp2	#N/A	#N/A	#N/A	#N/A	0	#N/A	#N/A	#N/A	#N/A	0	#N/A	#N/A	#N/A	#N/A	0	#N/A	#N/A	#N/A	#N/A	0	0	#N/A	#N/A	#N/A	#N/A	0	0	#N/A	#N/A	#N/A	#N/A	0	0		0	NULL		0	NULL		0	NULL		0		0		0
Elp3	#N/A	#N/A	#N/A	#N/A	0	#N/A	#N/A	#N/A	#N/A	0	#N/A	#N/A	#N/A	#N/A	0	5	-0.0593808	0.903657	0.774105	0	0	6	0.0605122	0.859403	0.739377	0	0	#N/A	#N/A	#N/A	#N/A	0	0		0	NULL		0	NULL		0	NULL		0		0		0
Emc1	#N/A	#N/A	#N/A	#N/A	0	4	1.64513	0.358785	0.267679	0	4	3.81829	0.039226	0.013186	PD 5' UTR (vs AR RNA)	25	0.0509114	0.94299	0.853309	0	0	27	0.16138	0.552749	0.334392	0	0	26	-0.380664	0.673017	0.469237	0	0		0	NULL		1	Emc1		0	NULL		0		0		1	Emc1
Emc10	#N/A	#N/A	#N/A	#N/A	0	#N/A	#N/A	#N/A	#N/A	0	#N/A	#N/A	#N/A	#N/A	0	5	0.0344821	0.829782	0.634557	0	0	4	0.0464924	0.99278	0.987098	0	0	#N/A	#N/A	#N/A	#N/A	0	0		0	NULL		0	NULL		0	NULL		0		0		0
Emc2	#N/A	#N/A	#N/A	#N/A	0	#N/A	#N/A	#N/A	#N/A	0	#N/A	#N/A	#N/A	#N/A	0	14	0.117224	0.957671	0.874071	0	0	12	0.134719	0.367285	0.157918	0	0	#N/A	#N/A	#N/A	#N/A	0	0		0	NULL		0	NULL		0	NULL		0		0		0
Emc3	#N/A	#N/A	#N/A	#N/A	0	#N/A	#N/A	#N/A	#N/A	0	#N/A	#N/A	#N/A	#N/A	0	7	-0.0182382	0.924293	0.810376	0	0	8	0.0752432	0.939546	0.888177	0	0	#N/A	#N/A	#N/A	#N/A	0	0		0	NULL		0	NULL		0	NULL		0		0		0
Emc4	#N/A	#N/A	#N/A	#N/A	0	#N/A	#N/A	#N/A	#N/A	0	#N/A	#N/A	#N/A	#N/A	0	6	0.156831	0.60258	0.299957	0	0	6	0.289213	0.562885	0.350593	0	0	#N/A	#N/A	#N/A	#N/A	0	0		0	NULL		0	NULL		0	NULL		0		0		0
Emc7	#N/A	#N/A	#N/A	#N/A	0	#N/A	#N/A	#N/A	#N/A	0	#N/A	#N/A	#N/A	#N/A	0	9	0.00609991	0.995552	0.980205	0	0	5	0.0610577	0.951815	0.912495	0	0	#N/A	#N/A	#N/A	#N/A	0	0		0	NULL		0	NULL		0	NULL		0		0		0
Emc8	#N/A	#N/A	#N/A	#N/A	0	#N/A	#N/A	#N/A	#N/A	0	#N/A	#N/A	#N/A	#N/A	0	8	0.103266	0.677416	0.406257	0	0	9	0.0839804	0.711412	0.535079	0	0	#N/A	#N/A	#N/A	#N/A	0	0		0	NULL		0	NULL		0	NULL		0		0		0
Emd	#N/A	#N/A	#N/A	#N/A	0	#N/A	#N/A	#N/A	#N/A	0	#N/A	#N/A	#N/A	#N/A	0	5	-0.222535	0.388383	0.0865426	0	0	4	-0.33486	0.780143	0.630671	0	0	#N/A	#N/A	#N/A	#N/A	0	0		0	NULL		0	NULL		0	NULL		0		0		0
Emg1	#N/A	#N/A	#N/A	#N/A	0	3	0.54975	0.767353	0.709825	0	3	2.72881	0.0116622	0.00210892	0	#N/A	#N/A	#N/A	#N/A	0	0	#N/A	#N/A	#N/A	#N/A	0	0	#N/A	#N/A	#N/A	#N/A	0	0		0	NULL		0	NULL		0	NULL		0		0		0
Eml4	2	2.31027	0.00234011	0.00140125	0	#N/A	#N/A	#N/A	#N/A	0	#N/A	#N/A	#N/A	#N/A	0	#N/A	#N/A	#N/A	#N/A	0	0	2	0.0856588	0.417139	0.205658	0	0	#N/A	#N/A	#N/A	#N/A	0	0		0	NULL		0	NULL		0	NULL		0		0		0
Eno1	7	2.7258	0.0105916	0.0088816	0	27	-2.16967	0.0538954	0.0222229	0	27	-1.03706	0.525087	0.407129	0	#N/A	#N/A	#N/A	#N/A	0	0	#N/A	#N/A	#N/A	#N/A	0	0	#N/A	#N/A	#N/A	#N/A	0	0		0	NULL		0	NULL		0	NULL		0		0		0
Epb41l2	#N/A	#N/A	#N/A	#N/A	0	#N/A	#N/A	#N/A	#N/A	0	#N/A	#N/A	#N/A	#N/A	0	13	-0.109111	0.717547	0.44713	0	0	14	0.047565	0.592179	0.381711	0	0	#N/A	#N/A	#N/A	#N/A	0	0		0	NULL		0	NULL		0	NULL		0		0		0
Epb41l5	3	2.41035	0.00323685	0.0021644	0	#N/A	#N/A	#N/A	#N/A	0	#N/A	#N/A	#N/A	#N/A	0	#N/A	#N/A	#N/A	#N/A	0	0	#N/A	#N/A	#N/A	#N/A	0	0	#N/A	#N/A	#N/A	#N/A	0	0		0	NULL		0	NULL		0	NULL		0		0		0
Ephx1	#N/A	#N/A	#N/A	#N/A	0	#N/A	#N/A	#N/A	#N/A	0	#N/A	#N/A	#N/A	#N/A	0	10	-0.324017	0.363938	0.0754013	0	0	4	0.214908	0.550891	0.33234	0	0	#N/A	#N/A	#N/A	#N/A	0	0		0	NULL		0	NULL		0	NULL		0		0		0
Eprs	4	3.24455	0.000143983	4.57971e-05	Drosha IP	11	0.19665	0.633085	0.543519	0	11	-0.637596	0.362058	0.24429	0	70	-0.720211	0.0861616	0.00175462	0	0	68	-0.771551	0.021386	0.000738368	0	0	#N/A	#N/A	#N/A	#N/A	0	0		0	NULL		0	NULL		1	Eprs		0		0		0
Eps8	14	1.44949	0.0589679	0.055984	0	#N/A	#N/A	#N/A	#N/A	0	#N/A	#N/A	#N/A	#N/A	0	#N/A	#N/A	#N/A	#N/A	0	0	#N/A	#N/A	#N/A	#N/A	0	0	#N/A	#N/A	#N/A	#N/A	0	0		0	NULL		0	NULL		0	NULL		0		0		0
Erbin	2	3.20096	1.17483e-05	2.53366e-06	0	#N/A	#N/A	#N/A	#N/A	0	#N/A	#N/A	#N/A	#N/A	0	#N/A	#N/A	#N/A	#N/A	0	0	#N/A	#N/A	#N/A	#N/A	0	0	#N/A	#N/A	#N/A	#N/A	0	0		0	NULL		0	NULL		0	NULL		0		0		0
Ergic1	#N/A	#N/A	#N/A	#N/A	0	#N/A	#N/A	#N/A	#N/A	0	#N/A	#N/A	#N/A	#N/A	0	4	0.3878	0.581652	0.267037	0	0	3	0.263277	0.194787	0.0531364	0	0	#N/A	#N/A	#N/A	#N/A	0	0		0	NULL		0	NULL		0	NULL		0		0		0
Erh	5	4.45609	3.41386e-08	4.31873e-09	Drosha IP	3	-1.66681	0.109637	0.0604526	0	3	-4.67508	0.0116622	0.00214348	0	10	0.697153	0.436008	0.1228	0	0	10	-0.137744	0.96759	0.94209	0	0	#N/A	#N/A	#N/A	#N/A	0	0		0	NULL		0	NULL		1	Erh		0		0		0
Eri1	#N/A	#N/A	#N/A	#N/A	0	#N/A	#N/A	#N/A	#N/A	0	#N/A	#N/A	#N/A	#N/A	0	6	0.247352	0.531665	0.188366	0	0	4	0.0705146	0.927091	0.856212	0	0	#N/A	#N/A	#N/A	#N/A	0	0		0	NULL		0	NULL		0	NULL		0		0		0
Eri3	#N/A	#N/A	#N/A	#N/A	0	#N/A	#N/A	#N/A	#N/A	0	#N/A	#N/A	#N/A	#N/A	0	3	2.17637	0.106786	0.00336691	0	0	#N/A	#N/A	#N/A	#N/A	0	0	#N/A	#N/A	#N/A	#N/A	0	0		0	NULL		0	NULL		0	NULL		0		0		0
Erlin2	2	2.5937	0.00560744	0.00420896	0	#N/A	#N/A	#N/A	#N/A	0	#N/A	#N/A	#N/A	#N/A	0	16	-0.110995	0.723325	0.462096	0	0	13	0.211262	0.313667	0.122875	0	0	#N/A	#N/A	#N/A	#N/A	0	0		0	NULL		0	NULL		0	NULL		0		0		0
Ermp1	#N/A	#N/A	#N/A	#N/A	0	#N/A	#N/A	#N/A	#N/A	0	#N/A	#N/A	#N/A	#N/A	0	8	0.416722	0.204207	0.0145074	0	0	8	0.362498	0.302328	0.116065	0	0	#N/A	#N/A	#N/A	#N/A	0	0		0	NULL		0	NULL		0	NULL		0		0		0
Etfa	#N/A	#N/A	#N/A	#N/A	0	2	-0.665705	0.524108	0.426511	0	2	2.66667	0.295327	0.186004	0	7	0.147973	0.723325	0.461667	0	0	8	0.119682	0.454349	0.238501	0	0	#N/A	#N/A	#N/A	#N/A	0	0		0	NULL		0	NULL		0	NULL		0		0		0
Etfb	#N/A	#N/A	#N/A	#N/A	0	#N/A	#N/A	#N/A	#N/A	0	#N/A	#N/A	#N/A	#N/A	0	4	0.0598507	0.766332	0.54023	0	0	6	0.486885	0.0486194	0.00294349	0	0	#N/A	#N/A	#N/A	#N/A	0	0		0	NULL		0	NULL		0	NULL		0		0		0
Etfdh	#N/A	#N/A	#N/A	#N/A	0	#N/A	#N/A	#N/A	#N/A	0	#N/A	#N/A	#N/A	#N/A	0	4	0.767993	0.11354	0.00398905	0	0	6	0.519605	0.16077	0.034048	0	0	#N/A	#N/A	#N/A	#N/A	0	0		0	NULL		0	NULL		0	NULL		0		0		0
Evpl	#N/A	#N/A	#N/A	#N/A	0	#N/A	#N/A	#N/A	#N/A	0	#N/A	#N/A	#N/A	#N/A	0	#N/A	#N/A	#N/A	#N/A	0	0	2	-0.433132	0.783616	0.634037	0	0	#N/A	#N/A	#N/A	#N/A	0	0		0	NULL		0	NULL		0	NULL		0		0		0
Ewsr1	4	3.26919	0.000283202	0.000101339	Drosha IP	2	1.43349	0.0308687	0.00981676	0	2	-1.0048	0.171912	0.0933357	0	8	-0.0453656	0.834869	0.651778	0	0	4	0.723452	0.0787151	0.00687601	0	0	#N/A	#N/A	#N/A	#N/A	0	0		0	NULL		0	NULL		1	Ewsr1		0		0		0
Exoc4	#N/A	#N/A	#N/A	#N/A	0	#N/A	#N/A	#N/A	#N/A	0	#N/A	#N/A	#N/A	#N/A	0	3	0.135645	0.474582	0.149886	0	0	#N/A	#N/A	#N/A	#N/A	0	0	#N/A	#N/A	#N/A	#N/A	0	0		0	NULL		0	NULL		0	NULL		0		0		0
Exosc10	#N/A	#N/A	#N/A	#N/A	0	#N/A	#N/A	#N/A	#N/A	0	#N/A	#N/A	#N/A	#N/A	0	6	-0.162896	0.414894	0.104322	0	0	#N/A	#N/A	#N/A	#N/A	0	0	#N/A	#N/A	#N/A	#N/A	0	0		0	NULL		0	NULL		0	NULL		0		0		0
Fabp5	#N/A	#N/A	#N/A	#N/A	0	4	-0.787197	0.190668	0.122194	0	4	-2.48149	0.0713517	0.0301109	0	#N/A	#N/A	#N/A	#N/A	0	0	#N/A	#N/A	#N/A	#N/A	0	0	#N/A	#N/A	#N/A	#N/A	0	0		0	NULL		0	NULL		0	NULL		0		0		0
Fabp7	3	2.67988	0.00490222	0.00356957	0	5	-1.44174	0.0284629	0.00859252	0	5	-0.797124	0.238304	0.142925	0	#N/A	#N/A	#N/A	#N/A	0	0	#N/A	#N/A	#N/A	#N/A	0	0	#N/A	#N/A	#N/A	#N/A	0	0		0	NULL		0	NULL		0	NULL		0		0		0
Fads1	4	2.66104	0.00153481	0.000822881	0	#N/A	#N/A	#N/A	#N/A	0	#N/A	#N/A	#N/A	#N/A	0	12	0.011865	0.957944	0.878967	0	0	10	-0.00571166	0.940669	0.895279	0	0	#N/A	#N/A	#N/A	#N/A	0	0		0	NULL		0	NULL		0	NULL		0		0		0
Fads2	#N/A	#N/A	#N/A	#N/A	0	#N/A	#N/A	#N/A	#N/A	0	#N/A	#N/A	#N/A	#N/A	0	18	0.129451	0.60258	0.296543	0	0	14	0.195537	0.282422	0.103415	0	0	#N/A	#N/A	#N/A	#N/A	0	0		0	NULL		0	NULL		0	NULL		0		0		0
Faf2	#N/A	#N/A	#N/A	#N/A	0	#N/A	#N/A	#N/A	#N/A	0	#N/A	#N/A	#N/A	#N/A	0	2	-0.265741	0.559571	0.218424	0	0	5	-0.00486342	0.778002	0.628387	0	0	#N/A	#N/A	#N/A	#N/A	0	0		0	NULL		0	NULL		0	NULL		0		0		0
Fam111a	#N/A	#N/A	#N/A	#N/A	0	4	2.17605	0.0217468	0.00591659	PD 3' UTR (vs AR RNA)	4	0.199638	0.950165	0.920293	0	#N/A	#N/A	#N/A	#N/A	0	0	#N/A	#N/A	#N/A	#N/A	0	0	#N/A	#N/A	#N/A	#N/A	0	0		1	NULL		0	NULL		0	NULL		1	Fam111a	0		0
FAM120A	11	3.45249	2.00645e-05	4.52055e-06	Drosha IP	5	-0.693495	0.674776	0.590735	0	5	0.220426	0.809627	0.730329	0	38	0.185814	0.675701	0.40427	0	0	35	-0.625697	0.0343018	0.00172135	0	0	#N/A	#N/A	#N/A	#N/A	0	0		0	NULL		0	NULL		1	FAM120A		0		0		0
Fam120c	4	3.49358	5.62129e-06	1.10394e-06	Drosha IP	8	-1.96084	0.0322546	0.010975	0	8	-1.48204	0.07896	0.0347539	0	35	0.156241	0.740825	0.495145	0	0	32	-1.38507	0.00131827	1.63699e-05	0	0	#N/A	#N/A	#N/A	#N/A	0	0		0	NULL		0	NULL		1	Fam120c		0		0		0
Fam162a	#N/A	#N/A	#N/A	#N/A	0	#N/A	#N/A	#N/A	#N/A	0	#N/A	#N/A	#N/A	#N/A	0	3	-0.136986	0.559571	0.220142	0	0	4	0.244457	0.255799	0.0865419	0	0	#N/A	#N/A	#N/A	#N/A	0	0		0	NULL		0	NULL		0	NULL		0		0		0
Fam3c	#N/A	#N/A	#N/A	#N/A	0	#N/A	#N/A	#N/A	#N/A	0	#N/A	#N/A	#N/A	#N/A	0	2	-0.548604	0.354389	0.063906	0	0	2	-0.193346	0.510944	0.289703	0	0	#N/A	#N/A	#N/A	#N/A	0	0		0	NULL		0	NULL		0	NULL		0		0		0
Fam76b	#N/A	#N/A	#N/A	#N/A	0	#N/A	#N/A	#N/A	#N/A	0	#N/A	#N/A	#N/A	#N/A	0	5	-1.10098	0.0898958	0.00193414	0	0	3	-0.386797	0.877844	0.771033	0	0	#N/A	#N/A	#N/A	#N/A	0	0		0	NULL		0	NULL		0	NULL		0		0		0
Fam98a	#N/A	#N/A	#N/A	#N/A	0	5	1.18197	0.0589641	0.0253824	PD 3' UTR (vs AR RNA)	5	0.791952	0.203435	0.115124	0	7	0.518707	0.255358	0.0250102	0	0	4	-0.353221	0.473071	0.254057	0	0	6	1.30213	0.090428	0.00803821	0	0		1	NULL		0	NULL		0	NULL		1	Fam98a	0		0
Fam98b	#N/A	#N/A	#N/A	#N/A	0	6	-2.02238	0.0410405	0.0155329	0	6	-2.7592	0.019953	0.00510346	0	14	0.698453	0.209449	0.0185592	0	0	13	0.362733	0.148068	0.0277364	0	0	#N/A	#N/A	#N/A	#N/A	0	0		0	NULL		0	NULL		0	NULL		0		0		0
Farp1	3	2.56687	0.00306531	0.00200168	0	#N/A	#N/A	#N/A	#N/A	0	#N/A	#N/A	#N/A	#N/A	0	8	-0.0526374	0.718533	0.44848	0	0	8	0.238889	0.562885	0.348523	0	0	#N/A	#N/A	#N/A	#N/A	0	0		0	NULL		0	NULL		0	NULL		0		0		0
Farsa	#N/A	#N/A	#N/A	#N/A	0	6	2.0863	0.128908	0.074634	0	6	1.50173	0.409036	0.291255	0	8	0.164782	0.559571	0.219189	0	0	8	-0.126801	0.95251	0.914575	0	0	#N/A	#N/A	#N/A	#N/A	0	0		0	NULL		0	NULL		0	NULL		0		0		0
Farsb	#N/A	#N/A	#N/A	#N/A	0	9	-1.58675	0.0343652	0.0120922	0	9	-0.849651	0.180167	0.098471	0	9	-0.0549522	0.832211	0.647932	0	0	3	-0.0185557	0.63704	0.440574	0	0	#N/A	#N/A	#N/A	#N/A	0	0		0	NULL		0	NULL		0	NULL		0		0		0
Fasn	#N/A	#N/A	#N/A	#N/A	0	15	-1.17327	0.0772965	0.0374207	0	15	0.882151	0.397401	0.27919	0	33	-0.259273	0.594394	0.286018	0	0	31	-0.0301486	0.730847	0.563652	0	0	#N/A	#N/A	#N/A	#N/A	0	0		0	NULL		0	NULL		0	NULL		0		0		0
Fau	3	1.72775	0.0540929	0.0512254	0	4	1.87361	0.157252	0.0964046	0	4	-0.244045	0.62684	0.520725	0	6	0.535967	0.288626	0.0355938	0	0	6	0.418981	0.453386	0.23735	0	0	#N/A	#N/A	#N/A	#N/A	0	0		0	NULL		0	NULL		0	NULL		0		0		0
Fbl	9	2.34993	0.00411389	0.00283511	0	10	-0.513022	0.54129	0.443111	0	10	1.38316	0.0720601	0.0305842	PD 5' UTR (vs AR RNA)	18	0.222496	0.412337	0.0971302	0	0	17	0.113914	0.625582	0.427303	0	0	14	0.352374	0.169293	0.0307347	0	0		0	NULL		1	Fbl		0	NULL		0		0		1	Fbl
Fdps	#N/A	#N/A	#N/A	#N/A	0	7	-1.1675	0.0477547	0.0189149	0	7	-0.257814	0.584236	0.470497	0	#N/A	#N/A	#N/A	#N/A	0	0	#N/A	#N/A	#N/A	#N/A	0	0	#N/A	#N/A	#N/A	#N/A	0	0		0	NULL		0	NULL		0	NULL		0		0		0
Fen1	#N/A	#N/A	#N/A	#N/A	0	4	3.94265	0.0217468	0.00591649	PD 3' UTR (vs AR RNA)	4	1.98212	0.091474	0.0412573	PD 5' UTR (vs AR RNA)	8	0.0801886	0.869725	0.719112	0	0	10	0.354451	0.157791	0.0327046	0	0	6	-0.608449	0.108286	0.0118243	0	0		1	NULL		1	Fen1		0	NULL		0		1	Fen1	0
Fermt2	#N/A	#N/A	#N/A	#N/A	0	2	-0.124615	0.61205	0.52324	0	2	2.50938	0.157756	0.0840938	0	15	-0.342403	0.296082	0.0374316	0	0	8	-0.220863	0.26744	0.0933373	0	0	#N/A	#N/A	#N/A	#N/A	0	0		0	NULL		0	NULL		0	NULL		0		0		0
Fgd6	3	1.52283	0.045664	0.0429132	0	#N/A	#N/A	#N/A	#N/A	0	#N/A	#N/A	#N/A	#N/A	0	#N/A	#N/A	#N/A	#N/A	0	0	#N/A	#N/A	#N/A	#N/A	0	0	#N/A	#N/A	#N/A	#N/A	0	0		0	NULL		0	NULL		0	NULL		0		0		0
Fh	#N/A	#N/A	#N/A	#N/A	0	2	-0.834875	0.890292	0.855843	0	2	-1.02521	0.97884	0.971738	0	2	0.528662	0.560159	0.234196	0	0	#N/A	#N/A	#N/A	#N/A	0	0	#N/A	#N/A	#N/A	#N/A	0	0		0	NULL		0	NULL		0	NULL		0		0		0
Fip1l1	2	2.21025	0.00333929	0.00224493	0	#N/A	#N/A	#N/A	#N/A	0	#N/A	#N/A	#N/A	#N/A	0	2	0.469702	0.427874	0.119202	0	0	2	0.836071	0.109372	0.0143197	0	0	#N/A	#N/A	#N/A	#N/A	0	0		0	NULL		0	NULL		0	NULL		0		0		0
Fkbp3	#N/A	#N/A	#N/A	#N/A	0	5	3.05116	0.00615531	0.000736851	PD 3' UTR (vs AR RNA)	5	4.32402	0.00237846	8.0803e-05	PD 5' UTR (vs AR RNA)	7	0.620267	0.427025	0.118339	0	0	9	0.0200587	0.680268	0.488398	0	0	8	-0.322432	0.51025	0.273139	0	0		1	NULL		1	Fkbp3		0	NULL		0		1	Fkbp3	0
Fkbp4	#N/A	#N/A	#N/A	#N/A	0	#N/A	#N/A	#N/A	#N/A	0	#N/A	#N/A	#N/A	#N/A	0	#N/A	#N/A	#N/A	#N/A	0	0	#N/A	#N/A	#N/A	#N/A	0	0	#N/A	#N/A	#N/A	#N/A	0	0		0	NULL		0	NULL		0	NULL		0		0		0
Fkbp5	#N/A	#N/A	#N/A	#N/A	0	#N/A	#N/A	#N/A	#N/A	0	#N/A	#N/A	#N/A	#N/A	0	3	-0.429368	0.421786	0.112763	0	0	2	-0.162978	0.519304	0.300708	0	0	#N/A	#N/A	#N/A	#N/A	0	0		0	NULL		0	NULL		0	NULL		0		0		0
Fkbp8	#N/A	#N/A	#N/A	#N/A	0	#N/A	#N/A	#N/A	#N/A	0	#N/A	#N/A	#N/A	#N/A	0	8	-0.164308	0.436008	0.123024	0	0	9	0.179609	0.721401	0.547953	0	0	#N/A	#N/A	#N/A	#N/A	0	0		0	NULL		0	NULL		0	NULL		0		0		0
Flii	11	2.31275	0.00503104	0.00369751	0	#N/A	#N/A	#N/A	#N/A	0	#N/A	#N/A	#N/A	#N/A	0	4	-0.0788522	0.829782	0.637792	0	0	2	-0.0231879	0.934144	0.876259	0	0	#N/A	#N/A	#N/A	#N/A	0	0		0	NULL		0	NULL		0	NULL		0		0		0
Flna	28	2.72386	0.00106489	0.000501448	0	2	-5.75131	0.00327217	0.000182007	0	2	-5.91188	0.00413556	0.000285038	0	12	-0.269889	0.625701	0.3335	0	0	13	0.0640615	0.624123	0.425417	0	0	#N/A	#N/A	#N/A	#N/A	0	0		0	NULL		0	NULL		0	NULL		0		0		0
Flnb	7	3.35177	0.000691528	0.00029744	Drosha IP	#N/A	#N/A	#N/A	#N/A	0	#N/A	#N/A	#N/A	#N/A	0	#N/A	#N/A	#N/A	#N/A	0	0	#N/A	#N/A	#N/A	#N/A	0	0	#N/A	#N/A	#N/A	#N/A	0	0		0	NULL		0	NULL		1	Flnb		0		0		0
Flot1	3	1.97081	0.0432842	0.0405202	0	#N/A	#N/A	#N/A	#N/A	0	#N/A	#N/A	#N/A	#N/A	0	#N/A	#N/A	#N/A	#N/A	0	0	#N/A	#N/A	#N/A	#N/A	0	0	#N/A	#N/A	#N/A	#N/A	0	0		0	NULL		0	NULL		0	NULL		0		0		0
Flot2	6	0.422874	0.748253	0.744646	0	#N/A	#N/A	#N/A	#N/A	0	#N/A	#N/A	#N/A	#N/A	0	#N/A	#N/A	#N/A	#N/A	0	0	#N/A	#N/A	#N/A	#N/A	0	0	#N/A	#N/A	#N/A	#N/A	0	0		0	NULL		0	NULL		0	NULL		0		0		0
Fmnl2	2	2.67006	0.00180396	0.00100631	0	#N/A	#N/A	#N/A	#N/A	0	#N/A	#N/A	#N/A	#N/A	0	9	0.135796	0.560159	0.234559	0	0	10	0.0405086	0.897564	0.814456	0	0	#N/A	#N/A	#N/A	#N/A	0	0		0	NULL		0	NULL		0	NULL		0		0		0
Fmr1	3	3.1371	8.38084e-05	2.42338e-05	0	12	1.34784	0.0380955	0.0139286	PD 3' UTR (vs AR RNA)	12	2.98695	0.0054547	0.000468299	PD 5' UTR (vs AR RNA)	28	0.655787	0.413184	0.0979442	0	0	20	-0.635262	0.0434976	0.00241653	0	0	19	0.796289	0.0646097	0.00382987	0	0		1	NULL		1	Fmr1		0	NULL		0		1	Fmr1	0
Frg1	2	4.14346	7.40898e-07	1.16044e-07	0	2	4.07358	0.00379845	0.000272919	0	2	0.0939425	0.882129	0.823463	0	3	0.532798	0.288626	0.0355826	0	0	3	0.243035	0.272447	0.0956837	0	0	#N/A	#N/A	#N/A	#N/A	0	0		0	NULL		0	NULL		0	NULL		0		0		0
Frmd4a	3	2.91346	0.000910183	0.000413421	0	#N/A	#N/A	#N/A	#N/A	0	#N/A	#N/A	#N/A	#N/A	0	#N/A	#N/A	#N/A	#N/A	0	0	#N/A	#N/A	#N/A	#N/A	0	0	#N/A	#N/A	#N/A	#N/A	0	0		0	NULL		0	NULL		0	NULL		0		0		0
Fscn1	6	2.48937	0.0129883	0.0112849	0	7	-1.58551	0.105591	0.0574557	0	7	0.202772	0.923009	0.870783	0	#N/A	#N/A	#N/A	#N/A	0	0	#N/A	#N/A	#N/A	#N/A	0	0	#N/A	#N/A	#N/A	#N/A	0	0		0	NULL		0	NULL		0	NULL		0		0		0
Ftsj3	2	3.13131	6.26745e-05	1.73676e-05	0	2	3.59633	0.0122767	0.00234548	0	2	2.74323	0.0483659	0.0177858	0	#N/A	#N/A	#N/A	#N/A	0	0	#N/A	#N/A	#N/A	#N/A	0	0	#N/A	#N/A	#N/A	#N/A	0	0		0	NULL		0	NULL		0	NULL		0		0		0
Fubp1	#N/A	#N/A	#N/A	#N/A	0	13	-1.55545	0.0477401	0.018819	0	13	-1.91661	0.0200783	0.00521988	0	17	-0.0748043	0.559571	0.217684	0	0	18	0.148777	0.965252	0.935689	0	0	#N/A	#N/A	#N/A	#N/A	0	0		0	NULL		0	NULL		0	NULL		0		0		0
Fundc2	#N/A	#N/A	#N/A	#N/A	0	#N/A	#N/A	#N/A	#N/A	0	#N/A	#N/A	#N/A	#N/A	0	#N/A	#N/A	#N/A	#N/A	0	0	2	0.337873	0.143369	0.0262435	0	0	#N/A	#N/A	#N/A	#N/A	0	0		0	NULL		0	NULL		0	NULL		0		0		0
Fus	3	3.18441	0.00133578	0.00069042	0	8	0.394485	0.246141	0.166971	0	8	0.965014	0.170644	0.0918419	0	14	-0.215362	0.757554	0.523674	0	0	10	0.316128	0.457875	0.241656	0	0	#N/A	#N/A	#N/A	#N/A	0	0		0	NULL		0	NULL		0	NULL		0		0		0
Fut8	#N/A	#N/A	#N/A	#N/A	0	#N/A	#N/A	#N/A	#N/A	0	#N/A	#N/A	#N/A	#N/A	0	5	-0.247149	0.438796	0.126126	0	0	3	0.0138618	0.730888	0.564304	0	0	#N/A	#N/A	#N/A	#N/A	0	0		0	NULL		0	NULL		0	NULL		0		0		0
Fxr1	9	3.88257	2.03745e-05	4.66405e-06	Drosha IP	16	1.50935	0.154	0.0933397	0	16	2.8179	0.0273946	0.00828019	PD 5' UTR (vs AR RNA)	34	0.140671	0.628946	0.339003	0	0	32	-0.775628	0.0329414	0.00142429	0	0	33	0.900876	0.0270306	0.000732356	0	0		0	NULL		1	Fxr1		1	Fxr1		0		0		0
Fxr2	10	3.59304	2.5096e-05	6.01699e-06	Drosha IP	5	0.745371	0.384979	0.293739	0	5	1.86694	0.0539014	0.0205307	PD 5' UTR (vs AR RNA)	15	0.37002	0.502924	0.163359	0	0	12	-0.606075	0.0489805	0.00313977	0	0	15	0.809656	0.0359391	0.00110016	0	0		0	NULL		1	Fxr2		1	Fxr2		0		0		0
Fyn	2	1.14907	0.112691	0.108889	0	#N/A	#N/A	#N/A	#N/A	0	#N/A	#N/A	#N/A	#N/A	0	#N/A	#N/A	#N/A	#N/A	0	0	#N/A	#N/A	#N/A	#N/A	0	0	#N/A	#N/A	#N/A	#N/A	0	0		0	NULL		0	NULL		0	NULL		0		0		0
Fyttd1	10	5.96121	3.78603e-12	2.26029e-13	Drosha IP	#N/A	#N/A	#N/A	#N/A	0	#N/A	#N/A	#N/A	#N/A	0	14	0.373184	0.378047	0.0815658	0	0	5	-0.110831	0.449481	0.234345	0	0	#N/A	#N/A	#N/A	#N/A	0	0		0	NULL		0	NULL		1	Fyttd1		0		0		0
G3bp1	8	2.73417	0.00100121	0.000468037	0	8	0.661498	0.201273	0.12972	0	8	1.43928	0.0773986	0.0334987	PD 5' UTR (vs AR RNA)	19	-0.13972	0.96527	0.899364	0	0	14	-0.142388	0.383819	0.172294	0	0	15	0.549821	0.122959	0.0155465	0	0		0	NULL		1	G3bp1		0	NULL		0		0		1	G3bp1
G3bp2	4	2.67277	0.000362838	0.000135081	0	4	1.53155	0.0528661	0.0215345	PD 3' UTR (vs AR RNA)	4	0.929032	0.334741	0.219383	0	18	-0.183337	0.995273	0.97229	0	0	14	-0.148882	0.40675	0.195553	0	0	17	0.46651	0.120633	0.0150543	0	0		1	NULL		0	NULL		0	NULL		1	G3bp2	0		0
Gadd45gip1	#N/A	#N/A	#N/A	#N/A	0	#N/A	#N/A	#N/A	#N/A	0	#N/A	#N/A	#N/A	#N/A	0	#N/A	#N/A	#N/A	#N/A	0	0	2	0.196682	0.973439	0.9559	0	0	#N/A	#N/A	#N/A	#N/A	0	0		0	NULL		0	NULL		0	NULL		0		0		0
Ganab	#N/A	#N/A	#N/A	#N/A	0	5	-1.48049	0.0701172	0.0325142	0	5	-0.360622	0.54633	0.432043	0	#N/A	#N/A	#N/A	#N/A	0	0	#N/A	#N/A	#N/A	#N/A	0	0	#N/A	#N/A	#N/A	#N/A	0	0		0	NULL		0	NULL		0	NULL		0		0		0
Gapdh	5	1.43765	0.117537	0.113713	0	12	-1.77598	0.154349	0.094065	0	12	-0.995658	0.254812	0.155291	0	26	0.0858273	0.737366	0.489833	0	0	22	-0.351209	0.113076	0.0159673	0	0	#N/A	#N/A	#N/A	#N/A	0	0		0	NULL		0	NULL		0	NULL		0		0		0
Gar1	#N/A	#N/A	#N/A	#N/A	0	#N/A	#N/A	#N/A	#N/A	0	#N/A	#N/A	#N/A	#N/A	0	6	0.0921022	0.628946	0.338233	0	0	3	-0.217811	0.332406	0.135188	0	0	#N/A	#N/A	#N/A	#N/A	0	0		0	NULL		0	NULL		0	NULL		0		0		0
Gas2l1	4	2.35238	0.0129883	0.0112983	0	#N/A	#N/A	#N/A	#N/A	0	#N/A	#N/A	#N/A	#N/A	0	#N/A	#N/A	#N/A	#N/A	0	0	#N/A	#N/A	#N/A	#N/A	0	0	#N/A	#N/A	#N/A	#N/A	0	0		0	NULL		0	NULL		0	NULL		0		0		0
Gatad2a	6	3.39269	3.02922e-05	7.40881e-06	Drosha IP	#N/A	#N/A	#N/A	#N/A	0	#N/A	#N/A	#N/A	#N/A	0	2	0.147729	0.540157	0.201648	0	0	#N/A	#N/A	#N/A	#N/A	0	0	#N/A	#N/A	#N/A	#N/A	0	0		0	NULL		0	NULL		1	Gatad2a		0		0		0
Gatad2b	6	4.562	7.32847e-09	8.38801e-10	Drosha IP	#N/A	#N/A	#N/A	#N/A	0	#N/A	#N/A	#N/A	#N/A	0	9	-0.00743792	0.903657	0.763983	0	0	6	0.157513	0.402684	0.190022	0	0	#N/A	#N/A	#N/A	#N/A	0	0		0	NULL		0	NULL		1	Gatad2b		0		0		0
Gatm	#N/A	#N/A	#N/A	#N/A	0	6	-2.3553	0.0159983	0.00379396	0	6	-2.32629	0.0929067	0.0421897	0	#N/A	#N/A	#N/A	#N/A	0	0	#N/A	#N/A	#N/A	#N/A	0	0	#N/A	#N/A	#N/A	#N/A	0	0		0	NULL		0	NULL		0	NULL		0		0		0
Gbas	#N/A	#N/A	#N/A	#N/A	0	#N/A	#N/A	#N/A	#N/A	0	#N/A	#N/A	#N/A	#N/A	0	6	0.478636	0.3469	0.0570882	0	0	10	0.683596	0.0812064	0.00728775	0	0	#N/A	#N/A	#N/A	#N/A	0	0		0	NULL		0	NULL		0	NULL		0		0		0
Gcn1	#N/A	#N/A	#N/A	#N/A	0	3	2.04515	0.0164371	0.00398546	0	3	3.07505	0.0054547	0.00045678	0	37	-0.200506	0.510279	0.174922	0	0	34	-0.239257	0.282422	0.103303	0	0	#N/A	#N/A	#N/A	#N/A	0	0		0	NULL		0	NULL		0	NULL		0		0		0
Gdi2	#N/A	#N/A	#N/A	#N/A	0	4	-2.42867	0.278694	0.194445	0	4	0.596573	0.669087	0.568765	0	#N/A	#N/A	#N/A	#N/A	0	0	#N/A	#N/A	#N/A	#N/A	0	0	#N/A	#N/A	#N/A	#N/A	0	0		0	NULL		0	NULL		0	NULL		0		0		0
Gdpd1	#N/A	#N/A	#N/A	#N/A	0	#N/A	#N/A	#N/A	#N/A	0	#N/A	#N/A	#N/A	#N/A	0	2	-0.0721049	0.858475	0.701525	0	0	#N/A	#N/A	#N/A	#N/A	0	0	#N/A	#N/A	#N/A	#N/A	0	0		0	NULL		0	NULL		0	NULL		0		0		0
Gfap	45	2.39915	0.00374193	0.00254432	0	#N/A	#N/A	#N/A	#N/A	0	#N/A	#N/A	#N/A	#N/A	0	57	-0.0316523	0.741643	0.496885	0	0	55	0.0754449	0.589331	0.378788	0	0	#N/A	#N/A	#N/A	#N/A	0	0		0	NULL		0	NULL		0	NULL		0		0		0
Gigyf2	4	1.80906	0.0239203	0.0219029	0	#N/A	#N/A	#N/A	#N/A	0	#N/A	#N/A	#N/A	#N/A	0	#N/A	#N/A	#N/A	#N/A	0	0	#N/A	#N/A	#N/A	#N/A	0	0	#N/A	#N/A	#N/A	#N/A	0	0		0	NULL		0	NULL		0	NULL		0		0		0
Gja1	9	2.12111	0.0119232	0.0102424	0	#N/A	#N/A	#N/A	#N/A	0	#N/A	#N/A	#N/A	#N/A	0	#N/A	#N/A	#N/A	#N/A	0	0	#N/A	#N/A	#N/A	#N/A	0	0	#N/A	#N/A	#N/A	#N/A	0	0		0	NULL		0	NULL		0	NULL		0		0		0
Gldc	#N/A	#N/A	#N/A	#N/A	0	#N/A	#N/A	#N/A	#N/A	0	#N/A	#N/A	#N/A	#N/A	0	4	0.386784	0.50371	0.165878	0	0	9	0.0644467	0.74526	0.582301	0	0	#N/A	#N/A	#N/A	#N/A	0	0		0	NULL		0	NULL		0	NULL		0		0		0
Glg1	#N/A	#N/A	#N/A	#N/A	0	#N/A	#N/A	#N/A	#N/A	0	#N/A	#N/A	#N/A	#N/A	0	15	0.201272	0.737366	0.486261	0	0	12	-0.143653	0.686401	0.502578	0	0	#N/A	#N/A	#N/A	#N/A	0	0		0	NULL		0	NULL		0	NULL		0		0		0
Glipr2	2	2.25109	0.00515678	0.00380856	0	#N/A	#N/A	#N/A	#N/A	0	#N/A	#N/A	#N/A	#N/A	0	2	0.175809	0.60258	0.296689	0	0	2	0.100679	0.927091	0.858583	0	0	#N/A	#N/A	#N/A	#N/A	0	0		0	NULL		0	NULL		0	NULL		0		0		0
Glud1	#N/A	#N/A	#N/A	#N/A	0	7	-1.40062	0.0253012	0.00718957	0	7	-1.51287	0.0648834	0.0258121	0	29	0.417268	0.262671	0.0260993	0	0	31	0.464302	0.38022	0.165737	0	0	#N/A	#N/A	#N/A	#N/A	0	0		0	NULL		0	NULL		0	NULL		0		0		0
Glul	#N/A	#N/A	#N/A	#N/A	0	4	-0.616415	0.168038	0.104179	0	4	-1.05681	0.186955	0.103537	0	#N/A	#N/A	#N/A	#N/A	0	0	#N/A	#N/A	#N/A	#N/A	0	0	#N/A	#N/A	#N/A	#N/A	0	0		0	NULL		0	NULL		0	NULL		0		0		0
Glyr1	#N/A	#N/A	#N/A	#N/A	0	2	1.26656	0.0751979	0.0362805	0	2	3.22942	0.0130639	0.00260646	0	23	0.267838	0.671255	0.393159	0	0	18	-0.437291	0.080164	0.00708001	0	0	#N/A	#N/A	#N/A	#N/A	0	0		0	NULL		0	NULL		0	NULL		0		0		0
Gnai2	4	2.44147	0.00855358	0.00692402	0	7	-2.15004	0.0148921	0.00335359	0	7	-0.365711	0.571189	0.456005	0	18	-0.208253	0.829782	0.637244	0	0	17	0.36987	0.383334	0.169426	0	0	#N/A	#N/A	#N/A	#N/A	0	0		0	NULL		0	NULL		0	NULL		0		0		0
Gnas	2	2.28804	0.0119368	0.0102686	0	#N/A	#N/A	#N/A	#N/A	0	#N/A	#N/A	#N/A	#N/A	0	#N/A	#N/A	#N/A	#N/A	0	0	#N/A	#N/A	#N/A	#N/A	0	0	#N/A	#N/A	#N/A	#N/A	0	0		0	NULL		0	NULL		0	NULL		0		0		0
Gnb1	3	3.1981	0.000390631	0.000148722	0	#N/A	#N/A	#N/A	#N/A	0	#N/A	#N/A	#N/A	#N/A	0	#N/A	#N/A	#N/A	#N/A	0	0	#N/A	#N/A	#N/A	#N/A	0	0	#N/A	#N/A	#N/A	#N/A	0	0		0	NULL		0	NULL		0	NULL		0		0		0
Gnb2	#N/A	#N/A	#N/A	#N/A	0	2	-2.15518	0.00613919	0.000716634	0	2	-0.233889	0.451001	0.329934	0	3	-0.6339	0.209449	0.0171376	0	0	5	0.270254	0.628751	0.431259	0	0	#N/A	#N/A	#N/A	#N/A	0	0		0	NULL		0	NULL		0	NULL		0		0		0
Gng12	#N/A	#N/A	#N/A	#N/A	0	#N/A	#N/A	#N/A	#N/A	0	#N/A	#N/A	#N/A	#N/A	0	3	-0.747634	0.209449	0.0171695	0	0	4	0.477682	0.16077	0.0341723	0	0	#N/A	#N/A	#N/A	#N/A	0	0		0	NULL		0	NULL		0	NULL		0		0		0
Gng5	#N/A	#N/A	#N/A	#N/A	0	#N/A	#N/A	#N/A	#N/A	0	#N/A	#N/A	#N/A	#N/A	0	#N/A	#N/A	#N/A	#N/A	0	0	2	0.073089	0.801837	0.665342	0	0	#N/A	#N/A	#N/A	#N/A	0	0		0	NULL		0	NULL		0	NULL		0		0		0
Gnl2	#N/A	#N/A	#N/A	#N/A	0	2	-1.7982	0.128458	0.0739744	0	2	0.523733	0.358585	0.239779	0	#N/A	#N/A	#N/A	#N/A	0	0	2	-0.298279	0.558143	0.341883	0	0	#N/A	#N/A	#N/A	#N/A	0	0		0	NULL		0	NULL		0	NULL		0		0		0
Gnl3	#N/A	#N/A	#N/A	#N/A	0	3	0.84491	0.806035	0.757302	0	3	2.66627	0.29628	0.187011	0	#N/A	#N/A	#N/A	#N/A	0	0	4	0.670737	0.0380539	0.00198508	0	0	#N/A	#N/A	#N/A	#N/A	0	0		0	NULL		0	NULL		0	NULL		0		0		0
Gpc1	#N/A	#N/A	#N/A	#N/A	0	#N/A	#N/A	#N/A	#N/A	0	#N/A	#N/A	#N/A	#N/A	0	#N/A	#N/A	#N/A	#N/A	0	0	2	0.555333	0.412358	0.20148	0	0	#N/A	#N/A	#N/A	#N/A	0	0		0	NULL		0	NULL		0	NULL		0		0		0
Gpc4	#N/A	#N/A	#N/A	#N/A	0	#N/A	#N/A	#N/A	#N/A	0	#N/A	#N/A	#N/A	#N/A	0	#N/A	#N/A	#N/A	#N/A	0	0	3	0.588734	0.0562375	0.00392072	0	0	#N/A	#N/A	#N/A	#N/A	0	0		0	NULL		0	NULL		0	NULL		0		0		0
Gpd1	#N/A	#N/A	#N/A	#N/A	0	8	-0.602965	0.581041	0.489577	0	8	1.65317	0.14205	0.0743744	0	#N/A	#N/A	#N/A	#N/A	0	0	#N/A	#N/A	#N/A	#N/A	0	0	#N/A	#N/A	#N/A	#N/A	0	0		0	NULL		0	NULL		0	NULL		0		0		0
Gpd2	#N/A	#N/A	#N/A	#N/A	0	#N/A	#N/A	#N/A	#N/A	0	#N/A	#N/A	#N/A	#N/A	0	17	0.0625697	0.661261	0.375754	0	0	20	0.279395	0.37377	0.16186	0	0	#N/A	#N/A	#N/A	#N/A	0	0		0	NULL		0	NULL		0	NULL		0		0		0
Gpi	#N/A	#N/A	#N/A	#N/A	0	3	-3.96192	0.0110123	0.00198347	0	3	-1.37085	0.32343	0.209674	0	#N/A	#N/A	#N/A	#N/A	0	0	#N/A	#N/A	#N/A	#N/A	0	0	#N/A	#N/A	#N/A	#N/A	0	0		0	NULL		0	NULL		0	NULL		0		0		0
Gpnmb	#N/A	#N/A	#N/A	#N/A	0	#N/A	#N/A	#N/A	#N/A	0	#N/A	#N/A	#N/A	#N/A	0	2	0.68305	0.264287	0.0264931	0	0	2	0.34401	0.184581	0.0469341	0	0	#N/A	#N/A	#N/A	#N/A	0	0		0	NULL		0	NULL		0	NULL		0		0		0
Gpt2	#N/A	#N/A	#N/A	#N/A	0	#N/A	#N/A	#N/A	#N/A	0	#N/A	#N/A	#N/A	#N/A	0	4	0.336307	0.352007	0.0616619	0	0	5	0.443019	0.303673	0.116988	0	0	#N/A	#N/A	#N/A	#N/A	0	0		0	NULL		0	NULL		0	NULL		0		0		0
Gpx8	#N/A	#N/A	#N/A	#N/A	0	#N/A	#N/A	#N/A	#N/A	0	#N/A	#N/A	#N/A	#N/A	0	2	0.194456	0.997878	0.986547	0	0	#N/A	#N/A	#N/A	#N/A	0	0	#N/A	#N/A	#N/A	#N/A	0	0		0	NULL		0	NULL		0	NULL		0		0		0
Grm5	#N/A	#N/A	#N/A	#N/A	0	#N/A	#N/A	#N/A	#N/A	0	#N/A	#N/A	#N/A	#N/A	0	3	0.204026	0.722212	0.45883	0	0	3	0.392987	0.113216	0.0163832	0	0	#N/A	#N/A	#N/A	#N/A	0	0		0	NULL		0	NULL		0	NULL		0		0		0
Grn	2	-0.55131	0.401453	0.397099	0	#N/A	#N/A	#N/A	#N/A	0	#N/A	#N/A	#N/A	#N/A	0	#N/A	#N/A	#N/A	#N/A	0	0	#N/A	#N/A	#N/A	#N/A	0	0	#N/A	#N/A	#N/A	#N/A	0	0		0	NULL		0	NULL		0	NULL		0		0		0
Grsf1	#N/A	#N/A	#N/A	#N/A	0	#N/A	#N/A	#N/A	#N/A	0	#N/A	#N/A	#N/A	#N/A	0	#N/A	#N/A	#N/A	#N/A	0	0	2	0.362783	0.515211	0.296078	0	0	#N/A	#N/A	#N/A	#N/A	0	0		0	NULL		0	NULL		0	NULL		0		0		0
Grwd1	#N/A	#N/A	#N/A	#N/A	0	2	2.6472	0.00386003	0.000294053	0	2	4.34892	0.00206196	4.17971e-05	0	#N/A	#N/A	#N/A	#N/A	0	0	#N/A	#N/A	#N/A	#N/A	0	0	#N/A	#N/A	#N/A	#N/A	0	0		0	NULL		0	NULL		0	NULL		0		0		0
Gsk3b	3	3.84776	1.41653e-05	3.10612e-06	0	2	1.45552	0.250116	0.16997	0	2	3.66539	0.0100099	0.00168438	0	5	0.0275141	0.655913	0.365764	0	0	3	0.0534432	0.772691	0.619143	0	0	#N/A	#N/A	#N/A	#N/A	0	0		0	NULL		0	NULL		0	NULL		0		0		0
Gspt1	#N/A	#N/A	#N/A	#N/A	0	#N/A	#N/A	#N/A	#N/A	0	#N/A	#N/A	#N/A	#N/A	0	4	-0.0180288	0.674088	0.401465	0	0	2	0.27093	0.405192	0.193649	0	0	#N/A	#N/A	#N/A	#N/A	0	0		0	NULL		0	NULL		0	NULL		0		0		0
Gstm1	#N/A	#N/A	#N/A	#N/A	0	#N/A	#N/A	#N/A	#N/A	0	#N/A	#N/A	#N/A	#N/A	0	#N/A	#N/A	#N/A	#N/A	0	0	2	0.228406	0.40675	0.195419	0	0	#N/A	#N/A	#N/A	#N/A	0	0		0	NULL		0	NULL		0	NULL		0		0		0
Gstp1	#N/A	#N/A	#N/A	#N/A	0	#N/A	#N/A	#N/A	#N/A	0	#N/A	#N/A	#N/A	#N/A	0	3	-0.200902	0.995552	0.98124	0	0	2	0.331813	0.818023	0.683494	0	0	#N/A	#N/A	#N/A	#N/A	0	0		0	NULL		0	NULL		0	NULL		0		0		0
Gtdc1	#N/A	#N/A	#N/A	#N/A	0	2	-1.22132	0.615759	0.527155	0	2	-0.153525	0.773019	0.681416	0	#N/A	#N/A	#N/A	#N/A	0	0	#N/A	#N/A	#N/A	#N/A	0	0	#N/A	#N/A	#N/A	#N/A	0	0		0	NULL		0	NULL		0	NULL		0		0		0
Gtf2b	#N/A	#N/A	#N/A	#N/A	0	#N/A	#N/A	#N/A	#N/A	0	#N/A	#N/A	#N/A	#N/A	0	3	0.864035	0.314955	0.0435162	0	0	2	0.271581	0.168195	0.0390506	0	0	#N/A	#N/A	#N/A	#N/A	0	0		0	NULL		0	NULL		0	NULL		0		0		0
Gtf2e1	#N/A	#N/A	#N/A	#N/A	0	#N/A	#N/A	#N/A	#N/A	0	#N/A	#N/A	#N/A	#N/A	0	#N/A	#N/A	#N/A	#N/A	0	0	2	-0.340078	0.686401	0.499495	0	0	#N/A	#N/A	#N/A	#N/A	0	0		0	NULL		0	NULL		0	NULL		0		0		0
Gtf2e2	#N/A	#N/A	#N/A	#N/A	0	3	0.108379	0.724069	0.655777	0	3	1.03322	0.504419	0.384261	0	#N/A	#N/A	#N/A	#N/A	0	0	#N/A	#N/A	#N/A	#N/A	0	0	#N/A	#N/A	#N/A	#N/A	0	0		0	NULL		0	NULL		0	NULL		0		0		0
Gtf2f1	#N/A	#N/A	#N/A	#N/A	0	#N/A	#N/A	#N/A	#N/A	0	#N/A	#N/A	#N/A	#N/A	0	#N/A	#N/A	#N/A	#N/A	0	0	2	0.11309	0.486145	0.268003	0	0	#N/A	#N/A	#N/A	#N/A	0	0		0	NULL		0	NULL		0	NULL		0		0		0
Gtf2i	#N/A	#N/A	#N/A	#N/A	0	2	3.24083	0.20972	0.136179	0	2	0.365399	0.984723	0.97996	0	20	-0.0596139	0.848343	0.6851	0	0	23	0.190061	0.558143	0.341554	0	0	#N/A	#N/A	#N/A	#N/A	0	0		0	NULL		0	NULL		0	NULL		0		0		0
Gtf3c1	#N/A	#N/A	#N/A	#N/A	0	#N/A	#N/A	#N/A	#N/A	0	#N/A	#N/A	#N/A	#N/A	0	13	-0.3116	0.668539	0.3853	0	0	6	-0.00774558	0.786485	0.64252	0	0	#N/A	#N/A	#N/A	#N/A	0	0		0	NULL		0	NULL		0	NULL		0		0		0
Gtpbp1	#N/A	#N/A	#N/A	#N/A	0	12	1.75307	0.17666	0.110653	0	12	2.94457	0.0442831	0.0158498	PD 5' UTR (vs AR RNA)	7	0.0267378	0.903657	0.770047	0	0	6	0.149455	0.941351	0.89844	0	0	7	0.056296	0.629842	0.398693	0	0		0	NULL		1	Gtpbp1		0	NULL		0		0		1	Gtpbp1
Gtpbp2	#N/A	#N/A	#N/A	#N/A	0	#N/A	#N/A	#N/A	#N/A	0	#N/A	#N/A	#N/A	#N/A	0	#N/A	#N/A	#N/A	#N/A	0	0	#N/A	#N/A	#N/A	#N/A	0	0	#N/A	#N/A	#N/A	#N/A	0	0		0	NULL		0	NULL		0	NULL		0		0		0
Gtpbp4	2	2.44074	0.00819302	0.0065939	0	#N/A	#N/A	#N/A	#N/A	0	#N/A	#N/A	#N/A	#N/A	0	12	0.520283	0.363938	0.0743631	0	0	7	0.0274257	0.797052	0.655532	0	0	#N/A	#N/A	#N/A	#N/A	0	0		0	NULL		0	NULL		0	NULL		0		0		0
Guf1	#N/A	#N/A	#N/A	#N/A	0	#N/A	#N/A	#N/A	#N/A	0	#N/A	#N/A	#N/A	#N/A	0	#N/A	#N/A	#N/A	#N/A	0	0	3	0.0811191	0.7417	0.576095	0	0	#N/A	#N/A	#N/A	#N/A	0	0		0	NULL		0	NULL		0	NULL		0		0		0
H1f0	4	2.6634	0.0011614	0.000554116	0	4	2.17582	0.0127388	0.0025262	PD 3' UTR (vs AR RNA)	4	2.62597	0.00812922	0.00115008	PD 5' UTR (vs AR RNA)	9	0.0792202	0.769554	0.549865	0	0	9	0.230252	0.607172	0.400024	0	0	8	-0.277861	0.592228	0.351177	0	0		1	NULL		1	H1f0		0	NULL		0		1	H1f0	0
H2afj	#N/A	#N/A	#N/A	#N/A	0	#N/A	#N/A	#N/A	#N/A	0	#N/A	#N/A	#N/A	#N/A	0	9	0.184169	0.46839	0.146156	0	0	9	0.189362	0.360375	0.15375	0	0	#N/A	#N/A	#N/A	#N/A	0	0		0	NULL		0	NULL		0	NULL		0		0		0
H2afx	2	2.58661	0.00171543	0.000948651	0	6	-0.194319	0.397865	0.306457	0	6	0.693768	0.525869	0.408907	0	5	0.781932	0.330722	0.0511311	0	0	3	0.0534723	0.84436	0.718067	0	0	#N/A	#N/A	#N/A	#N/A	0	0		0	NULL		0	NULL		0	NULL		0		0		0
H2afy	4	2.73454	0.00200358	0.00114904	0	3	-0.217956	0.930834	0.915076	0	3	1.38133	0.171912	0.093186	0	12	0.0467882	0.623403	0.329621	0	0	12	0.0989489	0.397582	0.184279	0	0	#N/A	#N/A	#N/A	#N/A	0	0		0	NULL		0	NULL		0	NULL		0		0		0
H2afy2	#N/A	#N/A	#N/A	#N/A	0	#N/A	#N/A	#N/A	#N/A	0	#N/A	#N/A	#N/A	#N/A	0	6	0.397225	0.776218	0.565378	0	0	3	0.465719	0.164984	0.0370155	0	0	#N/A	#N/A	#N/A	#N/A	0	0		0	NULL		0	NULL		0	NULL		0		0		0
H2afz	#N/A	#N/A	#N/A	#N/A	0	2	-1.46574	0.0896242	0.0457333	0	2	0.845704	0.115017	0.0570216	0	2	-0.399239	0.760265	0.531849	0	0	3	-0.0256786	0.564253	0.354065	0	0	#N/A	#N/A	#N/A	#N/A	0	0		0	NULL		0	NULL		0	NULL		0		0		0
Hacd3	#N/A	#N/A	#N/A	#N/A	0	#N/A	#N/A	#N/A	#N/A	0	#N/A	#N/A	#N/A	#N/A	0	3	-0.375065	0.638779	0.349085	0	0	3	-0.273177	0.877844	0.771759	0	0	#N/A	#N/A	#N/A	#N/A	0	0		0	NULL		0	NULL		0	NULL		0		0		0
Hadha	5	1.90408	0.0238151	0.0217779	0	19	1.36085	0.211547	0.137876	0	19	2.0514	0.0322038	0.0103971	PD 5' UTR (vs AR RNA)	54	0.327801	0.274858	0.0305168	0	0	50	0.470538	0.0656078	0.00476638	0	0	51	0.0421769	0.999549	0.998697	0	0		0	NULL		1	Hadha		0	NULL		0		0		1	Hadha
Hadhb	#N/A	#N/A	#N/A	#N/A	0	9	1.05038	0.160866	0.0992041	0	9	1.67944	0.0709464	0.0298079	PD 5' UTR (vs AR RNA)	#N/A	#N/A	#N/A	#N/A	0	0	#N/A	#N/A	#N/A	#N/A	0	0	32	0.0665585	0.980705	0.940446	0	0		0	NULL		1	Hadhb		0	NULL		0		0		1	Hadhb
Hars	#N/A	#N/A	#N/A	#N/A	0	#N/A	#N/A	#N/A	#N/A	0	#N/A	#N/A	#N/A	#N/A	0	#N/A	#N/A	#N/A	#N/A	0	0	6	0.0960413	0.66172	0.466289	0	0	#N/A	#N/A	#N/A	#N/A	0	0		0	NULL		0	NULL		0	NULL		0		0		0
Hbs1l	#N/A	#N/A	#N/A	#N/A	0	4	1.3881	0.0271944	0.0080085	PD 3' UTR (vs AR RNA)	4	1.22645	0.0351188	0.0115081	PD 5' UTR (vs AR RNA)	#N/A	#N/A	#N/A	#N/A	0	0	3	0.0574212	0.619759	0.418535	0	0	#N/A	#N/A	#N/A	#N/A	0	0		1	NULL		1	Hbs1l		0	NULL		0		1	Hbs1l	0
Hcfc1	#N/A	#N/A	#N/A	#N/A	0	#N/A	#N/A	#N/A	#N/A	0	#N/A	#N/A	#N/A	#N/A	0	3	0.074851	0.671255	0.394282	0	0	6	0.233238	0.878692	0.774801	0	0	#N/A	#N/A	#N/A	#N/A	0	0		0	NULL		0	NULL		0	NULL		0		0		0
Hdac1	2	1.34661	0.0824261	0.0789503	0	#N/A	#N/A	#N/A	#N/A	0	#N/A	#N/A	#N/A	#N/A	0	6	0.0897648	0.684273	0.41563	0	0	5	-0.043802	0.750212	0.592582	0	0	#N/A	#N/A	#N/A	#N/A	0	0		0	NULL		0	NULL		0	NULL		0		0		0
Hdac2	#N/A	#N/A	#N/A	#N/A	0	#N/A	#N/A	#N/A	#N/A	0	#N/A	#N/A	#N/A	#N/A	0	2	0.325565	0.723325	0.465081	0	0	#N/A	#N/A	#N/A	#N/A	0	0	#N/A	#N/A	#N/A	#N/A	0	0		0	NULL		0	NULL		0	NULL		0		0		0
Hdgf	#N/A	#N/A	#N/A	#N/A	0	3	1.23775	0.462804	0.368789	0	3	1.65783	0.238241	0.142327	0	#N/A	#N/A	#N/A	#N/A	0	0	3	0.720038	0.0908348	0.0093736	0	0	#N/A	#N/A	#N/A	#N/A	0	0		0	NULL		0	NULL		0	NULL		0		0		0
Hdgfrp2	#N/A	#N/A	#N/A	#N/A	0	#N/A	#N/A	#N/A	#N/A	0	#N/A	#N/A	#N/A	#N/A	0	9	0.207529	0.442294	0.12776	0	0	7	0.219802	0.218327	0.0653114	0	0	#N/A	#N/A	#N/A	#N/A	0	0		0	NULL		0	NULL		0	NULL		0		0		0
Hdlbp	5	2.95116	0.000753302	0.000326733	0	22	-3.48394	0.00271157	0.000114758	0	22	-2.45585	0.00691862	0.000870057	0	56	-1.83266	0.00162029	2.72033e-06	0	0	58	-1.27358	0.00131827	1.69009e-05	0	0	#N/A	#N/A	#N/A	#N/A	0	0		0	NULL		0	NULL		0	NULL		0		0		0
Hepacam	4	2.68747	0.00124373	0.00060688	0	#N/A	#N/A	#N/A	#N/A	0	#N/A	#N/A	#N/A	#N/A	0	6	0.0761325	0.799809	0.596593	0	0	8	0.597715	0.0613941	0.00441653	0	0	#N/A	#N/A	#N/A	#N/A	0	0		0	NULL		0	NULL		0	NULL		0		0		0
Hexa	#N/A	#N/A	#N/A	#N/A	0	#N/A	#N/A	#N/A	#N/A	0	#N/A	#N/A	#N/A	#N/A	0	4	-0.114429	0.829782	0.639593	0	0	5	0.181218	0.561262	0.344692	0	0	#N/A	#N/A	#N/A	#N/A	0	0		0	NULL		0	NULL		0	NULL		0		0		0
Hexb	#N/A	#N/A	#N/A	#N/A	0	#N/A	#N/A	#N/A	#N/A	0	#N/A	#N/A	#N/A	#N/A	0	6	0.456756	0.540157	0.198319	0	0	10	0.370073	0.14669	0.0271716	0	0	#N/A	#N/A	#N/A	#N/A	0	0		0	NULL		0	NULL		0	NULL		0		0		0
Hint1	#N/A	#N/A	#N/A	#N/A	0	4	-1.41343	0.030988	0.00989218	0	4	-0.990043	0.328544	0.214527	0	#N/A	#N/A	#N/A	#N/A	0	0	#N/A	#N/A	#N/A	#N/A	0	0	#N/A	#N/A	#N/A	#N/A	0	0		0	NULL		0	NULL		0	NULL		0		0		0
Hip1	3	3.1222	0.000426995	0.000166168	0	3	-0.905071	0.112294	0.0621892	0	3	-0.39616	0.512937	0.392481	0	14	-0.163403	0.391112	0.0879934	0	0	15	0.00929245	0.892834	0.803169	0	0	#N/A	#N/A	#N/A	#N/A	0	0		0	NULL		0	NULL		0	NULL		0		0		0
Hist1h1a	7	2.61592	0.00315635	0.00209536	0	6	2.85627	0.0048836	0.000501942	PD 3' UTR (vs AR RNA)	6	2.88284	0.00829097	0.00120063	PD 5' UTR (vs AR RNA)	6	-0.251933	0.505626	0.167226	0	0	7	0.270914	0.672116	0.480317	0	0	8	0.24003	0.299015	0.0928703	0	0		1	NULL		1	Hist1h1a		0	NULL		0		1	Hist1h1a	0
Hist1h1b	10	2.40874	0.00494285	0.00361483	0	5	3.03934	0.0307623	0.00974575	PD 3' UTR (vs AR RNA)	5	1.92059	0.0852374	0.0378339	PD 5' UTR (vs AR RNA)	14	-0.249255	0.896364	0.753862	0	0	14	0.314513	0.198389	0.0555032	0	0	13	-0.0729752	0.983407	0.946499	0	0		1	NULL		1	Hist1h1b		0	NULL		0		1	Hist1h1b	0
Hist1h1c	19	2.51024	0.00258501	0.00160395	0	2	-5.25007	0.520506	0.422951	0	2	-6.29598	0.756961	0.662684	0	25	-0.114913	0.810345	0.606999	0	0	21	0.283712	0.255799	0.0868355	0	0	#N/A	#N/A	#N/A	#N/A	0	0		0	NULL		0	NULL		0	NULL		0		0		0
Hist1h1d	2	2.54242	0.00483778	0.00351131	0	14	1.4644	0.132196	0.076888	0	14	0.520937	0.386332	0.268143	0	3	-0.157727	0.559571	0.215293	0	0	3	0.283667	0.213234	0.0619655	0	0	#N/A	#N/A	#N/A	#N/A	0	0		0	NULL		0	NULL		0	NULL		0		0		0
Hist1h1e	6	2.45214	0.00452602	0.00323114	0	3	3.63086	0.0137669	0.00291318	0	3	1.83688	0.0430624	0.0153608	0	9	-0.244319	0.776218	0.566325	0	0	7	0.422737	0.156899	0.0316836	0	0	#N/A	#N/A	#N/A	#N/A	0	0		0	NULL		0	NULL		0	NULL		0		0		0
Hist1h2ab	#N/A	#N/A	#N/A	#N/A	0	3	-0.346059	0.386497	0.295364	0	3	0.812027	0.117429	0.0590693	0	#N/A	#N/A	#N/A	#N/A	0	0	#N/A	#N/A	#N/A	#N/A	0	0	#N/A	#N/A	#N/A	#N/A	0	0		0	NULL		0	NULL		0	NULL		0		0		0
Hist1h2bc	#N/A	#N/A	#N/A	#N/A	0	#N/A	#N/A	#N/A	#N/A	0	#N/A	#N/A	#N/A	#N/A	0	12	0.375026	0.298274	0.0387396	0	0	#N/A	#N/A	#N/A	#N/A	0	0	#N/A	#N/A	#N/A	#N/A	0	0		0	NULL		0	NULL		0	NULL		0		0		0
Hist1h2bm	12	2.4573	0.00313059	0.00206694	0	#N/A	#N/A	#N/A	#N/A	0	#N/A	#N/A	#N/A	#N/A	0	#N/A	#N/A	#N/A	#N/A	0	0	#N/A	#N/A	#N/A	#N/A	0	0	#N/A	#N/A	#N/A	#N/A	0	0		0	NULL		0	NULL		0	NULL		0		0		0
Hist1h2bp	#N/A	#N/A	#N/A	#N/A	0	11	2.16875	0.0705857	0.0330929	PD 3' UTR (vs AR RNA)	11	3.30557	0.00903694	0.00143904	PD 5' UTR (vs AR RNA)	#N/A	#N/A	#N/A	#N/A	0	0	#N/A	#N/A	#N/A	#N/A	0	0	12	-0.15636	0.846751	0.707711	0	0		1	NULL		1	Hist1h2bp		0	NULL		0		1	Hist1h2bp	0
Hist1h3a	8	1.91093	0.0113189	0.00960064	0	#N/A	#N/A	#N/A	#N/A	0	#N/A	#N/A	#N/A	#N/A	0	11	0.0301629	0.642118	0.352276	0	0	8	0.36587	0.267552	0.0936688	0	0	#N/A	#N/A	#N/A	#N/A	0	0		0	NULL		0	NULL		0	NULL		0		0		0
Hist1h3b	#N/A	#N/A	#N/A	#N/A	0	2	-2.98295	0.0609412	0.0268967	0	2	3.26453	0.381482	0.262471	0	#N/A	#N/A	#N/A	#N/A	0	0	#N/A	#N/A	#N/A	#N/A	0	0	#N/A	#N/A	#N/A	#N/A	0	0		0	NULL		0	NULL		0	NULL		0		0		0
Hist1h4a	10	2.17327	0.00707027	0.00556254	0	13	-0.981638	0.105591	0.0573465	0	13	0.141246	0.902761	0.843814	0	14	0.246533	0.361235	0.0710504	0	0	15	0.294163	0.203522	0.0579835	0	0	#N/A	#N/A	#N/A	#N/A	0	0		0	NULL		0	NULL		0	NULL		0		0		0
Hist2h2aa1	#N/A	#N/A	#N/A	#N/A	0	#N/A	#N/A	#N/A	#N/A	0	#N/A	#N/A	#N/A	#N/A	0	2	-0.252227	0.916157	0.793011	0	0	2	0.15606	0.721401	0.549453	0	0	#N/A	#N/A	#N/A	#N/A	0	0		0	NULL		0	NULL		0	NULL		0		0		0
Hist2h2ac	2	3.72779	0.00319528	0.00213276	0	2	-0.399794	0.925785	0.906754	0	2	0.94404	0.0727827	0.0309789	0	#N/A	#N/A	#N/A	#N/A	0	0	#N/A	#N/A	#N/A	#N/A	0	0	#N/A	#N/A	#N/A	#N/A	0	0		0	NULL		0	NULL		0	NULL		0		0		0
Hist2h2bb	#N/A	#N/A	#N/A	#N/A	0	#N/A	#N/A	#N/A	#N/A	0	#N/A	#N/A	#N/A	#N/A	0	#N/A	#N/A	#N/A	#N/A	0	0	10	0.419809	0.23732	0.0767403	0	0	#N/A	#N/A	#N/A	#N/A	0	0		0	NULL		0	NULL		0	NULL		0		0		0
Hist3h2a	8	2.09879	0.0131873	0.0114873	0	#N/A	#N/A	#N/A	#N/A	0	#N/A	#N/A	#N/A	#N/A	0	#N/A	#N/A	#N/A	#N/A	0	0	#N/A	#N/A	#N/A	#N/A	0	0	#N/A	#N/A	#N/A	#N/A	0	0		0	NULL		0	NULL		0	NULL		0		0		0
Hk1	#N/A	#N/A	#N/A	#N/A	0	2	-1.90308	0.560051	0.464564	0	2	-3.06752	0.391355	0.273995	0	#N/A	#N/A	#N/A	#N/A	0	0	#N/A	#N/A	#N/A	#N/A	0	0	#N/A	#N/A	#N/A	#N/A	0	0		0	NULL		0	NULL		0	NULL		0		0		0
Hmbox1	2	6.71848	4.18112e-18	7.05249e-20	0	#N/A	#N/A	#N/A	#N/A	0	#N/A	#N/A	#N/A	#N/A	0	#N/A	#N/A	#N/A	#N/A	0	0	#N/A	#N/A	#N/A	#N/A	0	0	#N/A	#N/A	#N/A	#N/A	0	0		0	NULL		0	NULL		0	NULL		0		0		0
Hmga1	3	1.88914	0.016817	0.015034	0	#N/A	#N/A	#N/A	#N/A	0	#N/A	#N/A	#N/A	#N/A	0	5	-0.0590898	0.970329	0.92204	0	0	6	0.522381	0.0819351	0.00756	0	0	#N/A	#N/A	#N/A	#N/A	0	0		0	NULL		0	NULL		0	NULL		0		0		0
Hmga2	2	2.27855	0.00458667	0.00328804	0	#N/A	#N/A	#N/A	#N/A	0	#N/A	#N/A	#N/A	#N/A	0	2	-0.558177	0.969637	0.91844	0	0	#N/A	#N/A	#N/A	#N/A	0	0	#N/A	#N/A	#N/A	#N/A	0	0		0	NULL		0	NULL		0	NULL		0		0		0
Hmgb1	#N/A	#N/A	#N/A	#N/A	0	11	0.947508	0.0994955	0.0534172	0	11	1.69449	0.0684946	0.0284911	PD 5' UTR (vs AR RNA)	13	-0.0201661	0.998278	0.990047	0	0	19	0.612104	0.0434976	0.00240654	0	0	12	-0.724798	0.0709759	0.00442871	0	0		0	NULL		1	Hmgb1		0	NULL		0		0		1	Hmgb1
Hmgb2	#N/A	#N/A	#N/A	#N/A	0	8	-0.405946	0.951876	0.940366	0	8	-2.11511	0.204945	0.11645	0	18	0.0546507	0.740825	0.495811	0	0	13	0.73923	0.0380539	0.00200569	0	0	#N/A	#N/A	#N/A	#N/A	0	0		0	NULL		0	NULL		0	NULL		0		0		0
Hmgb3	#N/A	#N/A	#N/A	#N/A	0	5	1.90925	0.0110123	0.00200598	PD 3' UTR (vs AR RNA)	5	2.33704	0.0172443	0.00400902	PD 5' UTR (vs AR RNA)	6	0.360058	0.349073	0.0595512	0	0	6	0.795839	0.0173345	0.000530901	0	0	7	-0.560625	0.247006	0.0658373	0	0		1	NULL		1	Hmgb3		0	NULL		0		1	Hmgb3	0
Hmgcr	2	3.81812	1.13759e-05	2.42595e-06	0	#N/A	#N/A	#N/A	#N/A	0	#N/A	#N/A	#N/A	#N/A	0	#N/A	#N/A	#N/A	#N/A	0	0	#N/A	#N/A	#N/A	#N/A	0	0	#N/A	#N/A	#N/A	#N/A	0	0		0	NULL		0	NULL		0	NULL		0		0		0
Hmgcs1	#N/A	#N/A	#N/A	#N/A	0	5	-1.03587	0.168038	0.104236	0	5	0.687791	0.680161	0.584758	0	#N/A	#N/A	#N/A	#N/A	0	0	#N/A	#N/A	#N/A	#N/A	0	0	#N/A	#N/A	#N/A	#N/A	0	0		0	NULL		0	NULL		0	NULL		0		0		0
Hmgn1	8	2.19203	0.0128289	0.0110978	0	2	0.752094	0.261674	0.179723	0	2	-2.14479	0.437111	0.315545	0	9	0.256843	0.540157	0.198849	0	0	8	0.696364	0.0544865	0.00360915	0	0	#N/A	#N/A	#N/A	#N/A	0	0		0	NULL		0	NULL		0	NULL		0		0		0
Hmgn2	6	2.41225	0.00430145	0.00300065	0	#N/A	#N/A	#N/A	#N/A	0	#N/A	#N/A	#N/A	#N/A	0	11	-0.0245041	0.957732	0.875033	0	0	10	0.562444	0.441621	0.227102	0	0	#N/A	#N/A	#N/A	#N/A	0	0		0	NULL		0	NULL		0	NULL		0		0		0
Hmox2	#N/A	#N/A	#N/A	#N/A	0	#N/A	#N/A	#N/A	#N/A	0	#N/A	#N/A	#N/A	#N/A	0	5	-0.051903	0.608459	0.308136	0	0	#N/A	#N/A	#N/A	#N/A	0	0	#N/A	#N/A	#N/A	#N/A	0	0		0	NULL		0	NULL		0	NULL		0		0		0
Hnrnpa0	7	3.73707	8.65447e-06	1.82474e-06	Drosha IP	22	1.86573	0.0255297	0.00736879	PD 3' UTR (vs AR RNA)	22	2.51832	0.0138986	0.0029118	PD 5' UTR (vs AR RNA)	28	0.544306	0.168613	0.00861321	0	0	24	-0.00295112	0.801837	0.664902	0	0	25	1.17818	0.0191747	0.000439666	0	0		1	NULL		1	Hnrnpa0		1	Hnrnpa0		0		0		0
Hnrnpa1	13	3.61775	5.96629e-06	1.18607e-06	Drosha IP	23	1.07899	0.0897976	0.0459303	PD 3' UTR (vs AR RNA)	23	2.28618	0.0119816	0.00224545	PD 5' UTR (vs AR RNA)	41	0.502367	0.305996	0.0416823	0	0	32	0.813856	0.021386	0.000709685	0	0	39	0.797797	0.0359391	0.00131277	0	0		1	NULL		1	Hnrnpa1		1	Hnrnpa1		0		0		0
Hnrnpa2b1	17	3.75035	8.82847e-07	1.41468e-07	Drosha IP	37	2.24214	0.0149834	0.00340615	PD 3' UTR (vs AR RNA)	37	2.74438	0.0078141	0.00108071	PD 5' UTR (vs AR RNA)	44	0.524837	0.464504	0.13978	0	0	38	1.06126	0.00752466	0.000150064	0	0	45	1.52734	0.0170191	0.000293433	0	0		1	NULL		1	Hnrnpa2b1		1	Hnrnpa2b1		0		0		0
Hnrnpa3	16	3.79664	7.01593e-06	1.42854e-06	Drosha IP	33	1.91525	0.00926455	0.00155716	PD 3' UTR (vs AR RNA)	33	3.29101	0.00406058	0.000274961	PD 5' UTR (vs AR RNA)	42	0.574362	0.352007	0.0613217	0	0	36	0.783169	0.00891831	0.000209618	0	0	41	1.14085	0.0191747	0.00041779	0	0		1	NULL		1	Hnrnpa3		1	Hnrnpa3		0		0		0
Hnrnpab	4	3.55071	2.2287e-05	5.15555e-06	Drosha IP	32	0.558353	0.61103	0.520154	0	32	1.13645	0.376237	0.256382	0	29	1.29472	0.209449	0.0168736	0	0	24	0.280917	0.510944	0.289955	0	0	#N/A	#N/A	#N/A	#N/A	0	0		0	NULL		0	NULL		1	Hnrnpab		0		0		0
Hnrnpc	13	4.40706	1.32359e-08	1.59469e-09	Drosha IP	13	-3.30405	0.00236785	7.51592e-05	0	13	-4.00894	0.00206196	4.19643e-05	0	23	-0.112807	0.757638	0.525239	0	0	25	-1.94871	0.000664656	4.39639e-06	0	0	#N/A	#N/A	#N/A	#N/A	0	0		0	NULL		0	NULL		1	Hnrnpc		0		0		0
Hnrnpd	6	3.8978	1.85673e-06	3.22132e-07	Drosha IP	14	-2.11858	0.0167133	0.00412276	0	14	-1.60962	0.0554523	0.0214568	0	36	0.898728	0.168613	0.00909953	0	0	26	-0.0688684	0.522384	0.304723	0	0	#N/A	#N/A	#N/A	#N/A	0	0		0	NULL		0	NULL		1	Hnrnpd		0		0		0
Hnrnpdl	3	3.79015	6.22348e-06	1.25063e-06	0	18	1.22697	0.0528661	0.0214515	PD 3' UTR (vs AR RNA)	18	0.314542	0.7625	0.670021	0	23	0.913031	0.209449	0.0166234	0	0	18	0.193054	0.186926	0.0483292	0	0	19	1.51725	0.034185	0.000996095	0	0		1	NULL		0	NULL		0	NULL		1	Hnrnpdl	0		0
Hnrnpf	6	4.16716	3.23289e-06	5.95943e-07	Drosha IP	10	-1.56178	0.0201946	0.00534777	0	10	0.826387	0.19138	0.107145	0	16	-0.0457018	0.722212	0.458075	0	0	14	0.264431	0.16077	0.0342706	0	0	#N/A	#N/A	#N/A	#N/A	0	0		0	NULL		0	NULL		1	Hnrnpf		0		0		0
Hnrnph1	5	3.97454	6.22348e-06	1.25219e-06	Drosha IP	12	-2.47853	0.00813041	0.00127806	0	12	-0.378239	0.880312	0.820702	0	20	-0.0545944	0.755592	0.52071	0	0	22	0.39667	0.0680732	0.00502826	0	0	#N/A	#N/A	#N/A	#N/A	0	0		0	NULL		0	NULL		1	Hnrnph1		0		0		0
Hnrnph2	#N/A	#N/A	#N/A	#N/A	0	5	0.149462	0.42644	0.334655	0	5	2.03769	0.0586293	0.0231114	PD 5' UTR (vs AR RNA)	7	0.238591	0.565457	0.245284	0	0	8	0.349982	0.344878	0.142225	0	0	7	-0.671313	0.471193	0.235105	0	0		0	NULL		1	Hnrnph2		0	NULL		0		0		1	Hnrnph2
Hnrnpk	13	4.08471	1.39035e-06	2.32841e-07	Drosha IP	33	-5.0688	0.000743075	1.0943e-05	0	33	-3.71807	0.0026447	0.000115126	0	37	-1.83001	0.00240162	6.81795e-06	0	0	34	-1.40826	0.000664656	5.07502e-06	0	0	#N/A	#N/A	#N/A	#N/A	0	0		0	NULL		0	NULL		1	Hnrnpk		0		0		0
Hnrnpl	13	5.00497	3.29313e-10	2.93604e-11	Drosha IP	24	2.7998	0.00713266	0.00103497	PD 3' UTR (vs AR RNA)	24	0.932498	0.12782	0.0653782	0	49	0.277705	0.365639	0.0768127	0	0	22	0.292396	0.218975	0.0659738	0	0	45	2.45707	0.00520982	4.27736e-06	0	0		1	NULL		0	NULL		1	Hnrnpl		0		0		0
Hnrnpll	2	4.41471	1.28534e-07	1.79638e-08	0	8	1.61123	0.0334143	0.0115817	PD 3' UTR (vs AR RNA)	8	1.50868	0.0262396	0.00767833	PD 5' UTR (vs AR RNA)	21	-0.507953	0.13899	0.0067078	0	0	20	-0.270658	0.19513	0.0537164	0	0	22	0.448957	0.168348	0.0285446	0	0		1	NULL		1	Hnrnpll		0	NULL		0		1	Hnrnpll	0
Hnrnpm	23	3.79909	4.47283e-06	8.7301e-07	Drosha IP	21	-1.01507	0.0602591	0.026433	0	21	0.545015	0.473458	0.3554	0	55	-0.138263	0.608892	0.313722	0	0	62	-0.530916	0.0343018	0.00173464	0	0	#N/A	#N/A	#N/A	#N/A	0	0		0	NULL		0	NULL		1	Hnrnpm		0		0		0
Hnrnpu	25	3.08213	0.000257056	8.91953e-05	Drosha IP	42	1.33901	0.0316112	0.010216	PD 3' UTR (vs AR RNA)	42	1.4229	0.069642	0.0290526	PD 5' UTR (vs AR RNA)	65	0.343784	0.343884	0.0561344	0	0	58	0.101853	0.489513	0.271269	0	0	66	0.630007	0.074655	0.00514862	0	0		1	NULL		1	Hnrnpu		1	Hnrnpu		0		0		0
Hnrnpul1	#N/A	#N/A	#N/A	#N/A	0	3	-0.912264	0.132196	0.0768091	0	3	0.366978	0.931338	0.887418	0	25	0.304128	0.438517	0.125243	0	0	23	0.00667342	0.919448	0.843464	0	0	#N/A	#N/A	#N/A	#N/A	0	0		0	NULL		0	NULL		0	NULL		0		0		0
Hnrnpul2	7	3.58771	1.18017e-06	1.96221e-07	Drosha IP	8	-0.186526	0.874213	0.836158	0	8	-0.119861	0.481469	0.362703	0	39	-0.145261	0.848343	0.683136	0	0	27	0.0789275	0.96759	0.941828	0	0	#N/A	#N/A	#N/A	#N/A	0	0		0	NULL		0	NULL		1	Hnrnpul2		0		0		0
Hp1bp3	#N/A	#N/A	#N/A	#N/A	0	4	1.62892	0.0322546	0.0107316	PD 3' UTR (vs AR RNA)	4	3.41844	0.00471931	0.000336686	PD 5' UTR (vs AR RNA)	32	-0.0259384	0.878134	0.729804	0	0	32	0.136197	0.505162	0.283524	0	0	36	0.686996	0.0653005	0.00396735	0	0		1	NULL		1	Hp1bp3		0	NULL		0		1	Hp1bp3	0
Hsd17b10	#N/A	#N/A	#N/A	#N/A	0	3	-0.294905	0.992769	0.991707	0	3	1.04929	0.0426953	0.0150234	0	10	0.393083	0.674084	0.400589	0	0	9	-0.124226	0.712804	0.537649	0	0	#N/A	#N/A	#N/A	#N/A	0	0		0	NULL		0	NULL		0	NULL		0		0		0
Hsd17b12	5	2.51411	0.00563319	0.00423507	0	4	0.772909	0.297438	0.209681	0	4	3.19996	0.00633368	0.000749222	PD 5' UTR (vs AR RNA)	21	0.188746	0.363938	0.0753932	0	0	21	0.200274	0.598773	0.391845	0	0	21	-0.0641838	0.903307	0.818892	0	0		0	NULL		1	Hsd17b12		0	NULL		0		0		1	Hsd17b12
Hsd17b4	#N/A	#N/A	#N/A	#N/A	0	#N/A	#N/A	#N/A	#N/A	0	#N/A	#N/A	#N/A	#N/A	0	26	0.0792888	0.684273	0.416197	0	0	22	-0.179078	0.534136	0.317692	0	0	#N/A	#N/A	#N/A	#N/A	0	0		0	NULL		0	NULL		0	NULL		0		0		0
Hsd17b8	#N/A	#N/A	#N/A	#N/A	0	#N/A	#N/A	#N/A	#N/A	0	#N/A	#N/A	#N/A	#N/A	0	#N/A	#N/A	#N/A	#N/A	0	0	2	-0.165157	0.575525	0.364417	0	0	#N/A	#N/A	#N/A	#N/A	0	0		0	NULL		0	NULL		0	NULL		0		0		0
Hsdl2	#N/A	#N/A	#N/A	#N/A	0	#N/A	#N/A	#N/A	#N/A	0	#N/A	#N/A	#N/A	#N/A	0	6	0.2979	0.655913	0.365516	0	0	3	0.154629	0.897564	0.809308	0	0	#N/A	#N/A	#N/A	#N/A	0	0		0	NULL		0	NULL		0	NULL		0		0		0
Hsp90aa1	#N/A	#N/A	#N/A	#N/A	0	12	-2.36001	0.0178503	0.00457588	0	12	-1.50534	0.137824	0.0714952	0	#N/A	#N/A	#N/A	#N/A	0	0	#N/A	#N/A	#N/A	#N/A	0	0	#N/A	#N/A	#N/A	#N/A	0	0		0	NULL		0	NULL		0	NULL		0		0		0
Hsp90ab1	10	1.37772	0.0561111	0.0532041	0	34	-1.75267	0.0150181	0.00343219	0	34	-0.767057	0.240374	0.144748	0	47	-0.242967	0.424559	0.114867	0	0	42	-0.164646	0.455682	0.23985	0	0	#N/A	#N/A	#N/A	#N/A	0	0		0	NULL		0	NULL		0	NULL		0		0		0
Hsp90b1	#N/A	#N/A	#N/A	#N/A	0	11	-1.01735	0.0877522	0.0442475	0	11	0.634261	0.953889	0.92736	0	#N/A	#N/A	#N/A	#N/A	0	0	#N/A	#N/A	#N/A	#N/A	0	0	#N/A	#N/A	#N/A	#N/A	0	0		0	NULL		0	NULL		0	NULL		0		0		0
Hspa14	#N/A	#N/A	#N/A	#N/A	0	3	3.9631	0.0284629	0.00867309	0	3	2.19784	0.292179	0.182122	0	#N/A	#N/A	#N/A	#N/A	0	0	#N/A	#N/A	#N/A	#N/A	0	0	#N/A	#N/A	#N/A	#N/A	0	0		0	NULL		0	NULL		0	NULL		0		0		0
Hspa1b	#N/A	#N/A	#N/A	#N/A	0	3	-4.57742	0.0102213	0.00177073	0	3	-3.48887	0.0173367	0.00418103	0	#N/A	#N/A	#N/A	#N/A	0	0	#N/A	#N/A	#N/A	#N/A	0	0	#N/A	#N/A	#N/A	#N/A	0	0		0	NULL		0	NULL		0	NULL		0		0		0
Hspa4	#N/A	#N/A	#N/A	#N/A	0	7	-1.10534	0.37328	0.282555	0	7	1.14203	0.344812	0.228533	0	5	-0.53573	0.721142	0.451417	0	0	3	-0.0319101	0.540122	0.322765	0	0	#N/A	#N/A	#N/A	#N/A	0	0		0	NULL		0	NULL		0	NULL		0		0		0
Hspa5	21	1.70655	0.0760816	0.07269	0	7	-1.30248	0.0322546	0.0108282	0	7	-0.124521	0.587598	0.47509	0	#N/A	#N/A	#N/A	#N/A	0	0	#N/A	#N/A	#N/A	#N/A	0	0	#N/A	#N/A	#N/A	#N/A	0	0		0	NULL		0	NULL		0	NULL		0		0		0
Hspa8	9	2.4265	0.00782375	0.00624958	0	18	-1.73883	0.00713266	0.00103022	0	18	-1.15942	0.0458815	0.0164774	0	#N/A	#N/A	#N/A	#N/A	0	0	#N/A	#N/A	#N/A	#N/A	0	0	#N/A	#N/A	#N/A	#N/A	0	0		0	NULL		0	NULL		0	NULL		0		0		0
Hspa9	6	0.910811	0.236619	0.231773	0	5	-2.52155	0.0159983	0.00381097	0	5	-2.88429	0.0201617	0.00529033	0	#N/A	#N/A	#N/A	#N/A	0	0	#N/A	#N/A	#N/A	#N/A	0	0	#N/A	#N/A	#N/A	#N/A	0	0		0	NULL		0	NULL		0	NULL		0		0		0
Hspd1	10	2.01805	0.0055434	0.00413417	0	18	-3.65552	0.0380955	0.0139243	0	18	-2.47702	0.0945527	0.0431032	0	#N/A	#N/A	#N/A	#N/A	0	0	#N/A	#N/A	#N/A	#N/A	0	0	#N/A	#N/A	#N/A	#N/A	0	0		0	NULL		0	NULL		0	NULL		0		0		0
Hsph1	#N/A	#N/A	#N/A	#N/A	0	#N/A	#N/A	#N/A	#N/A	0	#N/A	#N/A	#N/A	#N/A	0	3	-0.991066	0.0197191	0.000181936	0	0	#N/A	#N/A	#N/A	#N/A	0	0	#N/A	#N/A	#N/A	#N/A	0	0		0	NULL		0	NULL		0	NULL		0		0		0
Htra1	#N/A	#N/A	#N/A	#N/A	0	#N/A	#N/A	#N/A	#N/A	0	#N/A	#N/A	#N/A	#N/A	0	3	0.120017	0.832211	0.64714	0	0	2	-0.0236887	0.609214	0.401804	0	0	#N/A	#N/A	#N/A	#N/A	0	0		0	NULL		0	NULL		0	NULL		0		0		0
Hyou1	#N/A	#N/A	#N/A	#N/A	0	#N/A	#N/A	#N/A	#N/A	0	#N/A	#N/A	#N/A	#N/A	0	5	-0.0666539	0.675701	0.404077	0	0	#N/A	#N/A	#N/A	#N/A	0	0	#N/A	#N/A	#N/A	#N/A	0	0		0	NULL		0	NULL		0	NULL		0		0		0
Iap	#N/A	#N/A	#N/A	#N/A	0	#N/A	#N/A	#N/A	#N/A	0	#N/A	#N/A	#N/A	#N/A	0	7	0.252691	0.811846	0.610757	0	0	7	0.0163688	0.922086	0.848555	0	0	#N/A	#N/A	#N/A	#N/A	0	0		0	NULL		0	NULL		0	NULL		0		0		0
Iars	#N/A	#N/A	#N/A	#N/A	0	4	2.5554	0.0133489	0.00277896	PD 3' UTR (vs AR RNA)	4	3.88333	0.00548226	0.000481438	PD 5' UTR (vs AR RNA)	12	-1.01841	0.0861616	0.00171043	0	0	10	-0.565833	0.0329414	0.00145655	0	0	5	-0.113913	0.903307	0.821361	0	0		1	NULL		1	Iars		0	NULL		0		1	Iars	0
Idh1	#N/A	#N/A	#N/A	#N/A	0	5	-0.859892	0.0853866	0.0426417	0	5	-0.0781864	0.525087	0.407625	0	12	-0.521715	0.540157	0.201601	0	0	#N/A	#N/A	#N/A	#N/A	0	0	#N/A	#N/A	#N/A	#N/A	0	0		0	NULL		0	NULL		0	NULL		0		0		0
Idh2	#N/A	#N/A	#N/A	#N/A	0	2	-2.07169	0.0133489	0.0027707	0	2	-0.383962	0.587598	0.475336	0	15	-0.098948	0.879307	0.731516	0	0	8	0.172113	0.48493	0.266642	0	0	#N/A	#N/A	#N/A	#N/A	0	0		0	NULL		0	NULL		0	NULL		0		0		0
Idh3a	#N/A	#N/A	#N/A	#N/A	0	#N/A	#N/A	#N/A	#N/A	0	#N/A	#N/A	#N/A	#N/A	0	13	-0.00317633	0.995552	0.97892	0	0	11	0.536807	0.0329414	0.0015016	0	0	#N/A	#N/A	#N/A	#N/A	0	0		0	NULL		0	NULL		0	NULL		0		0		0
Idh3g	#N/A	#N/A	#N/A	#N/A	0	#N/A	#N/A	#N/A	#N/A	0	#N/A	#N/A	#N/A	#N/A	0	7	-0.0476878	0.737366	0.489592	0	0	8	0.280326	0.932747	0.868969	0	0	#N/A	#N/A	#N/A	#N/A	0	0		0	NULL		0	NULL		0	NULL		0		0		0
Igf2bp3	#N/A	#N/A	#N/A	#N/A	0	#N/A	#N/A	#N/A	#N/A	0	#N/A	#N/A	#N/A	#N/A	0	4	0.833652	0.264287	0.0269198	0	0	4	-0.528908	0.108744	0.0137832	0	0	#N/A	#N/A	#N/A	#N/A	0	0		0	NULL		0	NULL		0	NULL		0		0		0
Igfbp3	#N/A	#N/A	#N/A	#N/A	0	#N/A	#N/A	#N/A	#N/A	0	#N/A	#N/A	#N/A	#N/A	0	2	0.17468	0.827675	0.628448	0	0	#N/A	#N/A	#N/A	#N/A	0	0	#N/A	#N/A	#N/A	#N/A	0	0		0	NULL		0	NULL		0	NULL		0		0		0
Ik	10	3.95042	6.6258e-07	1.01383e-07	Drosha IP	#N/A	#N/A	#N/A	#N/A	0	#N/A	#N/A	#N/A	#N/A	0	8	0.0485767	0.869271	0.71812	0	0	4	-0.00842034	0.706328	0.52605	0	0	#N/A	#N/A	#N/A	#N/A	0	0		0	NULL		0	NULL		1	Ik		0		0		0
Ikbip	#N/A	#N/A	#N/A	#N/A	0	#N/A	#N/A	#N/A	#N/A	0	#N/A	#N/A	#N/A	#N/A	0	8	0.16712	0.723325	0.464246	0	0	5	0.0501741	0.684586	0.493448	0	0	#N/A	#N/A	#N/A	#N/A	0	0		0	NULL		0	NULL		0	NULL		0		0		0
Ikbkap	#N/A	#N/A	#N/A	#N/A	0	#N/A	#N/A	#N/A	#N/A	0	#N/A	#N/A	#N/A	#N/A	0	6	0.209722	0.461939	0.138352	0	0	3	0.147145	0.686401	0.502506	0	0	#N/A	#N/A	#N/A	#N/A	0	0		0	NULL		0	NULL		0	NULL		0		0		0
Ilf2	#N/A	#N/A	#N/A	#N/A	0	12	1.22179	0.0489952	0.0194914	PD 3' UTR (vs AR RNA)	12	1.74218	0.0215259	0.00575239	PD 5' UTR (vs AR RNA)	21	1.1933	0.168613	0.0085579	0	0	20	0.255934	0.288166	0.107139	0	0	21	-0.341209	0.530003	0.292802	0	0		1	NULL		1	Ilf2		0	NULL		0		1	Ilf2	0
Ilf3	8	4.82305	6.72827e-09	7.45784e-10	Drosha IP	19	1.72137	0.0142637	0.00313904	PD 3' UTR (vs AR RNA)	19	3.72698	0.00364138	0.000232529	PD 5' UTR (vs AR RNA)	47	1.03012	0.168613	0.00917484	0	0	53	0.286682	0.247994	0.0812941	0	0	51	-0.1746	0.539292	0.301938	0	0		1	NULL		1	Ilf3		1	Ilf3		0		0		0
Ilk	#N/A	#N/A	#N/A	#N/A	0	#N/A	#N/A	#N/A	#N/A	0	#N/A	#N/A	#N/A	#N/A	0	10	-0.315259	0.23699	0.0222021	0	0	9	-0.41927	0.113076	0.0158287	0	0	#N/A	#N/A	#N/A	#N/A	0	0		0	NULL		0	NULL		0	NULL		0		0		0
Immt	27	2.41317	0.00301398	0.00194963	0	#N/A	#N/A	#N/A	#N/A	0	#N/A	#N/A	#N/A	#N/A	0	42	-0.051894	0.723325	0.462003	0	0	50	0.18986	0.267266	0.0930863	0	0	#N/A	#N/A	#N/A	#N/A	0	0		0	NULL		0	NULL		0	NULL		0		0		0
Impad1	#N/A	#N/A	#N/A	#N/A	0	#N/A	#N/A	#N/A	#N/A	0	#N/A	#N/A	#N/A	#N/A	0	6	-0.145053	0.697015	0.429883	0	0	2	-0.106063	0.784342	0.637744	0	0	#N/A	#N/A	#N/A	#N/A	0	0		0	NULL		0	NULL		0	NULL		0		0		0
Impdh2	#N/A	#N/A	#N/A	#N/A	0	#N/A	#N/A	#N/A	#N/A	0	#N/A	#N/A	#N/A	#N/A	0	7	0.506752	0.338692	0.054085	0	0	4	0.663481	0.156899	0.0319674	0	0	#N/A	#N/A	#N/A	#N/A	0	0		0	NULL		0	NULL		0	NULL		0		0		0
Inf2	4	1.90499	0.0122113	0.0105341	0	#N/A	#N/A	#N/A	#N/A	0	#N/A	#N/A	#N/A	#N/A	0	#N/A	#N/A	#N/A	#N/A	0	0	#N/A	#N/A	#N/A	#N/A	0	0	#N/A	#N/A	#N/A	#N/A	0	0		0	NULL		0	NULL		0	NULL		0		0		0
Inppl1	#N/A	#N/A	#N/A	#N/A	0	#N/A	#N/A	#N/A	#N/A	0	#N/A	#N/A	#N/A	#N/A	0	2	-5.20213	0.185416	0.0116101	0	0	#N/A	#N/A	#N/A	#N/A	0	0	#N/A	#N/A	#N/A	#N/A	0	0		0	NULL		0	NULL		0	NULL		0		0		0
Ints3	#N/A	#N/A	#N/A	#N/A	0	#N/A	#N/A	#N/A	#N/A	0	#N/A	#N/A	#N/A	#N/A	0	2	0.208931	0.559571	0.220437	0	0	#N/A	#N/A	#N/A	#N/A	0	0	#N/A	#N/A	#N/A	#N/A	0	0		0	NULL		0	NULL		0	NULL		0		0		0
Ipo5	#N/A	#N/A	#N/A	#N/A	0	2	1.71034	0.80753	0.759683	0	2	4.68579	0.453458	0.33228	0	5	-0.476854	0.414894	0.105784	0	0	4	0.0734027	0.883363	0.780949	0	0	#N/A	#N/A	#N/A	#N/A	0	0		0	NULL		0	NULL		0	NULL		0		0		0
Ipo9	#N/A	#N/A	#N/A	#N/A	0	#N/A	#N/A	#N/A	#N/A	0	#N/A	#N/A	#N/A	#N/A	0	4	0.159799	0.562104	0.236145	0	0	3	-0.0291786	0.96759	0.939342	0	0	#N/A	#N/A	#N/A	#N/A	0	0		0	NULL		0	NULL		0	NULL		0		0		0
Iqgap1	5	3.02952	0.000288818	0.00010422	Drosha IP	#N/A	#N/A	#N/A	#N/A	0	#N/A	#N/A	#N/A	#N/A	0	11	0.0659117	0.659272	0.372449	0	0	7	0.145802	0.586326	0.375244	0	0	#N/A	#N/A	#N/A	#N/A	0	0		0	NULL		0	NULL		1	Iqgap1		0		0		0
Iqgap2	#N/A	#N/A	#N/A	#N/A	0	#N/A	#N/A	#N/A	#N/A	0	#N/A	#N/A	#N/A	#N/A	0	#N/A	#N/A	#N/A	#N/A	0	0	2	-0.0802044	0.919448	0.843072	0	0	#N/A	#N/A	#N/A	#N/A	0	0		0	NULL		0	NULL		0	NULL		0		0		0
Iqsec2	2	3.63825	7.68491e-06	1.60179e-06	0	#N/A	#N/A	#N/A	#N/A	0	#N/A	#N/A	#N/A	#N/A	0	#N/A	#N/A	#N/A	#N/A	0	0	#N/A	#N/A	#N/A	#N/A	0	0	#N/A	#N/A	#N/A	#N/A	0	0		0	NULL		0	NULL		0	NULL		0		0		0
Isg20l2	#N/A	#N/A	#N/A	#N/A	0	#N/A	#N/A	#N/A	#N/A	0	#N/A	#N/A	#N/A	#N/A	0	3	-0.0608828	0.995552	0.979947	0	0	5	-0.0967294	0.629022	0.433684	0	0	#N/A	#N/A	#N/A	#N/A	0	0		0	NULL		0	NULL		0	NULL		0		0		0
Isy1	2	5.46435	5.4796e-12	3.49902e-13	0	#N/A	#N/A	#N/A	#N/A	0	#N/A	#N/A	#N/A	#N/A	0	#N/A	#N/A	#N/A	#N/A	0	0	#N/A	#N/A	#N/A	#N/A	0	0	#N/A	#N/A	#N/A	#N/A	0	0		0	NULL		0	NULL		0	NULL		0		0		0
Itgav	#N/A	#N/A	#N/A	#N/A	0	#N/A	#N/A	#N/A	#N/A	0	#N/A	#N/A	#N/A	#N/A	0	8	-0.113284	0.577918	0.262914	0	0	7	0.249548	0.151313	0.0297454	0	0	#N/A	#N/A	#N/A	#N/A	0	0		0	NULL		0	NULL		0	NULL		0		0		0
Itgb1	#N/A	#N/A	#N/A	#N/A	0	2	-1.96893	0.0646596	0.0289287	0	2	-0.770806	0.705114	0.611326	0	11	-0.221601	0.535636	0.195019	0	0	4	0.155579	0.480154	0.261964	0	0	#N/A	#N/A	#N/A	#N/A	0	0		0	NULL		0	NULL		0	NULL		0		0		0
Itm2c	#N/A	#N/A	#N/A	#N/A	0	#N/A	#N/A	#N/A	#N/A	0	#N/A	#N/A	#N/A	#N/A	0	3	0.228889	0.540157	0.198979	0	0	3	0.158174	0.555349	0.336611	0	0	#N/A	#N/A	#N/A	#N/A	0	0		0	NULL		0	NULL		0	NULL		0		0		0
Itpr2	9	2.22606	0.00866992	0.00702995	0	#N/A	#N/A	#N/A	#N/A	0	#N/A	#N/A	#N/A	#N/A	0	17	-0.408367	0.560159	0.233473	0	0	11	0.30615	0.232274	0.0744467	0	0	#N/A	#N/A	#N/A	#N/A	0	0		0	NULL		0	NULL		0	NULL		0		0		0
Jup	4	2.37503	0.0252622	0.0232853	0	#N/A	#N/A	#N/A	#N/A	0	#N/A	#N/A	#N/A	#N/A	0	#N/A	#N/A	#N/A	#N/A	0	0	#N/A	#N/A	#N/A	#N/A	0	0	#N/A	#N/A	#N/A	#N/A	0	0		0	NULL		0	NULL		0	NULL		0		0		0
Kars	#N/A	#N/A	#N/A	#N/A	0	8	2.07225	0.0102213	0.00177977	PD 3' UTR (vs AR RNA)	8	1.59869	0.0215535	0.00584847	PD 5' UTR (vs AR RNA)	25	-1.32894	0.0119618	8.48955e-05	0	0	33	-1.70903	0.000664656	5.20742e-06	0	0	14	0.203223	0.412765	0.179987	0	0		1	NULL		1	Kars		0	NULL		0		1	Kars	0
Kcnj10	2	2.2996	0.00555951	0.00415959	0	#N/A	#N/A	#N/A	#N/A	0	#N/A	#N/A	#N/A	#N/A	0	4	0.242703	0.566201	0.248341	0	0	5	0.249449	0.195893	0.0542752	0	0	#N/A	#N/A	#N/A	#N/A	0	0		0	NULL		0	NULL		0	NULL		0		0		0
Kdm1a	#N/A	#N/A	#N/A	#N/A	0	#N/A	#N/A	#N/A	#N/A	0	#N/A	#N/A	#N/A	#N/A	0	2	0.0258585	0.795884	0.58884	0	0	#N/A	#N/A	#N/A	#N/A	0	0	#N/A	#N/A	#N/A	#N/A	0	0		0	NULL		0	NULL		0	NULL		0		0		0
Khdrbs1	8	6.28238	2.6495e-13	1.11726e-14	Drosha IP	9	2.42324	0.0082628	0.00130886	PD 3' UTR (vs AR RNA)	9	3.08661	0.00829097	0.00120304	PD 5' UTR (vs AR RNA)	20	0.8705	0.355164	0.0645294	0	0	13	0.400229	0.100241	0.0115229	0	0	19	2.06389	0.0521102	0.00260037	0	0		1	NULL		1	Khdrbs1		1	Khdrbs1		0		0		0
Khdrbs3	#N/A	#N/A	#N/A	#N/A	0	7	0.954965	0.0944087	0.0492021	0	7	1.19502	0.115141	0.0572225	0	12	0.934054	0.254401	0.0245554	0	0	2	0.831384	0.0256691	0.000987273	0	0	#N/A	#N/A	#N/A	#N/A	0	0		0	NULL		0	NULL		0	NULL		0		0		0
Khsrp	13	4.80118	1.10641e-09	1.10641e-10	Drosha IP	21	-0.461363	0.588183	0.496435	0	21	-2.02942	0.0100099	0.00169455	0	36	0.108183	0.901606	0.76083	0	0	29	0.103067	0.710244	0.533572	0	0	#N/A	#N/A	#N/A	#N/A	0	0		0	NULL		0	NULL		1	Khsrp		0		0		0
Kiaa1161	#N/A	#N/A	#N/A	#N/A	0	#N/A	#N/A	#N/A	#N/A	0	#N/A	#N/A	#N/A	#N/A	0	#N/A	#N/A	#N/A	#N/A	0	0	#N/A	#N/A	#N/A	#N/A	0	0	#N/A	#N/A	#N/A	#N/A	0	0		0	NULL		0	NULL		0	NULL		0		0		0
Kiaa1211	34	1.92263	0.015983	0.0142306	0	#N/A	#N/A	#N/A	#N/A	0	#N/A	#N/A	#N/A	#N/A	0	#N/A	#N/A	#N/A	#N/A	0	0	#N/A	#N/A	#N/A	#N/A	0	0	#N/A	#N/A	#N/A	#N/A	0	0		0	NULL		0	NULL		0	NULL		0		0		0
Kiaa1671	2	1.86262	0.0195055	0.0176959	0	#N/A	#N/A	#N/A	#N/A	0	#N/A	#N/A	#N/A	#N/A	0	#N/A	#N/A	#N/A	#N/A	0	0	#N/A	#N/A	#N/A	#N/A	0	0	#N/A	#N/A	#N/A	#N/A	0	0		0	NULL		0	NULL		0	NULL		0		0		0
Kif1a	#N/A	#N/A	#N/A	#N/A	0	#N/A	#N/A	#N/A	#N/A	0	#N/A	#N/A	#N/A	#N/A	0	#N/A	#N/A	#N/A	#N/A	0	0	3	-0.0432984	0.745524	0.585601	0	0	#N/A	#N/A	#N/A	#N/A	0	0		0	NULL		0	NULL		0	NULL		0		0		0
Kif1b	#N/A	#N/A	#N/A	#N/A	0	#N/A	#N/A	#N/A	#N/A	0	#N/A	#N/A	#N/A	#N/A	0	2	0.00301458	0.837453	0.659145	0	0	#N/A	#N/A	#N/A	#N/A	0	0	#N/A	#N/A	#N/A	#N/A	0	0		0	NULL		0	NULL		0	NULL		0		0		0
Kif1c	#N/A	#N/A	#N/A	#N/A	0	#N/A	#N/A	#N/A	#N/A	0	#N/A	#N/A	#N/A	#N/A	0	#N/A	#N/A	#N/A	#N/A	0	0	#N/A	#N/A	#N/A	#N/A	0	0	#N/A	#N/A	#N/A	#N/A	0	0		0	NULL		0	NULL		0	NULL		0		0		0
Kif21b	13	2.26689	0.00452602	0.00323365	0	#N/A	#N/A	#N/A	#N/A	0	#N/A	#N/A	#N/A	#N/A	0	#N/A	#N/A	#N/A	#N/A	0	0	#N/A	#N/A	#N/A	#N/A	0	0	#N/A	#N/A	#N/A	#N/A	0	0		0	NULL		0	NULL		0	NULL		0		0		0
Kif2a	4	2.6163	0.00153444	0.000820831	0	14	1.93151	0.00651026	0.000905297	PD 3' UTR (vs AR RNA)	14	1.50158	0.0514443	0.0194705	PD 5' UTR (vs AR RNA)	15	-0.284723	0.365734	0.0770922	0	0	12	-0.141741	0.405192	0.193334	0	0	16	0.543645	0.366617	0.137063	0	0		1	NULL		1	Kif2a		0	NULL		0		1	Kif2a	0
Kif5b	#N/A	#N/A	#N/A	#N/A	0	2	3.45273	0.143577	0.0848965	0	2	2.4727	0.402342	0.283634	0	10	-0.264821	0.361592	0.0716644	0	0	8	-0.0164838	0.934276	0.879341	0	0	#N/A	#N/A	#N/A	#N/A	0	0		0	NULL		0	NULL		0	NULL		0		0		0
Kpna1	#N/A	#N/A	#N/A	#N/A	0	#N/A	#N/A	#N/A	#N/A	0	#N/A	#N/A	#N/A	#N/A	0	2	-0.295871	0.559571	0.222208	0	0	#N/A	#N/A	#N/A	#N/A	0	0	#N/A	#N/A	#N/A	#N/A	0	0		0	NULL		0	NULL		0	NULL		0		0		0
Kpna4	#N/A	#N/A	#N/A	#N/A	0	#N/A	#N/A	#N/A	#N/A	0	#N/A	#N/A	#N/A	#N/A	0	3	0.106424	0.661831	0.377183	0	0	2	-0.670711	0.480154	0.260024	0	0	#N/A	#N/A	#N/A	#N/A	0	0		0	NULL		0	NULL		0	NULL		0		0		0
Kpnb1	#N/A	#N/A	#N/A	#N/A	0	2	-2.96813	0.106452	0.0581816	0	2	-1.82713	0.206423	0.117681	0	9	-0.258939	0.422663	0.113569	0	0	6	0.0300674	0.66172	0.46754	0	0	#N/A	#N/A	#N/A	#N/A	0	0		0	NULL		0	NULL		0	NULL		0		0		0
Ktn1	#N/A	#N/A	#N/A	#N/A	0	3	1.58572	0.241652	0.16305	0	3	-0.0335667	0.816918	0.740857	0	32	-0.0234173	0.903657	0.772319	0	0	22	-0.14088	0.605739	0.398217	0	0	#N/A	#N/A	#N/A	#N/A	0	0		0	NULL		0	NULL		0	NULL		0		0		0
Lamtor1	#N/A	#N/A	#N/A	#N/A	0	#N/A	#N/A	#N/A	#N/A	0	#N/A	#N/A	#N/A	#N/A	0	2	-0.229151	0.467188	0.141582	0	0	#N/A	#N/A	#N/A	#N/A	0	0	#N/A	#N/A	#N/A	#N/A	0	0		0	NULL		0	NULL		0	NULL		0		0		0
Larp1	#N/A	#N/A	#N/A	#N/A	0	#N/A	#N/A	#N/A	#N/A	0	#N/A	#N/A	#N/A	#N/A	0	4	0.241565	0.540157	0.200201	0	0	#N/A	#N/A	#N/A	#N/A	0	0	#N/A	#N/A	#N/A	#N/A	0	0		0	NULL		0	NULL		0	NULL		0		0		0
Larp4	3	2.99287	0.00047265	0.000187921	0	#N/A	#N/A	#N/A	#N/A	0	#N/A	#N/A	#N/A	#N/A	0	3	0.157472	0.560159	0.2338	0	0	2	0.727993	0.0684688	0.0051693	0	0	#N/A	#N/A	#N/A	#N/A	0	0		0	NULL		0	NULL		0	NULL		0		0		0
Larp7	#N/A	#N/A	#N/A	#N/A	0	#N/A	#N/A	#N/A	#N/A	0	#N/A	#N/A	#N/A	#N/A	0	#N/A	#N/A	#N/A	#N/A	0	0	2	0.756425	0.99278	0.987584	0	0	#N/A	#N/A	#N/A	#N/A	0	0		0	NULL		0	NULL		0	NULL		0		0		0
Lars	#N/A	#N/A	#N/A	#N/A	0	2	1.86617	0.00829743	0.00133441	0	2	-0.363869	0.651397	0.549788	0	6	-0.895522	0.105306	0.00306427	0	0	14	-0.84993	0.0268799	0.00109128	0	0	#N/A	#N/A	#N/A	#N/A	0	0		0	NULL		0	NULL		0	NULL		0		0		0
Las1l	#N/A	#N/A	#N/A	#N/A	0	#N/A	#N/A	#N/A	#N/A	0	#N/A	#N/A	#N/A	#N/A	0	2	-0.816489	0.650208	0.35856	0	0	#N/A	#N/A	#N/A	#N/A	0	0	#N/A	#N/A	#N/A	#N/A	0	0		0	NULL		0	NULL		0	NULL		0		0		0
Lasp1	2	1.34252	0.0664637	0.0633407	0	#N/A	#N/A	#N/A	#N/A	0	#N/A	#N/A	#N/A	#N/A	0	#N/A	#N/A	#N/A	#N/A	0	0	#N/A	#N/A	#N/A	#N/A	0	0	#N/A	#N/A	#N/A	#N/A	0	0		0	NULL		0	NULL		0	NULL		0		0		0
Lbr	#N/A	#N/A	#N/A	#N/A	0	#N/A	#N/A	#N/A	#N/A	0	#N/A	#N/A	#N/A	#N/A	0	12	-0.117261	0.995273	0.969573	0	0	13	0.208229	0.514848	0.294094	0	0	#N/A	#N/A	#N/A	#N/A	0	0		0	NULL		0	NULL		0	NULL		0		0		0
Lclat1	#N/A	#N/A	#N/A	#N/A	0	#N/A	#N/A	#N/A	#N/A	0	#N/A	#N/A	#N/A	#N/A	0	#N/A	#N/A	#N/A	#N/A	0	0	3	0.139665	0.915872	0.836287	0	0	#N/A	#N/A	#N/A	#N/A	0	0		0	NULL		0	NULL		0	NULL		0		0		0
Ldha	#N/A	#N/A	#N/A	#N/A	0	7	-2.08855	0.039337	0.0145129	0	7	0.238266	0.73068	0.636142	0	#N/A	#N/A	#N/A	#N/A	0	0	#N/A	#N/A	#N/A	#N/A	0	0	#N/A	#N/A	#N/A	#N/A	0	0		0	NULL		0	NULL		0	NULL		0		0		0
Ldhb	#N/A	#N/A	#N/A	#N/A	0	3	-4.53421	0.0271944	0.0080235	0	3	-2.9379	0.0548457	0.021106	0	#N/A	#N/A	#N/A	#N/A	0	0	#N/A	#N/A	#N/A	#N/A	0	0	#N/A	#N/A	#N/A	#N/A	0	0		0	NULL		0	NULL		0	NULL		0		0		0
Lemd2	#N/A	#N/A	#N/A	#N/A	0	#N/A	#N/A	#N/A	#N/A	0	#N/A	#N/A	#N/A	#N/A	0	#N/A	#N/A	#N/A	#N/A	0	0	3	-0.0667062	0.686401	0.498743	0	0	#N/A	#N/A	#N/A	#N/A	0	0		0	NULL		0	NULL		0	NULL		0		0		0
Lemd3	2	4.26658	3.0358e-07	4.53541e-08	0	#N/A	#N/A	#N/A	#N/A	0	#N/A	#N/A	#N/A	#N/A	0	#N/A	#N/A	#N/A	#N/A	0	0	#N/A	#N/A	#N/A	#N/A	0	0	#N/A	#N/A	#N/A	#N/A	0	0		0	NULL		0	NULL		0	NULL		0		0		0
Leng8	#N/A	#N/A	#N/A	#N/A	0	#N/A	#N/A	#N/A	#N/A	0	#N/A	#N/A	#N/A	#N/A	0	2	0.142156	0.753512	0.515452	0	0	#N/A	#N/A	#N/A	#N/A	0	0	#N/A	#N/A	#N/A	#N/A	0	0		0	NULL		0	NULL		0	NULL		0		0		0
Letm1	#N/A	#N/A	#N/A	#N/A	0	#N/A	#N/A	#N/A	#N/A	0	#N/A	#N/A	#N/A	#N/A	0	5	-0.0293226	0.662272	0.379314	0	0	6	0.395417	0.149724	0.0283666	0	0	#N/A	#N/A	#N/A	#N/A	0	0		0	NULL		0	NULL		0	NULL		0		0		0
Lgals1	#N/A	#N/A	#N/A	#N/A	0	3	-1.06996	0.09892	0.0529886	0	3	-0.969735	0.280548	0.174028	0	4	-0.910857	0.314955	0.0437214	0	0	5	0.321827	0.505162	0.283137	0	0	#N/A	#N/A	#N/A	#N/A	0	0		0	NULL		0	NULL		0	NULL		0		0		0
Lig1	#N/A	#N/A	#N/A	#N/A	0	#N/A	#N/A	#N/A	#N/A	0	#N/A	#N/A	#N/A	#N/A	0	2	-0.851576	0.10459	0.00274657	0	0	#N/A	#N/A	#N/A	#N/A	0	0	#N/A	#N/A	#N/A	#N/A	0	0		0	NULL		0	NULL		0	NULL		0		0		0
Lig3	#N/A	#N/A	#N/A	#N/A	0	#N/A	#N/A	#N/A	#N/A	0	#N/A	#N/A	#N/A	#N/A	0	2	-0.364339	0.623239	0.329091	0	0	#N/A	#N/A	#N/A	#N/A	0	0	#N/A	#N/A	#N/A	#N/A	0	0		0	NULL		0	NULL		0	NULL		0		0		0
Lima1	24	2.15896	0.00746059	0.00590555	0	#N/A	#N/A	#N/A	#N/A	0	#N/A	#N/A	#N/A	#N/A	0	#N/A	#N/A	#N/A	#N/A	0	0	#N/A	#N/A	#N/A	#N/A	0	0	#N/A	#N/A	#N/A	#N/A	0	0		0	NULL		0	NULL		0	NULL		0		0		0
Limch1	23	2.20125	0.00553129	0.00411181	0	#N/A	#N/A	#N/A	#N/A	0	#N/A	#N/A	#N/A	#N/A	0	#N/A	#N/A	#N/A	#N/A	0	0	#N/A	#N/A	#N/A	#N/A	0	0	#N/A	#N/A	#N/A	#N/A	0	0		0	NULL		0	NULL		0	NULL		0		0		0
Llgl1	3	2.3061	0.00193392	0.00108812	0	#N/A	#N/A	#N/A	#N/A	0	#N/A	#N/A	#N/A	#N/A	0	9	0.174116	0.566329	0.251547	0	0	17	0.295819	0.383819	0.173372	0	0	#N/A	#N/A	#N/A	#N/A	0	0		0	NULL		0	NULL		0	NULL		0		0		0
Lman1	#N/A	#N/A	#N/A	#N/A	0	#N/A	#N/A	#N/A	#N/A	0	#N/A	#N/A	#N/A	#N/A	0	12	0.0498669	0.674084	0.399606	0	0	11	0.204851	0.218088	0.0650848	0	0	#N/A	#N/A	#N/A	#N/A	0	0		0	NULL		0	NULL		0	NULL		0		0		0
Lman2	#N/A	#N/A	#N/A	#N/A	0	#N/A	#N/A	#N/A	#N/A	0	#N/A	#N/A	#N/A	#N/A	0	8	-0.365289	0.413846	0.0992762	0	0	7	0.17287	0.919719	0.844591	0	0	#N/A	#N/A	#N/A	#N/A	0	0		0	NULL		0	NULL		0	NULL		0		0		0
Lmf2	#N/A	#N/A	#N/A	#N/A	0	#N/A	#N/A	#N/A	#N/A	0	#N/A	#N/A	#N/A	#N/A	0	3	0.507389	0.168613	0.00878994	0	0	5	0.178924	0.441621	0.226327	0	0	#N/A	#N/A	#N/A	#N/A	0	0		0	NULL		0	NULL		0	NULL		0		0		0
Lmna	7	2.91594	0.0031168	0.00205256	0	2	-6.00083	0.00354809	0.00021261	0	2	-4.64251	0.00729663	0.000969129	0	9	0.200364	0.531665	0.190554	0	0	9	0.273545	0.284608	0.105207	0	0	#N/A	#N/A	#N/A	#N/A	0	0		0	NULL		0	NULL		0	NULL		0		0		0
Lmnb1	13	3.07753	0.000564209	0.000230442	Drosha IP	9	-1.59483	0.0284629	0.00861177	0	9	-0.34775	0.514096	0.396149	0	44	-0.13141	0.691058	0.422776	0	0	35	-0.0547583	0.797052	0.656057	0	0	#N/A	#N/A	#N/A	#N/A	0	0		0	NULL		0	NULL		1	Lmnb1		0		0		0
Lmnb2	#N/A	#N/A	#N/A	#N/A	0	#N/A	#N/A	#N/A	#N/A	0	#N/A	#N/A	#N/A	#N/A	0	4	0.213601	0.7516	0.512738	0	0	2	-0.154748	0.38619	0.176316	0	0	#N/A	#N/A	#N/A	#N/A	0	0		0	NULL		0	NULL		0	NULL		0		0		0
Lonp1	#N/A	#N/A	#N/A	#N/A	0	#N/A	#N/A	#N/A	#N/A	0	#N/A	#N/A	#N/A	#N/A	0	5	0.199822	0.848989	0.686904	0	0	6	0.575335	0.0738987	0.00631613	0	0	#N/A	#N/A	#N/A	#N/A	0	0		0	NULL		0	NULL		0	NULL		0		0		0
Lonp2	#N/A	#N/A	#N/A	#N/A	0	#N/A	#N/A	#N/A	#N/A	0	#N/A	#N/A	#N/A	#N/A	0	5	-0.0158577	0.760265	0.528895	0	0	5	-0.113937	0.530671	0.315061	0	0	#N/A	#N/A	#N/A	#N/A	0	0		0	NULL		0	NULL		0	NULL		0		0		0
Lpcat1	#N/A	#N/A	#N/A	#N/A	0	#N/A	#N/A	#N/A	#N/A	0	#N/A	#N/A	#N/A	#N/A	0	7	0.461874	0.288774	0.0359708	0	0	7	-0.0447424	0.967868	0.943741	0	0	#N/A	#N/A	#N/A	#N/A	0	0		0	NULL		0	NULL		0	NULL		0		0		0
Lrch1	2	2.59754	0.00144979	0.000766816	0	#N/A	#N/A	#N/A	#N/A	0	#N/A	#N/A	#N/A	#N/A	0	#N/A	#N/A	#N/A	#N/A	0	0	#N/A	#N/A	#N/A	#N/A	0	0	#N/A	#N/A	#N/A	#N/A	0	0		0	NULL		0	NULL		0	NULL		0		0		0
Lrch2	6	2.03788	0.0140251	0.0123354	0	#N/A	#N/A	#N/A	#N/A	0	#N/A	#N/A	#N/A	#N/A	0	#N/A	#N/A	#N/A	#N/A	0	0	#N/A	#N/A	#N/A	#N/A	0	0	#N/A	#N/A	#N/A	#N/A	0	0		0	NULL		0	NULL		0	NULL		0		0		0
Lrch3	10	2.11117	0.00967767	0.00802197	0	#N/A	#N/A	#N/A	#N/A	0	#N/A	#N/A	#N/A	#N/A	0	#N/A	#N/A	#N/A	#N/A	0	0	#N/A	#N/A	#N/A	#N/A	0	0	#N/A	#N/A	#N/A	#N/A	0	0		0	NULL		0	NULL		0	NULL		0		0		0
Lrp1	#N/A	#N/A	#N/A	#N/A	0	#N/A	#N/A	#N/A	#N/A	0	#N/A	#N/A	#N/A	#N/A	0	2	0.440057	0.839642	0.66504	0	0	2	-0.0200539	0.771699	0.616767	0	0	#N/A	#N/A	#N/A	#N/A	0	0		0	NULL		0	NULL		0	NULL		0		0		0
Lrpprc	#N/A	#N/A	#N/A	#N/A	0	42	-5.97417	0.000450386	5.25117e-06	0	42	-5.23742	0.00192024	1.44917e-05	0	50	-0.673618	0.0486894	0.000725676	0	0	82	-1.85621	0.000816022	8.71819e-06	0	0	#N/A	#N/A	#N/A	#N/A	0	0		0	NULL		0	NULL		0	NULL		0		0		0
Lrrc40	#N/A	#N/A	#N/A	#N/A	0	#N/A	#N/A	#N/A	#N/A	0	#N/A	#N/A	#N/A	#N/A	0	3	0.0242104	0.721931	0.454473	0	0	#N/A	#N/A	#N/A	#N/A	0	0	#N/A	#N/A	#N/A	#N/A	0	0		0	NULL		0	NULL		0	NULL		0		0		0
Lrrc47	#N/A	#N/A	#N/A	#N/A	0	#N/A	#N/A	#N/A	#N/A	0	#N/A	#N/A	#N/A	#N/A	0	3	0.695318	0.799809	0.596157	0	0	7	0.516704	0.253636	0.0849705	0	0	#N/A	#N/A	#N/A	#N/A	0	0		0	NULL		0	NULL		0	NULL		0		0		0
Lrrc49	2	2.43079	0.00271288	0.00169964	0	#N/A	#N/A	#N/A	#N/A	0	#N/A	#N/A	#N/A	#N/A	0	#N/A	#N/A	#N/A	#N/A	0	0	#N/A	#N/A	#N/A	#N/A	0	0	#N/A	#N/A	#N/A	#N/A	0	0		0	NULL		0	NULL		0	NULL		0		0		0
Lrrc59	3	3.196	0.00075479	0.000329197	0	2	0.508624	0.270132	0.187492	0	2	2.74609	0.0104699	0.00182306	0	20	0.199199	0.574778	0.260596	0	0	18	0.161498	0.356365	0.15077	0	0	#N/A	#N/A	#N/A	#N/A	0	0		0	NULL		0	NULL		0	NULL		0		0		0
Lrrfip1	12	2.06271	0.0128394	0.0111224	0	#N/A	#N/A	#N/A	#N/A	0	#N/A	#N/A	#N/A	#N/A	0	#N/A	#N/A	#N/A	#N/A	0	0	#N/A	#N/A	#N/A	#N/A	0	0	#N/A	#N/A	#N/A	#N/A	0	0		0	NULL		0	NULL		0	NULL		0		0		0
Lrrfip2	9	2.70681	0.00209536	0.00121935	0	#N/A	#N/A	#N/A	#N/A	0	#N/A	#N/A	#N/A	#N/A	0	#N/A	#N/A	#N/A	#N/A	0	0	#N/A	#N/A	#N/A	#N/A	0	0	#N/A	#N/A	#N/A	#N/A	0	0		0	NULL		0	NULL		0	NULL		0		0		0
Lsamp	2	3.30976	0.000260322	9.06422e-05	0	#N/A	#N/A	#N/A	#N/A	0	#N/A	#N/A	#N/A	#N/A	0	#N/A	#N/A	#N/A	#N/A	0	0	#N/A	#N/A	#N/A	#N/A	0	0	#N/A	#N/A	#N/A	#N/A	0	0		0	NULL		0	NULL		0	NULL		0		0		0
Lsm12	2	3.3513	3.97136e-05	1.00002e-05	0	#N/A	#N/A	#N/A	#N/A	0	#N/A	#N/A	#N/A	#N/A	0	#N/A	#N/A	#N/A	#N/A	0	0	#N/A	#N/A	#N/A	#N/A	0	0	#N/A	#N/A	#N/A	#N/A	0	0		0	NULL		0	NULL		0	NULL		0		0		0
Lsm14a	#N/A	#N/A	#N/A	#N/A	0	4	-2.50836	0.0111832	0.00205543	0	4	-1.32808	0.22601	0.131999	0	9	0.37826	0.385807	0.084625	0	0	12	-0.0772187	0.927091	0.858223	0	0	#N/A	#N/A	#N/A	#N/A	0	0		0	NULL		0	NULL		0	NULL		0		0		0
Lsm2	#N/A	#N/A	#N/A	#N/A	0	3	-1.88961	0.0110123	0.00201071	0	3	-2.93193	0.0056175	0.000566642	0	4	0.0311873	0.760265	0.528487	0	0	3	-1.95541	0.0100287	0.00026429	0	0	#N/A	#N/A	#N/A	#N/A	0	0		0	NULL		0	NULL		0	NULL		0		0		0
Lsm3	#N/A	#N/A	#N/A	#N/A	0	#N/A	#N/A	#N/A	#N/A	0	#N/A	#N/A	#N/A	#N/A	0	3	0.985202	0.532582	0.192676	0	0	3	-2.31876	0.000174339	8.84521e-07	0	0	#N/A	#N/A	#N/A	#N/A	0	0		0	NULL		0	NULL		0	NULL		0		0		0
Lsm4	#N/A	#N/A	#N/A	#N/A	0	2	-2.27657	0.0167133	0.00410662	0	2	-2.62413	0.013066	0.00262268	0	5	-0.290975	0.332531	0.0517352	0	0	7	-1.51618	0.00315295	4.94053e-05	0	0	#N/A	#N/A	#N/A	#N/A	0	0		0	NULL		0	NULL		0	NULL		0		0		0
Lsm6	#N/A	#N/A	#N/A	#N/A	0	#N/A	#N/A	#N/A	#N/A	0	#N/A	#N/A	#N/A	#N/A	0	2	0.741876	0.282794	0.0335178	0	0	2	-1.20489	0.0343018	0.00169589	0	0	#N/A	#N/A	#N/A	#N/A	0	0		0	NULL		0	NULL		0	NULL		0		0		0
Lsm8	#N/A	#N/A	#N/A	#N/A	0	#N/A	#N/A	#N/A	#N/A	0	#N/A	#N/A	#N/A	#N/A	0	#N/A	#N/A	#N/A	#N/A	0	0	4	-2.14348	0.00740626	0.000142428	0	0	#N/A	#N/A	#N/A	#N/A	0	0		0	NULL		0	NULL		0	NULL		0		0		0
Luc7l	#N/A	#N/A	#N/A	#N/A	0	2	-3.55825	0.400018	0.309083	0	2	-3.66369	0.319069	0.204868	0	9	0.457811	0.330722	0.0511693	0	0	11	0.460779	0.0680732	0.00509094	0	0	#N/A	#N/A	#N/A	#N/A	0	0		0	NULL		0	NULL		0	NULL		0		0		0
Luc7l2	5	2.46659	0.00301398	0.00194122	0	19	-2.12851	0.0222258	0.00607381	0	19	-1.84021	0.0276596	0.00846175	0	#N/A	#N/A	#N/A	#N/A	0	0	#N/A	#N/A	#N/A	#N/A	0	0	#N/A	#N/A	#N/A	#N/A	0	0		0	NULL		0	NULL		0	NULL		0		0		0
Luc7l3	#N/A	#N/A	#N/A	#N/A	0	2	-1.62833	0.0159983	0.00378303	0	2	-0.156875	0.902871	0.845009	0	14	0.431507	0.623239	0.328202	0	0	12	0.464402	0.113076	0.0156127	0	0	#N/A	#N/A	#N/A	#N/A	0	0		0	NULL		0	NULL		0	NULL		0		0		0
Luzp1	5	2.07759	0.00490222	0.0035733	0	#N/A	#N/A	#N/A	#N/A	0	#N/A	#N/A	#N/A	#N/A	0	#N/A	#N/A	#N/A	#N/A	0	0	#N/A	#N/A	#N/A	#N/A	0	0	#N/A	#N/A	#N/A	#N/A	0	0		0	NULL		0	NULL		0	NULL		0		0		0
Lxn	#N/A	#N/A	#N/A	#N/A	0	#N/A	#N/A	#N/A	#N/A	0	#N/A	#N/A	#N/A	#N/A	0	#N/A	#N/A	#N/A	#N/A	0	0	3	0.00141054	0.927091	0.856917	0	0	#N/A	#N/A	#N/A	#N/A	0	0		0	NULL		0	NULL		0	NULL		0		0		0
Lyar	#N/A	#N/A	#N/A	#N/A	0	#N/A	#N/A	#N/A	#N/A	0	#N/A	#N/A	#N/A	#N/A	0	15	0.0948649	0.595032	0.287362	0	0	17	-0.00324545	0.9358	0.882394	0	0	#N/A	#N/A	#N/A	#N/A	0	0		0	NULL		0	NULL		0	NULL		0		0		0
Lyn	4	2.70639	0.0025857	0.0016075	0	#N/A	#N/A	#N/A	#N/A	0	#N/A	#N/A	#N/A	#N/A	0	#N/A	#N/A	#N/A	#N/A	0	0	#N/A	#N/A	#N/A	#N/A	0	0	#N/A	#N/A	#N/A	#N/A	0	0		0	NULL		0	NULL		0	NULL		0		0		0
Lypla2	#N/A	#N/A	#N/A	#N/A	0	#N/A	#N/A	#N/A	#N/A	0	#N/A	#N/A	#N/A	#N/A	0	2	-0.966646	0.421597	0.111866	0	0	#N/A	#N/A	#N/A	#N/A	0	0	#N/A	#N/A	#N/A	#N/A	0	0		0	NULL		0	NULL		0	NULL		0		0		0
Lzts2	8	2.04824	0.00656207	0.00512353	0	#N/A	#N/A	#N/A	#N/A	0	#N/A	#N/A	#N/A	#N/A	0	#N/A	#N/A	#N/A	#N/A	0	0	#N/A	#N/A	#N/A	#N/A	0	0	#N/A	#N/A	#N/A	#N/A	0	0		0	NULL		0	NULL		0	NULL		0		0		0
Lzts3	3	1.94184	0.0148256	0.0131287	0	#N/A	#N/A	#N/A	#N/A	0	#N/A	#N/A	#N/A	#N/A	0	#N/A	#N/A	#N/A	#N/A	0	0	#N/A	#N/A	#N/A	#N/A	0	0	#N/A	#N/A	#N/A	#N/A	0	0		0	NULL		0	NULL		0	NULL		0		0		0
Macf1	24	2.54216	0.00154871	0.000832198	0	#N/A	#N/A	#N/A	#N/A	0	#N/A	#N/A	#N/A	#N/A	0	21	0.00129963	0.903657	0.77067	0	0	17	0.0722264	0.84891	0.727254	0	0	#N/A	#N/A	#N/A	#N/A	0	0		0	NULL		0	NULL		0	NULL		0		0		0
Maged1	5	2.52749	0.00125278	0.000614313	0	#N/A	#N/A	#N/A	#N/A	0	#N/A	#N/A	#N/A	#N/A	0	#N/A	#N/A	#N/A	#N/A	0	0	#N/A	#N/A	#N/A	#N/A	0	0	#N/A	#N/A	#N/A	#N/A	0	0		0	NULL		0	NULL		0	NULL		0		0		0
Magi1	4	2.06805	0.00445231	0.00315953	0	#N/A	#N/A	#N/A	#N/A	0	#N/A	#N/A	#N/A	#N/A	0	#N/A	#N/A	#N/A	#N/A	0	0	#N/A	#N/A	#N/A	#N/A	0	0	#N/A	#N/A	#N/A	#N/A	0	0		0	NULL		0	NULL		0	NULL		0		0		0
Magohb	2	3.52589	1.45424e-05	3.20633e-06	0	#N/A	#N/A	#N/A	#N/A	0	#N/A	#N/A	#N/A	#N/A	0	5	0.318842	0.319838	0.0468216	0	0	6	-0.011979	0.629022	0.433472	0	0	#N/A	#N/A	#N/A	#N/A	0	0		0	NULL		0	NULL		0	NULL		0		0		0
Magt1	#N/A	#N/A	#N/A	#N/A	0	#N/A	#N/A	#N/A	#N/A	0	#N/A	#N/A	#N/A	#N/A	0	6	0.185715	0.908251	0.781681	0	0	4	0.0951792	0.561262	0.344992	0	0	#N/A	#N/A	#N/A	#N/A	0	0		0	NULL		0	NULL		0	NULL		0		0		0
Maoa	#N/A	#N/A	#N/A	#N/A	0	#N/A	#N/A	#N/A	#N/A	0	#N/A	#N/A	#N/A	#N/A	0	14	0.288295	0.302454	0.0394972	0	0	12	0.159044	0.562885	0.35126	0	0	#N/A	#N/A	#N/A	#N/A	0	0		0	NULL		0	NULL		0	NULL		0		0		0
Map1a	#N/A	#N/A	#N/A	#N/A	0	2	3.69388	0.0322546	0.0109724	0	2	0.643103	0.860664	0.798222	0	26	0.212798	0.615019	0.31864	0	0	19	0.0267621	0.960653	0.927125	0	0	#N/A	#N/A	#N/A	#N/A	0	0		0	NULL		0	NULL		0	NULL		0		0		0
[truncated: 948 more rows]
[truncated: 25 more columns]

## Sheet: Lists
	all																																	rbps
[truncated: 1,736 more rows]
[truncated: 25 more columns]

[truncated: 1 more sheets: iVenn]
